# Supplementary material for: Rice SST Variation Shapes the Rhizosphere Bacterial Community, Conferring Tolerance to Salt Stress through Regulating Soil Metabolites
Source: PubMed Central journal article supplement (PMC7687028; doi:10.1128/msystems.00721-20), 2020-11-24

Figure S3.

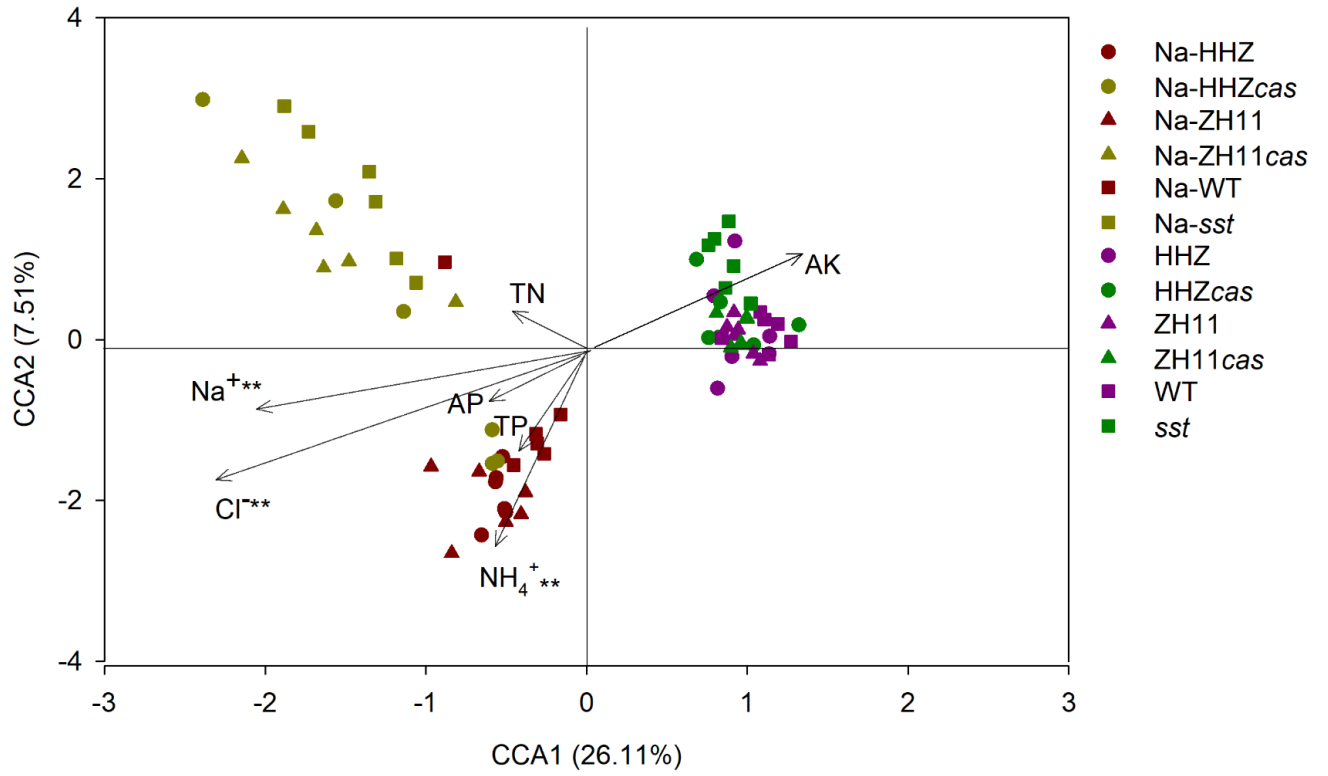

Supplement: mSystems.00721-20-sf003.pdf [file mSystems.00721-20-sf003.pdf]
