# Supplementary material for: Rice SST Variation Shapes the Rhizosphere Bacterial Community, Conferring Tolerance to Salt Stress through Regulating Soil Metabolites
Source: PubMed Central journal article supplement (PMC7687028; doi:10.1128/msystems.00721-20), 2020-11-24
Supplement: mSystems.00721-20-st001.pdf [file mSystems.00721-20-st001.pdf]

Table S1 Effects of NaCl treatment and different rice genotypes on soil physicochemical properties.

| Treatments         | pH          | SOC<br>(g/kg) | Total<br>Nitrogen<br>(g/kg) | Total<br>phosphorus<br>(g/kg) | Available<br>phosphorus<br>(mg/kg) | Available<br>potassium<br>(mg/kg) | NH <sub>4</sub> <sup>+</sup><br>(mg/kg) | NO <sub>3</sub> <sup>-</sup><br>(mg/kg) | Na <sup>+</sup> (mg/kg) | Cl <sup>-</sup><br>(mg/kg) |
|--------------------|-------------|---------------|-----------------------------|-------------------------------|------------------------------------|-----------------------------------|-----------------------------------------|-----------------------------------------|-------------------------|----------------------------|
| WT                 | 5.92 ± 0.08 | 29.53 ± 0.17  | 1.49 ± 0.01                 | 0.59 ± 0.001                  | 12.92 ± 0.11                       | 35.32 ± 0.14                      | 8.8 ± 0.52                              | 1.21 ± 0.3                              | 16.12 ± 0.08            | 14.89 ± 0.88               |
| <i>sst</i>         | 6.03 ± 0.05 | 29.53 ± 0.1   | 1.45 ± 0.02                 | 0.58 ± 0.002                  | 11.72 ± 0.09                       | 34.62 ± 0.21                      | 6.21 ± 0.52                             | 5.35 ± 0.3                              | 12.53 ± 0.23            | 12.26 ± 0.88               |
| HHZ                | 5.97 ± 0.06 | 28.82 ± 0.07  | 1.45 ± 0.01                 | 0.58 ± 0.001                  | 11.31 ± 0.14                       | 33.39 ± 0.32                      | 7.77 ± 0.52                             | 4.49 ± 0.3                              | 17.4 ± 0.27             | 11.68 ± 0.51               |
| HHZ <i>cas</i>     | 6.07 ± 0.06 | 29.7 ± 0.11   | 1.36 ± 0.01                 | 0.57 ± 0.01                   | 10.49 ± 0.19                       | 48.4 ± 0.37                       | 6.04 ± 0.3                              | 1.55 ± 0                                | 15.39 ± 0.19            | 20.73 ± 1.01               |
| ZH11               | 6.05 ± 0.02 | 30.19 ± 0.25  | 1.55 ± 0.02                 | 0.59 ± 0                      | 8.59 ± 0.19                        | 56.77 ± 0.19                      | 8.8 ± 0.52                              | 1.04 ± 0                                | 13.32 ± 0.14            | 17.52 ± 0                  |
| ZH11 <i>cas</i>    | 5.97 ± 0.05 | 29.16 ± 0.18  | 1.5 ± 0                     | 0.55 ± 0                      | 11.28 ± 0.14                       | 46.28 ± 0.21                      | 6.39 ± 0.3                              | 2 ± 0.12                                | 14.37 ± 0.08            | 14.89 ± 0.88               |
| Na-WT              | 5.69 ± 0.03 | 29.25 ± 0.23  | 1.5 ± 0.01                  | 0.55 ± 0.01                   | 15.16 ± 0.24                       | 74.47 ± 0.68                      | 19.85 ± 0.3                             | 0.64 ± 0.11                             | 1509.34 ± 3.97          | 2744.8 ± 13.38             |
| Na- <i>sst</i>     | 5.5 ± 0.03  | 29.37 ± 0.11  | 1.41 ± 0.01                 | 0.58 ± 0                      | 15.29 ± 0.14                       | 55.76 ± 0.35                      | 8.8 ± 0.52                              | 1.43 ± 0.16                             | 846.74 ± 17.0           | 3369.68 ± 13.38            |
| Na-HHZ             | 5.69 ± 0.04 | 28.37 ± 0.35  | 1.56 ± 0.01                 | 0.57 ± 0                      | 11.75 ± 0.14                       | 84.79 ± 0.47                      | 23.82 ± 0.52                            | 0.62 ± 0.1                              | 1581.24 ± 3.27          | 2838.24 ± 17.52            |
| Na-HHZ <i>cas</i>  | 5.63 ± 0.02 | 30.4 ± 0.08   | 1.62 ± 0.02                 | 0.58 ± 0                      | 11.43 ± 0.09                       | 73.9 ± 0.15                       | 13.46 ± 0                               | 3.83 ± 0.1                              | 1703.77 ± 4.84          | 3089.36 ± 26.76            |
| Na-ZH11            | 5.56 ± 0.01 | 29.91 ± 0.09  | 1.53 ± 0.01                 | 0.55 ± 0.01                   | 13.77 ± 0.14                       | 80.58 ± 0.38                      | 25.03 ± 0.3                             | 2.17 ± 0.1                              | 1481.44 ± 9.41          | 2709.76 ± 10.12            |
| Na-ZH11 <i>cas</i> | 5.63 ± 0.04 | 30.29 ± 0.19  | 1.55 ± 0.04                 | 0.57 ± 0                      | 15.19 ± 0.14                       | 74.55 ± 0.3                       | 16.22 ± 0.3                             | 2.49 ± 0.63                             | 1809.67 ± 1.98          | 3206.16 ± 23.18            |
| NaCl               | <0.001      | 0.548         | 0.006                       | 0.002                         | <0.001                             | <0.001                            | <0.001                                  | 0.124                                   | <0.001                  | <0.001                     |
| <i>sst</i>         | 0.671       | 0.036         | 0.124                       | 0.655                         | 0.54                               | 0.063                             | <0.001                                  | 0.028                                   | <0.001                  | <0.001                     |
| NaCl* <i>sst</i>   | 0.029       | 0.019         | 0.212                       | <0.001                        | 0.85                               | 0.023                             | <0.001                                  | 0.453                                   | <0.001                  | <0.001                     |
| LSD                | 0.0671      | 0.5235        | 0.0614                      | 0.00865                       | 1.502                              | 7.94                              | 1.972                                   | 1.441                                   | 37.89                   | 65.7                       |
