# Supplementary material for: Rice SST Variation Shapes the Rhizosphere Bacterial Community, Conferring Tolerance to Salt Stress through Regulating Soil Metabolites
Source: PubMed Central journal article supplement (PMC7687028; doi:10.1128/msystems.00721-20), 2020-11-24
Supplement: mSystems.00721-20-st002.pdf [file mSystems.00721-20-st002.pdf]

**TableS2 Differentially OTUs in the three pairs plants under the no-salt and salt conditions. (DESeq2; n=6;  $p < 0.05$ )**

| HHZ vs HHZcas                |             |                |            |            | WT vs sst |             |                |          |             |
|------------------------------|-------------|----------------|------------|------------|-----------|-------------|----------------|----------|-------------|
| OTU ID                       | baseMean    | log2FoldChange | pvalue     | padj       | OTU ID    | baseMean    | log2FoldChange | pvalue   | padj        |
| Otu000228                    | 86.34682329 | 4.489564001    | 1.41E-06   | 0.0109568  | Otu000013 | 479.7065101 | -0.88291506    | 9.04E-12 | 2.51E-08    |
| <b>ZH11 vs ZH11cas</b>       |             |                |            |            | Otu000351 | 70.87509494 | -2.93471227    | 1.25E-10 | 1.73E-07    |
| OTU ID                       | baseMean    | log2FoldChange | pvalue     | padj       | Otu000107 | 87.25843832 | -1.49057002    | 5.76E-10 | 5.32E-07    |
| Otu000228                    | 168.2888572 | 4.480607396    | 2.50E-13   | 4.93E-10   | Otu000084 | 240.6798361 | -2.29404607    | 2.76E-09 | 1.91E-06    |
| Otu000001                    | 28.08666715 | 2.632580949    | 5.68E-08   | 5.59E-05   | Otu000580 | 47.23932788 | -3.77228844    | 3.79E-09 | 2.10E-06    |
| Otu000011                    | 682.8784707 | 2.934622275    | 9.72E-07   | 0.00063814 | Otu000092 | 133.5850767 | -1.48023413    | 8.33E-09 | 3.85E-06    |
| Otu000113                    | 5.333197263 | 4.918387925    | 0.00011294 | 0.04449701 | Otu000017 | 32.67571666 | -4.10061275    | 1.06E-08 | 4.20E-06    |
| Otu000711                    | 15.05168491 | -1.562823339   | 0.00010839 | 0.04449701 | Otu000129 | 198.0331765 | -2.66083962    | 2.45E-08 | 8.48E-06    |
| <b>Na-HHZ vs Na-HHZcas</b>   |             |                |            |            | Otu000003 | 1702.47851  | 3.35112384     | 3.12E-08 | 8.64E-06    |
| OTU ID                       | baseMean    | log2FoldChange | pvalue     | padj       | Otu000247 | 128.1366257 | -4.34267159    | 3.43E-08 | 8.64E-06    |
| Otu000019                    | 655.2612942 | -2.421000782   | 9.86E-05   | 0.02073179 | Otu000586 | 36.07610361 | -3.38424683    | 3.43E-08 | 8.64E-06    |
| Otu000009                    | 850.3921576 | -3.707261133   | 1.24E-05   | 0.02073179 | Otu000138 | 110.3683749 | -1.3247038     | 8.59E-08 | 1.83E-05    |
| Otu000081                    | 187.9311816 | -2.550427224   | 0.00010292 | 0.02073179 | Otu000647 | 34.1936344  | -3.25594818    | 8.50E-08 | 1.83E-05    |
| Otu000044                    | 166.7250734 | -1.485538532   | 0.00011054 | 0.02073179 | Otu000027 | 314.1971444 | -1.16667385    | 1.04E-07 | 2.06E-05    |
| Otu000742                    | 42.91215511 | -3.893371487   | 3.81E-05   | 0.02073179 | Otu001704 | 17.70355759 | -6.15684185    | 1.27E-07 | 2.35E-05    |
| Otu001033                    | 15.62816396 | -4.875959533   | 8.72E-05   | 0.02073179 | Otu000674 | 33.59773919 | -3.75036953    | 1.42E-07 | 2.46E-05    |
| Otu000704                    | 15.96149223 | -2.773737192   | 7.56E-05   | 0.02073179 | Otu000009 | 345.2919074 | -2.59906191    | 1.92E-07 | 3.14E-05    |
| Otu000184                    | 53.2856109  | 1.375600022    | 6.67E-05   | 0.02073179 | Otu000035 | 152.9411055 | 1.26438169     | 2.09E-07 | 3.22E-05    |
| Otu001687                    | 5.225814134 | -3.203644297   | 9.93E-05   | 0.02073179 | Otu000683 | 66.81777938 | -8.08283254    | 2.44E-07 | 3.57E-05    |
| Otu000042                    | 318.8501674 | -3.584738342   | 0.00013627 | 0.02300182 | Otu000028 | 250.5884526 | -1.34599859    | 2.78E-07 | 3.67E-05    |
| Otu000001                    | 5457.201155 | -2.181464686   | 0.00017232 | 0.02553723 | Otu000573 | 28.04927177 | -1.8705041     | 2.77E-07 | 3.67E-05    |
| Otu001035                    | 11.50590782 | -1.435002516   | 0.00018154 | 0.02553723 | Otu001387 | 13.61986918 | -5.7957076     | 3.01E-07 | 3.79E-05    |
| Otu001278                    | 10.04591946 | -3.336888379   | 0.00019796 | 0.02570439 | Otu000007 | 142.0857029 | 1.51293604     | 3.23E-07 | 3.90E-05    |
| Otu001970                    | 7.334076777 | -3.951452173   | 0.00021507 | 0.02593145 | Otu000697 | 35.27466149 | -2.81567427    | 4.47E-07 | 5.16E-05    |
| Otu000897                    | 9.190385821 | -3.068991804   | 0.00034875 | 0.03679333 | Otu001643 | 10.01006067 | -4.27484756    | 7.58E-07 | 8.40E-05    |
| Otu000953                    | 17.12956933 | 2.11740117     | 0.00033771 | 0.03679333 | Otu000194 | 32.94051518 | 1.22914239     | 1.04E-06 | 0.000106366 |
| Otu000068                    | 215.6522464 | -3.132662051   | 0.00044412 | 0.03928174 | Otu000564 | 46.57700987 | -3.4089754     | 1.02E-06 | 0.000106366 |
| Otu000456                    | 31.91440812 | -2.693683358   | 0.00046542 | 0.03928174 | Otu000663 | 25.76623448 | 4.69236084     | 1.14E-06 | 0.000113199 |
| Otu000205                    | 51.29043897 | -1.217412857   | 0.00039988 | 0.03928174 | Otu000258 | 40.14641892 | -1.30421665    | 2.01E-06 | 0.000183306 |
| Otu000621                    | 13.48896495 | -1.309376903   | 0.00044642 | 0.03928174 | Otu000421 | 38.18264027 | -1.93588451    | 2.02E-06 | 0.000183306 |
| Otu000829                    | 27.13099229 | -4.876862037   | 0.0005682  | 0.04248727 | Otu001094 | 20.795256   | -5.17625226    | 2.05E-06 | 0.000183306 |
| Otu000638                    | 15.9715787  | -2.658115547   | 0.0005355  | 0.04248727 | Otu000184 | 39.52505453 | 1.7805452      | 2.79E-06 | 0.000240664 |
| Otu001141                    | 7.418351366 | -2.585478971   | 0.00062926 | 0.04248727 | Otu000188 | 117.1563399 | -1.73879936    | 2.87E-06 | 0.000240664 |
| Otu000292                    | 7.836004247 | 2.482542639    | 0.00061987 | 0.04248727 | Otu002198 | 5.450127368 | -3.36514247    | 3.09E-06 | 0.000251552 |
| Otu001157                    | 11.76524492 | 4.179251126    | 0.00062601 | 0.04248727 | Otu000748 | 29.4535924  | -2.44060332    | 3.18E-06 | 0.000252239 |
| Otu000231                    | 43.95380215 | 0.787343292    | 0.00076442 | 0.04837016 | Otu000846 | 38.18923813 | -3.31228342    | 4.62E-06 | 0.000355878 |
| Otu000691                    | 9.681938962 | -1.542423181   | 0.00077369 | 0.04837016 | Otu000037 | 320.6011808 | -1.65809572    | 5.18E-06 | 0.000387713 |
| <b>Na-ZH11 vs Na-ZH11cas</b> |             |                |            |            | Otu000304 | 40.08915681 | -1.09313702    | 6.70E-06 | 0.000471964 |
| OTU ID                       | baseMean    | log2FoldChange | pvalue     | padj       | Otu000461 | 41.54987639 | -0.96273524    | 6.63E-06 | 0.000471964 |
| Otu000006                    | 639.1118817 | -3.616899779   | 6.20E-14   | 1.51E-10   | Otu001832 | 8.59675771  | -3.29317041    | 6.81E-06 | 0.000471964 |
| Otu000096                    | 39.13862752 | -4.463984136   | 4.37E-09   | 5.31E-06   | Otu000303 | 55.52730849 | -1.24530721    | 7.08E-06 | 0.000478353 |
| Otu000105                    | 27.05310063 | -4.220137629   | 4.37E-08   | 3.54E-05   | Otu000030 | 213.6925239 | -1.37249019    | 7.38E-06 | 0.000487203 |
| Otu000618                    | 7.204868783 | -3.211784111   | 9.87E-08   | 6.00E-05   | Otu000187 | 86.35564771 | -1.5231254     | 8.30E-06 | 0.000535343 |
| Otu000028                    | 163.6485008 | -3.235456073   | 2.77E-07   | 0.00013485 | Otu000305 | 38.169461   | -1.23555389    | 9.70E-06 | 0.000611046 |
| Otu000499                    | 70.34454558 | -2.781868865   | 6.87E-07   | 0.00023847 | Otu000269 | 62.70560707 | -0.81529802    | 1.02E-05 | 0.000629366 |
| Otu003493                    | 9.438131493 | -6.448590634   | 6.77E-07   | 0.00023847 | Otu000490 | 50.32655238 | -2.5229762     | 1.12E-05 | 0.00067572  |
|                              |             |                |            |            | Otu000610 | 10.3755791  | 2.72703522     | 1.32E-05 | 0.000778264 |
|                              |             |                |            |            | Otu001105 | 12.90632178 | -2.9333088     | 1.48E-05 | 0.000854803 |
|                              |             |                |            |            | Otu000199 | 28.03673706 | 1.34427144     | 1.53E-05 | 0.000866782 |

|            |             |              |            |            |           |             |             |            |             |
|------------|-------------|--------------|------------|------------|-----------|-------------|-------------|------------|-------------|
| Otu000122  | 17.65640325 | -4.340476724 | 8.20E-07   | 0.00024908 | Otu000356 | 40.55516085 | -1.63122906 | 1.83E-05   | 0.000975995 |
| Otu000293  | 12.40518404 | -2.863370446 | 1.13E-06   | 0.00028042 | Otu001302 | 19.96535533 | -7.32038008 | 1.80E-05   | 0.000975995 |
| Otu0003513 | 9.319831855 | -6.436832605 | 1.15E-06   | 0.00028042 | Otu001842 | 8.94207278  | -4.74803698 | 1.83E-05   | 0.000975995 |
| Otu000063  | 22.95093836 | -4.96141971  | 1.30E-06   | 0.00028775 | Otu000207 | 14.51052777 | 2.35949812  | 1.97E-05   | 0.001024528 |
| Otu000074  | 28.70886952 | -5.015391085 | 3.15E-06   | 0.00058837 | Otu001187 | 13.11236997 | -2.3906681  | 2.00E-05   | 0.001024528 |
| Otu000344  | 39.08974397 | -3.426993474 | 2.97E-06   | 0.00058837 | Otu000773 | 27.28676206 | -2.63057355 | 2.09E-05   | 0.001054978 |
| Otu000351  | 21.41862484 | -3.46171414  | 3.44E-06   | 0.00059639 | Otu003657 | 3.719313429 | -4.86525782 | 2.15E-05   | 0.001065955 |
| Otu000030  | 16.92005026 | -3.285792444 | 4.58E-06   | 0.00074148 | Otu000357 | 44.88843611 | -1.94639714 | 2.33E-05   | 0.001130974 |
| Otu000001  | 7631.519702 | -2.211626107 | 5.90E-06   | 0.0008515  | Otu000238 | 27.3209612  | 1.42585853  | 2.63E-05   | 0.001235428 |
| Otu000020  | 188.5525363 | -0.722320768 | 6.19E-06   | 0.0008515  | Otu000262 | 52.0797948  | -1.02720808 | 2.63E-05   | 0.001235428 |
| Otu000183  | 65.07770005 | -1.395885606 | 6.31E-06   | 0.0008515  | Otu001553 | 8.811998307 | -3.30407849 | 2.96E-05   | 0.001369632 |
| Otu000151  | 31.52763443 | -4.760700173 | 6.85E-06   | 0.00087578 | Otu000022 | 454.9708655 | -0.88703583 | 3.61E-05   | 0.001625009 |
| Otu000352  | 45.90579814 | -1.631418525 | 7.75E-06   | 0.0009417  | Otu000135 | 328.3666323 | 4.37177288  | 3.69E-05   | 0.001625009 |
| Otu000139  | 97.52697742 | -2.528626956 | 1.79E-05   | 0.00207421 | Otu000358 | 30.53911879 | -1.25029352 | 3.65E-05   | 0.001625009 |
| Otu000135  | 19.30837317 | -3.278153025 | 2.39E-05   | 0.00252231 | Otu003570 | 3.693501261 | -5.36772129 | 3.80E-05   | 0.001647564 |
| Otu003260  | 8.329272259 | -3.203226339 | 2.38E-05   | 0.00252231 | Otu000502 | 29.1696498  | -1.81290386 | 3.89E-05   | 0.001657942 |
| Otu004337  | 3.819960455 | -5.622414357 | 2.89E-05   | 0.00292997 | Otu000192 | 73.72840453 | -1.9917839  | 4.22E-05   | 0.001773827 |
| Otu000023  | 111.5703288 | 2.740300777  | 3.83E-05   | 0.00372629 | Otu003270 | 2.402289371 | -4.22312316 | 4.40E-05   | 0.00182012  |
| Otu000002  | 853.3931207 | -2.741434382 | 4.01E-05   | 0.00374629 | Otu000300 | 44.5379735  | -1.29601641 | 4.73E-05   | 0.001908424 |
| Otu000225  | 23.39465409 | -2.294870229 | 4.73E-05   | 0.00426099 | Otu000954 | 14.00178968 | 2.16566597  | 4.75E-05   | 0.001908424 |
| Otu000807  | 27.63263184 | 2.230865578  | 6.44E-05   | 0.00559025 | Otu000698 | 20.3867005  | -2.08521867 | 6.14E-05   | 0.002431403 |
| Otu000095  | 29.85537546 | -1.932425431 | 6.80E-05   | 0.00569467 | Otu000887 | 7.248904647 | -1.98837921 | 6.52E-05   | 0.00254413  |
| Otu000005  | 948.5407083 | -2.051569487 | 9.09E-05   | 0.00735914 | Otu000006 | 888.2672827 | 0.59067197  | 6.93E-05   | 0.002630675 |
| Otu000186  | 44.14794208 | -2.741410998 | 0.0001064  | 0.00834043 | Otu001027 | 5.230034189 | 3.035437    | 6.85E-05   | 0.002630675 |
| Otu000003  | 804.4743859 | -1.74630854  | 0.00013795 | 0.01046652 | Otu001040 | 5.225190105 | 2.63894007  | 7.30E-05   | 0.002717442 |
| Otu000080  | 108.4165405 | -1.087824044 | 0.00014214 | 0.01046652 | Otu001607 | 5.289273015 | -2.66003421 | 7.35E-05   | 0.002717442 |
| Otu000929  | 8.485333391 | -2.668944244 | 0.00014657 | 0.01047549 | Otu000482 | 37.79934336 | -1.87068157 | 7.65E-05   | 0.00278989  |
| Otu000046  | 87.83347092 | -1.431027958 | 0.00019093 | 0.01325564 | Otu000420 | 35.30007093 | -1.74877963 | 8.05E-05   | 0.002897474 |
| Otu000029  | 569.4857636 | -2.880335359 | 0.00020358 | 0.01351209 | Otu000699 | 21.42754773 | -1.75109007 | 9.91E-05   | 0.00352257  |
| Otu000043  | 8.536668947 | -3.387220745 | 0.00020574 | 0.01351209 | Otu000390 | 41.89632374 | -1.23892244 | 0.00010631 | 0.003683762 |
| Otu000606  | 14.43276784 | -2.294193823 | 0.00022257 | 0.01423283 | Otu001364 | 5.545793795 | -2.3869039  | 0.00010586 | 0.003683762 |
| Otu000205  | 55.23593471 | 2.874652535  | 0.00023971 | 0.01479531 | Otu000128 | 63.89451251 | 1.12944229  | 0.00011295 | 0.003865456 |
| Otu003253  | 9.700646002 | -4.151225942 | 0.00024354 | 0.01479531 | Otu000116 | 67.68447805 | 1.29278961  | 0.00012173 | 0.004002685 |
| Otu000261  | 25.91597068 | -1.203392068 | 0.00025146 | 0.0149036  | Otu000253 | 54.31042273 | -0.91808427 | 0.00012389 | 0.004002685 |
| Otu000051  | 190.7166311 | -1.565730928 | 0.00025939 | 0.01500746 | Otu000263 | 11.7096935  | 1.6743988   | 0.000119   | 0.004002685 |
| Otu000219  | 2.898583482 | -4.225239514 | 0.00029324 | 0.01657142 | Otu000267 | 58.92333824 | -1.58933914 | 0.00012314 | 0.004002685 |
| Otu000985  | 19.97436263 | -5.545191021 | 0.0004131  | 0.02281433 | Otu000746 | 22.35872472 | -1.73754214 | 0.00012418 | 0.004002685 |
| Otu000014  | 605.1586876 | -2.825538323 | 0.00044985 | 0.024292   | Otu000589 | 57.98566163 | -3.00103669 | 0.00012634 | 0.004025403 |
| Otu000059  | 118.6507464 | -0.610617744 | 0.0005787  | 0.03057039 | Otu001772 | 3.330256348 | -4.19300196 | 0.00012938 | 0.004075377 |
| Otu001587  | 9.021877518 | -3.638949086 | 0.00063065 | 0.03260594 | Otu001971 | 11.35858359 | 6.50640864  | 0.00013198 | 0.00411076  |
| Otu000017  | 646.1049715 | -1.443513604 | 0.00066645 | 0.03371475 | Otu000484 | 12.35226579 | 1.50103569  | 0.00014342 | 0.004417204 |
| Otu000792  | 8.09463097  | -2.57739733  | 0.00067985 | 0.03371475 | Otu000229 | 83.65247817 | -1.91619057 | 0.00014766 | 0.004484891 |
| Otu004483  | 1.329858921 | -4.108012048 | 0.00073402 | 0.03567343 | Otu000884 | 5.581898204 | 2.40486468  | 0.00014943 | 0.004484891 |
| Otu001525  | 4.118802095 | -3.091731181 | 0.00076272 | 0.03634114 | Otu001339 | 10.173453   | -3.12583378 | 0.00015047 | 0.004484891 |
| Otu000415  | 14.66987281 | -1.620765417 | 0.00085041 | 0.03974034 | Otu000204 | 96.96777377 | -1.00232015 | 0.00015592 | 0.004597943 |
| Otu000264  | 9.418649817 | -2.706474604 | 0.00104621 | 0.04539816 | Otu000324 | 27.13035544 | 0.88945625  | 0.00015916 | 0.004644254 |
| Otu000353  | 46.26881069 | -1.205487097 | 0.00099148 | 0.04539816 | Otu001189 | 16.0287214  | -3.50232773 | 0.00017288 | 0.004991789 |
| Otu000407  | 19.43133369 | -2.78067509  | 0.00102987 | 0.04539816 | Otu000361 | 36.55487603 | -0.95680414 | 0.00018997 | 0.005428772 |
| Otu001648  | 2.854097531 | -4.164474278 | 0.00101273 | 0.04539816 | Otu000871 | 8.806065783 | 1.70299061  | 0.00019692 | 0.005513808 |
| Otu000045  | 122.2776757 | -1.969868437 | 0.00108413 | 0.04542121 | Otu002649 | 3.322179107 | -4.69911029 | 0.00019511 | 0.005513808 |
| Otu000050  | 124.5059643 | -1.897232161 | 0.00107831 | 0.04542121 | Otu000033 | 280.8118362 | -0.9219466  | 0.00020716 | 0.005693584 |
|            |             |              |            |            | Otu000657 | 13.47075536 | 1.4955286   | 0.00020745 | 0.005693584 |
|            |             |              |            |            | Otu000060 | 39.96853596 | 1.60639749  | 0.00021389 | 0.005791358 |
|            |             |              |            |            | Otu000593 | 25.25540066 | -1.11833963 | 0.00021519 | 0.005791358 |
|            |             |              |            |            | Otu001291 | 10.50809845 | -2.5457199  | 0.0002244  | 0.005981015 |

### Na-WT vs Na-ssT

|           | baseMean    | log2FoldChange | pvalue   | padj     |
|-----------|-------------|----------------|----------|----------|
| Otu000042 | 856.0732353 | -5.510504892   | 5.72E-19 | 1.49E-15 |

|           |             |              |            |            |           |             |             |            |             |
|-----------|-------------|--------------|------------|------------|-----------|-------------|-------------|------------|-------------|
| Otu000558 | 83.05740775 | -5.438734535 | 2.28E-12   | 2.96E-09   | Otu000029 | 262.8272812 | 0.79519591  | 0.00022783 | 0.006014634 |
| Otu000017 | 1053.687066 | -4.275562331 | 3.02E-10   | 2.62E-07   | Otu000590 | 9.546481998 | -1.80476374 | 0.00023109 | 0.006043351 |
| Otu000223 | 213.4582161 | -5.401560572 | 3.23E-09   | 2.10E-06   | Otu000928 | 23.76093425 | -2.49787496 | 0.00024313 | 0.006298611 |
| Otu000103 | 176.9183508 | 1.18378193   | 6.68E-09   | 3.48E-06   | Otu001516 | 6.584273284 | 1.83309414  | 0.00024949 | 0.006403507 |
| Otu000081 | 187.6920236 | -2.97628389  | 1.06E-08   | 4.61E-06   | Otu000282 | 72.88411326 | -2.46023487 | 0.00026006 | 0.006613735 |
| Otu000444 | 34.94980735 | -3.581427232 | 3.71E-08   | 1.38E-05   | Otu000306 | 51.88811553 | -1.08769601 | 0.00026505 | 0.006679196 |
| Otu000456 | 40.43845494 | -3.330571812 | 5.53E-08   | 1.79E-05   | Otu003854 | 2.392627339 | -4.74219078 | 0.0002709  | 0.006765219 |
| Otu002172 | 11.33256134 | -6.236338408 | 6.19E-08   | 1.79E-05   | Otu000457 | 29.79077021 | -5.04084387 | 0.00029653 | 0.007339002 |
| Otu000010 | 998.9109328 | -2.590828618 | 1.40E-07   | 3.64E-05   | Otu000998 | 14.8133395  | -1.40838636 | 0.0003018  | 0.007403422 |
| Otu000992 | 20.41361835 | -5.569496319 | 1.76E-07   | 4.17E-05   | Otu000317 | 37.79344976 | -0.91747471 | 0.00031241 | 0.007596462 |
| Otu000052 | 304.223973  | -3.035116903 | 1.93E-07   | 4.18E-05   | Otu001260 | 9.093591951 | -1.86370643 | 0.00032524 | 0.007839707 |
| Otu000415 | 12.40041088 | -2.472597268 | 2.93E-07   | 5.86E-05   | Otu001160 | 10.6128388  | -2.265035   | 0.00034407 | 0.008151789 |
| Otu000001 | 7719.891351 | -2.429481414 | 4.83E-07   | 8.99E-05   | Otu002232 | 4.633682928 | -3.08246122 | 0.00034179 | 0.008151789 |
| Otu000742 | 39.57138657 | -4.180829915 | 5.72E-07   | 9.93E-05   | Otu000393 | 55.80194446 | -2.2674304  | 0.00035182 | 0.008264781 |
| Otu000955 | 10.90608493 | -2.139605071 | 1.33E-06   | 0.00021682 | Otu002294 | 4.837683585 | -3.79848663 | 0.00036817 | 0.008576088 |
| Otu000045 | 118.3211302 | 0.731125137  | 3.37E-06   | 0.00051556 | Otu000504 | 8.971370728 | 1.43490696  | 0.00038409 | 0.008872492 |
| Otu000009 | 661.550546  | -2.766118487 | 3.64E-06   | 0.00052601 | Otu000513 | 32.17427099 | -1.34585424 | 0.00039778 | 0.009112841 |
| Otu000007 | 1723.90967  | 0.922159935  | 8.24E-06   | 0.00112868 | Otu001885 | 6.824532847 | -3.11896494 | 0.00045039 | 0.010233356 |
| Otu000704 | 18.30145242 | -2.192681134 | 8.81E-06   | 0.00114727 | Otu000227 | 26.89974355 | -1.38229426 | 0.00046405 | 0.010458192 |
| Otu000095 | 516.0361868 | -2.17659591  | 1.20E-05   | 0.00148268 | Otu000426 | 29.87501288 | -1.02979423 | 0.00047307 | 0.010575446 |
| Otu001399 | 9.485192864 | -3.957996116 | 1.51E-05   | 0.00178662 | Otu000943 | 23.14494702 | -1.26948132 | 0.00048535 | 0.010760499 |
| Otu001141 | 9.249016458 | -2.662018911 | 2.54E-05   | 0.00276065 | Otu001573 | 5.01703127  | -2.07526974 | 0.00048911 | 0.010760499 |
| Otu002736 | 4.254723365 | -5.284142397 | 2.53E-05   | 0.00276065 | Otu000431 | 19.1438667  | -1.36716139 | 0.00050051 | 0.010924587 |
| Otu000829 | 11.64733598 | -3.400548146 | 3.95E-05   | 0.003812   | Otu000275 | 51.24548638 | -0.88603481 | 0.00051341 | 0.011118518 |
| Otu000914 | 14.04782863 | -4.548524224 | 3.92E-05   | 0.003812   | Otu000050 | 156.9484712 | 0.86216259  | 0.00053642 | 0.011420128 |
| Otu001106 | 24.45647666 | -3.048763938 | 3.70E-05   | 0.003812   | Otu000066 | 196.004497  | -0.77522275 | 0.0005397  | 0.011420128 |
| Otu001915 | 5.242127999 | -3.249286119 | 7.33E-05   | 0.00681819 | Otu000424 | 7.016237941 | 1.84283238  | 0.00053941 | 0.011420128 |
| Otu000039 | 190.6280753 | -1.057285498 | 9.71E-05   | 0.00822898 | Otu000132 | 17.40174632 | 1.8646272   | 0.00054899 | 0.011481828 |
| Otu001050 | 5.080758543 | -3.506730833 | 9.80E-05   | 0.00822898 | Otu000134 | 83.75729037 | 1.00290628  | 0.00055918 | 0.011481828 |
| Otu002258 | 7.115286919 | -4.639803079 | 9.48E-05   | 0.00822898 | Otu000808 | 22.86997599 | -1.16970662 | 0.00055531 | 0.011481828 |
| Otu000493 | 15.68041012 | 3.634615478  | 0.00010607 | 0.00863167 | Otu002279 | 7.094289287 | -4.79725498 | 0.00055575 | 0.011481828 |
| Otu000019 | 889.9878696 | -2.403302959 | 0.00011184 | 0.00882496 | Otu000226 | 64.99063748 | -1.51760331 | 0.0005827  | 0.011715678 |
| Otu000424 | 61.56780963 | -1.94009952  | 0.0001411  | 0.01080642 | Otu000543 | 19.58383779 | -1.14559365 | 0.00058157 | 0.011715678 |
| Otu000227 | 66.79317544 | -1.689332352 | 0.00015801 | 0.01175574 | Otu001092 | 14.6186844  | -2.86284426 | 0.00058325 | 0.011715678 |
| Otu000295 | 40.42403816 | 1.255838857  | 0.00016737 | 0.01210632 | Otu000339 | 52.8619675  | -1.06948463 | 0.00060152 | 0.011742376 |
| Otu000026 | 480.2604183 | 1.219374316  | 0.00017897 | 0.01259545 | Otu000880 | 7.555709274 | -1.69931557 | 0.00059883 | 0.011742376 |
| Otu000150 | 95.60471508 | -1.804188525 | 0.00024196 | 0.01658081 | Otu001407 | 2.997980529 | 4.03440326  | 0.00059496 | 0.011742376 |
| Otu000953 | 15.50958421 | 1.911068794  | 0.00026435 | 0.01765031 | Otu002396 | 4.447540903 | -3.30760401 | 0.00060137 | 0.011742376 |
| Otu003631 | 2.452719511 | -4.995383105 | 0.00031464 | 0.02048315 | Otu000266 | 39.82033394 | -0.93839995 | 0.00065208 | 0.012442391 |
| Otu000184 | 64.97104797 | 1.715063163  | 0.0003316  | 0.02106092 | Otu000287 | 58.66409557 | -1.45979325 | 0.00066621 | 0.012442391 |
| Otu000393 | 28.13736066 | -2.063015792 | 0.00035875 | 0.02224279 | Otu000689 | 20.22835073 | -2.30997763 | 0.0006688  | 0.012442391 |
| Otu002349 | 3.098724315 | 3.309661712  | 0.00043686 | 0.02645525 | Otu000669 | 17.13793901 | 1.85726474  | 0.000662   | 0.012442391 |
| Otu003277 | 2.236934978 | -4.325607983 | 0.0005167  | 0.03057899 | Otu000726 | 12.31023229 | 2.73669234  | 0.00066132 | 0.012442391 |
| Otu001865 | 6.069528786 | 4.356313277  | 0.0005684  | 0.03289158 | Otu001570 | 8.984173293 | -2.48609    | 0.00066683 | 0.012442391 |
| Otu000080 | 269.5414468 | 2.312317911  | 0.0006412  | 0.03552511 | Otu001866 | 7.09612313  | 2.06793298  | 0.00065044 | 0.012442391 |
| Otu001278 | 10.53663745 | -2.870670773 | 0.0006341  | 0.03552511 | Otu003274 | 2.102899265 | 4.04125001  | 0.00068028 | 0.012571574 |
| Otu001233 | 4.381786022 | -2.084817062 | 0.00068988 | 0.03742603 | Otu001179 | 12.13669913 | -2.62779842 | 0.00069684 | 0.012792233 |
| Otu000030 | 335.5461892 | -0.942915414 | 0.00072583 | 0.03783163 | Otu001666 | 3.614650529 | -3.78997498 | 0.00070489 | 0.01285496  |
| Otu001270 | 8.62582692  | -1.541643037 | 0.00072641 | 0.03783163 | Otu000264 | 27.14355549 | 1.41225819  | 0.00071112 | 0.012883773 |
| Otu000174 | 59.41911938 | -1.011850841 | 0.00082066 | 0.04190209 | Otu000071 | 183.7633151 | 1.63238657  | 0.00073699 | 0.013228366 |
| Otu000308 | 58.39758452 | 1.203544452  | 0.00098947 | 0.04954974 | Otu001228 | 5.155197169 | 2.79657678  | 0.00073981 | 0.013228366 |
| Otu000963 | 7.07311573  | 4.141102387  | 0.00101426 | 0.04967152 | Otu003843 | 1.971025975 | -3.92269501 | 0.00074445 | 0.013228366 |
| Otu001135 | 11.02020919 | -1.35139324  | 0.00103005 | 0.04967152 | Otu000347 | 23.0924898  | 1.06705491  | 0.00075919 | 0.013319506 |
|           |             |              |            |            | Otu002960 | 2.888537724 | -3.96939868 | 0.00075594 | 0.013319506 |
|           |             |              |            |            | Otu000381 | 43.09663634 | -1.57097904 | 0.0008596  | 0.01480186  |
|           |             |              |            |            | Otu000785 | 20.19492029 | -1.45619638 | 0.0008597  | 0.01480186  |

|           |             |             |            |             |
|-----------|-------------|-------------|------------|-------------|
| Otu001120 | 14.40318501 | -1.3491982  | 0.00085952 | 0.01480186  |
| Otu001753 | 6.736866918 | -2.71020989 | 0.0008688  | 0.014866187 |
| Otu000062 | 129.7188599 | 0.59395814  | 0.00089035 | 0.015141477 |
| Otu003122 | 2.138831154 | -4.04283327 | 0.00090193 | 0.015244737 |
| Otu001621 | 11.89244913 | 3.50443125  | 0.00092902 | 0.015607487 |
| Otu000464 | 37.32575467 | -1.99086455 | 0.00094339 | 0.015659153 |
| Otu001394 | 11.28514981 | -2.19502993 | 0.00094294 | 0.015659153 |
| Otu000341 | 16.86587461 | 1.33717538  | 0.00097034 | 0.015915826 |
| Otu000638 | 5.709872398 | -2.96043571 | 0.00096523 | 0.015915826 |
| Otu000648 | 10.07112715 | 1.31541552  | 0.0009781  | 0.015948761 |
| Otu000403 | 29.30367297 | -0.8732433  | 0.00098623 | 0.015987263 |
| Otu001786 | 4.154069673 | -2.44768108 | 0.00100602 | 0.016213337 |
| Otu000183 | 90.901723   | -0.86547716 | 0.00105852 | 0.016884543 |
| Otu001128 | 7.806658335 | -2.442444   | 0.00106447 | 0.016884543 |
| Otu001461 | 9.019048577 | -3.33535932 | 0.00106594 | 0.016884543 |
| Otu001742 | 6.824906776 | -2.10784563 | 0.0010768  | 0.016959548 |
| Otu003722 | 2.660761737 | -3.83474621 | 0.00109484 | 0.01714637  |
| Otu000826 | 17.09691162 | -1.52824881 | 0.00110897 | 0.017270054 |
| Otu001610 | 8.20160504  | -2.19589949 | 0.00111816 | 0.017315929 |
| Otu000280 | 35.47350613 | -1.41657095 | 0.0011306  | 0.017411238 |
| Otu000413 | 27.22229707 | 0.90703192  | 0.00116895 | 0.017902438 |
| Otu001323 | 3.157389973 | 3.5780419   | 0.00118095 | 0.017986789 |
| Otu000213 | 70.21402393 | -0.95261418 | 0.00120025 | 0.018081958 |
| Otu000576 | 17.60579739 | -1.22093622 | 0.00119527 | 0.018081958 |
| Otu000888 | 18.77560402 | 2.06370495  | 0.00121534 | 0.018210318 |
| Otu000235 | 47.95777444 | 0.65281103  | 0.00129054 | 0.019028595 |
| Otu000311 | 49.17698301 | -1.6152207  | 0.00128662 | 0.019028595 |
| Otu001456 | 3.983742584 | -2.15209811 | 0.00128063 | 0.019028595 |
| Otu000782 | 17.54251482 | -1.51279291 | 0.00130288 | 0.019108873 |
| Otu000878 | 11.56971685 | -1.42738435 | 0.00131384 | 0.019168259 |
| Otu000077 | 173.9131308 | -1.24314655 | 0.0013872  | 0.020132547 |
| Otu000112 | 150.8511661 | 0.71988445  | 0.00139826 | 0.020187354 |
| Otu000121 | 145.4477521 | 0.8336211   | 0.00140917 | 0.020239466 |
| Otu000425 | 21.43709896 | 0.92822025  | 0.0014209  | 0.02030272  |
| Otu000712 | 37.07653551 | -2.06321831 | 0.0014395  | 0.020463057 |
| Otu000702 | 16.04392453 | -1.03756413 | 0.00152479 | 0.021564908 |
| Otu000046 | 337.7827187 | 1.19310073  | 0.00154172 | 0.021693592 |
| Otu000127 | 76.35294968 | 0.68483405  | 0.00159198 | 0.022287685 |
| Otu000131 | 93.92405553 | -0.95627625 | 0.00161884 | 0.022549808 |
| Otu000682 | 14.66033947 | -1.68198047 | 0.00163553 | 0.022668422 |
| Otu002067 | 7.395632802 | -2.91721039 | 0.00164774 | 0.022724075 |
| Otu000045 | 179.2215028 | 1.04581815  | 0.0016803  | 0.023032481 |
| Otu003081 | 3.515455213 | -2.65013628 | 0.00168672 | 0.023032481 |
| Otu000075 | 208.2276736 | -0.81021527 | 0.00173102 | 0.023521479 |
| Otu000429 | 20.85258062 | -1.01906557 | 0.00179961 | 0.024216106 |
| Otu002648 | 1.558784123 | 3.56807227  | 0.00179796 | 0.024216106 |
| Otu000025 | 229.025819  | -0.44898857 | 0.00185763 | 0.024404546 |
| Otu000026 | 39.40121588 | 2.12784623  | 0.00183308 | 0.024404546 |
| Otu000114 | 71.1688104  | 0.83955262  | 0.00185359 | 0.024404546 |
| Otu000175 | 67.89190803 | -0.86394461 | 0.00185752 | 0.024404546 |
| Otu001072 | 6.408663858 | 1.56338732  | 0.00183758 | 0.024404546 |
| Otu002019 | 7.162767508 | -3.11450648 | 0.00194103 | 0.025379947 |
| Otu001881 | 5.993349229 | 1.87168468  | 0.00196167 | 0.02552928  |
| Otu000136 | 101.5953696 | -0.99907094 | 0.00199143 | 0.025795585 |
| Otu002424 | 4.961965353 | -1.77587242 | 0.00202715 | 0.026136079 |
| Otu001700 | 9.932240254 | -1.58438334 | 0.00210034 | 0.026954381 |

|           |             |             |            |             |
|-----------|-------------|-------------|------------|-------------|
| Otu000070 | 54.9366377  | 1.72887939  | 0.00211746 | 0.027048833 |
| Otu000044 | 149.2192947 | -0.96982978 | 0.00214614 | 0.027289428 |
| Otu000422 | 5.861631327 | 1.98396232  | 0.00217168 | 0.027488165 |
| Otu001811 | 4.850602502 | -2.92002698 | 0.00221971 | 0.027968318 |
| Otu000102 | 176.4878804 | -0.79494791 | 0.00227917 | 0.028587546 |
| Otu001341 | 5.119702132 | -2.45539697 | 0.00231476 | 0.028903245 |
| Otu000148 | 102.4704234 | -0.58029279 | 0.00236819 | 0.029437711 |
| Otu000415 | 23.42497267 | -1.87562629 | 0.00257227 | 0.031679687 |
| Otu000414 | 37.67477592 | -0.88678689 | 0.00258283 | 0.031679687 |
| Otu002246 | 2.069270536 | -3.44356623 | 0.00256234 | 0.031679687 |
| Otu002115 | 1.97631016  | 3.38332186  | 0.00263074 | 0.032125153 |
| Otu001076 | 9.422777699 | -1.21322891 | 0.00264653 | 0.032176278 |
| Otu000471 | 16.68842885 | 0.95670605  | 0.00267785 | 0.032414907 |
| Otu000231 | 37.74343903 | 0.81459092  | 0.00273325 | 0.032941639 |
| Otu001687 | 2.679266603 | -2.87200326 | 0.00276229 | 0.033147508 |
| Otu001230 | 10.8896663  | 1.33572305  | 0.00283145 | 0.033830983 |
| Otu001987 | 6.868428725 | -2.74288261 | 0.00285246 | 0.033935688 |
| Otu000103 | 32.76135172 | 1.61819898  | 0.00295113 | 0.034868734 |
| Otu000364 | 41.43305303 | -1.01724164 | 0.00295604 | 0.034868734 |
| Otu001138 | 7.608722449 | -1.62448632 | 0.00297944 | 0.034995776 |
| Otu000441 | 17.63401333 | 0.98307072  | 0.00299246 | 0.035000435 |
| Otu000201 | 90.7414699  | -1.28024396 | 0.00302283 | 0.035207107 |
| Otu001342 | 5.169754277 | -1.70569759 | 0.00304799 | 0.035351529 |
| Otu000140 | 36.6684968  | 0.84521204  | 0.00313857 | 0.036192441 |
| Otu002574 | 5.152451854 | -3.3041999  | 0.0031466  | 0.036192441 |
| Otu000479 | 20.43740475 | -0.8915804  | 0.00321688 | 0.036847907 |
| Otu002629 | 3.524788027 | -2.93012502 | 0.00323745 | 0.036930929 |
| Otu000962 | 18.71030879 | 1.12054357  | 0.00332317 | 0.037753394 |
| Otu000090 | 216.883354  | 2.24073349  | 0.00342262 | 0.038273546 |
| Otu000108 | 132.2204884 | -0.6460683  | 0.0034179  | 0.038273546 |
| Otu000334 | 13.68799249 | 1.21079077  | 0.00342418 | 0.038273546 |
| Otu004333 | 1.560226381 | -3.56703414 | 0.00339255 | 0.038273546 |
| Otu002301 | 5.064416472 | -2.55288948 | 0.00346429 | 0.038566338 |
| Otu001796 | 5.739260199 | -1.56200488 | 0.00349065 | 0.038704376 |
| Otu000222 | 26.04695219 | 1.22587636  | 0.00355116 | 0.03921834  |
| Otu000711 | 21.0849203  | -1.45607709 | 0.00360429 | 0.039551136 |
| Otu003660 | 1.990007486 | -3.93174341 | 0.00360983 | 0.039551136 |
| Otu000365 | 28.95561105 | 0.71719075  | 0.00375569 | 0.040987259 |
| Otu000736 | 18.52465027 | -1.42795018 | 0.00380306 | 0.041341465 |
| Otu000167 | 80.33903991 | -0.63630499 | 0.00384309 | 0.04161347  |
| Otu001803 | 6.704644231 | -1.47953995 | 0.00397962 | 0.042924158 |
| Otu000118 | 99.50103654 | 0.72814679  | 0.0040826  | 0.043734734 |
| Otu000618 | 18.43142562 | 1.4272538   | 0.00409486 | 0.043734734 |
| Otu001490 | 6.422142718 | 1.58992264  | 0.0041021  | 0.043734734 |
| Otu000181 | 57.34728709 | -0.67320024 | 0.00415548 | 0.043803639 |
| Otu000277 | 85.92743291 | 0.98384292  | 0.00418758 | 0.043803639 |
| Otu001505 | 6.959766099 | -2.03123603 | 0.0041806  | 0.043803639 |
| Otu001737 | 8.495258915 | 2.0301132   | 0.00417051 | 0.043803639 |
| Otu002137 | 3.334164544 | 3.23648824  | 0.0041383  | 0.043803639 |
| Otu002400 | 3.18722153  | -2.20599127 | 0.00422902 | 0.04406573  |
| Otu002491 | 2.083130622 | 2.94145114  | 0.00426032 | 0.04406573  |
| Otu003246 | 3.130348143 | -2.73945548 | 0.0042468  | 0.04406573  |
| Otu000903 | 21.27546628 | -1.93106558 | 0.004282   | 0.044125245 |
| Otu001931 | 4.162832232 | -1.87309777 | 0.00435168 | 0.044677274 |
| Otu000172 | 83.47916351 | -0.45295321 | 0.00438963 | 0.044900554 |
| Otu003780 | 1.962299004 | 4.46256512  | 0.00463895 | 0.047276308 |

|           |             |             |            |             |
|-----------|-------------|-------------|------------|-------------|
| Otu000270 | 17.90933022 | -1.57588129 | 0.00489226 | 0.049355644 |
| Otu001360 | 8.301319676 | -1.55899058 | 0.00489639 | 0.049355644 |
| Otu002811 | 1.419876398 | 3.41772125  | 0.00489145 | 0.049355644 |
| Otu000437 | 17.41186161 | 1.61387201  | 0.00493341 | 0.049486367 |
| Otu001054 | 10.51791213 | -1.7496681  | 0.0049557  | 0.049486367 |
| Otu001115 | 7.054783986 | 1.68561222  | 0.00496292 | 0.049486367 |
| Otu000212 | 58.28856839 | -0.51242747 | 0.00507838 | 0.049919315 |
| Otu000451 | 26.5161681  | -1.13442067 | 0.00504581 | 0.049919315 |
| Otu000655 | 17.04771088 | 5.07681636  | 0.00505103 | 0.049919315 |
| Otu001598 | 3.987138503 | 1.9810824   | 0.00507068 | 0.049919315 |
| Otu001912 | 7.088744429 | -1.77729158 | 0.00509638 | 0.049919315 |
