# Supplementary material for: Rice SST Variation Shapes the Rhizosphere Bacterial Community, Conferring Tolerance to Salt Stress through Regulating Soil Metabolites
Source: PubMed Central journal article supplement (PMC7687028; doi:10.1128/msystems.00721-20), 2020-11-24
Supplement: mSystems.00721-20-st003.pdf [file mSystems.00721-20-st003.pdf]

**TableS3 Peaks with names were detected in Na-HHZ and Na-HHZcas**

| index    | Na-HHZ_mean | Na-HHZcas_mean | log2_FC  | Pvalue   | fdr    | vip     | MS2 name                            | MS2 score | MS1 name | MS1 ppm | SuperClass                      | formula  | CAS      | molecular weight | rt       | mz         |
|----------|-------------|----------------|----------|----------|--------|---------|-------------------------------------|-----------|----------|---------|---------------------------------|----------|----------|------------------|----------|------------|
| NEG00001 | 182912.1374 | 140060.4869    | -0.3851  | 0.445119 | 0.7774 | 0.15926 | Stearic acid                        | 0.9999835 |          |         | Lipids and lipid-like molecules | -        | -        | -                | 35.0365  | 284.059318 |
| NEG00002 | 479905.6533 | 495649.1635    | 0.046568 | 0.864306 | 0.9547 | 0.02459 | 16-Methylheptadecanoic acid         | 0.9999723 |          |         | Lipids and lipid-like molecules | -        | -        | -                | 57.50755 | 283.072365 |
| NEG00003 | 14169963.33 | 14819907.14    | 0.0647   | 0.703395 | 0.8994 | 0.14175 | methyl acetate                      | 0.9999657 |          |         | Organic acids and derivatives   | -        | -        | -                | 117.15   | 73.0294714 |
| NEG00004 | 26157444.27 | 24913406.91    | -0.0703  | 0.838897 | 0.9471 | 0.62125 | propanoic acid                      | 0.9999578 |          |         | Organic acids and derivatives   | -        | -        | -                | 5.41692  | 73.0294614 |
| NEG00005 | 83566688    | 81838528.67    | -0.03015 | 0.83447  | 0.9453 | 0.02627 | cis-Vaccenic acid                   | 0.9999536 |          |         | Lipids and lipid-like molecules | C18H34O2 | 506-17-2 | 282.2559         | 43.25095 | 281.248263 |
| NEG00006 | 767403.1236 | 720177.3821    | -0.09163 | 0.632789 | 0.8642 | 0.05427 | 15-Methylpalmitate                  | 0.99995   |          |         | Organic compounds               | -        | -        | -                | 36.2849  | 269.045448 |
| NEG00007 | 1230933.378 | 761714.7195    | -0.69243 | 0.188081 | 0.6466 | 0.65294 | (9Z,12Z)-octadeca-9,12-dienoic acid | 0.9999045 |          |         | Lipids and lipid-like molecules | -        | -        | -                | 37.3507  | 278.248727 |
| NEG00008 | 121714.4482 | 97929.56435    | -0.31368 | 0.252675 | 0.6865 | 0.16306 | (Z)-hexadec-9-enoic acid            | 0.9998888 |          |         | Lipids and lipid-like molecules | -        | -        | -                | 40.4453  | 252.969757 |
| NEG00009 | 24462.80476 | 49916.50338    | 1.028927 | 0.173157 | 0.6325 | 0.15379 | Palmitic acid                       | 0.99985   |          |         | Lipids and lipid-like molecules | -        | -        | -                | 48.5006  | 254.815736 |
| NEG00010 | 46216082.27 | 76811757.68    | 0.732932 | 0.653254 | 0.8741 | 2.26193 | nonanoic acid                       | 0.999759  |          |         | Lipids and lipid-like molecules | -        | -        | -                | 56.6136  | 157.050776 |
| NEG00011 | 2905627.002 | 3282089.143    | 0.175765 | 0.715204 | 0.9033 | 0.18443 | 2-hydroxybenzaldehyde               | 0.9997175 |          |         | Benzenoids                      | -        | -        | -                | 20.7452  | 121.014665 |
| NEG00012 | 25185027.61 | 25812867.08    | 0.035524 | 0.89146  | 0.9637 | 0.18219 | ethyl dodecanoate                   | 0.9996655 |          |         | Lipids and lipid-like molecules | -        | -        | -                | 50.0906  | 227.201462 |
| NEG00013 | 84007.52366 | 87710.72601    | 0.062235 | 0.881823 | 0.9595 | 0.00849 | dodecanoic acid                     | 0.9996395 |          |         | Lipids and lipid-like molecules | -        | -        | -                | 34.78085 | 198.912959 |
| NEG00014 | 94194.01375 | 100550.859     | 0.094218 | 0.688377 | 0.8909 | 0.01797 | 4-dodecylbenzenesulfonic acid       | 0.9993612 |          |         | Benzenoids                      | -        | -        | -                | 25.5928  | 324.209364 |
| NEG00015 | 364416.2507 | 291979.2098    | -0.31972 | 0.572873 | 0.8369 | 0.14011 | Saccharin                           | 0.9988709 |          |         | Organoheterocyclic compounds    | -        | -        | -                | 5.24534  | 180.991569 |
| NEG00016 | 30393216.95 | 22888215.35    | -0.40914 | 0.037998 | 0.4277 | 3.01951 | heptadecanoic acid                  | 0.9988167 |          |         | Lipids and lipid-like molecules | C17H34O2 | 506-12-7 | 270.2559         | 43.5668  | 269.248337 |
| NEG00017 | 365409.7452 | 336488.1214    | -0.11896 | 0.576487 | 0.839  | 0.13493 | methanesulfonic acid                | 0.998628  |          |         | Organic compounds               | -        | -        | -                | 32.51325 | 94.9653641 |
| NEG00018 | 7748543.946 | 6873229.283    | -0.17294 | 0.047974 | 0.4632 | 1.25397 | phthalic acid                       | 0.9983465 |          |         | Benzenoids                      | C8H6O4   | 88-99-3  | 166.0266         | 350.811  | 165.019073 |
| NEG00019 | 7748543.946 | 6873229.283    | -0.17294 | 0.047974 | 0.4632 | 1.25397 | phthalic acid                       | 1.9983465 |          |         | Benzenoids                      | C8H6O5   | 88-99-4  | 166.0266         | 350.811  | 165.019073 |
| NEG00020 | 7748543.946 | 6873229.283    | -0.17294 | 0.047974 | 0.4632 | 1.25397 | phthalic acid                       | 2.9983465 |          |         | Benzenoids                      | C8H6O6   | 88-99-5  | 166.0266         | 350.811  | 165.019073 |
| NEG00021 | 7748543.946 | 6873229.283    | -0.17294 | 0.047974 | 0.4632 | 1.25397 | phthalic acid                       | 3.9983465 |          |         | Benzenoids                      | C8H6O7   | 88-99-6  | 166.0266         | 350.811  | 165.019073 |

|          |             |             |          |          |        |         |               |           |            |         |          |          |         |            |
|----------|-------------|-------------|----------|----------|--------|---------|---------------|-----------|------------|---------|----------|----------|---------|------------|
| NEG00022 | 7748543.946 | 6873229.283 | -0.17294 | 0.047974 | 0.4632 | 1.25397 | phthalic acid | 4.9983465 | Benzenoids | C8H6O8  | 88-99-7  | 166.0266 | 350.811 | 165.019073 |
| NEG00023 | 7748543.946 | 6873229.283 | -0.17294 | 0.047974 | 0.4632 | 1.25397 | phthalic acid | 5.9983465 | Benzenoids | C8H6O9  | 88-99-8  | 166.0266 | 350.811 | 165.019073 |
| NEG00024 | 7748543.946 | 6873229.283 | -0.17294 | 0.047974 | 0.4632 | 1.25397 | phthalic acid | 6.9983465 | Benzenoids | C8H6O10 | 88-99-9  | 166.0266 | 350.811 | 165.019073 |
| NEG00025 | 7748543.946 | 6873229.283 | -0.17294 | 0.047974 | 0.4632 | 1.25397 | phthalic acid | 7.9983465 | Benzenoids | C8H6O11 | 88-99-10 | 166.0266 | 350.811 | 165.019073 |
| NEG00026 | 7748543.946 | 6873229.283 | -0.17294 | 0.047974 | 0.4632 | 1.25397 | phthalic acid | 8.9983465 | Benzenoids | C8H6O12 | 88-99-11 | 166.0266 | 350.811 | 165.019073 |
| NEG00027 | 7748543.946 | 6873229.283 | -0.17294 | 0.047974 | 0.4632 | 1.25397 | phthalic acid | 9.9983465 | Benzenoids | C8H6O13 | 88-99-12 | 166.0266 | 350.811 | 165.019073 |
| NEG00028 | 7748543.946 | 6873229.283 | -0.17294 | 0.047974 | 0.4632 | 1.25397 | phthalic acid | 10.998346 | Benzenoids | C8H6O14 | 88-99-13 | 166.0266 | 350.811 | 165.019073 |
| NEG00029 | 7748543.946 | 6873229.283 | -0.17294 | 0.047974 | 0.4632 | 1.25397 | phthalic acid | 11.998346 | Benzenoids | C8H6O15 | 88-99-14 | 166.0266 | 350.811 | 165.019073 |
| NEG00030 | 7748543.946 | 6873229.283 | -0.17294 | 0.047974 | 0.4632 | 1.25397 | phthalic acid | 12.998346 | Benzenoids | C8H6O16 | 88-99-15 | 166.0266 | 350.811 | 165.019073 |
| NEG00031 | 7748543.946 | 6873229.283 | -0.17294 | 0.047974 | 0.4632 | 1.25397 | phthalic acid | 13.998346 | Benzenoids | C8H6O17 | 88-99-16 | 166.0266 | 350.811 | 165.019073 |
| NEG00032 | 7748543.946 | 6873229.283 | -0.17294 | 0.047974 | 0.4632 | 1.25397 | phthalic acid | 14.998346 | Benzenoids | C8H6O18 | 88-99-17 | 166.0266 | 350.811 | 165.019073 |
| NEG00033 | 7748543.946 | 6873229.283 | -0.17294 | 0.047974 | 0.4632 | 1.25397 | phthalic acid | 15.998346 | Benzenoids | C8H6O19 | 88-99-18 | 166.0266 | 350.811 | 165.019073 |
| NEG00034 | 7748543.946 | 6873229.283 | -0.17294 | 0.047974 | 0.4632 | 1.25397 | phthalic acid | 16.998346 | Benzenoids | C8H6O20 | 88-99-19 | 166.0266 | 350.811 | 165.019073 |
| NEG00035 | 7748543.946 | 6873229.283 | -0.17294 | 0.047974 | 0.4632 | 1.25397 | phthalic acid | 17.998346 | Benzenoids | C8H6O21 | 88-99-20 | 166.0266 | 350.811 | 165.019073 |
| NEG00036 | 7748543.946 | 6873229.283 | -0.17294 | 0.047974 | 0.4632 | 1.25397 | phthalic acid | 18.998346 | Benzenoids | C8H6O22 | 88-99-21 | 166.0266 | 350.811 | 165.019073 |
| NEG00037 | 7748543.946 | 6873229.283 | -0.17294 | 0.047974 | 0.4632 | 1.25397 | phthalic acid | 19.998346 | Benzenoids | C8H6O23 | 88-99-22 | 166.0266 | 350.811 | 165.019073 |
| NEG00038 | 7748543.946 | 6873229.283 | -0.17294 | 0.047974 | 0.4632 | 1.25397 | phthalic acid | 20.998346 | Benzenoids | C8H6O24 | 88-99-23 | 166.0266 | 350.811 | 165.019073 |
| NEG00039 | 7748543.946 | 6873229.283 | -0.17294 | 0.047974 | 0.4632 | 1.25397 | phthalic acid | 21.998346 | Benzenoids | C8H6O25 | 88-99-24 | 166.0266 | 350.811 | 165.019073 |
| NEG00040 | 7748543.946 | 6873229.283 | -0.17294 | 0.047974 | 0.4632 | 1.25397 | phthalic acid | 22.998346 | Benzenoids | C8H6O26 | 88-99-25 | 166.0266 | 350.811 | 165.019073 |
| NEG00041 | 7748543.946 | 6873229.283 | -0.17294 | 0.047974 | 0.4632 | 1.25397 | phthalic acid | 23.998346 | Benzenoids | C8H6O27 | 88-99-26 | 166.0266 | 350.811 | 165.019073 |
| NEG00042 | 7748543.946 | 6873229.283 | -0.17294 | 0.047974 | 0.4632 | 1.25397 | phthalic acid | 24.998346 | Benzenoids | C8H6O28 | 88-99-27 | 166.0266 | 350.811 | 165.019073 |
| NEG00043 | 7748543.946 | 6873229.283 | -0.17294 | 0.047974 | 0.4632 | 1.25397 | phthalic acid | 25.998346 | Benzenoids | C8H6O29 | 88-99-28 | 166.0266 | 350.811 | 165.019073 |
| NEG00044 | 7748543.946 | 6873229.283 | -0.17294 | 0.047974 | 0.4632 | 1.25397 | phthalic acid | 26.998346 | Benzenoids | C8H6O30 | 88-99-29 | 166.0266 | 350.811 | 165.019073 |

|          |             |             |          |          |        |         |                                                                           |           |                                 |          |            |          |          |            |
|----------|-------------|-------------|----------|----------|--------|---------|---------------------------------------------------------------------------|-----------|---------------------------------|----------|------------|----------|----------|------------|
| NEG00045 | 7748543.946 | 6873229.283 | -0.17294 | 0.047974 | 0.4632 | 1.25397 | phthalic acid                                                             | 27.998346 | Benzenoids                      | C8H6O31  | 88-99-30   | 166.0266 | 350.811  | 165.019073 |
| NEG00046 | 7748543.946 | 6873229.283 | -0.17294 | 0.047974 | 0.4632 | 1.25397 | phthalic acid                                                             | 28.998346 | Benzenoids                      | C8H6O32  | 88-99-31   | 166.0266 | 350.811  | 165.019073 |
| NEG00047 | 7748543.946 | 6873229.283 | -0.17294 | 0.047974 | 0.4632 | 1.25397 | phthalic acid                                                             | 29.998346 | Benzenoids                      | C8H6O33  | 88-99-32   | 166.0266 | 350.811  | 165.019073 |
| NEG00048 | 7748543.946 | 6873229.283 | -0.17294 | 0.047974 | 0.4632 | 1.25397 | phthalic acid                                                             | 30.998346 | Benzenoids                      | C8H6O34  | 88-99-33   | 166.0266 | 350.811  | 165.019073 |
| NEG00049 | 7748543.946 | 6873229.283 | -0.17294 | 0.047974 | 0.4632 | 1.25397 | phthalic acid                                                             | 31.998346 | Benzenoids                      | C8H6O35  | 88-99-34   | 166.0266 | 350.811  | 165.019073 |
| NEG00050 | 7748543.946 | 6873229.283 | -0.17294 | 0.047974 | 0.4632 | 1.25397 | phthalic acid                                                             | 32.998346 | Benzenoids                      | C8H6O36  | 88-99-35   | 166.0266 | 350.811  | 165.019073 |
| NEG00051 | 7748543.946 | 6873229.283 | -0.17294 | 0.047974 | 0.4632 | 1.25397 | phthalic acid                                                             | 33.998346 | Benzenoids                      | C8H6O37  | 88-99-36   | 166.0266 | 350.811  | 165.019073 |
| NEG00052 | 7748543.946 | 6873229.283 | -0.17294 | 0.047974 | 0.4632 | 1.25397 | phthalic acid                                                             | 34.998346 | Benzenoids                      | C8H6O38  | 88-99-37   | 166.0266 | 350.811  | 165.019073 |
| NEG00053 | 7748543.946 | 6873229.283 | -0.17294 | 0.047974 | 0.4632 | 1.25397 | phthalic acid                                                             | 35.998346 | Benzenoids                      | C8H6O39  | 88-99-38   | 166.0266 | 350.811  | 165.019073 |
| NEG00054 | 7748543.946 | 6873229.283 | -0.17294 | 0.047974 | 0.4632 | 1.25397 | phthalic acid                                                             | 36.998346 | Benzenoids                      | C8H6O40  | 88-99-39   | 166.0266 | 350.811  | 165.019073 |
| NEG00055 | 7748543.946 | 6873229.283 | -0.17294 | 0.047974 | 0.4632 | 1.25397 | phthalic acid                                                             | 37.998346 | Benzenoids                      | C8H6O41  | 88-99-40   | 166.0266 | 350.811  | 165.019073 |
| NEG00056 | 720671.278  | 908741.2682 | 0.334528 | 0.255226 | 0.6873 | 0.30122 | diethyl benzene-1,2-dicarboxylate                                         | 0.9359209 | Benzenoids                      | -        | -          | -        | 39.3605  | 220.097648 |
| NEG00057 | 1497896.218 | 1174787.456 | -0.35054 | 0.549491 | 0.8288 | 0.43826 | (Z)-2-methylbut-2-enedioic acid                                           | 0.9339745 | Lipids and lipid-like molecules | -        | -          | -        | 58.3179  | 128.023152 |
| NEG00058 | 2293995.08  | 2830701.541 | 0.303297 | 0.300693 | 0.7148 | 0.7369  | hexadecanoic acid                                                         | 0.9338981 | Lipids and lipid-like molecules | -        | -          | -        | 592.307  | 254.96077  |
| NEG00059 | 901788.4555 | 1071325.07  | 0.248535 | 0.374854 | 0.7432 | 0.23182 | 1H-pyrimidine-2,4-dione                                                   | 0.9313932 | Organoheterocyclic compounds    | -        | -          | -        | 82.3989  | 110.035946 |
| NEG00060 | 516584.2709 | 537109.8793 | 0.056214 | 0.753123 | 0.9161 | 0.06162 | 2,3-dihydroxypropanal                                                     | 0.9296528 | Organic oxygen compounds        | -        | -          | -        | 335.947  | 89.0243588 |
| NEG00061 | 2031173.636 | 1773266.207 | -0.1959  | 0.271873 | 0.6972 | 0.50852 | butanedioic acid                                                          | 0.9121644 | Organic acids and derivatives   | -        | -          | -        | 399.955  | 116.972427 |
| NEG00062 | 789919.2402 | 715585.9006 | -0.14258 | 0.422715 | 0.7668 | 0.23441 | 2,4,6-trihydroxy-5-[1-(4-hydroxy-1,1,4,7-tetramethyl-1a,2,3,4a,5,6,7a,7b- | 0.911528  | Lipids and lipid-like molecules | -        | -          | -        | 49.88235 | 470.407647 |
| NEG00063 | 858596.9976 | 1027008.072 | 0.258394 | 0.555663 | 0.83   | 0.31686 | Maslinic acid                                                             | 0.9067102 | Lipids and lipid-like molecules | -        | -          | -        | 55.1021  | 471.347357 |
| NEG00064 | 55627.12252 | 8725.64687  | -2.67245 | 0.069501 | 0.5218 | 0.22806 | Ursolic acid                                                              | 0.8973356 | Lipids and lipid-like molecules | C30H48O3 | 77-52-1    | 456.3604 | 24.2086  | 455.269882 |
| NEG00065 | 1232643.332 | 842363.6076 | -0.54924 | 0.005279 | 0.2039 | 0.77594 | Uracil                                                                    | 0.8929346 | Organoheterocyclic compounds    | C4H4N2O2 | 66-22-8    | 112.0273 | 156.5575 | 110.024693 |
| NEG00066 | 454406.1541 | 492011.7983 | 0.114711 | 0.599711 | 0.8475 | 0.16849 | Eicosapentaenoic acid                                                     | 0.8897453 | Lipids and lipid-like molecules | C20H30O2 | 10417-94-4 | 302.2246 | 56.3392  | 300.261974 |

|          |             |             |          |          |        |         |                                                         |           |                                  |            |           |          |            |            |            |
|----------|-------------|-------------|----------|----------|--------|---------|---------------------------------------------------------|-----------|----------------------------------|------------|-----------|----------|------------|------------|------------|
| NEG00067 | 5352784.434 | 4079433.36  | -0.39192 | 0.047831 | 0.4632 | 1.21813 | 16-Hydroxy hexadecanoic acid                            | 0.8835173 | Lipids and lipid-like molecules  | -          | -         | -        | 43.7192    | 270.251603 |            |
| NEG00068 | 7291453.234 | 10186764.93 | 0.482418 | 0.118313 | 0.5808 | 1.9636  | 2-methylidenebutanedioic acid                           | 0.8647198 | Lipids and lipid-like molecules  | -          | -         | -        | 72.3208    | 129.019358 |            |
| NEG00069 | 559789.6423 | 571470.629  | 0.029795 | 0.826322 | 0.9418 | 0.01613 | (10E,12Z)-hydroxyoctadeca-10,12-dienoic acid            | 0.8594035 | Lipids and lipid-like molecules  | -          | -         | -        | 79.81415   | 294.887877 |            |
| NEG00070 | 8280630.534 | 7884068.014 | -0.0708  | 0.406741 | 0.7584 | 0.66498 | phosphoric acid                                         | 0.8446242 | Homogeneous non-metal compounds  | H3O4P      | 7664-38-2 | 97.9769  | 420.873    | 96.9600399 |            |
| NEG00071 | 238818.0789 | 213212.6962 | -0.16362 | 0.311922 | 0.7182 | 0.13107 | 3alpha-Acetoxy-11-keto-beta-boswellic acid              | 0.8439695 | Lipids and lipid-like molecules  | -          | -         | -        | 35.37055   | 510.488616 |            |
| NEG00072 | 1767379.73  | 1664964.759 | -0.08612 | 0.242865 | 0.6822 | 0.37323 | 3-(3,4-Dihydroxy-5-methoxy)-2-propenoic acid            | 0.8396842 | Phenylpropanoids and polyketides | -          | -         | -        | 121.417    | 208.061442 |            |
| NEG00073 | 4004750.693 | 3564538.118 | -0.168   | 0.38553  | 0.7481 | 0.55513 | 4-methyl-2-oxopentanoic acid                            | 0.8374843 | Organic acids and derivatives    | -          | -         | -        | 39.6575    | 129.055711 |            |
| NEG00074 | 561900.2752 | 406302.726  | -0.46776 | 0.303121 | 0.7152 | 0.46349 | 5-oxohexanoic acid                                      | 0.8303547 | Lipids and lipid-like molecules  | -          | -         | -        | 228.714    | 129.975674 |            |
| NEG00075 | 269968.5034 | 272262.3827 | 0.012207 | 0.932055 | 0.9771 | 0.01913 | Ethyl stearate                                          | 0.8295794 | Lipids and lipid-like molecules  | -          | -         | -        | 22.14015   | 310.602357 |            |
| NEG00076 | 2007325.331 | 1495846.877 | -0.42431 | 0.023393 | 0.3593 | 0.94771 | 2-hydroxy-3-methylbutanoic acid                         | 0.8281741 | Lipids and lipid-like molecules  | -          | -         | -        | 182.771    | 116.972365 |            |
| NEG00077 | 448574.6216 | 392955.9445 | -0.19098 | 0.218361 | 0.6668 | 0.25575 | octadecanoic acid                                       | 0.8204428 | Lipids and lipid-like molecules  | -          | -         | -        | 161.233    | 282.777322 |            |
| NEG00078 | 51008.96212 | 72597.71537 | 0.509173 | 0.091802 | 0.5568 | 0.15531 | 3-Methyl-2-oxovaleric acid                              | 0.7979585 | Organic acids and derivatives    | -          | -         | -        | 346.282    | 129.97538  |            |
| NEG00079 | 575009.3479 | 613807.6007 | 0.094201 | 0.579904 | 0.8394 | 0.08268 | 2-methylpentanedioic acid                               | 0.7743043 | Lipids and lipid-like molecules  | -          | -         | -        | 692.5805   | 145.014083 |            |
| NEG00080 | 5309637.116 | 5031713.384 | -0.07756 | 0.898939 | 0.967  | 0.01116 | Cholesterol sulfate                                     | 0.6602492 | Lipids and lipid-like molecules  | -          | -         | -        | 26.49365   | 465.303663 |            |
| NEG00081 | 5594781.6   | 6464977.005 | 0.208563 | 0.327838 | 0.721  | 0.7674  | 12-Oxo-2,3-dinor-10,15-phytodienoic acid                | 0.5969691 | Lipids and lipid-like molecules  | -          | -         | -        | 29.31965   | 262.988664 |            |
| NEG00082 | 3245138.765 | 2630448.321 | -0.30297 | 0.342031 | 0.7298 | 0.64089 | Monomethyl glutaric acid                                | 0.5241198 | Lipids and lipid-like molecules  | -          | -         | -        | 149.899    | 144.066463 |            |
| NEG00083 | 381032.4079 | 388744.5409 | 0.028909 | 0.909238 | 0.9701 | 0.03091 | Sulfaphenazole                                          | 0.4721622 | Organoheterocyclic compounds     | :15H14N4O2 | 526-08-9  | 314.0838 | 16.65775   | 312.898456 |            |
| NEG00084 | 462575.6708 | 1133539.888 | 1.293074 | 0.247149 | 0.6846 | 0.75059 | (1R,2S,3S,4R,5R)-9,8-dioxabicyclo[3.2.1]octane-2,3-diol | 0.4543707 | Organoheterocyclic compounds     | -          | -         | -        | 270.707    | 160.841868 |            |
| NEG00124 | 2400674.483 | 1           | -21.195  | 0.014054 | 0.3053 | 2.01666 |                                                         |           | Glyoxylate                       |            |           |          | 16.670319  | 720.388    | 73.0294576 |
| NEG00133 | 600927.2892 | 662231.78   | 0.140146 | 0.449887 | 0.7801 | 0.13527 |                                                         |           | 5-Hydroxyisourate                |            |           |          | 0.4049876  | 719.1115   | 183.102498 |
| NEG00135 | 156203.1226 | 1           | -17.2531 | 0.051641 | 0.4801 | 0.42723 |                                                         |           | Stipitatote                      |            |           |          | -16.517275 | 718.9965   | 207.113786 |
| NEG00147 | 235285.7855 | 206169.3746 | -0.19058 | 0.136932 | 0.6016 | 0.20526 |                                                         |           | Sodium arsenite                  |            |           |          | -10.434116 | 717.437    | 128.901568 |

|          |             |             |          |          |        |         |                                                                             |            |   |   |   |          |            |
|----------|-------------|-------------|----------|----------|--------|---------|-----------------------------------------------------------------------------|------------|---|---|---|----------|------------|
| NEG00157 | 799466.2813 | 936098.7166 | 0.227623 | 0.634689 | 0.8653 | 0.15623 | Fosetyl                                                                     | -8.6539349 | - | - | - | 716.746  | 109.040671 |
| NEG00163 | 2437016.097 | 1631687.982 | -0.57875 | 0.285311 | 0.7027 | 0.88252 | sn-Glycerol 3-phosphate                                                     | -0.2502303 | - | - | - | 715.68   | 171.06638  |
| NEG00164 | 1633627.727 | 1           | -20.6396 | 0.080196 | 0.5369 | 1.57943 | Cacodylate                                                                  | 7.3931115  | - | - | - | 715.515  | 136.991144 |
| NEG00178 | 208182.9736 | 144417.0424 | -0.52761 | 0.172159 | 0.631  | 0.25376 | 3-Phospho-D-glycerate                                                       | -24.576299 | - | - | - | 714.2955 | 185.045351 |
| NEG00185 | 924689.5834 | 696688.2751 | -0.40846 | 0.299118 | 0.7148 | 0.48    | Glyphosate                                                                  | 3.7884079  | - | - | - | 713.381  | 168.066464 |
| NEG00190 | 1368646.007 | 1267225.173 | -0.11108 | 0.496571 | 0.8016 | 0.3366  | $\Delta,4$ -<br>Dioxotetrahydropyrimidin<br>a D-ribomelastide               | -18.427112 | - | - | - | 712.731  | 325.183913 |
| NEG00217 | 879944.1852 | 826942.5829 | -0.08962 | 0.301657 | 0.7148 | 0.2367  | Arsenobetaine                                                               | 9.5748048  | - | - | - | 709.603  | 177.055628 |
| NEG00224 | 833838.4385 | 788989.7147 | -0.07976 | 0.703671 | 0.8994 | 0.1759  | 5-Nitrofurfural                                                             | -19.068012 | - | - | - | 708.906  | 140.071633 |
| NEG00247 | 842928.6209 | 664139.5216 | -0.34392 | 0.61481  | 0.8559 | 0.43304 | Haloxydine                                                                  | 12.152192  | - | - | - | 705.6405 | 198.965453 |
| NEG00253 | 1915168.187 | 2111702.972 | 0.140936 | 0.588548 | 0.8421 | 0.1428  | (1S,3R)-5-( $\Delta,2$ -<br>Dichloroethenyl)-2,2-<br>dimethylpropanoic acid | -5.5036196 | - | - | - | 704.8905 | 208.061373 |
| NEG00254 | 3172536.658 | 3317050.107 | 0.064264 | 0.89028  | 0.9634 | 0.01339 | Dihydrogen phosphate                                                        | 2.2622158  | - | - | - | 704.8295 | 95.9801428 |
| NEG00269 | 125458.7442 | 127409.7676 | 0.022263 | 0.948507 | 0.983  | 0.02402 | 5-(( $\Delta E$ )-4-amino-4-<br>oxobut-2-enyl)amino)-L-<br>alanina          | 3.9279841  | - | - | - | 702.6175 | 200.173414 |
| NEG00281 | 1067587.808 | 1374928.189 | 0.365002 | 0.313881 | 0.7189 | 0.46878 | Tetranitromethane                                                           | 21.419463  | - | - | - | 701.237  | 195.029622 |
| NEG00290 | 3137546.279 | 1830269.134 | -0.77758 | 0.207726 | 0.6619 | 1.08452 | L-Selenocysteine                                                            | 0.6443561  | - | - | - | 699.836  | 167.046032 |
| NEG00311 | 269703.4638 | 228282.3351 | -0.24055 | 0.531215 | 0.8206 | 0.1339  | 3-Phospho-D-glycerate                                                       | -24.553806 | - | - | - | 697.794  | 185.045355 |
| NEG00317 | 277396.1813 | 203754.4519 | -0.44512 | 0.130542 | 0.5935 | 0.25415 | 1,1-Dichloroethylene<br>epoxide                                             | 18.166084  | - | - | - | 696.9135 | 111.937475 |
| NEG00324 | 1914141.165 | 1883908.259 | -0.02297 | 0.965923 | 0.9898 | 0.04646 | sn-Glycerol 3-phosphate                                                     | -0.419123  | - | - | - | 696.098  | 171.066351 |
| NEG00343 | 1282997.556 | 886446.6881 | -0.53341 | 0.309959 | 0.7168 | 0.65628 | Fosetyl                                                                     | -8.649131  | - | - | - | 693.608  | 109.040672 |
| NEG00352 | 209386.7543 | 392975.1103 | 0.908268 | 0.06934  | 0.5213 | 0.49443 | Sodium arsenite                                                             | -10.502073 | - | - | - | 692.225  | 128.901559 |
| NEG00375 | 1061890.82  | 896641.6749 | -0.24403 | 0.301069 | 0.7148 | 0.37016 | $\Delta,4$ -<br>Dioxotetrahydropyrimidin<br>a D-ribomelastide               | -18.447314 | - | - | - | 689.429  | 325.183906 |
| NEG00390 | 1476005.965 | 1296366.43  | -0.18722 | 0.409009 | 0.7599 | 0.32021 | Glyphosate                                                                  | 3.7765277  | - | - | - | 687.332  | 168.066462 |
| NEG00397 | 303550.0618 | 295244.7482 | -0.04002 | 0.790971 | 0.9281 | 0.07806 | Etobenzanid                                                                 | 16.195722  | - | - | - | 686.627  | 339.199433 |
| NEG00406 | 388691.8474 | 361201.2828 | -0.10582 | 0.252217 | 0.6865 | 0.1752  | O-Phospho-L-serine                                                          | -20.639101 | - | - | - | 685.38   | 184.061404 |

|          |             |             |           |          |        |         |                                                                     |            |   |   |   |          |            |
|----------|-------------|-------------|-----------|----------|--------|---------|---------------------------------------------------------------------|------------|---|---|---|----------|------------|
| NEG00409 | 2731969.134 | 2244145.628 | -0.28377  | 0.522556 | 0.8155 | 0.69182 | (1S,3R)-3-(2,2-Dichloroethenyl)-2,2-dimethylcyclopropanecarboxylate | -5.497291  | - | - | - | 684.187  | 208.061374 |
| NEG00412 | 4737148.178 | 3571462.202 | -0.4075   | 0.226842 | 0.671  | 1.22299 | Dihydrogen phosphate                                                | 2.2636058  | - | - | - | 683.984  | 95.9801429 |
| NEG00417 | 860519.2916 | 634075.0794 | -0.44055  | 0.099163 | 0.5601 | 0.50012 | 3-(Phosphoacetylamido)-L-alanine                                    | 10.854127  | - | - | - | 683.2795 | 241.119151 |
| NEG00434 | 904759.1976 | 761265.0333 | -0.24914  | 0.227123 | 0.671  | 0.37171 | 5-Nitrofurfural                                                     | -19.110834 | - | - | - | 680.1235 | 140.071627 |
| NEG00441 | 215849.1073 | 200999.2368 | -0.10283  | 0.463336 | 0.7842 | 0.12151 | 3-Phospho-D-glycerate                                               | -24.539576 | - | - | - | 677.6825 | 185.045358 |
| NEG00450 | 1084507.521 | 973697.5744 | -0.15549  | 0.619706 | 0.858  | 0.25763 | Haloxydine                                                          | 12.080322  | - | - | - | 675.7    | 198.965439 |
| NEG00480 | 2431441.601 | 2225444.407 | -0.12772  | 0.594494 | 0.8453 | 0.33    | L-Selenocysteine                                                    | 0.5673143  | - | - | - | 670.935  | 167.046019 |
| NEG00496 | 322952.1774 | 322938.7872 | -5.98E-05 | 0.999776 | 1      | 0.05855 | Sodium arsenite                                                     | -10.428644 | - | - | - | 668.009  | 128.901569 |
| NEG00504 | 889510.0049 | 882764.5008 | -0.01098  | 0.939162 | 0.9796 | 0.06848 | Tetranitromethane                                                   | 21.506426  | - | - | - | 666.335  | 195.029639 |
| NEG00507 | 677685.3059 | 631007.1534 | -0.10296  | 0.68427  | 0.8892 | 0.11308 | O-Phosphorylhydroxylamine                                           | 12.970634  | - | - | - | 665.7775 | 112.003989 |
| NEG00517 | 6088487.41  | 4998384.904 | -0.28462  | 0.278634 | 0.6999 | 0.84529 | Dihydrogen phosphate                                                | 2.1702359  | - | - | - | 665.0145 | 95.9801339 |
| NEG00531 | 1307975.175 | 1436446.006 | 0.135169  | 0.55321  | 0.8299 | 0.18947 | 2,4-Dioxotetrahydropyrimidine D-ribonucleotide                      | -18.567494 | - | - | - | 663.714  | 325.183867 |
| NEG00540 | 1150537.862 | 1075400.211 | -0.09743  | 0.235104 | 0.6796 | 0.28351 | Glyphosate                                                          | 3.7851323  | - | - | - | 662.47   | 168.066463 |
| NEG00550 | 3210551.791 | 1455239.305 | -1.14156  | 0.004116 | 0.1825 | 1.79229 | (1S,3R)-3-(2,2-Dichloroethenyl)-2,2-dimethylcyclopropanecarboxylate | -5.5912467 | - | - | - | 660.571  | 208.061354 |
| NEG00554 | 2294911.327 | 2180825.285 | -0.07356  | 0.876771 | 0.9578 | 0.30754 | Fosetyl                                                             | -8.8124446 | - | - | - | 659.971  | 109.040654 |
| NEG00578 | 382598.4561 | 382913.2405 | 0.001186  | 0.995141 | 0.9986 | 0.00386 | Etobenzanid                                                         | 16.074886  | - | - | - | 652.328  | 339.199392 |
| NEG00597 | 333198.3538 | 387145.4777 | 0.216495  | 0.316982 | 0.7189 | 0.15461 | Sodium arsenite                                                     | -10.689198 | - | - | - | 649.395  | 128.901535 |
| NEG00598 | 866738.3683 | 1421080.85  | 0.71332   | 0.261253 | 0.6905 | 0.83532 | Haloxydine                                                          | 12.010502  | - | - | - | 649.218  | 198.965425 |
| NEG00605 | 809769.5041 | 738467.8534 | -0.13298  | 0.383421 | 0.7477 | 0.23676 | Tetranitromethane                                                   | 21.418638  | - | - | - | 647.9765 | 195.029622 |
| NEG00606 | 2024649.156 | 1846547.295 | -0.13284  | 0.804996 | 0.9327 | 0.16053 | Iodide                                                              | 21.051651  | - | - | - | 647.823  | 125.899895 |
| NEG00615 | 4174359.632 | 4108370.552 | -0.02299  | 0.873549 | 0.9572 | 0.12533 | Tetrafluoroethylene                                                 | -14.069229 | - | - | - | 646.121  | 99.0063163 |

|          |             |             |          |          |        |         |  |                                                                     |            |   |   |   |          |            |
|----------|-------------|-------------|----------|----------|--------|---------|--|---------------------------------------------------------------------|------------|---|---|---|----------|------------|
| NEG00661 | 6162200.135 | 11414431.09 | 0.889342 | 0.205201 | 0.6619 | 2.01769 |  | Dihydrogen phosphate                                                | 1.9903731  | - | - | - | 640.839  | 95.9801164 |
| NEG00689 | 3391986.855 | 1920076.807 | -0.82097 | 0.314865 | 0.7189 | 1.17091 |  | 3-(Phosphoacetylamido)-L-alanine                                    | 10.691272  | - | - | - | 631.4275 | 241.119112 |
| NEG00698 | 1041336.383 | 454592.1864 | -1.19579 | 0.269889 | 0.696  | 0.77451 |  | Glyphosate                                                          | 3.4828444  | - | - | - | 628.739  | 168.066412 |
| NEG00708 | 685761.9279 | 708602.2852 | 0.047268 | 0.788383 | 0.9278 | 0.01827 |  | Tetranitromethane                                                   | 21.277885  | - | - | - | 627.658  | 195.029595 |
| NEG00719 | 900275.28   | 1057557.555 | 0.232298 | 0.464761 | 0.7856 | 0.3465  |  | (1S,3R)-3-(2,2-Dichloroethenyl)-2,2-dimethylcyclopropanecarboxylate | -5.589067  | - | - | - | 626.948  | 208.061355 |
| NEG00729 | 4520929.45  | 4777004.837 | 0.079487 | 0.789865 | 0.928  | 0.31914 |  | sn-Glycerol 3-phosphate                                             | -1.3430395 | - | - | - | 626.433  | 171.066192 |
| NEG00737 | 1077101.613 | 1218026.389 | 0.177391 | 0.627957 | 0.8612 | 0.1573  |  | Haloxydine                                                          | 11.873139  | - | - | - | 626.1115 | 198.965398 |
| NEG00746 | 5883588.64  | 6223109.135 | 0.080939 | 0.726858 | 0.907  | 0.38475 |  | Cacodylate                                                          | 6.8020745  | - | - | - | 625.605  | 136.991062 |
| NEG00764 | 564366.7126 | 607575.5545 | 0.106431 | 0.575387 | 0.8382 | 0.18626 |  | 2,6-Dichloroindophenol                                              | 7.2840265  | - | - | - | 624.68   | 267.090176 |
| NEG00769 | 166648.5219 | 156284.1844 | -0.09264 | 0.703834 | 0.8994 | 0.05941 |  | Chrysoeriol                                                         | 10.082617  | - | - | - | 624.572  | 299.258651 |
| NEG00775 | 2460391.479 | 1998793.276 | -0.29976 | 0.076669 | 0.5283 | 0.84782 |  | Selenium Sulfide                                                    | 17.530747  | - | - | - | 624.2405 | 110.02467  |
| NEG00784 | 673870.5756 | 668952.9237 | -0.01057 | 0.980777 | 0.9946 | 0.11112 |  | Sodium arsenite                                                     | -10.750336 | - | - | - | 624.148  | 128.901527 |
| NEG00787 | 1408044.629 | 1647445.595 | 0.226538 | 0.414477 | 0.7624 | 0.49075 |  | Bromobenzene                                                        | 3.8992417  | - | - | - | 624.0635 | 156.001236 |
| NEG00788 | 166095.9689 | 187573.3917 | 0.175438 | 0.566393 | 0.8339 | 0.10035 |  | 2,4-DB                                                              | -13.909504 | - | - | - | 624.057  | 248.079859 |
| NEG00790 | 7443710.226 | 6687903.546 | -0.15447 | 0.254359 | 0.6868 | 0.94301 |  | Tetrafluoroethylene                                                 | -14.257097 | - | - | - | 623.981  | 99.0062975 |
| NEG00793 | 40205697.83 | 16563554.6  | -1.27939 | 0.001186 | 0.0993 | 6.20035 |  | Dihydrogen phosphate                                                | 1.8512686  | - | - | - | 623.884  | 95.9801029 |
| NEG00796 | 828796.4498 | 1063455.253 | 0.35967  | 0.32369  | 0.7192 | 0.33423 |  | O-Phosphorylhydroxylamine                                           | 12.719196  | - | - | - | 623.803  | 112.003961 |
| NEG00806 | 1357460.75  | 1480874.867 | 0.125539 | 0.551753 | 0.8296 | 0.15572 |  | 1,1-Dichloroethylene epoxide                                        | 17.765504  | - | - | - | 623.2015 | 111.93743  |
| NEG00825 | 824047.9692 | 574180.1332 | -0.52122 | 0.227525 | 0.6711 | 0.48351 |  | Potassium dichromate                                                | -7.6226812 | - | - | - | 622.021  | 293.175081 |
| NEG00850 | 4981252.675 | 4258815.63  | -0.22606 | 0.168177 | 0.6293 | 0.88902 |  | 2,4-Dioxotetrahydropyrimidine D-ribonucleotide                      | -18.706105 | - | - | - | 620.949  | 325.183822 |
| NEG00852 | 716258.7567 | 635508.0177 | -0.17257 | 0.877342 | 0.9578 | 0.02516 |  | Radon-222                                                           | 13.747398  | - | - | - | 620.862  | 220.995775 |
| NEG00865 | 3377368.38  | 3061792.698 | -0.14152 | 0.218409 | 0.6668 | 0.60174 |  | 3-(Dichloromethylene)-2,5-pyrrolidinedione                          | 10.296895  | - | - | - | 619.819  | 178.983577 |

|          |             |             |          |          |        |         |                                                                                                                 |            |   |   |   |          |            |
|----------|-------------|-------------|----------|----------|--------|---------|-----------------------------------------------------------------------------------------------------------------|------------|---|---|---|----------|------------|
| NEG00873 | 1814349.931 | 1865482.01  | 0.040096 | 0.864062 | 0.9547 | 0.03901 | Etobenzanid                                                                                                     | 15.8106    | - | - | - | 619.64   | 339.199302 |
| NEG00901 | 581597.1001 | 608925.0834 | 0.066245 | 0.814104 | 0.9354 | 0.06817 | Ferrous lactate                                                                                                 | 4.7788572  | - | - | - | 618.496  | 232.978842 |
| NEG00938 | 415109.577  | 377948.3462 | -0.1353  | 0.268836 | 0.6957 | 0.2095  | Eschscholtzanthin                                                                                               | -21.34966  | - | - | - | 616.047  | 565.836221 |
| NEG00955 | 155078.02   | 205821.3927 | 0.408399 | 0.011902 | 0.2843 | 0.30609 | Flumiclorac pentyl                                                                                              | 20.840156  | - | - | - | 614.967  | 422.863957 |
| NEG00957 | 83924.51959 | 117938.7774 | 0.490874 | 0.042363 | 0.4426 | 0.21177 | 4-Hydroxy-16,18-tritriacontanedione                                                                             | -22.335434 | - | - | - | 614.964  | 507.840858 |
| NEG00959 | 3117946.297 | 3073028.476 | -0.02093 | 0.86613  | 0.9555 | 0.18599 | Pancuronium                                                                                                     | -2.6411956 | - | - | - | 614.9545 | 571.85311  |
| NEG00964 | 913840.4078 | 857503.7415 | -0.0918  | 0.252552 | 0.6865 | 0.2729  | Butter acids                                                                                                    | 19.719592  | - | - | - | 614.624  | 502.849659 |
| NEG00965 | 343012.3919 | 280611.9048 | -0.28968 | 0.081472 | 0.5377 | 0.28487 | Dihydro-alpha-ergocryptine mesylate                                                                             | -11.850417 | - | - | - | 614.622  | 672.804738 |
| NEG00966 | 720850.5772 | 646163.8212 | -0.1578  | 0.352506 | 0.7326 | 0.26429 | Neoarctin A                                                                                                     | 11.160761  | - | - | - | 614.622  | 741.808414 |
| NEG00967 | 789695.0183 | 906719.2124 | 0.19936  | 0.593921 | 0.8453 | 0.22084 | Terodiline hydrochloride                                                                                        | 2.5462387  | - | - | - | 614.613  | 316.889533 |
| NEG00990 | 388839.3724 | 390134.2404 | 0.004796 | 0.978131 | 0.994  | 0.06157 | 1-(4-(4-chloro-5-methyl-2-isothiazolyl)-N-methyl-2-[p-[(alpha,alpha,alpha-trifluoro-p-tolyl)oxy]phenyl]acetamid | 24.767868  | - | - | - | 613.959  | 439.870143 |
| NEG01011 | 825301.1384 | 734845.4602 | -0.16748 | 0.580713 | 0.8399 | 0.06279 | cis-Chlorobenzene dihydrodiol                                                                                   | -22.717441 | - | - | - | 613.1495 | 248.893846 |
| NEG01013 | 341049.9821 | 338534.9194 | -0.01068 | 0.970251 | 0.9915 | 0.03566 | 2,4-Dibromophenol                                                                                               | -18.456007 | - | - | - | 612.988  | 250.891474 |
| NEG01016 | 2245419.984 | 904517.2426 | -1.31177 | 0.011685 | 0.2819 | 1.44079 | Iodide                                                                                                          | 21.961282  | - | - | - | 612.432  | 125.90001  |
| NEG01029 | 729255.6607 | 2288559.628 | 1.649943 | 0.13534  | 0.5997 | 1.3007  | Nornitrogen mustard                                                                                             | 4.4785009  | - | - | - | 611.643  | 141.020359 |
| NEG01034 | 107480.9134 | 82237.69368 | -0.38621 | 0.160974 | 0.6224 | 0.18454 | Oleanoic acid 3-O-glucuronide                                                                                   | -12.360672 | - | - | - | 611.27   | 631.809301 |
| NEG01044 | 468654.7449 | 367081.9401 | -0.35242 | 0.14939  | 0.6145 | 0.38158 | 2,3,23-Triacetylsericic acid                                                                                    | 16.547727  | - | - | - | 610.7085 | 629.811762 |
| NEG01045 | 1074052.432 | 1214293.688 | 0.177053 | 0.492101 | 0.8004 | 0.19032 | 2-Bromoacetaldehyde                                                                                             | 21.465752  | - | - | - | 610.5095 | 121.943963 |
| NEG01051 | 1204809.301 | 1028021.337 | -0.22893 | 0.280124 | 0.7002 | 0.46775 | Anhydrochlortetracycline                                                                                        | -0.4630491 | - | - | - | 610.156  | 459.85681  |
| NEG01053 | 479190.7142 | 419525.4582 | -0.19184 | 0.524117 | 0.8163 | 0.23438 | Reduced haloperidol                                                                                             | 8.1335199  | - | - | - | 609.765  | 376.875797 |
| NEG01063 | 88424.18899 | 71674.74281 | -0.30298 | 0.483088 | 0.7977 | 0.12108 | Janthitrem E                                                                                                    | 20.583074  | - | - | - | 608.984  | 602.793251 |
| NEG01075 | 117574.8297 | 108939.279  | -0.11006 | 0.769327 | 0.9221 | 0.07305 | 2-Hexaprenyl-6-hydroxyphenol                                                                                    | 19.187263  | - | - | - | 608.216  | 517.815478 |



|          |             |             |          |          |        |         |                                              |            |   |   |   |          |            |
|----------|-------------|-------------|----------|----------|--------|---------|----------------------------------------------|------------|---|---|---|----------|------------|
| NEG01089 | 93559.083   | 75158.8744  | -0.31593 | 0.062855 | 0.5039 | 0.17132 | Eupachlorin acetate                          | -9.4949443 | - | - | - | 607.2295 | 453.886404 |
| NEG01093 | 65539.94998 | 68538.9829  | 0.06455  | 0.771659 | 0.9221 | 0.00244 | 4-Hydroxy-16,18-tritriacontanedione          | 19.26402   | - | - | - | 606.207  | 507.862026 |
| NEG01094 | 141812.8258 | 151856.143  | 0.098717 | 0.698187 | 0.8974 | 0.05036 | Muricadienin                                 | -10.331921 | - | - | - | 606.1465 | 513.853004 |
| NEG01096 | 766921.4241 | 706679.0228 | -0.11802 | 0.263632 | 0.6922 | 0.28778 | beta-2,3,5,6-Tetrachloro-1,4-cyclohexanediol | -4.8610502 | - | - | - | 605.077  | 252.929989 |
| NEG01099 | 113299.0523 | 111983.0901 | -0.01685 | 0.930129 | 0.9764 | 0.03226 | Pyridate                                     | -23.825701 | - | - | - | 604.855  | 377.899795 |
| NEG01131 | 1665000.973 | 1638811.62  | -0.02287 | 0.806083 | 0.9332 | 0.0697  | Dihydrogen phosphate                         | 2.3022756  | - | - | - | 601.526  | 95.9801467 |
| NEG01145 | 450651.6893 | 586176.1968 | 0.379322 | 0.585618 | 0.8418 | 0.17681 | Sodium molybdate                             | 16.368012  | - | - | - | 600.2435 | 204.913194 |
| NEG01148 | 796590.5692 | 763098.5323 | -0.06197 | 0.475956 | 0.7932 | 0.19257 | Haloxydine                                   | 12.260672  | - | - | - | 599.996  | 198.965475 |
| NEG01164 | 99218.11582 | 92801.34527 | -0.09646 | 0.737426 | 0.9119 | 0.07688 | Pyrimidifen                                  | 14.809852  | - | - | - | 598.4085 | 376.90652  |
| NEG01174 | 307168.5461 | 313196.044  | 0.028035 | 0.867284 | 0.9556 | 0.009   | Fenvalerate                                  | 18.823309  | - | - | - | 597.8245 | 418.900727 |
| NEG01209 | 2912636.379 | 2230112.304 | -0.38521 | 0.266058 | 0.6938 | 0.70055 | 2-Bromoacetaldehyde                          | 21.870623  | - | - | - | 593.749  | 121.944012 |
| NEG01238 | 192938.889  | 157968.4926 | -0.28851 | 0.15307  | 0.6159 | 0.21497 | 2,3,7,8-Tetrachlorodibenzodioxin             | 21.788445  | - | - | - | 591.906  | 320.970739 |
| NEG01252 | 3565124.066 | 3254745.009 | -0.13141 | 0.457403 | 0.7822 | 0.49034 | Cryolite                                     | 1.9298855  | - | - | - | 591.215  | 208.934429 |
| NEG01258 | 4731712.356 | 4560794.669 | -0.05308 | 0.747593 | 0.9146 | 0.39777 | Tetrafluoroethylene                          | -13.877738 | - | - | - | 590.9275 | 99.0063354 |
| NEG01290 | 583059.7461 | 559528.4102 | -0.05943 | 0.607448 | 0.8516 | 0.13064 | 3-(Dichloromethylene)-2,5-pyrrolidinedione   | 10.291819  | - | - | - | 587.95   | 178.983576 |
| NEG01294 | 300379.2505 | 285313.7431 | -0.07424 | 0.714604 | 0.9033 | 0.10269 | Glyburide                                    | -12.856588 | - | - | - | 587.437  | 492.989872 |
| NEG01298 | 595245.8048 | 479981.9087 | -0.31051 | 0.301238 | 0.7148 | 0.34076 | 2,5-Dichloro-4-oxohex-2-enedioate            | 10.895926  | - | - | - | 587.198  | 225.994197 |
| NEG01300 | 859939.2303 | 517932.9469 | -0.73147 | 0.084135 | 0.5411 | 0.62742 | Ferrous lactate                              | 4.9180503  | - | - | - | 587.127  | 232.978874 |
| NEG01302 | 687757.6103 | 638218.047  | -0.10785 | 0.566388 | 0.8339 | 0.20895 | YC 170                                       | 5.9296932  | - | - | - | 587.102  | 486.972917 |
| NEG01313 | 715135.1579 | 739265.3925 | 0.047876 | 0.875891 | 0.9578 | 0.04419 | Butefine hydrochloride                       | 21.730054  | - | - | - | 586.5465 | 352.928514 |
| NEG01316 | 175662.7804 | 157113.1886 | -0.161   | 0.50146  | 0.8029 | 0.12574 | Novclobiocin 105                             | 15.196213  | - | - | - | 586.413  | 574.992976 |
| NEG01322 | 297378.6571 | 269958.4277 | -0.13956 | 0.704638 | 0.8995 | 0.15571 | Tetrachlorvinphos                            | 16.016854  | - | - | - | 585.93   | 364.960385 |
| NEG01328 | 159455.7055 | 152258.6437 | -0.06663 | 0.75726  | 0.918  | 0.07967 | 3,5-Dichloro-2-methylmucote                  | 19.335646  | - | - | - | 585.644  | 224.023174 |

|          |             |             |          |          |        |         |  |                                                                            |            |   |   |   |          |            |
|----------|-------------|-------------|----------|----------|--------|---------|--|----------------------------------------------------------------------------|------------|---|---|---|----------|------------|
| NEG01329 | 74872.02848 | 75719.703   | 0.016242 | 0.935645 | 0.9788 | 0.02037 |  | 7-Epizucchini factor A                                                     | 7.3963963  | - | - | - | 585.452  | 680.940767 |
| NEG01359 | 7046820.698 | 6786042.318 | -0.0544  | 0.755283 | 0.9171 | 0.276   |  | 6-Oxo-2-hydroxy-7-(4'-chlorophenyl)-3,8,8-trichloroocta-2E,4E,7E-trienoate | -18.178126 | - | - | - | 582.711  | 381.008679 |
| NEG01375 | 2741495.588 | 4007928.487 | 0.547894 | 0.257704 | 0.6898 | 0.91763 |  | Iodide                                                                     | 21.71685   | - | - | - | 580.535  | 125.899979 |
| NEG01410 | 1275757.205 | 1621809.711 | 0.346251 | 0.270456 | 0.6967 | 0.60736 |  | Hydroxyzine                                                                | -0.0024147 | - | - | - | 576.0275 | 373.897022 |
| NEG01411 | 1112128.141 | 1244662.753 | 0.162432 | 0.626169 | 0.8602 | 0.1912  |  | Mazaticol hydrochloride                                                    | -23.958757 | - | - | - | 575.96   | 441.017033 |
| NEG01419 | 9637155.664 | 8912766.479 | -0.11273 | 0.247404 | 0.6846 | 1.01046 |  | Radon-222                                                                  | 12.629076  | - | - | - | 575.252  | 220.995527 |
| NEG01420 | 1003409.691 | 845768.1195 | -0.24658 | 0.491201 | 0.7998 | 0.38013 |  | PE-NMe(14:1(9Z)/20:5(5Z,8Z,11Z,14Z,17Z))                                   | -2.0348798 | - | - | - | 575.094  | 720.948254 |
| NEG01441 | 1645298.471 | 1795517.203 | 0.12605  | 0.470114 | 0.7898 | 0.26448 |  | Iodide                                                                     | 21.465982  | - | - | - | 558.5725 | 125.899948 |
| NEG01449 | 2708692.783 | 3193771.785 | 0.237664 | 0.503412 | 0.8042 | 0.48321 |  | o-Oxo-2-nyaroxy-7-(4'-chlorophenyl)-3,8,8-trichloroocta-2E,4E,7E-trienoate | -18.255393 | - | - | - | 550.3575 | 381.008649 |
| NEG01471 | 3063396.267 | 2656163.031 | -0.20579 | 0.406685 | 0.7584 | 0.55518 |  | o-Oxo-2-nyaroxy-7-(4'-chlorophenyl)-3,8,8-trichloroocta-2E,4E,7E-trienoate | -18.243327 | - | - | - | 524.481  | 381.008654 |
| NEG01473 | 1884323.937 | 2418338.081 | 0.359969 | 0.371476 | 0.7415 | 0.64718 |  | Iodide                                                                     | 21.582365  | - | - | - | 522.883  | 125.899962 |
| NEG01490 | 2562032.422 | 3591827.081 | 0.487429 | 0.20153  | 0.6597 | 0.78234 |  | o-Oxo-2-nyaroxy-7-(4'-chlorophenyl)-3,8,8-trichloroocta-2E,4E,7E-trienoate | -18.212735 | - | - | - | 503.83   | 381.008666 |
| NEG01501 | 65044.30221 | 52231.37651 | -0.31651 | 0.030675 | 0.3949 | 0.14452 |  | Tetrachlorobisphenol A                                                     | -16.26664  | - | - | - | 495.907  | 365.053369 |
| NEG01516 | 3164614.817 | 2224818.001 | -0.50834 | 0.350967 | 0.7323 | 0.81144 |  | Iodide                                                                     | 21.701384  | - | - | - | 481.6905 | 125.899977 |
| NEG01520 | 5564523.272 | 5091610.655 | -0.12814 | 0.131876 | 0.5958 | 0.86911 |  | Radon-222                                                                  | 12.537136  | - | - | - | 480.286  | 220.995507 |
| NEG01535 | 3211022.181 | 2900158.261 | -0.1469  | 0.775756 | 0.9235 | 0.47132 |  | o-Oxo-2-nyaroxy-7-(4'-chlorophenyl)-3,8,8-trichloroocta-2E,4E,7E-trienoate | -18.148196 | - | - | - | 474.521  | 381.00869  |
| NEG01537 | 508030.7501 | 455762.3836 | -0.15663 | 0.656211 | 0.8753 | 0.10006 |  | 2-Bromoacetaldehyde                                                        | 21.784963  | - | - | - | 471.098  | 121.944002 |
| NEG01545 | 1285861.487 | 1272229.962 | -0.01538 | 0.843738 | 0.9483 | 0.10609 |  | Iodide                                                                     | 21.998634  | - | - | - | 452.8215 | 125.900015 |
| NEG01560 | 7561678.637 | 6553232.107 | -0.2065  | 0.685389 | 0.8899 | 0.79423 |  | o-Oxo-2-nyaroxy-7-(4'-chlorophenyl)-3,8,8-trichloroocta-2E,4E,7E-trienoate | -18.114583 | - | - | - | 442.025  | 381.008703 |
| NEG01578 | 1352946.568 | 1272863.956 | -0.08803 | 0.260012 | 0.6904 | 0.34128 |  | Iodide                                                                     | 21.978828  | - | - | - | 434.882  | 125.900013 |
| NEG01591 | 209030.8158 | 169814.6665 | -0.29975 | 0.165432 | 0.6274 | 0.20968 |  | PE(16:1(9Z)/16:1(9Z))                                                      | 19.064389  | - | - | - | 422.535  | 686.945839 |

|          |             |             |          |          |        |         |                                                           |            |   |   |   |          |            |
|----------|-------------|-------------|----------|----------|--------|---------|-----------------------------------------------------------|------------|---|---|---|----------|------------|
| NEG01594 | 282363.2043 | 249211.8564 | -0.18018 | 0.128255 | 0.5925 | 0.21556 | 7-Epizucchini factor A                                    | -10.134657 | - | - | - | 421.9285 | 680.928812 |
| NEG01602 | 272239.1802 | 148887.8    | -0.87065 | 0.160976 | 0.6224 | 0.38377 | 3,5-Dibromo-4-hydroxyphenylpyruvate                       | -7.8847952 | - | - | - | 421.26   | 336.939559 |
| NEG01624 | 288558.3293 | 263898.8658 | -0.12888 | 0.218921 | 0.6675 | 0.17602 | Butefine hydrochloride                                    | -10.924926 | - | - | - | 421.0695 | 352.916957 |
| NEG01629 | 640549.741  | 569186.3543 | -0.17041 | 0.369188 | 0.7408 | 0.26857 | Tetrachlorvinphos                                         | -10.497768 | - | - | - | 421.032  | 364.950682 |
| NEG01634 | 273442.8769 | 241001.9968 | -0.18219 | 0.36446  | 0.7397 | 0.17869 | Clemastine                                                | -20.458246 | - | - | - | 421.0175 | 342.875888 |
| NEG01651 | 67578.22596 | 62253.68454 | -0.1184  | 0.368292 | 0.7406 | 0.06924 | PE(14:1(9Z)/16:1(9Z))                                     | -20.445738 | - | - | - | 420.834  | 658.853432 |
| NEG01653 | 57383.29152 | 48178.07606 | -0.25225 | 0.319413 | 0.7192 | 0.10085 | Dimeflin hydrochloride                                    | 2.4727141  | - | - | - | 420.828  | 358.840213 |
| NEG01656 | 55017.69837 | 48068.85728 | -0.19479 | 0.231207 | 0.6747 | 0.09469 | Gravacridonolchlorine                                     | 24.380132  | - | - | - | 420.821  | 374.804886 |
| NEG01659 | 71404.05884 | 67790.57374 | -0.07492 | 0.614063 | 0.8559 | 0.05367 | Chlorphonium chloride                                     | 10.039087  | - | - | - | 420.675  | 396.786817 |
| NEG01661 | 58064.31704 | 49167.54486 | -0.23995 | 0.356596 | 0.7347 | 0.09333 | Ochratoxin A                                              | -4.473098  | - | - | - | 420.644  | 402.803917 |
| NEG01669 | 477672.8074 | 424044.2901 | -0.17181 | 0.639852 | 0.8677 | 0.10816 | 2-Bromoacetaldehyde                                       | 21.794752  | - | - | - | 416.4255 | 121.944003 |
| NEG01674 | 368109.4098 | 297199.8619 | -0.3087  | 0.076022 | 0.5279 | 0.31695 | 1R-NMe(14:1(9Z)/20:5(5Z,8Z))                              | -1.7142648 | - | - | - | 414.1485 | 720.948486 |
| NEG01675 | 540994.2877 | 619377.2824 | 0.195205 | 0.587193 | 0.8421 | 0.15521 | Mazaticol hydrochloride                                   | -23.831997 | - | - | - | 413.958  | 441.017089 |
| NEG01686 | 1411401.07  | 1237213.384 | -0.19003 | 0.146176 | 0.6127 | 0.49271 | Iodide                                                    | 21.895756  | - | - | - | 411.132  | 125.900002 |
| NEG01690 | 3144324.255 | 3854638.615 | 0.293846 | 0.322474 | 0.7192 | 0.80857 | Tetrafluoroethylene                                       | -14.014999 | - | - | - | 410.76   | 99.0063217 |
| NEG01709 | 2192367.468 | 2099088.497 | -0.06273 | 0.907878 | 0.9697 | 0.31739 | Novclobiocin 105                                          | 15.034358  | - | - | - | 409.258  | 574.992883 |
| NEG01713 | 2444087.116 | 2319112.976 | -0.07572 | 0.802127 | 0.9311 | 0.19933 | YC 170                                                    | 5.8110748  | - | - | - | 408.5985 | 486.972859 |
| NEG01714 | 2069180.432 | 2923302.712 | 0.49854  | 0.117322 | 0.5786 | 1.08313 | Glyburide                                                 | -12.889745 | - | - | - | 408.586  | 492.989856 |
| NEG01721 | 588049.9285 | 489613.2731 | -0.2643  | 0.486703 | 0.7989 | 0.2806  | PS(DiMe(9,3)/DiMe(9,3))                                   | 15.925126  | - | - | - | 407.735  | 808.968222 |
| NEG01730 | 1068058.186 | 973551.4165 | -0.13366 | 0.798147 | 0.9306 | 0.0664  | 2,5-Dichloro-4-oxohex-2-enedioate                         | 10.939029  | - | - | - | 405.8295 | 225.994207 |
| NEG01737 | 4273971.996 | 7687700.675 | 0.846975 | 0.320094 | 0.7192 | 1.23812 | o-Oxo-2-nyaroxy-1-(4-chlorophenyl)-3,3,3-trichloroacetate | -18.155001 | - | - | - | 404.133  | 381.008688 |
| NEG01748 | 222447.9174 | 195212.8795 | -0.18842 | 0.190859 | 0.6485 | 0.18705 | 3-Phospho-D-glycerate                                     | -24.393298 | - | - | - | 391.63   | 185.045385 |
| NEG01764 | 690994.327  | 728819.2678 | 0.076887 | 0.528487 | 0.8188 | 0.0741  | UTP                                                       | -2.560463  | - | - | - | 390.864  | 483.132584 |

|          |             |             |          |          |        |         |                                                                            |            |   |   |   |          |            |
|----------|-------------|-------------|----------|----------|--------|---------|----------------------------------------------------------------------------|------------|---|---|---|----------|------------|
| NEG01766 | 297877.1907 | 306333.6268 | 0.040386 | 0.787123 | 0.927  | 0.00099 | Prochlorperazine mesylate                                                  | -19.567108 | - | - | - | 390.864  | 565.135645 |
| NEG01794 | 1806985.239 | 1380536.242 | -0.38836 | 0.114892 | 0.5747 | 0.74315 | Iodide                                                                     | 21.658431  | - | - | - | 385.951  | 125.899972 |
| NEG01795 | 316331.6798 | 284224.1913 | -0.15441 | 0.636127 | 0.8664 | 0.11981 | 2-Bromoacetaldehyde                                                        | 21.728372  | - | - | - | 385.913  | 121.943995 |
| NEG01810 | 996150.1248 | 883070.4074 | -0.17383 | 0.888389 | 0.9626 | 0.22742 | Tetrafluoroethylene                                                        | 8.4444512  | - | - | - | 382.3935 | 99.008568  |
| NEG01820 | 6155175.761 | 4163007.77  | -0.56417 | 0.417093 | 0.7646 | 1.53485 | 6-Oxo-2-hydroxy-7-(4'-chlorophenyl)-3,8,8-trichloroocta-2E,4E,7E-trienoate | -18.259867 | - | - | - | 377.166  | 381.008648 |
| NEG01825 | 148783.9187 | 161560.5611 | 0.118856 | 0.395718 | 0.7526 | 0.07888 | Propanil                                                                   | -5.8040325 | - | - | - | 374.936  | 217.071358 |
| NEG01849 | 417665.4045 | 311345.0803 | -0.42383 | 0.041473 | 0.4403 | 0.39583 | 2-Hydroxyethylphosphate                                                    | 15.990023  | - | - | - | 362.0475 | 125.043039 |
| NEG01855 | 4178844.346 | 1894788.817 | -1.14107 | 0.075619 | 0.5279 | 1.61461 | Iodide                                                                     | 21.774784  | - | - | - | 358.538  | 125.899987 |
| NEG01861 | 58331.64441 | 73518.56234 | 0.33383  | 0.35064  | 0.7323 | 0.08926 | Prochlorperazine mesylate                                                  | -20.018294 | - | - | - | 358.347  | 565.13539  |
| NEG01869 | 272032.3425 | 359014.9204 | 0.400266 | 0.224502 | 0.6707 | 0.23605 | UTP                                                                        | -2.8377245 | - | - | - | 358.286  | 483.13245  |
| NEG01883 | 32412.98608 | 42531.22242 | 0.39195  | 0.279971 | 0.7002 | 0.07247 | PC(18:2(9Z,12Z)/P-18:1(11Z))                                               | -3.0583579 | - | - | - | 358.244  | 767.088474 |
| NEG01899 | 391701.64   | 370151.3161 | -0.08164 | 0.586215 | 0.8419 | 0.14285 | PE(14:0/18:0)                                                              | 9.6411748  | - | - | - | 355.355  | 690.971395 |
| NEG01902 | 256809.0539 | 207400.106  | -0.30828 | 0.330257 | 0.7223 | 0.25385 | PE(14:0/P-18:0)                                                            | -18.14106  | - | - | - | 354.614  | 674.940161 |
| NEG01911 | 220363.232  | 183550.1617 | -0.26371 | 0.243545 | 0.6825 | 0.21567 | Monoammonium glycyrrhizite                                                 | -11.157094 | - | - | - | 353.919  | 838.945952 |
| NEG01919 | 75068.60429 | 68835.34381 | -0.12506 | 0.58664  | 0.8419 | 0.05955 | Quadrigemine A                                                             | 21.196948  | - | - | - | 352.696  | 689.928769 |
| NEG01923 | 490425.8014 | 390961.6886 | -0.32701 | 0.056832 | 0.4892 | 0.40996 | YC 170                                                                     | 5.5430245  | - | - | - | 352.3535 | 486.972728 |
| NEG01924 | 69441.9833  | 53982.13484 | -0.36333 | 0.220498 | 0.6688 | 0.12903 | PA(14:1(9Z)/22:2(13Z,16Z))                                                 | -15.876147 | - | - | - | 352.326  | 697.944627 |
| NEG01928 | 81804.2481  | 65849.14284 | -0.31301 | 0.15029  | 0.6145 | 0.14486 | PA(14:0/20:2(11Z,14Z))                                                     | 21.578255  | - | - | - | 352.262  | 671.932244 |
| NEG01934 | 79975.74539 | 56330.24692 | -0.50565 | 0.074241 | 0.5245 | 0.16621 | Spinosyn A                                                                 | -24.326358 | - | - | - | 351.634  | 730.930418 |
| NEG01935 | 160077.8117 | 170068.4696 | 0.087342 | 0.709356 | 0.9015 | 0.04106 | Phenolic phosphate                                                         | -12.124008 | - | - | - | 351.63   | 173.081713 |
| NEG01939 | 162653.2909 | 129488.4342 | -0.32898 | 0.098352 | 0.5586 | 0.21367 | beta1-Chaconine                                                            | 10.179289  | - | - | - | 351.2235 | 704.918109 |
| NEG01942 | 823137.3229 | 491783.447  | -0.74311 | 0.062384 | 0.5022 | 0.66092 | Glycerone phosphate                                                        | -0.2586163 | - | - | - | 350.895  | 169.050479 |

|          |             |             |          |          |        |         |                                                                              |            |   |   |   |          |            |
|----------|-------------|-------------|----------|----------|--------|---------|------------------------------------------------------------------------------|------------|---|---|---|----------|------------|
| NEG01957 | 45535.69473 | 40661.10524 | -0.16335 | 0.499329 | 0.8016 | 0.06548 | Formamidopyrimidine nucleoside triphosphate                                  | 15.926651  | - | - | - | 350.212  | 540.197043 |
| NEG01960 | 87492.03819 | 77259.84552 | -0.17943 | 0.490025 | 0.7998 | 0.06074 | Spirolide B                                                                  | -10.950939 | - | - | - | 350.117  | 692.937224 |
| NEG01962 | 106943.0206 | 117747.1675 | 0.13885  | 0.640485 | 0.8681 | 0.04633 | Sorafenib beta-D-Glucuronide                                                 | 20.749698  | - | - | - | 349.985  | 639.955023 |
| NEG01970 | 5889985.7   | 5345695.479 | -0.13989 | 0.129013 | 0.5925 | 0.92921 | Radon-222                                                                    | 12.29675   | - | - | - | 349.7045 | 220.995453 |
| NEG01971 | 508907.378  | 270851.9918 | -0.9099  | 0.318359 | 0.7192 | 0.54381 | 2-Bromoacetaldehyde                                                          | 21.655067  | - | - | - | 349.693  | 121.943986 |
| NEG01985 | 79601.26881 | 67602.31179 | -0.23572 | 0.337057 | 0.7276 | 0.1055  | Formyl phosphate                                                             | -11.650321 | - | - | - | 348.836  | 124.996555 |
| NEG02004 | 120871.6509 | 101161.463  | -0.25682 | 0.316664 | 0.7189 | 0.13607 | beta-Hederin                                                                 | -13.542988 | - | - | - | 348.206  | 733.93887  |
| NEG02007 | 119028.7687 | 95576.10548 | -0.31659 | 0.251157 | 0.6861 | 0.152   | PC(14:1(9Z)/16:1(9Z))                                                        | 9.3296615  | - | - | - | 348.143  | 700.953172 |
| NEG02013 | 201533.8965 | 173177.5342 | -0.21877 | 0.431008 | 0.77   | 0.1591  | CDP-DG(a-13:0/a-13:0)                                                        | 8.3792776  | - | - | - | 347.7455 | 868.924013 |
| NEG02016 | 63306.92574 | 56820.36355 | -0.15596 | 0.56706  | 0.8344 | 0.06667 | Digitoxigenin 5-[glucosyl-(1-&gt;6)-glucosyl-(1-&gt;6)-galactosyl-(1-&gt;6)] | -8.4808166 | - | - | - | 347.417  | 827.922393 |
| NEG02022 | 81318.26143 | 70359.79412 | -0.20883 | 0.404481 | 0.7582 | 0.08293 | Patellamide A                                                                | 13.296816  | - | - | - | 347.113  | 741.954102 |
| NEG02027 | 141064.6366 | 126656.312  | -0.15544 | 0.503713 | 0.8042 | 0.07261 | PS(18:4(6Z,9Z,12Z,15Z)/18:4(6Z,9Z,12Z,15Z))                                  | -17.245698 | - | - | - | 346.859  | 774.940341 |
| NEG02029 | 66950.12269 | 69248.3486  | 0.048693 | 0.850899 | 0.9515 | 0.00392 | Beauvericin                                                                  | 18.374999  | - | - | - | 346.736  | 782.955928 |
| NEG02038 | 109600.3094 | 95116.40696 | -0.20449 | 0.198158 | 0.6561 | 0.11105 | PC(14:0/P-16:0)                                                              | -9.4630946 | - | - | - | 346.359  | 688.972494 |
| NEG02044 | 226138.6257 | 268596.139  | 0.248231 | 0.436967 | 0.7726 | 0.13718 | PG(16:0/16:0)                                                                | -22.976148 | - | - | - | 346.159  | 721.958112 |
| NEG02048 | 35890.64096 | 44749.31735 | 0.318258 | 0.169443 | 0.6304 | 0.1008  | Bis(4-nitrophenyl)phosphate                                                  | -24.183579 | - | - | - | 345.992  | 339.166697 |
| NEG02054 | 53446.43754 | 56157.08894 | 0.071374 | 0.801389 | 0.9311 | 0.02621 | 2-Aminoethyl diphenylborite                                                  | 24.615762  | - | - | - | 345.7745 | 224.092164 |
| NEG02057 | 141905.8948 | 136898.0649 | -0.05183 | 0.780514 | 0.9255 | 0.0511  | Glyphosate                                                                   | 3.2272867  | - | - | - | 345.738  | 168.066369 |
| NEG02060 | 119693.5444 | 115225.8353 | -0.05488 | 0.81236  | 0.935  | 0.01536 | 3-(Phosphoacetylamido)-L-alanine                                             | 9.9263479  | - | - | - | 345.588  | 241.118927 |
| NEG02082 | 346125.6048 | 336845.9459 | -0.03921 | 0.750671 | 0.9147 | 0.10124 | DG(15:0/0/22:5n3)                                                            | 4.7527687  | - | - | - | 344.931  | 627.974713 |
| NEG02089 | 1008353.74  | 990959.1627 | -0.0251  | 0.928909 | 0.9762 | 0.07998 | 14-hydroxyclearithromycin                                                    | 18.382449  | - | - | - | 344.48   | 762.959567 |
| NEG02096 | 2542754.035 | 2498342.489 | -0.02542 | 0.92924  | 0.9763 | 0.08677 | 2,5-Dichloro-4-oxohex-2-enedioate                                            | 9.6393091  | - | - | - | 343.558  | 225.993912 |
| NEG02098 | 610256.3673 | 545087.8314 | -0.16293 | 0.379667 | 0.7473 | 0.1817  | 3(S),10(R)-OH-octadeca-6-trans-4,12-cis-trienoate                            | -17.298769 | - | - | - | 343.532  | 636.008704 |

|          |             |             |          |          |        |         |                                                         |            |   |   |   |          |            |
|----------|-------------|-------------|----------|----------|--------|---------|---------------------------------------------------------|------------|---|---|---|----------|------------|
| NEG02102 | 42889396.94 | 49752428.75 | 0.214146 | 0.217713 | 0.6665 | 2.20201 | Tetrafluoroethylene                                     | -14.957536 | - | - | - | 343.2175 | 99.0062274 |
| NEG02104 | 486430.4589 | 429823.3479 | -0.17849 | 0.534168 | 0.8219 | 0.17664 | PIP(16:1(9Z)/16:1(9Z))                                  | -10.077291 | - | - | - | 342.904  | 885.963885 |
| NEG02107 | 132721.2754 | 145560.1146 | 0.133215 | 0.650686 | 0.8732 | 0.0538  | PIP2(16:0/16:1(9Z))                                     | -2.4157219 | - | - | - | 342.892  | 967.966183 |
| NEG02115 | 1642680.754 | 1442760.936 | -0.18722 | 0.071234 | 0.5226 | 0.51524 | PA(15:0/22:4(7Z,10Z,13Z,16Z))                           | 15.681241  | - | - | - | 342.151  | 709.977872 |
| NEG02116 | 1092307.078 | 658728.3996 | -0.72962 | 0.018242 | 0.3332 | 0.88245 | PS(14:1(9Z)/22:5(4Z,7Z,10Z,13Z,16Z))                    | 6.8308416  | - | - | - | 342.022  | 778.991051 |
| NEG02117 | 279837.6494 | 285829.1974 | 0.030563 | 0.870477 | 0.9567 | 0.05233 | ADP-ribose                                              | 1.0552111  | - | - | - | 342.005  | 620.020779 |
| NEG02128 | 204240.9869 | 212271.5782 | 0.055639 | 0.787938 | 0.9276 | 0.03056 | 1&apos;&apos;,&apos;&apos;,&apos;&apos;&apos; phosphate | 13.215772  | - | - | - | 341.5705 | 319.038153 |
| NEG02131 | 292867.5695 | 328772.3798 | 0.166841 | 0.259568 | 0.6904 | 0.13558 | TDE                                                     | 13.215772  | - | - | - | 341.5705 | 319.038153 |
| NEG02143 | 423801.577  | 487299.617  | 0.20142  | 0.646087 | 0.8704 | 0.07544 | CDP-DG(18:2(9Z,11Z)/a-15:0)                             | -22.879634 | - | - | - | 341.523  | 963.051666 |
| NEG02144 | 581667.5386 | 624935.7369 | 0.103513 | 0.651805 | 0.8735 | 0.13448 | PS(14:0/22:4(7Z,10Z,13Z,16Z))                           | 9.2315882  | - | - | - | 341.336  | 783.024961 |
| NEG02147 | 509273.7112 | 639906.8762 | 0.329421 | 0.150278 | 0.6145 | 0.32029 | PIP2(16:0/22:5(4Z,7Z,10Z,13Z,16Z))                      | -11.429464 | - | - | - | 341.336  | 1044.05258 |
| NEG02149 | 244415.6774 | 272711.961  | 0.158041 | 0.310136 | 0.7168 | 0.11852 | Dichloran                                               | -12.469842 | - | - | - | 341.327  | 206.004342 |
| NEG02150 | 518912.2551 | 590654.6719 | 0.186824 | 0.083573 | 0.5411 | 0.26194 | Podorhizol beta-D-glucoside                             | -0.5663903 | - | - | - | 341.325  | 577.554196 |
| NEG02159 | 628180.7255 | 642492.8847 | 0.032501 | 0.813387 | 0.9353 | 0.04663 | Maytansine                                              | 6.315319   | - | - | - | 341.3245 | 691.193195 |
| NEG02160 | 1252217.845 | 1422479.625 | 0.183922 | 0.046495 | 0.4568 | 0.41872 | PA(15:0/22:0)                                           | 20.248601  | - | - | - | 341.25   | 718.045283 |
| NEG02161 | 1976917.232 | 2143076.274 | 0.116431 | 0.115251 | 0.575  | 0.38099 | 23-Hydroxyphysalolactone                                | -19.250874 | - | - | - | 341.2405 | 554.039038 |
| NEG02169 | 144240.9458 | 172181.7069 | 0.255451 | 0.484221 | 0.798  | 0.10343 | PC(18:4(6Z,9Z,12Z,15Z)/20:5(5Z,8Z,11Z,14Z,17Z))         | -3.4522884 | - | - | - | 341.23   | 799.045361 |
| NEG02170 | 843441.5403 | 824128.7839 | -0.03342 | 0.83615  | 0.9465 | 0.1045  | N-Demethyl-desepoxymaytansinol                          | -10.86483  | - | - | - | 341.213  | 534.01591  |
| NEG02176 | 1677820.463 | 1712567.27  | 0.029572 | 0.801424 | 0.9311 | 0.04069 | Iodofenphos                                             | 0.6016322  | - | - | - | 341.206  | 411.989572 |
| NEG02177 | 6951851.397 | 7825468.84  | 0.17078  | 0.052793 | 0.4813 | 0.92308 | Sanguisorbin E                                          | -5.4459978 | - | - | - | 341.128  | 791.980605 |
| NEG02179 | 324945.5917 | 340409.4555 | 0.067073 | 0.708999 | 0.9015 | 0.06018 | PG(16:0/22:4(7Z,10Z,13Z,16Z))                           | -18.404179 | - | - | - | 341.1265 | 798.043817 |
| NEG02184 | 254606.4582 | 198403.7846 | -0.35983 | 0.281672 | 0.7016 | 0.26107 | Chivosazole E                                           | 7.3250497  | - | - | - | 341.111  | 823.006559 |
| NEG02186 | 31865792.7  | 35477901.15 | 0.154912 | 0.055828 | 0.4884 | 1.86516 | Ferrichrome                                             | -17.212906 | - | - | - | 341.0675 | 739.500477 |
|          |             |             |          |          |        |         | PS(15:0/22:4(7Z,10Z,13Z,16Z))                           | -5.3714617 | - | - | - | 341.0565 | 797.040437 |

|          |             |             |          |          |        |         |  |                                                                           |            |   |   |   |          |            |
|----------|-------------|-------------|----------|----------|--------|---------|--|---------------------------------------------------------------------------|------------|---|---|---|----------|------------|
| NEG02188 | 1974368.697 | 2039216.195 | 0.046623 | 0.66433  | 0.8795 | 0.00795 |  | CerP(d18:1/22:0)                                                          | -15.663608 | - | - | - | 341.055  | 701.021827 |
| NEG02189 | 3671525.828 | 4028039.157 | 0.133698 | 0.11286  | 0.5707 | 0.51832 |  | PGP(18:0/20:3(5Z,8Z,11Z))                                                 | -8.84023   | - | - | - | 341.055  | 880.046535 |
| NEG02190 | 798762.4314 | 1000822.069 | 0.325347 | 0.024608 | 0.3595 | 0.49522 |  | DG(15:0/0:0/22:1n9)                                                       | 10.242231  | - | - | - | 341.0535 | 636.042248 |
| NEG02195 | 5044540.152 | 5573683.154 | 0.143908 | 0.137991 | 0.6035 | 0.62257 |  | PC(14:0/P-18:0)                                                           | 14.489036  | - | - | - | 341.0355 | 717.042627 |
| NEG02196 | 1985834.72  | 1888548.481 | -0.07247 | 0.717098 | 0.904  | 0.25118 |  | Alloxan                                                                   | 0.2346861  | - | - | - | 341.034  | 141.062457 |
| NEG02197 | 18797456.84 | 21019641.18 | 0.161201 | 0.064616 | 0.509  | 1.40718 |  | 1-O-(1Z-Tetradecenyl)-2-(9Z-octadecenoyl)-sn-glycero-3-phosphocholine     | 23.244902  | - | - | - | 341.03   | 716.040891 |
| NEG02200 | 151759.192  | 259979.2171 | 0.776612 | 0.017622 | 0.3285 | 0.38164 |  | Scopoloside I                                                             | -9.1688171 | - | - | - | 341.028  | 932.025369 |
| NEG02202 | 95748734.89 | 105626633.9 | 0.141648 | 0.085911 | 0.5433 | 2.83857 |  | SM C16:1                                                                  | -2.9453506 | - | - | - | 341.026  | 715.037414 |
| NEG02203 | 922883.9066 | 1000543.874 | 0.116563 | 0.427973 | 0.7691 | 0.19075 |  | 31-Hydroxy rifabutin                                                      | 6.1532225  | - | - | - | 341.026  | 862.002134 |
| NEG02209 | 14863401.88 | 16347657.94 | 0.13732  | 0.113195 | 0.5714 | 1.06324 |  | 1-Diphosinositol pentakisphosphate                                        | -12.485425 | - | - | - | 341.0235 | 738.998684 |
| NEG02217 | 208785.1992 | 200284.6597 | -0.05997 | 0.751509 | 0.9148 | 0.05426 |  | TG(15:0/20:0/o-18:0)                                                      | 24.397876  | - | - | - | 341.022  | 862.504791 |
| NEG02228 | 15573371.99 | 16352990.65 | 0.070473 | 0.480431 | 0.7955 | 0.42726 |  | Novclobiocin 105                                                          | 14.477077  | - | - | - | 341.017  | 574.992562 |
| NEG02229 | 10038902.09 | 10861351.15 | 0.113602 | 0.220008 | 0.6687 | 0.68726 |  | Glyburide                                                                 | -13.237815 | - | - | - | 341.0165 | 492.989684 |
| NEG02230 | 1492426.676 | 1766552.88  | 0.243277 | 0.012084 | 0.2865 | 0.60264 |  | Bryostatin 1                                                              | -19.068366 | - | - | - | 341.0165 | 904.008066 |
| NEG02234 | 28300237.95 | 31270719.22 | 0.143998 | 0.079606 | 0.5356 | 1.58863 |  | CE(5D5)                                                                   | 23.645743  | - | - | - | 341.0155 | 634.037739 |
| NEG02242 | 524762.4828 | 533292.0888 | 0.023261 | 0.889954 | 0.9633 | 0.05064 |  | PC(15:0/18:3(6Z,9Z,12Z))                                                  | -9.5600274 | - | - | - | 341.01   | 741.00343  |
| NEG02246 | 42606828.32 | 47031189.97 | 0.142533 | 0.07845  | 0.5337 | 1.99537 |  | 3,5-Dichloro-2-methylmucote                                               | 17.943958  | - | - | - | 340.999  | 224.022861 |
| NEG02260 | 4457645754  | 4838871613  | 0.118389 | 0.136191 | 0.6016 | 17.2216 |  | Normitrogen mustard                                                       | -20.914126 | - | - | - | 340.777  | 141.016753 |
| NEG02264 | 1034632.52  | 1306515.539 | 0.336606 | 0.410073 | 0.7604 | 0.4124  |  | Cycloheptanecarboxylic acid                                               | -8.098718  | - | - | - | 340.719  | 141.187172 |
| NEG02269 | 16026636.84 | 11020990.4  | -0.54022 | 0.030831 | 0.3953 | 3.00836 |  | 6-Oxo-2-hydroxy-7-(4-chlorophenyl)-3,8,8-trichloroocta-2E,4E,7E-trienoate | -18.459727 | - | - | - | 340.31   | 381.008571 |
| NEG02270 | 185039.8521 | 200024.5481 | 0.112341 | 0.781631 | 0.9257 | 0.02945 |  | CDP-DG(a-13:0/a-15:0)                                                     | 18.774784  | - | - | - | 340.31   | 896.987583 |
| NEG02273 | 158088.6746 | 170773.8628 | 0.111353 | 0.524765 | 0.8163 | 0.05013 |  | Perfluorohexane sulfonic acid                                             | 14.922268  | - | - | - | 338.124  | 399.113694 |

|          |             |             |          |          |        |         |                                                                                    |            |   |   |   |          |            |
|----------|-------------|-------------|----------|----------|--------|---------|------------------------------------------------------------------------------------|------------|---|---|---|----------|------------|
| NEG02301 | 119202.3232 | 114043.3359 | -0.06383 | 0.711918 | 0.9019 | 0.05569 | Monoammonium glycyrrhizite                                                         | -11.205501 | - | - | - | 334.561  | 838.945911 |
| NEG02304 | 193075.7846 | 185507.9872 | -0.05769 | 0.776989 | 0.9242 | 0.06245 | DG(18:2n6/0:0/20:5n3)                                                              | -16.938398 | - | - | - | 334.215  | 651.982663 |
| NEG02307 | 259941.1591 | 222606.343  | -0.22369 | 0.364258 | 0.7397 | 0.18838 | PE(14:0/18:0)                                                                      | 9.4357972  | - | - | - | 334.047  | 690.971253 |
| NEG02313 | 188873.681  | 163241.099  | -0.21042 | 0.264254 | 0.6923 | 0.17681 | PE(14:0/P-18:0)                                                                    | -17.815601 | - | - | - | 333.751  | 674.940381 |
| NEG02316 | 501519.5147 | 657548.6932 | 0.390792 | 0.567165 | 0.8345 | 0.11307 | L-Selenocysteine                                                                   | 1.1788023  | - | - | - | 333.3775 | 167.046122 |
| NEG02317 | 468006.8167 | 459299.6638 | -0.02709 | 0.945373 | 0.9818 | 0.02857 | 12,13-epoxy-9-alkoxy-10E-octadecenoate                                             | 0.3525251  | - | - | - | 333.36   | 156.990779 |
| NEG02324 | 352455.5653 | 371663.9768 | 0.076557 | 0.770365 | 0.9221 | 0.0062  | Clocapramine dihydrochloride                                                       | 20.012277  | - | - | - | 332.734  | 552.99831  |
| NEG02330 | 116323.7197 | 88618.29042 | -0.39247 | 0.262381 | 0.6915 | 0.1814  | 1-hexadecanoyl- $\alpha$ -( $\nu$ Z)-octadecenyl)-sn-glycero-3-phosphatidylcholine | 21.458627  | - | - | - | 332.315  | 717.004531 |
| NEG02342 | 894170.6056 | 718976.6075 | -0.31461 | 0.089584 | 0.5511 | 0.53688 | Tetranitromethane                                                                  | 21.24353   | - | - | - | 330.892  | 195.029588 |
| NEG02348 | 2361381.543 | 1760459.171 | -0.42368 | 0.060527 | 0.4986 | 0.9488  | YC 170                                                                             | 5.6713296  | - | - | - | 330.1155 | 486.972791 |
| NEG02357 | 655295.5195 | 617460.5457 | -0.0858  | 0.59177  | 0.8437 | 0.13399 | sn-Glycerol 3-phosphate                                                            | -1.8881903 | - | - | - | 329.6485 | 171.066098 |
| NEG02358 | 350254.6425 | 287191.8271 | -0.28639 | 0.525997 | 0.8168 | 0.13147 | PS(DiMe(9,3)/DiMe(9,3))                                                            | 15.705221  | - | - | - | 329.618  | 808.968044 |
| NEG02360 | 456676.8743 | 505476.1918 | 0.146469 | 0.529551 | 0.8192 | 0.15386 | Barbiturate                                                                        | -19.858021 | - | - | - | 329.486  | 127.07638  |
| NEG02363 | 213238.4472 | 154466.9659 | -0.46517 | 0.274471 | 0.6994 | 0.24951 | FAHFA(22:6(4Z,7Z,10Z,13Z,16Z,19Z)/14-O-22:6(4Z,7Z,10Z,13Z,16Z,19Z))                | -21.155109 | - | - | - | 329.1    | 653.954867 |
| NEG02364 | 282851.6455 | 211158.6041 | -0.42172 | 0.110926 | 0.5694 | 0.28511 | DG(15:0/0:0/22:4n6)                                                                | 3.3267249  | - | - | - | 329.071  | 629.989823 |
| NEG02368 | 3467950.409 | 4635720.265 | 0.41871  | 0.412022 | 0.7613 | 0.73884 | Iodide                                                                             | 21.504174  | - | - | - | 328.125  | 125.899952 |
| NEG02370 | 12476536.77 | 11393999.45 | -0.13094 | 0.127422 | 0.5923 | 1.30965 | Radon-222                                                                          | 12.509505  | - | - | - | 327.9575 | 220.995501 |
| NEG02374 | 551017.0975 | 503608.6506 | -0.12979 | 0.284524 | 0.7021 | 0.23879 | Perflutren                                                                         | -13.637367 | - | - | - | 327.618  | 187.009459 |
| NEG02376 | 953717.4009 | 1084211.235 | 0.185012 | 0.577621 | 0.8394 | 0.22591 | 2-Bromoacetaldehyde                                                                | 21.584666  | - | - | - | 327.434  | 121.943977 |
| NEG02379 | 394976.112  | 529723.3137 | 0.423474 | 0.255033 | 0.6871 | 0.31578 | Glycerone phosphate                                                                | -0.0334322 | - | - | - | 327.1135 | 169.050518 |
| NEG02387 | 823805.6319 | 957223.3207 | 0.216552 | 0.461485 | 0.7838 | 0.24383 | Radium-224                                                                         | 0.0670983  | - | - | - | 326.661  | 224.992739 |
| NEG02389 | 3335006.681 | 3376357.705 | 0.017778 | 0.937324 | 0.9792 | 0.12295 | 2-Iodophenol                                                                       | -8.1159512 | - | - | - | 326.46   | 218.998738 |



|          |             |             |          |          |        |         |                                                                                                        |            |   |   |   |          |            |
|----------|-------------|-------------|----------|----------|--------|---------|--------------------------------------------------------------------------------------------------------|------------|---|---|---|----------|------------|
| NEG02392 | 1030949.023 | 1210715.93  | 0.231887 | 0.728954 | 0.9081 | 0.27481 | Ferrous lactate                                                                                        | -12.427513 | - | - | - | 326.397  | 232.974816 |
| NEG02401 | 132990.0555 | 114584.9656 | -0.2149  | 0.369819 | 0.7408 | 0.14606 | AS 1-1                                                                                                 | -15.025236 | - | - | - | 325.545  | 684.954017 |
| NEG02416 | 123532.8216 | 114254.4541 | -0.11264 | 0.375945 | 0.7441 | 0.08295 | (1E,5E)-4-hydroxyocta-1,3-diene-1,2,4-tricarboxylate                                                   | 8.799483   | - | - | - | 323.273  | 201.112802 |
| NEG02421 | 6616358.588 | 6324545.449 | -0.06508 | 0.72556  | 0.9063 | 0.49312 | 6-Oxo-2-hydroxy-7-(4-chlorophenyl)-3,8,8-trichloroocta-2E,4E,7E-trienoate                              | -18.297218 | - | - | - | 321.572  | 381.008633 |
| NEG02427 | 101790.8802 | 90140.34099 | -0.17536 | 0.612489 | 0.8552 | 0.0976  | Uvaricin                                                                                               | -14.487833 | - | - | - | 318.8125 | 647.936321 |
| NEG02430 | 238077.0179 | 207256.8376 | -0.20001 | 0.118701 | 0.5808 | 0.22007 | PC(14:0/16:0)                                                                                          | -10.551379 | - | - | - | 317.6785 | 704.970974 |
| NEG02434 | 808065.9338 | 761793.1288 | -0.08507 | 0.629257 | 0.8619 | 0.17561 | PS(15:0/16:0)                                                                                          | 1.9874183  | - | - | - | 315.648  | 720.948158 |
| NEG02440 | 991352.4549 | 821216.1933 | -0.27164 | 0.52056  | 0.8142 | 0.19545 | Mazaticol hydrochloride                                                                                | -23.878217 | - | - | - | 314.848  | 441.017068 |
| NEG02459 | 813189.7798 | 742263.0019 | -0.13166 | 0.052347 | 0.4813 | 0.34204 | Tetranitromethane                                                                                      | 21.371504  | - | - | - | 309.5145 | 195.029613 |
| NEG02467 | 150586.9675 | 132689.54   | -0.18254 | 0.579805 | 0.8394 | 0.13014 | Pseudoargiopinin I                                                                                     | -22.344642 | - | - | - | 306.908  | 742.9389   |
| NEG02471 | 352835.8589 | 275009.0879 | -0.35952 | 0.127783 | 0.5924 | 0.32142 | lysoPC(28:1(5Z))                                                                                       | 14.99177   | - | - | - | 306.603  | 660.935747 |
| NEG02476 | 44392.40567 | 40583.53062 | -0.12942 | 0.608688 | 0.8525 | 0.05111 | PC(14:0/14:0)                                                                                          | -23.518975 | - | - | - | 306.538  | 676.909279 |
| NEG02477 | 57273.84363 | 54992.9258  | -0.05863 | 0.748959 | 0.9146 | 0.03528 | Zuclopenthixol                                                                                         | -1.8407444 | - | - | - | 306.526  | 399.956985 |
| NEG02484 | 1879680.492 | 1790608.882 | -0.07004 | 0.57939  | 0.8394 | 0.21615 | 12,13-epoxy-9-alkoxy-10E-octadecenoate                                                                 | -0.5097589 | - | - | - | 306.371  | 156.990643 |
| NEG02504 | 805039.7979 | 671713.0215 | -0.26122 | 0.197111 | 0.6557 | 0.42697 | Mazaticol hydrochloride                                                                                | -23.958884 | - | - | - | 299.574  | 441.017033 |
| NEG02507 | 1631610.729 | 1881941.523 | 0.205925 | 0.510673 | 0.8083 | 0.40391 | 2-Bromoacetaldehyde                                                                                    | 21.42      | - | - | - | 299.1735 | 121.943957 |
| NEG02511 | 191760.3227 | 215785.3426 | 0.170293 | 0.464882 | 0.7856 | 0.07263 | alpha-D-Ribose 1,2-cyclic phosphate 5-phosphate 6-Oxo-2-hydroxy-7-(4-chlorophenyl)-3,8,8-trichloroocta | 16.282937  | - | - | - | 297.6925 | 291.071879 |
| NEG02516 | 5330941.452 | 2582734.647 | -1.04549 | 0.020898 | 0.3487 | 1.88503 | (4-chlorophenyl)-3,8,8-trichloroocta                                                                   | -18.282784 | - | - | - | 296.9255 | 381.008639 |
| NEG02524 | 2312960.257 | 2872254.046 | 0.312443 | 0.342164 | 0.7298 | 0.71025 | Iodide                                                                                                 | 21.107946  | - | - | - | 294.98   | 125.899902 |
| NEG02528 | 483180.972  | 559384.3984 | 0.211276 | 0.30791  | 0.7158 | 0.26784 | Se-Methyl-L-selenocysteine                                                                             | -5.1592021 | - | - | - | 293.8955 | 181.071584 |
| NEG02537 | 855297.2089 | 900841.2996 | 0.074847 | 0.81038  | 0.9347 | 0.01957 | 12,13-epoxy-9-alkoxy-10E-octadecenoate                                                                 | -0.7610185 | - | - | - | 288.5425 | 156.990603 |
| NEG02540 | 75130.14335 | 72594.62855 | -0.04953 | 0.813679 | 0.9353 | 0.02805 | Perfluorohexane sulfonic acid                                                                          | 14.743217  | - | - | - | 287.339  | 399.113622 |

|          |             |             |          |          |        |         |                                                   |            |   |   |   |          |            |
|----------|-------------|-------------|----------|----------|--------|---------|---------------------------------------------------|------------|---|---|---|----------|------------|
| NEG02554 | 169055.7794 | 136048.8632 | -0.31337 | 0.077084 | 0.5296 | 0.21381 | Lyciumin A                                        | 23.154563  | - | - | - | 279.6495 | 872.920358 |
| NEG02556 | 105779.5613 | 116116.3333 | 0.13451  | 0.701713 | 0.8994 | 0.00828 | Sporidesmin                                       | -19.936833 | - | - | - | 279.523  | 472.934174 |
| NEG02559 | 668972.7009 | 721590.4934 | 0.109233 | 0.60855  | 0.8524 | 0.06143 | 5-Vinylbacteriochlorophylli                       | 8.490181   | - | - | - | 279.31   | 615.987062 |
| NEG02576 | 1636108.022 | 1261509.388 | -0.37512 | 0.524903 | 0.8163 | 0.41771 | Mazaticol hydrochloride                           | -24.084531 | - | - | - | 277.527  | 441.016977 |
| NEG02579 | 37719788.52 | 34947824.91 | -0.11012 | 0.176455 | 0.6362 | 2.06588 | Radon-222                                         | 12.265456  | - | - | - | 277.281  | 220.995446 |
| NEG02580 | 468288.254  | 400516.6776 | -0.22553 | 0.509363 | 0.8082 | 0.21705 | PE(14:0/18:0)                                     | 7.5945125  | - | - | - | 277.193  | 690.969979 |
| NEG02581 | 2843161.782 | 2038121.873 | -0.48026 | 0.571811 | 0.8362 | 0.4679  | Ferrous lactate                                   | -12.387586 | - | - | - | 277.019  | 232.974825 |
| NEG02587 | 7085538.483 | 7256426.749 | 0.034382 | 0.913674 | 0.9715 | 0.23239 | 2-Iodophenol                                      | -8.2730327 | - | - | - | 276.5315 | 218.998703 |
| NEG02599 | 900091.3657 | 1243381.869 | 0.466126 | 0.357836 | 0.7353 | 0.50296 | Radium-224                                        | 0.1643007  | - | - | - | 275.832  | 224.992761 |
| NEG02603 | 254343.8984 | 260863.8461 | 0.036517 | 0.904339 | 0.9691 | 0.02412 | 3-(3,5-Diiodo-4-hydroxyphenyl)lactate             | -20.271151 | - | - | - | 275.1865 | 432.950326 |
| NEG02611 | 543574.11   | 655280.1596 | 0.269635 | 0.556696 | 0.8301 | 0.21426 | Cryolite                                          | 0.2604434  | - | - | - | 272.377  | 208.934078 |
| NEG02618 | 2210930.833 | 2280051.192 | 0.044412 | 0.91628  | 0.9721 | 0.17783 | 2-Bromoacetaldehyde                               | 21.381759  | - | - | - | 271.3485 | 121.943952 |
| NEG02630 | 3204773.728 | 3889023.673 | 0.279186 | 0.320331 | 0.7192 | 0.72388 | Iodide                                            | 21.147486  | - | - | - | 270.5375 | 125.899907 |
| NEG02646 | 1359234.094 | 1150332.813 | -0.24074 | 0.390435 | 0.751  | 0.45348 | 12,13-epoxy-9-alkoxy-10E-octadecenoate            | -0.6297369 | - | - | - | 266.061  | 156.990624 |
| NEG02660 | 8660531.585 | 8046908.377 | -0.10602 | 0.20428  | 0.6615 | 0.93047 | Radon-222                                         | 12.294318  | - | - | - | 262.74   | 220.995453 |
| NEG02663 | 4657733.142 | 1973494.939 | -1.23888 | 0.021006 | 0.3489 | 1.89736 | o-Oxo-2-nyuroxy-(4-chlorophenyl)-3,8-trichloroate | -18.191888 | - | - | - | 260.055  | 381.008674 |
| NEG02677 | 73545.68999 | 51620.28622 | -0.5107  | 0.212614 | 0.6634 | 0.14677 | YC 170                                            | 6.0524987  | - | - | - | 255.396  | 486.972977 |
| NEG02691 | 3479230.273 | 2988393.433 | -0.2194  | 0.371292 | 0.7415 | 0.57192 | Iodide                                            | 21.267955  | - | - | - | 254.493  | 125.899922 |
| NEG02701 | 2325017.142 | 2326116.266 | 0.000682 | 0.997585 | 0.999  | 0.09196 | 2-Bromoacetaldehyde                               | 21.456504  | - | - | - | 249.909  | 121.943961 |
| NEG02705 | 517854.3283 | 410207.1399 | -0.33619 | 0.068286 | 0.5185 | 0.38796 | Mazaticol hydrochloride                           | -24.112555 | - | - | - | 248.597  | 441.016965 |
| NEG02716 | 2822551.765 | 3637621.479 | 0.365995 | 0.464434 | 0.7854 | 0.50446 | 2-Iodophenol                                      | -8.1613131 | - | - | - | 247.127  | 218.998728 |
| NEG02721 | 160385.4627 | 128767.2127 | -0.31678 | 0.214681 | 0.6643 | 0.16451 | Dehydroascorbide(1-)                              | 22.803998  | - | - | - | 246.3115 | 172.097671 |
| NEG02728 | 808431.7523 | 799166.0198 | -0.01663 | 0.978012 | 0.994  | 0.01985 | Ferrous lactate                                   | -12.408296 | - | - | - | 244.675  | 232.97482  |

|          |             |             |          |          |        |         |                                                          |            |   |   |   |          |            |
|----------|-------------|-------------|----------|----------|--------|---------|----------------------------------------------------------|------------|---|---|---|----------|------------|
| NEG02730 | 11595827    | 10546370.15 | -0.13686 | 0.12343  | 0.5888 | 1.30785 | Radon-222                                                | 12.31396   | - | - | - | 243.885  | 220.995457 |
| NEG02735 | 1154291.982 | 1317812.442 | 0.191137 | 0.487356 | 0.799  | 0.15914 | Radium-224                                               | 0.2915155  | - | - | - | 242.866  | 224.992789 |
| NEG02745 | 574613.9562 | 553796.3108 | -0.05324 | 0.79414  | 0.9291 | 0.06919 | 12,13-epoxy-9-alkoxy-10E-octadecenoate                   | -0.5339474 | - | - | - | 241.95   | 156.990639 |
| NEG02756 | 1803873.717 | 2030732.228 | 0.170902 | 0.52934  | 0.8192 | 0.22308 | o-oxo-2-pyruoxy-1-(4-chlorophenyl)-2,2,2-trichloroethane | -18.171335 | - | - | - | 237.767  | 381.008682 |
| NEG02774 | 2142910.242 | 1894195.433 | -0.17799 | 0.200112 | 0.658  | 0.52376 | Iodide                                                   | 21.485477  | - | - | - | 229.745  | 125.89995  |
| NEG02785 | 991377.3684 | 897130.5015 | -0.14412 | 0.161564 | 0.6225 | 0.35041 | Perflutren                                               | -13.089783 | - | - | - | 228.875  | 187.009562 |
| NEG02803 | 3744758.906 | 3803590.736 | 0.022489 | 0.944999 | 0.9818 | 0.09917 | 2-Bromoacetaldehyde                                      | 21.547197  | - | - | - | 226.3605 | 121.943973 |
| NEG02823 | 2099045.144 | 1089199.494 | -0.94646 | 0.021576 | 0.3502 | 1.24923 | o-oxo-2-pyruoxy-1-(4-chlorophenyl)-2,2,2-trichloroethane | -18.091571 | - | - | - | 221.683  | 381.008712 |
| NEG02838 | 6622870.839 | 5955747.733 | -0.15317 | 0.11797  | 0.5807 | 1.04847 | Radon-222                                                | 12.507217  | - | - | - | 217.068  | 220.9955   |
| NEG02846 | 450983.4292 | 425700.0168 | -0.08324 | 0.712041 | 0.9019 | 0.12205 | Tantalum                                                 | 11.477225  | - | - | - | 211.115  | 179.9427   |
| NEG02863 | 5675676.481 | 3364004.795 | -0.75461 | 0.116883 | 0.5777 | 1.37217 | o-oxo-2-pyruoxy-1-(4-chlorophenyl)-2,2,2-trichloroethane | -18.093033 | - | - | - | 202.982  | 381.008711 |
| NEG02874 | 1099175.985 | 907526.7133 | -0.27641 | 0.421708 | 0.7663 | 0.32949 | Mazaticol hydrochloride                                  | -24.00898  | - | - | - | 199.424  | 441.017011 |
| NEG02897 | 40339.64561 | 14866.19611 | -1.44016 | 0.006903 | 0.2336 | 0.21354 | Pyrazolate                                               | -15.240568 | - | - | - | 196.33   | 438.298328 |
| NEG02919 | 1599699.436 | 1178345.584 | -0.44104 | 0.066793 | 0.5151 | 0.69614 | Perflutren                                               | -13.247736 | - | - | - | 193.783  | 187.009533 |
| NEG02926 | 8420106.169 | 8477318.847 | 0.00977  | 0.960305 | 0.9879 | 0.01145 | 2-Bromoacetaldehyde                                      | 21.672424  | - | - | - | 193.1495 | 121.943988 |
| NEG02939 | 1752454.162 | 1581926.281 | -0.14769 | 0.627085 | 0.8608 | 0.27884 | Radium-224                                               | 0.3883733  | - | - | - | 192.374  | 224.992811 |
| NEG02940 | 1072997.354 | 1037197.193 | -0.04896 | 0.801352 | 0.9311 | 0.01601 | 12,13-epoxy-9-alkoxy-10E-octadecenoate                   | -0.3395361 | - | - | - | 192.1945 | 156.99067  |
| NEG02941 | 741946.2116 | 743617.6035 | 0.003246 | 0.981014 | 0.9946 | 0.04724 | Violacene                                                | 8.1190758  | - | - | - | 192.158  | 353.921805 |
| NEG02965 | 27072440.93 | 23394670.24 | -0.21065 | 0.040957 | 0.44   | 2.5774  | Radon-222                                                | 12.590537  | - | - | - | 190.423  | 220.995518 |
| NEG02966 | 6893049.263 | 4663483.92  | -0.56373 | 0.098905 | 0.5601 | 1.56519 | 2-Iodophenol                                             | -7.9491283 | - | - | - | 190.4025 | 218.998775 |
| NEG02968 | 1058843.926 | 1015220.062 | -0.0607  | 0.629654 | 0.8619 | 0.18551 | 3-(3,5-Diiodo-4-hydroxyphenyl)lactate                    | -19.694969 | - | - | - | 190.341  | 432.950576 |
| NEG02970 | 183308.9855 | 223600.0071 | 0.286643 | 0.565187 | 0.8334 | 0.15228 | Chlorcyclizine                                           | 1.6021273  | - | - | - | 190.2625 | 299.819205 |
| NEG02973 | 51270.02426 | 52846.98767 | 0.043706 | 0.959719 | 0.9877 | 0.01842 | Triphenyltetrazolium chloride                            | 11.918287  | - | - | - | 190.234  | 333.798914 |

|          |             |             |          |          |        |         |                                                |            |   |   |   |          |            |
|----------|-------------|-------------|----------|----------|--------|---------|------------------------------------------------|------------|---|---|---|----------|------------|
| NEG02994 | 2443224.902 | 3459764.504 | 0.501887 | 0.582682 | 0.8406 | 0.65741 | Selenophosphate                                | -24.116948 | - | - | - | 188.988  | 158.938866 |
| NEG03003 | 298784.4215 | 238904.4019 | -0.32267 | 0.041089 | 0.44   | 0.33036 | N-Carbamoyl glucuronide<br>lorcaserin          | 22.719966  | - | - | - | 188.3025 | 408.906036 |
| NEG03007 | 1857144.471 | 1724358.007 | -0.10703 | 0.872855 | 0.9572 | 0.01457 | Phosphoramidate mustard                        | -19.797421 | - | - | - | 188.1925 | 220.010448 |
| NEG03018 | 193205.8057 | 184364.2925 | -0.06758 | 0.551261 | 0.8296 | 0.08163 | 2,3-Dibromo-1-propanol                         | 2.6774156  | - | - | - | 187.8305 | 216.880407 |
| NEG03055 | 445901.6972 | 382914.6681 | -0.2197  | 0.037546 | 0.4241 | 0.33768 | Clobenpropit                                   | 24.585954  | - | - | - | 186.6105 | 307.829916 |
| NEG03065 | 1333628.987 | 1045769.332 | -0.35079 | 0.650097 | 0.873  | 0.33308 | Ferrous lactate                                | -12.331319 | - | - | - | 186.482  | 232.974838 |
| NEG03076 | 168168.0885 | 134991.2975 | -0.31704 | 0.033456 | 0.405  | 0.2311  | 1,1-Dibromo-3-iodo-2-<br>propanone             | 16.683993  | - | - | - | 186.0075 | 340.766425 |
| NEG03083 | 97058.53815 | 69265.83008 | -0.48671 | 0.010526 | 0.2728 | 0.22308 | Triadimenol                                    | 15.534792  | - | - | - | 185.8285 | 294.761918 |
| NEG03101 | 541545.2252 | 454919.1929 | -0.25147 | 0.231458 | 0.6747 | 0.31138 | Dedimethylchlorpromazin<br>e                   | -4.2627724 | - | - | - | 185.346  | 289.802484 |
| NEG03117 | 1249454.161 | 1016605.099 | -0.29754 | 0.034447 | 0.4108 | 0.63411 | Sodium arsenite                                | -19.467972 | - | - | - | 185.032  | 128.900394 |
| NEG03118 | 114357.0708 | 100794.7443 | -0.18213 | 0.152198 | 0.6145 | 0.13633 | Chlordiazepoxide                               | 0.1236229  | - | - | - | 184.974  | 298.74776  |
| NEG03127 | 404153.422  | 375970.4238 | -0.10428 | 0.403476 | 0.7578 | 0.1784  | Quizalofop                                     | -2.3302942 | - | - | - | 184.591  | 343.74102  |
| NEG03137 | 76860.30735 | 52913.58462 | -0.5386  | 0.01315  | 0.2953 | 0.19189 | 6-Hydroxy-8-<br>hexacosanone                   | -0.1805652 | - | - | - | 184.294  | 395.682552 |
| NEG03140 | 99615.67166 | 69413.75285 | -0.52115 | 0.008266 | 0.2511 | 0.2365  | 17Z-hexacosenoic acid                          | 22.270898  | - | - | - | 184.224  | 393.685513 |
| NEG03148 | 728270.2003 | 659186.6988 | -0.14379 | 0.109584 | 0.5692 | 0.33042 | Gold                                           | -4.0130045 | - | - | - | 184.075  | 195.958533 |
| NEG03149 | 3345676.16  | 2887848.371 | -0.2123  | 0.087977 | 0.5472 | 0.7965  | Hydroiodic acid                                | -13.134351 | - | - | - | 184.062  | 126.903443 |
| NEG03152 | 46579.06933 | 83874.82632 | 0.848556 | 0.163392 | 0.625  | 0.20709 | Quinethazone                                   | 21.735472  | - | - | - | 183.956  | 288.737621 |
| NEG03162 | 107432.7609 | 93595.76131 | -0.19892 | 0.297081 | 0.7143 | 0.11728 | Methoxyflurane                                 | -20.045082 | - | - | - | 183.605  | 163.955517 |
| NEG03207 | 2392429.32  | 2162078.719 | -0.14606 | 0.052832 | 0.4813 | 0.60341 | 3-(Dichloromethylene)-<br>2,5-pyrrolidinedione | -20.930973 | - | - | - | 182.677  | 178.977956 |
| NEG03218 | 86618.632   | 79193.42909 | -0.1293  | 0.604464 | 0.8498 | 0.08194 | Vadium pentoxide                               | -10.360507 | - | - | - | 181.892  | 180.870839 |
| NEG03229 | 53343.83054 | 59025.37541 | 0.146014 | 0.60751  | 0.8516 | 0.05647 | Verrucologen                                   | -15.904703 | - | - | - | 181.553  | 510.551387 |
| NEG03232 | 71311.61452 | 76922.1518  | 0.109262 | 0.702193 | 0.8994 | 0.03002 | 3'-O-(4-<br>Benzoyl)benzoyl ATP                | 8.1532173  | - | - | - | 181.4805 | 714.391656 |
| NEG03242 | 88955.95314 | 84813.10053 | -0.0688  | 0.710824 | 0.9019 | 0.05464 | Nomilin                                        | 5.8985679  | - | - | - | 181.333  | 513.559959 |

|          |             |             |          |          |        |         |                                                                              |            |   |   |   |          |            |
|----------|-------------|-------------|----------|----------|--------|---------|------------------------------------------------------------------------------|------------|---|---|---|----------|------------|
| NEG03244 | 1317584.219 | 1161617.788 | -0.18176 | 0.171144 | 0.631  | 0.44663 | 2-Bromoacetaldehyde                                                          | 21.201554  | - | - | - | 181.281  | 121.94393  |
| NEG03249 | 3873661.321 | 3530547.111 | -0.13381 | 0.18035  | 0.6397 | 0.5161  | Iodide                                                                       | 21.82054   | - | - | - | 181.272  | 125.899993 |
| NEG03252 | 133094.8858 | 113578.8026 | -0.22876 | 0.453551 | 0.7814 | 0.1361  | Sophoranone                                                                  | 24.466973  | - | - | - | 181.271  | 459.608393 |
| NEG03254 | 174528.8038 | 112779.7417 | -0.62996 | 0.022277 | 0.354  | 0.32643 | Deoxytubulosine                                                              | -12.612918 | - | - | - | 181.266  | 458.609926 |
| NEG03256 | 57608.10249 | 57824.90647 | 0.005419 | 0.994008 | 0.9985 | 0.00146 | 4,4'-Diapolycopene                                                           | 20.760875  | - | - | - | 181.238  | 399.639641 |
| NEG03257 | 388737.2503 | 355156.4453 | -0.13034 | 0.259589 | 0.6904 | 0.1983  | Linoelaidyl carnitine                                                        | 14.801288  | - | - | - | 181.238  | 422.628094 |
| NEG03261 | 152832.3448 | 127327.6627 | -0.2634  | 0.267387 | 0.6945 | 0.15227 | ID14326                                                                      | -22.426262 | - | - | - | 181.216  | 507.656316 |
| NEG03263 | 385758.981  | 367786.2201 | -0.06883 | 0.936133 | 0.9789 | 0.1287  | (2S,4S)-5beta,4beta-dihydroxycholest-5-en-26-ate(1-)                         | -4.0202868 | - | - | - | 181.096  | 430.628988 |
| NEG03264 | 75742.81769 | 75254.77931 | -0.00933 | 0.97504  | 0.9931 | 0.02977 | Vardenafil                                                                   | -13.105352 | - | - | - | 181.0945 | 487.58932  |
| NEG03268 | 167948.6873 | 152711.6492 | -0.13721 | 0.601098 | 0.8483 | 0.09193 | 6-(4-{2,7-dimethoxy-2-ethyl-5H-tetrazol-2-yl}phenyl)-3-sulfodeoxycholic acid | 3.1330815  | - | - | - | 181.076  | 594.480589 |
| NEG03271 | 125965.8352 | 105575.7784 | -0.25475 | 0.306292 | 0.7152 | 0.1358  | 3-Sulfodeoxycholic acid                                                      | 21.701098  | - | - | - | 181.066  | 457.611676 |
| NEG03272 | 68034.8321  | 58257.9214  | -0.22382 | 0.460461 | 0.7836 | 0.06955 | Iriomoteolide 1a                                                             | -9.1231196 | - | - | - | 181.051  | 505.659401 |
| NEG03280 | 274583.0421 | 456871.2835 | 0.734545 | 0.4305   | 0.77   | 0.35319 | Imperialine                                                                  | 9.2150667  | - | - | - | 180.951  | 428.631883 |
| NEG03281 | 181183.9797 | 149735.6326 | -0.27504 | 0.031979 | 0.4009 | 0.22173 | 7alpha-Hydroxy-3-oxo-4-cholestenoate                                         | 19.990014  | - | - | - | 180.951  | 429.630332 |
| NEG03282 | 436352.3923 | 415724.8569 | -0.06986 | 0.429006 | 0.7695 | 0.12204 | Bensultap                                                                    | 24.031888  | - | - | - | 180.951  | 430.615996 |
| NEG03283 | 89393.47239 | 83925.59514 | -0.09106 | 0.712435 | 0.9019 | 0.06692 | Phylloquinone                                                                | 21.027724  | - | - | - | 180.951  | 449.697901 |
| NEG03285 | 204862.5059 | 171842.0484 | -0.25357 | 0.139237 | 0.6058 | 0.20347 | LysoPC(15:0)                                                                 | -19.365998 | - | - | - | 180.9495 | 480.586897 |
| NEG03288 | 106222.9514 | 104728.0408 | -0.02045 | 0.971259 | 0.9918 | 0.00416 | Cellulose triacetate                                                         | 11.338471  | - | - | - | 180.9405 | 536.521818 |
| NEG03289 | 73054.04968 | 75628.40447 | 0.049964 | 0.925544 | 0.9755 | 0.01286 | Myxochelin C                                                                 | -15.243859 | - | - | - | 180.938  | 538.518399 |
| NEG03291 | 83863.42501 | 73288.51142 | -0.19445 | 0.748914 | 0.9146 | 0.04701 | Ergosterol                                                                   | 11.162614  | - | - | - | 180.934  | 395.645551 |
| NEG03293 | 309326.431  | 231714.7314 | -0.41678 | 0.04797  | 0.4632 | 0.35205 | N-Oleoyl phenylalanine                                                       | 16.706538  | - | - | - | 180.933  | 428.644901 |
| NEG03294 | 187651.8195 | 157084.514  | -0.25652 | 0.489785 | 0.7998 | 0.10818 | Delphinidin 3-O-beta-D-sambubioside                                          | -23.454176 | - | - | - | 180.933  | 596.47761  |
| NEG03298 | 624588.7949 | 545588.5922 | -0.19509 | 0.786496 | 0.927  | 0.18359 | Glycolithocholate                                                            | -8.7969433 | - | - | - | 180.92   | 432.612809 |

|          |             |             |          |          |        |         |  |                                                                                                         |            |   |   |   |          |            |
|----------|-------------|-------------|----------|----------|--------|---------|--|---------------------------------------------------------------------------------------------------------|------------|---|---|---|----------|------------|
| NEG03300 | 154406.2111 | 148421.1682 | -0.05703 | 0.767111 | 0.9214 | 0.05373 |  | D1927                                                                                                   | 20.613273  | - | - | - | 180.9175 | 455.601435 |
| NEG03302 | 86119.66133 | 70455.99052 | -0.28962 | 0.418689 | 0.7657 | 0.11947 |  | Glycodeoxycholate                                                                                       | -7.170971  | - | - | - | 180.917  | 448.612799 |
| NEG03303 | 626712.9021 | 434584.9062 | -0.52817 | 0.022643 | 0.3561 | 0.59885 |  | Isomigrastatin                                                                                          | 14.695894  | - | - | - | 180.917  | 488.601019 |
| NEG03306 | 1214319.494 | 994918.2005 | -0.2875  | 0.108611 | 0.5681 | 0.6046  |  | Peimine                                                                                                 | -4.6765766 | - | - | - | 180.8335 | 430.641805 |
| NEG03309 | 729795.7996 | 657280.4792 | -0.15098 | 0.159847 | 0.6215 | 0.30658 |  | Mirex                                                                                                   | 0.8338834  | - | - | - | 180.8115 | 544.536178 |
| NEG03310 | 585957.4085 | 548810.6452 | -0.09449 | 0.262674 | 0.6915 | 0.20342 |  | OA-6129 E                                                                                               | -2.9111829 | - | - | - | 180.808  | 488.574198 |
| NEG03313 | 1085566.574 | 1019987.983 | -0.0899  | 0.32028  | 0.7192 | 0.25119 |  | Imperialine                                                                                             | -20.805562 | - | - | - | 180.79   | 428.618985 |
| NEG03314 | 790253.9394 | 670949.6909 | -0.23611 | 0.093392 | 0.5568 | 0.42251 |  | L-2-amino-4-((1-<br>[(carboxymethyl)-C-<br>hydroxycarbonyl]oxy)ethyl)-<br>pyrrolidine-2-carboxylic acid | 13.108703  | - | - | - | 180.79   | 542.539849 |
| NEG03316 | 150467.2391 | 132417.4085 | -0.18436 | 0.25556  | 0.6877 | 0.14151 |  | docosatetraenoyl)-glycero-<br>(3-beta,5-alpha,6-alpha,7-alpha,<br>22E,24R)-5,6-<br>epoxyoctanoic acid   | 0.5409878  | - | - | - | 180.7785 | 485.578987 |
| NEG03320 | 136013.1319 | 124717.6306 | -0.12508 | 0.796414 | 0.9301 | 0.01939 |  | Syringolin A                                                                                            | -1.0216787 | - | - | - | 180.755  | 425.623588 |
| NEG03327 | 735936.5363 | 564514.3608 | -0.38257 | 0.183036 | 0.6419 | 0.45168 |  | N2'-Acetylgentamicin C1a                                                                                | 11.39833   | - | - | - | 180.6375 | 492.59475  |
| NEG03329 | 262610.241  | 108685.3436 | -1.27277 | 0.260944 | 0.6904 | 0.45153 |  | 20-Hydroxyleukotriene E4                                                                                | -1.1525437 | - | - | - | 180.634  | 490.571057 |
| NEG03332 | 126380.9479 | 120864.7804 | -0.06439 | 0.820696 | 0.9386 | 0.02499 |  | Sipatrigine                                                                                             | 5.30041    | - | - | - | 180.628  | 454.603138 |
| NEG03338 | 170641.1752 | 142698.4561 | -0.258   | 0.507765 | 0.8067 | 0.12215 |  | Colchicoside                                                                                            | -2.3929662 | - | - | - | 180.624  | 371.671832 |
| NEG03341 | 304644.9861 | 232174.357  | -0.39192 | 0.021648 | 0.3502 | 0.37289 |  | 3-Aza-A-homocholest-4a-<br>en-4-one                                                                     | -19.627857 | - | - | - | 180.614  | 546.532976 |
| NEG03346 | 101030.8654 | 109498.007  | 0.116109 | 0.788487 | 0.9278 | 0.03236 |  | Gitogenin                                                                                               | -9.8262067 | - | - | - | 180.584  | 398.641096 |
| NEG03352 | 69897.57581 | 59079.54008 | -0.24258 | 0.367027 | 0.7403 | 0.11779 |  | Isazofos                                                                                                | -3.4664414 | - | - | - | 180.327  | 431.627124 |
| NEG03353 | 4877286.255 | 4898286.982 | 0.006199 | 0.949351 | 0.9832 | 0.0456  |  | L-2-amino-4-((1-<br>[(carboxymethyl)-C-<br>hydroxycarbonyl]oxy)ethyl)-<br>pyrrolidine-2-carboxylic acid | -18.82664  | - | - | - | 180.316  | 312.728117 |
| NEG03354 | 79743.83553 | 76402.54207 | -0.06175 | 0.730096 | 0.9083 | 0.02463 |  | Benzamil                                                                                                | 23.557715  | - | - | - | 180.309  | 500.554539 |
| NEG03355 | 1040736.606 | 807116.4786 | -0.36676 | 0.189167 | 0.6466 | 0.56323 |  | Flamprop-M                                                                                              | 7.5831045  | - | - | - | 180.308  | 318.744748 |
| NEG03356 | 1295915.592 | 1108426.388 | -0.22546 | 0.045315 | 0.4507 | 0.54831 |  | Pyrrithione zinc                                                                                        | -23.455286 | - | - | - | 180.307  | 320.715877 |
| NEG03359 | 8643382.189 | 8396190.719 | -0.04186 | 0.654916 | 0.8746 | 0.24173 |  | Clobenzorex                                                                                             | 23.901296  | - | - | - | 180.3    | 316.722017 |
| NEG03361 | 24270858.81 | 21779030.33 | -0.15629 | 0.406015 | 0.7584 | 1.33848 |  |                                                                                                         | -12.366128 | - | - | - | 180.287  | 258.763511 |



|          |             |             |          |          |        |         |                                                              |            |   |   |   |          |            |
|----------|-------------|-------------|----------|----------|--------|---------|--------------------------------------------------------------|------------|---|---|---|----------|------------|
| NEG03690 | 250200.8135 | 212928.0537 | -0.23272 | 0.097652 | 0.5586 | 0.22736 | Quinclorac                                                   | -20.07698  | - | - | - | 164.7585 | 241.046064 |
| NEG03714 | 128627.3601 | 102988.5539 | -0.32071 | 0.121588 | 0.5846 | 0.18793 | Bromobenzene-2,3-dihydrodiol                                 | -8.2853511 | - | - | - | 164.0775 | 190.013741 |
| NEG03718 | 184682.3664 | 168495.226  | -0.13234 | 0.337062 | 0.7276 | 0.13698 | dCTP                                                         | -18.860661 | - | - | - | 163.907  | 466.140813 |
| NEG03748 | 161825.4427 | 145040.1334 | -0.15799 | 0.59084  | 0.8433 | 0.11106 | 8-Bromoadenosine                                             | 8.4554696  | - | - | - | 162.921  | 345.13305  |
| NEG03755 | 4512352.65  | 3918797.911 | -0.20347 | 0.206166 | 0.6619 | 0.95157 | Iodide                                                       | 22.207631  | - | - | - | 162.78   | 125.900042 |
| NEG03757 | 9568.645966 | 139907.0081 | 3.87001  | 0.326658 | 0.7209 | 0.3065  | UDP-glucurote                                                | 9.4230002  | - | - | - | 162.722  | 579.283491 |
| NEG03760 | 312668.4438 | 252667.3366 | -0.30739 | 0.279936 | 0.7002 | 0.24479 | Perfluorohexane sulfonic acid                                | -2.9480032 | - | - | - | 162.6405 | 399.106544 |
| NEG03762 | 1272936.712 | 1385901.335 | 0.122664 | 0.467574 | 0.7887 | 0.13287 | Deoxyribose triphosphate                                     | -24.723772 | - | - | - | 162.602  | 373.053675 |
| NEG03770 | 1022762.672 | 1503920.09  | 0.556257 | 0.428215 | 0.7691 | 0.56605 | Dichlormid                                                   | -2.9784538 | - | - | - | 162.4685 | 207.077104 |
| NEG03778 | 174710.5451 | 185411.1954 | 0.085762 | 0.807423 | 0.934  | 0.07175 | o-(2,3-dihydroxybenzoyloxy)-2,4,5-trihydroxyoxan-2           | -14.768776 | - | - | - | 162.355  | 329.232846 |
| NEG03785 | 9761883.089 | 8113609.789 | -0.26682 | 0.003042 | 0.1506 | 1.81247 | Ticlopidine                                                  | 19.390184  | - | - | - | 162.2045 | 262.783538 |
| NEG03799 | 129588.7667 | 117073.8445 | -0.14652 | 0.434299 | 0.77   | 0.09265 | (o-carboxy-2,4,5-trihydroxyoxan-2-yl)((4-(1,3,4-dihydroxy-5  | 7.0017508  | - | - | - | 162.021  | 608.511991 |
| NEG03806 | 1092361.455 | 952236.3337 | -0.19806 | 0.024184 | 0.3593 | 0.50285 | Benzamil                                                     | 8.1689287  | - | - | - | 161.879  | 318.744935 |
| NEG03811 | 188431.6589 | 156610.102  | -0.26686 | 0.03453  | 0.4108 | 0.20586 | Jadomycin B                                                  | -8.3736285 | - | - | - | 161.822  | 548.556522 |
| NEG03812 | 468522.1925 | 384154.3671 | -0.28643 | 0.093365 | 0.5568 | 0.35524 | Lead arsete                                                  | -8.3337007 | - | - | - | 161.816  | 346.116931 |
| NEG03819 | 133667.9448 | 28998.23511 | -2.20462 | 0.273365 | 0.6991 | 0.37618 | 7-Methylguanosine 5'&apos;-phosphate                         | 24.113797  | - | - | - | 161.8065 | 377.256945 |
| NEG03823 | 104942.8881 | 85155.74166 | -0.30143 | 0.201851 | 0.6603 | 0.15239 | ((o-2,4-dihydroxy-4-oxo-8-(3,4,5-trihydroxyoxan-2-yl)2,2,4,5 | 1.3334603  | - | - | - | 161.7665 | 675.543626 |
| NEG03825 | 758449.9952 | 785430.5476 | 0.05043  | 0.912005 | 0.9709 | 0.05168 | Isazofos                                                     | -18.405612 | - | - | - | 161.716  | 312.728249 |
| NEG03827 | 151442.8067 | 123385.6972 | -0.2956  | 0.152449 | 0.6145 | 0.18519 | L-amino-4-((1-[(carboxymethyl)-C-hydroxycarbonylimidyl]2     | -16.902685 | - | - | - | 161.68   | 550.5534   |
| NEG03835 | 309404.2812 | 250210.8183 | -0.30635 | 0.041181 | 0.44   | 0.28274 | Peimine                                                      | -4.276257  | - | - | - | 161.574  | 430.641978 |
| NEG03838 | 1543279.916 | 695378.4165 | -1.15013 | 0.019868 | 0.3429 | 1.18116 | Dehydrogenated ticlopidine                                   | -8.2194156 | - | - | - | 161.504  | 260.760572 |
| NEG03839 | 2350692.218 | 3856119.428 | 0.714064 | 0.157004 | 0.6188 | 1.33475 | Clobenzorex                                                  | -11.90136  | - | - | - | 161.496  | 258.763632 |
| NEG03841 | 134796.4852 | 106638.7465 | -0.33805 | 0.037077 | 0.4235 | 0.20462 | Antimony trisulfide                                          | 15.57025   | - | - | - | 161.491  | 338.713013 |



|          |             |             |          |          |        |         |                                                                                       |            |   |   |   |          |            |
|----------|-------------|-------------|----------|----------|--------|---------|---------------------------------------------------------------------------------------|------------|---|---|---|----------|------------|
| NEG03846 | 775129.1637 | 671669.3544 | -0.20669 | 0.310663 | 0.7175 | 0.35345 | Midazolam                                                                             | 6.025994   | - | - | - | 161.466  | 324.761986 |
| NEG03847 | 182451.112  | 161849.6696 | -0.17286 | 0.218016 | 0.6665 | 0.12616 | Heterocladol                                                                          | 0.5768356  | - | - | - | 161.4265 | 336.716218 |
| NEG03852 | 1462510.108 | 961269.2586 | -0.60543 | 0.144514 | 0.6122 | 0.58031 | Pyrithione zinc                                                                       | 24.281918  | - | - | - | 161.409  | 316.722138 |
| NEG03853 | 58514.48745 | 47511.20536 | -0.30053 | 0.417229 | 0.7646 | 0.09572 | (1 <i>S</i> )-2-(3,4-dihydroxyphenyl)-5,7-dihydroxy-1,4-benzoxazin-3(1 <i>H</i> )-one | -19.913342 | - | - | - | 161.396  | 689.558972 |
| NEG03855 | 230541.8967 | 212079.9477 | -0.12042 | 0.404303 | 0.7582 | 0.104   | Isomigrastatin                                                                        | 14.268602  | - | - | - | 161.372  | 488.600809 |
| NEG03866 | 3572769.013 | 5284208.219 | 0.564645 | 0.147968 | 0.6145 | 1.414   | Orbencarb                                                                             | -21.246178 | - | - | - | 161.169  | 256.766747 |
| NEG03867 | 65657.66508 | 46695.41624 | -0.49168 | 0.05723  | 0.4899 | 0.16849 | DAMGO                                                                                 | 19.269826  | - | - | - | 161.169  | 512.58862  |
| NEG03888 | 128636.2321 | 113695.8818 | -0.17812 | 0.492585 | 0.8005 | 0.10874 | Neocrimarine K                                                                        | 20.231441  | - | - | - | 161.003  | 558.567344 |
| NEG03890 | 56632.419   | 43757.34635 | -0.3721  | 0.282821 | 0.7021 | 0.08131 | 1-O-Galloyl-beta-D-glucose                                                            | -12.918208 | - | - | - | 160.952  | 331.248531 |
| NEG03893 | 674863.73   | 592483.1012 | -0.18782 | 0.133381 | 0.5988 | 0.36002 | Octachlorostyrene                                                                     | -4.5900545 | - | - | - | 160.936  | 378.700581 |
| NEG03899 | 330099.4214 | 265125.753  | -0.31622 | 0.147352 | 0.6145 | 0.27876 | Acrimarine N                                                                          | -23.225445 | - | - | - | 160.8425 | 556.570173 |
| NEG03907 | 255788.7002 | 234615.2285 | -0.12466 | 0.520818 | 0.8144 | 0.13639 | Dimethemid                                                                            | 15.039606  | - | - | - | 160.823  | 274.791671 |
| NEG03909 | 295669.015  | 266069.9902 | -0.15218 | 0.404524 | 0.7582 | 0.17108 | Mibefradil                                                                            | -6.885662  | - | - | - | 160.813  | 494.618011 |
| NEG03918 | 132556.0767 | 90585.07577 | -0.54926 | 0.04398  | 0.4477 | 0.25779 | Cyanidin 3-(6-p-caffeoyl)glucoside                                                    | 24.61606   | - | - | - | 160.759  | 610.534777 |
| NEG03919 | 42421.34102 | 36711.7219  | -0.20855 | 0.602979 | 0.8493 | 0.04792 | TG(16:1(9Z)/22:2(13Z,16Z)/o-18:0)                                                     | 22.400711  | - | - | - | 160.748  | 898.536873 |
| NEG03921 | 111855.0648 | 130993.0322 | 0.227859 | 0.581321 | 0.8399 | 0.05512 | Zygadenine                                                                            | -9.3020869 | - | - | - | 160.74   | 492.620932 |
| NEG03923 | 115524.0489 | 97622.06264 | -0.24291 | 0.182561 | 0.6419 | 0.15287 | 12-Hydroxy-12-octadecanoylcarnitine                                                   | -5.9096475 | - | - | - | 160.73   | 442.650402 |
| NEG03929 | 43408.54381 | 29310.48238 | -0.56656 | 0.116123 | 0.5757 | 0.14732 | Mycalamide B                                                                          | 12.149031  | - | - | - | 160.6985 | 516.608612 |
| NEG03949 | 30190.91226 | 19656.29343 | -0.61912 | 0.017526 | 0.3285 | 0.1333  | Protopaxadiol                                                                         | 22.680095  | - | - | - | 160.504  | 459.735273 |
| NEG03955 | 247636.5498 | 208024.5079 | -0.25147 | 0.421054 | 0.7661 | 0.20264 | Amprevir                                                                              | 18.540537  | - | - | - | 160.443  | 504.628998 |
| NEG03963 | 210752.2159 | 224316.4738 | 0.089988 | 0.806348 | 0.9333 | 0.01495 | TG(18:1(11Z)/22:2(13Z,16Z)/o-18:0)                                                    | -1.7914797 | - | - | - | 160.294  | 926.569062 |
| NEG03965 | 99858.84332 | 71779.45496 | -0.47632 | 0.10845  | 0.5681 | 0.18941 | Lupeol acetate                                                                        | 4.3125962  | - | - | - | 160.283  | 467.748845 |
| NEG03968 | 44170.95381 | 28445.18243 | -0.63491 | 0.015137 | 0.3098 | 0.16876 | (1 <i>S</i> )-2-(3,4-dihydroxyphenyl)-5,7-dihydroxy-1,4-benzoxazin-3(1 <i>H</i> )-one | -1.7820673 | - | - | - | 160.1985 | 577.649292 |

|          |             |             |          |          |        |         |                                                                                                             |            |   |   |   |          |            |
|----------|-------------|-------------|----------|----------|--------|---------|-------------------------------------------------------------------------------------------------------------|------------|---|---|---|----------|------------|
| NEG03971 | 131882.6175 | 109835.9319 | -0.2639  | 0.436251 | 0.7718 | 0.15422 | (24E)-15alpha-Acetoxy-3alpha-hydroxy-23-oxo-7-oxo-11,24-lanosteran                                          | 20.533114  | - | - | - | 160.181  | 525.707538 |
| NEG03977 | 109222.5472 | 177496.7149 | 0.700522 | 0.117178 | 0.5782 | 0.25463 | Zn-Bacteriochlorophyll a                                                                                    | -24.809474 | - | - | - | 160.1455 | 951.57739  |
| NEG03980 | 50005.18003 | 52413.99347 | 0.067874 | 0.791693 | 0.9284 | 0.01078 | 7-Chloro-6-demethylcepharadione B                                                                           | -5.4981916 | - | - | - | 160.127  | 340.735844 |
| NEG03985 | 92726.99032 | 80089.09278 | -0.21138 | 0.531592 | 0.8207 | 0.10822 | 11-[(2R,3S)-3-[(2S)-2-amino-3-methyl-4-(2-methyl-1,3-thiazol-4-yl)but-2-en-1-yl]but-2-en-1-yl]but-2-en-1-yl | -3.9947998 | - | - | - | 160.11   | 523.710627 |
| NEG03986 | 165773.2211 | 132011.613  | -0.32855 | 0.301981 | 0.7148 | 0.19188 | [(carboxymethyl)-C-hydroxycarbonyl]but-2-yn-1-yl                                                            | -22.16921  | - | - | - | 160.11   | 560.590273 |
| NEG03989 | 142712.0792 | 165239.729  | 0.211453 | 0.58106  | 0.8399 | 0.0553  | TG(18:0/22:4(7Z,10Z,13Z,16Z)/0-18:0)                                                                        | -2.097152  | - | - | - | 160.0855 | 924.552782 |
| NEG03991 | 72439.29349 | 75020.28284 | 0.050508 | 0.856447 | 0.9531 | 0.00031 | (2S)-Acetoxy-3alpha,15alpha-tetrahydroxolanosta                                                             | -15.206137 | - | - | - | 160.061  | 527.704584 |
| NEG04000 | 80591.47714 | 29670.02655 | -1.44162 | 0.010537 | 0.2728 | 0.27621 | Sanguisorbic acid dilactone                                                                                 | 8.0726873  | - | - | - | 160.003  | 469.29282  |
| NEG04001 | 79684.60457 | 65428.32996 | -0.28439 | 0.339319 | 0.7277 | 0.12139 | Glucoarabin                                                                                                 | -12.969143 | - | - | - | 159.9605 | 506.62574  |
| NEG04002 | 2845637.044 | 2530715.147 | -0.16921 | 0.008388 | 0.2511 | 0.79037 | Hydroiodic acid                                                                                             | -12.759396 | - | - | - | 159.9545 | 126.903491 |
| NEG04004 | 43403.88064 | 55183.91176 | 0.346424 | 0.480034 | 0.7955 | 0.04938 | TG(20:1(11Z)/0-18:0/20:1(11Z))                                                                              | 3.1589146  | - | - | - | 159.901  | 928.56636  |
| NEG04006 | 1578957.243 | 1427615.905 | -0.14536 | 0.028592 | 0.378  | 0.50183 | Sodium arsenite                                                                                             | -18.310485 | - | - | - | 159.865  | 128.900545 |
| NEG04010 | 39008.11157 | 26945.23032 | -0.53374 | 0.197028 | 0.6557 | 0.12597 | Pancuronium                                                                                                 | 7.9352869  | - | - | - | 159.854  | 571.859169 |
| NEG04027 | 31368.70584 | 22030.66025 | -0.50981 | 0.204839 | 0.6619 | 0.1128  | Ziram                                                                                                       | 15.798616  | - | - | - | 159.539  | 304.839455 |
| NEG04035 | 133256.1926 | 101919.9475 | -0.38677 | 0.36456  | 0.7397 | 0.16562 | TG(15:0/20:4(5Z,8Z,11Z,14Z)/24:1(15Z))                                                                      | 19.325261  | - | - | - | 159.522  | 950.567112 |
| NEG04037 | 65496.37814 | 105127.3412 | 0.682651 | 0.150591 | 0.6145 | 0.17993 | TG(15:0/20:3(5Z,8Z,11Z)/24:1(15Z))                                                                          | 18.200753  | - | - | - | 159.52   | 952.582079 |
| NEG04040 | 204233.6962 | 156083.7492 | -0.3879  | 0.186615 | 0.6464 | 0.19506 | Gold                                                                                                        | -2.998272  | - | - | - | 159.428  | 195.958733 |
| NEG04054 | 3430979.636 | 2786720.148 | -0.30005 | 0.084209 | 0.5411 | 0.91872 | 2-Bromoacetaldehyde                                                                                         | 21.724904  | - | - | - | 159.1215 | 121.943994 |
| NEG04058 | 454011.4666 | 394448.021  | -0.20289 | 0.022392 | 0.354  | 0.33775 | Dedimethylchlorpromazine                                                                                    | -3.6858693 | - | - | - | 159.1215 | 289.802652 |
| NEG04065 | 215887.2258 | 184745.2865 | -0.22474 | 0.133343 | 0.5988 | 0.21383 | Selenophosphoric acid                                                                                       | -1.6465344 | - | - | - | 159.06   | 159.948258 |
| NEG04081 | 33557.33581 | 41395.25113 | 0.302837 | 0.324497 | 0.7202 | 0.05276 | Castasterone                                                                                                | 16.647054  | - | - | - | 158.869  | 463.678159 |
| NEG04087 | 46335.71055 | 36039.2022  | -0.36256 | 0.226765 | 0.671  | 0.10492 | Gorgostane                                                                                                  | 24.039629  | - | - | - | 158.751  | 411.736545 |
| NEG04088 | 200398.8181 | 178750.5767 | -0.16493 | 0.012854 | 0.2932 | 0.20363 | Tetrachlorohydroquinone                                                                                     | -9.5511001 | - | - | - | 158.717  | 246.881256 |

|          |             |             |          |          |        |         |                                                                                    |            |   |   |   |          |            |
|----------|-------------|-------------|----------|----------|--------|---------|------------------------------------------------------------------------------------|------------|---|---|---|----------|------------|
| NEG04090 | 37439.36116 | 32345.20926 | -0.211   | 0.458201 | 0.7822 | 0.06566 | 6alpha-Hydroxy-castasterone                                                        | -23.882123 | - | - | - | 158.713  | 465.675178 |
| NEG04102 | 144172.4499 | 128049.373  | -0.1711  | 0.035507 | 0.4191 | 0.15589 | Dichloroacetonitrile                                                               | 24.239935  | - | - | - | 158.5455 | 108.937388 |
| NEG04104 | 454409.6242 | 403835.7044 | -0.17022 | 0.339027 | 0.7277 | 0.23677 | Panaxydol chlorohydrin                                                             | -17.687099 | - | - | - | 158.5455 | 295.819473 |
| NEG04106 | 54249.31491 | 53225.69383 | -0.02748 | 0.902373 | 0.968  | 0.03517 | Tiron                                                                              | -6.6522061 | - | - | - | 158.5425 | 313.191333 |
| NEG04114 | 152475.8881 | 81389.09356 | -0.90567 | 0.524213 | 0.8163 | 0.14936 | Calcium iodide                                                                     | 1.9530136  | - | - | - | 158.515  | 292.880197 |
| NEG04138 | 490442.3836 | 492125.9139 | 0.004944 | 0.979865 | 0.9946 | 0.03685 | 3-(Dichloromethylene)-2,5-pyrrolidinedione                                         | -20.32721  | - | - | - | 157.924  | 178.978065 |
| NEG04140 | 115142.2898 | 103678.1451 | -0.15131 | 0.510726 | 0.8083 | 0.10685 | Thenylchlor                                                                        | 24.785887  | - | - | - | 157.888  | 322.83835  |
| NEG04151 | 37551.30197 | 58247.5315  | 0.633334 | 0.25257  | 0.6865 | 0.1068  | TG(20:0/22:6(4Z,7Z,10Z,13Z,16Z,19Z)/o-18:0)                                        | 21.595012  | - | - | - | 157.5995 | 948.59723  |
| NEG04158 | 131990.8176 | 139486.5529 | 0.079688 | 0.815168 | 0.9361 | 0.00439 | TG(18:4(6Z,9Z,12Z,15Z)/24:1(15Z)/o-18:0)                                           | 20.898416  | - | - | - | 157.33   | 950.61261  |
| NEG04181 | 5588307.856 | 5092588.692 | -0.13401 | 0.339399 | 0.7277 | 0.59302 | Radon-222                                                                          | 13.069695  | - | - | - | 156.7485 | 220.995625 |
| NEG04183 | 8851981.532 | 6431807.786 | -0.46078 | 0.024246 | 0.3595 | 1.99641 | Dichlorophenylsuccinimide                                                          | -20.061    | - | - | - | 156.68   | 243.061927 |
| NEG04186 | 1723023.545 | 1531237.026 | -0.17024 | 0.360714 | 0.7368 | 0.406   | 2-Iodophenol                                                                       | -7.5060993 | - | - | - | 156.6335 | 218.998872 |
| NEG04205 | 483155.0988 | 439042.0588 | -0.13813 | 0.482621 | 0.7977 | 0.16177 | Radium-224                                                                         | 0.7635647  | - | - | - | 156.4045 | 224.992896 |
| NEG04216 | 151988.6277 | 96236.97641 | -0.6593  | 0.035806 | 0.4191 | 0.28672 | Stearyltrimethylammonium chloride                                                  | 13.11971   | - | - | - | 156.34   | 347.04689  |
| NEG04224 | 4245447.066 | 1589835.462 | -1.41704 | 0.060339 | 0.4986 | 1.91284 | Phosphoramidate mustard                                                            | -19.557617 | - | - | - | 156.273  | 220.010501 |
| NEG04228 | 184776.2812 | 172452.73   | -0.09958 | 0.794868 | 0.9292 | 0.04563 | Perflutren                                                                         | -12.276806 | - | - | - | 156.238  | 187.009715 |
| NEG04237 | 916634.8447 | 835896.5716 | -0.13302 | 0.283543 | 0.7021 | 0.23532 | o-Oxo-2-nyaroxy-(4-chlorophenyl)-2,2,3,3-tetrachloro-3,3,4,4-tetrachloroazobenzene | -18.130264 | - | - | - | 156.137  | 381.008697 |
| NEG04240 | 685345.6793 | 493160.3324 | -0.47478 | 0.045492 | 0.4515 | 0.47866 | Tetrachloroazobenzene                                                              | 3.1715748  | - | - | - | 156.101  | 318.994738 |
| NEG04257 | 3070608.702 | 2596922.622 | -0.24172 | 0.071914 | 0.5226 | 0.79627 | Butefine hydrochloride                                                             | 22.106879  | - | - | - | 155.924  | 352.928648 |
| NEG04275 | 238906.0745 | 203041.3069 | -0.23467 | 0.488936 | 0.7996 | 0.13108 | Triphosphate                                                                       | -7.7935161 | - | - | - | 155.806  | 256.945713 |
| NEG04276 | 421609.5626 | 311631.9697 | -0.43606 | 0.005146 | 0.202  | 0.46743 | Diphosphate                                                                        | 18.809035  | - | - | - | 155.804  | 176.971171 |
| NEG04281 | 82694.17199 | 143874.8642 | 0.798957 | 0.286682 | 0.7033 | 0.19892 | TG(22:1(13Z)/22:6(4Z,7Z,10Z,13Z,16Z,19Z)/o-18:0)                                   | -2.5187903 | - | - | - | 155.7375 | 974.612266 |
| NEG04285 | 241559.9417 | 173801.2182 | -0.47494 | 0.012867 | 0.2932 | 0.34593 | 3,5-Dichloro-2-methylmucote                                                        | 19.919782  | - | - | - | 155.7015 | 224.023306 |

|          |             |             |          |          |        |         |                                                       |            |   |   |   |          |            |
|----------|-------------|-------------|----------|----------|--------|---------|-------------------------------------------------------|------------|---|---|---|----------|------------|
| NEG04287 | 36686.72998 | 43073.55076 | 0.231544 | 0.60904  | 0.8527 | 0.04027 | TG(20:4(5Z,8Z,11Z,14Z)/24:1(15Z)/o-18:0)              | -3.7220749 | - | - | - | 155.669  | 978.643077 |
| NEG04298 | 154258.2635 | 163883.729  | 0.087325 | 0.787179 | 0.927  | 0.03455 | Tetramethylrosamine                                   | 19.113606  | - | - | - | 155.592  | 390.913414 |
| NEG04308 | 262672.6052 | 327554.4953 | 0.318469 | 0.602229 | 0.8489 | 0.19399 | Cloxacillin                                           | 7.136936   | - | - | - | 155.318  | 434.877134 |
| NEG04319 | 143740.3573 | 180689.1598 | 0.330045 | 0.375671 | 0.7438 | 0.12397 | alpha-Amyrin tetratriacontanoate                      | 10.871774  | - | - | - | 155.197  | 916.607299 |
| NEG04320 | 162546.5446 | 198157.7617 | 0.285797 | 0.389134 | 0.7506 | 0.12437 | TG(20:5(5Z,8Z,11Z,14Z,17Z)/24:1(15Z)/o-18:0)          | -2.5174767 | - | - | - | 155.197  | 976.628262 |
| NEG04333 | 447381.9479 | 489954.604  | 0.131141 | 0.406165 | 0.7584 | 0.09947 | Ochratoxin C                                          | -18.331527 | - | - | - | 154.982  | 430.850807 |
| NEG04341 | 310586.5034 | 275118.8531 | -0.17494 | 0.040663 | 0.4381 | 0.25031 | 2,6-Dichloroindophenol                                | 7.1766234  | - | - | - | 154.86   | 267.090147 |
| NEG04362 | 883252.0877 | 522096.8231 | -0.75851 | 0.317487 | 0.7192 | 0.62524 | 11-cis-RetinyI-palmitate                              | -10.039136 | - | - | - | 154.445  | 157.977127 |
| NEG04372 | 38845.01904 | 1           | -15.2454 | 0.059398 | 0.4966 | 0.24829 | UDP-2-deoxyglucose                                    | 10.028719  | - | - | - | 154.183  | 549.300642 |
| NEG04375 | 1060110.302 | 831903.599  | -0.34973 | 0.422483 | 0.7668 | 0.38848 | 12,13-epoxy-9-alkoxy-10E-octadecenoate                | 0.18879    | - | - | - | 154.062  | 156.990753 |
| NEG04387 | 1134787.159 | 952954.8174 | -0.25194 | 0.415663 | 0.7631 | 0.30022 | 3-(Dichloromethylene)-2,5-pyrrolidinedione            | 14.490237  | - | - | - | 153.772  | 178.984331 |
| NEG04396 | 3053605.597 | 5672379.442 | 0.89344  | 0.228962 | 0.6731 | 1.54365 | Phenolic phosphate                                    | -11.42257  | - | - | - | 153.497  | 173.081835 |
| NEG04418 | 1143869.265 | 1471509.469 | 0.363375 | 0.377871 | 0.745  | 0.35406 | Glycerone phosphate                                   | 2.2345245  | - | - | - | 152.937  | 169.050903 |
| NEG04448 | 1326341.859 | 1824542.053 | 0.460082 | 0.029381 | 0.3837 | 0.88608 | 5-Nitrofurfural                                       | -18.64225  | - | - | - | 152.277  | 140.071693 |
| NEG04458 | 1234173.452 | 1089125.784 | -0.18037 | 0.661594 | 0.8779 | 0.15854 | Cyperaquinone                                         | -9.7923232 | - | - | - | 152.1055 | 241.217151 |
| NEG04462 | 853849.4917 | 730510.0654 | -0.22508 | 0.282916 | 0.7021 | 0.38121 | Methyl 2-propenyl selenide                            | -12.193834 | - | - | - | 152.066  | 134.061076 |
| NEG04465 | 15998792.65 | 18755999.54 | 0.229389 | 0.507192 | 0.8067 | 0.89292 | Tetrafluoroethylene                                   | -13.738868 | - | - | - | 152.0345 | 99.0063493 |
| NEG04487 | 359961.0414 | 311418.3887 | -0.20899 | 0.497732 | 0.8016 | 0.20829 | beta-2,3,5,6-Tetrachloro-1,4-cyclohexanediol          | -4.6464584 | - | - | - | 151.6715 | 252.930043 |
| NEG04490 | 5487244.705 | 5306556.178 | -0.04831 | 0.898173 | 0.9668 | 0.19986 | Haloxydine                                            | 12.296797  | - | - | - | 151.6355 | 198.965482 |
| NEG04497 | 476845.5251 | 448803.4485 | -0.08744 | 0.735443 | 0.9109 | 0.14619 | Dihydroxyfumarate                                     | 16.679343  | - | - | - | 151.5555 | 147.066193 |
| NEG04498 | 2036064.198 | 1923058.209 | -0.08238 | 0.874811 | 0.9576 | 0.31408 | 3,4-Dihydroxyphthalate                                | -21.016683 | - | - | - | 151.493  | 197.118159 |
| NEG04501 | 2211051.6   | 2115373.134 | -0.06382 | 0.906745 | 0.9697 | 0.29771 | Barbiturate                                           | -19.542132 | - | - | - | 151.398  | 127.07642  |
| NEG04511 | 1847325.189 | 1498742.54  | -0.30169 | 0.297326 | 0.7146 | 0.57602 | 5-nyuroxy-z-metnyl-z-[(sulfooxy)methyl]propanoic acid | 14.485396  | - | - | - | 151.2595 | 213.185826 |

|          |             |             |          |          |        |         |                                                                              |            |   |   |   |          |            |
|----------|-------------|-------------|----------|----------|--------|---------|------------------------------------------------------------------------------|------------|---|---|---|----------|------------|
| NEG04534 | 1287102.835 | 1198139.831 | -0.10333 | 0.718916 | 0.9041 | 0.26788 | 5-Hydroxyisourate                                                            | 0.6303617  | - | - | - | 150.952  | 183.102539 |
| NEG04539 | 2683922.992 | 2862906.71  | 0.093137 | 0.704351 | 0.8994 | 0.10945 | Glyphosate                                                                   | 4.0591743  | - | - | - | 150.881  | 168.06651  |
| NEG04542 | 1237914.019 | 1260146.946 | 0.025681 | 0.927283 | 0.9759 | 0.05997 | 4-Maleylacetoacetate                                                         | -22.261574 | - | - | - | 150.858  | 199.133768 |
| NEG04552 | 1942350.305 | 1939491.882 | -0.00212 | 0.988684 | 0.9976 | 0.10876 | Chlorthiamid                                                                 | 8.9745222  | - | - | - | 150.7485 | 205.086873 |
| NEG04557 | 2775504.08  | 2664749.444 | -0.05875 | 0.870944 | 0.9571 | 0.21242 | 2-Aminoadenosine                                                             | -1.5632319 | - | - | - | 150.573  | 281.248282 |
| NEG04563 | 2913340.014 | 2488742.876 | -0.22726 | 0.469708 | 0.7897 | 0.67248 | 2-Hydroxyethylphosphate                                                      | 17.361915  | - | - | - | 150.452  | 125.043212 |
| NEG04581 | 4919819.484 | 4707960.228 | -0.0635  | 0.67651  | 0.8854 | 0.46453 | Angelicin                                                                    | -8.9417459 | - | - | - | 150.1975 | 185.154559 |
| NEG04584 | 1051378.459 | 890957.3806 | -0.23885 | 0.486222 | 0.7985 | 0.33683 | 2,3-Di- <i>l</i> -keto-3-methylthiopentyl-1-phosphate                        | 5.6186591  | - | - | - | 150.1515 | 241.180784 |
| NEG04590 | 1271574.893 | 1074509.484 | -0.24294 | 0.110491 | 0.5692 | 0.53527 | Dioxotetrahydropyrimidin-2,4-dithione                                        | -18.43555  | - | - | - | 150.102  | 325.18391  |
| NEG04599 | 6973095.595 | 7115000.937 | 0.029065 | 0.687556 | 0.8902 | 0.01755 | Trimethylselenonium                                                          | 0.4615224  | - | - | - | 150.057  | 123.056381 |
| NEG04603 | 11627161.99 | 14526793.24 | 0.321217 | 0.553212 | 0.8299 | 0.56433 | 2,5-Dioxopentanoate                                                          | 5.2094544  | - | - | - | 150      | 129.092101 |
| NEG04606 | 3278888.446 | 3117606.633 | -0.07277 | 0.793569 | 0.929  | 0.26517 | Cacodylate                                                                   | 7.4316846  | - | - | - | 149.873  | 136.991149 |
| NEG04613 | 1973880.481 | 4131060.98  | 1.065478 | 0.038821 | 0.4324 | 1.75701 | sn-Glycerol 3-phosphate                                                      | -1.2217795 | - | - | - | 149.744  | 171.066213 |
| NEG04624 | 11334842.83 | 10649216.55 | -0.09002 | 0.623839 | 0.8594 | 0.79492 | N-Benzoyl-4-hydroxyanthranilate                                              | 7.6044265  | - | - | - | 149.517  | 256.23608  |
| NEG04633 | 5443542.051 | 4348503.504 | -0.32403 | 0.075716 | 0.5279 | 1.37784 | Diamidafos                                                                   | 13.511671  | - | - | - | 149.2395 | 199.170228 |
| NEG04636 | 2681641.29  | 2359542.816 | -0.18461 | 0.423601 | 0.7672 | 0.58152 | Pemirrolast                                                                  | -5.9569222 | - | - | - | 149.207  | 227.201464 |
| NEG04644 | 1759671.696 | 1512255.181 | -0.2186  | 0.181542 | 0.6415 | 0.5502  | 3-(Phosphoacetylamido)-L-alanine                                             | 10.221078  | - | - | - | 149.086  | 241.118998 |
| NEG04646 | 1495725.839 | 1526671.006 | 0.029543 | 0.925842 | 0.9755 | 0.03846 | Meconic acid                                                                 | 11.174645  | - | - | - | 149.056  | 199.097459 |
| NEG04653 | 500231.7228 | 509075.8256 | 0.025284 | 0.94094  | 0.9803 | 0.00709 | Propyzamide                                                                  | 3.0691971  | - | - | - | 148.9735 | 255.12131  |
| NEG04655 | 4269509.363 | 3185848.548 | -0.42239 | 0.827726 | 0.9421 | 0.73316 | Disodium malate                                                              | -19.250224 | - | - | - | 148.964  | 177.040396 |
| NEG04660 | 6303493.169 | 5917015.684 | -0.09128 | 0.763332 | 0.9201 | 0.66287 | 3-fluorocyclohexanone-cis,cis-1,2-diol-1-phosphate                           | -6.1466709 | - | - | - | 148.788  | 173.118153 |
| NEG04663 | 2598858.13  | 2544203.634 | -0.03066 | 0.911934 | 0.9709 | 0.12121 | (1 <i>S</i> ,3 <i>R</i> )-3-(2,2-dichloroethenyl)-2,2-dimethylsuccinonitrile | -5.357074  | - | - | - | 148.692  | 208.061403 |
| NEG04664 | 1594370.031 | 1443133.483 | -0.14378 | 0.507373 | 0.8067 | 0.33688 | Arbutin 6-phosphate                                                          | -9.5255468 | - | - | - | 148.677  | 351.220468 |

|          |             |             |          |          |        |         |                                                                                                                                                                                                                                                                                                                                                                                                                                                                                                                                                                                                                                                                                                                     |            |   |   |   |          |            |
|----------|-------------|-------------|----------|----------|--------|---------|---------------------------------------------------------------------------------------------------------------------------------------------------------------------------------------------------------------------------------------------------------------------------------------------------------------------------------------------------------------------------------------------------------------------------------------------------------------------------------------------------------------------------------------------------------------------------------------------------------------------------------------------------------------------------------------------------------------------|------------|---|---|---|----------|------------|
| NEG04673 | 1160833.485 | 1567066.946 | 0.432906 | 0.107571 | 0.5681 | 0.53391 | Bromobenzene                                                                                                                                                                                                                                                                                                                                                                                                                                                                                                                                                                                                                                                                                                        | 4.4548187  | - | - | - | 148.194  | 156.001323 |
| NEG04678 | 1253649.298 | 1645951.176 | 0.392788 | 0.281032 | 0.7009 | 0.65078 | O-Phosphorylhydroxylamine                                                                                                                                                                                                                                                                                                                                                                                                                                                                                                                                                                                                                                                                                           | 13.126599  | - | - | - | 148.027  | 112.004007 |
| NEG04693 | 13971294.67 | 13757375.23 | -0.02226 | 0.873855 | 0.9573 | 0.2394  | Glyoxylate                                                                                                                                                                                                                                                                                                                                                                                                                                                                                                                                                                                                                                                                                                          | 16.754525  | - | - | - | 146.955  | 73.0294638 |
| NEG04703 | 147242.536  | 150901.116  | 0.035409 | 0.917447 | 0.9728 | 0.01256 | Streptomycin 6-phosphate                                                                                                                                                                                                                                                                                                                                                                                                                                                                                                                                                                                                                                                                                            | -21.458635 | - | - | - | 146.09   | 660.532527 |
| NEG04716 | 1963916.192 | 2784737.457 | 0.503808 | 0.368674 | 0.7408 | 0.86384 | Ferrous lactate                                                                                                                                                                                                                                                                                                                                                                                                                                                                                                                                                                                                                                                                                                     | -12.028175 | - | - | - | 144.719  | 232.974909 |
| NEG04724 | 1568132.372 | 5269196.865 | 1.748536 | 0.049375 | 0.4711 | 1.88575 | Dihydrogen phosphate                                                                                                                                                                                                                                                                                                                                                                                                                                                                                                                                                                                                                                                                                                | 2.5261622  | - | - | - | 144.5895 | 95.9801684 |
| NEG04736 | 399672.1041 | 387558.1416 | -0.0444  | 0.85579  | 0.9527 | 0.10778 | Sodium L-ascorbic acid 2-phosphate                                                                                                                                                                                                                                                                                                                                                                                                                                                                                                                                                                                                                                                                                  | 21.370955  | - | - | - | 144.434  | 324.072971 |
| NEG04750 | 74842.50711 | 54098.64873 | -0.46827 | 0.016732 | 0.3228 | 0.1918  | Norbadione A                                                                                                                                                                                                                                                                                                                                                                                                                                                                                                                                                                                                                                                                                                        | -9.3228314 | - | - | - | 143.7205 | 677.494798 |
| NEG04766 | 1117314.642 | 1008610.768 | -0.14767 | 0.161236 | 0.6225 | 0.35388 | L-(1,2,4,5-tetrahydroxy-2-hydroxyethyl)-D-xylose                                                                                                                                                                                                                                                                                                                                                                                                                                                                                                                                                                                                                                                                    | 11.896253  | - | - | - | 142.4475 | 688.491926 |
| NEG04775 | 61182.00186 | 55659.32915 | -0.13648 | 0.543481 | 0.8268 | 0.04883 | Agrocin 84                                                                                                                                                                                                                                                                                                                                                                                                                                                                                                                                                                                                                                                                                                          | 4.0101848  | - | - | - | 141.958  | 701.494941 |
| NEG04781 | 144835.4891 | 90748.9522  | -0.67446 | 0.06746  | 0.5163 | 0.24871 | 1-O-Galloyl-beta-D-glucose                                                                                                                                                                                                                                                                                                                                                                                                                                                                                                                                                                                                                                                                                          | -12.649365 | - | - | - | 141.6725 | 331.248621 |
| NEG04784 | 385004.3229 | 331760.0186 | -0.21473 | 0.093959 | 0.5568 | 0.25201 | N(omega)-(ADP-D-ribose)-L-arginine                                                                                                                                                                                                                                                                                                                                                                                                                                                                                                                                                                                                                                                                                  | 18.849753  | - | - | - | 140.975  | 714.50761  |
| NEG04785 | 131219.1915 | 109830.7249 | -0.2567  | 0.077332 | 0.5298 | 0.16146 | 2,6-dihydroxy-4-(1-hydroxyethyl)-5-hydroxymethyl-2,5-dihydrostreptomycin                                                                                                                                                                                                                                                                                                                                                                                                                                                                                                                                                                                                                                            | -16.624978 | - | - | - | 140.904  | 715.510811 |
| NEG04786 | 118603.1871 | 81834.13445 | -0.53537 | 0.010652 | 0.2735 | 0.25678 | 3-oxo-6-oxo-8-oxo-2-oxo-4-oxo-5-oxo-7-oxo-8-oxo-9-oxo-10-oxo-11-oxo-12-oxo-13-oxo-14-oxo-15-oxo-16-oxo-17-oxo-18-oxo-19-oxo-20-oxo-21-oxo-22-oxo-23-oxo-24-oxo-25-oxo-26-oxo-27-oxo-28-oxo-29-oxo-30-oxo-31-oxo-32-oxo-33-oxo-34-oxo-35-oxo-36-oxo-37-oxo-38-oxo-39-oxo-40-oxo-41-oxo-42-oxo-43-oxo-44-oxo-45-oxo-46-oxo-47-oxo-48-oxo-49-oxo-50-oxo-51-oxo-52-oxo-53-oxo-54-oxo-55-oxo-56-oxo-57-oxo-58-oxo-59-oxo-60-oxo-61-oxo-62-oxo-63-oxo-64-oxo-65-oxo-66-oxo-67-oxo-68-oxo-69-oxo-70-oxo-71-oxo-72-oxo-73-oxo-74-oxo-75-oxo-76-oxo-77-oxo-78-oxo-79-oxo-80-oxo-81-oxo-82-oxo-83-oxo-84-oxo-85-oxo-86-oxo-87-oxo-88-oxo-89-oxo-90-oxo-91-oxo-92-oxo-93-oxo-94-oxo-95-oxo-96-oxo-97-oxo-98-oxo-99-oxo-100-oxo | -5.3748293 | - | - | - | 140.094  | 742.538427 |
| NEG04796 | 11432188.03 | 11203913.34 | -0.0291  | 0.855022 | 0.9527 | 0.24143 | Nitrogen mustard                                                                                                                                                                                                                                                                                                                                                                                                                                                                                                                                                                                                                                                                                                    | -1.6024249 | - | - | - | 137.662  | 155.045973 |
| NEG04799 | 98963.2224  | 86040.61307 | -0.20187 | 0.525314 | 0.8163 | 0.12707 | Cyclohexa-1,5-diene-1-carbonyl-CoA                                                                                                                                                                                                                                                                                                                                                                                                                                                                                                                                                                                                                                                                                  | -12.934879 | - | - | - | 137.568  | 872.637523 |
| NEG04805 | 1512500.843 | 1611776.871 | 0.091716 | 0.766723 | 0.9214 | 0.00106 | 2,4-DB                                                                                                                                                                                                                                                                                                                                                                                                                                                                                                                                                                                                                                                                                                              | -14.014622 | - | - | - | 136.6185 | 248.079832 |
| NEG04807 | 964040.0008 | 883376.2352 | -0.12606 | 0.148675 | 0.6145 | 0.26591 | (1E,5E)-4-hydroxybuta-1,3-diene-1,2,4-tricarboxylate                                                                                                                                                                                                                                                                                                                                                                                                                                                                                                                                                                                                                                                                | 10.416871  | - | - | - | 136.4295 | 201.113129 |
| NEG04816 | 596861.3072 | 567101.249  | -0.07379 | 0.479729 | 0.7954 | 0.15119 | Disodium malate                                                                                                                                                                                                                                                                                                                                                                                                                                                                                                                                                                                                                                                                                                     | -19.447941 | - | - | - | 135.717  | 177.040361 |
| NEG04819 | 228482.2781 | 179438.2377 | -0.34859 | 0.284508 | 0.7021 | 0.22579 | 5-oxo-5-oxo-6-oxo-7-oxo-8-oxo-9-oxo-10-oxo-11-oxo-12-oxo-13-oxo-14-oxo-15-oxo-16-oxo-17-oxo-18-oxo-19-oxo-20-oxo-21-oxo-22-oxo-23-oxo-24-oxo-25-oxo-26-oxo-27-oxo-28-oxo-29-oxo-30-oxo-31-oxo-32-oxo-33-oxo-34-oxo-35-oxo-36-oxo-37-oxo-38-oxo-39-oxo-40-oxo-41-oxo-42-oxo-43-oxo-44-oxo-45-oxo-46-oxo-47-oxo-48-oxo-49-oxo-50-oxo-51-oxo-52-oxo-53-oxo-54-oxo-55-oxo-56-oxo-57-oxo-58-oxo-59-oxo-60-oxo-61-oxo-62-oxo-63-oxo-64-oxo-65-oxo-66-oxo-67-oxo-68-oxo-69-oxo-70-oxo-71-oxo-72-oxo-73-oxo-74-oxo-75-oxo-76-oxo-77-oxo-78-oxo-79-oxo-80-oxo-81-oxo-82-oxo-83-oxo-84-oxo-85-oxo-86-oxo-87-oxo-88-oxo-89-oxo-90-oxo-91-oxo-92-oxo-93-oxo-94-oxo-95-oxo-96-oxo-97-oxo-98-oxo-99-oxo-100-oxo                   | -8.3338094 | - | - | - | 134.462  | 335.163922 |
| NEG04825 | 7396334.58  | 6372494.138 | -0.21495 | 0.438107 | 0.7731 | 0.74434 | Tetrafluoroethylene                                                                                                                                                                                                                                                                                                                                                                                                                                                                                                                                                                                                                                                                                                 | -13.648064 | - | - | - | 133.715  | 99.0063584 |
| NEG04827 | 2120160.974 | 2602253.006 | 0.295587 | 0.382874 | 0.7477 | 0.51044 | 5-fluorocyclohexadiene-cis,cis-1,2-diol-1-carboxylate                                                                                                                                                                                                                                                                                                                                                                                                                                                                                                                                                                                                                                                               | -6.115696  | - | - | - | 133.451  | 173.118158 |
| NEG04832 | 168397.6421 | 142291.0678 | -0.24303 | 0.235981 | 0.6796 | 0.14626 | (R)-5-Diphosphomevalote                                                                                                                                                                                                                                                                                                                                                                                                                                                                                                                                                                                                                                                                                             | 24.199938  | - | - | - | 132.272  | 307.11708  |

|          |             |             |          |          |        |         |                                                        |            |   |   |   |          |            |
|----------|-------------|-------------|----------|----------|--------|---------|--------------------------------------------------------|------------|---|---|---|----------|------------|
| NEG04836 | 380516.8391 | 259682.2785 | -0.55121 | 0.015305 | 0.31   | 0.46125 | 2,4-Dihydroxypteridine                                 | -9.2434786 | - | - | - | 131.691  | 163.112806 |
| NEG04837 | 1842857.241 | 1472243.245 | -0.32393 | 0.108567 | 0.5681 | 0.66014 | Haloxidine                                             | 12.35717   | - | - | - | 131.567  | 198.965494 |
| NEG04861 | 1222421.624 | 1164725.253 | -0.06975 | 0.701962 | 0.8994 | 0.25226 | 2,4-Dioxotetrahydropyrimidin<br>a-D-ribonucleotide     | -18.473252 | - | - | - | 128.6225 | 325.183897 |
| NEG04869 | 232481.1773 | 316446.7616 | 0.444849 | 0.081551 | 0.5377 | 0.31554 | Chlorobenzilate                                        | -0.9931497 | - | - | - | 127.732  | 324.179    |
| NEG04881 | 292822.6868 | 287253.1595 | -0.0277  | 0.955611 | 0.986  | 0.01533 | Phosphocreatine                                        | -11.012209 | - | - | - | 127.0325 | 210.103499 |
| NEG04891 | 135978.0453 | 40351.71189 | -1.75267 | 0.094079 | 0.5568 | 0.2893  | Tetracozole                                            | -16.666326 | - | - | - | 126.062  | 371.132121 |
| NEG04896 | 548650.9855 | 565842.6055 | 0.044512 | 0.872424 | 0.9572 | 0.01952 | thymidine 3'-monophosphate                             | 10.612733  | - | - | - | 125.653  | 319.191122 |
| NEG04901 | 1259733.399 | 1588270.423 | 0.334338 | 0.134328 | 0.5997 | 0.62094 | Pydanon                                                | 16.114359  | - | - | - | 124.9415 | 187.133855 |
| NEG04908 | 5534632.155 | 3833656.554 | -0.52977 | 0.342961 | 0.7298 | 1.43226 | 2,4-DB                                                 | -13.975843 | - | - | - | 124.236  | 248.079842 |
| NEG04912 | 552926.867  | 565714.3079 | 0.032985 | 0.903497 | 0.9686 | 0.03339 | Arbutin 6-phosphate                                    | -9.3073093 | - | - | - | 123.803  | 351.220545 |
| NEG04918 | 442243.7948 | 282799.9262 | -0.64506 | 0.12796  | 0.5924 | 0.49586 | Dichlofenthion                                         | 5.7958302  | - | - | - | 123.006  | 314.14775  |
| NEG04921 | 942628.3988 | 800185.6889 | -0.23635 | 0.457702 | 0.7822 | 0.4095  | Lamotrigine                                            | 15.281293  | - | - | - | 122.5735 | 255.087637 |
| NEG04928 | 68365.13132 | 57943.06536 | -0.23862 | 0.316923 | 0.7189 | 0.07097 | 2,3,4,7,8,9,10,22,23,28-decahydroxy-14-(hydroxymethyl) | 19.59663   | - | - | - | 122.135  | 755.541549 |
| NEG04942 | 3720260.363 | 3588699.364 | -0.05194 | 0.911984 | 0.9709 | 0.18658 | Dihydrogen phosphate                                   | 2.6200492  | - | - | - | 120.823  | 95.9801775 |
| NEG04951 | 1115807.326 | 1273139.453 | 0.190303 | 0.111652 | 0.5702 | 0.41314 | O-Phosphorylhydroxylamine                              | 13.267964  | - | - | - | 120.219  | 112.004023 |
| NEG04958 | 1500427.393 | 1666453.833 | 0.151408 | 0.222512 | 0.6692 | 0.47199 | Cacodylate                                             | 7.6976542  | - | - | - | 119.803  | 136.991186 |
| NEG04965 | 743365.7915 | 476130.315  | -0.64272 | 0.229677 | 0.6734 | 0.45014 | Butefine hydrochloride                                 | 22.113011  | - | - | - | 119.655  | 352.92865  |
| NEG04975 | 849531.4596 | 869740.5049 | 0.033918 | 0.736751 | 0.9115 | 0.00233 | Bromobenzene                                           | 4.4725728  | - | - | - | 119.2495 | 156.001326 |
| NEG05000 | 457504.8253 | 371357.4459 | -0.30098 | 0.474428 | 0.7921 | 0.24091 | Selenomethionine Selenoxide                            | -6.5140875 | - | - | - | 117.591  | 211.097042 |
| NEG05005 | 1274001.356 | 1332905.039 | 0.065207 | 0.418873 | 0.7657 | 0.18306 | (1E,3E)-4-Hydroxybuta-1,3-diene-1,2,4-tricarboxylate   | 10.574468  | - | - | - | 117.486  | 201.113161 |
| NEG05028 | 387589.0319 | 434567.3801 | 0.165052 | 0.392402 | 0.7513 | 0.16211 | Shikimate 3-phosphate                                  | -1.7516882 | - | - | - | 113.997  | 253.123478 |
| NEG05032 | 1852346.347 | 1922231.498 | 0.053428 | 0.563104 | 0.8325 | 0.17858 | 3-Fluorocyclohexadiene-cis,cis-1,2-diol-1-carboxylate  | -6.1153823 | - | - | - | 113.038  | 173.118159 |
| NEG05040 | 1836048.2   | 1399987.333 | -0.39119 | 0.00626  | 0.2196 | 0.90683 | Pydanon                                                | 16.029015  | - | - | - | 112.6245 | 187.133839 |

|          |             |             |          |          |        |         |  |                                                           |            |   |   |   |          |            |
|----------|-------------|-------------|----------|----------|--------|---------|--|-----------------------------------------------------------|------------|---|---|---|----------|------------|
| NEG05044 | 1318679.327 | 1278948.064 | -0.04414 | 0.686563 | 0.89   | 0.14437 |  | 5-Hydroxyisourate                                         | 0.4707611  | - | - | - | 112.5735 | 183.10251  |
| NEG05045 | 876532.5527 | 119288.7911 | -2.87735 | 0.011783 | 0.2831 | 1.14366 |  | 3',5'-Cyclic IMP                                          | -23.8464   | - | - | - | 112.324  | 329.17555  |
| NEG05046 | 260811.6494 | 139528.1126 | -0.90245 | 0.323717 | 0.7192 | 0.24739 |  | 5,6-Dihydrouracil                                         | 16.388536  | - | - | - | 112.2975 | 113.097193 |
| NEG05048 | 4259787.166 | 5443023.917 | 0.353627 | 0.231272 | 0.6747 | 0.87991 |  | Tetrafluoroethylene                                       | -13.533417 | - | - | - | 112.045  | 99.0063699 |
| NEG05059 | 54571.63975 | 90080.03431 | 0.723056 | 0.352059 | 0.7325 | 0.18212 |  | Deoxydihydrostreptomycin 6,2'-anhydro-6-epi-              | 11.859471  | - | - | - | 110.874  | 726.551652 |
| NEG05067 | 785408.895  | 643430.53   | -0.28766 | 0.247723 | 0.6846 | 0.38385 |  | Meconic acid                                              | 11.142537  | - | - | - | 109.85   | 199.097453 |
| NEG05072 | 325836.7635 | 185288.2962 | -0.81438 | 0.15315  | 0.6159 | 0.44917 |  | 3-Phospho-D-glycerate                                     | -23.700788 | - | - | - | 109.499  | 185.045514 |
| NEG05073 | 6265699.256 | 5981571.178 | -0.06695 | 0.941182 | 0.9804 | 0.70704 |  | Disodium malate                                           | -18.495725 | - | - | - | 109.484  | 177.04053  |
| NEG05074 | 77742.30779 | 57407.82735 | -0.43745 | 0.252989 | 0.6865 | 0.12322 |  | epigallocatechin-(4beta-&gt;8)-epicatechin-3-O-           | -19.628576 | - | - | - | 109.3415 | 745.601968 |
| NEG05082 | 149041.3652 | 122537.5829 | -0.28249 | 0.114345 | 0.5743 | 0.18778 |  | Delphinidin 3-O-beta-D-glucoside                          | -24.281627 | - | - | - | 107.755  | 758.613778 |
| NEG05092 | 1372572.659 | 963503.0486 | -0.51052 | 0.242477 | 0.6822 | 0.71951 |  | 2-Amino-5-phosphopentanoic acid                           | 6.7246557  | - | - | - | 106.715  | 196.120249 |
| NEG05094 | 563412.2111 | 559483.0037 | -0.0101  | 0.965772 | 0.9897 | #####   |  | 2-Methacryloyloxyethyl phenyl phosphate                   | -12.274015 | - | - | - | 106.351  | 285.20691  |
| NEG05095 | 390965.6528 | 349657.5255 | -0.1611  | 0.451952 | 0.7814 | 0.19889 |  | S-methyl-5-thio-D-ribose 1-phosphate(2-)                  | 11.669493  | - | - | - | 106.0215 | 257.175736 |
| NEG05099 | 122370.4571 | 109660.5757 | -0.15821 | 0.513864 | 0.811  | 0.10843 |  | (1S)-1-(2S)-1(6-carboxy-3,4,5-trihydroxyoxan-2-yl)ethanol | -3.3044433 | - | - | - | 105.371  | 786.645121 |
| NEG05100 | 534210.1368 | 161049.1521 | -1.72991 | 0.013088 | 0.2953 | 0.83352 |  | Purine mononucleotide                                     | -24.447796 | - | - | - | 105.37   | 331.191202 |
| NEG05102 | 8881521.248 | 7652732.087 | -0.21483 | 0.159919 | 0.6215 | 1.3189  |  | Trimethylseleniumium                                      | 0.5274113  | - | - | - | 105.342  | 123.056389 |
| NEG05103 | 845466.0571 | 662509.2614 | -0.35181 | 0.217164 | 0.6662 | 0.49371 |  | Formylphosphote                                           | -19.558177 | - | - | - | 105.298  | 108.996472 |
| NEG05104 | 1179340.913 | 1087135.652 | -0.11745 | 0.658705 | 0.8769 | 0.29458 |  | cis-(Homo)2-aconitate                                     | -23.107891 | - | - | - | 105.1675 | 201.149452 |
| NEG05105 | 240623.5872 | 175802.6255 | -0.45282 | 0.129032 | 0.5925 | 0.24957 |  | 2,4-Dichlorophenolindophenol sodium salt                  | 6.0234164  | - | - | - | 105.012  | 289.071771 |
| NEG05107 | 1407097.279 | 1142745.753 | -0.30022 | 0.395813 | 0.7526 | 0.46284 |  | Diethylphosphoric acid                                    | -14.626545 | - | - | - | 104.9965 | 153.091969 |
| NEG05114 | 584492.788  | 569041.2459 | -0.03865 | 0.899026 | 0.967  | 0.03509 |  | Wedelolactone                                             | -2.8989706 | - | - | - | 104.975  | 313.238212 |
| NEG05117 | 214613.678  | 144754.4228 | -0.56813 | 0.106103 | 0.5677 | 0.32273 |  | Sevoflurane                                               | 18.45388   | - | - | - | 104.622  | 199.051215 |
| NEG05118 | 86339.26526 | 79256.80457 | -0.12348 | 0.523978 | 0.8163 | 0.0854  |  | Delphinidin 3-lathyroside 5-(6-acetylglucoside)           | -9.9156276 | - | - | - | 104.6215 | 800.660874 |



|          |             |             |          |          |        |         |                                                                                         |            |   |   |   |          |            |
|----------|-------------|-------------|----------|----------|--------|---------|-----------------------------------------------------------------------------------------|------------|---|---|---|----------|------------|
| NEG05124 | 1731019.959 | 1420883.165 | -0.28483 | 0.362016 | 0.7382 | 0.55291 | 4-Maleylacetoacetate                                                                    | -21.796044 | - | - | - | 104.289  | 199.133861 |
| NEG05125 | 1607398.516 | 1588814.091 | -0.01678 | 0.949466 | 0.9832 | 0.06457 | Dihydrogen phosphate                                                                    | 2.6252062  | - | - | - | 104.283  | 95.980178  |
| NEG05128 | 523739.0535 | 879478.2185 | 0.7478   | 0.276882 | 0.6995 | 0.60091 | 4-nitrophenolate                                                                        | 10.021502  | - | - | - | 104.263  | 137.097107 |
| NEG05150 | 191920.9148 | 186042.6098 | -0.04488 | 0.959061 | 0.9873 | 0.10187 | O-Phospho-L-serine                                                                      | 9.975715   | - | - | - | 102.882  | 184.06707  |
| NEG05153 | 858329.4625 | 843740.6243 | -0.02473 | 0.675334 | 0.8854 | 0.09804 | Pydanon                                                                                 | 16.121192  | - | - | - | 102.1725 | 187.133856 |
| NEG05154 | 2339391.214 | 1459323.613 | -0.68083 | 0.134714 | 0.5997 | 1.00939 | Arbutin 6-phosphate                                                                     | -9.4794733 | - | - | - | 101.8445 | 351.220484 |
| NEG05169 | 271172.5396 | 114230.0439 | -1.24727 | 0.000169 | 0.0947 | 0.56673 | 3-Deoxy-D-manno-<br>octulosate 8-phosphate                                              | -14.261213 | - | - | - | 100.477  | 317.160086 |
| NEG05170 | 1358976.333 | 1380836.012 | 0.023022 | 0.859657 | 0.9535 | 0.01703 | Fosetyl                                                                                 | -7.7684377 | - | - | - | 100.475  | 109.040768 |
| NEG05174 | 1399701.756 | 108351.8176 | -3.69132 | 0.014383 | 0.3082 | 1.53914 | 3',5'-Cyclic<br>IMP                                                                     | -23.804419 | - | - | - | 100.434  | 329.175563 |
| NEG05187 | 146360.737  | 139184.2087 | -0.07253 | 0.644051 | 0.8698 | 0.08297 | Erythrityl Tetranitrate                                                                 | 3.7286932  | - | - | - | 98.7149  | 301.10385  |
| NEG05188 | 678197.9596 | 635646.6435 | -0.09348 | 0.446216 | 0.7781 | 0.20895 | Bromobenzene                                                                            | 4.3779961  | - | - | - | 98.4107  | 156.001311 |
| NEG05197 | 742996.3404 | 984640.5489 | 0.406242 | 0.039861 | 0.438  | 0.60104 | 3-O-Methylquercetin                                                                     | -4.5895794 | - | - | - | 97.3345  | 315.253572 |
| NEG05203 | 62888.05856 | 95258.46567 | 0.599061 | 0.254011 | 0.6867 | 0.14442 | 2-(3,4-dimethoxy-5-<br>methoxyphenyl)-3,5,7-<br>trihydroxy-2,4-dihydro-1-<br>benzoxan-1 | -18.515998 | - | - | - | 96.627   | 316.257049 |
| NEG05210 | 1096958.959 | 1191186.63  | 0.11889  | 0.541498 | 0.8268 | 0.15739 | Dioxotetrahydropyrimidin<br>5-D-ribonucleotide                                          | -18.217289 | - | - | - | 96.249   | 325.183981 |
| NEG05225 | 698305.926  | 869973.7612 | 0.317113 | 0.345331 | 0.7309 | 0.29826 | dTDP-4-dehydro-beta-L-<br>rhamnose                                                      | -18.819733 | - | - | - | 93.85005 | 545.296142 |
| NEG05227 | 157550.5668 | 225487.9236 | 0.517235 | 0.215449 | 0.6643 | 0.21911 | CDP-4-dehydro-6-deoxy-<br>D-glucose                                                     | 9.3110913  | - | - | - | 93.68095 | 546.299519 |
| NEG05228 | 114550.6777 | 135419.7343 | 0.241452 | 0.460197 | 0.7836 | 0.09205 | Diflunisal                                                                              | -19.012102 | - | - | - | 93.66315 | 249.185567 |
| NEG05234 | 334097.5007 | 515589.501  | 0.625954 | 0.068343 | 0.5185 | 0.45784 | Se-<br>Methylselenomethionine                                                           | 10.177104  | - | - | - | 91.768   | 210.135772 |
| NEG05236 | 276941.6417 | 343377.9668 | 0.310215 | 0.367532 | 0.7403 | 0.16848 | dTDP-6-deoxy-beta-L-<br>talose                                                          | -18.430988 | - | - | - | 91.761   | 547.312217 |
| NEG05238 | 465008.7571 | 442338.0711 | -0.07211 | 0.343851 | 0.7301 | 0.1731  | Fenpiclonil                                                                             | 6.6697484  | - | - | - | 91.4155  | 236.079005 |
| NEG05241 | 1185721.178 | 301131.7908 | -1.9773  | 0.03515  | 0.4158 | 1.18466 | 2,2-bis(4-<br>hydroxyphenyl)hexafluoro-<br>propane                                      | 1.9667176  | - | - | - | 91.0705  | 335.222485 |
| NEG05246 | 371690.4583 | 420740.4576 | 0.178829 | 0.322794 | 0.7192 | 0.19659 | Flupropate                                                                              | 23.675169  | - | - | - | 90.7169  | 145.036581 |
| NEG05250 | 898606.0444 | 251436.4643 | -1.83749 | 0.028115 | 0.3761 | 1.08056 | Dichlofenthion                                                                          | 6.0000443  | - | - | - | 90.3733  | 314.147814 |

|          |             |             |          |          |        |         |                                                    |            |   |   |   |          |            |
|----------|-------------|-------------|----------|----------|--------|---------|----------------------------------------------------|------------|---|---|---|----------|------------|
| NEG05256 | 148950.3882 | 116229.9592 | -0.35785 | 0.154684 | 0.6173 | 0.16464 | L-(Hydroxymethyl)-D-(acetamidomethylene)succinate  | -1.5283621 | - | - | - | 90.0367  | 216.168391 |
| NEG05261 | 171218.2604 | 116954.8824 | -0.54988 | 0.094256 | 0.5568 | 0.28299 | Ellagic acid                                       | -15.911076 | - | - | - | 89.8436  | 301.180515 |
| NEG05273 | 3488295.292 | 5343876.112 | 0.615364 | 0.608823 | 0.8525 | 0.86958 | 5-Hydroxyisourate                                  | 0.3944486  | - | - | - | 88.9836  | 183.102496 |
| NEG05274 | 378196.4376 | 458364.24   | 0.277359 | 0.616161 | 0.8567 | 0.13669 | L-Threonylcarbamoyladenylate                       | -10.536777 | - | - | - | 88.8089  | 491.322136 |
| NEG05298 | 285972.8916 | 274668.5781 | -0.05819 | 0.858118 | 0.9533 | 0.06431 | CGH 2466                                           | 4.9756933  | - | - | - | 85.6852  | 321.206727 |
| NEG05307 | 4445366.606 | 3413728.344 | -0.38095 | 0.33194  | 0.7237 | 0.88425 | Barbiturate                                        | -19.507648 | - | - | - | 84.23065 | 127.076425 |
| NEG05313 | 92678.52087 | 74315.13293 | -0.31858 | 0.179114 | 0.6387 | 0.13251 | Propane-1,2-diol 1-phosphate                       | 10.852826  | - | - | - | 84.13205 | 155.068717 |
| NEG05314 | 208489.9392 | 265563.3821 | 0.349078 | 0.264414 | 0.6923 | 0.16491 | 3-Phospho-D-glycerate                              | -23.802896 | - | - | - | 84.1247  | 185.045495 |
| NEG05316 | 4586967.248 | 4086685.582 | -0.16661 | 0.619239 | 0.8576 | 0.58311 | sn-Glycerol 3-phosphate                            | 0.4448725  | - | - | - | 84.1234  | 171.0665   |
| NEG05320 | 684694.384  | 571897.5286 | -0.2597  | 0.021305 | 0.3495 | 0.41985 | Monobasic calcium phosphate                        | 2.4044959  | - | - | - | 83.7991  | 233.045786 |
| NEG05321 | 124141.5873 | 122760.0799 | -0.01615 | 0.872707 | 0.9572 | 0.00418 | Succite                                            | -0.3296922 | - | - | - | 83.7925  | 117.080684 |
| NEG05323 | 839860.3346 | 704952.9858 | -0.25262 | 0.299665 | 0.7148 | 0.34728 | 2-Methacryloyloxyethyl phenyl phosphate            | -12.262628 | - | - | - | 83.7709  | 285.206914 |
| NEG05330 | 1789455.024 | 1484206.028 | -0.26983 | 0.53866  | 0.8251 | 0.25026 | Dihydrogen phosphate                               | 2.5076671  | - | - | - | 83.0787  | 95.9801666 |
| NEG05332 | 467358.5898 | 493375.0215 | 0.078155 | 0.548405 | 0.8287 | 0.11783 | (R)-5-Phosphomevalote                              | -4.0258999 | - | - | - | 82.6095  | 227.128805 |
| NEG05337 | 3284856.443 | 1375091.905 | -1.2563  | 0.395298 | 0.7526 | 1.3907  | Disodium malate                                    | -13.163136 | - | - | - | 82.2852  | 177.04148  |
| NEG05338 | 5406550.917 | 4170125.657 | -0.37462 | 0.224558 | 0.6707 | 1.21877 | Tetrafluoroethylene                                | -13.559129 | - | - | - | 82.2381  | 99.0063673 |
| NEG05348 | 699301.2127 | 633324.2283 | -0.14297 | 0.441504 | 0.7752 | 0.21222 | D-xyroxy-L-(hydroxymethyl)-2-(sulfoxy)methylpropan | -8.3868836 | - | - | - | 81.7067  | 229.180793 |
| NEG05349 | 831226.7078 | 738018.5436 | -0.17158 | 0.156301 | 0.6183 | 0.37447 | Haloxydine                                         | 12.064445  | - | - | - | 81.7007  | 198.965436 |
| NEG05356 | 731796.4132 | 576112.7083 | -0.34509 | 0.149651 | 0.6145 | 0.35888 | Arbutin 6-phosphate                                | -9.1053258 | - | - | - | 80.6771  | 351.220616 |
| NEG05358 | 1412773.194 | 1973012.072 | 0.48187  | 0.217583 | 0.6665 | 0.61251 | (L)-4-(L-Hydroxy-D-sulfotophenyl)-2-oxo-3-butanone | 12.928646  | - | - | - | 80.6646  | 271.227543 |
| NEG05366 | 1074438.574 | 1054807.317 | -0.0266  | 0.929361 | 0.9763 | 0.12862 | 3,4-Dihydroxymandelate                             | 0.0477654  | - | - | - | 79.9101  | 183.138832 |
| NEG05369 | 356739.2016 | 355814.8065 | -0.00374 | 0.976758 | 0.9933 | 0.03108 | Bromobenzene                                       | 4.371434   | - | - | - | 79.617   | 156.00131  |
| NEG05374 | 133182.3362 | 108105.0822 | -0.30097 | 0.183902 | 0.6427 | 0.16672 | Reduced coenzyme F420                              | 9.9451539  | - | - | - | 78.41835 | 774.608937 |

|          |             |             |          |          |        |         |                                                            |            |   |   |   |          |            |
|----------|-------------|-------------|----------|----------|--------|---------|------------------------------------------------------------|------------|---|---|---|----------|------------|
| NEG05375 | 408363.5683 | 433482.1312 | 0.086118 | 0.505399 | 0.8056 | 0.11031 | Tricalcium phosphate                                       | 2.6262922  | - | - | - | 78.2228  | 309.170238 |
| NEG05379 | 1762097.21  | 621008.9816 | -1.50461 | 0.023266 | 0.3593 | 1.43183 | sn-Glycero-3-phospho-1-<br>inositol                        | -0.7404892 | - | - | - | 77.7544  | 333.206776 |
| NEG05384 | 1656945.072 | 1417860.755 | -0.22481 | 0.557179 | 0.8301 | 0.36917 | Diethylphosphoric acid                                     | -14.752985 | - | - | - | 77.5293  | 153.09195  |
| NEG05386 | 8551232.383 | 10510847.94 | 0.297675 | 0.569971 | 0.8352 | 0.25441 | Trimethylselenonium                                        | 0.4984485  | - | - | - | 77.1757  | 123.056385 |
| NEG05387 | 4376049.205 | 3199222.588 | -0.45191 | 0.145663 | 0.6127 | 0.99037 | 4-Maleylacetoacetate                                       | -21.93197  | - | - | - | 77.1755  | 199.133834 |
| NEG05388 | 1035833.187 | 1134117.158 | 0.130778 | 0.54118  | 0.8268 | 0.20095 | 3,4-Dihydroxyphthalate                                     | -20.496705 | - | - | - | 77.1755  | 197.118262 |
| NEG05397 | 1134792.694 | 1340082.318 | 0.239893 | 0.202684 | 0.6612 | 0.45796 | Chrysoeriol                                                | 10.369296  | - | - | - | 76.4529  | 299.258737 |
| NEG05398 | 127326.2348 | 118884.896  | -0.09896 | 0.530894 | 0.8204 | 0.06982 | 5'-Deoxy-5-<br>fluorocytidine                              | -3.73114   | - | - | - | 76.2998  | 244.199508 |
| NEG05399 | 862858.935  | 876015.7546 | 0.021832 | 0.859787 | 0.9535 | 0.02933 | Thiadiazolidinone                                          | -13.129232 | - | - | - | 76.1519  | 325.20064  |
| NEG05404 | 1432247.269 | 1197984.741 | -0.25767 | 0.040424 | 0.438  | 0.59448 | 5-Azacytidine                                              | -4.9455308 | - | - | - | 75.8179  | 243.196216 |
| NEG05412 | 308771.3157 | 402674.1211 | 0.383074 | 0.247397 | 0.6846 | 0.25479 | UDP-N-acetyl-D-<br>galactosamine 4,6-<br>bisulfate         | 16.936879  | - | - | - | 75.4472  | 766.485822 |
| NEG05415 | 969252.358  | 827450.9264 | -0.2282  | 0.530672 | 0.8203 | 0.34365 | (1E,3E)-4-oxo-4-oxo-<br>1,3-diene-1,2,4-<br>tricarboxylate | 10.669948  | - | - | - | 75.3982  | 201.11318  |
| NEG05422 | 153733.8033 | 242587.9429 | 0.658073 | 0.024733 | 0.3595 | 0.40808 | N-Acetylglucosamine 4-<br>sulfate                          | -5.5727634 | - | - | - | 75.10925 | 300.262044 |
| NEG05428 | 23981132.25 | 12456435.44 | -0.94501 | 0.296089 | 0.7138 | 3.27961 | (2R,3S)-Piscidic acid                                      | -19.183062 | - | - | - | 74.57315 | 255.196609 |
| NEG05444 | 455501.296  | 347333.5645 | -0.39113 | 0.435956 | 0.7716 | 0.27625 | beta-Citryl-L-glutamate                                    | 1.9606774  | - | - | - | 73.88775 | 320.230853 |
| NEG05452 | 1396435.27  | 153703.0363 | -3.18353 | 0.014113 | 0.3053 | 1.48615 | 3',5'-Cyclic<br>IMP                                        | -23.860977 | - | - | - | 73.68555 | 329.175545 |
| NEG05462 | 156935.2503 | 40384.94996 | -1.95828 | 0.026714 | 0.367  | 0.45051 | AminoDAHP                                                  | -4.4468456 | - | - | - | 73.3743  | 286.152546 |
| NEG05466 | 4131583.91  | 1991891.035 | -1.05256 | 0.157618 | 0.6192 | 1.70477 | Inosine-5'-<br>carboxylate                                 | -18.896546 | - | - | - | 73.369   | 311.222423 |
| NEG05468 | 1345993.196 | 1080931.446 | -0.3164  | 0.082556 | 0.5402 | 0.63101 | Fosetyl                                                    | -8.2089613 | - | - | - | 73.19335 | 109.04072  |
| NEG05471 | 4791791.846 | 4480200.523 | -0.097   | 0.197641 | 0.6557 | 0.66079 | Angelicin                                                  | -8.9660489 | - | - | - | 73.0325  | 185.154554 |
| NEG05478 | 267401.2382 | 376808.8563 | 0.494827 | 0.235748 | 0.6796 | 0.29464 | Formyl-CoA                                                 | -24.999163 | - | - | - | 72.85465 | 794.517035 |
| NEG05481 | 3019015.448 | 2789681.02  | -0.11398 | 0.344468 | 0.7302 | 0.46909 | Selenomethionine Se-<br>oxide                              | -16.955213 | - | - | - | 72.7003  | 211.094827 |
| NEG05493 | 305874.4352 | 506600.2593 | 0.727908 | 0.084418 | 0.5416 | 0.51446 | Oxaloglutarate                                             | 8.8303974  | - | - | - | 72.0606  | 203.128726 |

|          |             |             |          |          |        |         |                                                                             |            |   |   |   |          |            |
|----------|-------------|-------------|----------|----------|--------|---------|-----------------------------------------------------------------------------|------------|---|---|---|----------|------------|
| NEG05495 | 88986.12304 | 62898.76773 | -0.50055 | 0.156207 | 0.6183 | 0.14677 | MC-5127                                                                     | 19.308994  | - | - | - | 71.9966  | 355.1571   |
| NEG05503 | 2171183.394 | 2100320.961 | -0.04787 | 0.786978 | 0.927  | 0.03529 | Diallat                                                                     | 0.8612248  | - | - | - | 71.4788  | 269.212056 |
| NEG05505 | 269064.8364 | 275272.154  | 0.032905 | 0.929644 | 0.9763 | 0.05235 | 2,3,4,7,8,9,12,22,23,28-decahydroxy-14-(hydroxymethyl)                      | -3.8649957 | - | - | - | 71.3077  | 753.507807 |
| NEG05510 | 853038.766  | 563192.1849 | -0.59898 | 0.053206 | 0.483  | 0.62002 | 2,4-Dinitroaniline                                                          | 22.509176  | - | - | - | 70.96635 | 182.118445 |
| NEG05512 | 4675907.65  | 4576357.394 | -0.03105 | 0.638495 | 0.8672 | 0.34366 | Diamidafos                                                                  | 13.22532   | - | - | - | 70.9637  | 199.170171 |
| NEG05515 | 205865.1273 | 191039.5222 | -0.10783 | 0.517957 | 0.8123 | 0.10914 | Luteolin 7-O- $\beta$ -D-glucuronosyl-(1-&gt;2)- $\beta$ -D-glucopyranoside | -17.245534 | - | - | - | 70.6266  | 637.466212 |
| NEG05517 | 2723064.05  | 690034.2238 | -1.98049 | 0.32233  | 0.7192 | 1.20582 | Wedelolactone                                                               | -2.9706891 | - | - | - | 70.2661  | 313.23819  |
| NEG05520 | 282011.1598 | 225126.7412 | -0.32501 | 0.355008 | 0.7334 | 0.19837 | 5-Tetrazolyl-glycine                                                        | -10.539308 | - | - | - | 70.25365 | 142.095315 |
| NEG05522 | 1991382.568 | 1833248.665 | -0.11937 | 0.177946 | 0.6369 | 0.43633 | 5-nytroxy-2-methyl-2-[(sulfooxy)methyl]propanoic acid                       | 14.74565   | - | - | - | 69.92945 | 213.185882 |
| NEG05530 | 4189238.998 | 3899280.99  | -0.10348 | 0.292484 | 0.7095 | 0.54496 | Pemirolast                                                                  | -6.298332  | - | - | - | 69.4314  | 227.201386 |
| NEG05536 | 1984754.725 | 2340452.406 | 0.237827 | 0.110519 | 0.5692 | 0.56812 | Arbutin 6-phosphate                                                         | -8.9058242 | - | - | - | 69.2213  | 351.220686 |
| NEG05542 | 82669.1838  | 105381.5639 | 0.350201 | 0.199111 | 0.6569 | 0.16848 | Tannin                                                                      | 2.5268129  | - | - | - | 68.7263  | 619.420491 |
| NEG05543 | 1320041.932 | 1346699.268 | 0.028844 | 0.841405 | 0.9478 | 0.06827 | 3-Phosphonooxypyruvate                                                      | -23.646341 | - | - | - | 68.71335 | 183.029771 |
| NEG05545 | 10374054.21 | 11896367.78 | 0.197541 | 0.095136 | 0.5568 | 1.37187 | N-Benzoyl-4-hydroxyanthranilate                                             | 7.5779606  | - | - | - | 68.5524  | 256.236073 |
| NEG05547 | 491852.6628 | 413092.7172 | -0.25176 | 0.321141 | 0.7192 | 0.23766 | Leipinium 3-O-3',6'-di-O-acetyl                                             | -21.372653 | - | - | - | 68.5411  | 636.455699 |
| NEG05551 | 870052.8491 | 826838.4994 | -0.0735  | 0.764178 | 0.9204 | 0.07523 | Corilagin                                                                   | -13.959016 | - | - | - | 68.3648  | 633.436667 |
| NEG05553 | 1254031.477 | 1042685.605 | -0.26627 | 0.269295 | 0.6959 | 0.41021 | 1-O,2-O,6-O-Trigalloyl-beta-D-glucose                                       | -14.076688 | - | - | - | 68.1925  | 635.452464 |
| NEG05575 | 1020318.322 | 570548.6999 | -0.8386  | 0.014991 | 0.3098 | 0.90393 | 1-Deoxy-D-altro-heptulose 7-phosphate                                       | -21.220047 | - | - | - | 64.052   | 273.149306 |
| NEG05588 | 655957.9584 | 1154942.248 | 0.816145 | 0.179907 | 0.6395 | 0.56909 | 2-Oxo-3-hydroxy-4-phosphobutanoate                                          | -20.568218 | - | - | - | 62.9286  | 213.05562  |
| NEG05599 | 236079.5343 | 189054.6415 | -0.32047 | 0.617139 | 0.8569 | 0.21891 | Disodium malate                                                             | -19.372854 | - | - | - | 61.9905  | 177.040374 |
| NEG05610 | 107323.2366 | 97158.18208 | -0.14356 | 0.334448 | 0.7265 | 0.10177 | (R)-5-Diphosphomevalote                                                     | 12.530011  | - | - | - | 61.44935 | 307.113484 |
| NEG05635 | 421945.7407 | 447234.9366 | 0.083975 | 0.652657 | 0.874  | 0.06829 | Tolcapone                                                                   | -10.11358  | - | - | - | 60.2334  | 272.23076  |
| NEG05651 | 733421.9058 | 744465.1516 | 0.021561 | 0.942256 | 0.9805 | 0.04686 | Schradan                                                                    | 6.4316541  | - | - | - | 59.6065  | 285.243264 |

|          |             |             |          |          |        |         |                                                                             |            |   |   |   |          |            |
|----------|-------------|-------------|----------|----------|--------|---------|-----------------------------------------------------------------------------|------------|---|---|---|----------|------------|
| NEG05657 | 2629740.388 | 3107426.988 | 0.2408   | 0.152266 | 0.6145 | 0.65546 | (L)-4-(2-Hydroxy-3-sulfotophenyl)-2-oxo-3-butanone                          | 13.03817   | - | - | - | 59.512   | 271.227573 |
| NEG05664 | 827978.8411 | 999232.9009 | 0.271227 | 0.302168 | 0.7148 | 0.36851 | L-Histidinol phosphate                                                      | 11.940966  | - | - | - | 59.2509  | 220.146264 |
| NEG05665 | 440953.5138 | 493351.1684 | 0.161988 | 0.574242 | 0.8374 | 0.14603 | Selfotel                                                                    | 6.3802403  | - | - | - | 59.2165  | 222.157647 |
| NEG05677 | 6258924.277 | 7242966.259 | 0.210666 | 0.421954 | 0.7663 | 0.78073 | Aminoimidazole ribotide                                                     | -1.3671935 | - | - | - | 58.9414  | 294.17872  |
| NEG05681 | 36937913.68 | 40623156.34 | 0.1372   | 0.589707 | 0.8425 | 1.30726 | Potassium dichromate                                                        | -5.8740068 | - | - | - | 58.8773  | 293.175595 |
| NEG05682 | 4106078.885 | 4124890.863 | 0.006595 | 0.966453 | 0.9899 | 0.18015 | Tetrafluoroethylene                                                         | -13.549971 | - | - | - | 58.7742  | 99.0063682 |
| NEG05687 | 581168.0858 | 689180.1409 | 0.245926 | 0.369565 | 0.7408 | 0.27144 | (K)-4-oxo-5-phosphonatopantothenate(2-)                                     | -14.401497 | - | - | - | 58.61765 | 295.181458 |
| NEG05703 | 443072.0029 | 977137.5647 | 1.141021 | 0.067894 | 0.5177 | 0.87164 | Sevoflurane                                                                 | 18.661069  | - | - | - | 58.3007  | 199.051257 |
| NEG05709 | 18517464.29 | 19296815.43 | 0.059476 | 0.694034 | 0.894  | 0.37035 | Glyoxylate                                                                  | 16.562075  | - | - | - | 58.1994  | 73.0294496 |
| NEG05713 | 582190.6758 | 669903.3033 | 0.202461 | 0.272014 | 0.6974 | 0.19537 | Bromobenzene                                                                | 5.0178819  | - | - | - | 58.12525 | 156.001411 |
| NEG05717 | 365513.1688 | 328693.4027 | -0.15318 | 0.428119 | 0.7691 | 0.17886 | Potassium bromate                                                           | 20.282268  | - | - | - | 58.0373  | 165.996611 |
| NEG05721 | 2934937.917 | 2628303.006 | -0.1592  | 0.393909 | 0.7523 | 0.51483 | Dihydrogen phosphate                                                        | 2.4104652  | - | - | - | 57.9206  | 95.9801572 |
| NEG05733 | 3295176.651 | 4404047.349 | 0.418474 | 0.38343  | 0.7477 | 0.8005  | Diatretin 2                                                                 | 23.037861  | - | - | - | 57.6527  | 144.110967 |
| NEG05736 | 278649.6762 | 1854.675118 | -7.23114 | 0.019424 | 0.3424 | 0.68396 | Ethiprole                                                                   | -21.999952 | - | - | - | 57.60075 | 396.186985 |
| NEG05744 | 1314105.215 | 42729.18584 | -4.94272 | 0.012847 | 0.2932 | 1.49101 | Furcozole-cis                                                               | -3.4077477 | - | - | - | 57.43025 | 395.183173 |
| NEG05757 | 587785.5705 | 537756.9923 | -0.12834 | 0.691361 | 0.8929 | 0.15991 | 5-oxo-5-(5-aminimidazole-2-yl)-4-carboxy-5-phosphoribosyl-N-formylglycimide | -12.465629 | - | - | - | 57.1576  | 335.162533 |
| NEG05758 | 21813999.43 | 697326.6584 | -4.96728 | 0.014697 | 0.3087 | 6.03373 | Barbiturate                                                                 | 4.7266256  | - | - | - | 57.0151  | 313.180708 |
| NEG05762 | 1488196.352 | 1459628.44  | -0.02796 | 0.884984 | 0.9609 | 0.17099 | Dichlorophenylcarbamoyl                                                     | -19.699228 | - | - | - | 56.9273  | 127.0764   |
| NEG05764 | 754144.1961 | 312073.9044 | -1.27295 | 0.026687 | 0.367  | 0.89062 | (1S,2S)-1,2-dichlorophenylcarbamoyl                                         | -5.6160767 | - | - | - | 56.924   | 301.144226 |
| NEG05776 | 721065.7641 | 6095903.834 | 3.079637 | 0.153169 | 0.6159 | 2.22479 | Benzoyl meso-tartaric acid                                                  | -20.342115 | - | - | - | 56.59415 | 253.180453 |
| NEG05778 | 187260.2135 | 175758.931  | -0.09145 | 0.31522  | 0.7189 | 0.10578 | Genistein 4-O-diglucuronide                                                 | -7.6793184 | - | - | - | 56.5907  | 621.473043 |
| NEG05786 | 1164561.103 | 1042406.786 | -0.15987 | 0.492637 | 0.8005 | 0.21614 | 5-Hydroxyisourate                                                           | 1.8339778  | - | - | - | 56.5123  | 183.102761 |
| NEG05797 | 141029.1285 | 126993.1588 | -0.15124 | 0.261147 | 0.6904 | 0.12292 | 3-demethyletoposide                                                         | -23.626125 | - | - | - | 56.3099  | 573.509149 |

|          |             |             |          |          |        |         |                                                                                                                      |            |   |   |   |          |            |
|----------|-------------|-------------|----------|----------|--------|---------|----------------------------------------------------------------------------------------------------------------------|------------|---|---|---|----------|------------|
| NEG05801 | 268699.3311 | 441216.2991 | 0.715493 | 0.453539 | 0.7814 | 0.20808 | [5-(Aminomethyl)furan-3-yl]methyl phosphate                                                                          | 10.883122  | - | - | - | 56.25735 | 206.116078 |
| NEG05804 | 2456465.143 | 2602053.812 | 0.083067 | 0.676423 | 0.8854 | 0.30991 | Chrysoeriol                                                                                                          | 10.27855   | - | - | - | 56.2363  | 299.25871  |
| NEG05805 | 23023.64562 | 23631.71441 | 0.037608 | 0.918809 | 0.9735 | 0.00312 | Cartormin                                                                                                            | 3.6762273  | - | - | - | 56.2265  | 574.512939 |
| NEG05807 | 7750884.525 | 7415242.046 | -0.06387 | 0.430015 | 0.7698 | 0.60824 | 2,5-Dioxopentanoate                                                                                                  | 5.1029798  | - | - | - | 56.2136  | 129.092087 |
| NEG05810 | 209066.8034 | 159897.755  | -0.38681 | 0.22396  | 0.6705 | 0.21201 | Azacozole                                                                                                            | -14.307884 | - | - | - | 56.188   | 299.129029 |
| NEG05816 | 136301.5576 | 127852.9326 | -0.09232 | 0.518381 | 0.8129 | 0.0589  | 3,4,5-trinydroxy-6-((1S)-hydroxy-11,17,18-trimethyl-8,9-dihydropteridin-2-yl)methyl]-4-(beta-D-ribofuranosyl)asiline | 21.006681  | - | - | - | 56.15615 | 575.467833 |
| NEG05817 | 60037.10469 | 66676.27103 | 0.151319 | 0.615527 | 0.8564 | 0.04176 | Wedelolactone                                                                                                        | -19.110284 | - | - | - | 56.15325 | 481.367905 |
| NEG05827 | 6769737.559 | 519500.6689 | -3.7039  | 0.337985 | 0.7277 | 2.08946 | S-(1,2-Dichlorovinyl)-L-cysteine                                                                                     | -3.0770773 | - | - | - | 55.98115 | 313.238156 |
| NEG05829 | 910719.3441 | 1063658.057 | 0.223956 | 0.542104 | 0.8268 | 0.10379 | L-Ascorbate 6-phosphate                                                                                              | 17.955529  | - | - | - | 55.9439  | 215.082203 |
| NEG05830 | 195915.048  | 152074.7109 | -0.36545 | 0.365854 | 0.7399 | 0.2221  | S-methyl-5-thio-D-ribose 1-phosphate(2-)                                                                             | 14.917696  | - | - | - | 55.9431  | 255.100544 |
| NEG05831 | 166620.7326 | 155385.8919 | -0.10071 | 0.445466 | 0.7776 | 0.04836 | 4-Maleylacetoacetate                                                                                                 | 11.337938  | - | - | - | 55.93815 | 257.175651 |
| NEG05833 | 2102277.082 | 1809928.024 | -0.21602 | 0.321299 | 0.7192 | 0.5013  | 5-fluorocyclohexadiene-cis,cis-1,2-diol-1-carboxylate                                                                | -21.886118 | - | - | - | 55.9187  | 199.133843 |
| NEG05837 | 715653.22   | 740230.0714 | 0.048713 | 0.84887  | 0.9515 | 0.04425 | Cibarian                                                                                                             | -6.4026262 | - | - | - | 55.8908  | 173.118109 |
| NEG05845 | 91436.44727 | 97746.31715 | 0.096273 | 0.722716 | 0.9063 | 0.05171 | 3,4,5-trinydroxy-6-((2S)-hydroxyacetyl)oxy]oxane-2-carboxylic acid                                                   | -22.158848 | - | - | - | 55.8369  | 381.261753 |
| NEG05848 | 1024194.563 | 601634.48   | -0.76753 | 0.073222 | 0.5226 | 0.82364 | O-Phosphorylhydroxylamine                                                                                            | -11.020602 | - | - | - | 55.7112  | 251.164944 |
| NEG05849 | 792481.0965 | 898670.5791 | 0.181416 | 0.349654 | 0.7323 | 0.34164 | 5-(methylsulfanyl)-2,3-dioxopentyl Phosphate(2-)                                                                     | 12.900128  | - | - | - | 55.7107  | 112.003981 |
| NEG05852 | 642883.0578 | 1068183.696 | 0.732532 | 0.421207 | 0.7661 | 0.35177 | Inosine-5'-carboxylate                                                                                               | 8.5059311  | - | - | - | 55.692   | 239.164766 |
| NEG05856 | 657110.6471 | 641474.2789 | -0.03474 | 0.840719 | 0.9478 | 0.02157 | Ibandronate                                                                                                          | -19.212054 | - | - | - | 55.5931  | 311.222325 |
| NEG05868 | 902197.94   | 418433.7349 | -1.10844 | 0.065187 | 0.5103 | 0.78169 | Pydanon                                                                                                              | -20.567088 | - | - | - | 55.3753  | 318.215058 |
| NEG05870 | 856040.8127 | 803319.2755 | -0.09171 | 0.746468 | 0.914  | 0.21338 | 2-(alpha-D-Mannosyl)-3-phosphoglycerate 5-hydroxy-L-(hydroxymethyl)-2-                                               | 16.450885  | - | - | - | 55.3638  | 187.133918 |
| NEG05875 | 384148.0294 | 187752.6666 | -1.03283 | 0.021016 | 0.3489 | 0.59608 | 5,4,5-trinydroxy-6-((1R)-methoxy-13-oxo-6,8,20-trioxapentacycl[10.8.0.0i                                             | -13.352451 | - | - | - | 55.3154  | 347.185874 |
| NEG05878 | 205263.482  | 209675.437  | 0.030681 | 0.857397 | 0.9533 | 0.01418 |                                                                                                                      | -8.2880271 | - | - | - | 55.2774  | 229.180816 |
| NEG05879 | 91172.97588 | 91633.36296 | 0.007267 | 0.979131 | 0.9946 | 0.00734 |                                                                                                                      | -10.201384 | - | - | - | 55.2774  | 499.399619 |

|          |             |             |          |          |        |         |                                                                         |            |   |   |   |          |            |
|----------|-------------|-------------|----------|----------|--------|---------|-------------------------------------------------------------------------|------------|---|---|---|----------|------------|
| NEG05880 | 1190800.137 | 1043370.633 | -0.19068 | 0.203719 | 0.6615 | 0.4283  | 2,3-Diketo-D-methylthiopentyl-1-phosphate                               | 4.8968268  | - | - | - | 55.27    | 241.180609 |
| NEG05882 | 247535.8499 | 124417.6984 | -0.99245 | 0.006212 | 0.2196 | 0.48611 | Cycloguanil hydrochloride                                               | -14.115774 | - | - | - | 55.2594  | 287.164956 |
| NEG05884 | 511276.5514 | 449668.1722 | -0.18524 | 0.42787  | 0.7691 | 0.21031 | 5-Azacytidine                                                           | -5.2926863 | - | - | - | 55.2562  | 243.196131 |
| NEG05887 | 9708038.58  | 12528024.1  | 0.367907 | 0.715447 | 0.9033 | 1.29304 | sn-Glycerol 3-phosphate                                                 | -0.0631609 | - | - | - | 55.2302  | 171.066413 |
| NEG05888 | 1992106.473 | 2921031.508 | 0.552183 | 0.455108 | 0.7817 | 0.84707 | Fenpiclonil                                                             | 3.7762152  | - | - | - | 55.2208  | 236.078319 |
| NEG05891 | 966249.5153 | 1164606.333 | 0.269375 | 0.343762 | 0.7301 | 0.25487 | Diethylphosphoric acid                                                  | -15.065509 | - | - | - | 55.1857  | 153.091902 |
| NEG05893 | 190138.4651 | 207355.5554 | 0.125056 | 0.760812 | 0.919  | 0.08423 | 2-((nyuroxy(0-nyuroxy-1-methoxy-2H-1,3-benzodioxol-5                    | -8.6442519 | - | - | - | 55.17765 | 268.199396 |
| NEG05894 | 1588822.321 | 1545184.204 | -0.04018 | 0.882901 | 0.9601 | 0.03953 | DHAP(6:0)                                                               | 10.536186  | - | - | - | 55.1742  | 267.196349 |
| NEG05895 | 317284.494  | 387600.2283 | 0.288792 | 0.125476 | 0.5916 | 0.24285 | Urate-3-ribonucleoside                                                  | 15.659691  | - | - | - | 55.1733  | 299.222325 |
| NEG05897 | 228127.0388 | 296471.9349 | 0.378058 | 0.518763 | 0.8132 | 0.20707 | Compound WIN VIII                                                       | 23.462245  | - | - | - | 55.135   | 472.350729 |
| NEG05909 | 1003369.269 | 782108.3611 | -0.35941 | 0.498392 | 0.8016 | 0.34721 | sn-Glycero-3-phospho-1-inositol                                         | -0.9189013 | - | - | - | 54.9517  | 333.206716 |
| NEG05911 | 489978.8377 | 410033.0878 | -0.25698 | 0.199299 | 0.6569 | 0.29439 | Stipitate                                                               | 2.6219422  | - | - | - | 54.9374  | 181.123401 |
| NEG05915 | 788864.8768 | 716606.7648 | -0.1386  | 0.579478 | 0.8394 | 0.23291 | Phenolic phosphate                                                      | -11.618488 | - | - | - | 54.9288  | 173.081801 |
| NEG05918 | 183121.3252 | 156476.7476 | -0.22685 | 0.442195 | 0.7757 | 0.06837 | Glucovanillin                                                           | -19.639097 | - | - | - | 54.9246  | 313.274451 |
| NEG05922 | 22954.23994 | 30113.35428 | 0.391643 | 0.274168 | 0.6994 | 0.09107 | (2S,3R)-2-[(1R)-1-[3,5-bis(trifluoromethyl)phenyl]ethoxy]propanoic acid | 9.7515849  | - | - | - | 54.9142  | 436.348188 |
| NEG05925 | 726684.6435 | 657890.372  | -0.14348 | 0.248008 | 0.6846 | 0.26119 | Anthragallol                                                            | -24.914384 | - | - | - | 54.8789  | 255.19664  |
| NEG05927 | 2784702.289 | 3250052.2   | 0.22294  | 0.69315  | 0.8938 | 0.40883 | L-Selenocysteine                                                        | 0.5392667  | - | - | - | 54.8721  | 167.046014 |
| NEG05937 | 1268768.825 | 1101367.037 | -0.20413 | 0.14866  | 0.6145 | 0.48985 | L-Selenomethionine                                                      | 18.392738  | - | - | - | 54.5981  | 195.10263  |
| NEG05940 | 4939127.273 | 5408159.563 | 0.130882 | 0.355516 | 0.7339 | 0.6305  | Bowdichione                                                             | 11.404844  | - | - | - | 54.5256  | 297.243125 |
| NEG05943 | 442409.1752 | 373572.4079 | -0.24399 | 0.332684 | 0.7243 | 0.2106  | norsertaline                                                            | 0.8691088  | - | - | - | 54.514   | 291.195977 |
| NEG05947 | 41038.63706 | 72572.30556 | 0.822436 | 0.055858 | 0.4884 | 0.22509 | 11-O-Demethylpradinone I                                                | 12.746886  | - | - | - | 54.4423  | 463.376443 |
| NEG05950 | 201567.8188 | 218190.9251 | 0.114326 | 0.586238 | 0.8419 | 0.09027 | Isochamaejasmin                                                         | 1.2479812  | - | - | - | 54.3838  | 541.4831   |
| NEG05957 | 208098.8379 | 148021.9184 | -0.49146 | 0.408782 | 0.7599 | 0.24595 | Juglone                                                                 | 1.7008404  | - | - | - | 54.2743  | 173.14582  |

|          |             |             |          |          |        |         |                                                                            |            |   |   |   |          |            |
|----------|-------------|-------------|----------|----------|--------|---------|----------------------------------------------------------------------------|------------|---|---|---|----------|------------|
| NEG05961 | 349230.4367 | 366630.723  | 0.070148 | 0.875458 | 0.9578 | 0.04805 | Keaucea 2,6-Dichlorophenolindopheno                                        | -4.5792607 | - | - | - | 54.2568  | 269.102886 |
| NEG05963 | 1496464.014 | 1239313.338 | -0.27202 | 0.026764 | 0.367  | 0.66119 | 3,4-Dihydroxymandelate                                                     | -0.0304505 | - | - | - | 54.22265 | 183.138818 |
| NEG05964 | 42274.52112 | 55837.71649 | 0.401452 | 0.200037 | 0.658  | 0.1166  | Phosphoramidon                                                             | -19.095806 | - | - | - | 54.21525 | 542.486245 |
| NEG05965 | 2819212.529 | 2393895.408 | -0.23593 | 0.105509 | 0.5677 | 0.75398 | Tris(1-aziridinyl)phosphine oxide                                          | -18.161083 | - | - | - | 54.21205 | 172.142279 |
| NEG05967 | 176837.9103 | 141085.6076 | -0.32586 | 0.400195 | 0.7562 | 0.15625 | Nicergoline                                                                | 10.660399  | - | - | - | 54.18985 | 483.383887 |
| NEG05971 | 1149383.007 | 1208367.278 | 0.072199 | 0.671878 | 0.883  | 0.10772 | Chloroneb                                                                  | -4.0886203 | - | - | - | 54.15375 | 206.045777 |
| NEG05973 | 341099.3264 | 248567.1117 | -0.45656 | 0.015036 | 0.3098 | 0.3869  | Niflumic acid                                                              | 4.7893152  | - | - | - | 54.1201  | 281.212075 |
| NEG05977 | 3980256.918 | 4495450.842 | 0.175604 | 0.339316 | 0.7277 | 0.50278 | Diallat                                                                    | 0.6184116  | - | - | - | 54.0516  | 269.211991 |
| NEG05984 | 1141025.649 | 1043992.021 | -0.12822 | 0.6336   | 0.8648 | 0.11845 | Tricrozarin A                                                              | 18.828316  | - | - | - | 53.8224  | 293.211963 |
| NEG05988 | 1159682.481 | 1044071.884 | -0.15151 | 0.221005 | 0.6692 | 0.3179  | Meconic acid                                                               | 11.165608  | - | - | - | 53.7113  | 199.097458 |
| NEG05989 | 2349797.205 | 2578338.868 | 0.133906 | 0.558044 | 0.8305 | 0.3545  | Glycerone phosphate                                                        | 0.4884455  | - | - | - | 53.6861  | 169.050606 |
| NEG05992 | 175242.6613 | 188918.8931 | 0.108413 | 0.570063 | 0.8352 | 0.07901 | Hexaflurate                                                                | 6.443226   | - | - | - | 53.57785 | 227.004493 |
| NEG05993 | 473006.2267 | 401890.662  | -0.23506 | 0.66779  | 0.8807 | 0.19609 | 2,4-DB                                                                     | -12.54089  | - | - | - | 53.5774  | 248.0802   |
| NEG05994 | 82120.29663 | 79654.49115 | -0.04398 | 0.849979 | 0.9515 | 0.01228 | 7-Dehydrologanin tetraacetate                                              | -13.133444 | - | - | - | 53.57475 | 555.498614 |
| NEG05999 | 3594446.503 | 3186006.875 | -0.17402 | 0.383651 | 0.7477 | 0.61501 | (1S,2R)-2-(2,2-Dichloroethenyl)-2,2-dimethyl-1,3-dioxane-3-carboxylic acid | -5.3898544 | - | - | - | 53.5078  | 208.061397 |
| NEG06009 | 1447744.023 | 124045.0011 | -3.54487 | 0.018205 | 0.3332 | 1.47046 | 3'-Cyclic IMP                                                              | -23.970384 | - | - | - | 53.28005 | 329.175509 |
| NEG06016 | 2850161.766 | 2541173.1   | -0.16555 | 0.476921 | 0.7932 | 0.16647 | Phaseolic acid                                                             | 16.220883  | - | - | - | 53.2108  | 295.227129 |
| NEG06019 | 1486386.76  | 1956656.904 | 0.396581 | 0.245283 | 0.6839 | 0.62141 | Tricalcium phosphate                                                       | 2.8514621  | - | - | - | 53.17375 | 309.170308 |
| NEG06022 | 281091.6486 | 675042.8542 | 1.263939 | 0.321984 | 0.7192 | 0.63079 | Nitrofen                                                                   | -19.878714 | - | - | - | 53.0811  | 283.081976 |
| NEG06023 | 94425.93    | 88861.34105 | -0.08763 | 0.856964 | 0.9533 | 0.00607 | Mangiferin                                                                 | -6.3386328 | - | - | - | 53.04385 | 421.329646 |
| NEG06031 | 9458616.874 | 7619404.963 | -0.31195 | 0.001154 | 0.0993 | 1.82724 | Angelicin                                                                  | -9.0999696 | - | - | - | 52.81095 | 185.154529 |
| NEG06032 | 124064.3583 | 80035.58941 | -0.63238 | 0.036838 | 0.4235 | 0.26383 | 3-(Uracil-1-yl)-L-alanine                                                  | 5.2165146  | - | - | - | 52.7707  | 198.157862 |
| NEG06036 | 355754.7694 | 228925.8148 | -0.636   | 0.007767 | 0.2439 | 0.44671 | TEPP                                                                       | -0.1241581 | - | - | - | 52.71645 | 289.180387 |



|          |             |             |          |          |        |         |                                                                                                            |            |   |   |   |          |            |
|----------|-------------|-------------|----------|----------|--------|---------|------------------------------------------------------------------------------------------------------------|------------|---|---|---|----------|------------|
| NEG06040 | 132146.2491 | 131314.6422 | -0.00911 | 0.974269 | 0.9925 | 0.00586 | Pteroyltriglutamic acid                                                                                    | 16.281502  | - | - | - | 52.45115 | 698.629514 |
| NEG06043 | 136231.0646 | 92698.9673  | -0.55543 | 0.050713 | 0.4758 | 0.22445 | Melarsoprol                                                                                                | 0.7055479  | - | - | - | 52.4022  | 397.331704 |
| NEG06044 | 413151.7105 | 741473.4595 | 0.843723 | 0.359912 | 0.7364 | 0.56141 | $\alpha$ -Protocatechoylphloroglucinalcarboxylate                                                          | -18.01687  | - | - | - | 52.3984  | 305.211606 |
| NEG06050 | 124612.7414 | 104979.1114 | -0.24735 | 0.458154 | 0.7822 | 0.12505 | (-)-Epiarfaelechin 3-gallate                                                                               | -5.5790354 | - | - | - | 52.1739  | 425.363245 |
| NEG06051 | 207912.8799 | 165660.0168 | -0.32775 | 0.207587 | 0.6619 | 0.19985 | Diclosulam                                                                                                 | 23.945835  | - | - | - | 52.1527  | 405.222051 |
| NEG06053 | 3048578.994 | 6792561.744 | 1.155819 | 0.162937 | 0.6247 | 2.0828  | 2-Phosphoglycolate                                                                                         | -19.656968 | - | - | - | 52.13435 | 155.020956 |
| NEG06059 | 166706.143  | 134794.2945 | -0.30655 | 0.047466 | 0.4627 | 0.19356 | Thiadiazolidinethione                                                                                      | -3.6296324 | - | - | - | 51.9166  | 341.269281 |
| NEG06060 | 590053.5885 | 531211.6435 | -0.15156 | 0.383155 | 0.7477 | 0.14052 | Tetracenomycin M                                                                                           | 7.2389391  | - | - | - | 51.91475 | 355.321403 |
| NEG06064 | 3838146.142 | 93614.39791 | -5.35754 | 0.333684 | 0.7254 | 1.43199 | 3-Deoxy-D-manno-octulosate                                                                                 | 4.0660397  | - | - | - | 51.8228  | 237.185692 |
| NEG06067 | 247986.9527 | 195505.0891 | -0.34306 | 0.016269 | 0.3186 | 0.29578 | Nifuradene                                                                                                 | 16.644909  | - | - | - | 51.6319  | 223.169955 |
| NEG06069 | 18494847.18 | 16789106.3  | -0.1396  | 0.653815 | 0.8741 | 0.27532 | Diamidafos                                                                                                 | 13.333673  | - | - | - | 51.57955 | 199.170192 |
| NEG06071 | 1724088.818 | 1843659.847 | 0.096738 | 0.756052 | 0.9174 | 0.08898 | $\alpha$ -[2-(2-oxobut-2-enyl)amino]-L-alanine                                                             | 4.2850969  | - | - | - | 51.571   | 200.173485 |
| NEG06074 | 207602.5296 | 194256.5697 | -0.09586 | 0.686748 | 0.89   | 0.04925 | Cidofovir                                                                                                  | 13.686886  | - | - | - | 51.4853  | 278.183545 |
| NEG06076 | 29494.62028 | 34189.33078 | 0.213094 | 0.388818 | 0.7506 | 0.05482 | 1,3,5,8-tetrahydroxy-6-methoxy-2-methylthymopyran-8-O                                                      | -7.1579662 | - | - | - | 51.4668  | 477.392199 |
| NEG06077 | 244031.2684 | 144542.9324 | -0.75557 | 0.074535 | 0.5247 | 0.33636 | CGH 2466                                                                                                   | 0.7197233  | - | - | - | 51.4622  | 321.205355 |
| NEG06078 | 232185.9728 | 190256.6557 | -0.28733 | 0.146764 | 0.6136 | 0.20069 | (R)-4-oxo-5-phosphonopantothenate(2-)                                                                      | 11.170682  | - | - | - | 51.4605  | 295.189032 |
| NEG06080 | 531434.8836 | 874688.9697 | 0.718877 | 0.42842  | 0.7691 | 0.53571 | Vicianose                                                                                                  | -14.852227 | - | - | - | 51.311   | 311.258585 |
| NEG06081 | 515144.485  | 541469.3045 | 0.071902 | 0.683906 | 0.8892 | 0.09224 | Triphenyl phosphate                                                                                        | -4.0119811 | - | - | - | 51.28825 | 325.274514 |
| NEG06082 | 282329.6581 | 254169.0066 | -0.15159 | 0.547982 | 0.8287 | 0.1484  | Styraxin                                                                                                   | -23.142383 | - | - | - | 51.25605 | 369.336853 |
| NEG06084 | 326635.985  | 451192.3382 | 0.466059 | 0.007309 | 0.24   | 0.47913 | beta-Citryl-L-glutamate                                                                                    | 0.4375818  | - | - | - | 51.23865 | 320.230364 |
| NEG06087 | 339101.7439 | 305835.412  | -0.14896 | 0.314681 | 0.7189 | 0.1581  | Chlorogete                                                                                                 | 11.702964  | - | - | - | 51.1869  | 353.30557  |
| NEG06090 | 426319.9879 | 608284.6987 | 0.51281  | 0.586969 | 0.8421 | 0.19833 | {[4-(1-methoxy-2-oxo-2H-chromen-6-yl)-2-oxobut-3-enyl]aziridin-4-yl}tetra-O-galloyl-beta-D-glucopyranoside | -8.6048251 | - | - | - | 51.0871  | 339.289795 |
| NEG06095 | 95094.05618 | 75527.93233 | -0.33234 | 0.040261 | 0.438  | 0.15985 | galloyl-beta-D-glucopyranoside                                                                             | -24.570079 | - | - | - | 50.9165  | 801.572503 |

|          |             |             |          |          |        |         |                                                                                                                                                                           |            |   |   |   |          |            |
|----------|-------------|-------------|----------|----------|--------|---------|---------------------------------------------------------------------------------------------------------------------------------------------------------------------------|------------|---|---|---|----------|------------|
| NEG06096 | 597450.5918 | 553568.4975 | -0.11006 | 0.484639 | 0.7985 | 0.12838 | 4-(metylnitrosamino)-1-(3-pyridyl)-1-butanol<br>chalconida                                                                                                                | -15.630674 | - | - | - | 50.91255 | 384.3558   |
| NEG06101 | 234401.3977 | 173259.8822 | -0.43604 | 0.05851  | 0.4925 | 0.27653 | Decarbamoylgonyautoxin<br>1                                                                                                                                               | 12.66865   | - | - | - | 50.8748  | 367.32109  |
| NEG06102 | 3091547.521 | 2327421.182 | -0.4096  | 0.087138 | 0.5472 | 0.9612  | 1-(2-methoxy-4-(3,5,7-trihydroxy-3,4-dihydro-2H-1-benzoxan-2-ylideneamino)-2-oxo-1,2,3,4-tetrahydropyridin-5-ylideneamino)-2-oxo-1,2,3,4-tetrahydropyridin-5-ylideneamino | -0.4589116 | - | - | - | 50.80705 | 383.352547 |
| NEG06104 | 674683.363  | 497722.6368 | -0.43887 | 0.05626  | 0.4892 | 0.45354 | Pyridoxamine phosphate                                                                                                                                                    | 17.795963  | - | - | - | 50.7785  | 247.17014  |
| NEG06107 | 263482.0012 | 271805.6332 | 0.044871 | 0.813762 | 0.9353 | 0.02552 | 1,2,3,6-Tetrakis-O-galloyl-beta-D-glucose                                                                                                                                 | -11.560392 | - | - | - | 50.7346  | 787.556507 |
| NEG06108 | 49288.51064 | 76549.20949 | 0.635136 | 0.194411 | 0.6521 | 0.15082 | FADH2                                                                                                                                                                     | -17.634127 | - | - | - | 50.71235 | 786.544435 |
| NEG06109 | 5311670.658 | 4314993.658 | -0.29981 | 0.01412  | 0.3053 | 1.23364 | 5-hydroxy-2-methyl-2-[(sulfoxy)methyl]propanoic acid                                                                                                                      | 14.508503  | - | - | - | 50.6756  | 213.185831 |
| NEG06110 | 231951.9763 | 253321.8527 | 0.127145 | 0.680442 | 0.8871 | 0.03858 | Carboxy-3-hydroxy-3-methylbutanoic hyacin                                                                                                                                 | -16.311663 | - | - | - | 50.6756  | 607.484398 |
| NEG06111 | 160924.4067 | 237673.5357 | 0.562598 | 0.20829  | 0.6619 | 0.25718 | Tellimagrandin I                                                                                                                                                          | -10.977348 | - | - | - | 50.6756  | 785.541089 |
| NEG06116 | 3166431.075 | 2899110.172 | -0.12725 | 0.280511 | 0.7005 | 0.55347 | 6-(10-(3,4-dihydroxy-6-methyl-5-oxooxan-2-yl)-2-(2,4-dihydroxyphenyl)-5-hesperetin 3'-O-sulfate                                                                           | -5.931803  | - | - | - | 50.6254  | 605.478126 |
| NEG06118 | 472775.7455 | 468665.1544 | -0.0126  | 0.938201 | 0.9792 | 0.0009  | hesperetin 3'-O-sulfate                                                                                                                                                   | 5.2850797  | - | - | - | 50.5885  | 381.336744 |
| NEG06119 | 936344.5595 | 811076.2577 | -0.2072  | 0.173789 | 0.6333 | 0.40195 | alpha-1,5-L-Arabinotetraose                                                                                                                                               | -18.019558 | - | - | - | 50.5864  | 545.456676 |
| NEG06123 | 64732.83828 | 44820.84083 | -0.53033 | 0.324707 | 0.7202 | 0.16665 | (-)-Epigallocatechin 3,3'-di-gallate                                                                                                                                      | -21.78867  | - | - | - | 50.5788  | 609.455422 |
| NEG06124 | 211073.8342 | 185364.8668 | -0.18738 | 0.263545 | 0.6922 | 0.17584 | Epicatechin 3-O-(3-O-methylgallate)                                                                                                                                       | -6.0118776 | - | - | - | 50.5776  | 455.38888  |
| NEG06125 | 116951.7955 | 97167.04977 | -0.26737 | 0.335606 | 0.7266 | 0.14372 | Manniflavanone                                                                                                                                                            | -24.444479 | - | - | - | 50.57345 | 589.466189 |
| NEG06126 | 63539.11274 | 53815.638   | -0.23962 | 0.433835 | 0.77   | 0.10069 | Myricatin                                                                                                                                                                 | -4.9101638 | - | - | - | 50.55845 | 551.408011 |
| NEG06130 | 296680.7726 | 230656.4316 | -0.36317 | 0.022741 | 0.3565 | 0.33498 | Phosphotyrosine                                                                                                                                                           | 13.728005  | - | - | - | 50.45305 | 260.164709 |
| NEG06131 | 1278692.073 | 1128851.732 | -0.17981 | 0.174292 | 0.6335 | 0.43837 | 7'-O-Phosphohyromycin                                                                                                                                                     | -18.264703 | - | - | - | 50.45285 | 606.481628 |
| NEG06134 | 737367.2968 | 659559.8314 | -0.16088 | 0.321396 | 0.7192 | 0.30195 | 6-(10-(3,4-dihydroxy-6-methyl-5-oxooxan-2-yl)-5-hydroxy-2,4-dihydroxy-2                                                                                                   | -23.841995 | - | - | - | 50.36565 | 619.493929 |
| NEG06141 | 62384.97713 | 73261.85934 | 0.231864 | 0.786802 | 0.927  | 0.05073 | Amaranth                                                                                                                                                                  | -5.510927  | - | - | - | 50.2587  | 603.462392 |
| NEG06146 | 608443.8379 | 598068.4067 | -0.02481 | 0.947267 | 0.9827 | 0.07903 | 4-Glutathionyl cyclophosphamide                                                                                                                                           | 10.208019  | - | - | - | 50.2465  | 565.392105 |
| NEG06147 | 381433.7871 | 274671.723  | -0.47372 | 0.155051 | 0.6173 | 0.2908  | 4-Amino-anhydrotetracycline                                                                                                                                               | 23.08514   | - | - | - | 50.2438  | 397.36802  |
| NEG06149 | 2585092.623 | 2303493.626 | -0.16639 | 0.622401 | 0.8589 | 0.46569 | 5-Acetylamino-6-formylamino-3-methyluracil                                                                                                                                | 16.022643  | - | - | - | 50.23535 | 225.185748 |

|          |             |             |          |          |        |         |                                                                                 |            |   |   |   |          |            |
|----------|-------------|-------------|----------|----------|--------|---------|---------------------------------------------------------------------------------|------------|---|---|---|----------|------------|
| NEG06155 | 217472.099  | 151445.3771 | -0.52203 | 0.0614   | 0.501  | 0.28373 | 2,4,6-Trihydroxybenzophenone                                                    | -3.3250191 | - | - | - | 50.1834  | 229.208058 |
| NEG06159 | 13893.34631 | 20266.72552 | 0.544719 | 0.197964 | 0.656  | 0.07865 | 2-(2-(1,3,4-trihydroxy-2-hydroxy-4-hydroxyphenyl)-4-oxo-4H-chromen-2-yl)ethanol | 2.4578922  | - | - | - | 50.14575 | 815.712731 |
| NEG06161 | 3590822.276 | 3652760.23  | 0.024673 | 0.922882 | 0.9741 | 0.03842 | Endalin                                                                         | 15.462471  | - | - | - | 50.0906  | 228.204568 |
| NEG06165 | 2139356.783 | 2068880.673 | -0.04833 | 0.775684 | 0.9235 | 0.12513 | Podophyllotoxone                                                                | 4.088055   | - | - | - | 49.9926  | 411.383809 |
| NEG06166 | 13516.14727 | 27475.97509 | 1.023487 | 0.133534 | 0.5988 | 0.12916 | Uroporphyrin III                                                                | -13.895637 | - | - | - | 49.9926  | 829.72808  |
| NEG06167 | 4877525.396 | 5343512.709 | 0.131639 | 0.622979 | 0.859  | 0.22654 | Phosphoenolpyruvate                                                             | 0.1852154  | - | - | - | 49.9398  | 167.034755 |
| NEG06168 | 178333.3174 | 294129.5075 | 0.721875 | 0.391192 | 0.7513 | 0.29621 | Digallate                                                                       | 8.5123645  | - | - | - | 49.93775 | 321.219266 |
| NEG06169 | 597130.8468 | 650301.7497 | 0.123062 | 0.515857 | 0.8114 | 0.19179 | 6-Deoxy-6-sulfo-D-fructose 1-phosphate                                          | -10.697555 | - | - | - | 49.9357  | 323.188855 |
| NEG06178 | 114522.8064 | 141791.2664 | 0.308134 | 0.473537 | 0.792  | 0.12138 | Cyanidin 3-O-(3,6-dihydroxy-2,2-dimethyl-4-chromanone glucoside)                | -22.678963 | - | - | - | 49.872   | 620.455829 |
| NEG06180 | 34453.37102 | 28237.6979  | -0.28702 | 0.506541 | 0.8064 | 0.05699 | Pyrazosulfuron-ethyl                                                            | 9.1019205  | - | - | - | 49.8363  | 413.390195 |
| NEG06185 | 1052990.952 | 1286663.067 | 0.289141 | 0.483728 | 0.798  | 0.25942 | Chloropropylate                                                                 | 4.9483122  | - | - | - | 49.6143  | 338.207502 |
| NEG06187 | 633626.6767 | 608114.8409 | -0.05929 | 0.858707 | 0.9535 | 0.03126 | 6-Amino-6-deoxyfucalose                                                         | 24.818204  | - | - | - | 49.6061  | 412.387083 |
| NEG06188 | 82489.66179 | 85639.54016 | 0.054064 | 0.883647 | 0.9605 | 0.01368 | 6-(2-Carboxyethyl)-1-hydroxy-2,2-dimethyl-4-chromanone glucoside                | -17.390851 | - | - | - | 49.5922  | 425.399708 |
| NEG06189 | 2983165.436 | 2643727.16  | -0.17427 | 0.500798 | 0.8022 | 0.41018 | Diflunisal                                                                      | -18.590786 | - | - | - | 49.59145 | 249.185672 |
| NEG06190 | 4237248.411 | 2488526.624 | -0.76784 | 0.100248 | 0.5617 | 1.29586 | (1R,3R)-6-Hydroxy-2-succinylcyclohexa-2,4-diene-1-carboxylate                   | -2.5854457 | - | - | - | 49.5783  | 239.201502 |
| NEG06199 | 2459631.935 | 2689209.428 | 0.12874  | 0.700468 | 0.8986 | 0.25835 | Atoxin a(s)                                                                     | 2.3869582  | - | - | - | 49.27615 | 251.201325 |
| NEG06200 | 204141.4442 | 161860.3159 | -0.33482 | 0.274151 | 0.6994 | 0.16696 | Pseudohypericin                                                                 | 6.8055828  | - | - | - | 49.2661  | 519.438865 |
| NEG06204 | 1309359.463 | 2841608.645 | 1.117847 | 0.457913 | 0.7822 | 0.95428 | 1-(5'-Phosphoribosyl)-5-amino-4-imidazolecarboxamide                            | 3.8303021  | - | - | - | 49.22745 | 337.205219 |
| NEG06207 | 10278157.08 | 12513554.23 | 0.28391  | 0.597007 | 0.8463 | 1.4657  | Cobaltous sulfate                                                               | 6.3304606  | - | - | - | 49.1981  | 153.989505 |
| NEG06214 | 1443549.691 | 1464203.394 | 0.020495 | 0.970722 | 0.9916 | 0.08418 | Porphobilinogen                                                                 | 2.4366368  | - | - | - | 49.0265  | 225.222475 |
| NEG06215 | 162203.5798 | 832801.5309 | 2.360167 | 0.174586 | 0.6336 | 0.93389 | 1-(5-Phospho-D-ribose)-5-amino-4-imidazolecarboxylate                           | 17.5593    | - | - | - | 49.01385 | 338.194579 |
| NEG06216 | 111057.24   | 115936.8846 | 0.062036 | 0.80161  | 0.9311 | 0.00285 | Propiconazole                                                                   | -0.0804797 | - | - | - | 48.9727  | 341.213096 |
| NEG06218 | 312094.9566 | 192427.5241 | -0.69767 | 0.049312 | 0.4711 | 0.36797 | Mandelonitrile rutinoside                                                       | -8.0177786 | - | - | - | 48.9505  | 440.418284 |

|          |             |             |          |          |        |         |                                                                                                                  |            |   |   |   |          |            |
|----------|-------------|-------------|----------|----------|--------|---------|------------------------------------------------------------------------------------------------------------------|------------|---|---|---|----------|------------|
| NEG06219 | 66305.12392 | 83259.15657 | 0.328489 | 0.381287 | 0.7477 | 0.11457 | Clitocine                                                                                                        | -24.409458 | - | - | - | 48.9326  | 286.215112 |
| NEG06220 | 1030799.698 | 987586.2767 | -0.06179 | 0.844282 | 0.9487 | 0.03163 | (2-(9-nyaroxy-2-oxo-2H,8H,9H-furo[2,3-b]chromen-8-yl)propanoic acid                                              | 5.5879046  | - | - | - | 48.9008  | 439.415184 |
| NEG06226 | 472185.6826 | 499312.6258 | 0.080589 | 0.810434 | 0.9347 | 0.08404 | Neopterin                                                                                                        | -10.76754  | - | - | - | 48.7921  | 252.204697 |
| NEG06228 | 61950.39456 | 57784.42776 | -0.10043 | 0.74623  | 0.9139 | 0.01638 | cyclo-Dopa-glucuronylglucoside                                                                                   | 24.078598  | - | - | - | 48.7623  | 532.442368 |
| NEG06229 | 40907.24597 | 43294.32905 | 0.081822 | 0.726513 | 0.9068 | 0.01558 | Methotrexate                                                                                                     | -2.36935   | - | - | - | 48.75445 | 453.430947 |
| NEG06230 | 7257.844309 | 31751.71138 | 2.129221 | 0.026134 | 0.3665 | 0.20712 | 5,4,3-trinyaroxy-6-(1,5-hydroxy-8,8-dimethyl-4-oxo-2-phenyl-4H-pyridin-2-yl)pyridin-2(1H)-one                    | 24.969705  | - | - | - | 48.7491  | 511.47252  |
| NEG06231 | 281674.6679 | 292759.2951 | 0.055685 | 0.758928 | 0.918  | 0.06122 | Biochanin A 7-O-(6-O-malonyl-beta-D-glucoside)                                                                   | -7.8450447 | - | - | - | 48.7491  | 531.438846 |
| NEG06232 | 46262256.09 | 38644325.95 | -0.25958 | 0.50946  | 0.8082 | 2.10341 | Cyperaquinone                                                                                                    | -9.7409507 | - | - | - | 48.7339  | 241.217164 |
| NEG06234 | 258449.4763 | 361311.1603 | 0.48336  | 0.072221 | 0.5226 | 0.37306 | 1-Methyl 2-galloylgalactarate                                                                                    | -15.389978 | - | - | - | 48.65375 | 375.256533 |
| NEG06237 | 210206.4043 | 485563.7439 | 1.207854 | 0.021214 | 0.3495 | 0.67282 | 11-O-Demethylpradimicinone I                                                                                     | 17.553038  | - | - | - | 48.6275  | 534.457822 |
| NEG06239 | 678117.8831 | 1458935.249 | 1.105308 | 0.004745 | 0.1927 | 1.23333 | 5'-phosphoribostamycin                                                                                           | 16.98883   | - | - | - | 48.5758  | 533.454403 |
| NEG06240 | 491177.3318 | 414476.5017 | -0.24495 | 0.245941 | 0.6842 | 0.27721 | 2,4-Dichloro-cis,cis-mucote                                                                                      | -11.068617 | - | - | - | 48.5714  | 209.989988 |
| NEG06242 | 252931.1046 | 543860.2384 | 1.104491 | 0.00016  | 0.0947 | 0.76004 | Tiron                                                                                                            | -6.0753354 | - | - | - | 48.5557  | 313.191515 |
| NEG06245 | 379790.2089 | 220416.3019 | -0.78497 | 0.01635  | 0.3189 | 0.51382 | 5-Hydroxymethyldeoxycytidine                                                                                     | 22.689275  | - | - | - | 48.5284  | 336.223475 |
| NEG06248 | 157735.695  | 189245.8889 | 0.262753 | 0.347038 | 0.7313 | 0.17939 | Vitisin A                                                                                                        | 22.83016   | - | - | - | 48.4496  | 560.473842 |
| NEG06249 | 421165.9685 | 570323.1737 | 0.437391 | 0.205744 | 0.6619 | 0.41658 | 1-(4-nyaroxy-2-methylpyrimid-5-yl)methyl 2-(beta-D-glucopyranosyl)-3-(1-hydroxy-4-oxo-4H-chromen-2-yl)propanoate | 20.297027  | - | - | - | 48.4277  | 339.215229 |
| NEG06250 | 496858.9792 | 816626.5889 | 0.71684  | 0.019446 | 0.3424 | 0.7321  | hydroxy-4-oxo-4H-chromen-2-yl)propanoic acid                                                                     | -4.2805312 | - | - | - | 48.4172  | 365.291155 |
| NEG06253 | 3685355.249 | 1829700.18  | -1.0102  | 0.018507 | 0.3344 | 1.85253 | Fosetyl                                                                                                          | -8.8410739 | - | - | - | 48.3702  | 109.04065  |
| NEG06259 | 539569.6626 | 440930.2875 | -0.29126 | 0.257048 | 0.6894 | 0.30256 | 104-1                                                                                                            | 2.0579562  | - | - | - | 48.2506  | 467.446387 |
| NEG06260 | 130538.0563 | 145664.3126 | 0.158177 | 0.653683 | 0.8741 | 0.0836  | (1,3,4,5-trinyaroxy-6-[3,5,7-trihydroxy-2-(2,4,5-tribenzyloxyphenyl)-3,4-dihydroxyphenyl]propanoic acid          | 12.394622  | - | - | - | 48.2506  | 547.469521 |
| NEG06262 | 2489261.482 | 1575376.787 | -0.66002 | 0.059976 | 0.4982 | 1.14134 | Clitidine 5'-phosphate                                                                                           | -19.506652 | - | - | - | 48.2416  | 349.204492 |
| NEG06263 | 2076767.192 | 2643168.088 | 0.347929 | 0.350982 | 0.7323 | 0.73217 | 2,3-Diamino-6-(2-phospho-D-ribofuran-5-yl)pyridin-4(1H)-one                                                      | 14.970149  | - | - | - | 48.2416  | 352.223811 |
| NEG06264 | 253411.7464 | 425751.4663 | 0.748528 | 0.238621 | 0.6811 | 0.45511 | (1,3,4,5-trinyaroxy-6-[3,5,7-trihydroxy-2-(2,4,5-tribenzyloxyphenyl)-3,4-dihydroxyphenyl]propanoic acid          | 2.9505504  | - | - | - | 48.2416  | 557.454371 |

|          |             |             |          |          |        |         |                                                                                     |            |   |   |   |          |            |
|----------|-------------|-------------|----------|----------|--------|---------|-------------------------------------------------------------------------------------|------------|---|---|---|----------|------------|
| NEG06265 | 308364.6762 | 421855.6806 | 0.452112 | 0.029319 | 0.3836 | 0.43198 | 5&apos;-<br>Butyrylphosphouridine                                                   | 8.7388496  | - | - | - | 48.23975 | 393.267269 |
| NEG06273 | 373480.269  | 358624.668  | -0.05856 | 0.831943 | 0.9445 | 0.05027 | 3,4,5-trimethoxy-6-(1S-<br>hydroxy-2-<br>(hydroxymethyl) 2                          | -20.973205 | - | - | - | 48.16835 | 309.241216 |
| NEG06275 | 62565109.73 | 48830516.05 | -0.35758 | 0.024893 | 0.3596 | 4.29581 | Nifurthiazole                                                                       | 7.2535822  | - | - | - | 48.1008  | 253.217167 |
| NEG06278 | 409513.2726 | 939346.5767 | 1.197747 | 0.028055 | 0.3758 | 0.91959 | 3,4,5-trimethoxy-6-(1S-<br>hydroxy-4-oxo-2-phenyl-<br>8 (2,4,5-trihydroxyoxyan 2    | 23.100265  | - | - | - | 47.99    | 561.485717 |
| NEG06280 | 4143341.378 | 3232677.552 | -0.35807 | 0.150727 | 0.6145 | 1.15901 | Cacodylate                                                                          | 8.0152163  | - | - | - | 47.95475 | 136.991229 |
| NEG06282 | 1137230.713 | 860478.9179 | -0.40231 | 0.027882 | 0.3745 | 0.59057 | Benzoylprop-ethyl                                                                   | 14.31275   | - | - | - | 47.93955 | 365.236465 |
| NEG06293 | 1388838.28  | 1222675.883 | -0.18384 | 0.603307 | 0.8497 | 0.22644 | 4-(2-(3-Carboxy-2-<br>hydroxy-3-<br>methoxyphenyl) 2                                | 23.733971  | - | - | - | 47.122   | 351.250884 |
| NEG06296 | 154363.135  | 103818.2594 | -0.57227 | 0.192805 | 0.6509 | 0.21571 | Nifursol                                                                            | 14.519352  | - | - | - | 47.02495 | 364.210126 |
| NEG06301 | 14795092.54 | 14292168.94 | -0.04989 | 0.687133 | 0.89   | 0.16907 | 7-Methylinosine                                                                     | -5.9623314 | - | - | - | 46.8492  | 282.251635 |
| NEG06302 | 35005.04879 | 31125.74416 | -0.16945 | 0.543443 | 0.8268 | 0.0475  | Proanthocyanidin A2                                                                 | 7.4403826  | - | - | - | 46.8135  | 575.501413 |
| NEG06303 | 138793.9231 | 401665.476  | 1.53305  | 0.016864 | 0.3231 | 0.62976 | Prostalinid A                                                                       | -2.0236553 | - | - | - | 46.7814  | 393.323025 |
| NEG06308 | 86391.70833 | 221366.9362 | 1.357475 | 0.045493 | 0.4515 | 0.47029 | Maysin 3&apos;-methyl<br>ether                                                      | -8.6627047 | - | - | - | 46.5396  | 589.517008 |
| NEG06312 | 93045.51014 | 161232.7059 | 0.793136 | 0.141786 | 0.6087 | 0.27222 | Prunin 6&apos;&apos;-O-<br>gallate                                                  | -7.6600019 | - | - | - | 46.36535 | 585.485831 |
| NEG06317 | 1143629.755 | 2163964.231 | 0.920057 | 0.072534 | 0.5226 | 1.07626 | N7-Methylguanosine                                                                  | 9.2087118  | - | - | - | 46.23395 | 297.27067  |
| NEG06318 | 3941869.705 | 6278609.35  | 0.671565 | 0.053607 | 0.4853 | 1.73914 | 2&apos;-Carboxy-4-<br>[bis(2-chloroethyl)amino]-<br>2-methylazobenzene              | -24.863283 | - | - | - | 46.2149  | 379.251669 |
| NEG06324 | 46865.64428 | 111898.7343 | 1.255591 | 0.005758 | 0.2144 | 0.34514 | N7-Methylguanosine                                                                  | 2.7439989  | - | - | - | 45.9422  | 457.228981 |
| NEG06333 | 2054327.15  | 1487066.339 | -0.4662  | 0.387257 | 0.7495 | 0.43553 | 5&apos;-diphosphate<br>3,4,5-trimethoxy-6-<br>(2,3,4,5-<br>tetrahydroxybenzoyloxy)6 | -0.5532508 | - | - | - | 45.6256  | 361.235523 |
| NEG06344 | 6054527.772 | 4717382.888 | -0.36003 | 0.217611 | 0.6665 | 1.08964 | 1H-isochromene-3-<br>(carboxyloxy)oxane 2                                           | -10.882464 | - | - | - | 44.59825 | 365.266737 |
| NEG06346 | 37405.50026 | 124459.2221 | 1.734351 | 0.001175 | 0.0993 | 0.41378 | Ethalfuralin                                                                        | 3.0401138  | - | - | - | 44.4764  | 332.256937 |
| NEG06349 | 2692893.484 | 1384122.146 | -0.96019 | 0.013633 | 0.3012 | 1.54239 | 2,2-Bis(4-<br>hydroxyphenyl)hexafluoro                                              | -5.2619206 | - | - | - | 44.24655 | 335.220054 |
| NEG06354 | 17861662.67 | 18123891.75 | 0.021026 | 0.912676 | 0.971  | 0.20679 | 2-nyaroxy-3-(4-nyaroxy-3-<br>(sulfooxyphenyl)propanoi                               | -20.654243 | - | - | - | 43.87675 | 277.216977 |
| NEG06356 | 8700100.695 | 7189440.835 | -0.27515 | 0.143554 | 0.6122 | 1.11776 | L-Amino-4-nydroxy-6-(D-<br>erythro-1,2,3-<br>(trihydroxyoxy) 7 8                    | -11.137566 | - | - | - | 43.87675 | 254.220481 |
| NEG06357 | 57133240.49 | 65888867.28 | 0.205704 | 0.461592 | 0.7839 | 1.70556 | N-Benzoyl-4-<br>hydroxyanthranilate                                                 | 7.6656705  | - | - | - | 43.87675 | 256.236095 |

|          |             |             |          |          |        |         |                                                                      |            |   |   |   |          |            |
|----------|-------------|-------------|----------|----------|--------|---------|----------------------------------------------------------------------|------------|---|---|---|----------|------------|
| NEG06360 | 181029.584  | 158092.9117 | -0.19545 | 0.517182 | 0.8117 | 0.10545 | 5,4,5-trinyaroxy-6-(1,3,5-trimethoxy-4-(sulfoxy)phenyl)benzofuran    | -4.0445683 | - | - | - | 43.8132  | 449.360902 |
| NEG06363 | 551209.0359 | 573080.2839 | 0.056138 | 0.819942 | 0.938  | 0.00711 | Bromobenzene                                                         | 4.5993548  | - | - | - | 43.7002  | 156.001346 |
| NEG06370 | 49489845.7  | 52215017.8  | 0.077332 | 0.865063 | 0.9549 | 1.37042 | Endothion                                                            | 18.559723  | - | - | - | 43.4319  | 279.232624 |
| NEG06372 | 110621844.8 | 191365108.1 | 0.790691 | 0.007651 | 0.2427 | 12.1141 | Coformycin                                                           | 9.2888819  | - | - | - | 43.40905 | 283.263864 |
| NEG06373 | 2032693.227 | 1603659.219 | -0.34202 | 0.098115 | 0.5586 | 0.63495 | Psicofuranine                                                        | 24.064889  | - | - | - | 43.40905 | 296.267177 |
| NEG06374 | 21041892.86 | 36858955.2  | 0.808751 | 0.009666 | 0.2615 | 5.32282 | 5,5,7-trinyaroxy-2-(5-methoxyphenyl)-5H-chromen-5-ol                 | -1.7292804 | - | - | - | 43.40905 | 284.26723  |
| NEG06375 | 1850143.155 | 3326628.343 | 0.846424 | 0.009718 | 0.2615 | 1.62577 | Salicin                                                              | -0.1227049 | - | - | - | 43.40905 | 285.270488 |
| NEG06385 | 4246928.118 | 4237619.552 | -0.00317 | 0.990889 | 0.9983 | 0.04516 | Picein                                                               | -6.3952318 | - | - | - | 42.9325  | 297.279316 |
| NEG06389 | 5637931.164 | 5697081.176 | 0.015057 | 0.957185 | 0.9865 | 0.02141 | 1-(1-nyaroxy-5-(2-nyaroxy-4-methoxyphenyl)-3,4-dihydro-2H-1-benzoxan | 13.280862  | - | - | - | 42.79975 | 367.357616 |
| NEG06390 | 494166.5229 | 65155.49998 | -2.92304 | 0.020201 | 0.3444 | 0.88163 | Ethiprole                                                            | -8.766487  | - | - | - | 42.7839  | 396.192241 |
| NEG06391 | 1753830.004 | 1699701.569 | -0.04523 | 0.838339 | 0.9471 | 0.05843 | (1-(1-nyaroxy-2-oxo-2H-chromen-8-yl)-3-methylbut-3-en-2-ol           | -6.4398935 | - | - | - | 42.77315 | 325.310622 |
| NEG06393 | 3811737.113 | 3941692.475 | 0.048367 | 0.719204 | 0.9041 | 0.31364 | Pyridafenthion                                                       | -2.7851167 | - | - | - | 42.6142  | 339.326276 |
| NEG06395 | 1082986.371 | 925222.3159 | -0.22714 | 0.261617 | 0.6909 | 0.28421 | Saxitoxin                                                            | 10.678965  | - | - | - | 42.5274  | 298.282419 |
| NEG06397 | 1137276.325 | 1193975.725 | 0.070191 | 0.653858 | 0.8741 | 0.22417 | Melicopine                                                           | 3.7001017  | - | - | - | 42.45925 | 312.298583 |
| NEG06405 | 4835974.207 | 3170369.173 | -0.60916 | 0.115023 | 0.5747 | 1.36483 | 5-FU                                                                 | -23.016699 | - | - | - | 41.71655 | 129.066929 |
| NEG06409 | 1347613.947 | 962204.2016 | -0.48599 | 0.604999 | 0.85   | 0.43927 | Adenylylselete                                                       | -19.321995 | - | - | - | 41.64625 | 473.162961 |
| NEG06413 | 6426354.204 | 4737376.006 | -0.43991 | 0.412102 | 0.7613 | 0.92619 | 2-Maleylacetate                                                      | -21.592437 | - | - | - | 41.4791  | 157.098109 |
| NEG06414 | 476506.8776 | 384567.476  | -0.30926 | 0.129952 | 0.5933 | 0.38489 | Haloxydine                                                           | 12.140166  | - | - | - | 41.47865 | 198.965451 |
| NEG06415 | 664326.5269 | 561706.7075 | -0.24208 | 0.703916 | 0.8994 | 0.03429 | 3-(Dichloromethylene)-2,5-pyrrolidinedione                           | -8.0587493 | - | - | - | 41.4702  | 178.980273 |
| NEG06429 | 361537.3098 | 343798.7963 | -0.07258 | 0.585992 | 0.8419 | 0.13564 | 3-(Dichloromethylene)-2,5-pyrrolidinedione                           | 11.281115  | - | - | - | 41.2175  | 178.983754 |
| NEG06443 | 11859484.75 | 11668433    | -0.02343 | 0.777785 | 0.9242 | 0.40816 | Formylphosphote                                                      | -22.014344 | - | - | - | 41.0581  | 108.996202 |
| NEG06464 | 932308.1601 | 874481.856  | -0.09238 | 0.866798 | 0.9556 | 0.15175 | L-3,4-Dihydroxybutan-2-one 4-phosphate                               | 0.7918253  | - | - | - | 40.8125  | 183.077269 |
| NEG06469 | 1350697.933 | 1298701.793 | -0.05663 | 0.39502  | 0.7526 | 0.21012 | 2,5-Furandicarboxylate                                               | -20.388582 | - | - | - | 40.7736  | 155.082541 |

|          |             |             |          |          |        |         |  |                                                                             |            |   |   |   |          |            |
|----------|-------------|-------------|----------|----------|--------|---------|--|-----------------------------------------------------------------------------|------------|---|---|---|----------|------------|
| NEG06470 | 833208.5417 | 858601.4227 | 0.043311 | 0.927161 | 0.9759 | 0.09467 |  | 3-Oxalomalate                                                               | -8.3795705 | - | - | - | 40.76875 | 205.097996 |
| NEG06471 | 3962159.096 | 3557297.214 | -0.15551 | 0.800731 | 0.9311 | 0.52902 |  | Trimethylselenonium                                                         | 0.3231813  | - | - | - | 40.7636  | 123.056363 |
| NEG06481 | 59600.52498 | 89216.86115 | 0.581991 | 0.012603 | 0.2923 | 0.19766 |  | Phosacetim                                                                  | 8.08511    | - | - | - | 40.59955 | 374.205757 |
| NEG06483 | 307296.1154 | 207421.2687 | -0.56707 | 0.20783  | 0.6619 | 0.32772 |  | Dihydroxyfumarate                                                           | 16.951894  | - | - | - | 40.5718  | 147.066233 |
| NEG06484 | 15312003.66 | 15466353.51 | 0.01447  | 0.914638 | 0.9719 | 0.09924 |  | Glyoxylate                                                                  | 16.545204  | - | - | - | 40.5364  | 73.0294483 |
| NEG06494 | 2223373.382 | 2190431.965 | -0.02153 | 0.872974 | 0.9572 | 0.11821 |  | Dihydrogen phosphate                                                        | 2.3152467  | - | - | - | 40.4453  | 95.9801479 |
| NEG06506 | 184674.588  | 89282.22636 | -1.04854 | 0.103599 | 0.5647 | 0.33554 |  | Radon-222                                                                   | 14.589399  | - | - | - | 40.3461  | 220.995962 |
| NEG06509 | 290584.0255 | 247909.9382 | -0.22914 | 0.653904 | 0.8741 | 0.08568 |  | Ferrous lactate                                                             | -10.318088 | - | - | - | 40.32935 | 232.975309 |
| NEG06525 | 1117015.824 | 2069564.662 | 0.889678 | 0.067818 | 0.5176 | 0.97447 |  | <sup>N</sup> -<br>Acetyldemethylphosphinot<br>bixin                         | 21.028054  | - | - | - | 40.1642  | 208.134021 |
| NEG06536 | 1643172.513 | 140253.1534 | -3.55038 | 0.028575 | 0.378  | 1.54175 |  | Furcozole-cis                                                               | 8.1925746  | - | - | - | 40.05885 | 395.187769 |
| NEG06547 | 323374.4286 | 332305.2943 | 0.039304 | 0.75769  | 0.918  | 0.02742 |  | Coumermic acid                                                              | -3.4459546 | - | - | - | 40.00775 | 546.460537 |
| NEG06550 | 98816.04813 | 133339.869  | 0.432291 | 0.499606 | 0.8016 | 0.10111 |  | 19-Bromoaplysiatoxin                                                        | 24.676262  | - | - | - | 39.98465 | 749.520843 |
| NEG06576 | 545388.1176 | 546207.5736 | 0.002166 | 0.995458 | 0.9987 | 0.05053 |  | <i>o</i> -Fluorocyclohexadiene-<br>cis,cis-1,2-diol-1-<br>carboxylate       | -6.0159017 | - | - | - | 39.7368  | 173.118176 |
| NEG06580 | 925478.4587 | 914915.4307 | -0.01656 | 0.88424  | 0.9606 | 0.06899 |  | alpha-1,5-L-<br>Arabinotetraose                                             | -16.219487 | - | - | - | 39.7257  | 545.45766  |
| NEG06582 | 1063468.634 | 1125493.548 | 0.08178  | 0.532357 | 0.8211 | 0.17989 |  | Glyphosate                                                                  | 4.0020795  | - | - | - | 39.687   | 168.0665   |
| NEG06585 | 52772.46543 | 105650.2406 | 1.001439 | 0.224095 | 0.6707 | 0.20799 |  | <sup>UDP</sup> - <sup>N</sup> -acetyl-D-<br>galactosamine 4,6-<br>bisulfate | 15.378965  | - | - | - | 39.6738  | 766.484626 |
| NEG06587 | 265071.7381 | 210237.3232 | -0.33436 | 0.638416 | 0.8672 | 0.17904 |  | Selenocysteine seleninic<br>acid                                            | -3.9136411 | - | - | - | 39.673   | 199.04394  |
| NEG06591 | 5792459.938 | 8385816.807 | 0.533775 | 0.012539 | 0.2923 | 2.18086 |  | Arbutin 6-phosphate                                                         | -9.704334  | - | - | - | 39.6527  | 351.220405 |
| NEG06592 | 10892453.18 | 9308390.005 | -0.22673 | 0.186224 | 0.6457 | 1.04197 |  | Dehypoxanthine<br>futalosine                                                | -5.117645  | - | - | - | 39.6527  | 295.263807 |
| NEG06596 | 306115.5127 | 489531.6486 | 0.677326 | 0.420009 | 0.7661 | 0.36921 |  | Hexaflurate                                                                 | 6.1082793  | - | - | - | 39.642   | 227.004416 |
| NEG06600 | 387821.9436 | 316511.6067 | -0.29314 | 0.102012 | 0.563  | 0.32877 |  | Pydanon                                                                     | 16.211601  | - | - | - | 39.6101  | 187.133873 |
| NEG06601 | 241101.122  | 183206.1006 | -0.39617 | 0.468912 | 0.7893 | 0.16713 |  | Clavulanic acid                                                             | -18.351826 | - | - | - | 39.60645 | 198.149868 |
| NEG06605 | 513027.4499 | 533987.8146 | 0.057771 | 0.665155 | 0.8796 | 0.04461 |  | Methyl 2-propenyl<br>selenide                                               | -12.015452 | - | - | - | 39.56745 | 134.0611   |

|          |             |             |          |          |        |         |                                                      |            |   |   |   |          |            |
|----------|-------------|-------------|----------|----------|--------|---------|------------------------------------------------------|------------|---|---|---|----------|------------|
| NEG06607 | 1337837.054 | 1521410.836 | 0.185507 | 0.763516 | 0.9202 | 0.35666 | Flutamide                                            | -12.017375 | - | - | - | 39.5594  | 275.201304 |
| NEG06615 | 189469.4661 | 242887.9733 | 0.358326 | 0.484238 | 0.798  | 0.20333 | cis-(Homo)2-aconitate                                | -23.201935 | - | - | - | 39.4843  | 201.149433 |
| NEG06629 | 1648961.391 | 1996039.363 | 0.275583 | 0.013758 | 0.3016 | 0.78693 | Phaseolic acid                                       | 14.400749  | - | - | - | 39.40105 | 295.226589 |
| NEG06635 | 185441.6868 | 221221.4319 | 0.254526 | 0.343661 | 0.73   | 0.20624 | N-Acetylglucosamine 4-sulfate                        | -6.333409  | - | - | - | 39.37195 | 300.261815 |
| NEG06637 | 793352.6201 | 727526.6516 | -0.12496 | 0.407427 | 0.7587 | 0.18796 | Tetrafluoroethylene                                  | -13.674057 | - | - | - | 39.3605  | 99.0063558 |
| NEG06639 | 458261.0783 | 488750.8801 | 0.09293  | 0.767094 | 0.9214 | 0.06347 | (1E,3E)-4-Hydroxybuta-1,3-diene-1,2,4-tricarboxylate | 10.662146  | - | - | - | 39.3605  | 201.113178 |
| NEG06646 | 348826.8706 | 299735.7711 | -0.21882 | 0.078444 | 0.5337 | 0.24268 | Phosphotyrosine                                      | 14.525609  | - | - | - | 39.35645 | 260.164917 |
| NEG06656 | 413199.9332 | 298985.9491 | -0.46676 | 0.079797 | 0.536  | 0.33572 | 1,2-Bis(4-nitrophenyl)ethane                         | 23.926973  | - | - | - | 39.3335  | 271.255338 |
| NEG06658 | 3223889.273 | 3686052.995 | 0.193275 | 0.365585 | 0.7399 | 0.73809 | Mefluidide                                           | -18.81871  | - | - | - | 39.3322  | 309.279584 |
| NEG06659 | 1234776.275 | 1768714.115 | 0.518451 | 0.054002 | 0.4853 | 0.81594 | Convicine                                            | 6.3438384  | - | - | - | 39.3322  | 304.23606  |
| NEG06660 | 1402077.067 | 1488059.281 | 0.085866 | 0.730123 | 0.9083 | 0.12804 | O-Methylsterigmatocystin                             | 21.628967  | - | - | - | 39.3322  | 337.310941 |
| NEG06663 | 1349010.144 | 1541115.398 | 0.192074 | 0.250836 | 0.6861 | 0.4824  | Chrysoeriol                                          | 10.045838  | - | - | - | 39.32485 | 299.25864  |
| NEG06666 | 140641.8656 | 214590.2416 | 0.609558 | 0.081587 | 0.5377 | 0.29592 | Selfotel                                             | 7.0924307  | - | - | - | 39.3065  | 222.157806 |
| NEG06667 | 73811.96809 | 83645.00329 | 0.180425 | 0.617434 | 0.8569 | 0.06082 | Catalposide                                          | -3.449305  | - | - | - | 39.3065  | 481.425659 |
| NEG06675 | 761076.9556 | 1012217.69  | 0.411405 | 0.174653 | 0.6336 | 0.50853 | 5-Nitrofurfural                                      | -18.91695  | - | - | - | 39.2685  | 140.071655 |
| NEG06677 | 833694.2292 | 592237.9334 | -0.49334 | 0.02089  | 0.3487 | 0.57919 | O-Phospho-L-serine                                   | -20.686097 | - | - | - | 39.26815 | 184.061395 |
| NEG06678 | 491329.5842 | 471637.7313 | -0.05901 | 0.861994 | 0.9541 | 0.00613 | S-(1,2-Dichlorovinyl)-L-cysteine                     | 19.565488  | - | - | - | 39.2605  | 215.082551 |
| NEG06683 | 694966.4531 | 670375.5346 | -0.05197 | 0.453681 | 0.7814 | 0.12815 | 5-Hydroxy-2-methylpyridine-4,5-dicarboxylate         | -18.061028 | - | - | - | 39.2511  | 196.134063 |
| NEG06685 | 2553142.833 | 2870956.641 | 0.169257 | 0.113234 | 0.5714 | 0.60448 | Diallat                                              | 1.4809255  | - | - | - | 39.2508  | 269.212224 |
| NEG06686 | 782202.6427 | 923169.4005 | 0.239053 | 0.39042  | 0.751  | 0.25008 | 4-Nitrophenyl phosphate                              | 2.3189465  | - | - | - | 39.2508  | 218.081931 |
| NEG06688 | 433103.3794 | 388056.3135 | -0.15845 | 0.410762 | 0.761  | 0.11182 | Schradan                                             | 6.9474617  | - | - | - | 39.23605 | 285.243412 |
| NEG06689 | 377448.9883 | 416899.1338 | 0.143417 | 0.392552 | 0.7513 | 0.10949 | Methyl aklanote                                      | 4.5733004  | - | - | - | 39.2285  | 409.3681   |
| NEG06694 | 242596.1163 | 297893.5576 | 0.29624  | 0.316735 | 0.7189 | 0.17446 | Nicergoline                                          | 10.780886  | - | - | - | 39.21475 | 483.383946 |



|          |             |             |          |          |        |         |                                                       |            |   |   |   |          |            |
|----------|-------------|-------------|----------|----------|--------|---------|-------------------------------------------------------|------------|---|---|---|----------|------------|
| NEG06695 | 621244.1563 | 724677.9713 | 0.22218  | 0.348233 | 0.7313 | 0.3277  | Icilin                                                | -5.5926683 | - | - | - | 39.2062  | 310.283082 |
| NEG06698 | 390277.6358 | 356196.4886 | -0.13183 | 0.477417 | 0.7932 | 0.08739 | D-Erythroascorbic acid<br>&apos;-a-D-glucoside        | -12.760755 | - | - | - | 39.2062  | 307.22749  |
| NEG06700 | 902793.0623 | 1083539.762 | 0.263285 | 0.044942 | 0.45   | 0.53544 | (L)-4-(L-tyrosyl-3-<br>sulfotophenyl)-2-oxo-3-        | 12.343856  | - | - | - | 39.20425 | 271.227384 |
| NEG06703 | 46013.27881 | 40844.33012 | -0.17191 | 0.603598 | 0.8497 | 0.06073 | (3,8,12,13,14-<br>pentahydroxy-9-oxo-11-              | -2.8193681 | - | - | - | 39.19095 | 693.470765 |
| NEG06707 | 1040583.723 | 1007654.243 | -0.04639 | 0.858272 | 0.9533 | 0.06395 | DHAP(6:0)                                             | 11.762302  | - | - | - | 39.1736  | 267.196678 |
| NEG06709 | 715789.3965 | 818533.0091 | 0.193505 | 0.506569 | 0.8064 | 0.26665 | Apraclonidine                                         | -14.258409 | - | - | - | 39.1736  | 244.097729 |
| NEG06713 | 149657.1304 | 137092.7031 | -0.12651 | 0.666948 | 0.8805 | 0.03917 | Glucovanillin                                         | -19.478108 | - | - | - | 39.1644  | 313.274502 |
| NEG06714 | 38347747.97 | 1090104.252 | -5.1366  | 0.019905 | 0.3429 | 7.93682 | 1D-1-Guaminio-3-amino-<br>1,3-dideoxy-scyllo-inositol | 8.4481297  | - | - | - | 39.159   | 299.20146  |
| NEG06717 | 558284.1664 | 526837.5774 | -0.08364 | 0.701966 | 0.8994 | 0.10195 | Ibandronate                                           | -20.723237 | - | - | - | 39.15645 | 318.215008 |
| NEG06721 | 358719.1577 | 398526.9673 | 0.151823 | 0.696216 | 0.8956 | 0.0832  | Bortezomib                                            | -24.452183 | - | - | - | 39.1499  | 383.220328 |
| NEG06722 | 450795.6552 | 582878.9054 | 0.370723 | 0.005036 | 0.2001 | 0.50565 | 7-Methylxanthosine                                    | -19.669147 | - | - | - | 39.1492  | 298.246837 |
| NEG06723 | 12885541.04 | 16449330.28 | 0.352276 | 0.104987 | 0.5673 | 2.13443 | Potassium dichromate                                  | -6.2308636 | - | - | - | 39.1492  | 293.17549  |
| NEG06727 | 574860.8152 | 556799.889  | -0.04605 | 0.645804 | 0.8704 | 0.02891 | S-(4-Bromophenyl)-<br>mercaptopyruvate                | -11.58811  | - | - | - | 39.1432  | 274.108635 |
| NEG06728 | 137410.9486 | 94525.56808 | -0.53972 | 0.226402 | 0.671  | 0.16825 | (-)-Epiarfelechin 3-gallate                           | -5.5403245 | - | - | - | 39.1432  | 425.363261 |
| NEG06729 | 2662778.072 | 3233136.181 | 0.280002 | 0.009143 | 0.2589 | 1.03566 | Bowdichione                                           | 11.681006  | - | - | - | 39.1404  | 297.243207 |
| NEG06730 | 2256123.849 | 2910378.259 | 0.36736  | 0.079635 | 0.5356 | 0.97653 | Aminoimidazole ribotide                               | -1.8336319 | - | - | - | 39.1404  | 294.178582 |
| NEG06732 | 669057.0008 | 684005.1385 | 0.031878 | 0.885324 | 0.961  | 0.09355 | Tricozarin A                                          | 19.216596  | - | - | - | 39.1404  | 293.212077 |
| NEG06735 | 143605.475  | 101577.7608 | -0.49953 | 0.024041 | 0.3593 | 0.26017 | 5-hydroxy-2-<br>(hydroxymethyl)-2-                    | -7.4974218 | - | - | - | 39.1344  | 229.180998 |
| NEG06736 | 314283.2116 | 328610.5532 | 0.064314 | 0.571755 | 0.8362 | 0.06997 | 5-Azacytidine                                         | -4.9711508 | - | - | - | 39.1344  | 243.196209 |
| NEG06738 | 1549994.19  | 1527377.964 | -0.02121 | 0.880098 | 0.9586 | 0.1161  | 5-Hydroxyisourate                                     | 0.5653259  | - | - | - | 39.1256  | 183.102527 |
| NEG06745 | 359439.2037 | 519431.3305 | 0.531185 | 0.693658 | 0.8938 | 0.17953 | Trifluridine                                          | -9.5804848 | - | - | - | 39.1114  | 295.189786 |
| NEG06746 | 1231807.209 | 1172466.658 | -0.07123 | 0.511251 | 0.8087 | 0.15495 | 5-[(1E)-4-Amino-4-<br>oxobut-2-enyl]amino}-L-         | 4.3639021  | - | - | - | 39.1114  | 200.173501 |
| NEG06747 | 1626114.538 | 1681296.546 | 0.048145 | 0.777361 | 0.9242 | 0.11289 | Podophyllotoxone                                      | 4.3983945  | - | - | - | 39.1114  | 411.383937 |

|          |             |             |          |          |        |         |                                                               |            |   |   |   |          |            |
|----------|-------------|-------------|----------|----------|--------|---------|---------------------------------------------------------------|------------|---|---|---|----------|------------|
| NEG06749 | 525289.4441 | 560770.5188 | 0.094298 | 0.557052 | 0.8301 | 0.14379 | O-Phospho-4-hydroxy-L-threonine                               | -18.236954 | - | - | - | 39.1093  | 214.087301 |
| NEG06752 | 450499.8556 | 418347.8634 | -0.10682 | 0.573648 | 0.8369 | 0.08806 | 4-(metynitrosamino)-1-(3-pyridyl)-1-butanol chromonide        | -15.452662 | - | - | - | 39.0932  | 384.355868 |
| NEG06753 | 2658066.484 | 2435281.599 | -0.12629 | 0.361244 | 0.7374 | 0.39281 | Endalin                                                       | 15.636418  | - | - | - | 39.0932  | 228.204607 |
| NEG06758 | 390644.8789 | 433352.3661 | 0.149683 | 0.581015 | 0.8399 | 0.0503  | Dichlozoline                                                  | -18.123786 | - | - | - | 39.0866  | 273.087856 |
| NEG06759 | 9944958.307 | 9562323.721 | -0.0566  | 0.531323 | 0.8206 | 0.41252 | Diamidafos                                                    | 13.386167  | - | - | - | 39.0834  | 199.170203 |
| NEG06760 | 1174882.547 | 1644923.62  | 0.485504 | 0.143344 | 0.6122 | 0.72997 | Tricalcium phosphate                                          | 2.3964888  | - | - | - | 39.0834  | 309.170167 |
| NEG06761 | 2444754.443 | 2320715.811 | -0.07512 | 0.76602  | 0.9214 | 0.16092 | Diflunisal                                                    | -18.299217 | - | - | - | 39.0834  | 249.185745 |
| NEG06763 | 427437.5624 | 400612.5593 | -0.09351 | 0.598543 | 0.8467 | 0.05897 | Tetracenomycin M                                              | 7.5863298  | - | - | - | 39.08145 | 355.321527 |
| NEG06764 | 18238665.46 | 16956421.89 | -0.10517 | 0.404578 | 0.7582 | 0.91739 | Pemirolast                                                    | -5.9427363 | - | - | - | 39.0802  | 227.201467 |
| NEG06765 | 1886213.355 | 1831613.191 | -0.04238 | 0.770728 | 0.9221 | 0.05685 | [2-metnoxy-4-(3,5,7-trihydroxy-3,4-dihydro-2H-1-benzoxan-2    | -0.2523198 | - | - | - | 39.0802  | 383.352626 |
| NEG06766 | 3935160.323 | 4189198.701 | 0.090252 | 0.580008 | 0.8394 | 0.32305 | 2,5-Dioxopentanoate                                           | 5.1253318  | - | - | - | 39.0802  | 129.09209  |
| NEG06774 | 1716751.204 | 1410377.939 | -0.2836  | 0.100176 | 0.5617 | 0.56343 | 5-Acetylamino-6-formylamino-3-methyluracil                    | 16.210307  | - | - | - | 39.07585 | 225.18579  |
| NEG06779 | 137162.4644 | 79528.81788 | -0.78634 | 0.034193 | 0.4099 | 0.27104 | Melarsoprol                                                   | 0.6100028  | - | - | - | 39.05825 | 397.331666 |
| NEG06780 | 1094064.631 | 1016968.039 | -0.10542 | 0.644265 | 0.8699 | 0.16709 | L-Selenomethionine                                            | 18.100906  | - | - | - | 39.0559  | 195.102573 |
| NEG06782 | 1407630.363 | 96209.14166 | -3.87095 | 0.332566 | 0.7243 | 0.85187 | 3-Deoxy-D-manno-octulosote                                    | 4.497475   | - | - | - | 39.0531  | 237.185795 |
| NEG06783 | 2499097.754 | 1998751.711 | -0.32231 | 0.137442 | 0.6023 | 0.68208 | (1R,6R)-6-Hydroxy-2-succinylcyclohexa-2,4-diene-1-carboxylate | -2.3929971 | - | - | - | 39.0527  | 239.201549 |
| NEG06791 | 1280146.404 | 1088926.727 | -0.2334  | 0.457017 | 0.7822 | 0.30071 | Barbiturate                                                   | -19.553174 | - | - | - | 39.0303  | 127.076419 |
| NEG06793 | 158542.8197 | 163552.0254 | 0.044877 | 0.878153 | 0.9584 | 0.02502 | (2-([2-(9-((2E)-2-methylbut-2-enyl)oxy)-2                     | 19.628302  | - | - | - | 39.03    | 481.462193 |
| NEG06794 | 129814.1526 | 124382.851  | -0.06166 | 0.840662 | 0.9478 | 0.03651 | [3-(3,5,7-trihydroxy-6-methoxy-4-oxo-4H-chroman-2             | 8.578133   | - | - | - | 39.02995 | 395.316123 |
| NEG06795 | 281007.8127 | 431114.045  | 0.617459 | 0.468482 | 0.7893 | 0.3753  | rciclasine                                                    | 10.056985  | - | - | - | 39.02995 | 306.251313 |
| NEG06798 | 826461.888  | 843576.8804 | 0.029571 | 0.836808 | 0.9465 | 0.03433 | 2,5-Diketo-5-methylthiopentyl-1-                              | 4.4665835  | - | - | - | 39.0266  | 241.180505 |
| NEG06799 | 4649717.504 | 4034589.053 | -0.20472 | 0.065777 | 0.5118 | 0.82261 | 5-nyaroxy-2-hietnyl-2-[(sulfooxy)methyl]propanoic acid        | 14.663843  | - | - | - | 39.02655 | 213.185864 |
| NEG06800 | 388141.7904 | 295444.1461 | -0.3937  | 0.217669 | 0.6665 | 0.28183 | Chlorogete                                                    | 11.898549  | - | - | - | 39.0232  | 353.305639 |

|          |             |             |          |          |        |         |  |                                                                  |            |   |   |   |          |            |
|----------|-------------|-------------|----------|----------|--------|---------|--|------------------------------------------------------------------|------------|---|---|---|----------|------------|
| NEG06801 | 627360.5098 | 581853.5976 | -0.10864 | 0.622265 | 0.8589 | 0.18007 |  | Alendronic acid                                                  | 15.207743  | - | - | - | 39.0232  | 248.092512 |
| NEG06803 | 41805.41311 | 50052.93693 | 0.259765 | 0.795702 | 0.9298 | 0.00832 |  | Remoxipride                                                      | -6.1657998 | - | - | - | 39.0232  | 370.259434 |
| NEG06806 | 2097105.638 | 2404060.996 | 0.197074 | 0.564539 | 0.8333 | 0.37195 |  | Atoxin a(s)                                                      | 2.7238295  | - | - | - | 39.0185  | 251.20141  |
| NEG06807 | 1226174.915 | 977536.6029 | -0.32694 | 0.116079 | 0.5757 | 0.56516 |  | Meconic acid                                                     | 11.400664  | - | - | - | 39.0138  | 199.097505 |
| NEG06811 | 57477.17503 | 62170.52314 | 0.113242 | 0.824279 | 0.9407 | 0.0215  |  | 1-Nitro-7-hydroxy-8-glutathionyl-7,8-dihydroxthalane             | -11.435328 | - | - | - | 39.0017  | 495.478046 |
| NEG06812 | 1246070.162 | 16439048.05 | 3.72167  | 0.000137 | 0.0947 | 5.81073 |  | 1-Methylseleno-N-acetyl-D-galactosamine                          | -7.2977981 | - | - | - | 38.987   | 297.185547 |
| NEG06813 | 2511748.534 | 2271390.675 | -0.14512 | 0.695382 | 0.8947 | 0.233   |  | 3,4,5-trihydroxy-6-[[3-methoxy-2                                 | 15.256192  | - | - | - | 38.9833  | 455.352686 |
| NEG06815 | 1600735.283 | 1617912.04  | 0.015398 | 0.921499 | 0.9739 | 0.04431 |  | 6-Hydroxyprotopine                                               | 0.9384981  | - | - | - | 38.9833  | 368.36107  |
| NEG06816 | 243796.5744 | 279076.8568 | 0.194985 | 0.761304 | 0.9195 | 0.08253 |  | Quercetin 3-sulfate                                              | 23.323667  | - | - | - | 38.9833  | 381.30054  |
| NEG06819 | 365093.2223 | 515055.7231 | 0.496464 | 0.211727 | 0.6624 | 0.31008 |  | 2-(2,4-dimethoxy-5-methoxyphenyl)-3,5,7-trihydroxy-4H-chromen-4  | 22.588508  | - | - | - | 38.96705 | 331.264229 |
| NEG06828 | 929231.3188 | 1077622.508 | 0.213742 | 0.089268 | 0.5506 | 0.39739 |  | Selenomethionine Selenoxide                                      | -3.6313321 | - | - | - | 38.9264  | 211.097653 |
| NEG06829 | 264741.2918 | 165858.3674 | -0.67463 | 0.108106 | 0.5681 | 0.37341 |  | 2,2-Bis(4-chlorophenyl)ethanol                                   | -13.360391 | - | - | - | 38.9203  | 266.139654 |
| NEG06831 | 7941628.166 | 6971706.913 | -0.18792 | 0.041424 | 0.4403 | 1.08282 |  | Angelicin                                                        | -9.0060645 | - | - | - | 38.90385 | 185.154547 |
| NEG06836 | 137553.8072 | 225826.1593 | 0.715217 | 0.548349 | 0.8287 | 0.15483 |  | 2-(2,5-dimethoxy-4-methoxyphenyl)-3,5,6,7-tetrahydro-2,4-dihydro | 6.879352   | - | - | - | 38.8874  | 349.274133 |
| NEG06837 | 256421.9352 | 237503.3071 | -0.11057 | 0.571916 | 0.8362 | 0.09383 |  | Furamizole                                                       | -24.160992 | - | - | - | 38.8871  | 287.20146  |
| NEG06839 | 643031.7941 | 501826.5322 | -0.3577  | 0.187851 | 0.6466 | 0.31404 |  | Triphenyl phosphate                                              | -3.7293044 | - | - | - | 38.88515 | 325.274607 |
| NEG06841 | 1591542.297 | 492447.7389 | -1.69238 | 0.347953 | 0.7313 | 0.73972 |  | Vicianose                                                        | -14.713116 | - | - | - | 38.87845 | 311.258629 |
| NEG06846 | 906571.0002 | 1081129.623 | 0.254048 | 0.098098 | 0.5586 | 0.46771 |  | 3,4-Dihydroxymandelate                                           | -0.1869307 | - | - | - | 38.85425 | 183.138789 |
| NEG06847 | 1909859.855 | 21091459.74 | 3.46512  | 0.183323 | 0.642  | 4.67915 |  | Inosine-5'-carboxylate                                           | -19.505715 | - | - | - | 38.8529  | 311.222233 |
| NEG06848 | 1108069.995 | 846074.56   | -0.38919 | 0.019859 | 0.3429 | 0.61653 |  | Nicotite D-ribonucleotide                                        | -16.618713 | - | - | - | 38.8529  | 335.199036 |
| NEG06850 | 493326.7505 | 507397.6808 | 0.040573 | 0.862193 | 0.9541 | 0.09566 |  | hesperetin 3-O-sulfate                                           | 5.6352368  | - | - | - | 38.8435  | 381.336878 |
| NEG06851 | 785692.3143 | 696930.7568 | -0.17295 | 0.549229 | 0.8287 | 0.16867 |  | sn-Glycero-3-phospho-1-inositol                                  | -0.9137557 | - | - | - | 38.8419  | 333.206718 |
| NEG06853 | 2160417.76  | 1636310.861 | -0.40086 | 0.03859  | 0.4318 | 0.9021  |  | Tris(1-aziridinyl)phosphine oxide                                | -18.003746 | - | - | - | 38.839   | 172.142306 |

|          |             |             |          |          |        |         |                                                                                                                    |            |   |   |   |          |            |
|----------|-------------|-------------|----------|----------|--------|---------|--------------------------------------------------------------------------------------------------------------------|------------|---|---|---|----------|------------|
| NEG06854 | 283199.1561 | 292276.2506 | 0.045516 | 0.890228 | 0.9634 | 0.04845 | Silandrin                                                                                                          | 2.4749804  | - | - | - | 38.8365  | 465.430678 |
| NEG06859 | 45093071.34 | 791868.872  | -5.8315  | 0.021103 | 0.3495 | 8.61352 | Urate-3-ribonucleoside                                                                                             | 15.748273  | - | - | - | 38.827   | 299.222351 |
| NEG06860 | 1126633.663 | 1211441.122 | 0.104706 | 0.561111 | 0.8325 | 0.20754 | sn-Glycerol 3-phosphate                                                                                            | -0.478079  | - | - | - | 38.8175  | 171.066341 |
| NEG06865 | 6159406.997 | 8717847.42  | 0.50118  | 0.004312 | 0.186  | 2.1569  | 2,3,4-trihydroxy-5-(3,4,5-trihydroxybenzoyloxy)benzoic acid                                                        | -7.1958083 | - | - | - | 38.8143  | 337.21429  |
| NEG06869 | 1019072.567 | 672638.2196 | -0.59935 | 0.1508   | 0.6145 | 0.69182 | Isocil                                                                                                             | -18.798958 | - | - | - | 38.8071  | 246.077178 |
| NEG06874 | 221078.2889 | 157400.2757 | -0.49012 | 0.562278 | 0.8325 | 0.16004 | beta-D-5-[2-Deoxy-2-(dimethylarsinyl)ribofuran-5-yl]-D-ribofuranose                                                | 9.7219851  | - | - | - | 38.79125 | 391.251537 |
| NEG06883 | 111485.7966 | 130680.6996 | 0.229186 | 0.549509 | 0.8288 | 0.09607 | (4R,6R)-2-hydroxy-5-(6-hydroxy-3-oxo-2,3-dihydro-1-benzofuran-2-ylidene)-6-oxo-1,2,3,4-tetrahydropyridin-4(1H)-one | -16.261707 | - | - | - | 38.76865 | 451.415366 |
| NEG06886 | 202361.1297 | 251853.6483 | 0.315653 | 0.448834 | 0.7796 | 0.16155 | Tuliposide B                                                                                                       | 1.9822927  | - | - | - | 38.7661  | 293.248507 |
| NEG06888 | 153057.9835 | 122779.7114 | -0.31801 | 0.118292 | 0.5808 | 0.15066 | Thiadiazolidinethione                                                                                              | -3.0553836 | - | - | - | 38.7661  | 341.269478 |
| NEG06889 | 84511.17421 | 73114.21153 | -0.20899 | 0.474953 | 0.7927 | 0.07016 | Cyflufemid                                                                                                         | 3.3135265  | - | - | - | 38.7661  | 411.34729  |
| NEG06891 | 216712.7593 | 155728.4001 | -0.47675 | 0.033923 | 0.4077 | 0.31111 | Nifuradene                                                                                                         | 17.00523   | - | - | - | 38.7604  | 223.170036 |
| NEG06893 | 193778.6828 | 187107.5262 | -0.05054 | 0.866094 | 0.9555 | 0.02143 | Decarbamoylgonautoxin 1                                                                                            | 12.84212   | - | - | - | 38.7553  | 367.321153 |
| NEG06895 | 248952.8816 | 227409.5853 | -0.13058 | 0.874248 | 0.9574 | 0.1659  | 5-Hydroxydantrolene                                                                                                | 9.760262   | - | - | - | 38.7547  | 329.248347 |
| NEG06896 | 282654.6375 | 294557.2014 | 0.059507 | 0.859931 | 0.9535 | 0.0365  | Cefacetrile                                                                                                        | -7.8811296 | - | - | - | 38.7518  | 338.314049 |
| NEG06902 | 141666.5866 | 331835.0474 | 1.227967 | 0.154446 | 0.6173 | 0.46465 | Diclobutrazol                                                                                                      | 8.5467775  | - | - | - | 38.72945 | 327.232429 |
| NEG06905 | 936727.1322 | 2123157.648 | 1.180511 | 0.321411 | 0.7192 | 1.04366 | {[4-(1-methoxy-2-oxo-2H-chromen-6-yl)-2-oxobut-3-en-1-yl]sulfonic acid                                             | -8.3336659 | - | - | - | 38.7142  | 339.289887 |
| NEG06910 | 190878.3038 | 165238.1262 | -0.20811 | 0.413023 | 0.7619 | 0.15653 | Carboxyphosphamide                                                                                                 | 16.285446  | - | - | - | 38.7121  | 292.082296 |
| NEG06914 | 988727.2041 | 1180504.485 | 0.255759 | 0.314606 | 0.7189 | 0.29735 | Diethylphosphoric acid                                                                                             | -14.39965  | - | - | - | 38.71055 | 153.092004 |
| NEG06923 | 3338057.776 | 3310379.182 | -0.01201 | 0.925934 | 0.9755 | 0.00944 | Fusarenone X                                                                                                       | -6.7511817 | - | - | - | 38.69945 | 353.342131 |
| NEG06924 | 164882.8125 | 117582.3398 | -0.48777 | 0.098181 | 0.5586 | 0.25848 | 2,4,5-trihydroxy-6-(1-(4-methoxy-1-benzofuran-5-ylidene)-2-hydroxyethyl)-2,3-dihydro-1,4-dioxin-3-one              | 19.731563  | - | - | - | 38.67165 | 409.33182  |
| NEG06926 | 1225005.297 | 1388510.533 | 0.18075  | 0.868849 | 0.9556 | 0.04429 | Wedelolactone                                                                                                      | -2.4179017 | - | - | - | 38.64    | 313.238364 |
| NEG06928 | 137573.4213 | 228883.3928 | 0.734411 | 0.246321 | 0.6842 | 0.34283 | N-(6-oxo-6H-dibenzo[b,d]pyran-3-yl)maleamic acid                                                                   | 5.9707318  | - | - | - | 38.6237  | 308.26747  |
| NEG06930 | 18875109.22 | 27139209.24 | 0.523894 | 0.587449 | 0.8421 | 2.61585 | Benzoyl meso-tartaric acid                                                                                         | -19.796407 | - | - | - | 38.6102  | 253.180591 |

|          |             |             |          |          |        |         |                                                                                                                                        |            |   |   |   |          |            |
|----------|-------------|-------------|----------|----------|--------|---------|----------------------------------------------------------------------------------------------------------------------------------------|------------|---|---|---|----------|------------|
| NEG06932 | 877218.5882 | 1110369.916 | 0.340032 | 0.11204  | 0.5703 | 0.51874 | Phenolic phosphate                                                                                                                     | -11.513015 | - | - | - | 38.57275 | 173.081819 |
| NEG06933 | 3262718.34  | 3397366.802 | 0.058343 | 0.855916 | 0.9527 | 0.28849 | (1S,3R)-5-(2,2-dichloroethenyl)-2,2-dimethylsuccinonitrile                                                                             | -5.1790919 | - | - | - | 38.5671  | 208.061441 |
| NEG06937 | 3660635.358 | 3774680.363 | 0.04426  | 0.724734 | 0.9063 | 0.12275 | Phosphoenolpyruvate                                                                                                                    | 0.2669894  | - | - | - | 38.53085 | 167.034768 |
| NEG06943 | 78300.33932 | 165189.9104 | 1.077035 | 0.383932 | 0.7477 | 0.26749 | UDP                                                                                                                                    | -23.56302  | - | - | - | 38.5074  | 403.1444   |
| NEG06949 | 179511.5073 | 150863.4903 | -0.25083 | 0.490322 | 0.7998 | 0.09064 | Azimsulfuron                                                                                                                           | -9.2165748 | - | - | - | 38.4687  | 423.383912 |
| NEG06952 | 366136.1753 | 344725.8336 | -0.08693 | 0.573213 | 0.8369 | 0.08046 | Stipitate                                                                                                                              | 2.5859539  | - | - | - | 38.4662  | 181.123394 |
| NEG06955 | 292552.7945 | 371178.7502 | 0.343417 | 0.139041 | 0.6058 | 0.29853 | N-debutylhalofantrine                                                                                                                  | 14.074485  | - | - | - | 38.4572  | 443.315977 |
| NEG06962 | 441216.8957 | 387238.1323 | -0.18827 | 0.230421 | 0.6743 | 0.20887 | (4-{(1S,2S)-methoxy-4-(sulfooxy)phenyl}-6,11-{2,6-dihydroxy-2,8-(1E)-2-(4-hydroxyphenyl)ethanylethyl}N-(3,5-dichlorophenyl)succinimide | 20.673926  | - | - | - | 38.4153  | 526.483628 |
| NEG06966 | 715467.4306 | 763225.8271 | 0.093224 | 0.700274 | 0.8985 | 0.1449  | (4-hydroxyphenyl)ethanylethyl                                                                                                          | 7.2506683  | - | - | - | 38.3948  | 323.295075 |
| NEG06970 | 428739.9923 | 383442.3674 | -0.16109 | 0.396892 | 0.7532 | 0.17214 | Dichlorophenyl)succinimide                                                                                                             | -2.2165996 | - | - | - | 38.3934  | 243.066282 |
| NEG06976 | 164426.7613 | 269522.1924 | 0.712959 | 0.400407 | 0.7562 | 0.19955 | 3-Epihydroxymugineic acid                                                                                                              | 21.143714  | - | - | - | 38.3788  | 335.295034 |
| NEG06977 | 429493.6564 | 210195.0232 | -1.03091 | 0.384973 | 0.7478 | 0.51187 | 4-nitrophenolate                                                                                                                       | 10.132248  | - | - | - | 38.35865 | 137.097123 |
| NEG06978 | 629184.175  | 557437.8893 | -0.17467 | 0.316062 | 0.7189 | 0.1967  | (R)-5-Phosphomevalote                                                                                                                  | -3.5542177 | - | - | - | 38.3419  | 227.128913 |
| NEG06980 | 573747.5237 | 331682.8264 | -0.79061 | 0.410612 | 0.761  | 0.50921 | EDTA                                                                                                                                   | -9.7137093 | - | - | - | 38.33655 | 291.232485 |
| NEG06986 | 1490752.35  | 1285164.067 | -0.21409 | 0.837973 | 0.9468 | 0.10551 | D-myo-Inositol 1,2-cyclic phosphate                                                                                                    | -20.214626 | - | - | - | 38.304   | 241.108329 |
| NEG07004 | 107863.7784 | 109025.926  | 0.015461 | 0.96809  | 0.9907 | 0.01477 | {11-(5-methoxyphenyl)-2-(2,4,6-trihydroxyphenyl)pyran-2-Carboxy-2-hydroxy-8-carboxychromene                                            | 3.860041   | - | - | - | 38.20405 | 369.364153 |
| NEG07006 | 1398068.222 | 648902.2744 | -1.10736 | 0.05589  | 0.4884 | 0.97683 | 2-Carboxy-2-hydroxy-8-carboxychromene                                                                                                  | -0.2870146 | - | - | - | 38.1907  | 235.170256 |
| NEG07008 | 880832.4078 | 559634.0909 | -0.65438 | 0.008817 | 0.2551 | 0.78261 | Purine mononucleotide                                                                                                                  | -24.689642 | - | - | - | 38.18805 | 331.191121 |
| NEG07012 | 1684465.004 | 1679037.557 | -0.00466 | 0.983575 | 0.9956 | 0.02297 | 4-Maleylacetoacetate                                                                                                                   | -21.685783 | - | - | - | 38.1625  | 199.133883 |
| NEG07017 | 290263.0768 | 235745.8445 | -0.30013 | 0.209367 | 0.6619 | 0.22503 | Epigallocatechin 3-gallate                                                                                                             | 9.5534686  | - | - | - | 38.1495  | 457.368802 |
| NEG07021 | 637407.8253 | 585262.9993 | -0.12313 | 0.789341 | 0.9279 | 0.16595 | D-Ribose 5-phosphate                                                                                                                   | 22.156356  | - | - | - | 38.1392  | 229.107622 |
| NEG07022 | 1338588.544 | 1396972.571 | 0.061591 | 0.819007 | 0.9375 | 0.10804 | Chlorthiamid                                                                                                                           | 8.5365251  | - | - | - | 38.1385  | 205.086783 |
| NEG07023 | 604381.7434 | 542333.1854 | -0.15628 | 0.439017 | 0.7739 | 0.2604  | (-)-Epicatechin 3-O-gallate                                                                                                            | 10.315659  | - | - | - | 38.13655 | 441.373287 |

|          |             |             |          |          |        |         |                                                                                                                                         |            |   |   |   |          |            |
|----------|-------------|-------------|----------|----------|--------|---------|-----------------------------------------------------------------------------------------------------------------------------------------|------------|---|---|---|----------|------------|
| NEG07024 | 330686.8701 | 248310.1096 | -0.41332 | 0.32635  | 0.7206 | 0.20348 | 3-(2,0-Dichlorobenzylidene)aminolactone                                                                                                 | 18.145836  | - | - | - | 38.1306  | 367.212205 |
| NEG07027 | 746514.2704 | 219439.8677 | -1.76634 | 0.006035 | 0.2182 | 0.99857 | Ellagic acid                                                                                                                            | -15.632297 | - | - | - | 38.1064  | 301.180599 |
| NEG07030 | 189307.6115 | 165419.7361 | -0.1946  | 0.47674  | 0.7932 | 0.11554 | Celecoxib glucuronide                                                                                                                   | -15.868763 | - | - | - | 38.0944  | 558.452845 |
| NEG07031 | 690791.047  | 563221.1645 | -0.29455 | 0.166834 | 0.6281 | 0.3797  | [5-(Aminomethyl)furan-3-yl]methyl phosphate                                                                                             | 22.173633  | - | - | - | 38.0863  | 206.118416 |
| NEG07034 | 105029.7873 | 108007.8189 | 0.040337 | 0.889858 | 0.9633 | 0.04083 | 2- <small>O</small> - <small>alpha</small> - <small>D</small> -Galactopyranosyl-1- <small>beta</small> - <small>D</small> -xylofuranose | -19.856696 | - | - | - | 38.07865 | 324.298564 |
| NEG07035 | 1994473.659 | 1889058.961 | -0.07834 | 0.573477 | 0.8369 | 0.29063 | Zwittermicin A                                                                                                                          | -1.6199238 | - | - | - | 38.0782  | 395.388881 |
| NEG07039 | 244947.878  | 216312.5371 | -0.17936 | 0.527687 | 0.8181 | 0.118   | Aurasperone D                                                                                                                           | 16.808066  | - | - | - | 38.07185 | 555.518377 |
| NEG07040 | 470716.0622 | 406003.2131 | -0.21337 | 0.648902 | 0.8721 | 0.11415 | Savinin                                                                                                                                 | -10.520774 | - | - | - | 38.07075 | 351.326417 |
| NEG07043 | 405835.973  | 870938.9796 | 1.101675 | 0.015854 | 0.3144 | 0.79657 | Tazobactam                                                                                                                              | 7.7430881  | - | - | - | 38.0659  | 299.286149 |
| NEG07044 | 937599.4349 | 1305502.173 | 0.477561 | 0.247062 | 0.6846 | 0.64642 | Glycerone phosphate                                                                                                                     | 0.8808707  | - | - | - | 38.0659  | 169.050673 |
| NEG07045 | 1205400.607 | 1629769.909 | 0.435156 | 0.458239 | 0.7822 | 0.32342 | Methylmercury chloride                                                                                                                  | 6.9287373  | - | - | - | 38.0659  | 250.071963 |
| NEG07048 | 84487.59302 | 80259.83373 | -0.07406 | 0.762377 | 0.9199 | 0.0155  | 3,4,5-trihydroxy-3-(3,4,5-trihydroxyphenyl)-5-hydroxy-7-methoxy-2H-benzofuran                                                           | 1.489605   | - | - | - | 38.0633  | 489.322454 |
| NEG07055 | 1159311.343 | 1345868.912 | 0.21527  | 0.790832 | 0.928  | 0.28853 | 5,6,7-trihydroxy-5-(hydroxymethyl)-7-(3,4,5-trihydroxyphenyl)-2H-benzofuran                                                             | -15.657625 | - | - | - | 38.0045  | 415.321205 |
| NEG07063 | 57009.53428 | 52892.98656 | -0.10813 | 0.792003 | 0.9284 | 0.04426 | (hydroxymethyl)-7-(3,4,5-trihydroxyphenyl)-2H-benzofuran                                                                                | -15.73848  | - | - | - | 37.94995 | 356.2801   |
| NEG07067 | 347218.2817 | 174680.9017 | -0.99112 | 0.002365 | 0.1309 | 0.56056 | Quinclorac                                                                                                                              | -2.0680014 | - | - | - | 37.9355  | 241.050423 |
| NEG07071 | 153614.755  | 86364.92727 | -0.8308  | 0.017015 | 0.3231 | 0.28678 | 2,3,7,8-Tetrachlorodibenzodioxin                                                                                                        | -0.8700496 | - | - | - | 37.9276  | 320.963443 |
| NEG07076 | 108473.0154 | 213222.7698 | 0.975025 | 0.01707  | 0.3231 | 0.38133 | Graticin                                                                                                                                | 18.346264  | - | - | - | 37.8978  | 443.389076 |
| NEG07077 | 130009.2749 | 194721.4556 | 0.582797 | 0.083019 | 0.5411 | 0.24988 | Morfamquat                                                                                                                              | -6.3332163 | - | - | - | 37.88795 | 538.483707 |
| NEG07079 | 354411.9535 | 345858.7389 | -0.03524 | 0.858051 | 0.9533 | 0.03124 | D-Lombricine                                                                                                                            | 9.5511488  | - | - | - | 37.8742  | 269.175604 |
| NEG07091 | 605438.1378 | 406867.6722 | -0.57342 | 0.255117 | 0.6872 | 0.41962 | Lamotrigine                                                                                                                             | 13.968472  | - | - | - | 37.8309  | 255.087301 |
| NEG07095 | 373518.5912 | 314161.7828 | -0.24967 | 0.012791 | 0.2932 | 0.29588 | Brimonidine                                                                                                                             | -12.494119 | - | - | - | 37.79655 | 291.123673 |
| NEG07096 | 619994.1456 | 346919.6443 | -0.83765 | 0.006822 | 0.2329 | 0.73532 | 2-( <small>alpha</small> - <small>D</small> -Mannosyl)-3-phosphoglycerate                                                               | -12.254704 | - | - | - | 37.79605 | 347.186256 |
| NEG07110 | 96334.29662 | 213092.0168 | 1.145355 | 0.440935 | 0.7749 | 0.21071 | 3-(3,4,5-trihydroxyphenyl)-1- <small>O</small> - <small>beta</small> - <small>D</small> -xylofuranose                                   | -5.3921943 | - | - | - | 37.7377  | 349.310834 |

|          |             |             |          |          |        |         |                                                                                          |            |   |   |   |          |            |
|----------|-------------|-------------|----------|----------|--------|---------|------------------------------------------------------------------------------------------|------------|---|---|---|----------|------------|
| NEG07111 | 469059.135  | 340277.6853 | -0.46306 | 0.050717 | 0.4758 | 0.42911 | 3,5-Dinitro-4-hydroxyphenylpyruvate                                                      | -24.123555 | - | - | - | 37.7262  | 269.138706 |
| NEG07114 | 337641.6793 | 310008.4236 | -0.12319 | 0.591736 | 0.8437 | 0.0835  | Decucoside III                                                                           | 2.275189   | - | - | - | 37.69815 | 569.533821 |
| NEG07115 | 1175344.794 | 899875.3856 | -0.38529 | 0.459397 | 0.7829 | 0.32576 | 3,5-Dichloro-L-tyrosine                                                                  | 21.051467  | - | - | - | 37.68965 | 249.076688 |
| NEG07127 | 594934.9943 | 529485.7864 | -0.16814 | 0.375706 | 0.7438 | 0.25549 | Isopentenyl diphosphate                                                                  | -13.456007 | - | - | - | 37.6338  | 245.081512 |
| NEG07134 | 314475.5666 | 199575.6984 | -0.65601 | 0.23613  | 0.6796 | 0.37341 | 3'-Sialyllactose                                                                         | -21.19277  | - | - | - | 37.60455 | 632.530397 |
| NEG07135 | 472500.7669 | 309079.2571 | -0.61234 | 0.037275 | 0.4235 | 0.53147 | 6-Phospho-D-glucote                                                                      | 2.1401234  | - | - | - | 37.6037  | 275.128514 |
| NEG07138 | 494435.5096 | 334516.6069 | -0.5637  | 0.037227 | 0.4235 | 0.53297 | 6-Phospho-2-dehydro-D-glucote                                                            | 4.5482474  | - | - | - | 37.57805 | 273.11327  |
| NEG07141 | 674069.9894 | 657514.5647 | -0.03588 | 0.869391 | 0.956  | 0.03816 | 4,4'-bis(4-hydroxyphenyl) ether                                                          | -13.372393 | - | - | - | 37.54755 | 642.567717 |
| NEG07143 | 243246.1294 | 538814.9933 | 1.147373 | 0.150045 | 0.6145 | 0.58924 | Digallate                                                                                | 9.5051516  | - | - | - | 37.5457  | 321.219586 |
| NEG07147 | 982367.6919 | 700746.598  | -0.48737 | 0.258372 | 0.6898 | 0.58367 | beta-D-4-Deoxy-alpha-D-GlcA-(1->4)-beta-D-GlcA (1->4) alpha-D-GlcA                       | 4.2839201  | - | - | - | 37.535   | 645.541993 |
| NEG07150 | 555201.6648 | 422851.5776 | -0.39286 | 0.292824 | 0.7099 | 0.39093 | Prebetanin                                                                               | -21.271286 | - | - | - | 37.517   | 629.511311 |
| NEG07151 | 148337.2218 | 311516.1801 | 1.070426 | 0.308146 | 0.7158 | 0.36656 | Bicuculline                                                                              | 2.0264809  | - | - | - | 37.5166  | 366.345568 |
| NEG07153 | 212732.307  | 219325.4172 | 0.044034 | 0.859712 | 0.9535 | 0.02832 | Pteroyltriglutamic acid                                                                  | 16.511755  | - | - | - | 37.5071  | 698.629675 |
| NEG07156 | 276141.3094 | 173266.7301 | -0.67241 | 0.153314 | 0.6159 | 0.37378 | Heme                                                                                     | 24.591808  | - | - | - | 37.50245 | 615.495184 |
| NEG07160 | 320402.2634 | 279090.8647 | -0.19915 | 0.648889 | 0.8721 | 0.12419 | 5-(methylsulfanyl)-2,3-dioxopentyl Phosphate(2-)                                         | 9.0203861  | - | - | - | 37.4937  | 239.16489  |
| NEG07161 | 297614.1021 | 223917.9902 | -0.41047 | 0.035162 | 0.4158 | 0.33748 | Isoimide                                                                                 | -24.419547 | - | - | - | 37.4937  | 305.139847 |
| NEG07164 | 334824.7785 | 398785.6179 | 0.252207 | 0.437462 | 0.7726 | 0.19717 | 5-(N-Hydroxy-N-methylcarbamoyl)glutathione                                               | -23.952921 | - | - | - | 37.4899  | 379.357812 |
| NEG07166 | 219505.275  | 261454.4584 | 0.252304 | 0.326035 | 0.7202 | 0.18    | Petunidin 3-gentiobioside                                                                | 12.334487  | - | - | - | 37.48385 | 640.552037 |
| NEG07167 | 1320158.455 | 273073.4362 | -2.27335 | 0.023729 | 0.3593 | 1.29761 | 3',5'-Cyclic IMP                                                                         | -23.12891  | - | - | - | 37.4744  | 329.175786 |
| NEG07169 | 843657.0692 | 529418.1029 | -0.67225 | 0.268141 | 0.6952 | 0.51195 | Acetyl phosphate                                                                         | -11.341221 | - | - | - | 37.4677  | 139.023035 |
| NEG07171 | 564846.8022 | 379545.7248 | -0.57359 | 0.19448  | 0.6521 | 0.48662 | 3,4,5-trihydroxy-6-(2-hydroxy-5-(3,5,6,7-tetrahydro-2H-1,4-dioxin-2-yl)ethyl)hexan-2-one | -1.5068762 | - | - | - | 37.447   | 643.526752 |
| NEG07175 | 229244.3065 | 160866.457  | -0.51102 | 0.322936 | 0.7192 | 0.26682 | Aldotetrauronic acid                                                                     | -10.014627 | - | - | - | 37.4437  | 603.496469 |
| NEG07176 | 89865.85426 | 62274.19036 | -0.52914 | 0.203565 | 0.6615 | 0.16344 | N-Glycoloyl-neuramite                                                                    | -15.666435 | - | - | - | 37.4421  | 324.256928 |

|          |             |             |          |          |        |         |                                                                                                        |            |   |   |   |          |            |
|----------|-------------|-------------|----------|----------|--------|---------|--------------------------------------------------------------------------------------------------------|------------|---|---|---|----------|------------|
| NEG07178 | 2600285.883 | 15305188.88 | 2.557279 | 0.000952 | 0.0947 | 5.05582 | Bis(4-nitrophenyl)phosphate                                                                            | 18.703959  | - | - | - | 37.43795 | 339.181286 |
| NEG07179 | 558313.9973 | 383681.2265 | -0.54117 | 0.061648 | 0.5018 | 0.44899 | (2R)-O-Phospho-3-sulfolactate                                                                          | -3.1599389 | - | - | - | 37.4376  | 249.112933 |
| NEG07185 | 2390338.297 | 2367612.472 | -0.01378 | 0.929741 | 0.9763 | 0.01893 | [2-(2-hydroxy-3,4-dihydro-2H-1-benzoxan-2-ylideneoxy)phenyl]-O-(6-O-galloyl-beta-D-glucopyranoside)    | 1.593486   | - | - | - | 37.3713  | 381.373333 |
| NEG07189 | 562343.8133 | 504341.2044 | -0.15705 | 0.517761 | 0.8122 | 0.25241 | Chloranocryl                                                                                           | 14.918837  | - | - | - | 37.3573  | 229.086756 |
| NEG07193 | 760809.1453 | 547346.5932 | -0.47508 | 0.107078 | 0.5681 | 0.49666 | Pyridoxamine phosphate                                                                                 | 17.881929  | - | - | - | 37.3489  | 247.170161 |
| NEG07194 | 53695.89923 | 49827.36453 | -0.10787 | 0.783988 | 0.9268 | 0.02206 | Cefuroxime axetil                                                                                      | -20.130449 | - | - | - | 37.3489  | 509.456947 |
| NEG07196 | 424349.3929 | 363141.5975 | -0.22472 | 0.299386 | 0.7148 | 0.21624 | Pelargonidin 3-O-rutinoside                                                                            | -7.4109799 | - | - | - | 37.33335 | 578.515029 |
| NEG07198 | 455933.2271 | 346149.9115 | -0.39743 | 0.44525  | 0.7774 | 0.32904 | D-Erythritol 4-phosphate                                                                               | -1.6743189 | - | - | - | 37.32925 | 201.092085 |
| NEG07204 | 590889.6149 | 621701.9088 | 0.073334 | 0.661743 | 0.8779 | 0.09668 | Niazimin A                                                                                             | -23.336609 | - | - | - | 37.30825 | 382.376776 |
| NEG07205 | 202387.0659 | 131617.9585 | -0.62076 | 0.222824 | 0.6692 | 0.30293 | Myricetin 3,3'-digalactoside                                                                           | 3.457135   | - | - | - | 37.30065 | 641.511245 |
| NEG07208 | 190751.1657 | 547772.8276 | 1.521886 | 0.003385 | 0.1597 | 0.8003  | Streptidine 6-phosphate                                                                                | 14.694342  | - | - | - | 37.28585 | 341.243952 |
| NEG07209 | 166054.4714 | 95530.57678 | -0.79762 | 0.209109 | 0.6619 | 0.32502 | (6-O-galloyl-beta-D-glucopyranoside)                                                                   | 22.596941  | - | - | - | 37.2841  | 439.357574 |
| NEG07211 | 169156.6172 | 1047335.854 | 2.630293 | 0.141016 | 0.6076 | 0.96805 | Chlormethoxyfen                                                                                        | -16.518853 | - | - | - | 37.2823  | 313.108434 |
| NEG07214 | 76464.38773 | 154670.5283 | 1.016338 | 0.39936  | 0.7555 | 0.19091 | 2-(4-benzoyl-5,5-dihydroxyphenoxy)-6-(hydroxymethyl)oxane                                              | 13.343759  | - | - | - | 37.2805  | 391.357959 |
| NEG07216 | 372453.4347 | 393147.1544 | 0.078009 | 0.732277 | 0.9091 | 0.10142 | Justicidin A                                                                                           | 16.726875  | - | - | - | 37.2397  | 393.37342  |
| NEG07218 | 112436.5193 | 102391.0018 | -0.13502 | 0.621589 | 0.8589 | 0.05512 | Lippioside II                                                                                          | 22.33004   | - | - | - | 37.2202  | 553.502405 |
| NEG07220 | 106197.74   | 80890.54218 | -0.39271 | 0.515825 | 0.8114 | 0.09192 | Lamivudine-monophosphate                                                                               | -19.172898 | - | - | - | 37.1953  | 308.222794 |
| NEG07224 | 39679.78481 | 93403.84293 | 1.235078 | 0.424636 | 0.7672 | 0.14716 | Ipolamiide                                                                                             | -2.208059  | - | - | - | 37.18775 | 405.373526 |
| NEG07229 | 814336.9569 | 776666.5559 | -0.06833 | 0.737006 | 0.9117 | 0.1079  | 5'-Hydroxystreptomycin                                                                                 | -6.8173589 | - | - | - | 37.1858  | 596.56215  |
| NEG07232 | 136817.8593 | 147077.6373 | 0.104321 | 0.676464 | 0.8854 | 0.0606  | Pelargonidin 3-O-beta-D-sambubioside                                                                   | 11.27512   | - | - | - | 37.1686  | 564.499199 |
| NEG07237 | 605665.1073 | 584713.4932 | -0.05079 | 0.832795 | 0.9447 | 0.13963 | 3-Phospho-D-erythrose                                                                                  | -21.418448 | - | - | - | 37.16585 | 215.071295 |
| NEG07244 | 542701.1549 | 391064.2755 | -0.47275 | 0.32784  | 0.721  | 0.42309 | (2-[(2-[(2,4-dihydroxyphenyl)-4-oxo-4H-chromen-2-yl]oxy)phenyl]-O-(6-O-galloyl-beta-D-glucopyranoside) | 23.111536  | - | - | - | 37.1501  | 659.55799  |
| NEG07246 | 37096.3757  | 49238.41254 | 0.408506 | 0.510631 | 0.8083 | 0.08088 | Celecoxib                                                                                              | -9.4346944 | - | - | - | 37.1449  | 380.361325 |



|          |             |             |          |          |        |         |                                                                         |            |   |   |   |          |            |
|----------|-------------|-------------|----------|----------|--------|---------|-------------------------------------------------------------------------|------------|---|---|---|----------|------------|
| NEG07247 | 142219.7443 | 117198.5724 | -0.27917 | 0.480547 | 0.7955 | 0.1455  | Isosorbide dinitrate                                                    | -22.570973 | - | - | - | 37.13115 | 235.123694 |
| NEG07252 | 83802.41631 | 71377.43842 | -0.23152 | 0.470612 | 0.7902 | 0.06891 | 11-[(6-carboxy-3,4,5-trihydroxyoxan-2-yl)oxy]-                          | 3.6035582  | - | - | - | 37.1007  | 638.536028 |
| NEG07256 | 493981.0164 | 475725.0137 | -0.05433 | 0.820893 | 0.9386 | 0.06074 | 2-(6-{[5,7-dihydroxy-2-(4-oxocyclohexa-2,5-dien-1-ylidene)-2H-chroman-3 | 17.249372  | - | - | - | 37.0895  | 608.562238 |
| NEG07265 | 168628.5665 | 182565.3085 | 0.114564 | 0.727628 | 0.9075 | 0.05614 | Aplysiatoxin                                                            | -10.777587 | - | - | - | 37.02265 | 670.599085 |
| NEG07270 | 295679.3288 | 167255.7249 | -0.82198 | 0.008067 | 0.25   | 0.47419 | M1                                                                      | 16.27569   | - | - | - | 36.98735 | 303.123673 |
| NEG07275 | 141587.6205 | 124042.7301 | -0.19086 | 0.618797 | 0.8572 | 0.07167 | Flupyr sulfuron-methyl sodium                                           | -2.2286738 | - | - | - | 36.9654  | 487.342535 |
| NEG07276 | 90116.98067 | 103839.115  | 0.204479 | 0.562036 | 0.8325 | 0.07293 | ringin                                                                  | -15.693318 | - | - | - | 36.9654  | 579.518213 |
| NEG07280 | 302897.6101 | 208349.1244 | -0.53983 | 0.373635 | 0.7428 | 0.32324 | (10-[2,7-dimethoxy-2-(3-hydroxyphenyl)-4-oxo-3-                         | 0.3314735  | - | - | - | 36.9622  | 673.572947 |
| NEG07284 | 193756.5232 | 190075.6639 | -0.02767 | 0.950522 | 0.9834 | 0.0514  | Caloxetate trisodium                                                    | -11.189474 | - | - | - | 36.95795 | 630.514857 |
| NEG07285 | 212628.0991 | 209513.0212 | -0.02129 | 0.925852 | 0.9755 | 0.00389 | Malvin                                                                  | -4.1359822 | - | - | - | 36.95795 | 654.568012 |
| NEG07288 | 533757.751  | 334276.8882 | -0.67514 | 0.365514 | 0.7399 | 0.39202 | 2-Oxo-3-hydroxy-4-phosphobutanoate                                      | -20.787751 | - | - | - | 36.95115 | 213.055573 |
| NEG07289 | 185387.3342 | 118048.7485 | -0.65116 | 0.230387 | 0.6743 | 0.30136 | 3'-&apos;-Adenylylspectinomycin                                         | 20.212195  | - | - | - | 36.95115 | 660.561595 |
| NEG07295 | 2705062.103 | 2234901.061 | -0.27545 | 0.002344 | 0.1309 | 0.97696 | Arsenobetaine                                                           | 9.7247124  | - | - | - | 36.9343  | 177.055655 |
| NEG07296 | 220067.1499 | 139492.4086 | -0.65776 | 0.213037 | 0.6634 | 0.32167 | Patuletin 3-gentiobioside                                               | -12.685554 | - | - | - | 36.90965 | 655.527295 |
| NEG07298 | 132636.3402 | 140125.8897 | 0.079247 | 0.743364 | 0.9124 | 0.06106 | Phosacetim                                                              | -7.7973804 | - | - | - | 36.8958  | 374.199798 |
| NEG07302 | 179624.2096 | 113124.5071 | -0.66707 | 0.125475 | 0.5916 | 0.32708 | 1-alkyl-2-acylglycerophosphoethano                                      | 13.849831  | - | - | - | 36.8589  | 242.148091 |
| NEG07304 | 349451.8082 | 136516.5745 | -1.35602 | 0.006564 | 0.2295 | 0.64545 | D-Glucono-1,5-lactone 6-phosphate                                       | 22.350978  | - | - | - | 36.8589  | 257.118393 |
| NEG07306 | 41837.41661 | 87645.26143 | 1.066882 | 0.369791 | 0.7408 | 0.14748 | [1-(2H-1,5-benzodioxol-5-yl)-3-(4-methoxy-1-                            | 15.871299  | - | - | - | 36.8579  | 419.389396 |
| NEG07310 | 74695.83558 | 92085.11485 | 0.30194  | 0.53754  | 0.8243 | 0.10441 | (3,5-dimethoxy-2-(3-hydroxy-7-methoxy-4-                                | -2.4636097 | - | - | - | 36.85105 | 671.601066 |
| NEG07313 | 132986.9585 | 137849.8537 | 0.051813 | 0.835893 | 0.9465 | 0.02024 | Neohesperidin dihydrochalcone                                           | 18.972993  | - | - | - | 36.8438  | 611.580746 |
| NEG07317 | 43475.83848 | 57171.38857 | 0.395079 | 0.450416 | 0.7801 | 0.08833 | Tribenuron methyl                                                       | -15.874784 | - | - | - | 36.8419  | 394.376847 |
| NEG07319 | 300321.0375 | 283212.5309 | -0.08462 | 0.742012 | 0.9121 | 0.05031 | Apigenin 7-(6'-&apos;-                                                  | -12.206268 | - | - | - | 36.8419  | 517.410095 |
| NEG07322 | 2013932.786 | 1034493.321 | -0.96109 | 0.155557 | 0.6182 | 1.13634 | 3,4,5-trihydroxy-6-(2-hydroxyacetyl)oxy]oxane-2-carboxylic acid         | -10.714893 | - | - | - | 36.8365  | 251.165021 |

|          |             |             |          |          |        |         |                                                                                              |            |   |   |   |          |            |
|----------|-------------|-------------|----------|----------|--------|---------|----------------------------------------------------------------------------------------------|------------|---|---|---|----------|------------|
| NEG07326 | 215572.9949 | 141015.7653 | -0.61232 | 0.331663 | 0.7236 | 0.29606 | (1,3,4,5-tetrahydroxy-6-(3-hydroxyphenyl)-7-hydroxy-2-(4-hydroxyphenyl)-3,4,5-trimethoxy-13- | -20.283115 | - | - | - | 36.8261  | 687.588756 |
| NEG07327 | 68931.50922 | 55191.48225 | -0.32072 | 0.199463 | 0.6571 | 0.11876 | ((11,17,18-trimethoxy-13-                                                                    | -0.7379098 | - | - | - | 36.8258  | 559.45631  |
| NEG07329 | 225195.6943 | 144934.9238 | -0.63577 | 0.282451 | 0.7021 | 0.32171 | [(acetyloxy)methyl]-4,5-dihydroxy-2-(1,5-dihydroxy                                           | -13.416096 | - | - | - | 36.8258  | 685.573512 |
| NEG07330 | 175549.3203 | 151569.0671 | -0.2119  | 0.421801 | 0.7663 | 0.11504 | Hesperidin                                                                                   | 19.075341  | - | - | - | 36.8255  | 609.56497  |
| NEG07331 | 634426.3571 | 654126.6067 | 0.044117 | 0.96123  | 0.9883 | 0.03461 | beta-1-nor-alpha-phenylbenzeneethamine hydrochloride                                         | 4.2421639  | - | - | - | 36.82495 | 267.175461 |
| NEG07336 | 235514.5502 | 207136.9405 | -0.18523 | 0.516411 | 0.8117 | 0.08948 | Diosmin                                                                                      | 19.97849   | - | - | - | 36.8238  | 607.549581 |
| NEG07341 | 342489.3661 | 289621.7228 | -0.24189 | 0.374144 | 0.7431 | 0.13823 | SN38 glucuronide                                                                             | -6.7045276 | - | - | - | 36.8028  | 567.517612 |
| NEG07343 | 155444.1581 | 164523.3638 | 0.081896 | 0.839531 | 0.9472 | 0.02611 | 3,5-Dinitrosalicylic acid                                                                    | -4.3899931 | - | - | - | 36.7897  | 227.107622 |
| NEG07344 | 428053.9345 | 444841.7021 | 0.055499 | 0.953332 | 0.9849 | 0.13253 | 5,4,5-trimethoxy-6-(1-methoxy-4-oxo-2-phenyl-8,13,15-trihydroxy-6-                           | 12.078429  | - | - | - | 36.7861  | 605.533049 |
| NEG07345 | 86238.27567 | 88833.60484 | 0.042777 | 0.811537 | 0.9348 | 0.01229 | Kuwanon L                                                                                    | -3.8588553 | - | - | - | 36.7861  | 625.596405 |
| NEG07347 | 267328.4864 | 241635.2258 | -0.14578 | 0.431801 | 0.77   | 0.11896 | Uracil                                                                                       | 17.546114  | - | - | - | 36.7748  | 111.08149  |
| NEG07350 | 308511.9596 | 220895.3946 | -0.48196 | 0.045028 | 0.45   | 0.36542 | 6-(1,3,5-trimethoxy-2-(3-hydroxyphenyl)-4-oxo-4-                                             | -11.333559 | - | - | - | 36.7603  | 643.567418 |
| NEG07351 | 886038.1839 | 899893.6267 | 0.022386 | 0.933341 | 0.9777 | 0.0229  | Benzethonium chloride                                                                        | -22.273066 | - | - | - | 36.7533  | 447.063643 |
| NEG07353 | 235517.2123 | 435966.8765 | 0.888386 | 0.349402 | 0.7322 | 0.46507 | 1-Carboxyvinyl carboxyphosphate                                                              | 1.1611374  | - | - | - | 36.7345  | 195.045051 |
| NEG07354 | 62454.01656 | 39965.25997 | -0.64405 | 0.143508 | 0.6122 | 0.16923 | 3-Methylglucic acid 2-(4-galactosylglucoside)                                                | -13.534594 | - | - | - | 36.7345  | 653.510865 |
| NEG07361 | 127023.7995 | 130500.3121 | 0.038954 | 0.899764 | 0.9672 | 0.01377 | rcobarbital                                                                                  | -4.622193  | - | - | - | 36.6962  | 302.143722 |
| NEG07362 | 99229.28209 | 197633.8123 | 0.993992 | 0.396221 | 0.7528 | 0.19386 | Ritipenem acoxil hydrate                                                                     | -14.971783 | - | - | - | 36.6861  | 377.342059 |
| NEG07363 | 713585.1763 | 895008.387  | 0.326816 | 0.627076 | 0.8608 | 0.3769  | alpha-1,5-L-Arabinotriose                                                                    | -15.079285 | - | - | - | 36.6828  | 413.345575 |
| NEG07365 | 96147.8323  | 97622.67499 | 0.021962 | 0.866523 | 0.9556 | 0.01474 | Hellicoside                                                                                  | -14.671612 | - | - | - | 36.6814  | 655.56899  |
| NEG07366 | 150660.2331 | 94113.2692  | -0.67883 | 0.253249 | 0.6865 | 0.26855 | 6-(1,3,5-trimethoxy-2-(3-hydroxyphenyl)-4-oxo-2,4-dihydroxy-4-                               | -13.281703 | - | - | - | 36.6814  | 701.604391 |
| NEG07369 | 416896.4497 | 457936.3795 | 0.135458 | 0.708378 | 0.9015 | 0.14901 | Propyzamide                                                                                  | 13.440355  | - | - | - | 36.65995 | 255.123966 |
| NEG07370 | 70974.38883 | 72735.27817 | 0.035357 | 0.907191 | 0.9697 | 0.03494 | Pelargonidin 3-O-(6-O-malonyl-beta-D-glucoside)                                              | -20.402793 | - | - | - | 36.65425 | 518.413726 |
| NEG07376 | 120789.3178 | 94563.53286 | -0.35314 | 0.037234 | 0.4235 | 0.21014 | (2-(1,3,5-trimethoxy-4-oxo-2-phenyl-3-[3,4,5-trihydroxy-6-                                   | 18.010346  | - | - | - | 36.6321  | 657.584585 |

|          |             |             |          |          |        |         |                                                                                                                                  |            |   |   |   |          |            |
|----------|-------------|-------------|----------|----------|--------|---------|----------------------------------------------------------------------------------------------------------------------------------|------------|---|---|---|----------|------------|
| NEG07379 | 171204.8243 | 185877.7317 | 0.118631 | 0.765785 | 0.9213 | 0.04564 | Ginkgolide A                                                                                                                     | -7.2405252 | - | - | - | 36.6215  | 407.388966 |
| NEG07381 | 97962.24836 | 112688.5307 | 0.202043 | 0.402612 | 0.7574 | 0.10043 | Forsythiaside                                                                                                                    | 1.0306635  | - | - | - | 36.6215  | 623.580467 |
| NEG07384 | 169447.5333 | 183420.9496 | 0.11432  | 0.663258 | 0.8787 | 0.0687  | L-ascorbyl-2-pyruvate                                                                                                            | -1.3871114 | - | - | - | 36.621   | 620.561861 |
| NEG07391 | 63595.81607 | 65278.62074 | 0.037679 | 0.917756 | 0.9729 | 0.01807 | Tris(2,3-dibromopropyl) phosphate                                                                                                | 15.461737  | - | - | - | 36.6062  | 696.61431  |
| NEG07394 | 332599.2429 | 245506.8105 | -0.43802 | 0.006259 | 0.2196 | 0.38207 | D-Erythrose 4-phosphate                                                                                                          | -0.6393549 | - | - | - | 36.5788  | 199.076395 |
| NEG07398 | 502349.2916 | 505738.4877 | 0.009701 | 0.982354 | 0.9949 | 0.063   | L-Fucose 1-phosphate                                                                                                             | -22.337743 | - | - | - | 36.55255 | 243.12367  |
| NEG07399 | 122414.5792 | 74383.22655 | -0.71873 | 0.242637 | 0.6822 | 0.25004 | (S)-Skyrin 2-glucoside                                                                                                           | -3.381193  | - | - | - | 36.5361  | 699.588855 |
| NEG07405 | 61174.07977 | 50144.27329 | -0.28684 | 0.390318 | 0.751  | 0.07448 | 3-O-(1-O-((2S)-3-(4-oxo-2-oxopentylideneamino)acetyl)oxy)methyl-5-hydroxy-2-methyl-2H-pyridin-2-ylidene)-L-ascorbic acid         | 22.609685  | - | - | - | 36.5222  | 680.583134 |
| NEG07407 | 67181.19175 | 58174.50658 | -0.20767 | 0.462505 | 0.7842 | 0.08096 | 3,4,5-trihydroxyquercetin-7-O-galactosyl-(1->4)-glucoside                                                                        | -2.1787822 | - | - | - | 36.5083  | 639.534828 |
| NEG07410 | 512017.2057 | 481721.5441 | -0.08799 | 0.711155 | 0.9019 | 0.05662 | (1->2,3,4-trihydroxy-6-oxo-3-[3,4,5-trihydroxy-6-(hydroxymethyl)oxan-2-ylideneamino]-2-oxo-2H-pyridin-2-ylidene)-L-ascorbic acid | -2.0889521 | - | - | - | 36.5082  | 545.441582 |
| NEG07411 | 47300.28491 | 62976.09897 | 0.412956 | 0.428648 | 0.7691 | 0.0801  | Glucopyranuronosyl-D-mannose                                                                                                     | -23.766182 | - | - | - | 36.4987  | 355.264256 |
| NEG07415 | 83823.22454 | 79588.38566 | -0.07479 | 0.782057 | 0.9257 | 0.01132 | Aflatoxin B1 exo-8,9-epoxide-GSH                                                                                                 | -18.372082 | - | - | - | 36.4891  | 634.577546 |
| NEG07416 | 330457.1982 | 247597.4036 | -0.41647 | 0.229698 | 0.6734 | 0.23994 | 10-Acetoxytigustroside                                                                                                           | -18.822869 | - | - | - | 36.4861  | 581.532258 |
| NEG07418 | 406663.9715 | 407811.8042 | 0.004066 | 0.993041 | 0.9985 | 0.09456 | Endothal-disodium                                                                                                                | 20.341421  | - | - | - | 36.4831  | 229.123104 |
| NEG07419 | 296317.4743 | 261571.8162 | -0.17994 | 0.704927 | 0.8996 | 0.15543 | Oxapyrazon                                                                                                                       | 4.9149321  | - | - | - | 36.4831  | 337.107985 |
| NEG07420 | 63442.90473 | 51812.69326 | -0.29215 | 0.316739 | 0.7189 | 0.07076 | Orobanchoside                                                                                                                    | 1.1178878  | - | - | - | 36.4831  | 621.564719 |
| NEG07426 | 50515.19812 | 51736.16004 | 0.034455 | 0.905223 | 0.9695 | 0.01387 | Kanokoside C                                                                                                                     | -13.326652 | - | - | - | 36.4795  | 637.596413 |
| NEG07427 | 301040.3132 | 337814.3455 | 0.166274 | 0.861933 | 0.9541 | 0.05293 | Phosphoguanidinoacetate                                                                                                          | -12.789738 | - | - | - | 36.4787  | 196.076703 |
| NEG07431 | 271315.3915 | 206881.5382 | -0.39117 | 0.072333 | 0.5226 | 0.2765  | D-Mannitol 1-phosphate                                                                                                           | 19.802534  | - | - | - | 36.47745 | 261.149615 |
| NEG07434 | 82371.17063 | 138559.151  | 0.750291 | 0.432994 | 0.77   | 0.14463 | Bicalutamide                                                                                                                     | 16.699325  | - | - | - | 36.45445 | 429.37331  |
| NEG07437 | 66167.50123 | 67857.62943 | 0.036388 | 0.856751 | 0.9533 | 0.00603 | Cefoperazone sodium                                                                                                              | -2.9961049 | - | - | - | 36.451   | 666.639923 |
| NEG07444 | 279413.7033 | 190903.3469 | -0.54956 | 0.313529 | 0.7189 | 0.20818 | Erythrityl Tetranitrate                                                                                                          | 17.437843  | - | - | - | 36.4258  | 301.107992 |
| NEG07447 | 154619.0209 | 150605.7011 | -0.03794 | 0.863793 | 0.9547 | 0.00513 | (S)-2,3-Dihydro-5,6-dihydroxy-2-oxo-3-indoleacetic acid                                                                          | -19.820968 | - | - | - | 36.41225 | 546.445272 |

|          |             |             |          |          |        |         |                                                              |            |   |   |   |          |            |
|----------|-------------|-------------|----------|----------|--------|---------|--------------------------------------------------------------|------------|---|---|---|----------|------------|
| NEG07450 | 215470.1723 | 190422.0218 | -0.17829 | 0.539364 | 0.8256 | 0.10832 | Se-Adenosylselenomethionin                                   | -2.5182298 | - | - | - | 36.3987  | 445.331899 |
| NEG07452 | 685503.319  | 464018.3663 | -0.56298 | 0.678292 | 0.8861 | 0.12109 | Caffeoyl aspartic acid                                       | 20.5724    | - | - | - | 36.3906  | 294.243597 |
| NEG07456 | 263092.0703 | 229785.0414 | -0.19528 | 0.343603 | 0.73   | 0.18266 | Luteoskyrin                                                  | -16.503189 | - | - | - | 36.3751  | 573.471743 |
| NEG07457 | 1362449.929 | 1330459.29  | -0.03428 | 0.860183 | 0.9535 | 0.06263 | Halobetasol Propionate                                       | 10.471414  | - | - | - | 36.3716  | 483.957802 |
| NEG07462 | 347272.9589 | 318328.7138 | -0.12555 | 0.772054 | 0.9222 | 0.16199 | 2-epi-5-epi-Valiolone 7-phosphate                            | -19.622914 | - | - | - | 36.346   | 271.133883 |
| NEG07464 | 106218.0069 | 58770.7245  | -0.85386 | 0.024337 | 0.3595 | 0.28785 | Panfuran S                                                   | 0.4070962  | - | - | - | 36.3384  | 292.228343 |
| NEG07471 | 217057.224  | 194697.1341 | -0.15684 | 0.597533 | 0.8464 | 0.0791  | Ammeline                                                     | 24.372317  | - | - | - | 36.29    | 126.100521 |
| NEG07473 | 111594.0395 | 186584.5538 | 0.74157  | 0.512554 | 0.8101 | 0.1808  | trans-1,2-Dichloroethene                                     | -15.525365 | - | - | - | 36.2849  | 95.9345183 |
| NEG07480 | 506262.9866 | 300481.7753 | -0.75261 | 0.167897 | 0.6287 | 0.42523 | 2,4-DB                                                       | -12.414382 | - | - | - | 36.257   | 248.080231 |
| NEG07481 | 321355.5302 | 332562.9827 | 0.049457 | 0.841295 | 0.9478 | 0.03802 | Glucosinalbin                                                | 11.093695  | - | - | - | 36.257   | 423.420432 |
| NEG07483 | 112187.3841 | 66940.6352  | -0.74496 | 0.023206 | 0.3593 | 0.26921 | Limocitrin 3-rutinoside                                      | -20.820563 | - | - | - | 36.25335 | 653.549195 |
| NEG07488 | 366233.4299 | 363570.7627 | -0.01053 | 0.971744 | 0.9919 | 0.0189  | Molybdate                                                    | 21.278755  | - | - | - | 36.19605 | 164.986255 |
| NEG07493 | 249756.0195 | 225924.6093 | -0.14468 | 0.335962 | 0.7266 | 0.17205 | 1,2-Dichloropropane                                          | 6.1542433  | - | - | - | 36.16025 | 111.979119 |
| NEG07498 | 691552.8062 | 752181.9859 | 0.121242 | 0.537502 | 0.8243 | 0.16627 | Bruceine D                                                   | -7.2081655 | - | - | - | 36.1522  | 409.404765 |
| NEG07512 | 96094.67058 | 104171.6795 | 0.116435 | 0.764908 | 0.9208 | 0.04797 | Fosphenytoin                                                 | -20.012691 | - | - | - | 36.12715 | 361.259373 |
| NEG07514 | 56272.45631 | 64267.88515 | 0.191669 | 0.782588 | 0.926  | 0.02594 | Boc-Asn-OPhNO2                                               | 4.4801931  | - | - | - | 36.11615 | 352.321606 |
| NEG07518 | 385713.952  | 485955.6338 | 0.333293 | 0.345835 | 0.7309 | 0.31027 | Corilagin                                                    | -14.092174 | - | - | - | 36.0817  | 633.436583 |
| NEG07523 | 373558.8002 | 277925.2301 | -0.42664 | 0.353136 | 0.7326 | 0.34558 | Keaucea 2,6-Dichlorophenolindopheno                          | -0.8657329 | - | - | - | 35.9866  | 269.10389  |
| NEG07525 | 145098.7535 | 184017.8129 | 0.34281  | 0.063852 | 0.5055 | 0.22679 | UDP-2,4-bis(acetamido)-2,4,6-trideoxy-beta-L-<br>altrosamine | 1.5732649  | - | - | - | 35.9866  | 631.399918 |
| NEG07529 | 340556.4102 | 324752.5653 | -0.06855 | 0.809271 | 0.9347 | 0.08805 | Kolaflavanone                                                | -11.298099 | - | - | - | 35.97005 | 587.501174 |
| NEG07533 | 121403.764  | 99112.68034 | -0.29267 | 0.237526 | 0.6801 | 0.11405 | Oxaziclomefone                                               | 15.210457  | - | - | - | 35.9536  | 375.274847 |
| NEG07534 | 173977.0761 | 140968.8118 | -0.30352 | 0.462583 | 0.7842 | 0.16405 | L-Threonylcarbamoyladenyl<br>ate                             | 20.031139  | - | - | - | 35.9482  | 491.337185 |
| NEG07541 | 547711.9827 | 597521.8953 | 0.125574 | 0.809823 | 0.9347 | 0.11559 | Dimethyl selenide                                            | -0.0135414 | - | - | - | 35.92125 | 108.021722 |

|          |             |             |          |          |        |         |                                                                        |            |   |   |   |          |            |
|----------|-------------|-------------|----------|----------|--------|---------|------------------------------------------------------------------------|------------|---|---|---|----------|------------|
| NEG07542 | 70326.81373 | 77421.76394 | 0.138664 | 0.609201 | 0.8528 | 0.04996 | {4,11-dimethoxy-1-methoxy-10-oxo-2-oxatricyclo[1.2.2]hept-5-ene        | -15.402508 | - | - | - | 35.9191  | 437.43597  |
| NEG07546 | 321729.0127 | 347492.42   | 0.111135 | 0.424902 | 0.7672 | 0.14252 | Monobromobisphenol A                                                   | -14.282771 | - | - | - | 35.8563  | 306.170736 |
| NEG07548 | 79602.75766 | 83783.66578 | 0.073851 | 0.775723 | 0.9235 | 0.01091 | Felodipine                                                             | -8.2712302 | - | - | - | 35.8506  | 383.243545 |
| NEG07558 | 1085362.761 | 533705.6321 | -1.02406 | 0.142739 | 0.6112 | 0.84181 | Glyphosine                                                             | -0.6597413 | - | - | - | 35.8166  | 262.07215  |
| NEG07559 | 867342.7935 | 1115280.164 | 0.362732 | 0.58417  | 0.8415 | 0.37564 | 2-Oxo-4-phosphonobutanoate                                             | 2.7350234  | - | - | - | 35.8158  | 181.061721 |
| NEG07563 | 482321.0458 | 497471.7714 | 0.044621 | 0.899591 | 0.9672 | 0.06466 | 3,4,5-trimethoxy-6-(2-hydroxy-7-methoxy-2H-1,2-benzodioxol-5-yl)phenol | 3.0661963  | - | - | - | 35.8154  | 387.274914 |
| NEG07564 | 225399.1078 | 298130.0672 | 0.40346  | 0.363279 | 0.7392 | 0.17475 | Methylgallic acid-O-sulphate                                           | -1.0360219 | - | - | - | 35.8147  | 263.20145  |
| NEG07566 | 231678.2198 | 254565.0228 | 0.135912 | 0.841592 | 0.9478 | 0.03425 | Phosphoenol-4-deoxy-3-tetulosate                                       | 0.888986   | - | - | - | 35.8136  | 197.060799 |
| NEG07568 | 86625.63129 | 81737.14287 | -0.0838  | 0.622282 | 0.8589 | 0.05207 | Perfluorohexane sulfonic acid                                          | 14.00977   | - | - | - | 35.8068  | 399.113329 |
| NEG07569 | 152062.7976 | 105594.2004 | -0.52614 | 0.303667 | 0.7152 | 0.2053  | Antrafenine                                                            | -19.029858 | - | - | - | 35.806   | 587.525024 |
| NEG07570 | 108386.7316 | 105034.3386 | -0.04533 | 0.775861 | 0.9235 | 0.02154 | Arnamiol                                                               | -22.582368 | - | - | - | 35.8026  | 449.93454  |
| NEG07573 | 356524.8416 | 90065.39312 | -1.98496 | 0.240926 | 0.6822 | 0.41274 | Bropirimine                                                            | 1.3018654  | - | - | - | 35.79365 | 265.08707  |
| NEG07578 | 351363.8916 | 217339.5162 | -0.69302 | 0.073695 | 0.5234 | 0.40122 | Sanguisorbic acid dilactone                                            | 14.804637  | - | - | - | 35.7814  | 469.295986 |
| NEG07582 | 468811.588  | 391705.8574 | -0.25924 | 0.420953 | 0.7661 | 0.21235 | 2,6-Dichloroindophenol                                                 | 7.7363038  | - | - | - | 35.7522  | 267.090297 |
| NEG07585 | 147483.6471 | 111754.335  | -0.40022 | 0.227825 | 0.6714 | 0.18223 | CDP-choline                                                            | -21.463372 | - | - | - | 35.74865 | 487.306242 |
| NEG07589 | 892657.6847 | 952880.8459 | 0.094189 | 0.729733 | 0.9083 | 0.17138 | Dimethyl 2-galloylgalactarate                                          | 4.3405913  | - | - | - | 35.7342  | 389.290618 |
| NEG07590 | 80494.41216 | 60841.47914 | -0.40383 | 0.330593 | 0.7228 | 0.15592 | Quercetin 3-O-beta-D-glucosyl-(1->2)-beta-D-glucoside                  | 10.00432   | - | - | - | 35.7243  | 625.515891 |
| NEG07594 | 68513.35907 | 64964.93646 | -0.07672 | 0.744962 | 0.9131 | 0.02446 | Armillaridin                                                           | 18.189528  | - | - | - | 35.6796  | 447.936889 |
| NEG07599 | 287849.2638 | 243127.6908 | -0.2436  | 0.490169 | 0.7998 | 0.17185 | 4-(4-hydroxyphenyl)-2-butanone O-[2,6-dichlorobenzoyl]hydrazone        | 9.7013974  | - | - | - | 35.6663  | 629.549041 |
| NEG07600 | 396709.8376 | 195758.8864 | -1.01901 | 0.012581 | 0.2923 | 0.6172  | Cycloguanil hydrochloride                                              | -13.828838 | - | - | - | 35.66395 | 287.165038 |
| NEG07601 | 130391.1946 | 156707.1566 | 0.265225 | 0.475739 | 0.7932 | 0.12717 | Isoscoparine                                                           | 7.3500226  | - | - | - | 35.6467  | 461.399622 |
| NEG07605 | 158296.9447 | 108682.0292 | -0.54252 | 0.16941  | 0.6304 | 0.21469 | dUMP                                                                   | -1.9668213 | - | - | - | 35.6315  | 307.174017 |
| NEG07614 | 90542.42814 | 88727.19254 | -0.02922 | 0.941668 | 0.9804 | 0.00175 | O-Carbamoyladenylate                                                   | -11.941854 | - | - | - | 35.5961  | 389.234063 |

|          |             |             |          |          |        |         |                                                       |            |   |   |   |          |            |
|----------|-------------|-------------|----------|----------|--------|---------|-------------------------------------------------------|------------|---|---|---|----------|------------|
| NEG07615 | 307545.075  | 286748.5716 | -0.10101 | 0.863362 | 0.9547 | 0.09053 | Aurothioglucose                                       | 8.4500358  | - | - | - | 35.5961  | 391.176137 |
| NEG07625 | 1035860.088 | 1386953.311 | 0.42109  | 0.570104 | 0.8352 | 0.35032 | Arsenocholine                                         | 11.152742  | - | - | - | 35.55375 | 164.079665 |
| NEG07626 | 434070.0756 | 387171.1884 | -0.16496 | 0.57583  | 0.8384 | 0.11899 | p-Aminobenzamidine<br>dihydrochloride                 | 2.243233   | - | - | - | 35.54995 | 207.08149  |
| NEG07632 | 282787.1327 | 230562.1446 | -0.29456 | 0.080827 | 0.5377 | 0.28066 | o-((10,12-dioxo-4-<br>dihydroxyphenyl)-13-            | 3.6491175  | - | - | - | 35.52135 | 627.534017 |
| NEG07635 | 1558609.345 | 1919505.006 | 0.300475 | 0.686662 | 0.89   | 0.4748  | hydroxy-4-oxo-3,5,6,7-<br>tetrahydro-4-oxo-4H-        | 18.970484  | - | - | - | 35.5117  | 413.290583 |
| NEG07637 | 46437.65491 | 33677.01661 | -0.46353 | 0.650297 | 0.8731 | 0.04434 | ((1,8,9,12,13,14,17,18,19,<br>25,29-undecahydroxy-    | 3.2433218  | - | - | - | 35.5116  | 711.495034 |
| NEG07640 | 93305.48385 | 83098.36361 | -0.16714 | 0.387773 | 0.7498 | 0.07542 | Aluminoparaaminosalicyl<br>ate calcium                | -18.944097 | - | - | - | 35.5112  | 403.306264 |
| NEG07641 | 5990.42095  | 8018.04205  | 0.420593 | 0.723705 | 0.9063 | 0.00731 | 4-Pyridoxate                                          | 4.5367959  | - | - | - | 35.50875 | 182.154954 |
| NEG07644 | 318380.4864 | 427951.9106 | 0.426697 | 0.561207 | 0.8325 | 0.22498 | Acetyl citrate                                        | 8.6398634  | - | - | - | 35.49155 | 231.139029 |
| NEG07646 | 343484.5911 | 228291.3547 | -0.58937 | 0.371879 | 0.7415 | 0.30992 | D-Fructose 6-phosphate                                | 18.626547  | - | - | - | 35.486   | 259.133369 |
| NEG07648 | 172105.5768 | 268933.5784 | 0.643956 | 0.056361 | 0.4892 | 0.3719  | 1-epi-Valienol 7-<br>phosphate                        | -2.5790326 | - | - | - | 35.481   | 255.139163 |
| NEG07649 | 118342.3065 | 32008.1035  | -1.88646 | 0.058194 | 0.4907 | 0.34455 | Diclofop                                              | -12.443247 | - | - | - | 35.481   | 326.148052 |
| NEG07653 | 128455.2097 | 220778.8895 | 0.781337 | 0.519801 | 0.8139 | 0.25559 | Shikimate 3-phosphate                                 | -2.7299747 | - | - | - | 35.4732  | 253.12323  |
| NEG07658 | 326197.2764 | 263069.3239 | -0.3103  | 0.058095 | 0.4907 | 0.28815 | dUDP                                                  | -11.829919 | - | - | - | 35.4635  | 387.149931 |
| NEG07662 | 214061.3736 | 164533.0042 | -0.37965 | 0.026816 | 0.367  | 0.25112 | 5-(2,7-dimethoxy-2-(4-<br>hydroxy-3-                  | -2.8155838 | - | - | - | 35.45285 | 571.513111 |
| NEG07663 | 1607729.004 | 1664664.931 | 0.050208 | 0.906381 | 0.9697 | 0.19971 | methoxyphenyl)-3-(3,5,6,7-<br>tetrahydroxy-4-oxo-3,4- | 8.7964176  | - | - | - | 35.4519  | 415.306385 |
| NEG07665 | 174072.2496 | 143641.8586 | -0.27721 | 0.24125  | 0.6822 | 0.17002 | Erythro-4-hydroxy-L-<br>glutamate(1-)                 | 11.079332  | - | - | - | 35.44555 | 161.11652  |
| NEG07667 | 51632153.03 | 48175647.92 | -0.09997 | 0.817276 | 0.9369 | 1.20109 | 2-Iodo-6-methoxyphenol                                | 21.90451   | - | - | - | 35.4373  | 249.032    |
| NEG07672 | 1104304.694 | 968888.708  | -0.18874 | 0.588221 | 0.8421 | 0.18328 | 3,4-Dihydroxyphthalate                                | -20.591315 | - | - | - | 35.3937  | 197.118244 |
| NEG07687 | 1161391.838 | 958833.5393 | -0.2765  | 0.151075 | 0.6145 | 0.44752 | 4-Amino-2,6-<br>dinitrotoluene                        | 6.954761   | - | - | - | 35.33625 | 196.142295 |
| NEG07707 | 193029.7828 | 154159.2835 | -0.3244  | 0.063198 | 0.5039 | 0.20746 | Geniposide pentaacetate                               | -24.031884 | - | - | - | 35.2889  | 597.528239 |
| NEG07708 | 35781.19994 | 26659.06452 | -0.42458 | 0.251704 | 0.6861 | 0.08895 | 2',6'-Di-O-acetylononin                               | 0.5551046  | - | - | - | 35.278   | 513.471009 |
| NEG07717 | 304650.1532 | 177633.7537 | -0.77825 | 0.03226  | 0.4009 | 0.42179 | 1-Deoxy-D-altro-<br>heptulose 7-phosphate             | -21.265061 | - | - | - | 35.2192  | 273.149293 |

|          |             |             |          |          |        |         |                                                               |            |   |   |   |          |            |
|----------|-------------|-------------|----------|----------|--------|---------|---------------------------------------------------------------|------------|---|---|---|----------|------------|
| NEG07718 | 305300.9835 | 98943.03085 | -1.62556 | 0.281778 | 0.7016 | 0.35862 | Alginic acid                                                  | 18.52075   | - | - | - | 35.213   | 417.227969 |
| NEG07720 | 132419.1959 | 104729.4004 | -0.33845 | 0.277106 | 0.6995 | 0.15519 | 5,7-dihydroxy-2-(4-methoxyphenyl)-2,6                         | 3.2345233  | - | - | - | 35.2065  | 623.542744 |
| NEG07721 | 51909.19781 | 36993.26383 | -0.48873 | 0.3833   | 0.7477 | 0.08086 | Aripiprazole                                                  | 11.202959  | - | - | - | 35.20585 | 447.383147 |
| NEG07723 | 186404.7001 | 184273.2802 | -0.01659 | 0.971003 | 0.9918 | 0.07165 | Luteoskyrin                                                   | 7.8634099  | - | - | - | 35.2043  | 573.485741 |
| NEG07724 | 110821.5636 | 73344.65212 | -0.59547 | 0.055392 | 0.4884 | 0.22125 | Aluminoparaaminosalicylate calcium                            | 18.175949  | - | - | - | 35.20065 | 403.321272 |
| NEG07725 | 71828.25181 | 57269.47879 | -0.32678 | 0.166146 | 0.6281 | 0.11255 | 5-O-(methyl-5-ylacetylmyo-inositol) D-xylofuranose            | -10.515104 | - | - | - | 35.19725 | 498.452671 |
| NEG07728 | 707906.9882 | 350721.613  | -1.01323 | 0.001378 | 0.1079 | 0.84787 | Dichlorophenylcarbamoyl                                       | -3.9072361 | - | - | - | 35.1905  | 301.144743 |
| NEG07729 | 236619.1822 | 191615.9806 | -0.30435 | 0.064143 | 0.5065 | 0.22726 | Amarogentin                                                   | -7.6833191 | - | - | - | 35.1891  | 585.528917 |
| NEG07734 | 71558.98671 | 46210.04329 | -0.63093 | 0.029268 | 0.3835 | 0.1905  | Cefamandole fate                                              | 8.7972704  | - | - | - | 35.17335 | 511.491832 |
| NEG07739 | 133472.9509 | 122782.6903 | -0.12044 | 0.807413 | 0.934  | 0.04818 | 6,11-dihydroxy-5-methyl-7-(3,4,5-trihydroxyphenyl)-2,8        | -4.0729986 | - | - | - | 35.1582  | 340.285333 |
| NEG07743 | 735497.0331 | 659977.1809 | -0.1563  | 0.201491 | 0.6597 | 0.25764 | SN38 glucuronide carboxylate form                             | -5.2110127 | - | - | - | 35.15365 | 584.525772 |
| NEG07745 | 227906.057  | 225353.0286 | -0.01625 | 0.962436 | 0.9888 | 0.04198 | L 735821                                                      | 15.956695  | - | - | - | 35.1451  | 463.343433 |
| NEG07746 | 168431.248  | 162698.7253 | -0.04996 | 0.76713  | 0.9214 | 0.03405 | 3-Demethylsimmondsin 2&apos;-(Z)-ferulate                     | -2.7933424 | - | - | - | 35.1383  | 536.504322 |
| NEG07748 | 220041.9214 | 239341.7843 | 0.121294 | 0.871372 | 0.9572 | 0.03193 | Kaempferol 3-O-beta-D-xyloside                                | -15.501793 | - | - | - | 35.1367  | 417.337138 |
| NEG07750 | 355910.1425 | 328780.4176 | -0.11439 | 0.430978 | 0.77   | 0.11944 | Loganin pentaacetate                                          | -22.865661 | - | - | - | 35.13505 | 599.544691 |
| NEG07752 | 229066.6295 | 110275.1362 | -1.05466 | 0.024486 | 0.3595 | 0.45634 | Pencozole                                                     | -24.847808 | - | - | - | 35.1334  | 283.169962 |
| NEG07757 | 178855.1924 | 153318.2976 | -0.22226 | 0.519417 | 0.8137 | 0.1387  | 2-Phosphoglycolate                                            | -0.5001616 | - | - | - | 35.12835 | 155.023945 |
| NEG07761 | 99514.43412 | 110779.3893 | 0.154712 | 0.753386 | 0.9162 | 0.06217 | O-Carbamoyladenylate                                          | 22.289798  | - | - | - | 35.11645 | 389.247422 |
| NEG07762 | 312058.2481 | 263081.8315 | -0.2463  | 0.188958 | 0.6466 | 0.21098 | N-Trimethyl-2-aminoethylphosphate                             | 0.4955664  | - | - | - | 35.1115  | 167.144107 |
| NEG07765 | 247526.4771 | 217225.3355 | -0.18839 | 0.391085 | 0.7513 | 0.1404  | 5-methylendioctylol 1-[glucosyl-(1-&gt;4)-galactoside]        | 10.270904  | - | - | - | 35.1021  | 625.559159 |
| NEG07766 | 269980.1988 | 231217.5074 | -0.2236  | 0.511969 | 0.8097 | 0.19322 | TEPP                                                          | 1.5877882  | - | - | - | 35.0946  | 289.180884 |
| NEG07769 | 374020.7293 | 346363.0727 | -0.11083 | 0.470256 | 0.7899 | 0.12368 | Myxochelin C                                                  | -12.37087  | - | - | - | 35.0861  | 538.519949 |
| NEG07781 | 219489.4685 | 195000.4998 | -0.17067 | 0.307882 | 0.7158 | 0.10349 | 5,4,5-trihydroxy-6-(5-{3,5,7-trihydroxy-6-[3,4,5-trihydroxy-6 | 23.097149  | - | - | - | 35.0384  | 611.543871 |

|          |             |             |          |          |        |         |                                                                                             |            |   |   |   |          |            |
|----------|-------------|-------------|----------|----------|--------|---------|---------------------------------------------------------------------------------------------|------------|---|---|---|----------|------------|
| NEG07783 | 363882.8221 | 283300.1978 | -0.36114 | 0.202986 | 0.6615 | 0.1901  | Flucarbazono-sodium                                                                         | -19.781286 | - | - | - | 35.0365  | 417.265449 |
| NEG07784 | 653844.2228 | 638197.9742 | -0.03494 | 0.907006 | 0.9697 | 0.01452 | O-Phosphorylhydroxylamine                                                                   | 13.417581  | - | - | - | 35.022   | 112.00404  |
| NEG07793 | 979844.2039 | 832854.0306 | -0.23449 | 0.070243 | 0.5226 | 0.44076 | Nitrofurantoin                                                                              | -0.711943  | - | - | - | 34.95575 | 237.149554 |
| NEG07794 | 228052.6102 | 211588.5106 | -0.10811 | 0.413684 | 0.762  | 0.09235 | 5,4,3-trimethoxy-2-hydroxy(3,4,5-trihydroxyphenyl)-Orotidine 5'&apos;-phosphate             | 24.091037  | - | - | - | 34.95575 | 613.560529 |
| NEG07796 | 124919.1194 | 122771.4584 | -0.02502 | 0.922622 | 0.9741 | 0.03049 | Orotidine 5'&apos;-phosphate                                                                | -12.745897 | - | - | - | 34.9547  | 367.17883  |
| NEG07798 | 104740.3888 | 118945.3633 | 0.183481 | 0.830338 | 0.9436 | 0.05516 | Cyanidin 3-O-rutinoside                                                                     | -15.21745  | - | - | - | 34.9547  | 594.509661 |
| NEG07799 | 118895.0541 | 86697.38334 | -0.45563 | 0.111224 | 0.5699 | 0.2129  | 2-Amino-1,2-bis(p-chlorophenyl)ethanol                                                      | -11.240861 | - | - | - | 34.93705 | 281.154652 |
| NEG07800 | 740389.3912 | 849390.1298 | 0.198143 | 0.738908 | 0.912  | 0.26698 | Benzoylprop-ethyl                                                                           | 14.123687  | - | - | - | 34.9337  | 365.236396 |
| NEG07803 | 218760.225  | 292943.1975 | 0.42127  | 0.633229 | 0.8645 | 0.11819 | Glyphosate-monoammonium                                                                     | 4.5178031  | - | - | - | 34.9092  | 185.097164 |
| NEG07804 | 347243.4914 | 366579.2884 | 0.078178 | 0.885437 | 0.961  | 0.00507 | Imazalil nitrate                                                                            | 3.5088187  | - | - | - | 34.907   | 359.186587 |
| NEG07806 | 35278.18145 | 30384.85076 | -0.21542 | 0.590463 | 0.843  | 0.05729 | Cefixime                                                                                    | 10.01815   | - | - | - | 34.8922  | 452.446866 |
| NEG07812 | 64686.16356 | 308005.7431 | 2.251428 | 0.020373 | 0.3448 | 0.55041 | Primisulfuron                                                                               | -5.3143671 | - | - | - | 34.8832  | 453.300709 |
| NEG07816 | 73188.44147 | 66806.4136  | -0.13163 | 0.649454 | 0.8724 | 0.03848 | 6-[5-(6,7-dimethoxy-2H-1,3-benzodioxol-5-yl)oxirane]-2-Leucodelphinidin                     | -0.2049125 | - | - | - | 34.87545 | 443.337632 |
| NEG07817 | 4540.506635 | 10620.92828 | 1.225985 | 0.417243 | 0.7646 | 0.04819 | Leucodelphinidin                                                                            | -17.42553  | - | - | - | 34.8622  | 321.254008 |
| NEG07819 | 204368.6519 | 173177.3431 | -0.23892 | 0.101487 | 0.5624 | 0.19129 | Lipoyl-GMP                                                                                  | -7.0532437 | - | - | - | 34.8599  | 550.519833 |
| NEG07827 | 42695.02108 | 37972.76769 | -0.1691  | 0.545691 | 0.8273 | 0.062   | Amaranth                                                                                    | -24.202396 | - | - | - | 34.8482  | 537.50769  |
| NEG07830 | 204784.3692 | 206598.2706 | 0.012723 | 0.94199  | 0.9805 | 0.01299 | 12-(5,4-dimethoxyphenyl)-13-hydroxy-6-(4-hydroxy-2-methoxyphenyl)-8-Tri-N-acetylchitotriose | 0.6601517  | - | - | - | 34.84    | 627.576138 |
| NEG07832 | 596915.4581 | 563069.0783 | -0.08421 | 0.581595 | 0.8399 | 0.10565 | Tri-N-acetylchitotriose                                                                     | -20.340245 | - | - | - | 34.8276  | 626.572758 |
| NEG07834 | 267216.1623 | 241962.9931 | -0.14322 | 0.349061 | 0.7321 | 0.15095 | Spirolaurenone                                                                              | -2.4827504 | - | - | - | 34.8159  | 298.23848  |
| NEG07837 | 123601.9399 | 106635.1803 | -0.21302 | 0.356226 | 0.7345 | 0.07974 | 3,4,5-trimethoxytricetin 7-cyclic di-Trimethoxytricetin 7-cyclic di-                        | -22.308133 | - | - | - | 34.8042  | 651.575365 |
| NEG07838 | 76836.04252 | 111768.497  | 0.540658 | 0.124244 | 0.5898 | 0.17077 | 3,4,5-trimethoxytricetin 7-cyclic di-                                                       | 16.579785  | - | - | - | 34.8042  | 657.41554  |
| NEG07840 | 196070.0689 | 180683.2661 | -0.11791 | 0.519792 | 0.8139 | 0.10722 | 2-amino-4-[(1-((carboxymethyl)-C-5,4,3-trimethoxy-6-[[1,3-hydroxy-10-(3-hydroxybutanoyl)-2  | -20.7873   | - | - | - | 34.79915 | 566.550925 |
| NEG07845 | 60738.41787 | 50652.00845 | -0.26199 | 0.315099 | 0.7189 | 0.07942 | hydroxy-10-(3-hydroxybutanoyl)-2                                                            | -17.312609 | - | - | - | 34.7941  | 565.538915 |



|          |             |             |          |          |        |         |                                                                                                       |            |   |   |   |          |            |
|----------|-------------|-------------|----------|----------|--------|---------|-------------------------------------------------------------------------------------------------------|------------|---|---|---|----------|------------|
| NEG07846 | 98217.88002 | 64411.39592 | -0.60867 | 0.120607 | 0.5836 | 0.16549 | Baicalin                                                                                              | -1.13317   | - | - | - | 34.79055 | 445.353218 |
| NEG07847 | 628252.2018 | 521454.5611 | -0.2688  | 0.096596 | 0.5573 | 0.3228  | Chlorhexidine acetate                                                                                 | 22.176511  | - | - | - | 34.7857  | 624.557096 |
| NEG07854 | 295789.4166 | 276820.5302 | -0.09562 | 0.591274 | 0.8436 | 0.08356 | (O-carboxy-3,4,5-trihydroxyoxan-2-yl)(4-hydroxy-7-oxabicyclo[2.2.1]hept-2-ylidene)acetate             | 10.360338  | - | - | - | 34.76755 | 622.541184 |
| NEG07859 | 157675.4098 | 156443.2416 | -0.01132 | 0.946992 | 0.9827 | 0.01402 | Robecoxib                                                                                             | 10.160006  | - | - | - | 34.75145 | 326.269549 |
| NEG07861 | 453417.9835 | 615540.4195 | 0.441012 | 0.339074 | 0.7277 | 0.26991 | 4-(N-Maleimido)phenyltrimethylammonium iodide                                                         | 14.886029  | - | - | - | 34.7451  | 357.172955 |
| NEG07862 | 311671.3139 | 262607.9509 | -0.24711 | 0.183213 | 0.642  | 0.20592 | Malvidin 3-(6-coumaroylglucoside)                                                                     | -0.0366504 | - | - | - | 34.74505 | 638.5728   |
| NEG07863 | 129438.3188 | 91285.94976 | -0.5038  | 0.053606 | 0.4853 | 0.21281 | Plantamajoside                                                                                        | -6.116974  | - | - | - | 34.74505 | 639.575305 |
| NEG07864 | 45512.4731  | 54404.86717 | 0.257474 | 0.593216 | 0.8447 | 0.05084 | Secogalioside                                                                                         | -13.267089 | - | - | - | 34.745   | 419.352446 |
| NEG07866 | 130332.0012 | 541715.0684 | 2.055343 | 0.285866 | 0.7027 | 0.64405 | 3,4-Hexahydroxydiphenylarsinic acid                                                                   | 20.637078  | - | - | - | 34.71915 | 451.324558 |
| NEG07867 | 56909.42723 | 44380.98748 | -0.35873 | 0.166007 | 0.6281 | 0.11104 | (Z)-Resveratrol                                                                                       | 11.042928  | - | - | - | 34.7191  | 551.523325 |
| NEG07876 | 106502.4251 | 71140.16454 | -0.58215 | 0.100932 | 0.5624 | 0.2039  | 3,4'-diglucoside L-(1,3,4,6,9,10-pentahydroxy-6-oxo-6H-benzof[1,2-b:4,5-b']oxepin-1-yl)pentanoic acid | -8.1812321 | - | - | - | 34.69055 | 376.250637 |
| NEG07879 | 71715.68197 | 65657.56248 | -0.12733 | 0.363662 | 0.7394 | 0.07219 | Osthenol-7-O-beta-D-gentiobioside                                                                     | 10.529685  | - | - | - | 34.6525  | 553.538963 |
| NEG07882 | 89523.97425 | 82840.41345 | -0.11194 | 0.752687 | 0.9157 | 0.04056 | Deoxyribose triphosphate                                                                              | -0.7750401 | - | - | - | 34.644   | 373.062633 |
| NEG07888 | 126267.9537 | 122730.4356 | -0.041   | 0.754207 | 0.9166 | 0.03586 | Riccionidin A                                                                                         | 7.2840835  | - | - | - | 34.6226  | 284.223201 |
| NEG07889 | 300791.4072 | 281583.6289 | -0.0952  | 0.827711 | 0.9421 | 0.13555 | Atheroline                                                                                            | 24.124483  | - | - | - | 34.6226  | 336.326961 |
| NEG07891 | 134511.4795 | 137774.9104 | 0.034584 | 0.972944 | 0.9921 | 0.05985 | Cartormin                                                                                             | -24.586632 | - | - | - | 34.61805 | 574.496673 |
| NEG07896 | 96837.88899 | 84792.30266 | -0.19164 | 0.367312 | 0.7403 | 0.10469 | Streptomycin                                                                                          | -0.1693363 | - | - | - | 34.59125 | 580.566725 |
| NEG07897 | 55063.34225 | 50272.55942 | -0.13132 | 0.473602 | 0.792  | 0.04361 | Rhamnazin 3-rutinoside                                                                                | -7.7880973 | - | - | - | 34.58475 | 637.55845  |
| NEG07905 | 58863.56621 | 54696.3131  | -0.10593 | 0.823731 | 0.9405 | 0.06125 | [2,6-dimethyl-3-(3-phenylpropanoyl)phenyl]oxyacetic acid                                              | 22.228779  | - | - | - | 34.5616  | 337.330244 |
| NEG07910 | 95228.74809 | 92432.35645 | -0.043   | 0.8515   | 0.9515 | 0.03249 | Haemocorin                                                                                            | -7.5773933 | - | - | - | 34.54485 | 641.591854 |
| NEG07911 | 62570.23836 | 55858.36269 | -0.1637  | 0.532941 | 0.8215 | 0.06718 | Citrusin B                                                                                            | -9.0106332 | - | - | - | 34.5385  | 567.5545   |
| NEG07914 | 58970.63114 | 152188.4433 | 1.36779  | 0.415295 | 0.7629 | 0.19192 | To mentin                                                                                             | -4.0988537 | - | - | - | 34.5337  | 345.279604 |
| NEG07918 | 518770.4312 | 238700.3194 | -1.1199  | 0.323371 | 0.7192 | 0.40185 | 4-(N-Maleimido)benzyltrimethylammonium iodide                                                         | -20.930331 | - | - | - | 34.5154  | 371.186433 |

|          |             |             |          |          |        |         |                                                                                                                                                                |            |   |   |   |          |            |
|----------|-------------|-------------|----------|----------|--------|---------|----------------------------------------------------------------------------------------------------------------------------------------------------------------|------------|---|---|---|----------|------------|
| NEG07923 | 52225.93305 | 53150.31172 | 0.025312 | 0.941559 | 0.9804 | 0.00517 | Diosmin                                                                                                                                                        | 8.3753184  | - | - | - | 34.5119  | 607.54252  |
| NEG07926 | 201645.5061 | 217243.9245 | 0.107495 | 0.618571 | 0.8572 | 0.07769 | {4-[(2,4-dimethoxy-3-oxo-6-[[3,4,5-trihydroxy-6-(hydroxymethyl)oxan-2-ylideneamino]oxy]oxy]phenyl]amino}-2,6-dinitrotoluene                                    | 7.2294668  | - | - | - | 34.50275 | 529.446558 |
| NEG07927 | 121236.2948 | 82379.68867 | -0.55746 | 0.313117 | 0.7189 | 0.18756 | Procymidone                                                                                                                                                    | -11.863822 | - | - | - | 34.4901  | 283.127252 |
| NEG07929 | 171812.5283 | 156679.1194 | -0.13302 | 0.314266 | 0.7189 | 0.12045 | 4-Hydroxylamino-2,6-dinitrotoluene                                                                                                                             | -14.537491 | - | - | - | 34.4678  | 212.137225 |
| NEG07931 | 155467.9431 | 170896.5633 | 0.136506 | 0.624265 | 0.8594 | 0.08894 | Malonyldaidzin                                                                                                                                                 | -2.8632811 | - | - | - | 34.4678  | 501.415585 |
| NEG07932 | 655489.552  | 580060.3314 | -0.17637 | 0.124071 | 0.5898 | 0.25461 | retargomun 3-O-3&apos;&apos;&apos;6&apos;&apos;&apos;                                                                                                          | -14.396322 | - | - | - | 34.4678  | 604.461807 |
| NEG07937 | 62436.46625 | 50737.7404  | -0.29933 | 0.370349 | 0.7409 | 0.0901  | Bromocriptine                                                                                                                                                  | 6.1885544  | - | - | - | 34.4548  | 653.591274 |
| NEG07940 | 3068534.917 | 4149212.168 | 0.435287 | 0.51063  | 0.8083 | 0.76776 | Niflumic acid                                                                                                                                                  | 5.4939878  | - | - | - | 34.4523  | 281.212274 |
| NEG07945 | 322267.5455 | 251094.435  | -0.36003 | 0.458694 | 0.7822 | 0.1886  | 5-Methyl-THF                                                                                                                                                   | -0.5202307 | - | - | - | 34.44675 | 502.419462 |
| NEG07949 | 332772.7801 | 2480409.745 | 2.897969 | 0.353561 | 0.7327 | 0.89351 | Anthragallol                                                                                                                                                   | -24.692474 | - | - | - | 34.4413  | 255.196697 |
| NEG07954 | 157094.581  | 167690.6814 | 0.094169 | 0.828398 | 0.9427 | 0.0034  | Cyamun 3-O-3&apos;&apos;&apos;6&apos;&apos;&apos;                                                                                                              | 15.682648  | - | - | - | 34.43585 | 620.47967  |
| NEG07955 | 331654.4651 | 352911.9645 | 0.089627 | 0.732313 | 0.9091 | 0.06136 | 4,6-dideoxy-5-C-methyl-1-mannose                                                                                                                               | 22.860297  | - | - | - | 34.4335  | 588.430698 |
| NEG07958 | 463817.6268 | 256174.3611 | -0.85643 | 0.099801 | 0.5613 | 0.53387 | Azacozole                                                                                                                                                      | -6.326812  | - | - | - | 34.4257  | 299.131424 |
| NEG07965 | 144697.9697 | 123974.9963 | -0.223   | 0.463195 | 0.7842 | 0.10794 | Molybdopterin guanine dinucleotide                                                                                                                             | 11.557314  | - | - | - | 34.4257  | 737.542559 |
| NEG07967 | 655948.5084 | 861341.6175 | 0.393003 | 0.326077 | 0.7202 | 0.42418 | 10(2Z,3(4Z,1Z,10Z,13Z,16Z)/22:6(4Z,7Z,10Z,13Z,16Z)/22:6(4Z,7Z,10Z,13Z,16Z)/22:6(4Z,7Z,10Z,13Z,16Z)-1,2,3,4-tetrahydro-alpha,7-dihydroxy-beta-(hydroxymethyl) 9 | -20.854291 | - | - | - | 34.40775 | 966.530546 |
| NEG07969 | 102131.5467 | 207374.295  | 1.021809 | 0.415255 | 0.7629 | 0.20566 | 1,2,3,4-tetrahydro-alpha,7-dihydroxy-beta-(hydroxymethyl) 9                                                                                                    | -4.9406929 | - | - | - | 34.4039  | 347.295103 |
| NEG07970 | 1133612.552 | 56050.80129 | -4.33805 | 0.322632 | 0.7192 | 0.76788 | Norbadione A                                                                                                                                                   | -7.484108  | - | - | - | 34.4039  | 677.496045 |
| NEG07972 | 46755.49112 | 39610.2862  | -0.23926 | 0.602675 | 0.8493 | 0.04694 | L-amino-4-((1-((carboxymethyl)-C-hydroxymethyl)amino)oxy)phenyl]amino}-2,6-dichlorobenzamide                                                                   | 24.064011  | - | - | - | 34.39445 | 592.567007 |
| NEG07974 | 97014.95451 | 285119.7122 | 1.555289 | 0.347396 | 0.7313 | 0.42475 | 2,6-Dichlorobenzamide                                                                                                                                          | 16.70234   | 2 | - | - | 34.38355 | 189.022597 |
| NEG07977 | 103295.297  | 115888.1814 | 0.165959 | 0.550517 | 0.8293 | 0.06217 | 4,4&apos;&apos;&apos;6&apos;&apos;&apos;-Tetranitro-2,2&apos;&apos;&apos;-azobenzene                                                                           | 19.403675  | - | - | - | 34.3796  | 405.264606 |
| NEG07978 | 100578.6055 | 66901.63534 | -0.58821 | 0.126301 | 0.5923 | 0.20719 | Oleuropein                                                                                                                                                     | -4.5358832 | - | - | - | 34.3796  | 539.504072 |
| NEG07982 | 51551.03621 | 50658.19015 | -0.02521 | 0.90767  | 0.9697 | 0.01834 | Diflufenican                                                                                                                                                   | -20.798623 | - | - | - | 34.3632  | 393.279423 |
| NEG07988 | 206790.5976 | 224973.8261 | 0.121587 | 0.709964 | 0.9015 | 0.0311  | GDP-4-acetamido-4,6-dideoxy-alpha-D-mannose                                                                                                                    | -2.8614434 | - | - | - | 34.33655 | 629.38452  |

|          |             |             |          |          |        |         |                                                                                                                                               |            |   |   |   |          |            |
|----------|-------------|-------------|----------|----------|--------|---------|-----------------------------------------------------------------------------------------------------------------------------------------------|------------|---|---|---|----------|------------|
| NEG07990 | 748547.0427 | 925149.6252 | 0.305594 | 0.298895 | 0.7148 | 0.35646 | Selenium Sulfide                                                                                                                              | 17.797918  | - | - | - | 34.3325  | 110.0247   |
| NEG07996 | 630850.3443 | 844219.8526 | 0.420321 | 0.431695 | 0.77   | 0.37725 | 2,4-Dihydroxypteridine                                                                                                                        | -8.7389712 | - | - | - | 34.3095  | 163.112889 |
| NEG08002 | 252886.5482 | 125930.481  | -1.00586 | 0.108274 | 0.5681 | 0.36129 | MC-5127                                                                                                                                       | 21.511958  | - | - | - | 34.2926  | 355.157885 |
| NEG08005 | 102671.5819 | 162699.9133 | 0.664177 | 0.180866 | 0.6407 | 0.24336 | 1G(2Z,3(4Z,1Z,10Z,13Z,16Z)/O-6Z)/O-18-O,2Z,5(1Z,7Z,10Z,13Z)-3,4,5-trihydroxy-6-(1Z-hydroxy-13,14-dimethoxy-5-Fluorodeoxyuridine monophosphate | -5.8983318 | - | - | - | 34.2887  | 968.537005 |
| NEG08006 | 113186.8486 | 113625.4892 | 0.00558  | 0.976978 | 0.9934 | 0.00298 | 5-Fluorodeoxyuridine monophosphate                                                                                                            | 6.9029501  | - | - | - | 34.28865 | 503.396205 |
| NEG08014 | 616726.3264 | 37510166.4  | 5.926507 | 0.013389 | 0.2989 | 8.3516  | Aluminum acetoacetate                                                                                                                         | 10.851988  | - | - | - | 34.25405 | 325.168563 |
| NEG08016 | 123406.3467 | 91973.70175 | -0.42412 | 0.091522 | 0.5568 | 0.19734 | Aluminum acetoacetate                                                                                                                         | -13.446244 | - | - | - | 34.2338  | 329.211883 |
| NEG08025 | 79014.29894 | 91731.17276 | 0.215298 | 0.544033 | 0.827  | 0.06071 | 11-O-Demethylpradinone I                                                                                                                      | 17.234573  | - | - | - | 34.213   | 463.378527 |
| NEG08027 | 7374.933072 | 5504.505464 | -0.42202 | 0.413484 | 0.762  | 0.04104 | Dihydro-ME                                                                                                                                    | -10.585354 | - | - | - | 34.186   | 397.351307 |
| NEG08029 | 2724697.294 | 2744894.056 | 0.010655 | 0.959922 | 0.9877 | 0.05613 | 6-(10-(3,4-dimethoxy-6-methyl-5-oxooxan-2-yl)-2-(2,4-dihydroxyphenyl)-5-TG(15:0/20:5(5Z,8Z,11Z,14Z,17Z)/24:1(15Z)) P-N,N'-                    | -0.1590171 | - | - | - | 34.18175 | 605.481627 |
| NEG08031 | 38264.74641 | 46673.27877 | 0.286581 | 0.61805  | 0.8569 | 0.06151 | (Dimethylamino)phenyldiazonium fluoroborate                                                                                                   | -21.281236 | - | - | - | 34.1715  | 948.512516 |
| NEG08033 | 155515.8869 | 125976.8827 | -0.3039  | 0.159756 | 0.6215 | 0.18102 | (Dimethylamino)phenyldiazonium fluoroborate                                                                                                   | 24.375244  | - | - | - | 34.1682  | 233.988151 |
| NEG08040 | 251297.1318 | 106722.0026 | -1.23554 | 0.260481 | 0.6904 | 0.31394 | 1'-hydroxytriazolam                                                                                                                           | 24.44842   | - | - | - | 34.13995 | 358.210505 |
| NEG08041 | 78975.27736 | 65899.01005 | -0.26114 | 0.189395 | 0.6466 | 0.12413 | Hesperidin                                                                                                                                    | 7.3390628  | - | - | - | 34.13995 | 609.557804 |
| NEG08045 | 456062.5262 | 473723.9557 | 0.054815 | 0.794834 | 0.9292 | 0.05467 | m-Trigallic acid                                                                                                                              | 12.520016  | - | - | - | 34.1317  | 473.326762 |
| NEG08049 | 674782.674  | 606199.8217 | -0.15463 | 0.482984 | 0.7977 | 0.24038 | Cisplatin                                                                                                                                     | -0.0213619 | - | - | - | 34.1253  | 299.043717 |
| NEG08055 | 49097.29259 | 50739.97941 | 0.047479 | 0.861728 | 0.9541 | 0.00509 | alpha, alpha'-Trehalose 6-phosphate                                                                                                           | 13.030838  | - | - | - | 34.1192  | 421.274626 |
| NEG08057 | 103819.8247 | 82631.29516 | -0.32932 | 0.577211 | 0.8394 | 0.1522  | Sedoheptulose 7-phosphate                                                                                                                     | 18.080355  | - | - | - | 34.1132  | 289.15977  |
| NEG08060 | 200419.95   | 239044.2302 | 0.254251 | 0.055074 | 0.4884 | 0.20856 | Zoledronate                                                                                                                                   | 4.8999786  | - | - | - | 34.09725 | 271.083657 |
| NEG08061 | 444567.3456 | 531716.4969 | 0.258255 | 0.498174 | 0.8016 | 0.17147 | Gardenoside                                                                                                                                   | -2.5918636 | - | - | - | 34.09725 | 403.357575 |
| NEG08069 | 929828.07   | 919172.1955 | -0.01663 | 0.940583 | 0.9803 | 0.08156 | [Nitrilotris(methylene)]tris phosphonic acid                                                                                                  | 11.469168  | - | - | - | 34.0758  | 298.046153 |
| NEG08071 | 180747.5043 | 213086.2038 | 0.237461 | 0.586154 | 0.8419 | 0.08597 | 7a-Hydroxy-O-carbamoyl-deacetylcephalosporin C                                                                                                | -21.887211 | - | - | - | 34.07145 | 431.388959 |
| NEG08077 | 127248.0843 | 81353.32105 | -0.64537 | 0.062091 | 0.5022 | 0.21675 | 6-mercaptopurine ribonucleoside 5'-diphosphate                                                                                                | 2.5991131  | - | - | - | 34.0573  | 443.245378 |

|          |             |             |          |          |        |         |                                                                          |            |   |   |   |          |            |
|----------|-------------|-------------|----------|----------|--------|---------|--------------------------------------------------------------------------|------------|---|---|---|----------|------------|
| NEG08082 | 1007373.137 | 192893.203  | -2.38472 | 0.331399 | 0.7232 | 1.00383 | Hydroxyflutamide                                                         | -21.471769 | - | - | - | 34.0039  | 291.197749 |
| NEG08085 | 89907.68971 | 90884.74018 | 0.015594 | 0.971243 | 0.9918 | 0.03782 | 2-O-Galloyl-1,4-galactarolactone                                         | 20.684789  | - | - | - | 33.981   | 343.227644 |
| NEG08091 | 207323.425  | 199261.464  | -0.05722 | 0.690628 | 0.8924 | 0.06206 | Pyriprole                                                                | -9.9896632 | - | - | - | 33.9455  | 493.256286 |
| NEG08093 | 73358.82566 | 96199.77174 | 0.391063 | 0.145429 | 0.6127 | 0.15205 | 1-O,6-O-Digalloyl-beta-D-glucose                                         | -19.711065 | - | - | - | 33.9386  | 483.347576 |
| NEG08096 | 172659.0809 | 98328.30614 | -0.81225 | 0.101043 | 0.5624 | 0.30701 | 3,4,5-trihydroxy-0-(2,4,6-trihydroxybenzoyloxy)oxalane-2-carboxylic acid | 20.89038   | - | - | - | 33.91495 | 345.243957 |
| NEG08098 | 93177.75423 | 421599.2084 | 2.177815 | 0.000645 | 0.0947 | 0.82635 | Dichlofenthion                                                           | 17.447602  | - | - | - | 33.90575 | 314.151422 |
| NEG08102 | 43480.19518 | 34980.73813 | -0.3138  | 0.11485  | 0.5747 | 0.09934 | Forsythiaside                                                            | -11.358735 | - | - | - | 33.8749  | 623.572729 |
| NEG08105 | 190358.1347 | 217602.4105 | 0.192978 | 0.283235 | 0.7021 | 0.12091 | Chondroitin sulfate                                                      | -9.343933  | - | - | - | 33.86595 | 462.357394 |
| NEG08109 | 33025.59582 | 32753.6618  | -0.01193 | 0.955136 | 0.9856 | 0.02313 | Enilcozole                                                               | -24.499014 | - | - | - | 33.84715 | 296.165243 |
| NEG08119 | 37465.12028 | 42753.33732 | 0.190489 | 0.598332 | 0.8466 | 0.03034 | Prosulfuron                                                              | 12.38524   | - | - | - | 33.7601  | 418.376818 |
| NEG08123 | 58961.47906 | 57868.5731  | -0.02699 | 0.896501 | 0.9654 | 0.02189 | Quercetin 3-O-glucoside                                                  | -16.156512 | - | - | - | 33.7442  | 463.361521 |
| NEG08127 | 238348.8082 | 139571.5798 | -0.77207 | 0.221685 | 0.6692 | 0.30545 | (3E)-4-(2-Carboxyphenyl)-2-oxobut-2-ene                                  | 20.312551  | - | - | - | 33.71925 | 219.175396 |
| NEG08129 | 926205.5003 | 398666.102  | -1.21615 | 0.26043  | 0.6904 | 0.60015 | 2-O-Galloyl-1,4-galactarolactone methyl ester                            | -10.955506 | - | - | - | 33.716   | 357.243199 |
| NEG08130 | 198466.7653 | 193982.7779 | -0.03297 | 0.924739 | 0.9754 | 0.05129 | Biochanin A-beta-D-glucoside                                             | 17.171903  | - | - | - | 33.716   | 445.404489 |
| NEG08131 | 89439.41488 | 84970.02251 | -0.07396 | 0.772394 | 0.9224 | 0.02729 | 7-Epiloganin tetraacetate                                                | -12.745381 | - | - | - | 33.6845  | 557.514705 |
| NEG08141 | 100602.6558 | 82974.23423 | -0.27793 | 0.137468 | 0.6023 | 0.14823 | 2-Iodophenol methyl ether                                                | 1.18475    | - | - | - | 33.5369  | 233.027401 |
| NEG08142 | 492420.3006 | 271036.56   | -0.8614  | 0.088291 | 0.5472 | 0.5712  | thymidine 3'-monophosphate                                               | 18.494584  | - | - | - | 33.5369  | 319.193645 |
| NEG08144 | 749293.3908 | 255905.7608 | -1.54992 | 0.41366  | 0.762  | 0.75512 | Protocatechoylphloroglucinol                                             | -8.3658178 | - | - | - | 33.531   | 305.214562 |
| NEG08146 | 207611.6265 | 346502.1675 | 0.738977 | 0.174024 | 0.6335 | 0.39367 | TG(15:0/20:2n6/24:1(15Z))                                                | -24.779154 | - | - | - | 33.49585 | 954.557045 |
| NEG08152 | 1388149.383 | 2184649.454 | 0.654239 | 0.189093 | 0.6466 | 0.92906 | TG(22:2(13Z,16Z)/15:0/22:2(13Z,16Z))                                     | 10.212098  | - | - | - | 33.45865 | 952.551561 |
| NEG08156 | 255282.4585 | 248440.4645 | -0.03919 | 0.819166 | 0.9375 | 0.05295 | Cefuroxime sodium                                                        | 19.076129  | - | - | - | 33.45485 | 445.368338 |
| NEG08159 | 200828.7858 | 200146.4238 | -0.00491 | 0.992375 | 0.9983 | 0.00167 | 2-Iodophenol                                                             | -16.934549 | - | - | - | 33.4377  | 218.996798 |
| NEG08161 | 56302.48989 | 44865.32409 | -0.3276  | 0.084116 | 0.5411 | 0.13116 | 5'-Deoxy-5'-fluoroadenosine                                              | 10.3208    | - | - | - | 33.4265  | 268.227902 |

|          |             |             |          |          |        |         |                                                                                     |            |   |   |   |          |            |
|----------|-------------|-------------|----------|----------|--------|---------|-------------------------------------------------------------------------------------|------------|---|---|---|----------|------------|
| NEG08162 | 162853.3359 | 128820.8815 | -0.33821 | 0.245685 | 0.6842 | 0.18088 | Carboxy-3-hydroxy-3-methylbutanoic acid                                             | -9.7063967 | - | - | - | 33.4156  | 607.488417 |
| NEG08171 | 980054.3732 | 858706.6626 | -0.1907  | 0.094234 | 0.5568 | 0.42967 | 7-O-Phosphohygroscopicin                                                            | -12.252694 | - | - | - | 33.3749  | 606.48528  |
| NEG08174 | 169410.4655 | 161664.867  | -0.06752 | 0.735465 | 0.9109 | 0.04079 | Myricatin                                                                           | -0.7621566 | - | - | - | 33.36535 | 551.410302 |
| NEG08177 | 198281.8892 | 192164.102  | -0.04521 | 0.816012 | 0.9364 | 0.00929 | Nitrosylhaem                                                                        | 15.26976   | - | - | - | 33.3567  | 645.495595 |
| NEG08179 | 372108.7359 | 339991.6937 | -0.13022 | 0.636659 | 0.8666 | 0.09526 | Isosorbide dinitrate                                                                | 19.161764  | - | - | - | 33.3163  | 235.133548 |
| NEG08182 | 1911361.804 | 1837387.317 | -0.05695 | 0.731261 | 0.9083 | 0.22956 | 6-((3,4-dihydroxy-5-methyl-5-oxooxan-2-yl)-5-hydroxy-2,4-dihydroxy-2                | -17.154674 | - | - | - | 33.3113  | 619.498079 |
| NEG08185 | 445014.0704 | 512365.0832 | 0.203321 | 0.623601 | 0.8594 | 0.13883 | L-Histidinol phosphate                                                              | 13.25333   | - | - | - | 33.2851  | 220.146554 |
| NEG08186 | 46584.03675 | 29771.33355 | -0.64591 | 0.066684 | 0.5151 | 0.13784 | Taxiphyllin                                                                         | -15.994255 | - | - | - | 33.2828  | 310.275045 |
| NEG08191 | 290271.5274 | 568626.3387 | 0.970078 | 0.146134 | 0.6127 | 0.46288 | Dopaxanthin                                                                         | 13.431026  | - | - | - | 33.2658  | 389.342066 |
| NEG08192 | 49510.58944 | 86552.69414 | 0.805842 | 0.15894  | 0.6214 | 0.20371 | 3,28-Dinexadecanoyl 20(29)-lupene-2a,3b,28-                                         | 7.6064951  | - | - | - | 33.2658  | 934.53364  |
| NEG08206 | 36100.1376  | 63639.81464 | 0.817925 | 0.283371 | 0.7021 | 0.15924 | TG(14:0/20:3(5Z,8Z,11Z)/24:1(15Z))                                                  | -4.6753799 | - | - | - | 33.15765 | 938.533331 |
| NEG08210 | 192443.5132 | 163515.208  | -0.23501 | 0.128939 | 0.5925 | 0.18144 | D-Glucosamine 6-phosphate                                                           | -4.5966957 | - | - | - | 33.1235  | 258.142532 |
| NEG08216 | 85713.93606 | 78559.36924 | -0.12575 | 0.536247 | 0.8236 | 0.07366 | 3,4,5-trihydroxy-6-((2-oxo-3-(2,3,4,5-tetrahydroxyphenyl)hexano-                    | -22.163898 | - | - | - | 33.1061  | 403.263763 |
| NEG08223 | 168595.2208 | 108063.0079 | -0.64169 | 0.017454 | 0.3284 | 0.28642 | Ascorbyl epigallocatechin                                                           | 9.4726956  | - | - | - | 33.08995 | 631.478715 |
| NEG08224 | 87205.64    | 99709.79023 | 0.193314 | 0.616093 | 0.8567 | 0.09886 | Chondroitin 4-sulfate                                                               | -12.927055 | - | - | - | 33.08745 | 474.365578 |
| NEG08232 | 260057.4962 | 247474.0575 | -0.07155 | 0.919302 | 0.9738 | 0.03704 | 4-(4-Deoxy-beta-D-gluc-4-enuronosyl)-D-galacturonic acid                            | -24.236422 | - | - | - | 33.0684  | 351.232386 |
| NEG08239 | 368431.9315 | 400192.071  | 0.119294 | 0.743388 | 0.9124 | 0.14846 | Chicoric acid                                                                       | -1.2030289 | - | - | - | 33.0185  | 473.363253 |
| NEG08245 | 400170.0154 | 454589.9532 | 0.183953 | 0.7804   | 0.9255 | 0.10973 | Fosaprepitant                                                                       | -16.069612 | - | - | - | 32.9843  | 613.38945  |
| NEG08248 | 1547099.185 | 1371500.805 | -0.17381 | 0.564835 | 0.8334 | 0.34127 | L-Selenocysteine                                                                    | 0.6226419  | - | - | - | 32.97105 | 167.046028 |
| NEG08249 | 55982.29283 | 46750.33403 | -0.25999 | 0.257271 | 0.6897 | 0.11084 | Triacetolehin                                                                       | -21.53096  | - | - | - | 32.9707  | 571.494497 |
| NEG08253 | 102850.3856 | 83441.34832 | -0.30171 | 0.452152 | 0.7814 | 0.13673 | 3,4,5-trihydroxy-6-((2,3,4,5-trihydroxy-6-((2-(2-hydroxypropanoate)oxy)-3-oxo-8,17- | 9.6910334  | - | - | - | 32.9262  | 599.524543 |
| NEG08256 | 575588.0567 | 572790.0019 | -0.00703 | 0.951846 | 0.9842 | 0.0288  | 3,4,5-trihydroxy-7-O-oxo-8,17-                                                      | 16.89517   | - | - | - | 32.89195 | 459.347501 |
| NEG08266 | 166190.2639 | 157595.4775 | -0.07661 | 0.7289   | 0.9081 | 0.04217 | 3,5,7-trihydroxy-5H-phenanthrene                                                    | 23.796405  | - | - | - | 32.7885  | 446.375369 |

|          |             |             |          |          |        |         |                                                                                                |            |   |   |   |          |            |
|----------|-------------|-------------|----------|----------|--------|---------|------------------------------------------------------------------------------------------------|------------|---|---|---|----------|------------|
| NEG08273 | 58417.10805 | 40317.12819 | -0.535   | 0.005576 | 0.2114 | 0.17677 | Cefonicid sodium                                                                               | -21.801417 | - | - | - | 32.7829  | 585.509536 |
| NEG08275 | 380583.2252 | 346967.5828 | -0.13341 | 0.468608 | 0.7893 | 0.12446 | Quercetin 3,3'-bisulfate                                                                       | 19.266626  | - | - | - | 32.7712  | 461.363732 |
| NEG08279 | 370605.5875 | 375872.2708 | 0.020358 | 0.888641 | 0.9626 | 0.03168 | (4S,5S)-4,5-dihydroxy-3-methoxyphenylpropanoic acid                                            | -0.6320806 | - | - | - | 32.7394  | 443.352443 |
| NEG08282 | 75019.66262 | 49535.92743 | -0.59879 | 0.065494 | 0.5111 | 0.17741 | O-Hexanoyl-adenosine monophosphate                                                             | -1.9341627 | - | - | - | 32.7001  | 444.356062 |
| NEG08289 | 400945.8468 | 86163.25582 | -2.21826 | 0.311362 | 0.7182 | 0.62666 | Phenyl 5-phospho-alpha-D-ribofuranoside                                                        | -9.2229866 | - | - | - | 32.5875  | 305.195699 |
| NEG08297 | 306052.9218 | 336374.5867 | 0.136288 | 0.617983 | 0.8569 | 0.13483 | 3,4,5-trimethoxy-1,1',18'-trimethoxy-12,13,6,8,9,20-hydroxy-11,17,18-trimethoxy-12,13,6,8,9,20 | -4.0020978 | - | - | - | 32.56145 | 575.453416 |
| NEG08309 | 66830.82784 | 45334.00392 | -0.55992 | 0.041202 | 0.44   | 0.15769 | Leiocarposide                                                                                  | -2.8084358 | - | - | - | 32.449   | 613.540297 |
| NEG08311 | 837703.9436 | 500890.5129 | -0.74195 | 0.554376 | 0.83   | 0.32524 | S-(1,2-Dichlorovinyl)glutathione                                                               | 11.479833  | - | - | - | 32.4422  | 401.248241 |
| NEG08314 | 33231.79249 | 45831.60172 | 0.463779 | 0.3215   | 0.7192 | 0.10178 | TG(14:0/24:1(15Z)/0-18:0)                                                                      | 2.0795839  | - | - | - | 32.4249  | 902.550602 |
| NEG08317 | 69600.03238 | 83663.2287  | 0.265506 | 0.425157 | 0.7674 | 0.08331 | N-Desmethyl vandetanib                                                                         | 20.692168  | - | - | - | 32.3552  | 460.329269 |
| NEG08318 | 694003.9661 | 584613.1656 | -0.24746 | 0.047586 | 0.4627 | 0.37525 | Manniflavanone                                                                                 | -19.696646 | - | - | - | 32.3518  | 589.468993 |
| NEG08321 | 115227.7133 | 85988.48599 | -0.42227 | 0.345699 | 0.7309 | 0.18196 | Nitrosylhaem                                                                                   | -20.495322 | - | - | - | 32.3037  | 645.472473 |
| NEG08322 | 436349.2348 | 374746.7272 | -0.21957 | 0.40729  | 0.7587 | 0.25781 | Z-(2R,5Z)-2-carboxy-4-methylthiazol-5(2H)-olidanalethyl phosphate                              | -17.45104  | - | - | - | 32.3023  | 266.184261 |
| NEG08335 | 2419380.728 | 1195155.358 | -1.01744 | 0.082565 | 0.5402 | 1.2407  | Iodide                                                                                         | 21.594617  | - | - | - | 32.1486  | 125.899964 |
| NEG08340 | 873663.4509 | 872056.4078 | -0.00266 | 0.981976 | 0.9949 | 0.06079 | p-Chloromercuribenzoate                                                                        | 11.357633  | - | - | - | 32.1142  | 356.15318  |
| NEG08341 | 165763.5548 | 173272.6224 | 0.063917 | 0.834456 | 0.9453 | 0.03916 | Luteolin 4'-glucoside 7-galacturonide                                                          | -8.3420769 | - | - | - | 32.10285 | 623.488514 |
| NEG08349 | 549755.676  | 315615.4019 | -0.80062 | 0.306221 | 0.7152 | 0.43706 | Chlorambucil                                                                                   | -18.073984 | - | - | - | 32.0485  | 303.199425 |
| NEG08350 | 271623.7742 | 319807.6068 | 0.235594 | 0.544736 | 0.8272 | 0.16221 | Quercetin 5-O-beta-D-glucosyl-(1->2)-beta-cyamidin 3'-O-beta-D-glucuronosyl)-beta-D-glucoside  | -8.5882321 | - | - | - | 32.0485  | 625.504243 |
| NEG08355 | 50557.18948 | 50498.13795 | -0.00169 | 0.997205 | 0.999  | 0.00924 | D-glucuronosyl)-beta-D-glucoside                                                               | -15.357723 | - | - | - | 32.00175 | 624.492117 |
| NEG08356 | 625514.2509 | 647703.7217 | 0.050291 | 0.892681 | 0.9637 | 0.14648 | Chrysoeriol 4',7-diglucuronide                                                                 | 24.857563  | - | - | - | 31.9972  | 651.520043 |
| NEG08357 | 94292.456   | 105552.0462 | 0.16274  | 0.708967 | 0.9015 | 0.06258 | Delphinidin 3-O-sophoroside                                                                    | -14.977872 | - | - | - | 31.994   | 626.508124 |
| NEG08358 | 115255.2586 | 128637.1104 | 0.158474 | 0.621208 | 0.8589 | 0.11313 | Bisnorbadioquinone A                                                                           | 20.619052  | - | - | - | 31.994   | 649.504436 |
| NEG08359 | 105935.5035 | 115816.1672 | 0.12865  | 0.702725 | 0.8994 | 0.07209 | Luteolin                                                                                       | -23.678039 | - | - | - | 31.98785 | 285.222246 |



|          |             |             |          |          |        |         |                                                                   |            |   |   |   |          |            |
|----------|-------------|-------------|----------|----------|--------|---------|-------------------------------------------------------------------|------------|---|---|---|----------|------------|
| NEG08487 | 25869596.4  | 2173450.52  | -3.5732  | 0.105864 | 0.5677 | 5.87721 | DCI                                                               | -18.196865 | - | - | - | 29.98505 | 247.137108 |
| NEG08490 | 230726.1931 | 207878.0461 | -0.15044 | 0.725481 | 0.9063 | 0.07466 | Cyanidin 3-(6'-O-malonyl)-bis(3-chlorobenzoate)                   | 24.601733  | - | - | - | 29.9735  | 592.432323 |
| NEG08500 | 137836.31   | 143738.7877 | 0.060493 | 0.787478 | 0.9273 | 0.00203 | Bisphenol A bis(chloroformate)                                    | -5.6872326 | - | - | - | 29.7982  | 352.187415 |
| NEG08504 | 132259.9531 | 82403.6382  | -0.6826  | 0.320655 | 0.7192 | 0.15428 | IDP                                                               | 0.548069   | - | - | - | 29.7799  | 427.178858 |
| NEG08505 | 67305.27714 | 46317.55352 | -0.53916 | 0.095209 | 0.5568 | 0.16604 | Saprisartan                                                       | -2.7213055 | - | - | - | 29.7755  | 610.42206  |
| NEG08509 | 1409898.05  | 3431765.186 | 1.28336  | 0.003304 | 0.1574 | 1.93783 | Procymidone                                                       | 22.601561  | - | - | - | 29.61945 | 283.137045 |
| NEG08510 | 497880.5767 | 1454441.65  | 1.546594 | 0.000643 | 0.0947 | 1.38435 | Chlorobenzilate                                                   | -24.312763 | - | - | - | 29.61945 | 324.171417 |
| NEG08513 | 80717.96644 | 52100.45578 | -0.63159 | 0.070296 | 0.5226 | 0.19834 | 3-Oxopropionyl-CoA                                                | -21.662398 | - | - | - | 29.50045 | 836.555479 |
| NEG08516 | 2651835.704 | 7621567.264 | 1.523096 | 0.000684 | 0.0947 | 3.16787 | 5-O-(1-Carboxyvinyl)-3-phosphohikimate                            | -7.9448952 | - | - | - | 29.4716  | 323.168148 |
| NEG08518 | 65663.62103 | 233313.4205 | 1.829103 | 0.000887 | 0.0947 | 0.56107 | N-Acetyl-D-glucosamine 1,6-bisphosphate                           | -3.3971422 | - | - | - | 29.4496  | 380.159029 |
| NEG08521 | 1088938.456 | 1054508.498 | -0.04635 | 0.663939 | 0.8791 | 0.12364 | Kamycin A 3'-phosphate                                            | -16.597102 | - | - | - | 29.4477  | 563.461855 |
| NEG08523 | 223747.5995 | 300473.0525 | 0.425363 | 0.709721 | 0.9015 | 0.07261 | Hypericin                                                         | 20.533474  | - | - | - | 29.4423  | 503.446281 |
| NEG08524 | 57890.99906 | 52164.54593 | -0.15027 | 0.874685 | 0.9576 | 0.04101 | Medicarpin 3-O-glucoside-6'-malonate                              | 4.5012982  | - | - | - | 29.4423  | 517.461757 |
| NEG08526 | 603775.2078 | 547228.2583 | -0.14187 | 0.239915 | 0.6822 | 0.23344 | Cyanidin 3-(6'-O-succinyl)-bis(3-chlorobenzoate)                  | -13.941157 | - | - | - | 29.4386  | 548.442663 |
| NEG08527 | 1934587.18  | 1746399.213 | -0.14764 | 0.196338 | 0.6557 | 0.47215 | (6'-O-succinyl)-O-(6'-O-malonyl)-cyanidin 3-bis(3-chlorobenzoate) | -5.3099589 | - | - | - | 29.4282  | 547.439511 |
| NEG08530 | 133618.9693 | 40339.96533 | -1.72784 | 0.002876 | 0.1473 | 0.41455 | Cyhexatin                                                         | -22.313022 | - | - | - | 29.35605 | 384.156129 |
| NEG08533 | 46097.53491 | 76397.99297 | 0.728845 | 0.656116 | 0.8753 | 0.05709 | Chlorhexidine                                                     | 20.915809  | - | - | - | 29.312   | 504.449895 |
| NEG08538 | 200035.5532 | 152815.6971 | -0.38846 | 0.147434 | 0.6145 | 0.2353  | N-Acetyl-N6,O6-didemethylpuromycin-5'-phosphate                   | -18.657691 | - | - | - | 29.26915 | 564.455173 |
| NEG08545 | 162852.4077 | 135722.3643 | -0.26291 | 0.460432 | 0.7836 | 0.1722  | 3-oxobrimonidine                                                  | -17.397926 | - | - | - | 29.1512  | 309.137327 |
| NEG08547 | 654245.374  | 424526.4134 | -0.62398 | 0.241804 | 0.6822 | 0.47915 | Methazole                                                         | 8.4150785  | - | - | - | 29.1512  | 260.05642  |
| NEG08549 | 29239.49846 | 88731.37677 | 1.601526 | 0.001159 | 0.0993 | 0.31723 | Sedoheptulose 1,7-bisphosphate                                    | -20.045552 | - | - | - | 29.1289  | 369.127004 |
| NEG08550 | 99284.31204 | 112623.6139 | 0.181872 | 0.590324 | 0.8429 | 0.10936 | Quinacridone                                                      | 16.204936  | - | - | - | 29.1248  | 311.319285 |
| NEG08557 | 86380.16151 | 47203.53253 | -0.87181 | 0.015058 | 0.3098 | 0.26707 | CMP-N-glycoloyl-beta-neuraminate(2-)                              | -17.108149 | - | - | - | 29.1145  | 627.419972 |



|          |             |             |          |          |        |         |                                                                                                                                                                                    |            |   |   |   |          |            |
|----------|-------------|-------------|----------|----------|--------|---------|------------------------------------------------------------------------------------------------------------------------------------------------------------------------------------|------------|---|---|---|----------|------------|
| NEG08559 | 325408.723  | 1211059.246 | 1.895945 | 0.000572 | 0.0947 | 1.33906 | 1-(5-phospho-L-ribose)-5-amino-4-imidazolecarboxylate                                                                                                                              | -3.0803021 | - | - | - | 29.08515 | 338.187579 |
| NEG08560 | 1895793.333 | 6165263.165 | 1.701361 | 0.001082 | 0.0968 | 2.91136 | Azafenidin                                                                                                                                                                         | 7.4656553  | - | - | - | 29.0596  | 337.183848 |
| NEG08581 | 54712.46875 | 16407.15014 | -1.73754 | 0.023717 | 0.3593 | 0.24935 | 3-Iodo-L-tyrosine                                                                                                                                                                  | 24.439747  | - | - | - | 28.8051  | 306.085328 |
| NEG08584 | 2431169.497 | 10568999.76 | 2.120116 | 0.000606 | 0.0947 | 4.07203 | Eudistomin G                                                                                                                                                                       | 5.0792024  | - | - | - | 28.8008  | 313.174219 |
| NEG08610 | 167829.2663 | 192234.004  | 0.195869 | 0.703154 | 0.8994 | 0.00751 | (2S,3S,5S)-3,5-bisphosphoribosyl-L-phenylalanine                                                                                                                                   | -19.836395 | - | - | - | 28.492   | 633.475937 |
| NEG08613 | 175858.3844 | 838499.6539 | 2.253396 | 0.000754 | 0.0947 | 1.15062 | 3,5-bisphosphoribosyl-L-phenylalanine                                                                                                                                              | -18.404981 | - | - | - | 28.4818  | 328.192564 |
| NEG08617 | 56486.89932 | 386033.076  | 2.772736 | 0.000695 | 0.0947 | 0.81011 | 3-hydroxyguanfacine glucuronide                                                                                                                                                    | -6.0288984 | - | - | - | 28.4716  | 453.205985 |
| NEG08618 | 2799449.052 | 11094864.78 | 1.986677 | 0.000875 | 0.0947 | 4.08933 | Fluorodifen                                                                                                                                                                        | -9.8272009 | - | - | - | 28.4705  | 327.189798 |
| NEG08625 | 69312.97609 | 410086.8789 | 2.564732 | 0.000972 | 0.0947 | 0.83922 | 3,5-bisphosphoribosyl-L-phenylalanine                                                                                                                                              | 8.4013223  | - | - | - | 28.4694  | 329.186197 |
| NEG08626 | 141986983.8 | 561944944.5 | 1.98467  | 0.000815 | 0.0947 | 29.0832 | Dioxotetrahydropyrimidin-2(1H)-one                                                                                                                                                 | -18.872593 | - | - | - | 28.4689  | 325.183767 |
| NEG08628 | 5746092.945 | 23158626.25 | 2.010896 | 0.000888 | 0.0947 | 5.91478 | Etacozole                                                                                                                                                                          | -21.274559 | - | - | - | 28.4689  | 327.179541 |
| NEG08629 | 1520319.774 | 1561040.559 | 0.038133 | 0.771011 | 0.9221 | 0.00965 | Manniflavanone                                                                                                                                                                     | 9.4740562  | - | - | - | 28.4689  | 589.486218 |
| NEG08631 | 666573.7794 | 560695.0776 | -0.24955 | 0.54821  | 0.8287 | 0.21404 | Carfentrazone-ethyl                                                                                                                                                                | -0.2252737 | - | - | - | 28.4684  | 411.183831 |
| NEG08633 | 131276.8472 | 136262.9437 | 0.053781 | 0.885679 | 0.961  | 0.00793 | 5,4,5-trihydroxy-6-oxo-1,2-dihydro-4-(3,5,6,7-tetrahydro-4-oxo-1H-imidazo[5,4-d]pyrimidin-2(1H)-one)-1,2-dihydro-4-(3,5,6,7-tetrahydro-4-oxo-1H-imidazo[5,4-d]pyrimidin-2(1H)-one) | 3.351991   | - | - | - | 28.4655  | 493.35538  |
| NEG08639 | 487144.4792 | 408476.3593 | -0.2541  | 0.624489 | 0.8594 | 0.27101 | Alginic acid                                                                                                                                                                       | -24.716765 | - | - | - | 28.4317  | 417.209886 |
| NEG08645 | 234556.0015 | 516183.692  | 1.137952 | 0.348794 | 0.732  | 0.43874 | 3,5-Di-O-galloyl-1,4-galactarolactone                                                                                                                                              | -21.763065 | - | - | - | 28.3633  | 495.313922 |
| NEG08651 | 281093.5683 | 224447.0148 | -0.32468 | 0.730121 | 0.9083 | 0.05365 | Molybdopterin precursor Z                                                                                                                                                          | 3.8206667  | - | - | - | 28.31595 | 343.191438 |
| NEG08655 | 1417324.379 | 923208.9658 | -0.61844 | 0.212378 | 0.6634 | 0.83403 | Gamma-Glutamyl-Semethylselenocysteine                                                                                                                                              | -18.476379 | - | - | - | 28.2157  | 310.176974 |
| NEG08657 | 175623.4843 | 450572.7023 | 1.359274 | 0.151107 | 0.6145 | 0.51954 | 1-(5-phosphoribosyl)-5-formamide A                                                                                                                                                 | 1.7450926  | - | - | - | 28.2023  | 365.214662 |
| NEG08658 | 205149.6004 | 626164.7974 | 1.609866 | 0.008182 | 0.2511 | 0.8807  | Triazolam                                                                                                                                                                          | 15.949716  | - | - | - | 28.1796  | 342.208198 |
| NEG08659 | 27147.96128 | 92513.40781 | 1.768819 | 0.001354 | 0.1079 | 0.34217 | Adenosine 5-phosphate disodium                                                                                                                                                     | -14.782313 | - | - | - | 28.1796  | 390.171841 |
| NEG08660 | 2105879.633 | 8334610.528 | 1.984692 | 0.001832 | 0.1169 | 3.48382 | Propicozole                                                                                                                                                                        | -22.349512 | - | - | - | 28.163   | 341.205475 |
| NEG08662 | 101038275.6 | 391403817.7 | 1.953756 | 0.001588 | 0.1127 | 23.8497 | Etobenzanid                                                                                                                                                                        | 15.661582  | - | - | - | 28.1585  | 339.199251 |

|          |             |             |          |          |        |         |                                                                                                                                        |            |   |   |   |          |            |
|----------|-------------|-------------|----------|----------|--------|---------|----------------------------------------------------------------------------------------------------------------------------------------|------------|---|---|---|----------|------------|
| NEG08665 | 818604.6189 | 3254264.674 | 1.991093 | 0.001567 | 0.1127 | 2.18634 | Boscalid                                                                                                                               | -2.9309088 | - | - | - | 28.1585  | 342.198417 |
| NEG08673 | 174089.7902 | 125793.7889 | -0.46877 | 0.237539 | 0.6801 | 0.24447 | Bromobenzene-2,3-dihydrodiol                                                                                                           | -4.5684148 | - | - | - | 28.14285 | 190.014451 |
| NEG08677 | 9880919.571 | 6245473.985 | -0.66183 | 0.180228 | 0.6397 | 2.30295 | Tricalcium phosphate                                                                                                                   | 14.21979   | - | - | - | 28.02935 | 309.173834 |
| NEG08685 | 221334.2722 | 769605.2604 | 1.797892 | 0.075978 | 0.5279 | 0.85168 | Urate D-ribonucleotide                                                                                                                 | -15.684557 | - | - | - | 27.93675 | 379.19156  |
| NEG08687 | 305859.5273 | 34581.178   | -3.14481 | 0.073689 | 0.5234 | 0.64421 | Sanguisorbic acid dilactone                                                                                                            | -12.608905 | - | - | - | 27.93055 | 469.283093 |
| NEG08691 | 702484.9048 | 680561.951  | -0.04574 | 0.77458  | 0.9234 | 0.11905 | 3,4,5-trimethoxy-0-(1S)-hydroxy-2-(3-(4-hydroxyphenyl)propyl)-5-(4-hydroxyphenyl)-2,3,4,5-tetrahydro-2H-pyridin-2-one                  | 9.1396777  | - | - | - | 27.88225 | 577.477011 |
| NEG08703 | 145205.0815 | 96742.70878 | -0.58587 | 0.012532 | 0.2923 | 0.28621 | Bis(4-chlorophenyl)acetate                                                                                                             | 11.983133  | - | - | - | 27.8181  | 280.130092 |
| NEG08708 | 492649.4149 | 470818.0713 | -0.06539 | 0.691622 | 0.8929 | 0.13388 | Emblicanin A                                                                                                                           | -6.4620361 | - | - | - | 27.8041  | 781.512967 |
| NEG08709 | 12387562.64 | 13950566.6  | 0.171431 | 0.349465 | 0.7322 | 0.69329 | Hydroiodic acid                                                                                                                        | -1.6279761 | - | - | - | 27.801   | 126.904915 |
| NEG08716 | 1750340.89  | 395232.9987 | -2.14686 | 0.083688 | 0.5411 | 1.47571 | 8-Hydroxy-3,4-dichlorodibenzofuran                                                                                                     | -2.2078196 | - | - | - | 27.6801  | 252.072965 |
| NEG08717 | 112167.5608 | 65610.72067 | -0.77365 | 0.02024  | 0.3444 | 0.27965 | 3,4,5-trimethoxy-0-(1S)-hydroxy-2-(3-(4-hydroxyphenyl)propyl)-5-(4-hydroxyphenyl)-2,3,4,5-tetrahydro-2H-pyridin-2-one                  | -13.163826 | - | - | - | 27.64595 | 578.472095 |
| NEG08724 | 1297298.631 | 1198554.34  | -0.11422 | 0.25839  | 0.6898 | 0.26911 | Amaranth                                                                                                                               | 0.5141595  | - | - | - | 27.5376  | 603.466034 |
| NEG08726 | 6520888.789 | 5718319.763 | -0.18948 | 0.276872 | 0.6995 | 0.94099 | 1,1-Dichloro-2,2-diphenylethane                                                                                                        | 2.8067696  | - | - | - | 27.527   | 250.144528 |
| NEG08732 | 166542.1009 | 57443.80806 | -1.53566 | 0.000948 | 0.0947 | 0.45751 | 3,4,5-trimethoxy-0-((6,7,11,12,13,21,22,23-tetrahydro-2H-pyridin-2-ylideneamino)ethyl)-(4-hydroxyphenyl)ethyl]-1-methoxy-N             | 11.132911  | - | - | - | 27.487   | 657.474054 |
| NEG08735 | 66615.65762 | 525099.2494 | 2.978657 | 0.135368 | 0.5997 | 0.74235 | (4-hydroxyphenyl)ethyl]-1-methoxy-N                                                                                                    | 13.795649  | - | - | - | 27.4275  | 379.231069 |
| NEG08736 | 4798474.434 | 2790088.332 | -0.78227 | 0.146579 | 0.6131 | 1.64887 | Phosphoribosyl)-5-amino-4-imidazolecarboxamide                                                                                         | 3.4811412  | - | - | - | 27.38525 | 337.205101 |
| NEG08740 | 90629.1209  | 276104.8314 | 1.60717  | 0.327682 | 0.721  | 0.36692 | UK-47265                                                                                                                               | -2.4676441 | - | - | - | 27.23875 | 338.171886 |
| NEG08743 | 154094.102  | 116769.6455 | -0.40015 | 0.203616 | 0.6615 | 0.18796 | a-L-Arabinouranosyl-(1->2)-[a-D-mannopyranosyl (1->6)]-b-D-Galactopyranoside                                                           | -2.1605872 | - | - | - | 27.21655 | 473.402798 |
| NEG08746 | 83027.26106 | 117658.8807 | 0.502953 | 0.16181  | 0.6225 | 0.2043  | Thiamphenicol                                                                                                                          | -12.769255 | - | - | - | 27.1927  | 355.210375 |
| NEG08749 | 2169110.668 | 1647956.774 | -0.39643 | 0.287153 | 0.7037 | 0.73707 | Cacodylate                                                                                                                             | 7.2856028  | - | - | - | 27.18465 | 136.991129 |
| NEG08753 | 3329753.045 | 1111641.145 | -1.58272 | 0.147878 | 0.6145 | 1.80069 | 5-Amino-0-(3-phosphoribosylamino)uracil                                                                                                | -9.9377782 | - | - | - | 27.163   | 353.199803 |
| NEG08755 | 777244.6561 | 541598.3266 | -0.52115 | 0.081737 | 0.5377 | 0.61212 | 3,4,5-trimethoxy-0-(11-hydroxy-17,18-dimethoxy-1,2,3,4-tetrahydro-2H-pyridin-2-ylideneamino)ethyl)-(4-hydroxyphenyl)ethyl]-1-methoxy-N | -9.9093811 | - | - | - | 27.163   | 545.424309 |
| NEG08756 | 511357.6877 | 452196.7908 | -0.17738 | 0.267289 | 0.6945 | 0.24586 | 3,4,5-trimethoxy-0-(11-hydroxy-17,18-dimethoxy-1,2,3,4-tetrahydro-2H-pyridin-2-ylideneamino)ethyl)-(4-hydroxyphenyl)ethyl]-1-methoxy-N | -4.2293309 | - | - | - | 27.1606  | 604.467963 |

|          |             |             |          |          |        |         |                                                                        |            |   |   |   |          |            |
|----------|-------------|-------------|----------|----------|--------|---------|------------------------------------------------------------------------|------------|---|---|---|----------|------------|
| NEG08759 | 988718.6439 | 1008569.221 | 0.028678 | 0.873088 | 0.9572 | 0.04321 | 2,8-bis-Trifluoromethyl-4-quinoline carboxylic acid                    | 15.264375  | - | - | - | 27.0274  | 308.161443 |
| NEG08760 | 153922.4524 | 87065.68869 | -0.82203 | 0.331175 | 0.7231 | 0.27132 | D-Amino-D-phospho-D-ribitol                                            | 6.0346371  | - | - | - | 27.0126  | 355.221273 |
| NEG08765 | 1712606.568 | 509763.5397 | -1.74829 | 0.10607  | 0.5677 | 1.30403 | dehydrofelodipine                                                      | 1.0147657  | - | - | - | 26.9132  | 381.231111 |
| NEG08767 | 722863.4299 | 635123.8485 | -0.18669 | 0.16719  | 0.6281 | 0.34592 | 1-(1-(2,3,4-dihydroxyphenyl)-5,7-dihydroxy-2,4-dihydro-                | -17.85902  | - | - | - | 26.9     | 617.481678 |
| NEG08770 | 866170.7311 | 705858.9327 | -0.29527 | 0.178592 | 0.638  | 0.43975 | Cycloprothrin                                                          | -24.64241  | - | - | - | 26.8855  | 481.336037 |
| NEG08777 | 168480.2644 | 102411.6557 | -0.7182  | 0.031957 | 0.4009 | 0.30283 | Eriodictyol 7-(6-galloylglucoside)                                     | -5.55798   | - | - | - | 26.8532  | 601.486375 |
| NEG08782 | 562190.6244 | 116605.575  | -2.26942 | 0.088266 | 0.5472 | 0.83833 | WIN56291                                                               | -15.051758 | - | - | - | 26.8361  | 354.203177 |
| NEG08786 | 186291.41   | 83246.85724 | -1.16209 | 0.000299 | 0.0947 | 0.47507 | Transfluthrin                                                          | -9.0602185 | - | - | - | 26.8264  | 370.143561 |
| NEG08787 | 1012927.706 | 692638.1086 | -0.54836 | 0.46136  | 0.7838 | 0.51451 | Isopentenyladenosine-5'-diphosphate                                    | -17.78832  | - | - | - | 26.8092  | 494.302013 |
| NEG08788 | 224269.237  | 164185.5278 | -0.4499  | 0.063079 | 0.5039 | 0.27319 | 1-Kaempferol-6-(6-galloylglucoside)                                    | -4.7413368 | - | - | - | 26.79975 | 599.471076 |
| NEG08794 | 1083462.183 | 925866.3556 | -0.22677 | 0.128539 | 0.5925 | 0.49837 | 3-Phosphonooxypyruvate                                                 | -24.076321 | - | - | - | 26.7078  | 183.029692 |
| NEG08795 | 52425.17617 | 33926.27119 | -0.62786 | 0.072533 | 0.5226 | 0.16912 | 1-Caffeoyl-5-feruloylquinic acid                                       | -9.2544374 | - | - | - | 26.6856  | 529.465214 |
| NEG08801 | 126670.4863 | 72201.22042 | -0.81099 | 0.017017 | 0.3231 | 0.323   | 11-[(6-carboxy-3,4,5-trihydroxyoxan-2-yl)oxy]-5,4-dihydro-3-hydroxy-4- | 3.5512408  | - | - | - | 26.5486  | 532.411618 |
| NEG08809 | 9330148.971 | 10268763.04 | 0.13829  | 0.502496 | 0.8038 | 0.61619 | S-glutathionyl homocysteine                                            | -8.4775364 | - | - | - | 26.52395 | 479.319451 |
| NEG08812 | 388447.3111 | 372987.8143 | -0.05859 | 0.767419 | 0.9216 | 0.10525 | Phenobenzuron                                                          | -1.9843579 | - | - | - | 26.5181  | 336.192654 |
| NEG08814 | 327816.4233 | 110165.4982 | -1.57322 | 0.26967  | 0.6959 | 0.53362 | Chloramben                                                             | -23.252533 | - | - | - | 26.5178  | 205.014033 |
| NEG08815 | 1722554.258 | 1579581.117 | -0.12501 | 0.39542  | 0.7526 | 0.32669 | 12-nyaroxyl-(3,5,6-trihydroxy-4-oxo-7-(1,2,4,5-trihydroxy-6-           | 12.156714  | - | - | - | 26.5178  | 559.439537 |
| NEG08816 | 2853434.567 | 3103169.063 | 0.121043 | 0.566771 | 0.8343 | 0.27188 | T 0901317                                                              | -5.5019409 | - | - | - | 26.51195 | 480.322775 |
| NEG08817 | 255446.9533 | 183646.8432 | -0.47609 | 0.083837 | 0.5411 | 0.31514 | Karakin                                                                | 15.713089  | - | - | - | 26.5061  | 482.338618 |
| NEG08823 | 191431.4051 | 101286.0562 | -0.91839 | 0.007126 | 0.2376 | 0.41074 | Carmustine                                                             | -11.125908 | - | - | - | 26.4731  | 213.040242 |
| NEG08829 | 5047992.39  | 3800511.709 | -0.40952 | 0.192195 | 0.65   | 1.36164 | 4,4'-Methylene-bis-(2-chloroaniline)                                   | 17.289223  | - | - | - | 26.4098  | 266.151142 |
| NEG08832 | 4574827.296 | 4716169.846 | 0.043898 | 0.808262 | 0.9344 | 0.11414 | L-Threonylcarbamoyladenyl                                              | -15.959949 | - | - | - | 26.3801  | 491.319466 |
| NEG08834 | 98704.35235 | 140756.338  | 0.512014 | 0.555714 | 0.83   | 0.13875 | 5,4,3-trihydroxy-6-(3,4,8,9,10-pentahydroxy-6-oxo-6H-                  | 12.808609  | - | - | - | 26.3471  | 495.332081 |

|          |             |             |          |          |        |         |                                                                       |            |   |   |   |          |            |
|----------|-------------|-------------|----------|----------|--------|---------|-----------------------------------------------------------------------|------------|---|---|---|----------|------------|
| NEG08839 | 97139.35879 | 1030533.944 | 3.407192 | 0.339431 | 0.7277 | 0.82266 | N-Adenylylanthranilate                                                | 10.018528  | - | - | - | 26.2665  | 465.339295 |
| NEG08841 | 1284135.834 | 1179328.866 | -0.12283 | 0.284511 | 0.7021 | 0.27166 | Fucofuroeckol B                                                       | 14.865245  | - | - | - | 26.2665  | 477.361234 |
| NEG08842 | 734520.2374 | 573270.4006 | -0.35759 | 0.06347  | 0.5039 | 0.50348 | Tetrahydroxy-6,7-<br>methylansoxy A&apos;                             | -12.164699 | - | - | - | 26.2631  | 535.382098 |
| NEG08854 | 52873.32488 | 71974.11136 | 0.444938 | 0.469411 | 0.7895 | 0.09196 | Thiamine(1+)<br>Diphosphate(1-)                                       | -13.53316  | - | - | - | 26.2211  | 423.292981 |
| NEG08856 | 43982.90405 | 17054.33107 | -1.3668  | 0.004796 | 0.1938 | 0.21929 | Cyclochlorotine                                                       | 15.483304  | - | - | - | 26.20015 | 571.439787 |
| NEG08861 | 128635.7696 | 115997.5936 | -0.1492  | 0.789451 | 0.9279 | 0.05505 | (2,3-<br>Dihydroxybenzoyl)adenyl                                      | 0.5565303  | - | - | - | 26.1751  | 482.319092 |
| NEG08862 | 126783.2224 | 69543.60771 | -0.86637 | 0.033607 | 0.405  | 0.27436 | 3&apos;&apos;6&apos;&apos;<br>Heme                                    | -20.889509 | - | - | - | 26.1694  | 620.456941 |
| NEG08864 | 110400.4806 | 58079.82733 | -0.92664 | 0.002464 | 0.1319 | 0.29369 | Heme                                                                  | -23.322302 | - | - | - | 26.1569  | 615.465645 |
| NEG08865 | 157164.4185 | 93324.25999 | -0.75195 | 0.086178 | 0.5433 | 0.32772 | L-Selenocystathionine                                                 | -10.341811 | - | - | - | 26.14575 | 268.14704  |
| NEG08870 | 58881865.32 | 56289858.5  | -0.06495 | 0.703737 | 0.8994 | 1.72892 | Potassium dichromate                                                  | 5.6740763  | - | - | - | 26.142   | 293.178993 |
| NEG08873 | 711155.4505 | 644169.9653 | -0.14272 | 0.489515 | 0.7998 | 0.28771 | (K)-4&apos;-<br>phosphonatopantothenate(                              | -5.2340562 | - | - | - | 26.1285  | 295.184173 |
| NEG08875 | 8602056.738 | 8241314.591 | -0.06181 | 0.716058 | 0.9036 | 0.63751 | Aminoimidazole ribotide                                               | 10.536901  | - | - | - | 26.124   | 294.182234 |
| NEG08876 | 341899.2657 | 277228.8761 | -0.30249 | 0.032155 | 0.4009 | 0.28656 | (6-carboxy-3,4,5-<br>trihydroxyoxan-2-yl)[2-<br>(2,4-Dihydroxyphenyl) | 6.1136946  | - | - | - | 26.0823  | 478.364654 |
| NEG08878 | 338375.8405 | 276463.028  | -0.29154 | 0.21931  | 0.6677 | 0.29475 | Enilcozole                                                            | 18.03123   | - | - | - | 26.04255 | 296.177882 |
| NEG08879 | 2037407.67  | 1922095.835 | -0.08405 | 0.506286 | 0.8064 | 0.30712 | Metaflumizone                                                         | 0.1478252  | - | - | - | 26.04255 | 505.392698 |
| NEG08881 | 158014.511  | 112490.6662 | -0.49025 | 0.052462 | 0.4813 | 0.24036 | Gossypetin 8-glucuronide<br>3-sulfate                                 | 7.0682103  | - | - | - | 26.0289  | 573.418784 |
| NEG08882 | 7545416.254 | 2187147.717 | -1.78655 | 0.076248 | 0.5279 | 2.44799 | Diclofenac acyl<br>glucuronide                                        | 18.832519  | - | - | - | 26.0207  | 471.274617 |
| NEG08884 | 105799.0812 | 138297.2007 | 0.386445 | 0.445971 | 0.7779 | 0.15226 | 3,3&apos;-Biflaviolin                                                 | -6.6594692 | - | - | - | 25.95625 | 409.277391 |
| NEG08890 | 201670.2921 | 67677.87216 | -1.57524 | 0.018368 | 0.3337 | 0.44825 | Isoimide                                                              | -22.147619 | - | - | - | 25.93085 | 305.140543 |
| NEG08893 | 617681.1981 | 498766.7209 | -0.3085  | 0.121284 | 0.5846 | 0.39063 | Polyoxin B                                                            | -5.9747525 | - | - | - | 25.9067  | 506.395792 |
| NEG08897 | 190368.0781 | 141827.3627 | -0.42466 | 0.075463 | 0.5272 | 0.27688 | 1-O,2-O,6-O-Trigalloyl-<br>beta-D-glucose                             | 20.829553  | - | - | - | 25.88625 | 635.474681 |
| NEG08900 | 131152.6171 | 135035.4548 | 0.042092 | 0.893171 | 0.9639 | 0.03188 | L-2-Aminoadipate<br>adenylate                                         | 13.552896  | - | - | - | 25.8745  | 489.361169 |
| NEG08905 | 20197287.54 | 20208571.78 | 0.000806 | 0.995921 | 0.9988 | 0.42758 | CGH 2466                                                              | 15.528081  | - | - | - | 25.8516  | 321.210127 |

|          |             |             |          |          |        |         |                                                                                                                                                                                                                                                                 |            |   |   |   |          |            |
|----------|-------------|-------------|----------|----------|--------|---------|-----------------------------------------------------------------------------------------------------------------------------------------------------------------------------------------------------------------------------------------------------------------|------------|---|---|---|----------|------------|
| NEG08915 | 47302.96763 | 16996.07109 | -1.47673 | 0.001801 | 0.1158 | 0.23277 | 5&apos;-<br>Phosphoribosylglycimide                                                                                                                                                                                                                             | -20.696615 | - | - | - | 25.7903  | 285.163201 |
| NEG08918 | 1418103.021 | 1331861.55  | -0.09052 | 0.513378 | 0.811  | 0.21372 | Luteoin /-U-<br>(6&apos;&apos;-<br>melonylbenzoate)                                                                                                                                                                                                             | 15.029565  | - | - | - | 25.75895 | 533.423856 |
| NEG08919 | 885478.1014 | 669105.8791 | -0.40422 | 0.012813 | 0.2932 | 0.60482 | dCMP                                                                                                                                                                                                                                                            | -9.9629822 | - | - | - | 25.7416  | 306.186763 |
| NEG08920 | 1157397.603 | 685434.8759 | -0.75579 | 0.055841 | 0.4884 | 0.73669 | Fosetyl                                                                                                                                                                                                                                                         | -8.5068836 | - | - | - | 25.7276  | 109.040687 |
| NEG08922 | 452649.9429 | 342964.1291 | -0.40034 | 0.018395 | 0.3337 | 0.39039 | 5&apos;&apos;-<br>Phosphoribosylparomamin                                                                                                                                                                                                                       | -5.3540515 | - | - | - | 25.70655 | 534.427157 |
| NEG08923 | 115921.1336 | 100149.1847 | -0.21099 | 0.264696 | 0.6928 | 0.11541 | 6-[3,4-dimethoxy-5-(5,4,5-<br>trihydroxybenzoyloxy)ben-<br>zoyloxy]-2,4,5                                                                                                                                                                                       | -23.540599 | - | - | - | 25.6865  | 497.329992 |
| NEG08929 | 664811.3123 | 457237.7302 | -0.54    | 0.00952  | 0.2615 | 0.57062 | Tiron                                                                                                                                                                                                                                                           | 3.0425372  | - | - | - | 25.5907  | 313.194379 |
| NEG08936 | 58360.93751 | 52680.74336 | -0.14773 | 0.596641 | 0.8463 | 0.06028 | Adenosine thiamine<br>diphosphate                                                                                                                                                                                                                               | 16.464265  | - | - | - | 25.5795  | 673.543829 |
| NEG08938 | 235906.9199 | 217477.5031 | -0.11735 | 0.562166 | 0.8325 | 0.09944 | Dantrolene sodium<br>anhydrous                                                                                                                                                                                                                                  | -5.4397756 | - | - | - | 25.5772  | 335.225694 |
| NEG08939 | 127241.5837 | 101560.6168 | -0.32523 | 0.102458 | 0.5639 | 0.14457 | U-(1-&gt;4)-alpha-L-<br>Dihydrostreptosyl-<br>streptidine 6 phosphate                                                                                                                                                                                           | 3.719353   | - | - | - | 25.5602  | 487.38194  |
| NEG08940 | 107624.9509 | 85659.27175 | -0.32933 | 0.260646 | 0.6904 | 0.13485 | Carumom sodium                                                                                                                                                                                                                                                  | 11.807361  | - | - | - | 25.54515 | 509.366149 |
| NEG08941 | 119846.0731 | 164460.7923 | 0.456561 | 0.560971 | 0.8325 | 0.16923 | 3-Iodothyronamine                                                                                                                                                                                                                                               | -14.063272 | - | - | - | 25.5321  | 354.158629 |
| NEG08945 | 283500.3824 | 216216.5734 | -0.39087 | 0.136434 | 0.6016 | 0.26225 | 6-([2,4-dimethoxy-5-(4-<br>hydroxy-3-<br>sulfoxyphenyl)-4-oxo-<br>6-hydroxyluteolin 6-oxo-<br>xyloside                                                                                                                                                          | 20.364151  | - | - | - | 25.5056  | 557.424095 |
| NEG08951 | 602757.9244 | 498094.4066 | -0.27516 | 0.136187 | 0.6016 | 0.33646 | 6-Hydroxyluteolin 6-<br>xyloside                                                                                                                                                                                                                                | -18.544895 | - | - | - | 25.4484  | 433.334968 |
| NEG08952 | 284075.7789 | 227950.5501 | -0.31755 | 0.301617 | 0.7148 | 0.19322 | 2-U-1,2-U-(alpha-L-<br>Mannopyranosyl)-alpha-<br>D-glucopyranosyl 2                                                                                                                                                                                             | -2.4339834 | - | - | - | 25.4484  | 509.329881 |
| NEG08959 | 118333.5734 | 80217.43934 | -0.56087 | 0.066803 | 0.5151 | 0.24529 | Hexaflurate                                                                                                                                                                                                                                                     | -4.8754701 | - | - | - | 25.3656  | 227.001912 |
| NEG08961 | 49969.90324 | 42673.02127 | -0.22774 | 0.488169 | 0.7991 | 0.07801 | (1S)-[2-([2,4-dimethoxy-2-<br>(4-hydroxyphenyl)-4-oxo-<br>4H-chroman-3-yl]oxy)-                                                                                                                                                                                 | -21.432764 | - | - | - | 25.3656  | 659.528566 |
| NEG08964 | 146519.5948 | 159087.7829 | 0.118729 | 0.885922 | 0.961  | 0.01624 | Griseorhodin A                                                                                                                                                                                                                                                  | 13.018267  | - | - | - | 25.34    | 507.386642 |
| NEG08965 | 359211.5362 | 329406.7101 | -0.12496 | 0.405694 | 0.7584 | 0.16366 | 1,4&apos;-<br>Diacetylchitobiose                                                                                                                                                                                                                                | 8.2543983  | - | - | - | 25.31495 | 503.377087 |
| NEG08986 | 623373.9536 | 449942.9806 | -0.47036 | 0.182031 | 0.6415 | 0.41743 | 5,4,5-trimethoxy-6-([6-1,3-<br>(4-methoxy-1-benzofuran-<br>5-yl)-2-[[2-(3,4,5-<br>trihydroxyphenyl)-5,7-<br>11-[[6-carboxy-3,4,5-<br>trihydroxyoxan-2-yl]oxy]-<br>6-hydroxy-2-pyridone-1,7-<br>diacetyl]oxy]oxy]oxy]oxy-<br>(6&apos;&apos;-p-<br>hydroxybenzoyl | -3.2874775 | - | - | - | 25.17355 | 529.42898  |
| NEG08991 | 827159.1112 | 703713.7213 | -0.23318 | 0.194087 | 0.6519 | 0.33666 | dihydroxyphenyl)-5,7-<br>11-[[6-carboxy-3,4,5-<br>trihydroxyoxan-2-yl]oxy]-<br>6-hydroxy-2-pyridone-1,7-<br>diacetyl]oxy]oxy]oxy-<br>(6&apos;&apos;-p-<br>hydroxybenzoyl                                                                                        | -18.283793 | - | - | - | 25.09165 | 515.413281 |
| NEG08992 | 229893.2224 | 196862.8614 | -0.22377 | 0.244579 | 0.6836 | 0.15369 | 5,4,5-trimethoxy-6-([6-1,3-<br>(4-methoxy-1-benzofuran-<br>5-yl)-2-[[2-(3,4,5-<br>trihydroxyphenyl)-5,7-<br>11-[[6-carboxy-3,4,5-<br>trihydroxyoxan-2-yl]oxy]-<br>6-hydroxy-2-pyridone-1,7-<br>diacetyl]oxy]oxy]oxy-<br>(6&apos;&apos;-p-<br>hydroxybenzoyl     | 11.417562  | - | - | - | 25.0674  | 516.416631 |
| NEG08996 | 614864.6787 | 463371.7466 | -0.4081  | 0.052185 | 0.4813 | 0.45028 | (6&apos;&apos;-p-<br>hydroxybenzoyl                                                                                                                                                                                                                             | -16.425114 | - | - | - | 25.02935 | 543.444781 |



|          |             |             |          |          |        |         |                                                                                                              |            |   |   |   |          |            |
|----------|-------------|-------------|----------|----------|--------|---------|--------------------------------------------------------------------------------------------------------------|------------|---|---|---|----------|------------|
| NEG09090 | 199604.5713 | 163697.7604 | -0.28611 | 0.174562 | 0.6336 | 0.19113 | Prunin 6&apos;&apos;-O-gallate                                                                               | 2.2723894  | - | - | - | 23.95485 | 585.491656 |
| NEG09091 | 63946.9545  | 56951.76027 | -0.16714 | 0.47606  | 0.7932 | 0.06086 | (1,3,4,5-trihydroxy-6-[3,5,7-trihydroxy-2-(2,4,5-tris(1,2,3,4,5-trihydroxy-1,3,1&apos;-phosphate 1-phosphate | 6.246611   | - | - | - | 23.93225 | 547.466149 |
| NEG09093 | 365977.7071 | 87344.59618 | -2.06697 | 0.116378 | 0.5761 | 0.53152 | Celecoxib glucuronide                                                                                        | 0.1476464  | - | - | - | 23.9048  | 501.249098 |
| NEG09098 | 54622.00714 | 36390.1343  | -0.58593 | 0.013184 | 0.2953 | 0.17414 | Phosphonoacetaldehyde                                                                                        | 3.2975791  | - | - | - | 23.8882  | 558.463568 |
| NEG09107 | 975659.0092 | 1037888.766 | 0.089203 | 0.693229 | 0.8938 | 0.0593  | 2,3-Diketone-2-methylthiopentyl-1-phosphate                                                                  | 2.8721359  | - | - | - | 23.67505 | 123.02558  |
| NEG09109 | 590380.8885 | 850171.5961 | 0.526108 | 0.074877 | 0.5262 | 0.56254 | Lead arsete                                                                                                  | 4.8903426  | - | - | - | 23.634   | 241.180608 |
| NEG09123 | 220858.9771 | 233019.6123 | 0.077326 | 0.800088 | 0.9311 | 0.02136 | 2,4,5-trihydroxy-3-(3-hydroxy-4-(sulfooxy)-5-(2,4,5-4&apos;-O-Demethylrebeccamycin                           | 1.6340307  | - | - | - | 23.45755 | 346.120391 |
| NEG09126 | 381343.0117 | 333821.3389 | -0.19201 | 0.391783 | 0.7513 | 0.14418 | Adenylselete                                                                                                 | 8.3669964  | - | - | - | 23.4435  | 569.387496 |
| NEG09127 | 33639.14202 | 51625.86557 | 0.617953 | 0.403727 | 0.7578 | 0.09956 | 2-(formamido)-N1-(5&apos;-phosphoribosyl)acetamidi                                                           | -15.233912 | - | - | - | 23.3727  | 555.335248 |
| NEG09131 | 711423.5522 | 105239.6348 | -2.75703 | 0.134955 | 0.5997 | 0.73915 | IACI                                                                                                         | 19.013352  | - | - | - | 23.3329  | 473.181139 |
| NEG09132 | 132273.7318 | 192790.6073 | 0.543508 | 0.549834 | 0.8291 | 0.1647  | Ubiquinone-8                                                                                                 | -24.121446 | - | - | - | 23.2919  | 312.186869 |
| NEG09136 | 350742.0473 | 329371.6515 | -0.09069 | 0.832678 | 0.9447 | 0.01426 | CMP-N-acetyl-beta-neuraminat(2-)(alpha,1 / alpha,2,3)-17,23-Epoxy-3,29-dihydroxy-27-norlanosta               | -15.567973 | - | - | - | 23.21245 | 597.418807 |
| NEG09138 | 411206.5877 | 418030.1034 | 0.023743 | 0.907158 | 0.9697 | 0.06292 | Decachlorobiphenyl                                                                                           | 1.3726581  | - | - | - | 23.19515 | 726.103221 |
| NEG09139 | 93496.24524 | 90265.54919 | -0.05073 | 0.905861 | 0.9697 | 0.01291 | Fexofedine                                                                                                   | 4.5200193  | - | - | - | 23.1938  | 611.434492 |
| NEG09142 | 386742.3483 | 470691.7745 | 0.28341  | 0.187332 | 0.6466 | 0.24657 | TG(10:0/10:0/18:0)                                                                                           | 24.711047  | - | - | - | 23.18495 | 469.645153 |
| NEG09143 | 411799.0163 | 475221.0409 | 0.206658 | 0.318966 | 0.7192 | 0.1799  | 2-Octaprenyl-6-methoxyphenol                                                                                 | -5.0044436 | - | - | - | 23.1824  | 497.648628 |
| NEG09144 | 183426.4048 | 223608.0932 | 0.285771 | 0.208743 | 0.6619 | 0.16276 | Triamcinolone hexacetoneide                                                                                  | -10.414217 | - | - | - | 23.1824  | 500.643899 |
| NEG09145 | 1537650.452 | 4720441.261 | 1.618194 | 0.221092 | 0.6692 | 1.81204 | (geranylgeranyl)-sn-glycero-1,3&apos;-Dideoxyadenosine-5-3,4,5-trihydroxy-6-(1,3-hydroxy-2-methyl-6-(2,4,5   | -3.7653726 | - | - | - | 23.1824  | 666.059212 |
| NEG09146 | 180498.501  | 591458.9401 | 1.712291 | 0.234275 | 0.6785 | 0.64586 | 2-Octaprenyl-6-methoxyphenol                                                                                 | -3.9964336 | - | - | - | 23.1824  | 668.063449 |
| NEG09149 | 708358.3088 | 846405.9515 | 0.25687  | 0.151523 | 0.6145 | 0.32766 | Triamcinolone hexacetoneide                                                                                  | 7.894041   | - | - | - | 23.1773  | 531.637628 |
| NEG09151 | 1           | 13216.56397 | 13.69006 | 0.327312 | 0.721  | 0.10977 | (geranylgeranyl)-sn-glycero-1,3&apos;-Dideoxyadenosine-5-3,4,5-trihydroxy-6-(1,3-hydroxy-2-methyl-6-(2,4,5   | -11.176062 | - | - | - | 23.17685 | 803.070937 |
| NEG09152 | 180238.3582 | 29528.07831 | -2.60975 | 0.166856 | 0.6281 | 0.35089 | Dideoxyadenosine-5-3,4,5-trihydroxy-6-(1,3-hydroxy-2-methyl-6-(2,4,5                                         | 20.352005  | - | - | - | 23.1757  | 474.184594 |
| NEG09156 | 176124.9449 | 255245.9467 | 0.535289 | 0.156741 | 0.6186 | 0.27389 | Decachlorobiphenyl                                                                                           | -15.156921 | - | - | - | 23.17445 | 647.546893 |

|          |             |             |          |          |        |         |                                                                                |            |   |   |   |          |            |
|----------|-------------|-------------|----------|----------|--------|---------|--------------------------------------------------------------------------------|------------|---|---|---|----------|------------|
| NEG09159 | 5342742.989 | 6376807.715 | 0.255254 | 0.127062 | 0.5923 | 0.93572 | Proscillaridin                                                                 | -1.1387559 | - | - | - | 23.16185 | 529.641819 |
| NEG09167 | 42127.12173 | 180289.9337 | 2.097498 | 0.198159 | 0.6561 | 0.38582 | DG(15:0/24:1(15Z)/0:0)                                                         | -17.514316 | - | - | - | 23.13135 | 664.062675 |
| NEG09169 | 44577.97867 | 69116.10151 | 0.632691 | 0.045102 | 0.45   | 0.17159 | Pfaffic acid                                                                   | -9.3349147 | - | - | - | 23.1018  | 439.64651  |
| NEG09170 | 26951.03979 | 55299.285   | 1.03692  | 0.12553  | 0.5916 | 0.15698 | N-(2R-Hydroxydocosanoyl)-2S-amine 1,3S,4D                                      | 10.287455  | - | - | - | 23.0913  | 655.074273 |
| NEG09173 | 73470.84754 | 98487.71415 | 0.422772 | 0.09335  | 0.5568 | 0.14825 | Scymnol                                                                        | -19.533486 | - | - | - | 23.0099  | 467.649969 |
| NEG09178 | 38759.51817 | 61232.6698  | 0.659751 | 0.126603 | 0.5923 | 0.14568 | beta-D-4-Deoxy-delta+GlcA-(1-&gt;4)-beta-D-Glc (1-&gt;4) alpha-D               | 19.040621  | - | - | - | 22.8913  | 645.551534 |
| NEG09180 | 86013.04205 | 109202.421  | 0.344378 | 0.154666 | 0.6173 | 0.13081 | LysoPE(0:0/22:4(7Z,10Z,13Z,16Z))                                               | 10.370541  | - | - | - | 22.8815  | 528.644516 |
| NEG09188 | 26028.78448 | 40632.78673 | 0.642536 | 0.06811  | 0.5182 | 0.12388 | (1-1alpha,2alpha)-Epoxy-28,29-dihydroxy-27-norbornene 3,24                     | -17.007212 | - | - | - | 22.7884  | 471.641385 |
| NEG09197 | 113980.3823 | 94320.8506  | -0.27314 | 0.126554 | 0.5923 | 0.15052 | 3&apos;,5&apos;-Cyclic CMP                                                     | -8.4743048 | - | - | - | 22.4901  | 304.171337 |
| NEG09204 | 163710.0682 | 341675.6434 | 1.061484 | 0.033108 | 0.4037 | 0.48586 | Dichlorophenolindopheno                                                        | 23.910076  | - | - | - | 22.3995  | 289.076959 |
| NEG09259 | 12034.68425 | 88420.59441 | 2.877184 | 0.081023 | 0.5377 | 0.28461 | Leadium salt                                                                   | 20.193432  | - | - | - | 22.0262  | 375.511226 |
| NEG09264 | 674311.4098 | 194531.0724 | -1.79341 | 0.128758 | 0.5925 | 0.79607 | Phytyl phosphate                                                               | 18.646149  | - | - | - | 21.95195 | 349.02335  |
| NEG09265 | 35761.50772 | 65580.80684 | 0.874866 | 0.065105 | 0.5103 | 0.18718 | 1,1-Dichloro-2-(dihydroxy-4&apos;-chlorophenyl)-2-(4&apos;-chlorophenyl)ethane | 16.173287  | - | - | - | 21.9248  | 313.567211 |
| NEG09274 | 233105.3547 | 213863.4239 | -0.12429 | 0.679793 | 0.8871 | 0.10808 | Dibenzyltetramethyldisiloxane                                                  | -18.628431 | - | - | - | 21.882   | 354.456702 |
| NEG09277 | 170115.8921 | 121881.4327 | -0.48104 | 0.181923 | 0.6415 | 0.24541 | Spirasine I                                                                    | 8.8251004  | - | - | - | 21.8737  | 348.526408 |
| NEG09284 | 823881.5355 | 1844821.498 | 1.162972 | 0.133847 | 0.5989 | 0.95838 | Cetiedil                                                                       | 18.138784  | - | - | - | 21.84765 | 367.513308 |
| NEG09286 | 338808.9111 | 515449.305  | 0.605359 | 0.200371 | 0.6584 | 0.36781 | 3,1-1imethyl-1-Tropyl-2-lurantridecanoic acid                                  | -3.4481833 | - | - | - | 21.84765 | 349.534515 |
| NEG09291 | 38355.61083 | 107528.191  | 1.487205 | 0.077247 | 0.5298 | 0.26831 | N-arachidonoylglycinate                                                        | -12.673672 | - | - | - | 21.83935 | 359.507154 |
| NEG09297 | 152645.7661 | 117272.7391 | -0.38032 | 0.025163 | 0.3609 | 0.22756 | 2,5,6-Tribromo-1-methylgramine                                                 | -12.279989 | - | - | - | 21.8309  | 423.944505 |
| NEG09299 | 179819.7659 | 279959.4054 | 0.638666 | 0.186091 | 0.6456 | 0.27651 | delta,11,14-Eicosatrienoylethanolamide                                         | -20.887889 | - | - | - | 21.8226  | 348.536022 |
| NEG09301 | 3489400.003 | 7955282.864 | 1.188934 | 0.125599 | 0.5916 | 2.0158  | Fentin hydroxide                                                               | -23.092944 | - | - | - | 21.82135 | 366.013248 |
| NEG09302 | 44851.54179 | 33260.2841  | -0.43136 | 0.043789 | 0.4467 | 0.12193 | Sulfinpyrazone                                                                 | -6.8834325 | - | - | - | 21.82135 | 403.471439 |
| NEG09308 | 225927.7728 | 201391.8784 | -0.16586 | 0.230751 | 0.6744 | 0.16497 | Cortisone acetate                                                              | 2.3816239  | - | - | - | 21.81355 | 401.474382 |



|          |             |             |          |          |        |         |                                                                                                                                                   |            |   |   |   |          |            |
|----------|-------------|-------------|----------|----------|--------|---------|---------------------------------------------------------------------------------------------------------------------------------------------------|------------|---|---|---|----------|------------|
| NEG09313 | 588988.0749 | 524032.2808 | -0.16858 | 0.191802 | 0.6491 | 0.27944 | Cloacinizine                                                                                                                                      | 21.109144  | - | - | - | 21.8042  | 401.97123  |
| NEG09315 | 225706.8588 | 200491.6476 | -0.17091 | 0.212506 | 0.6634 | 0.14862 | Perphezine                                                                                                                                        | 20.951257  | - | - | - | 21.7964  | 402.969787 |
| NEG09317 | 81379.68608 | 208998.5882 | 1.360753 | 0.139133 | 0.6058 | 0.33905 | 3-Oxo-4,6-choladienoic acid                                                                                                                       | -19.982374 | - | - | - | 21.79365 | 369.510319 |
| NEG09319 | 43271.50423 | 41599.18292 | -0.05686 | 0.854792 | 0.9527 | 0.02275 | Tangeraxanthin                                                                                                                                    | 4.9105611  | - | - | - | 21.792   | 483.707104 |
| NEG09323 | 28432.82039 | 86785.89987 | 1.609903 | 0.081184 | 0.5377 | 0.24572 | N-Arachidonoyl glycine                                                                                                                            | -14.610401 | - | - | - | 21.789   | 360.505641 |
| NEG09327 | 54677.83821 | 41754.99479 | -0.38901 | 0.035635 | 0.4191 | 0.13776 | Morusin                                                                                                                                           | 15.096513  | - | - | - | 21.7839  | 419.453571 |
| NEG09336 | 134420.078  | 128910.1585 | -0.06038 | 0.72114  | 0.9054 | 0.0414  | Fenchlorazole-ethyl                                                                                                                               | 10.821539  | - | - | - | 21.77975 | 402.47289  |
| NEG09348 | 871273.1375 | 1791335.521 | 1.039839 | 0.013573 | 0.3009 | 1.27795 | Arbutin 6-phosphate                                                                                                                               | -9.4072237 | - | - | - | 21.6948  | 351.22051  |
| NEG09352 | 1622983.329 | 1552321.936 | -0.06422 | 0.866449 | 0.9556 | 0.12821 | Dihydrogen phosphate                                                                                                                              | 2.4214612  | - | - | - | 21.63105 | 95.9801583 |
| NEG09354 | 48988.43379 | 36879.36349 | -0.40963 | 0.124591 | 0.5902 | 0.11443 | {[1-(4-nyaroxypneny)-3-(5-methoxy-2,2-dimethyl-2H-chroman-6-yl)propanoic acid]}                                                                   | 9.2857681  | - | - | - | 21.6149  | 417.456609 |
| NEG09362 | 48006.8221  | 41963.87286 | -0.19409 | 0.367891 | 0.7404 | 0.07748 | N-Desmethyldiltiazem                                                                                                                              | -15.7763   | - | - | - | 21.4334  | 399.477405 |
| NEG09372 | 873523.737  | 813941.2468 | -0.10192 | 0.284553 | 0.7021 | 0.29057 | 3-Phospho-D-erythrote                                                                                                                             | -21.742085 | - | - | - | 20.4103  | 215.071225 |
| NEG09376 | 3189732.47  | 2766810.663 | -0.20521 | 0.130211 | 0.5933 | 0.73335 | Tetrafluoroethylene                                                                                                                               | -13.65956  | - | - | - | 20.1904  | 99.0063572 |
| NEG09416 | 1956457.846 | 1846480.122 | -0.08347 | 0.694843 | 0.8944 | 0.20591 | Bowdichione                                                                                                                                       | 12.034196  | - | - | - | 18.08015 | 297.243313 |
| NEG09418 | 566835.7538 | 421812.44   | -0.42633 | 0.024845 | 0.3595 | 0.43926 | 2-Bromoacetaldehyde                                                                                                                               | 22.018136  | - | - | - | 17.9127  | 121.94403  |
| NEG09422 | 1024559.823 | 997483.1066 | -0.03864 | 0.624754 | 0.8594 | 0.15273 | Arsenobetaine                                                                                                                                     | 9.7080902  | - | - | - | 17.9086  | 177.055652 |
| NEG09423 | 15028546.03 | 12632742.09 | -0.25054 | 0.409677 | 0.7602 | 1.40595 | Nitrogen mustard                                                                                                                                  | -2.0878033 | - | - | - | 17.8799  | 155.045898 |
| NEG09449 | 550414.0363 | 357922.9165 | -0.62087 | 0.024851 | 0.3595 | 0.48963 | (beta-1-O-[N-(2-hydroxymethyl-3-(4-methoxyphenyl)-2-oxo-1-phenylethoxy)-2-(2-chloro-2-hydroxy-2-methylbutanoyloxy)]-2-phenylethyl)phosphonic acid | -5.9407342 | - | - | - | 15.4705  | 452.817027 |
| NEG09451 | 122056.0067 | 100657.212  | -0.27809 | 0.15297  | 0.6159 | 0.16936 | 1,3-Dichloro-2-propanol                                                                                                                           | 1.6312461  | - | - | - | 15.1025  | 415.886403 |
| NEG09455 | 1358936.238 | 1299158.137 | -0.0649  | 0.458378 | 0.7822 | 0.23094 | 1,3-Dichloro-2-propanol                                                                                                                           | 2.7552853  | - | - | - | 14.23965 | 127.978179 |
| NEG09456 | 594169.7832 | 692110.9307 | 0.220128 | 0.175229 | 0.6342 | 0.25109 | Bromobenzene                                                                                                                                      | 4.2283295  | - | - | - | 13.833   | 156.001287 |
| NEG09462 | 1896675.723 | 5260165.476 | 1.471635 | 0.008643 | 0.2551 | 2.37556 | 2-Phosphoglycolate                                                                                                                                | -19.884991 | - | - | - | 11.9767  | 155.020921 |
| NEG09477 | 463076.2138 | 648337.073  | 0.485494 | 0.050935 | 0.4769 | 0.49959 | 2,5-Di(2-methylthiopentyl-1-phosphato)pentane                                                                                                     | 4.2048792  | - | - | - | 9.64508  | 241.180442 |

|          |             |             |          |          |        |         |                                                              |                                                                         |                                                        |                               |          |          |          |            |            |
|----------|-------------|-------------|----------|----------|--------|---------|--------------------------------------------------------------|-------------------------------------------------------------------------|--------------------------------------------------------|-------------------------------|----------|----------|----------|------------|------------|
| NEG09490 | 5578482.881 | 3643373.461 | -0.6146  | 0.007169 | 0.2376 | 1.74809 |                                                              | (1S,5R)-5-(2,2-dichloroethenyl)-2,2-dimethylcyclopropanecarboxylic acid | 0.9999999                                              | Organic acids and derivatives | -        | -        | -        | 8.3116     | 208.061372 |
| NEG09494 | 5289346.07  | 5659596.371 | 0.09761  | 0.729945 | 0.9083 | 0.2224  |                                                              | Tetrafluoroethylene                                                     | 0.9999999                                              | Organic nitrogen compounds    | -        | -        | -        | 7.998145   | 99.0063543 |
| NEG09501 | 3512918.333 | 3521448.678 | 0.003499 | 0.993547 | 0.9985 | 0.01806 |                                                              | Dihydrogen phosphate                                                    | 0.9999999                                              | Organic nitrogen compounds    | -        | -        | -        | 7.65741    | 95.9801524 |
| NEG09521 | 1952303.372 | 2082520.444 | 0.093153 | 0.526992 | 0.8177 | 0.19376 |                                                              | Cacodylate                                                              | 0.9999999                                              | Organic nitrogen compounds    | -        | -        | -        | 5.644645   | 136.991159 |
| NEG09522 | 564549.9418 | 586695.3407 | 0.05551  | 0.867903 | 0.9556 | 0.00499 |                                                              | 3,4-Dihydroxymandelate                                                  | 0.9999999                                              | Organic acids and derivatives | -        | -        | -        | 5.623635   | 183.138813 |
| NEG09524 | 1182200.241 | 1126148.568 | -0.07008 | 0.821332 | 0.939  | 0.08666 |                                                              | Bowdichione                                                             | 0.9999999                                              | Organic acids and derivatives | -        | -        | -        | 5.40977    | 297.24325  |
| NEG09545 | 271991.4102 | 256074.105  | -0.087   | 0.458736 | 0.7822 | 0.1175  |                                                              | Nifurthiazole                                                           | 0.9999999                                              | Organic nitrogen compounds    | -        | -        | -        | 4.2527     | 253.217388 |
| NEG09552 | 503047.6055 | 590827.0555 | 0.232041 | 0.356837 | 0.7348 | 0.175   |                                                              | Arbutin 6-phosphate                                                     | 0.9999999                                              | Organic nitrogen compounds    | -        | -        | -        | 3.885485   | 351.220534 |
| NEG09555 | 635279.7076 | 622972.4245 | -0.02822 | 0.742465 | 0.9121 | 0.11346 |                                                              | Phenolic phosphate                                                      | 0.9999999                                              | Organic acids and derivatives | -        | -        | -        | 3.770875   | 173.082003 |
| NEG09566 | 1075713.473 | 1130364.747 | 0.071495 | 0.569097 | 0.8352 | 0.05849 |                                                              | Fosetyl                                                                 | 0.9999999                                              | Organic acids and derivatives | -        | -        | -        | 1.827055   | 109.040698 |
| NEG09571 | 2307015.021 | 2456523.882 | 0.090591 | 0.766086 | 0.9214 | 0.05788 |                                                              | sn-Glycerol 3-phosphate                                                 | 0.9999999                                              | Organic acids and derivatives | -        | -        | -        | 1.78894    | 171.066894 |
| POS00001 | 644908.3471 | 514592.7478 | -0.32566 | 0.38399  | 0.6572 | 0.22385 | N,N-dimethylformamide                                        | 0.9999947                                                               | Organic acids and derivatives                          | -                             | -        | -        | 230.985  | 73.075899  |            |
| POS00002 | 14338402.53 | 7253692.19  | -0.9831  | 0.303586 | 0.6161 | 1.46325 | 2-methylpropan-1-amine                                       | 0.9999938                                                               | Organic nitrogen compounds                             | -                             | -        | -        | 676.616  | 75.0933961 |            |
| POS00003 | 7173846.365 | 3688727.582 | -0.95962 | 0.567302 | 0.7784 | 0.68219 | 1-Butylamine                                                 | 0.9999886                                                               | Organic nitrogen compounds                             | -                             | -        | -        | 4.901865 | 75.0934029 |            |
| POS00004 | 32970728.87 | 24533805.07 | -0.42641 | 0.032433 | 0.2773 | 2.4741  | (2R,3R,4S,5R)-2-(6-aminopurin-9-yl)-5-hydroxymethylimidazole | 0.9998521                                                               | Organic nitrogen compounds, nucleotides, and analogues | -                             | -        | -        | 166.103  | 268.103297 |            |
| POS00005 | 106678304.6 | 46461498.73 | -1.19916 | 0.169583 | 0.4962 | 6.13966 | hexan-1-amine                                                | 0.9998039                                                               | Organonitrogen compounds                               | -                             | -        | -        | 700.74   | 102.074182 |            |
| POS00006 | 772808.7147 | 528314.1012 | -0.54872 | 0.071374 | 0.3591 | 0.37549 | L-(trimethylazaniumyl)acetate                                | 0.9997555                                                               | Organic acids and derivatives                          | -                             | -        | -        | 257.2395 | 117.10204  |            |
| POS00007 | 3468671.722 | 2423027.843 | -0.51757 | 0.011092 | 0.1994 | 0.91598 | Nervonyl carnitine                                           | 0.9997231                                                               | Organic nitrogen compounds                             | -                             | -        | -        | 50.04845 | 103.075217 |            |
| POS00008 | 2225186.129 | 2354084.055 | 0.08124  | 0.748756 | 0.8819 | 0.1492  | Diethanolamine                                               | 0.9996509                                                               | Organic nitrogen compounds                             | C4H11NO2                      | 111-42-2 | 105.079  | 180.699  | 74.9307908 |            |
| POS00009 | 132964.5933 | 115886.9623 | -0.19832 | 0.593701 | 0.7927 | 0.05788 | Choline                                                      | 0.9995012                                                               | Organic nitrogen compounds                             | C5H13NO                       | 62-49-7  | 103.0997 | 254.315  | 104.070371 |            |
| POS00010 | 11415248.5  | 13207853.92 | 0.210434 | 0.652487 | 0.8291 | 0.5631  | 2-Pyrrolidinone                                              | 0.9992938                                                               | Organoheterocyclic compounds                           | -                             | -        | -        | 628.843  | 100.075521 |            |
| POS00011 | 87302.76893 | 79085.90128 | -0.14261 | 0.80222  | 0.9099 | 0.02475 | Palmitic amide                                               | 0.9989307                                                               | Lipids and lipid-like molecules                        | -                             | -        | -        | 36.11655 | 256.169084 |            |
| POS00012 | 62392004.79 | 62935802.74 | 0.01252  | 0.963809 | 0.983  | 0.40043 | 2-Methylpiperidine                                           | 0.9987425                                                               | Organoheterocyclic compounds                           | -                             | -        | -        | 620.1775 | 100.111877 |            |

|          |             |             |          |          |        |         |                                                            |           |                                 |        |          |          |          |            |
|----------|-------------|-------------|----------|----------|--------|---------|------------------------------------------------------------|-----------|---------------------------------|--------|----------|----------|----------|------------|
| POS00013 | 102559831   | 55778693.51 | -0.87868 | 0.021448 | 0.2438 | 5.97838 | 4-Hydroxybenzylamine                                       | 0.9978641 | Benzenoids                      | -      | -        | -        | 87.2392  | 124.075609 |
| POS00014 | 55409373.5  | 47753756.5  | -0.21452 | 0.345531 | 0.6343 | 1.70815 | 2-Propionylpyrrole                                         | 0.9969503 | Organooxygen compounds          | -      | -        | -        | 117.879  | 124.075614 |
| POS00015 | 4174068.255 | 3097210.979 | -0.43048 | 0.335922 | 0.6326 | 0.63104 | 1-Pyrroline                                                | 0.9963931 | Organoheterocyclic compounds    | -      | -        | -        | 126.61   | 70.0399824 |
| POS00016 | 7646750.157 | 5605337.239 | -0.44805 | 0.095967 | 0.4006 | 1.10856 | 2-Ethoxy-5-methylpyrazine                                  | 0.9958981 | Organooxygen compounds          | -      | -        | -        | 693.138  | 138.091232 |
| POS00017 | 791122.0282 | 657371.9363 | -0.26719 | 0.049049 | 0.3174 | 0.30096 | Pyrrolidinecarboxaldehyd                                   | 0.9953361 | Organoheterocyclic compounds    | -      | -        | -        | 36.47405 | 99.0804485 |
| POS00018 | 3847744.576 | 5374942.544 | 0.482236 | 0.367426 | 0.6468 | 0.53452 | (2S)-2-amino-3-(diaminomethylideneamino)propanoic acid     | 0.9950648 | Organic acids and derivatives   | -      | -        | -        | 521.0755 | 175.118732 |
| POS00019 | 5235913.216 | 4648655.773 | -0.17163 | 0.279831 | 0.5957 | 0.42865 | Fomepizole                                                 | 0.9949376 | Organoheterocyclic compounds    | -      | -        | -        | 53.2078  | 84.0443047 |
| POS00020 | 11748246.62 | 9808875.335 | -0.26029 | 0.078398 | 0.3727 | 1.05115 | Adenine                                                    | 0.9942853 | Organoheterocyclic compounds    | C5H5N5 | 73-24-5  | 135.0545 | 156.2455 | 136.061713 |
| POS00021 | 408579.5692 | 474758.4288 | 0.216577 | 0.656003 | 0.8308 | 0.03626 | 4-(ethyramino)-o-(propan-2-ylamino)-1H-1,3,5-triazin-2-one | 0.9941215 | Organoheterocyclic compounds    | -      | -        | -        | 110.45   | 198.079287 |
| POS00022 | 286610.4217 | 249196.102  | -0.20181 | 0.050224 | 0.3192 | 0.15099 | hydroxyethyl)dodecanamide                                  | 0.9939455 | Lipids and lipid-like molecules | -      | -        | -        | 128.4925 | 289.247672 |
| POS00023 | 802638.4615 | 454391.9015 | -0.82081 | 0.203486 | 0.5277 | 0.3634  | Lauroyl diethanolamide                                     | 0.9928565 | Lipids and lipid-like molecules | -      | -        | -        | 33.1754  | 288.268028 |
| POS00024 | 36427428.99 | 21561086.81 | -0.7566  | 0.065513 | 0.3476 | 3.00908 | 1-Ethyl-1H-pyrrole-2-carboxaldehyde                        | 0.9906681 | Organic oxygen compounds        | -      | -        | -        | 190.367  | 124.024219 |
| POS00025 | 130971033.8 | 62590128.09 | -1.06524 | 0.051863 | 0.3215 | 6.36168 | Triethylamine                                              | 0.9904337 | Organonitrogen compounds        | C6H15N | 121-44-8 | 101.1205 | 686.849  | 102.127574 |
| POS00026 | 510086.5244 | 401279.3136 | -0.34614 | 0.044364 | 0.3087 | 0.25102 | Acetaminophen                                              | 0.9889717 | Benzenoids                      | -      | -        | -        | 117.977  | 152.056564 |
| POS00027 | 199645.4504 | 154723.0643 | -0.36775 | 0.184956 | 0.5109 | 0.12693 | octadecanamide                                             | 0.9888915 | Lipids and lipid-like molecules | -      | -        | -        | 36.45775 | 283.921469 |
| POS00028 | 11955671.34 | 13085272.53 | 0.130249 | 0.480049 | 0.7237 | 0.55317 | 2-Ethoxy-6-methylpyrazine                                  | 0.9880665 | Organic oxygen compounds        | -      | -        | -        | 20.0215  | 139.086514 |
| POS00029 | 1903886.151 | 3341411.13  | 0.81151  | 0.143709 | 0.4682 | 0.89065 | 3-(diaminomethylidene)-1,1-dimethylguanidine               | 0.9867144 | Organic nitrogen compounds      | -      | -        | -        | 681.898  | 130.108645 |
| POS00030 | 23518420.95 | 30527804.39 | 0.376333 | 0.392762 | 0.662  | 1.77181 | (2R)-2-Hydroxy-2-methylbutanenitrile                       | 0.9857872 | Organic oxygen compounds        | -      | -        | -        | 152.213  | 100.075574 |
| POS00031 | 2063813.525 | 3092773.658 | 0.583589 | 0.477605 | 0.7223 | 0.47198 | alpha-Methylstyrene                                        | 0.9849798 | Benzenoids                      | -      | -        | -        | 36.7406  | 118.090205 |
| POS00032 | 11173739.97 | 8547816.254 | -0.38648 | 0.187705 | 0.5138 | 1.19824 | Proline betaine                                            | 0.9839025 | Organic acids and derivatives   | -      | -        | -        | 245.005  | 143.994567 |
| POS00033 | 1334822.543 | 4463774.318 | 1.741616 | 0.040329 | 0.2975 | 1.36541 | Gentiatibetine                                             | 0.9825724 | Organoheterocyclic compounds    | -      | -        | -        | 16.0994  | 165.09084  |
| POS00034 | 605753.3194 | 377312.0541 | -0.68297 | 0.040611 | 0.2986 | 0.3706  | 7H-purin-6-amine                                           | 0.9823222 | Organoheterocyclic compounds    | -      | -        | -        | 184.034  | 135.055359 |
| POS00035 | 8494305.775 | 7986657.411 | -0.0889  | 0.889525 | 0.9496 | 0.28606 | (2-furanyl)pyrrolidine                                     | 0.9822414 | Organic nitrogen compounds      | -      | -        | -        | 146.524  | 138.054915 |

|          |             |             |          |          |        |         |                                                                                |           |                                 |          |            |          |          |            |
|----------|-------------|-------------|----------|----------|--------|---------|--------------------------------------------------------------------------------|-----------|---------------------------------|----------|------------|----------|----------|------------|
| POS00036 | 6909133.903 | 6697979.17  | -0.04478 | 0.659639 | 0.8327 | 0.14901 | 2-Methylbutylamine                                                             | 0.9821789 | Organonitrogen compounds        | -        | -          | -        | 177.351  | 88.1119193 |
| POS00037 | 151393.9803 | 140464.7538 | -0.1081  | 0.408315 | 0.6733 | 0.05613 | 2-aminooctadecane-1,3-diol                                                     | 0.9784768 | Organic nitrogen compounds      | -        | -          | -        | 26.9983  | 302.148879 |
| POS00038 | 6545182.508 | 5659510.166 | -0.20976 | 0.59372  | 0.7927 | 0.31777 | 2-Acetyl-1-methylpyrrole                                                       | 0.9776084 | Organooxygen compounds          | -        | -          | -        | 681.408  | 123.099679 |
| POS00039 | 155748.61   | 142294.1522 | -0.13034 | 0.791719 | 0.9039 | 0.02516 | (2R,3S,4S,5R,6S)-2-(hydroxymethyl)-6-[4-(E)-3-hydroxyprop-1-en-1-yl]hexan-1-ol | 0.9767774 | Organooxygen compounds          | -        | -          | -        | 34.8453  | 364.232248 |
| POS00040 | 8597230.395 | 7978880.638 | -0.10769 | 0.769896 | 0.8937 | 0.2492  | 2-Diethylaminoethanol                                                          | 0.9759037 | Organic nitrogen compounds      | -        | -          | -        | 619.54   | 118.122435 |
| POS00041 | 26581852.04 | 20112101.19 | -0.40238 | 0.568025 | 0.7785 | 0.79781 | 2-Piperidinone                                                                 | 0.9757187 | Organoheterocyclic compounds    | -        | -          | -        | 16.834   | 100.075553 |
| POS00042 | 11313151.69 | 6507896.61  | -0.79774 | 0.086622 | 0.3863 | 1.69669 | 2-phenylethanamine                                                             | 0.9752192 | Benzenoids                      | -        | -          | -        | 16.2023  | 122.0963   |
| POS00043 | 17329522.54 | 12804247.53 | -0.43661 | 0.591608 | 0.7918 | 1.16027 | Metenamine                                                                     | 0.9750107 | Organoheterocyclic compounds    | -        | -          | -        | 288.801  | 141.113203 |
| POS00044 | 5224392.954 | 5719942.905 | 0.130737 | 0.75789  | 0.8874 | 0.36656 | Eicosapentaenoic acid                                                          | 0.9736668 | Lipids and lipid-like molecules | C20H30O2 | 10417-94-4 | 302.2246 | 99.91335 | 164.106836 |
| POS00045 | 182688.2354 | 107803.7029 | -0.76098 | 0.006557 | 0.1696 | 0.25282 | 3,7-dihydropurin-6-one                                                         | 0.9731353 | Organoheterocyclic compounds    | -        | -          | -        | 180.658  | 136.883432 |
| POS00046 | 1255797.845 | 1435205.868 | 0.192653 | 0.705614 | 0.8562 | 0.17478 | PA(20:2(11Z,14Z)/22:6(4Z,7Z,10Z,13Z,16Z,19Z))                                  | 0.9724809 | Lipids and lipid-like molecules | -        | -          | -        | 39.41    | 772.590338 |
| POS00047 | 3323917.998 | 798357.3546 | -2.05778 | 0.149954 | 0.4753 | 1.25516 | 2,3,4,5-Tetrahydro-6-(5-methyl-2-furanyl)pyridine                              | 0.9719978 | Organoheterocyclic compounds    | -        | -          | -        | 90.4308  | 164.052644 |
| POS00048 | 8941336.878 | 7879488.757 | -0.18239 | 0.273915 | 0.5913 | 0.61308 | 2,3-Dihydro-5-propanoyl-1H-pyrrolizine                                         | 0.971416  | Organoheterocyclic compounds    | -        | -          | -        | 77.856   | 163.122746 |
| POS00049 | 25710128.84 | 15441712.04 | -0.7355  | 0.265861 | 0.5823 | 1.734   | 1,2,3,4,5,6-Hexanydro-7H-cyclopenta[b]pyridin-7-amine                          | 0.970571  | Organoheterocyclic compounds    | -        | -          | -        | 114.547  | 138.091244 |
| POS00050 | 107483.8159 | 118986.9866 | 0.146684 | 0.625897 | 0.814  | 0.05103 | 6,10,14-Trimethyl-5,9,13-pentadecatrien-2-one                                  | 0.9704257 | Lipids and lipid-like molecules | -        | -          | -        | 33.7384  | 262.252546 |
| POS00051 | 2156093.347 | 1544930.906 | -0.48088 | 0.030183 | 0.2685 | 0.6569  | 1-Methylpyrrolo[1,2-a]pyrazine                                                 | 0.9676989 | Organoheterocyclic compounds    | -        | -          | -        | 165.014  | 132.889415 |
| POS00052 | 2627324.274 | 834028.4366 | -1.65543 | 0.005665 | 0.1571 | 1.21611 | Oleamide                                                                       | 0.9675278 | Lipids and lipid-like molecules | C18H35NO | 301-02-0   | 281.2719 | 40.2267  | 281.283155 |
| POS00053 | 1371580.479 | 912335.2162 | -0.5882  | 0.039079 | 0.2955 | 0.5658  | (R)-2-Hydroxysterolic acid                                                     | 0.966913  | Lipids and lipid-like molecules | -        | -          | -        | 36.7726  | 310.258041 |
| POS00054 | 171897.7893 | 121000.7141 | -0.50654 | 0.011969 | 0.2051 | 0.20073 | 2-amino-2-(2R,4S,5R)-4-hydroxy-5-(hydroxymethyl)hexan-2-one                    | 0.9661225 | nucleosides, and analogues      | -        | -          | -        | 182.142  | 267.838051 |
| POS00055 | 326490.119  | 298206.9179 | -0.13073 | 0.367866 | 0.6472 | 0.1002  | 2-(2-Furanyl)-3,4,5,6-tetrahydropyridine                                       | 0.9641355 | Organoheterocyclic compounds    | -        | -          | -        | 70.6313  | 150.037111 |
| POS00056 | 1146685.865 | 608675.5789 | -0.91372 | 0.051881 | 0.3215 | 0.60253 | (2S)-2-amino-4-methylpentanoic acid                                            | 0.9635222 | Organic acids and derivatives   | -        | -          | -        | 97.8208  | 133.101091 |
| POS00057 | 8409429.499 | 4955991.37  | -0.76283 | 0.034257 | 0.282  | 1.41343 | 5-aminopentanoic acid                                                          | 0.96028   | Organic acids and derivatives   | -        | -          | -        | 625.088  | 117.110128 |
| POS00058 | 4664928.866 | 3460164.924 | -0.43101 | 0.099714 | 0.4055 | 0.77143 | 3-Pentylpyridine                                                               | 0.9590095 | Organoheterocyclic compounds    | -        | -          | -        | 34.7227  | 150.127757 |

|          |             |             |          |          |        |         |                                              |           |                                     |           |                   |   |          |            |            |
|----------|-------------|-------------|----------|----------|--------|---------|----------------------------------------------|-----------|-------------------------------------|-----------|-------------------|---|----------|------------|------------|
| POS00059 | 774578.2695 | 695271.294  | -0.15584 | 0.361993 | 0.6439 | 0.16305 | ∠-(∠-<br>hydroxyethylamino)ethan<br>ol       | 0.9557044 | Organic nitrogen<br>compounds       | -         | -                 | - | 299.139  | 106.086089 |            |
| POS00060 | 1322304.377 | 717830.1716 | -0.88134 | 0.151221 | 0.4779 | 0.51388 | 4,6-Dihydroxy-2-<br>quinolinecarboxylic acid | 0.9532144 | Organoheterocyclic<br>compounds     | -         | -                 | - | 163.671  | 205.07454  |            |
| POS00061 | 443992.0402 | 322621.3943 | -0.46069 | 0.049819 | 0.3188 | 0.28137 | Fucoxanthin                                  | 0.952497  | Lipids and lipid-<br>like molecules | -         | -                 | - | 32.45055 | 658.459387 |            |
| POS00062 | 1210484.621 | 1147554.901 | -0.07702 | 0.761542 | 0.8887 | 0.05479 | 4,5-Diethyl-2-<br>methyloxazole              | 0.9496039 | Organoheterocyclic<br>compounds     | -         | -                 | - | 618.893  | 139.914511 |            |
| POS00063 | 9777022.361 | 8445297.132 | -0.21125 | 0.206763 | 0.5314 | 0.69198 | 2,5-Dimethyloxazole                          | 0.946994  | Organoheterocyclic<br>compounds     | -         | -                 | - | 39.5031  | 97.0759565 |            |
| POS00064 | 405005.8631 | 260052.8702 | -0.63914 | 0.069591 | 0.3558 | 0.29772 | 2-Acetylpyrrolidine                          | 0.9458294 | Organoheterocyclic<br>compounds     | -         | -                 | - | 259.3295 | 114.102369 |            |
| POS00065 | 557134.1827 | 712790.8499 | 0.355454 | 0.279548 | 0.5955 | 0.25618 | Epsilon-caprolactam                          | 0.9457609 | Organoheterocyclic<br>compounds     | -         | -                 | - | 184.032  | 114.054892 |            |
| POS00066 | 439096.2029 | 311188.9455 | -0.49675 | 0.024157 | 0.2512 | 0.30337 | 5-Pentyloxazole                              | 0.9444758 | Organoheterocyclic<br>compounds     | -         | -                 | - | 672.669  | 139.914539 |            |
| POS00067 | 238898.9956 | 236801.4658 | -0.01272 | 0.95849  | 0.9811 | 0.01693 | Dimethyl dialkyl<br>ammonium chloride        | 0.9442598 | Organonitrogen<br>compounds         | -         | -                 | - | 121.7015 | 303.307735 |            |
| POS00068 | 142046.3445 | 1691507.484 | 3.573876 | 0.157777 | 0.4863 | 0.75586 | Conhydrinone                                 | 0.9438567 | Organoheterocyclic<br>compounds     | -         | -                 | - | 36.1187  | 141.127375 |            |
| POS00069 | 3019111.185 | 1342682.268 | -1.16901 | 0.174996 | 0.501  | 0.83406 | 2,5-Dihydro-2,4,5-<br>trimethyloxazole       | 0.9335861 | Organoheterocyclic<br>compounds     | -         | -                 | - | 135.6825 | 115.05017  |            |
| POS00070 | 541952.6832 | 357093.5044 | -0.60187 | 0.106012 | 0.4144 | 0.30574 | Methyprylon                                  | 0.9090608 | Organoheterocyclic<br>compounds     | -         | -                 | - | 40.8207  | 184.002805 |            |
| POS00071 | 64317.13456 | 61402.57653 | -0.0669  | 0.83063  | 0.9228 | 0.00962 | Lutein                                       | 0.9083562 | Lipids and lipid-<br>like molecules | -         | -                 | - | 31.9881  | 567.455902 |            |
| POS00072 | 1710038.162 | 1150027.914 | -0.57236 | 0.236736 | 0.557  | 0.56344 | Pyrimidine                                   | 0.9057225 | Organoheterocyclic<br>compounds     | -         | -                 | - | 247.131  | 80.9880442 |            |
| POS00073 | 5971477.086 | 4216424.797 | -0.50207 | 0.000635 | 0.0721 | 1.27486 | Ketoconazole                                 | 0.9039576 | Organoheterocyclic<br>compounds     | C26H28Cl2 | 65277-42-<br>N4O4 | 1 | 530.1488 | 216.826    | 87.0915192 |
| POS00074 | 1554754.986 | 1419136.913 | -0.13167 | 0.349062 | 0.636  | 0.21862 | PE(16:0/16:1(9Z))                            | 0.8980114 | Lipids and lipid-<br>like molecules | -         | -                 | - | 143.507  | 690.504252 |            |
| POS00075 | 2759777.091 | 1857546.867 | -0.57115 | 0.052683 | 0.3231 | 0.78534 | Benzyl methyl sulfide                        | 0.8873532 | Benzenoids                          | -         | -                 | - | 158.287  | 127.122871 |            |
| POS00076 | 215805.9642 | 169571.9284 | -0.34784 | 0.127156 | 0.4454 | 0.15762 | Armillaramide                                | 0.8829603 | Lipids and lipid-<br>like molecules | -         | -                 | - | 27.7231  | 555.532722 |            |
| POS00077 | 7205990.251 | 2263785.316 | -1.67046 | 0.027012 | 0.2593 | 1.9952  | 2-Ethyl-5-methyloxazole                      | 0.8788891 | Organoheterocyclic<br>compounds     | -         | -                 | - | 128.858  | 112.063434 |            |
| POS00078 | 1608729.964 | 1230429.013 | -0.38676 | 0.048306 | 0.3148 | 0.49363 | 6-aminohexanoic acid                         | 0.8756705 | Lipids and lipid-<br>like molecules | -         | -                 | - | 37.15805 | 131.106639 |            |
| POS00079 | 148049.8408 | 117811.8101 | -0.3296  | 0.373142 | 0.6502 | 0.09157 | Oxprenolol                                   | 0.8713709 | Benzenoids                          | -         | -                 | - | 144.8555 | 266.002104 |            |
| POS00080 | 2354784.479 | 908463.7508 | -1.37409 | 0.287339 | 0.6026 | 0.66264 | 5-Acetyl-3,4-dihydro-2H-<br>pyrrole          | 0.8663978 | Organoheterocyclic<br>compounds     | -         | -                 | - | 57.4628  | 112.050405 |            |
| POS00081 | 10212433.5  | 7510166.441 | -0.44341 | 0.326332 | 0.6319 | 1.02559 | 2-Isopropyl-1,4-<br>benzenediol              | 0.8661172 | Benzenoids                          | -         | -                 | - | 19.20635 | 152.106823 |            |

|          |             |             |          |          |        |         |                                                                    |           |                                  |          |          |         |          |            |
|----------|-------------|-------------|----------|----------|--------|---------|--------------------------------------------------------------------|-----------|----------------------------------|----------|----------|---------|----------|------------|
| POS00082 | 818672.6616 | 596086.7444 | -0.45776 | 0.118285 | 0.4332 | 0.34765 | Aprindine                                                          | 0.8659838 | Benzenoids                       | -        | -        | -       | 36.1259  | 322.258081 |
| POS00083 | 1454810.196 | 1074618.918 | -0.43701 | 0.026184 | 0.2576 | 0.49355 | 6-Deoxyfagomine                                                    | 0.8610939 | Organoheterocyclic compounds     | -        | -        | -       | 33.63935 | 132.080833 |
| POS00084 | 560766.1348 | 335322.1597 | -0.74185 | 0.040764 | 0.2986 | 0.38613 | Cyclocalopin F                                                     | 0.8608839 | Organoheterocyclic compounds     | -        | -        | -       | 43.78945 | 294.18036  |
| POS00085 | 16639295.09 | 4810115.883 | -1.79045 | 0.0677   | 0.3527 | 2.78048 | Methylimidazole acetaldehyde                                       | 0.8592418 | Organoheterocyclic compounds     | -        | -        | -       | 621.18   | 125.115285 |
| POS00086 | 1926027.293 | 1743660.901 | -0.14351 | 0.093954 | 0.3971 | 0.33779 | 2,5-Dimethyl-1H-pyrrole                                            | 0.8541975 | Organoheterocyclic compounds     | -        | -        | -       | 580.126  | 96.0442449 |
| POS00087 | 8727548.002 | 8040980.195 | -0.11821 | 0.803936 | 0.9105 | 0.37565 | Trimethylaminoacetone                                              | 0.8448173 | Organic oxygen compounds         | -        | -        | -       | 2.558175 | 116.106834 |
| POS00088 | 1723600.798 | 1514112.616 | -0.18695 | 0.267749 | 0.5849 | 0.27292 | Ethylphosphate                                                     | 0.8399951 | Organic acids and derivatives    | -        | -        | -       | 40.9505  | 182.080986 |
| POS00089 | 18322880.79 | 16105275.13 | -0.18611 | 0.097735 | 0.4036 | 1.12204 | Trimethylpyrazine                                                  | 0.8366887 | Organoheterocyclic compounds     | -        | -        | -       | 197.4195 | 123.091502 |
| POS00090 | 86618.85699 | 121271.6449 | 0.485489 | 0.556976 | 0.7731 | 0.05435 | Linoleamide                                                        | 0.8344965 | Lipids and lipid-like molecules  | -        | -        | -       | 32.6924  | 281.050264 |
| POS00091 | 586573.6672 | 510638.3936 | -0.20001 | 0.122724 | 0.4403 | 0.19051 | 4,5-Dihydro-1-nyaroxy-2-methyl-4-oxo-4H-1-benzoxan-5-carboxic acid | 0.8335908 | Organoheterocyclic compounds     | -        | -        | -       | 12.01499 | 236.102286 |
| POS00092 | 4287703.268 | 3393773.557 | -0.33731 | 0.217284 | 0.5384 | 0.66257 | Acetone cyanohydrin                                                | 0.8251948 | Organic oxygen compounds         | -        | -        | -       | 67.8803  | 85.0759012 |
| POS00093 | 14152109.2  | 7458545.147 | -0.92405 | 0.005853 | 0.1609 | 2.41683 | piperazine                                                         | 0.8182894 | Organoheterocyclic compounds     | -        | -        | -       | 532.1595 | 87.0915506 |
| POS00094 | 1401953.624 | 984889.6257 | -0.5094  | 0.011449 | 0.2014 | 0.58533 | Isopropylpyrazine                                                  | 0.8158302 | Organoheterocyclic compounds     | -        | -        | -       | 156.6165 | 123.040183 |
| POS00095 | 288193621.2 | 153600702.6 | -0.90785 | 0.039838 | 0.2968 | 9.07638 | Tranexamic Acid                                                    | 0.8137318 | Organic acids and derivatives    | -        | -        | -       | 689.8185 | 157.133346 |
| POS00096 | 1           | 740434.6798 | 19.49801 | 0.340893 | 0.6326 | 0.37624 | alpha-Tocopherol succinate                                         | 0.8104298 | Lipids and lipid-like molecules  | -        | -        | -       | 37.8515  | 531.184042 |
| POS00097 | 1143271.968 | 836558.0646 | -0.45063 | 0.117113 | 0.432  | 0.41494 | (2S,3S,4R)-2-amino-octadecane-1,3,4-triol                          | 0.7898069 | Organic nitrogen compounds       | -        | -        | -       | 56.8296  | 317.323377 |
| POS00098 | 3072483.874 | 2391688.182 | -0.36138 | 0.763988 | 0.8905 | 0.48457 | Kynuramine                                                         | 0.7871388 | Organic oxygen compounds         | -        | -        | -       | 57.9245  | 165.050798 |
| POS00099 | 87629.83816 | 79495.89815 | -0.14054 | 0.743454 | 0.8788 | 0.04048 | Lycopene                                                           | 0.7839232 | Lipids and lipid-like molecules  | -        | -        | -       | 32.02745 | 535.470422 |
| POS00100 | 248473.8085 | 203085.7977 | -0.291   | 0.110809 | 0.4228 | 0.16666 | PC(18:1(11Z)/14:0)                                                 | 0.7813088 |                                  | -        | -        | -       | 159.295  | 732.380215 |
| POS00101 | 991994.2185 | 792154.6793 | -0.32455 | 0.07249  | 0.3618 | 0.30419 | 1-[2-(dimethylamino)-1-(4-methoxyphenyl)ethyl]-2-amino-2-propanol  | 0.7775101 | Benzenoids                       | -        | -        | -       | 37.22195 | 277.215471 |
| POS00102 | 1498144.354 | 1111571.179 | -0.43058 | 0.015677 | 0.2226 | 0.53967 | (hydroxymethyl)propane-1,3-diol                                    | 0.772983  | Organic compounds                | -        | -        | -       | 562.691  | 121.966047 |
| POS00103 | 264115.1414 | 242483.1714 | -0.12328 | 0.650697 | 0.829  | 0.07045 | Phytosphingosine                                                   | 0.7607878 | Organic nitrogen compounds       | C18H39NO | 554-62-1 | 317.293 | 120.327  | 317.323322 |
| POS00104 | 214567.6617 | 113204.2288 | -0.9225  | 0.024539 | 0.2524 | 0.2655  | L-α-p-Coumaroylhydroxycitric acid                                  | 0.7579365 | Phenylpropanoids and polyketides | -        | -        | -       | 36.72955 | 354.247875 |

|          |             |             |          |          |        |         |                                                                                      |           |                                  |   |   |   |          |            |
|----------|-------------|-------------|----------|----------|--------|---------|--------------------------------------------------------------------------------------|-----------|----------------------------------|---|---|---|----------|------------|
| POS00105 | 72522.7308  | 70910.25694 | -0.03244 | 0.912054 | 0.9581 | 0.01144 | PE(15:0/15:0)                                                                        | 0.7514854 | Lipids and lipid-like molecules  | - | - | - | 143.357  | 663.511699 |
| POS00106 | 596477.1171 | 635088.6564 | 0.090491 | 0.676505 | 0.8402 | 0.06125 | PC(16:0/16:0)                                                                        | 0.7460592 | Lipids and lipid-like molecules  | - | - | - | 140.633  | 734.565263 |
| POS00107 | 529174.546  | 425674.7511 | -0.31399 | 0.009224 | 0.1917 | 0.30082 | Ribose-1-arsenate                                                                    | 0.7428154 | Organic oxygen compounds         | - | - | - | 260.607  | 273.990087 |
| POS00108 | 1537607.011 | 1939680.505 | 0.335132 | 0.378173 | 0.6527 | 0.40546 | 8-hydroxy-4-oxo-1H-quinoline-2-carboxylic acid                                       | 0.7420979 | Organoheterocyclic compounds     | - | - | - | 117.269  | 205.096924 |
| POS00109 | 1239462.188 | 1043226.363 | -0.24866 | 0.501534 | 0.7379 | 0.19486 | triazatetracyclo[10.3.1.0 <sub>2,5</sub> .1 <sub>0,11</sub> ]triazolo[4,5-b]pyridine | 0.7367313 | Organoheterocyclic compounds     | - | - | - | 97.8361  | 211.132439 |
| POS00110 | 3080516.935 | 2882313.835 | -0.09595 | 0.387254 | 0.6585 | 0.22354 | 3-Methyl-1-butylamine                                                                | 0.733444  | Organic nitrogen compounds       | - | - | - | 212.285  | 88.1119076 |
| POS00111 | 71014.20413 | 58872.53282 | -0.27051 | 0.229643 | 0.5507 | 0.07476 | Cer(d18:0/16:0)                                                                      | 0.7185925 | Lipids and lipid-like molecules  | - | - | - | 33.0966  | 539.539228 |
| POS00112 | 189062.4891 | 437921.3273 | 1.211809 | 0.050588 | 0.3192 | 0.38808 | Chavicol                                                                             | 0.6813758 | Benzenoids                       | - | - | - | 54.2681  | 134.08913  |
| POS00113 | 5613565.715 | 4683448.413 | -0.26135 | 0.542476 | 0.7638 | 0.33457 | 2,4-Diamino-6-hydroxypyrimidine                                                      | 0.6768798 | Organoheterocyclic compounds     | - | - | - | 331.815  | 126.077288 |
| POS00114 | 437034.9298 | 484926.0798 | 0.150016 | 0.517328 | 0.7487 | 0.06867 | PC(22:4(7Z,10Z,13Z,16Z)/14:0)                                                        | 0.6704215 |                                  | - | - | - | 136.1835 | 782.566426 |
| POS00115 | 5554019.315 | 5077843.011 | -0.12932 | 0.616574 | 0.8092 | 0.24831 | 1,2,3,4,6-pentahydroxy-5-(1-hydroxyethylidene)-7H-pyrimidopyridin-7(1H)-one          | 0.6528562 | Organoheterocyclic compounds     | - | - | - | 237.336  | 180.101785 |
| POS00116 | 117976.7204 | 113500.1174 | -0.05581 | 0.719598 | 0.8647 | 0.01544 | Cer(d18:0/14:0)                                                                      | 0.6352478 | Lipids and lipid-like molecules  | - | - | - | 33.13045 | 511.507479 |
| POS00117 | 797158.778  | 838374.2373 | 0.072727 | 0.841413 | 0.9279 | 0.08051 | Pipericine                                                                           | 0.610972  | Lipids and lipid-like molecules  | - | - | - | 12.7431  | 335.976981 |
| POS00118 | 55524.13814 | 70844.886   | 0.351549 | 0.268534 | 0.5855 | 0.08698 | Idoxanthin                                                                           | 0.577698  | Lipids and lipid-like molecules  | - | - | - | 37.9009  | 598.538411 |
| POS00119 | 72819.09343 | 70464.79414 | -0.04741 | 0.8661   | 0.9397 | 0.00336 | Epomusenin A                                                                         | 0.5685018 | Lipids and lipid-like molecules  | - | - | - | 38.1068  | 558.53455  |
| POS00120 | 451734.7413 | 328039.6441 | -0.46161 | 0.208491 | 0.5321 | 0.24175 | N-Nitroso-pyrrolidine                                                                | 0.5507708 | Organoheterocyclic compounds     | - | - | - | 278.896  | 100.979355 |
| POS00121 | 490245.0006 | 507969.789  | 0.05124  | 0.935288 | 0.9711 | 0.04202 | 5,6,7,8-Tetrahydro-2,4-dimethylquinoline                                             | 0.5474782 | Organoheterocyclic compounds     | - | - | - | 38.5022  | 161.132433 |
| POS00122 | 6600927.042 | 5727594.224 | -0.20474 | 0.474407 | 0.7206 | 0.45486 | Inositol 1,3,4-trisphosphate                                                         | 0.5301872 | Organic oxygen compounds         | - | - | - | 407.953  | 420.969157 |
| POS00123 | 2308685.583 | 1306091.206 | -0.82182 | 0.180951 | 0.5068 | 0.627   | alpha-Methylphenylalanine                                                            | 0.5231091 | Phenylpropanoids and polyketides | - | - | - | 257.0225 | 180.14923  |
| POS00124 | 242488.8872 | 221303.4835 | -0.13189 | 0.305709 | 0.6178 | 0.1025  | PC(22:5(7Z,10Z,13Z,16Z,19Z)/16:0)                                                    | 0.5176472 | Lipids and lipid-like molecules  | - | - | - | 136.011  | 808.578938 |
| POS00125 | 27047.06944 | 39907.90839 | 0.561202 | 0.21448  | 0.5366 | 0.07225 | Chlorophyll b                                                                        | 0.5165205 | Organoheterocyclic compounds     | - | - | - | 32.9071  | 906.57811  |
| POS00126 | 54016.31141 | 42935.46575 | -0.33123 | 0.511228 | 0.7452 | 0.04616 | 5,5-Dimino-4-hydroxy-2-methoxy-6-methylbenzoic acid                                  | 0.5018735 | Benzenoids                       | - | - | - | 187.685  | 250.041105 |
| POS00127 | 4202565.137 | 3458741.442 | -0.28102 | 0.477537 | 0.7223 | 0.32294 | Dimethylaniline-N-oxide                                                              | 0.4863843 | Benzenoids                       | - | - | - | 719.2135 | 138.054901 |

|          |             |             |          |          |        |         |                                                     |            |                                     |   |   |   |          |            |
|----------|-------------|-------------|----------|----------|--------|---------|-----------------------------------------------------|------------|-------------------------------------|---|---|---|----------|------------|
| POS00128 | 457098.2275 | 299500.6827 | -0.60994 | 0.051248 | 0.3203 | 0.30847 | 1'-Acetoxyeugenol acetate                           | 0.4854602  | Benzenoids                          | - | - | - | 38.7922  | 264.242389 |
| POS00129 | 107039.7148 | 103172.9807 | -0.05308 | 0.869127 | 0.9413 | 0.00278 | Crassostrea<br>Secocarotenoid                       | 0.4081819  | Lipids and lipid-<br>like molecules | - | - | - | 36.773   | 616.433864 |
| POS00130 | 157763.2625 | 83644.25749 | -0.91542 | 0.000835 | 0.0732 | 0.26739 | PE(18:2(9Z,12Z)/20:3(5Z,<br>8Z,11Z))                | 0.3626898  | Lipids and lipid-<br>like molecules | - | - | - | 31.44485 | 765.575457 |
| POS00283 | 2917117.978 | 2852284.419 | -0.03243 | 0.855876 | 0.9346 | 0.09558 | 2-Amino-3,4-<br>dihydroxypentanedioic<br>acid       | 14.740037  |                                     | - | - | - | 719.714  | 180.138017 |
| POS00286 | 1003769.225 | 849697.0964 | -0.24041 | 0.020944 | 0.2409 | 0.32295 | Acetyldemethylphosphinot<br>brevian                 | 20.515509  |                                     | - | - | - | 719.7115 | 210.148467 |
| POS00287 | 33815904.46 | 35251715.85 | 0.059992 | 0.840705 | 0.9276 | 0.28866 | Fosetyl                                             | -8.0924409 |                                     | - | - | - | 719.711  | 111.055286 |
| POS00290 | 3852575.057 | 3553746.446 | -0.11648 | 0.749762 | 0.8827 | 0.1236  | 5-Nitrofurfural                                     | -19.26487  |                                     | - | - | - | 719.381  | 142.086159 |
| POS00291 | 585530.5159 | 490833.6709 | -0.25451 | 0.031118 | 0.2714 | 0.24169 | 2-C-Methyl-D-erythritol 4-<br>phosphate             | -2.1072348 |                                     | - | - | - | 719.38   | 217.133121 |
| POS00301 | 987499.9681 | 352094.6558 | -1.48782 | 0.182579 | 0.5082 | 0.5114  | 2-Aminophenoxazin-3-one                             | 16.751098  |                                     | - | - | - | 716.714  | 213.214931 |
| POS00309 | 747436.7828 | 201055.8926 | -1.89435 | 0.104307 | 0.4115 | 0.61749 | Pelargonidin 3-O-(6-O-<br>malonyl-beta-D-glucoside) | -8.9097642 |                                     | - | - | - | 715.725  | 520.434249 |
| POS00316 | 2122331.616 | 1464767.384 | -0.53498 | 0.125238 | 0.4435 | 0.60026 | Quite                                               | -22.214675 |                                     | - | - | - | 714.391  | 193.169608 |
| POS00318 | 1773099.034 | 1705497.576 | -0.05608 | 0.872256 | 0.9428 | 0.08277 | 5-O-Methyl-myo-inositol                             | -23.125603 |                                     | - | - | - | 714.38   | 195.185286 |
| POS00326 | 793053.4776 | 676021.9135 | -0.23035 | 0.033468 | 0.2804 | 0.27666 | Boc-Asn-OPhNO2                                      | 2.1000262  |                                     | - | - | - | 713.725  | 354.335319 |
| POS00335 | 1431357.489 | 1125149.242 | -0.34727 | 0.388734 | 0.6595 | 0.34055 | Glyphosate-<br>isopropylammonium                    | -0.3140496 |                                     | - | - | - | 713.046  | 229.190505 |
| POS00344 | 2639081.539 | 2334182.253 | -0.17712 | 0.567046 | 0.7783 | 0.21549 | N,N'-dinitrosopiperazine                            | 16.158944  |                                     | - | - | - | 712.0475 | 145.141506 |
| POS00348 | 3720783.747 | 3219653.646 | -0.2087  | 0.242749 | 0.5618 | 0.38812 | 2,3,6-Trihydroxypyridine                            | 11.681132  |                                     | - | - | - | 711.3855 | 128.106861 |
| POS00349 | 14210540.54 | 27656555.18 | 0.96066  | 0.191458 | 0.5181 | 2.28642 | (S)-Dihydroorotate                                  | 8.4508128  |                                     | - | - | - | 711.3855 | 159.120713 |
| POS00352 | 1086279.462 | 1307284.372 | 0.267178 | 0.449864 | 0.704  | 0.25194 | D-Ribose 5-phosphate                                | -20.771875 |                                     | - | - | - | 711.045  | 231.112297 |
| POS00358 | 5082637.94  | 2944949.847 | -0.78733 | 0.258369 | 0.5766 | 0.9272  | 1,3,7-Trimethyluric acid                            | 9.7970251  |                                     | - | - | - | 710.395  | 211.199336 |
| POS00360 | 442423.4783 | 691040.1087 | 0.643342 | 0.090103 | 0.3896 | 0.37153 | Didecyldimethylammoniu<br>m chloride                | 7.9335209  |                                     | - | - | - | 710.3795 | 363.086349 |
| POS00363 | 2566907.365 | 2649918.819 | 0.045917 | 0.911942 | 0.9581 | 0.07951 | Methyl (2-propenylthio)<br>selenide                 | 4.5989612  |                                     | - | - | - | 710.0475 | 168.138045 |
| POS00365 | 1217805.772 | 1020502.199 | -0.255   | 0.044062 | 0.3081 | 0.36157 | S-(1,2-Dichlorovinyl)-L-<br>cysteine                | 17.72278   |                                     | - | - | - | 709.883  | 217.096706 |
| POS00369 | 1619025.086 | 1282839.823 | -0.33578 | 0.233247 | 0.5541 | 0.3885  | Stipitatote                                         | -18.02368  |                                     | - | - | - | 708.88   | 209.128025 |



|          |             |             |          |          |        |         |                                             |            |   |   |   |          |            |
|----------|-------------|-------------|----------|----------|--------|---------|---------------------------------------------|------------|---|---|---|----------|------------|
| POS00370 | 2332612.96  | 1714871.158 | -0.44385 | 0.150165 | 0.4755 | 0.52566 | N-Dimethyl-2-aminoethylphosphite            | -9.6785145 | - | - | - | 708.555  | 154.122495 |
| POS00379 | 4030506.27  | 2960134.526 | -0.4453  | 0.363664 | 0.6446 | 0.65507 | 3-Nitroacrylate                             | -21.093885 | - | - | - | 706.898  | 118.065007 |
| POS00384 | 1469811.37  | 1163112.873 | -0.33764 | 0.151581 | 0.4784 | 0.41524 | Tetrahydroxypteridine                       | 2.2087658  | - | - | - | 706.72   | 197.12811  |
| POS00391 | 1885427.762 | 1167619.11  | -0.69132 | 0.133519 | 0.4539 | 0.6347  | 2,4-Dinitroaniline                          | 22.381763  | - | - | - | 706.058  | 184.132975 |
| POS00399 | 2510196.594 | 2186240.277 | -0.19935 | 0.519085 | 0.7499 | 0.26927 | [5-(Aminomethyl)furan-3-yl]methyl phosphate | 21.456975  | - | - | - | 704.8975 | 208.132821 |
| POS00400 | 2337816.664 | 5733679.716 | 1.2943   | 0.382321 | 0.656  | 1.01278 | Cis-4-Carboxymethylenebut-2-enediolide      | 8.7055943  | - | - | - | 704.574  | 141.102096 |
| POS00402 | 3300102.862 | 2743471.473 | -0.26651 | 0.606009 | 0.802  | 0.23883 | Isopentenyl phosphate                       | -10.571321 | - | - | - | 704.396  | 167.117721 |
| POS00404 | 2859001.778 | 2970547.575 | 0.055217 | 0.908471 | 0.9578 | 0.02036 | 5-Nitrofurfural                             | -19.130445 | - | - | - | 703.401  | 142.086178 |
| POS00418 | 14551661.57 | 25219688.05 | 0.793367 | 0.123525 | 0.441  | 2.59152 | Fosetyl                                     | -8.1513528 | - | - | - | 702.071  | 111.05528  |
| POS00421 | 850546.6595 | 807407.5546 | -0.07509 | 0.538724 | 0.7611 | 0.07181 | Calcium glycerophosphate                    | 2.7105971  | - | - | - | 701.2555 | 211.143646 |
| POS00432 | 1093375.88  | 914227.4945 | -0.25816 | 0.052501 | 0.3231 | 0.32479 | O-Phospho-4-hydroxy-L-threonine             | -19.872622 | - | - | - | 699.103  | 216.101502 |
| POS00434 | 3078904.629 | 3440895.326 | 0.160367 | 0.481012 | 0.7243 | 0.25807 | Z-Amino-3,4-dihydroxypentanedioic acid      | 14.57505   | - | - | - | 698.932  | 180.137987 |
| POS00438 | 685936.4104 | 668174.1651 | -0.03785 | 0.887756 | 0.9486 | 0.00344 | Se-Propenylselenocysteine Se-oxide          | -3.8681939 | - | - | - | 698.757  | 225.12281  |
| POS00440 | 1945294.641 | 2436642.499 | 0.324906 | 0.355356 | 0.6391 | 0.45531 | 3-Oxalomalate                               | -8.9700892 | - | - | - | 698.107  | 207.112428 |
| POS00442 | 977432.1036 | 795569.1414 | -0.29701 | 0.040183 | 0.2969 | 0.35455 | Apraclonidine                               | -15.730637 | - | - | - | 697.926  | 246.111921 |
| POS00447 | 1387096.139 | 1544551.521 | 0.15512  | 0.60196  | 0.7987 | 0.16065 | 3-(Imidazol-4-yl)-2-oxopropyl phosphate     | 4.0256796  | - | - | - | 697.766  | 221.127963 |
| POS00453 | 1296061.867 | 918164.0441 | -0.49731 | 0.07699  | 0.3707 | 0.46422 | D-Ribitol 5-phosphate                       | -21.907453 | - | - | - | 697.2725 | 233.127891 |
| POS00456 | 2487331.507 | 1993233.547 | -0.31949 | 0.578398 | 0.7848 | 0.30522 | Citrate                                     | 12.963365  | - | - | - | 696.775  | 193.133267 |
| POS00467 | 3244704.778 | 2761366.835 | -0.2327  | 0.576619 | 0.7836 | 0.3305  | Methyl 2-propenyl selenide                  | -12.11644  | - | - | - | 694.46   | 136.07564  |
| POS00471 | 1715785.323 | 1439399.096 | -0.2534  | 0.405173 | 0.6714 | 0.25415 | Oxalosuccite                                | 13.955025  | - | - | - | 693.9635 | 191.11753  |
| POS00472 | 21845352.98 | 22589445.35 | 0.048322 | 0.928675 | 0.9674 | 0.02102 | N-Formylmaleamic acid                       | -20.908811 | - | - | - | 693.9575 | 144.101785 |
| POS00486 | 1323339.113 | 1339213.145 | 0.017203 | 0.953345 | 0.9797 | 0.01309 | 4-Nitrophenyl phosphate                     | 1.7340801  | - | - | - | 691.312  | 220.096357 |
| POS00492 | 2511195.284 | 2830596.242 | 0.172732 | 0.708819 | 0.8579 | 0.08649 | Cytosine                                    | 24.450973  | - | - | - | 690.485  | 112.111993 |

|          |             |             |          |          |        |         |                                                    |            |   |   |   |          |            |
|----------|-------------|-------------|----------|----------|--------|---------|----------------------------------------------------|------------|---|---|---|----------|------------|
| POS00497 | 528073.4947 | 445022.7483 | -0.24686 | 0.062918 | 0.3422 | 0.23572 | Dopaquinone                                        | 5.7263472  | - | - | - | 689.826  | 196.180494 |
| POS00499 | 1391908.242 | 999516.4659 | -0.47776 | 0.518355 | 0.7495 | 0.2215  | 5-O-Methyl-myo-inositol                            | -23.235005 | - | - | - | 689.495  | 195.185265 |
| POS00500 | 1742570.914 | 1843393.822 | 0.081147 | 0.842054 | 0.9279 | 0.09002 | 2-Aminoethyl diphenylborite                        | 24.949155  | - | - | - | 689.495  | 226.106793 |
| POS00504 | 833296.4139 | 840415.6447 | 0.012273 | 0.909473 | 0.9581 | 0.00446 | 2-Amino-5-(5-nitro-2-furyl)-1,3,4-thiadiazole      | 11.322638  | - | - | - | 689.165  | 213.195679 |
| POS00505 | 2719856.561 | 2105552.244 | -0.36933 | 0.185822 | 0.5118 | 0.4917  | Sepiapterin                                        | 19.218458  | - | - | - | 688.836  | 238.227136 |
| POS00516 | 1865742.113 | 2571209.71  | 0.462698 | 0.332168 | 0.6326 | 0.48269 | N-Dimethyl-2-aminoethylphosphate                   | -9.8127107 | - | - | - | 687.183  | 154.122474 |
| POS00525 | 1888682.984 | 2170636.118 | 0.200737 | 0.675072 | 0.8396 | 0.10314 | Methyl (2-propenylthio) selenide                   | 4.5350926  | - | - | - | 686.3565 | 168.138035 |
| POS00531 | 1991633.208 | 2447555.857 | 0.29739  | 0.513374 | 0.7463 | 0.26729 | 5-Amino-4-imidazolecarboxamide                     | -8.611761  | - | - | - | 685.533  | 127.122791 |
| POS00532 | 2896665.988 | 3762230.046 | 0.377195 | 0.477424 | 0.7223 | 0.4154  | 3-Nitroacrylate                                    | -21.294767 | - | - | - | 685.3645 | 118.064984 |
| POS00539 | 4471723.383 | 3589337.991 | -0.31711 | 0.546153 | 0.7665 | 0.57111 | 5-Nitrofurfural                                    | -19.376383 | - | - | - | 684.542  | 142.086143 |
| POS00543 | 1304171.911 | 1289411.175 | -0.01642 | 0.946981 | 0.9764 | 0.04336 | Dichlormid                                         | -2.7750685 | - | - | - | 684.044  | 209.091699 |
| POS00545 | 1088077.319 | 1031583.97  | -0.07692 | 0.798931 | 0.9083 | 0.08843 | Didecyldimethylammonium chloride                   | 7.7932245  | - | - | - | 683.892  | 363.086298 |
| POS00546 | 2231512.693 | 1943858.525 | -0.1991  | 0.591998 | 0.7918 | 0.17371 | N,N'-dinitrosopiperazine                           | 16.031981  | - | - | - | 683.8805 | 145.141487 |
| POS00549 | 14022490.31 | 4515482.439 | -1.63479 | 0.186234 | 0.5124 | 1.99466 | (S)-Dihydroorotate                                 | 8.4227072  | - | - | - | 683.7215 | 159.120708 |
| POS00555 | 1390596.306 | 1384887.55  | -0.00593 | 0.983611 | 0.9919 | 0.04281 | D-Ribose 5-phosphate                               | -20.861732 | - | - | - | 683.3905 | 231.112276 |
| POS00571 | 3711282.308 | 2501412.001 | -0.56918 | 0.253022 | 0.5714 | 0.77864 | 1,3,7-Trimethyluric acid                           | 9.7599464  | - | - | - | 681.7455 | 211.199328 |
| POS00579 | 1648228.83  | 1335975.761 | -0.30302 | 0.32462  | 0.631  | 0.31817 | 2,4-Dinitroaniline                                 | 22.361992  | - | - | - | 680.9115 | 184.132972 |
| POS00580 | 1090212.991 | 908065.4691 | -0.26374 | 0.117546 | 0.432  | 0.30499 | S-(1,2-Dichlorovinyl)-L-cysteine                   | 17.766445  | - | - | - | 680.9095 | 217.096716 |
| POS00585 | 2675386.232 | 2630781.602 | -0.02426 | 0.953368 | 0.9797 | 0.03266 | Isopentenyl phosphate                              | -10.620497 | - | - | - | 679.594  | 167.117712 |
| POS00593 | 19461930.84 | 6942478.699 | -1.48713 | 0.238867 | 0.5588 | 2.20219 | <sup>cis</sup> -4-Carboxymethylenebut-2-en-1-olide | 8.7188504  | - | - | - | 678.1075 | 141.102098 |
| POS00595 | 1830691.574 | 1416320.147 | -0.37024 | 0.455782 | 0.7088 | 0.29432 | [5-(Aminomethyl)furan-3-yl]methyl phosphate        | 21.391738  | - | - | - | 675.966  | 208.132807 |
| POS00599 | 34829330.37 | 21633600.62 | -0.68703 | 0.262704 | 0.58   | 2.41614 | Calcium hydroxide                                  | -4.3791828 | - | - | - | 674.323  | 75.0996521 |
| POS00600 | 940859.2929 | 856231.7114 | -0.13598 | 0.349166 | 0.636  | 0.15849 | <sup>IN</sup> -Acetyldemethylphosphinotricin       | 20.229401  | - | - | - | 674.3195 | 210.148407 |

|          |             |             |          |          |        |         |                                               |            |   |   |   |          |            |
|----------|-------------|-------------|----------|----------|--------|---------|-----------------------------------------------|------------|---|---|---|----------|------------|
| POS00605 | 1814543.334 | 1841857.514 | 0.021555 | 0.959557 | 0.9815 | 0.04411 | 2-Amino-3,4-dihydroxypentanedioic acid        | 14.482234  | - | - | - | 672.008  | 180.137971 |
| POS00608 | 1385747.586 | 929587.4561 | -0.576   | 0.073166 | 0.3629 | 0.49209 | Glyphosate-isopropylammonium                  | -0.3911514 | - | - | - | 671.6725 | 229.190487 |
| POS00615 | 1148775.787 | 887455.595  | -0.37235 | 0.156319 | 0.4846 | 0.3469  | Quite                                         | -22.301345 | - | - | - | 667.389  | 193.169591 |
| POS00617 | 957800.2506 | 883297.9225 | -0.11682 | 0.599432 | 0.7972 | 0.09667 | 2-Aminophenoxazin-3-one                       | 16.328212  | - | - | - | 666.898  | 213.214842 |
| POS00622 | 1846866.348 | 1668337.16  | -0.14667 | 0.320495 | 0.6284 | 0.2592  | Methyl (2-propenylthio)selenide               | 4.4861906  | - | - | - | 665.746  | 168.138026 |
| POS00625 | 2671448.818 | 2577239.484 | -0.0518  | 0.907186 | 0.9573 | 0.08686 | Cytosine                                      | 24.620403  | - | - | - | 665.408  | 112.112012 |
| POS00628 | 2058222.246 | 1873618.341 | -0.13557 | 0.699204 | 0.852  | 0.16437 | 5-Amino-4-imidazolecarboxamide                | -8.6628356 | - | - | - | 665.084  | 127.122784 |
| POS00640 | 1452185.884 | 1296878.194 | -0.16318 | 0.186654 | 0.5126 | 0.25693 | 3-Oxalomalate                                 | -8.9869955 | - | - | - | 663.108  | 207.112424 |
| POS00641 | 946738.6006 | 835976.4484 | -0.1795  | 0.442154 | 0.6982 | 0.16263 | 2-Amino-5-(5-nitro-2-furyl)-1,3,4-thiadiazole | 11.241793  | - | - | - | 663.106  | 213.195662 |
| POS00644 | 1713391.21  | 1403848.307 | -0.28747 | 0.043889 | 0.3077 | 0.4803  | Citrate                                       | 12.840127  | - | - | - | 662.458  | 193.133243 |
| POS00648 | 3818591.024 | 3096405.35  | -0.30245 | 0.306281 | 0.6184 | 0.51053 | Sepiapterin                                   | 19.26452   | - | - | - | 661.791  | 238.227146 |
| POS00650 | 2308840.468 | 1927252.478 | -0.26062 | 0.261001 | 0.5788 | 0.3624  | Methyl 2-propenylselenide                     | -12.319642 | - | - | - | 661.4645 | 136.075613 |
| POS00660 | 2843066.603 | 2554224.198 | -0.15456 | 0.653499 | 0.8295 | 0.21538 | 1,3,7-Trimethyluric acid                      | 9.7061609  | - | - | - | 659.829  | 211.199317 |
| POS00662 | 1646313.549 | 1472260.586 | -0.16121 | 0.460453 | 0.7119 | 0.22297 | N-Dimethyl-2-aminoethylphosphate              | -9.7896438 | - | - | - | 659.827  | 154.122478 |
| POS00667 | 1468313.393 | 1383183.451 | -0.08617 | 0.779371 | 0.8987 | 0.12215 | 5-O-Methyl-myo-inositol                       | -23.244811 | - | - | - | 659.5035 | 195.185263 |
| POS00669 | 768493.8751 | 1002790.507 | 0.383915 | 0.31499  | 0.6245 | 0.2401  | 2,4-Dinitroaniline                            | 22.371467  | - | - | - | 659.5015 | 184.132973 |
| POS00687 | 957128.1528 | 771766.5705 | -0.31055 | 0.047547 | 0.3143 | 0.3603  | 3-(Imidazol-4-yl)-2-oxopropyl phosphate       | 4.1424046  | - | - | - | 658.172  | 221.127988 |
| POS00694 | 314380.1339 | 243745.0348 | -0.36714 | 0.003431 | 0.1265 | 0.25379 | Dopaquinone                                   | 6.0874134  | - | - | - | 657.193  | 196.180565 |
| POS00706 | 1397963.52  | 1301715.718 | -0.10291 | 0.24408  | 0.5624 | 0.20012 | 3-(Phosphoacetylamido)-L-alanine              | 8.8440521  | - | - | - | 655.548  | 243.133218 |
| POS00707 | 4440965.275 | 2657453.505 | -0.74083 | 0.038852 | 0.2951 | 1.08583 | 3-Nitroacrylate                               | -21.36908  | - | - | - | 655.5475 | 118.064975 |
| POS00709 | 440587.6131 | 400851.2402 | -0.13636 | 0.60036  | 0.7976 | 0.1077  | Violacene                                     | -1.4185754 | - | - | - | 655.545  | 355.932973 |
| POS00712 | 3084069.778 | 2426084.418 | -0.34621 | 0.38655  | 0.6583 | 0.3638  | Phosphoagmatine                               | 6.3978363  | - | - | - | 655.22   | 211.180021 |
| POS00713 | 1693732.039 | 1385658.102 | -0.28963 | 0.364813 | 0.6452 | 0.30046 | Didecyldimethylammonium chloride              | 8.0697732  | - | - | - | 655.0525 | 363.086398 |

|          |             |             |          |          |        |         |                                               |            |   |   |   |          |            |
|----------|-------------|-------------|----------|----------|--------|---------|-----------------------------------------------|------------|---|---|---|----------|------------|
| POS00714 | 2723801.813 | 3350248.208 | 0.298646 | 0.41268  | 0.677  | 0.38683 | N,N'-dinitrosopiperazine                      | 15.977515  | - | - | - | 655.051  | 145.141479 |
| POS00715 | 17565494.83 | 7562786.969 | -1.21575 | 0.424846 | 0.685  | 1.70809 | (S)-Dihydroorotate                            | 8.3585401  | - | - | - | 655.0505 | 159.120698 |
| POS00730 | 564775.4709 | 507323.4445 | -0.15477 | 0.598338 | 0.7961 | 0.10682 | Boc-Asn-OPhNO2                                | 1.6694456  | - | - | - | 650.941  | 354.335166 |
| POS00733 | 1063599.266 | 846535.2733 | -0.32931 | 0.033658 | 0.2804 | 0.36585 | Oxalosuccite                                  | 13.848895  | - | - | - | 649.789  | 191.117509 |
| POS00738 | 1868490.503 | 1267768.302 | -0.55958 | 0.021755 | 0.2452 | 0.65475 | Quite                                         | -22.269903 | - | - | - | 647.4955 | 193.169597 |
| POS00739 | 2362672.095 | 1619418.698 | -0.54494 | 0.108439 | 0.4185 | 0.60916 | Calcium peroxide                              | 0.1772543  | - | - | - | 646.8305 | 73.0840894 |
| POS00741 | 1546025.628 | 1100651.855 | -0.49021 | 0.041823 | 0.3006 | 0.55143 | Methyl (2-propenylthio)selenide               | 4.4780458  | - | - | - | 646.023  | 168.138025 |
| POS00760 | 924252.4637 | 908903.5476 | -0.02416 | 0.8688   | 0.941  | 0.00741 | 2-Amino-5-(5-nitro-2-furyl)-1,3,4-thiadiazole | 11.253688  | - | - | - | 642.086  | 213.195664 |
| POS00761 | 1804841.421 | 2097528.735 | 0.216818 | 0.679271 | 0.8418 | 0.14726 | 1,7-diphospho-1-epi-valienol                  | 20.80426   | - | - | - | 642.08   | 337.141269 |
| POS00762 | 590781.3824 | 731718.8966 | 0.308665 | 0.448496 | 0.7027 | 0.20976 | D-Ribitol 5-phosphate                         | -22.116715 | - | - | - | 641.966  | 233.127843 |
| POS00767 | 2417741.199 | 1514578.908 | -0.67474 | 0.030386 | 0.2685 | 0.75416 | 2-Aminoethyl diphenylborite                   | 24.983034  | - | - | - | 640.757  | 226.1068   |
| POS00774 | 462974.8178 | 334618.1956 | -0.46842 | 0.003893 | 0.1351 | 0.33105 | Nicotinurate                                  | 9.0343787  | - | - | - | 638.791  | 181.169604 |
| POS00780 | 2577152.518 | 1971216.537 | -0.38669 | 0.290706 | 0.6051 | 0.41816 | 3-(Phosphoacetylamido)-L-alanine              | 8.8658717  | - | - | - | 637.48   | 243.133223 |
| POS00783 | 1014146.953 | 746087.6256 | -0.44285 | 0.087594 | 0.3867 | 0.3897  | Citrate                                       | 12.828976  | - | - | - | 637.156  | 193.133241 |
| POS00786 | 637597.3548 | 682664.0132 | 0.09853  | 0.850022 | 0.9322 | 0.03337 | [5-(Aminomethyl)furan-3-yl]methyl phosphate   | 21.449061  | - | - | - | 636.833  | 208.132819 |
| POS00797 | 391466.7749 | 361803.0098 | -0.11369 | 0.368207 | 0.6475 | 0.07967 | Apraclonidine                                 | -16.501757 | - | - | - | 631.7645 | 246.111732 |
| POS00800 | 430513.8245 | 255858.1391 | -0.75072 | 0.192409 | 0.519  | 0.29156 | Aminopyrrolnitrin                             | 16.675885  | - | - | - | 630.952  | 228.100964 |
| POS00801 | 607803.0242 | 508138.3403 | -0.25838 | 0.012743 | 0.21   | 0.2706  | O-Phospho-4-hydroxy-L-threonine               | -20.088834 | - | - | - | 630.812  | 216.101456 |
| POS00821 | 200042569.9 | 53342516.46 | -1.90695 | 0.17008  | 0.4966 | 8.36739 | Trifluoromethyl-bismethyl ketone              | 16.490393  | - | - | - | 626.8975 | 141.113287 |
| POS00825 | 21493761.72 | 47677811.27 | 1.1494   | 0.23222  | 0.553  | 3.50623 | Calcium hydroxide                             | -4.6307956 | - | - | - | 626.674  | 75.0996335 |
| POS00828 | 8872174.616 | 6600404.96  | -0.42673 | 0.448417 | 0.7027 | 0.69675 | Sepiapterin                                   | 19.10508   | - | - | - | 626.1615 | 238.227109 |
| POS00835 | 1106763.422 | 784711.2604 | -0.49611 | 0.004217 | 0.1383 | 0.52002 | SQ 26180                                      | 19.994213  | - | - | - | 625.569  | 239.23044  |
| POS00838 | 1894701.345 | 946283.8773 | -1.00163 | 0.00356  | 0.1278 | 0.9219  | Dimefox                                       | -9.2571137 | - | - | - | 625.368  | 155.12885  |

|          |             |             |          |          |        |         |                                               |            |   |   |   |          |            |
|----------|-------------|-------------|----------|----------|--------|---------|-----------------------------------------------|------------|---|---|---|----------|------------|
| POS00847 | 3268112.145 | 2638534.754 | -0.30872 | 0.582128 | 0.7874 | 0.28113 | (S)-Dihydroorotate                            | 8.2992333  | - | - | - | 624.472  | 159.120689 |
| POS00852 | 2080962.184 | 1718362.915 | -0.27622 | 0.389957 | 0.6601 | 0.28768 | Methyl (2-propenylthio)selenide               | 4.373977   | - | - | - | 624.155  | 168.138008 |
| POS00855 | 5250672.24  | 8471742.491 | 0.690157 | 0.112024 | 0.4244 | 1.14366 | 1,3,7-Trimethyluric acid                      | 9.5043021  | - | - | - | 624.129  | 211.199274 |
| POS00867 | 1282127.05  | 1173377.167 | -0.12787 | 0.790219 | 0.9034 | 0.13114 | 5-Amino-4-imidazolecarboxamide                | -9.1634938 | - | - | - | 623.454  | 127.122721 |
| POS00869 | 4552425.59  | 2343208.961 | -0.95815 | 0.036571 | 0.2867 | 1.23151 | 3-Nitroacrylate                               | -21.460847 | - | - | - | 623.3055 | 118.064964 |
| POS00871 | 1533065.882 | 809844.7496 | -0.9207  | 0.001866 | 0.0969 | 0.78057 | Dopaquinone                                   | 5.7715595  | - | - | - | 623.172  | 196.180503 |
| POS00876 | 349243.4834 | 327411.747  | -0.09313 | 0.738616 | 0.8763 | 0.03165 | Boc-Asn-OPhNO2                                | 1.7999921  | - | - | - | 623.107  | 354.335213 |
| POS00879 | 12477177.11 | 11558596.25 | -0.11033 | 0.69717  | 0.851  | 0.4192  | N,N'-dinitrosopiperazine                      | 15.789293  | - | - | - | 622.834  | 145.141452 |
| POS00888 | 3817599.429 | 2148136.762 | -0.82958 | 0.223506 | 0.5454 | 0.84874 | Glyphosate-isopropylammonium                  | -0.5550311 | - | - | - | 621.993  | 229.19045  |
| POS00894 | 7416700.44  | 4355170.314 | -0.76805 | 0.316618 | 0.6253 | 0.9851  | Phosphoagmatine                               | 6.2609087  | - | - | - | 621.833  | 211.179992 |
| POS00897 | 2606100.955 | 1139811.522 | -1.1931  | 0.025601 | 0.2569 | 1.07053 | 5-O-Methyl-myo-inositol                       | -23.60385  | - | - | - | 621.6745 | 195.185193 |
| POS00899 | 1945877.258 | 1939920.077 | -0.00442 | 0.988907 | 0.9942 | 0.03065 | 2-Amino-5-(5-nitro-2-furyl)-1,3,4-thiadiazole | 11.076017  | - | - | - | 621.534  | 213.195627 |
| POS00901 | 15292041.73 | 19224843.9  | 0.330191 | 0.629404 | 0.8159 | 1.20462 | Maleimide                                     | -1.5445643 | - | - | - | 621.5145 | 98.0792267 |
| POS00907 | 848861.7927 | 1967737.335 | 1.212936 | 0.095098 | 0.399  | 0.80464 | 2-Aminophenoxazin-3-one                       | 16.466744  | - | - | - | 621.5025 | 213.214871 |
| POS00909 | 8236402.461 | 4178650.806 | -0.97898 | 0.045535 | 0.3123 | 1.6415  | Calcium peroxide                              | 0.0516828  | - | - | - | 621.4805 | 73.0840803 |
| POS00915 | 2211474.767 | 1151202.938 | -0.94187 | 0.055438 | 0.3276 | 0.81818 | Calcium formate                               | -18.471167 | - | - | - | 621.184  | 131.117773 |
| POS00923 | 8210868.496 | 6053808.813 | -0.43969 | 0.314558 | 0.6243 | 0.96118 | Cytosine                                      | 24.276971  | - | - | - | 620.851  | 112.111974 |
| POS00926 | 16970407.35 | 7201324.987 | -1.23669 | 0.375248 | 0.6505 | 1.42985 | 5-Hydroxypyrazinamide                         | 5.2234639  | - | - | - | 620.845  | 140.120103 |
| POS00928 | 79471857.53 | 61112544.61 | -0.37898 | 0.847886 | 0.9313 | 1.90598 | 6-Thiourate                                   | 1.2482792  | - | - | - | 620.675  | 185.183407 |
| POS00934 | 681893.3667 | 558454.961  | -0.28811 | 0.055714 | 0.3276 | 0.28385 | Calcium L-aspartate                           | -16.550773 | - | - | - | 620.5265 | 172.169244 |
| POS00936 | 4453728.637 | 1377172.948 | -1.6933  | 0.083777 | 0.3808 | 1.37088 | Quite                                         | -22.457323 | - | - | - | 620.349  | 193.169561 |
| POS00938 | 3220283.828 | 4023108.563 | 0.321123 | 0.801516 | 0.9096 | 0.19961 | L-Serine O-sulfate                            | -9.1385044 | - | - | - | 620.214  | 186.161385 |
| POS00939 | 1994468.934 | 2052140.616 | 0.041125 | 0.935516 | 0.9711 | 0.03579 | Didecyldimethylammonium chloride              | 8.0852325  | - | - | - | 620.214  | 363.086404 |

|          |             |             |          |          |        |         |  |                                                              |            |   |   |   |          |            |
|----------|-------------|-------------|----------|----------|--------|---------|--|--------------------------------------------------------------|------------|---|---|---|----------|------------|
| POS00941 | 5663153.086 | 5326794.237 | -0.08834 | 0.903224 | 0.9553 | 0.14483 |  | Methamidophos                                                | -5.583809  | - | - | - | 620.2045 | 142.135689 |
| POS00959 | 5205296.624 | 2848271.763 | -0.86989 | 0.045882 | 0.3134 | 1.1924  |  | L-Hexanydro-5-imino-1,2,4-oxadiazepine-3-carboxylic acid     | 10.53518   | - | - | - | 619.394  | 160.152253 |
| POS00967 | 727358.9648 | 1405801.989 | 0.950654 | 0.193991 | 0.5197 | 0.58401 |  | Pelargonidin 3-O-(6-O-malonyl-beta-D-glucoside)              | -9.2246075 | - | - | - | 618.252  | 520.434085 |
| POS00980 | 28909.2634  | 49061.26132 | 0.763052 | 0.101121 | 0.4075 | 0.1146  |  | Carboplatin                                                  | -16.499513 | - | - | - | 617.486  | 372.255151 |
| POS00993 | 877337.9924 | 845703.0598 | -0.05298 | 0.874159 | 0.9444 | 0.00976 |  | Bromoxynil                                                   | 3.5145176  | - | - | - | 615.634  | 277.92105  |
| POS00994 | 1463422.557 | 1738018.199 | 0.248097 | 0.310067 | 0.6214 | 0.23527 |  | 3-(Phosphoacetylamido)-L-alanine                             | 8.788612   | - | - | - | 615.6055 | 243.133205 |
| POS01019 | 395252.1682 | 388514.5379 | -0.0248  | 0.860811 | 0.9368 | 0.00797 |  | 3-oxobrimonidine                                             | 15.442924  | - | - | - | 613.316  | 311.162066 |
| POS01033 | 763634.5552 | 937486.369  | 0.295915 | 0.294473 | 0.6086 | 0.23968 |  | Violacene                                                    | -0.9876213 | - | - | - | 612.303  | 355.933126 |
| POS01047 | 794909.3348 | 705783.5971 | -0.17156 | 0.41605  | 0.679  | 0.1921  |  | Adenylylselete                                               | -0.9398356 | - | - | - | 609.511  | 475.186231 |
| POS01089 | 3323836.846 | 3020411.429 | -0.1381  | 0.661428 | 0.8332 | 0.21855 |  | Bromoxynil                                                   | 3.7684858  | - | - | - | 601.039  | 277.92112  |
| POS01098 | 750187.5911 | 639235.5469 | -0.2309  | 0.210988 | 0.5344 | 0.24358 |  | 4-Chloromethandienone                                        | -23.589269 | - | - | - | 598.559  | 335.879377 |
| POS01126 | 1558272.031 | 1046931.577 | -0.57378 | 0.264057 | 0.5803 | 0.44363 |  | 9-Chloro-11beta,17beta-dihydroxy-17-methylandroct-4-en-3-one | 11.229488  | - | - | - | 592.348  | 353.906739 |
| POS01136 | 172381.4397 | 88107.95453 | -0.96826 | 0.011537 | 0.2016 | 0.27235 |  | Triphosphate                                                 | 1.418502   | - | - | - | 591.0775 | 253.922935 |
| POS01140 | 826698.1913 | 644773.9741 | -0.35857 | 0.102938 | 0.4094 | 0.33147 |  | Phosfolan                                                    | -11.112482 | - | - | - | 590.213  | 256.29914  |
| POS01142 | 1708209.531 | 1369934.643 | -0.31838 | 0.030023 | 0.2685 | 0.46921 |  | 3-Dehydroquite                                               | -21.346857 | - | - | - | 590.098  | 191.153917 |
| POS01146 | 2463671.041 | 2276143.572 | -0.11422 | 0.245908 | 0.564  | 0.21445 |  | Cryptocyanin                                                 | 14.694545  | - | - | - | 589.6775 | 481.398236 |
| POS01148 | 117704.6243 | 87321.48509 | -0.43076 | 0.011843 | 0.2036 | 0.15386 |  | Chlorquinox                                                  | -16.27029  | - | - | - | 589.2735 | 268.929817 |
| POS01149 | 89100.35768 | 70337.10505 | -0.34115 | 0.149837 | 0.4753 | 0.10675 |  | 3,5-Dibromo-4-hydroxybenzamide                               | -6.7136698 | - | - | - | 589.108  | 295.933397 |
| POS01155 | 88460.90747 | 61522.6179  | -0.52392 | 0.021188 | 0.2424 | 0.15088 |  | Ioxynil                                                      | -5.8916115 | - | - | - | 588.8215 | 371.918891 |
| POS01156 | 1240287.361 | 1045629.378 | -0.2463  | 0.057977 | 0.3334 | 0.34244 |  | 1N-(2,3-Dihydroxybenzoyl)-L-serine                           | 6.4351752  | - | - | - | 588.7615 | 242.206229 |
| POS01158 | 8446921.389 | 6935637.158 | -0.2844  | 0.015506 | 0.2226 | 1.01823 |  | Cyazine                                                      | 19.811771  | - | - | - | 588.734  | 241.704745 |
| POS01185 | 105022.5329 | 86079.35954 | -0.28696 | 0.1395   | 0.4626 | 0.09578 |  | 5-Hydroxyxanthotoxin                                         | 19.398163  | - | - | - | 585.508  | 233.200681 |
| POS01187 | 1106877.032 | 648787.9389 | -0.77068 | 0.015938 | 0.2226 | 0.56218 |  | 4-Bromophenylacetate                                         | 18.65863   | - | - | - | 585.182  | 216.055289 |

|          |             |             |          |          |        |         |                                                                       |            |   |   |   |          |            |
|----------|-------------|-------------|----------|----------|--------|---------|-----------------------------------------------------------------------|------------|---|---|---|----------|------------|
| POS01198 | 214111.4065 | 166389.5112 | -0.3638  | 0.181507 | 0.5069 | 0.13638 | Nicotinurate                                                          | 8.9539284  | - | - | - | 583.44   | 181.16959  |
| POS01200 | 1547437.218 | 1582861.589 | 0.032654 | 0.976442 | 0.9886 | 0.00874 | 4-Pyridoxate                                                          | 4.1795161  | - | - | - | 583.091  | 184.169442 |
| POS01210 | 1730403.225 | 1662259.181 | -0.05796 | 0.685688 | 0.8454 | 0.14217 | Violacene                                                             | -1.1228301 | - | - | - | 582.285  | 355.933078 |
| POS01217 | 106975.6401 | 96317.90621 | -0.15141 | 0.178507 | 0.5048 | 0.06851 | Butefine hydrochloride                                                | 9.226062   | - | - | - | 581.503  | 354.938642 |
| POS01240 | 1149760.168 | 787422.6851 | -0.54612 | 0.091055 | 0.3913 | 0.47427 | (1S,5R)-5-(2,2-dichloroethenyl)-2,2-dimethylpyrrolidine-3-carboxamide | -18.300271 | - | - | - | 580.477  | 210.073251 |
| POS01241 | 11622694.94 | 12326764.77 | 0.08485  | 0.756743 | 0.8869 | 0.34752 | Cyanidin                                                              | 3.559275   | - | - | - | 580.441  | 288.252499 |
| POS01244 | 428034.5745 | 305353.7353 | -0.48725 | 0.033587 | 0.2804 | 0.30476 | Polixetonium chloride                                                 | 14.502323  | - | - | - | 580.122  | 326.207993 |
| POS01245 | 1870989.524 | 2006315.961 | 0.100747 | 0.668343 | 0.8368 | 0.19083 | Dihydrokaempferol                                                     | -12.7142   | - | - | - | 580.106  | 289.255812 |
| POS01263 | 8113329.713 | 4241031.518 | -0.93588 | 0.386127 | 0.6583 | 1.13731 | Calcium formate                                                       | -18.232702 | - | - | - | 578.2345 | 131.117804 |
| POS01272 | 163648.9836 | 135487.2506 | -0.27245 | 0.355776 | 0.6395 | 0.09405 | Salvarsan                                                             | -16.632645 | - | - | - | 576.545  | 440.000975 |
| POS01278 | 2975634.492 | 1973551.672 | -0.5924  | 0.104626 | 0.4116 | 0.80864 | Monobasic calcium phosphate                                           | 2.490699   | - | - | - | 576.216  | 235.06036  |
| POS01283 | 56695669.8  | 52786993.88 | -0.10306 | 0.591417 | 0.7918 | 0.84186 | Bromobenzene                                                          | -18.227198 | - | - | - | 576.16   | 158.012315 |
| POS01311 | 1128521.168 | 1118197.023 | -0.01326 | 0.963613 | 0.983  | 0.00838 | 3-Methyleneoxindole                                                   | -1.4600626 | - | - | - | 574.448  | 146.165065 |
| POS01313 | 805790.2272 | 755922.9407 | -0.09217 | 0.535773 | 0.7591 | 0.09376 | Sulfluramid                                                           | -16.565122 | - | - | - | 574.4015 | 528.196544 |
| POS01321 | 3411992.939 | 2901676.772 | -0.23373 | 0.49929  | 0.7362 | 0.38959 | cis-Aconitate                                                         | 18.979593  | - | - | - | 573.806  | 175.118781 |
| POS01333 | 1379108.776 | 1249117.613 | -0.14283 | 0.778322 | 0.8983 | 0.13102 | Nornitrogen mustard                                                   | 8.9385357  | - | - | - | 572.814  | 143.035546 |
| POS01348 | 3954588.77  | 2087678.32  | -0.92163 | 0.155803 | 0.4841 | 0.85056 | Lamotrigine                                                           | 2.2898965  | - | - | - | 569.9005 | 257.098863 |
| POS01404 | 4848229.982 | 1726308.629 | -1.48977 | 0.076758 | 0.3704 | 1.44308 | Calcium formate                                                       | -18.202699 | - | - | - | 532.867  | 131.117808 |
| POS01405 | 629144.7284 | 550113.0962 | -0.19366 | 0.534606 | 0.7588 | 0.11117 | Nornitrogen mustard                                                   | 8.856679   | - | - | - | 532.004  | 143.035534 |
| POS01419 | 1450442.663 | 1147078.723 | -0.33853 | 0.033851 | 0.2807 | 0.46346 | Monobasic calcium phosphate                                           | 2.4798022  | - | - | - | 526.802  | 235.060357 |
| POS01427 | 553159.3454 | 607819.315  | 0.135947 | 0.502131 | 0.7383 | 0.11675 | 3-Methyleneoxindole                                                   | -1.3957891 | - | - | - | 523.752  | 146.165074 |
| POS01435 | 1821759.026 | 1636177.868 | -0.155   | 0.721008 | 0.8658 | 0.2121  | Lamotrigine                                                           | 2.2763897  | - | - | - | 522.577  | 257.09886  |
| POS01451 | 5787828.529 | 5121622.465 | -0.17642 | 0.799345 | 0.9083 | 0.11835 | cis-Aconitate                                                         | 19.061898  | - | - | - | 519.8195 | 175.118795 |

|          |             |             |          |          |        |         |                                      |            |   |   |   |          |            |
|----------|-------------|-------------|----------|----------|--------|---------|--------------------------------------|------------|---|---|---|----------|------------|
| POS01485 | 757408.1313 | 403369.735  | -0.90897 | 0.026804 | 0.2585 | 0.49325 | Nornitrogen mustard                  | 8.9664587  | - | - | - | 490.388  | 143.03555  |
| POS01489 | 960720.3874 | 311181.3055 | -1.62636 | 0.29368  | 0.6082 | 0.53166 | N-Methylethanolamine phosphate       | 13.449634  | - | - | - | 489.405  | 156.098962 |
| POS01503 | 2039702.243 | 988900.9411 | -1.04446 | 0.000492 | 0.0721 | 1.00269 | Calcium formate                      | -18.145313 | - | - | - | 486.532  | 131.117816 |
| POS01530 | 519032.6346 | 745035.7312 | 0.521484 | 0.163109 | 0.4904 | 0.33852 | 3-Methyleneoxindole                  | -1.4201268 | - | - | - | 482.6175 | 146.16507  |
| POS01537 | 952746.8364 | 691508.8622 | -0.46235 | 0.15718  | 0.4856 | 0.36871 | Lamotrigine                          | 2.2296927  | - | - | - | 480.916  | 257.098848 |
| POS01559 | 6001674.174 | 3709183.823 | -0.69426 | 0.142931 | 0.4676 | 1.03496 | Cyazine                              | 20.044871  | - | - | - | 472.784  | 241.704801 |
| POS01566 | 2718972.526 | 1166547.417 | -1.22082 | 0.008578 | 0.1899 | 1.12408 | Calcium formate                      | -18.274652 | - | - | - | 468.962  | 131.117799 |
| POS01592 | 836140.3624 | 680578.2648 | -0.29698 | 0.031292 | 0.2723 | 0.3107  | Lamotrigine                          | 2.0297416  | - | - | - | 457.693  | 257.098796 |
| POS01596 | 1030322.791 | 745183.9531 | -0.46743 | 0.113089 | 0.4262 | 0.37733 | Violacene                            | -1.2241182 | - | - | - | 455.036  | 355.933042 |
| POS01629 | 713103.051  | 796814.1112 | 0.160133 | 0.542731 | 0.7639 | 0.13656 | 3-Methyleneoxindole                  | -1.495943  | - | - | - | 440.267  | 146.165059 |
| POS01636 | 2359168.62  | 1299740.218 | -0.86006 | 0.032958 | 0.2781 | 0.90412 | Calcium formate                      | -18.230362 | - | - | - | 438.427  | 131.117805 |
| POS01639 | 748125.7201 | 685505.9736 | -0.12611 | 0.647311 | 0.8267 | 0.15195 | Lamotrigine                          | 2.1109042  | - | - | - | 437.613  | 257.098817 |
| POS01670 | 5800336.829 | 4252696.793 | -0.44776 | 0.002769 | 0.1143 | 1.16347 | Paramethadione                       | -8.8067604 | - | - | - | 424.2485 | 158.172992 |
| POS01676 | 119271.5701 | 103817.4917 | -0.2002  | 0.511121 | 0.7452 | 0.05628 | erythro-6,8-Dotriacontanediol        | -2.388974  | - | - | - | 423.5575 | 483.871323 |
| POS01679 | 51289.34798 | 54426.57786 | 0.085652 | 0.774241 | 0.896  | 0.01929 | Octachlorocamphene                   | 20.664626  | - | - | - | 423.191  | 412.810286 |
| POS01689 | 460976.3626 | 436437.8909 | -0.07892 | 0.689709 | 0.8466 | 0.05084 | Tiracizine                           | 4.9760744  | - | - | - | 422.814  | 404.911286 |
| POS01701 | 348364.7875 | 310512.6894 | -0.16595 | 0.220669 | 0.5419 | 0.12352 | 1,2,3,5-Tetrachloro-4-methoxybenzene | -9.6749845 | - | - | - | 422.4755 | 246.922897 |
| POS01703 | 63444.88154 | 58852.69607 | -0.1084  | 0.574292 | 0.7821 | 0.03312 | Tetrachloro-cis,cis-mucote           | 4.8567315  | - | - | - | 422.469  | 280.898336 |
| POS01716 | 372696.7134 | 338016.3734 | -0.14091 | 0.46598  | 0.7151 | 0.09104 | Ziram                                | 5.2123764  | - | - | - | 422.448  | 306.850771 |
| POS01722 | 152081.5451 | 140584.7963 | -0.1134  | 0.413853 | 0.6778 | 0.06161 | Dimeflin hydrochloride               | 2.1865628  | - | - | - | 422.4435 | 360.854663 |
| POS01730 | 86266.21815 | 82859.56631 | -0.05813 | 0.717364 | 0.8633 | 0.01285 | Trisalicilate-choline                | 6.341946   | - | - | - | 422.439  | 540.8247   |
| POS01736 | 180533.4111 | 153073.1992 | -0.23804 | 0.081495 | 0.378  | 0.1164  | Haloperidol                          | -5.2536118 | - | - | - | 422.4355 | 376.869502 |
| POS01751 | 1170303.523 | 1443123.221 | 0.302312 | 0.321336 | 0.6288 | 0.30818 | 1,7-diphospho-1-epi-valienol         | 21.066155  | - | - | - | 422.269  | 337.141358 |



|          |             |             |          |          |        |         |                                                                     |            |   |   |   |          |            |
|----------|-------------|-------------|----------|----------|--------|---------|---------------------------------------------------------------------|------------|---|---|---|----------|------------|
| POS01757 | 588901.0607 | 518509.0721 | -0.18366 | 0.137297 | 0.4604 | 0.19054 | Chlorpromazine                                                      | 21.733443  | - | - | - | 422.243  | 319.878407 |
| POS01759 | 26971.76546 | 26162.38997 | -0.04396 | 0.886923 | 0.9486 | 0.00649 | N-Acetyl-leu-leu-leu-tyr-<br>amide                                  | -13.720481 | - | - | - | 422.183  | 562.71297  |
| POS01760 | 65496.91329 | 70105.79464 | 0.098107 | 0.580207 | 0.7858 | 0.03245 | 20,20-Dihydroxy-20-(2-<br>chloro-2-hydroxy-2-<br>methylbutanoyloxy) | -10.666105 | - | - | - | 422.155  | 417.89583  |
| POS01774 | 191290.2008 | 177008.6567 | -0.11194 | 0.445388 | 0.7005 | 0.06225 | Chlorphonium chloride                                               | 7.4813503  | - | - | - | 422.1105 | 398.800353 |
| POS01777 | 153360.0841 | 131653.0476 | -0.22018 | 0.156945 | 0.4851 | 0.10306 | Gravacridonolchlorine                                               | 23.054976  | - | - | - | 422.0995 | 376.818941 |
| POS01779 | 94608.08937 | 88228.65638 | -0.10072 | 0.685426 | 0.8454 | 0.03156 | Ochratoxin A                                                        | -6.5917801 | - | - | - | 422.0915 | 404.817615 |
| POS01780 | 56374.36435 | 58813.65555 | 0.061112 | 0.7498   | 0.8827 | 0.02328 | Triacontan-1-ol                                                     | 16.331233  | - | - | - | 422.0915 | 439.827143 |
| POS01784 | 30236.1491  | 37116.37285 | 0.295781 | 0.173008 | 0.4988 | 0.06021 | Costatone                                                           | -20.788558 | - | - | - | 422.081  | 395.914167 |
| POS01789 | 432914.4885 | 376738.3093 | -0.20052 | 0.323656 | 0.6304 | 0.13336 | 3-Methyleneoxindole                                                 | -1.4326198 | - | - | - | 420.7685 | 146.165069 |
| POS01790 | 227867.4787 | 233554.9017 | 0.035567 | 0.816712 | 0.9165 | 0.02425 | Azaserine                                                           | 4.5352251  | - | - | - | 419.547  | 174.134862 |
| POS01792 | 318463.8552 | 221168.7612 | -0.52598 | 0.00083  | 0.0732 | 0.30709 | Nornitrogen mustard                                                 | 8.7932341  | - | - | - | 418.0935 | 143.035525 |
| POS01805 | 534452.242  | 494879.9498 | -0.11098 | 0.517041 | 0.7485 | 0.08369 | Lamotrigine                                                         | 2.1081404  | - | - | - | 414.48   | 257.098816 |
| POS01816 | 363260.6064 | 236110.8564 | -0.62154 | 0.000578 | 0.0721 | 0.34653 | Glyphosate-<br>isopropylammonium                                    | 0.0121391  | - | - | - | 411.6785 | 229.190579 |
| POS01820 | 568270.0488 | 430560.605  | -0.40036 | 0.250214 | 0.568  | 0.25189 | N-(2R-<br>Hydroxyhexadecanoyl)-<br>2S-amine, O-methyl               | 12.557742  | - | - | - | 411.244  | 566.925183 |
| POS01839 | 891418.0838 | 863819.5046 | -0.04537 | 0.766953 | 0.8917 | 0.06157 | Violacene                                                           | -1.193704  | - | - | - | 409.414  | 355.933053 |
| POS01867 | 395898.4056 | 264748.9121 | -0.58051 | 0.002943 | 0.117  | 0.34614 | Nornitrogen mustard                                                 | 8.8173408  | - | - | - | 405.411  | 143.035529 |
| POS01878 | 851097.1698 | 733527.6072 | -0.21447 | 0.059602 | 0.3364 | 0.26053 | Calcium oxalate                                                     | -17.257966 | - | - | - | 401.1    | 129.102066 |
| POS01879 | 2148688.519 | 1182266.153 | -0.8619  | 0.002696 | 0.1131 | 0.92408 | Calcium formate                                                     | -18.272055 | - | - | - | 400.359  | 131.117799 |
| POS01890 | 910655.0819 | 969297.2013 | 0.090034 | 0.725722 | 0.8684 | 0.13517 | 1,7-diphospho-1-epi-<br>valienol                                    | 21.015493  | - | - | - | 392.318  | 337.14134  |
| POS01894 | 54026.31457 | 49325.70525 | -0.13132 | 0.380705 | 0.6544 | 0.03686 | PC(P-16:0/P-16:0)                                                   | 0.1398289  | - | - | - | 392.067  | 703.062375 |
| POS01899 | 1166207.768 | 589175.8491 | -0.98505 | 0.172976 | 0.4988 | 0.47717 | Lamotrigine                                                         | 2.1794174  | - | - | - | 392.059  | 257.098835 |
| POS01900 | 175461.2956 | 162244.4551 | -0.11298 | 0.410399 | 0.6752 | 0.05734 | Cer(d18:1/22:1(13Z))                                                | 14.080722  | - | - | - | 392.055  | 621.060307 |
| POS01912 | 835454.0656 | 750199.0159 | -0.15529 | 0.19261  | 0.519  | 0.181   | Didecyldimethylammoniu<br>m chloride                                | 12.834907  | - | - | - | 392.0355 | 363.088124 |

|          |             |             |          |          |        |         |                                                                                                             |            |   |   |   |          |            |
|----------|-------------|-------------|----------|----------|--------|---------|-------------------------------------------------------------------------------------------------------------|------------|---|---|---|----------|------------|
| POS01914 | 59435.25753 | 56358.57075 | -0.07668 | 0.689783 | 0.8466 | 0.01302 | alpha-D-ribose 1-methylphosphate 5-trisaccharate                                                            | -18.659673 | - | - | - | 392.035  | 469.075242 |
| POS01916 | 262695.309  | 223448.9802 | -0.23344 | 0.072143 | 0.3613 | 0.15024 | Monobasic calcium phosphate                                                                                 | 2.6945022  | - | - | - | 392.03   | 235.060407 |
| POS01919 | 159091.6844 | 159684.7422 | 0.005368 | 0.9639   | 0.983  | 0.0015  | 8-Br-cGMP                                                                                                   | 8.4568321  | - | - | - | 392.0285 | 425.112263 |
| POS01930 | 800554.1976 | 783011.6263 | -0.03197 | 0.798078 | 0.908  | 0.03477 | Dibromobisphenol A                                                                                          | 0.3928625  | - | - | - | 392.0255 | 387.085928 |
| POS01936 | 108248.4584 | 112200.5176 | 0.051733 | 0.909869 | 0.9581 | 0.02626 | (1S,3R)-5-(2,2-dichloroethenyl)-2,2-dimethylcyclopropanecarboxylic acid                                     | -17.318251 | - | - | - | 392.024  | 210.073456 |
| POS01962 | 36914.68327 | 41962.87982 | 0.184919 | 0.435909 | 0.6938 | 0.04134 | Sulfluramid                                                                                                 | -16.511405 | - | - | - | 391.959  | 528.196572 |
| POS01967 | 56876.08886 | 60722.69397 | 0.094414 | 0.539661 | 0.7617 | 0.02836 | alpha-D-ribose 1-methylphosphate 5-trisaccharate                                                            | 10.915038  | - | - | - | 391.782  | 469.089086 |
| POS01972 | 859609.4632 | 967467.6474 | 0.170532 | 0.552617 | 0.7706 | 0.17905 | Violacene                                                                                                   | -1.1514776 | - | - | - | 391.0945 | 355.933068 |
| POS01977 | 21465.60537 | 23353.61691 | 0.121619 | 0.591275 | 0.7918 | 0.02039 | 2-Hydroxy-6-oxo-2,4-diene-1,9-dioate                                                                        | -19.55625  | - | - | - | 389.4885 | 215.175188 |
| POS02011 | 123235.7328 | 118456.5539 | -0.05706 | 0.806138 | 0.9116 | 0.03532 | 3-hydroxy-2-isobutyrate                                                                                     | 14.974815  | - | - | - | 378.159  | 104.10682  |
| POS02017 | 283978.0712 | 212381.8601 | -0.41912 | 0.051506 | 0.3205 | 0.20763 | D-Erythritol 4-phosphate                                                                                    | -22.592628 | - | - | - | 374.193  | 203.102411 |
| POS02018 | 755168.8191 | 635985.9105 | -0.2478  | 0.14149  | 0.4653 | 0.23951 | Lamotrigine                                                                                                 | 2.1788241  | - | - | - | 374.0415 | 257.098835 |
| POS02022 | 966413.5695 | 714098.2573 | -0.43652 | 0.322076 | 0.629  | 0.30124 | 1,7-diphospho-1-epivalienol                                                                                 | 20.889698  | - | - | - | 370.264  | 337.141298 |
| POS02029 | 66371.81881 | 61857.80573 | -0.10162 | 0.554811 | 0.7716 | 0.02217 | 2-Oxoglutaramate                                                                                            | -22.616064 | - | - | - | 368.225  | 146.117395 |
| POS02034 | 145931.682  | 140277.9713 | -0.057   | 0.761942 | 0.8889 | 0.02531 | 5a,11a-Dehydrochlorotetracycline                                                                            | 24.274233  | - | - | - | 367.324  | 477.882552 |
| POS02039 | 1050321.201 | 950235.7372 | -0.14447 | 0.838131 | 0.9265 | 0.04614 | 5-FU                                                                                                        | -23.24485  | - | - | - | 365.659  | 131.081453 |
| POS02045 | 579338.9402 | 653252.5476 | 0.173233 | 0.625427 | 0.8135 | 0.12236 | N-(2R-Hydroxyhexadecanoyl)-2S-(1S,3R)-5-methyl-2,2-dichloroethenyl)-2,2-dimethylcyclopropanecarboxylic acid | 12.649488  | - | - | - | 364.6975 | 566.925235 |
| POS02055 | 122171.0467 | 69782.24995 | -0.80797 | 0.031637 | 0.2738 | 0.19003 | Dichloroethenyl)-2,2-dimethylcyclopropanecarboxylic acid                                                    | -7.2305712 | - | - | - | 364.058  | 210.075565 |
| POS02060 | 2794762     | 2541661.956 | -0.13695 | 0.620238 | 0.8112 | 0.21811 | Violacene                                                                                                   | -1.3816633 | - | - | - | 363.471  | 355.932986 |
| POS02068 | 52006727.11 | 38613626.79 | -0.42959 | 0.574326 | 0.7821 | 1.08562 | Trifluoromethyl-bismethyl ketone                                                                            | 16.640107  | - | - | - | 362.352  | 141.113308 |
| POS02070 | 1490444.769 | 1242771.376 | -0.26218 | 0.237718 | 0.5574 | 0.27689 | Dimefox                                                                                                     | -8.8450701 | - | - | - | 362.337  | 155.128913 |
| POS02076 | 14643988.51 | 9778792.614 | -0.58258 | 0.022757 | 0.2473 | 1.94132 | Cyazine                                                                                                     | 19.861931  | - | - | - | 361.67   | 241.704757 |
| POS02079 | 6105992.842 | 3026476.041 | -1.01259 | 0.004378 | 0.1402 | 1.65176 | Calcium formate                                                                                             | -18.433761 | - | - | - | 361.28   | 131.117778 |

|          |             |             |          |          |        |         |                                                         |            |   |   |   |          |            |
|----------|-------------|-------------|----------|----------|--------|---------|---------------------------------------------------------|------------|---|---|---|----------|------------|
| POS02083 | 859990.1973 | 697924.1898 | -0.30125 | 0.441596 | 0.6978 | 0.19677 | Nornitrogen mustard                                     | 8.8779523  | - | - | - | 360.229  | 143.035538 |
| POS02103 | 125228.3111 | 120395.7975 | -0.05678 | 0.876378 | 0.9452 | 0.03456 | Monobasic calcium phosphate                             | 2.710089   | - | - | - | 359.616  | 235.060411 |
| POS02110 | 1411737.495 | 1491914.663 | 0.079693 | 0.842386 | 0.928  | 0.09409 | Didecyldimethylammonium chloride                        | 13.281277  | - | - | - | 359.557  | 363.088285 |
| POS02121 | 129386.0623 | 134066.5576 | 0.051267 | 0.890109 | 0.9498 | 0.0158  | Phosphoguanidinoacetate                                 | 15.967162  | - | - | - | 359.531  | 198.096924 |
| POS02122 | 39588.49883 | 43543.39    | 0.137372 | 0.807986 | 0.9121 | 0.02025 | dCDP                                                    | -12.177007 | - | - | - | 359.521  | 388.179562 |
| POS02124 | 163944.8491 | 151744.8701 | -0.11156 | 0.766649 | 0.8917 | 0.03489 | Methylphosphote                                         | -14.492606 | - | - | - | 359.519  | 97.028285  |
| POS02131 | 408141.3802 | 426072.5276 | 0.06203  | 0.848004 | 0.9313 | 0.04329 | Dibromobisphenol A                                      | -0.0360916 | - | - | - | 359.497  | 387.085763 |
| POS02133 | 289855.4645 | 288420.6882 | -0.00716 | 0.981799 | 0.9913 | 0.00294 | alpha-D-ribose 1-methylphosphote 5-trisphosphate        | 10.495839  | - | - | - | 359.4965 | 469.088889 |
| POS02136 | 37643.03057 | 41639.52747 | 0.145571 | 0.778809 | 0.8984 | 0.02034 | 8-Br-cGMP                                               | 7.7054825  | - | - | - | 359.4935 | 425.111945 |
| POS02162 | 783292.235  | 936875.3504 | 0.258306 | 0.463184 | 0.7133 | 0.14005 | Lamotrigine                                             | 2.0523763  | - | - | - | 359.121  | 257.098802 |
| POS02167 | 103197.6599 | 88179.01421 | -0.2269  | 0.463432 | 0.7135 | 0.05177 | 4-Hydroxycyclophosphamid                                | 22.638844  | - | - | - | 357.605  | 278.098949 |
| POS02169 | 1819756.133 | 1828204.297 | 0.006682 | 0.985856 | 0.9927 | 0.05246 | L-hexanylo-5-imino-1,2,4-oxadiazepine-3-carboxylic acid | 11.238388  | - | - | - | 357.306  | 160.152365 |
| POS02172 | 1955394.542 | 1409448.323 | -0.47233 | 0.087264 | 0.3863 | 0.56164 | Calcium oxalate                                         | -17.501533 | - | - | - | 356.982  | 129.102035 |
| POS02176 | 1011233.413 | 789777.1813 | -0.3566  | 0.064798 | 0.3459 | 0.37639 | 2-Nitrofurane                                           | -12.979679 | - | - | - | 356.5825 | 114.077309 |
| POS02191 | 313024.2148 | 387846.6887 | 0.309212 | 0.370949 | 0.6495 | 0.1642  | Triphosphate                                            | 1.4845826  | - | - | - | 353.6685 | 253.922952 |
| POS02197 | 96874.93957 | 68159.1465  | -0.50722 | 0.122033 | 0.4395 | 0.11955 | Demeclocycline                                          | -21.77352  | - | - | - | 352.9935 | 465.850155 |
| POS02200 | 680318.5206 | 839853.346  | 0.303927 | 0.507399 | 0.7434 | 0.19482 | 3-Methyleneoxindole                                     | -1.4576709 | - | - | - | 352.927  | 146.165065 |
| POS02208 | 185321.173  | 219895.9796 | 0.246794 | 0.515586 | 0.7477 | 0.10011 | 50-Hydroxy-60-(5-chloro-2-hydroxy-2-methylpentanone)    | -11.214686 | - | - | - | 352.436  | 401.896781 |
| POS02224 | 235844.9946 | 239978.3698 | 0.025065 | 0.832083 | 0.9235 | 0.01905 | Lolicine A                                              | -8.9514352 | - | - | - | 351.8685 | 604.832971 |
| POS02247 | 2507391.775 | 2201352.287 | -0.1878  | 0.114037 | 0.4272 | 0.36546 | Radon-222                                               | 2.4251519  | - | - | - | 350.689  | 223.007815 |
| POS02251 | 91955.58504 | 99272.79929 | 0.110461 | 0.476733 | 0.722  | 0.04799 | Indivir                                                 | 18.695641  | - | - | - | 350.536  | 614.808252 |
| POS02252 | 206305.7303 | 181263.4806 | -0.1867  | 0.163531 | 0.4913 | 0.10782 | Leucomycin V                                            | 24.973432  | - | - | - | 350.532  | 702.866704 |
| POS02254 | 140587.0388 | 113679.9062 | -0.30649 | 0.206952 | 0.5314 | 0.11599 | Oleandomycin 2'-O-phosphate                             | -10.314352 | - | - | - | 350.528  | 768.837557 |

|          |             |             |          |          |        |         |  |                                                  |            |   |   |   |          |            |
|----------|-------------|-------------|----------|----------|--------|---------|--|--------------------------------------------------|------------|---|---|---|----------|------------|
| POS02259 | 107039.2687 | 99240.55109 | -0.10914 | 0.721653 | 0.8663 | 0.02245 |  | Clethodim                                        | 11.2254    | - | - | - | 350.523  | 360.922517 |
| POS02262 | 70837.95946 | 89935.30911 | 0.344365 | 0.046831 | 0.314  | 0.12197 |  | Rifamycin                                        | -18.408208 | - | - | - | 350.483  | 698.763032 |
| POS02269 | 149710.2186 | 153123.2713 | 0.032521 | 0.833868 | 0.9241 | 0.01727 |  | Glycylserylprolylmethionylphenylalanylvalinamide | 12.271167  | - | - | - | 350.192  | 636.790078 |
| POS02271 | 388052.224  | 382934.7598 | -0.01915 | 0.841792 | 0.9279 | 0.01751 |  | Flumiclorac pentyl                               | -16.543874 | - | - | - | 350.19   | 424.862664 |
| POS02275 | 138223.8145 | 117916.356  | -0.22924 | 0.225884 | 0.5473 | 0.08407 |  | 5,5-Deoxy-5,5-hydroperoxyfurohyperforin          | 8.0027748  | - | - | - | 350.1795 | 569.795628 |
| POS02282 | 315471.1354 | 277025.9339 | -0.18749 | 0.224682 | 0.5464 | 0.12537 |  | sn-Glycerol 3-phosphate                          | -16.91092  | - | - | - | 350.14   | 173.078067 |
| POS02287 | 114188.8435 | 124381.844  | 0.123354 | 0.423951 | 0.6843 | 0.06258 |  | Lolitrem K                                       | 3.0024506  | - | - | - | 350.0105 | 602.781283 |
| POS02290 | 321761.1176 | 249815.2985 | -0.36513 | 0.072389 | 0.3616 | 0.20888 |  | 3-(3,5-Diiodo-4-hydroxyphenyl)lactate            | -9.08741   | - | - | - | 349.901  | 434.969733 |
| POS02292 | 127511.729  | 150209.4676 | 0.236346 | 0.228697 | 0.5501 | 0.11036 |  | Arnamiol                                         | -19.762426 | - | - | - | 349.863  | 451.950365 |
| POS02293 | 117971.436  | 121957.0224 | 0.047935 | 0.718236 | 0.864  | 0.02475 |  | Aquifoliunine EIII                               | -14.816046 | - | - | - | 349.858  | 764.734961 |
| POS02294 | 209391.8445 | 199586.8047 | -0.06919 | 0.735223 | 0.8745 | 0.03467 |  | Dichlormid                                       | -14.291548 | - | - | - | 349.855  | 209.089303 |
| POS02297 | 106779.418  | 114197.8274 | 0.096902 | 0.570653 | 0.7802 | 0.04805 |  | Cholesteryl-beta-D-glucoside                     | -3.6038284 | - | - | - | 349.852  | 549.799399 |
| POS02306 | 143938.8295 | 150731.8037 | 0.066528 | 0.76484  | 0.8911 | 0.0217  |  | Veratridine                                      | 8.3128357  | - | - | - | 349.8125 | 674.803078 |
| POS02311 | 508987.2598 | 409440.1815 | -0.31398 | 0.050099 | 0.3189 | 0.25143 |  | Pavoninin I                                      | 2.4468385  | - | - | - | 349.789  | 662.874596 |
| POS02325 | 112295.2634 | 109661.8503 | -0.03424 | 0.886933 | 0.9486 | 0.01909 |  | PC(14:1(9Z)/15:0)                                | -18.781586 | - | - | - | 349.507  | 690.937518 |
| POS02330 | 475939.659  | 409255.1739 | -0.21778 | 0.036408 | 0.2865 | 0.20776 |  | Terodiline hydrochloride                         | -13.699615 | - | - | - | 349.502  | 318.898922 |
| POS02331 | 123568.9676 | 91460.53525 | -0.4341  | 0.196427 | 0.5222 | 0.11087 |  | Sodium hexafluorosilicate                        | 2.0002668  | - | - | - | 349.4965 | 189.063153 |
| POS02332 | 62723.21433 | 63258.75515 | 0.012266 | 0.956252 | 0.9806 | 0.01099 |  | Dihydrocaffeoyl-CoA                              | -0.7544598 | - | - | - | 349.4865 | 932.698674 |
| POS02334 | 71436.82216 | 102562.0986 | 0.521758 | 0.035625 | 0.285  | 0.14866 |  | Discodermolide                                   | -0.3971864 | - | - | - | 349.469  | 594.798741 |
| POS02340 | 64403.01186 | 55183.53448 | -0.22289 | 0.339929 | 0.6326 | 0.05188 |  | S-(1,2-Dichlorovinyl)-L-cysteine                 | 7.2680399  | - | - | - | 349.461  | 217.094447 |
| POS02342 | 73795.22224 | 88017.56266 | 0.254264 | 0.077048 | 0.3708 | 0.09922 |  | Dihydromethanophezine                            | -22.704936 | - | - | - | 349.439  | 541.816597 |
| POS02343 | 695754.2319 | 565174.5519 | -0.29988 | 0.0032   | 0.1215 | 0.3433  |  | Deamino-alpha-keto-demethylphosphinothricin      | 14.04576   | - | - | - | 349.432  | 167.078709 |
| POS02344 | 54987.88282 | 59384.42447 | 0.110971 | 0.671414 | 0.8378 | 0.02533 |  | Rifamycin B                                      | -9.408335  | - | - | - | 349.431  | 756.804866 |

|          |             |             |          |          |        |         |                                                                      |            |   |   |   |          |            |
|----------|-------------|-------------|----------|----------|--------|---------|----------------------------------------------------------------------|------------|---|---|---|----------|------------|
| POS02346 | 94439.3947  | 103290.8243 | 0.129251 | 0.549122 | 0.769  | 0.05026 | 3-(Methylthio)propanoyl-CoA                                          | 2.5672264  | - | - | - | 349.409  | 870.698509 |
| POS02361 | 66632.12717 | 66022.92661 | -0.01325 | 0.945519 | 0.9757 | 0.00056 | Dauricine                                                            | 20.796705  | - | - | - | 349.1695 | 625.78607  |
| POS02363 | 864201.7601 | 846943.2836 | -0.0291  | 0.777327 | 0.8978 | 0.03452 | Indoxacarb                                                           | 10.529287  | - | - | - | 349.168  | 528.847334 |
| POS02364 | 48396.0923  | 63179.30076 | 0.384561 | 0.099486 | 0.4055 | 0.10118 | 21,22-Diprenylpaxilline                                              | 12.747417  | - | - | - | 349.1645 | 572.803865 |
| POS02365 | 143912.6344 | 143154.7808 | -0.00762 | 0.978908 | 0.9898 | 0.00234 | 3,5-Dibromo-4-hydroxybenzamide                                       | -6.6681859 | - | - | - | 349.161  | 295.93341  |
| POS02368 | 289592.5971 | 246117.2434 | -0.23468 | 0.563188 | 0.7763 | 0.08438 | Tetramethylrosamine                                                  | 14.041222  | - | - | - | 349.137  | 392.92598  |
| POS02372 | 1691785.807 | 1508748.366 | -0.16519 | 0.105075 | 0.4121 | 0.29306 | Cryptocyanin                                                         | 14.305859  | - | - | - | 349.1175 | 481.398049 |
| POS02377 | 1064532.802 | 912593.9562 | -0.22218 | 0.045464 | 0.3121 | 0.31748 | Armillaramide                                                        | -22.117961 | - | - | - | 348.9795 | 556.910981 |
| POS02381 | 334526.4179 | 328571.9044 | -0.02591 | 0.781932 | 0.8995 | 0.01402 | 1,4-Dihydroxy-2-phthoyl-CoA                                          | -24.576181 | - | - | - | 348.846  | 954.681538 |
| POS02389 | 283910.9018 | 282061.7162 | -0.00943 | 0.939543 | 0.9726 | 0.00386 | 11-[(2R)-3-[2-amino-3-methyl-4-(2-methyl-1,3-thiazol-4-yl)but-2-en-1 | 21.06018   | - | - | - | 348.805  | 605.790013 |
| POS02398 | 325178.6157 | 280058.1273 | -0.21551 | 0.210411 | 0.5339 | 0.12509 | Demethylactenocin                                                    | -11.825463 | - | - | - | 348.481  | 744.87698  |
| POS02402 | 60799.70523 | 64233.35505 | 0.079258 | 0.724111 | 0.8676 | 0.02602 | DPDPE                                                                | -9.5930819 | - | - | - | 348.323  | 646.791081 |
| POS02415 | 45079.57556 | 48680.57635 | 0.110872 | 0.757994 | 0.8874 | 0.02942 | Trisalicylate-choline                                                | 12.466844  | - | - | - | 347.986  | 540.828006 |
| POS02418 | 122448.7907 | 164261.7754 | 0.423818 | 0.090004 | 0.3896 | 0.16151 | Doronine                                                             | -5.4473248 | - | - | - | 347.868  | 460.922571 |
| POS02421 | 68138.93462 | 47767.0588  | -0.51246 | 0.231375 | 0.553  | 0.08881 | Santiaguine                                                          | -19.064294 | - | - | - | 347.8605 | 593.809275 |
| POS02434 | 64252.79409 | 70622.56363 | 0.13637  | 0.622607 | 0.8124 | 0.03473 | Cimicifugoside                                                       | -20.30355  | - | - | - | 347.586  | 675.811675 |
| POS02436 | 138955.4143 | 115708.8848 | -0.26412 | 0.161388 | 0.4889 | 0.09289 | DG(14:0/20:5(5Z,8Z,11Z,14Z,17Z)/0:0)                                 | -1.061133  | - | - | - | 347.5465 | 587.891854 |
| POS02442 | 42197.7279  | 41817.99745 | -0.01304 | 0.978049 | 0.9896 | 0.00112 | 15,15'-Dihydroxy-beta-carotene                                       | 8.9646876  | - | - | - | 347.531  | 571.899694 |
| POS02458 | 84602.68426 | 51963.05693 | -0.70322 | 0.012768 | 0.21   | 0.15028 | Glyburide                                                            | -2.884104  | - | - | - | 347.213  | 495.009352 |
| POS02460 | 129563.2956 | 152383.3942 | 0.234049 | 0.315857 | 0.625  | 0.09492 | 1,1-(1,4-Dihydro-4-nonyl-3,5-pyridinediyl)bis[1-decanol              | 11.184046  | - | - | - | 347.2125 | 516.866646 |
| POS02463 | 69640.79875 | 88160.69464 | 0.340203 | 0.316814 | 0.6253 | 0.08634 | Acetrizic acid                                                       | -3.2533394 | - | - | - | 347.21   | 557.867765 |
| POS02465 | 202136.0426 | 207815.3829 | 0.039976 | 0.820032 | 0.9178 | 0.03317 | 2S-trans-p-Coumaroyloxytormentic acid                                | 3.0932988  | - | - | - | 347.204  | 651.85059  |
| POS02477 | 85146.05852 | 60897.8578  | -0.48355 | 0.159242 | 0.4871 | 0.11864 | Epomusenin A                                                         | -11.341496 | - | - | - | 347.157  | 559.919038 |

|          |             |             |          |          |        |         |                                                                       |            |   |   |   |          |            |
|----------|-------------|-------------|----------|----------|--------|---------|-----------------------------------------------------------------------|------------|---|---|---|----------|------------|
| POS02482 | 914204.8388 | 762436.0173 | -0.2619  | 0.084174 | 0.3821 | 0.27041 | Erythromycin C                                                        | 11.813814  | - | - | - | 347.0255 | 720.915981 |
| POS02486 | 795031.8592 | 711560.2645 | -0.16003 | 0.13449  | 0.4553 | 0.19315 | 9,10-12,13-diepoxy-<br>octadecanoate                                  | -17.881158 | - | - | - | 346.8955 | 626.881085 |
| POS02488 | 577081.0386 | 464701.773  | -0.31247 | 0.216587 | 0.5382 | 0.19219 | Iopodic acid                                                          | 17.754112  | - | - | - | 346.893  | 598.975093 |
| POS02489 | 272303.2598 | 265798.3551 | -0.03488 | 0.813028 | 0.9151 | 0.00321 | Ginsenoside F1                                                        | -13.94068  | - | - | - | 346.893  | 639.87047  |
| POS02492 | 455961.9217 | 367314.2719 | -0.3119  | 0.384521 | 0.6575 | 0.17993 | DG(14:0/0/22:5n3)                                                     | -5.9134796 | - | - | - | 346.891  | 615.95564  |
| POS02502 | 31583.1249  | 39204.02044 | 0.311848 | 0.623485 | 0.8127 | 0.03318 | Aquifoliunine EI                                                      | -16.623215 | - | - | - | 346.8695 | 868.83795  |
| POS02504 | 212656.2715 | 206449.1835 | -0.04274 | 0.88997  | 0.9497 | 0.00348 | Kad 1229                                                              | 17.45308   | - | - | - | 346.868  | 669.894451 |
| POS02506 | 56777.8917  | 59642.12164 | 0.071002 | 0.778312 | 0.8983 | 0.01512 | O-(2-(3-methylbut-2-en-1-yl)phenyl) 5,7,8-trihydroxy-4-               | -22.70512  | - | - | - | 346.868  | 827.836503 |
| POS02508 | 314452.5372 | 395437.4413 | 0.330607 | 0.348214 | 0.6355 | 0.18914 | PE(14:1(9Z)/P-16:0)                                                   | 17.352066  | - | - | - | 346.8585 | 646.909184 |
| POS02511 | 201397.5668 | 261340.0984 | 0.375882 | 0.168785 | 0.4949 | 0.1732  | PS(14:0/14:0)                                                         | -12.391517 | - | - | - | 346.847  | 680.871852 |
| POS02518 | 219615.1907 | 296466.3117 | 0.43289  | 0.239594 | 0.5591 | 0.18149 | PS(14:1(9Z)/18:3(9Z,12Z,<br>15Z))                                     | -2.024124  | - | - | - | 346.572  | 728.910903 |
| POS02522 | 172627.5286 | 151189.5142 | -0.1913  | 0.366596 | 0.6461 | 0.06265 | Cer(d18:1/18:1(11Z))                                                  | -23.337217 | - | - | - | 346.558  | 564.932116 |
| POS02524 | 61472.39868 | 54008.96755 | -0.18674 | 0.675358 | 0.8398 | 0.031   | PS(14:0/15:0)                                                         | -5.3039293 | - | - | - | 346.558  | 694.903596 |
| POS02527 | 136437.7372 | 100137.0231 | -0.44627 | 0.070279 | 0.357  | 0.14186 | Bis(glutathionyl)spermine<br>disulfide                                | 14.703323  | - | - | - | 346.55   | 779.95953  |
| POS02534 | 81524.03822 | 82279.24335 | 0.013303 | 0.972631 | 0.9873 | 0.00325 | (2S,3S,4S)-trihydroxy-4-<br>[6,9,17,19,21-<br>pentahydroxy-5,13-bis(2 | 23.063812  | - | - | - | 346.4095 | 897.857961 |
| POS02538 | 231169.5522 | 209427.7935 | -0.1425  | 0.474857 | 0.7207 | 0.07376 | Dermorphin                                                            | -5.3649841 | - | - | - | 346.259  | 803.875569 |
| POS02544 | 3691407.644 | 2894925.281 | -0.35064 | 0.039288 | 0.2959 | 0.69226 | Antimony potassium<br>tartrate                                        | 17.213635  | - | - | - | 346.253  | 668.891373 |
| POS02546 | 80189.1048  | 90412.96274 | 0.173123 | 0.662334 | 0.8336 | 0.03245 | Prephytoene diphosphate                                               | 7.1743694  | - | - | - | 346.253  | 723.923663 |
| POS02550 | 162046.39   | 170521.5679 | 0.073547 | 0.758552 | 0.8874 | 0.02467 | (0R,1R,8S,11R,14S,15S,21R,22R)-<br>octahydroxy-3,16-dioxo-<br>2,17,20 | 21.039251  | - | - | - | 346.2525 | 563.429109 |
| POS02554 | 112966.037  | 122779.3385 | 0.120179 | 0.685692 | 0.8454 | 0.05326 | R.g.-Keto III                                                         | 16.453605  | - | - | - | 346.247  | 629.941025 |
| POS02557 | 116677.4274 | 99475.7443  | -0.23011 | 0.518134 | 0.7495 | 0.06352 | Mometasone furoate                                                    | -16.679149 | - | - | - | 346.2265 | 522.42808  |
| POS02564 | 557568.4472 | 576810.6028 | 0.048949 | 0.834507 | 0.9243 | 0.04843 | Hovenidulcioside B2                                                   | 13.241402  | - | - | - | 345.943  | 709.892463 |
| POS02567 | 222558.465  | 206117.488  | -0.11072 | 0.834769 | 0.9243 | 0.04428 | PA(14:0/22:4(7Z,10Z,13Z,<br>16Z))                                     | 5.8195199  | - | - | - | 345.938  | 697.958332 |

|          |             |             |          |          |        |         |                                                         |            |   |   |   |          |            |
|----------|-------------|-------------|----------|----------|--------|---------|---------------------------------------------------------|------------|---|---|---|----------|------------|
| POS02568 | 852810.1226 | 856469.3043 | 0.006177 | 0.969295 | 0.9861 | 0.00358 | Cethromycin                                             | -18.521501 | - | - | - | 345.938  | 766.92509  |
| POS02572 | 985378.9071 | 866724.47   | -0.18511 | 0.339229 | 0.6326 | 0.17857 | Donhexocin                                              | 13.798676  | - | - | - | 345.929  | 615.909461 |
| POS02573 | 3475302.471 | 3041585.524 | -0.19231 | 0.366862 | 0.6463 | 0.3846  | Erioglaucine A                                          | -7.9586023 | - | - | - | 345.927  | 750.894308 |
| POS02574 | 498510.997  | 437953.4869 | -0.18685 | 0.376215 | 0.6512 | 0.15187 | Nostocyclopeptide A2                                    | -22.323442 | - | - | - | 345.9265 | 791.894621 |
| POS02577 | 1008537.989 | 986499.707  | -0.03187 | 0.867226 | 0.9403 | 0.00243 | 20,21-Diprenylterpendole<br>C                           | -3.2310155 | - | - | - | 345.9165 | 656.910857 |
| POS02580 | 285043.1061 | 287114.6834 | 0.010447 | 0.972992 | 0.9873 | 0.00031 | CerP(d18:1/18:0)                                        | -8.6999518 | - | - | - | 345.776  | 646.935357 |
| POS02581 | 146058.1984 | 85846.23565 | -0.76672 | 0.068126 | 0.3534 | 0.18584 | Corchoroside E                                          | 21.085429  | - | - | - | 345.773  | 861.96093  |
| POS02582 | 2729379.117 | 2489977.216 | -0.13244 | 0.56424  | 0.7766 | 0.1859  | PE(18:4(6Z,9Z,12Z,15Z)/<br>P-16:0)                      | -2.3058091 | - | - | - | 345.772  | 696.955072 |
| POS02590 | 1318738.879 | 1221091.05  | -0.11099 | 0.615343 | 0.8087 | 0.13387 | Lasonolide A                                            | -7.5294263 | - | - | - | 345.6175 | 697.911729 |
| POS02599 | 1326755.741 | 951035.0771 | -0.48033 | 0.02975  | 0.2674 | 0.49135 | Homotrypanothione                                       | 23.418297  | - | - | - | 345.4515 | 738.913357 |
| POS02601 | 4330767.851 | 3380817.333 | -0.35725 | 0.138375 | 0.4613 | 0.64802 | Cephalomannine                                          | -13.72511  | - | - | - | 345.3075 | 832.896459 |
| POS02603 | 906854.1103 | 1026683.78  | 0.17905  | 0.378652 | 0.6529 | 0.21669 | Periandrin V                                            | -20.07075  | - | - | - | 345.306  | 779.914243 |
| POS02605 | 180019.4346 | 150406.1359 | -0.25929 | 0.285491 | 0.6008 | 0.10873 | Glycerol 1-(9Z-<br>octadecenoate) 2-<br>hexadecenoate 3 | 1.2122293  | - | - | - | 345.304  | 862.419021 |
| POS02606 | 2051363.744 | 1810309.919 | -0.18035 | 0.181706 | 0.5071 | 0.32788 | DG(15:0/20:4(5Z,8Z,11Z,<br>14Z)/0:0)                    | -10.233121 | - | - | - | 345.3025 | 603.928707 |
| POS02607 | 228232.6237 | 197845.706  | -0.20613 | 0.595021 | 0.7937 | 0.0549  | PS(14:0/18:4(6Z,9Z,12Z,1<br>5Z))                        | 20.91183   | - | - | - | 345.3005 | 728.939499 |
| POS02608 | 2424874.117 | 1998885.533 | -0.27871 | 0.294618 | 0.6086 | 0.40111 | PS(14:1(9Z)/22:6(4Z,7Z,1<br>0Z,13Z,16Z,19Z))            | -16.71958  | - | - | - | 345.3    | 778.958069 |
| POS02610 | 153866.6131 | 110947.9102 | -0.4718  | 0.124995 | 0.4435 | 0.1502  | DG(14:0/22:4(7Z,10Z,13Z<br>,16Z)/0:0)                   | -0.6590587 | - | - | - | 345.294  | 617.96107  |
| POS02611 | 150047.725  | 140989.0823 | -0.08984 | 0.759303 | 0.8876 | 0.02078 | PS(14:1(9Z)/20:5(5Z,8Z,1<br>1Z,14Z,17Z))                | -0.7392254 | - | - | - | 345.294  | 752.945721 |
| POS02612 | 2091273.739 | 1760212.667 | -0.24863 | 0.297483 | 0.6109 | 0.3595  | DG(9D3/9D3/0:0)                                         | -11.131413 | - | - | - | 345.2925 | 645.934098 |
| POS02618 | 2280748.164 | 1979534.371 | -0.20435 | 0.286022 | 0.6016 | 0.31872 | PA(15:0/20:3(5Z,8Z,11Z))                                | -18.000669 | - | - | - | 344.995  | 685.930947 |
| POS02632 | 108206.8614 | 97516.40878 | -0.15008 | 0.720782 | 0.8657 | 0.03724 | Gypsogenin 3-O-<br>rhamnosylglucuronide                 | -13.25297  | - | - | - | 344.683  | 793.945968 |
| POS02633 | 1831027.543 | 1612116.643 | -0.1837  | 0.385862 | 0.6583 | 0.23833 | PS(15:0/18:4(6Z,9Z,12Z,1<br>5Z))                        | 16.698032  | - | - | - | 344.6825 | 742.963666 |
| POS02634 | 14083695.51 | 14427584.69 | 0.034804 | 0.864334 | 0.9385 | 0.09748 | Galactosylceramide<br>(d18:1/12:0)                      | -18.487361 | - | - | - | 344.68   | 644.930372 |

|          |             |             |          |          |        |         |                                                                  |            |   |   |   |          |            |
|----------|-------------|-------------|----------|----------|--------|---------|------------------------------------------------------------------|------------|---|---|---|----------|------------|
| POS02640 | 2716267.022 | 2139230.897 | -0.34453 | 0.064975 | 0.3461 | 0.58184 | (3R,8a,22K)-3-Hydroxyspirostan-6-one 3-O-acetolactone (1)        | 18.955111  | - | - | - | 344.674  | 767.933714 |
| POS02641 | 482806.9691 | 394101.0464 | -0.29288 | 0.325366 | 0.6315 | 0.13944 | TG(10:0/16:0/a-25:0)[rac]                                        | 13.639271  | - | - | - | 344.673  | 850.438862 |
| POS02644 | 293311.4105 | 253544.9734 | -0.21019 | 0.220585 | 0.5419 | 0.12134 | PE(14:0/P-18:1(11Z))                                             | 3.3359743  | - | - | - | 344.668  | 674.953325 |
| POS02647 | 317025.0013 | 278497.7749 | -0.18693 | 0.486812 | 0.7289 | 0.09994 | Bis(glutathionyl)spermine                                        | 1.4714283  | - | - | - | 344.649  | 781.965026 |
| POS02649 | 150138.5657 | 101251.8883 | -0.56835 | 0.26597  | 0.5823 | 0.11755 | Leucokinin I                                                     | 12.679399  | - | - | - | 344.5155 | 892.944586 |
| POS02651 | 358658.9258 | 224035.4341 | -0.67889 | 0.074412 | 0.3656 | 0.26735 | PA(14:1(9Z)/22:2(13Z,16Z))                                       | -11.154454 | - | - | - | 344.5125 | 699.96248  |
| POS02652 | 4086431.851 | 3011260.694 | -0.44047 | 0.05629  | 0.3284 | 0.81063 | DG(14:0/0/20:3n6)                                                | 19.171971  | - | - | - | 344.507  | 591.948606 |
| POS02655 | 984550.124  | 928981.7306 | -0.08381 | 0.793966 | 0.9052 | 0.09141 | 2-[4-(1,2-dihydroxyethyl)-5,11,12,13-tetrahydroxy-8-oxo-3,7]     | 7.5417702  | - | - | - | 344.365  | 633.451046 |
| POS02656 | 2610637.658 | 1868244.474 | -0.48272 | 0.059056 | 0.336  | 0.66497 | Licoricesaponin B2                                               | -20.75054  | - | - | - | 344.365  | 809.93909  |
| POS02657 | 2491761.579 | 1938454.391 | -0.36226 | 0.242323 | 0.5616 | 0.48051 | 20-O-Methyl-19-chloroproansamitocin                              | -0.8534432 | - | - | - | 344.3645 | 493.011157 |
| POS02673 | 451879.6961 | 494174.4253 | 0.129082 | 0.461102 | 0.7119 | 0.1053  | PE(16:1(9Z)/16:1(9Z))                                            | 12.312375  | - | - | - | 344.04   | 688.955747 |
| POS02674 | 319568.8285 | 333943.813  | 0.063479 | 0.783392 | 0.9004 | 0.03603 | Digitin                                                          | 16.068409  | - | - | - | 344.038  | 797.957982 |
| POS02681 | 369696.1238 | 706692.339  | 0.934742 | 0.263059 | 0.58   | 0.41141 | Triforine                                                        | 19.042442  | - | - | - | 343.737  | 435.977359 |
| POS02685 | 730534.7566 | 580750.3699 | -0.33103 | 0.141351 | 0.4651 | 0.29256 | 2,3,4,5-Tetrachloro-4'-biphenylol                                | -13.538359 | - | - | - | 343.73   | 308.990507 |
| POS02692 | 331851.0992 | 330291.4594 | -0.0068  | 0.979454 | 0.9899 | 0.02348 | PS(14:0/20:4(5Z,8Z,11Z,14Z))                                     | -11.086346 | - | - | - | 343.429  | 756.957196 |
| POS02698 | 685557.9876 | 495038.5281 | -0.46974 | 0.400076 | 0.6679 | 0.23018 | Tetrabromobisphenol A                                            | 1.0991437  | - | - | - | 343.276  | 544.878474 |
| POS02707 | 783765.1941 | 536737.2287 | -0.54621 | 0.211653 | 0.5346 | 0.3127  | 3,4,5-trihydroxy-6-[(E)-2-(3-hydroxy-5-(1,2,4,5-tetrahydroxy-6   | -15.833061 | - | - | - | 343.1145 | 745.647486 |
| POS02710 | 1989471.038 | 3563426.934 | 0.84088  | 0.315066 | 0.6245 | 0.72107 | DG(11D3/9D3/0:0)                                                 | 2.6259802  | - | - | - | 343.113  | 673.997044 |
| POS02714 | 1951368.058 | 1744387.517 | -0.16177 | 0.466509 | 0.7151 | 0.24109 | (E)-1-(3-(10-hydroxy-3-(3-hydroxyphenyl)-2-(4-hydroxyphenyl)-2,3 | -8.054281  | - | - | - | 343.1035 | 891.941101 |
| POS02719 | 151161.85   | 210264.822  | 0.476113 | 0.070961 | 0.3583 | 0.1946  | PE(14:0/22:6(4Z,7Z,10Z,13Z,16Z,19Z))                             | -18.012967 | - | - | - | 342.9615 | 736.96422  |
| POS02727 | 335354.0795 | 2545871.79  | 2.924403 | 0.059508 | 0.3364 | 1.2137  | Chikusetsusaponin Ia                                             | 3.5513379  | - | - | - | 342.799  | 755.997258 |
| POS02731 | 998550.2399 | 818904.8687 | -0.28614 | 0.04707  | 0.314  | 0.29755 | TG(15:0/20:1(11Z)/22:6(4Z,7Z,10Z,13Z,16Z,19Z))                   | -17.853273 | - | - | - | 342.798  | 920.460861 |
| POS02745 | 8025227.074 | 8179404.337 | 0.027454 | 0.77286  | 0.8949 | 0.16609 | DG(18:4(0Z,9Z,12Z,15Z)/22:6(4Z,7Z,10Z,13Z,16Z,19Z)/0:0)          | -3.3699495 | - | - | - | 342.785  | 661.970349 |



|          |             |             |          |          |        |         |                                                                     |            |   |   |   |          |            |
|----------|-------------|-------------|----------|----------|--------|---------|---------------------------------------------------------------------|------------|---|---|---|----------|------------|
| POS02746 | 1322248.813 | 1185379.878 | -0.15764 | 0.455132 | 0.7083 | 0.18939 | Agathisflavone                                                      | 6.3244776  | - | - | - | 342.6465 | 539.468582 |
| POS02749 | 491055.8069 | 407031.8825 | -0.27075 | 0.155188 | 0.4838 | 0.21088 | Dimethylarsinous acid                                               | -21.864022 | - | - | - | 342.494  | 123.002609 |
| POS02750 | 528715.8869 | 715406.9577 | 0.436271 | 0.032838 | 0.2781 | 0.35719 | Cer(d18:0/18:0)                                                     | 23.342224  | - | - | - | 342.494  | 568.990234 |
| POS02754 | 1006486.145 | 1042112.523 | 0.050184 | 0.681356 | 0.8431 | 0.07634 | Fursultiamine hydrochloride                                         | -1.4029783 | - | - | - | 342.489  | 436.010966 |
| POS02757 | 8128093.057 | 8215431.854 | 0.015419 | 0.888399 | 0.949  | 0.10473 | Patellamide A                                                       | 19.408388  | - | - | - | 342.489  | 743.973196 |
| POS02761 | 995015.695  | 939511.3745 | -0.08281 | 0.496806 | 0.7349 | 0.10785 | Pseudoargiopinin I                                                  | 7.6490288  | - | - | - | 342.488  | 744.975767 |
| POS02766 | 2522283.282 | 2258545.196 | -0.15934 | 0.227905 | 0.5492 | 0.30938 | alpha-Amanitin                                                      | -18.168376 | - | - | - | 342.487  | 919.96028  |
| POS02771 | 13420630.25 | 12624235.33 | -0.08826 | 0.339727 | 0.6326 | 0.46377 | erythro-6,8-Hexatriacontanediol                                     | -16.194346 | - | - | - | 342.486  | 539.970148 |
| POS02774 | 2485248.886 | 2423764.507 | -0.03614 | 0.736227 | 0.8747 | 0.06054 | PC(14:0/16:1(9Z))                                                   | -0.7704536 | - | - | - | 342.4845 | 704.976534 |
| POS02777 | 657830.0852 | 592040.64   | -0.15202 | 0.4805   | 0.7238 | 0.12747 | Adenosylhopane                                                      | 8.4115179  | - | - | - | 342.483  | 662.972745 |
| POS02782 | 884636.3526 | 1046551.17  | 0.242486 | 0.133583 | 0.454  | 0.29946 | Spinosyn D                                                          | 10.970311  | - | - | - | 342.4815 | 746.99756  |
| POS02783 | 2320107.014 | 2280986.868 | -0.02453 | 0.826366 | 0.9204 | 0.03454 | Leucomycin A1                                                       | 19.787999  | - | - | - | 342.4815 | 786.981129 |
| POS02789 | 9855704.4   | 9489514.396 | -0.05462 | 0.584531 | 0.7883 | 0.23145 | Astragaloside III                                                   | 0.6681251  | - | - | - | 342.481  | 785.978001 |
| POS02790 | 432334.4077 | 701437.7272 | 0.698167 | 0.223286 | 0.545  | 0.285   | PGP(16:0/16:1(9Z))                                                  | 21.82054   | - | - | - | 342.481  | 801.969754 |
| POS02793 | 5656137.809 | 5911440.582 | 0.063692 | 0.62019  | 0.8112 | 0.26288 | Nodularin                                                           | 7.1325338  | - | - | - | 342.4795 | 825.975861 |
| POS02798 | 1466155.667 | 1492643.062 | 0.025831 | 0.860405 | 0.9366 | 0.05029 | Chlorophyll b                                                       | 0.6826003  | - | - | - | 342.479  | 908.480396 |
| POS02802 | 508840.1511 | 578310.9308 | 0.184633 | 0.35965  | 0.6425 | 0.16536 | Prenylated FMNH2                                                    | 7.5192134  | - | - | - | 342.4785 | 527.487935 |
| POS02806 | 376858.1652 | 550153.5106 | 0.545813 | 0.117527 | 0.432  | 0.31553 | 1G(20:4(2Z,8Z,11Z,14Z)/22:5(4Z,7Z,10Z,13Z,16Z)/20:4(2Z,8Z,11Z,14Z)) | 9.6074297  | - | - | - | 342.478  | 978.502568 |
| POS02811 | 410094.3056 | 597526.488  | 0.543047 | 0.123309 | 0.441  | 0.33919 | DG(14:0/0/20:1n9)                                                   | 4.8582977  | - | - | - | 342.476  | 595.972167 |
| POS02812 | 180769.9711 | 238265.9704 | 0.398418 | 0.2767   | 0.5932 | 0.14989 | PA(10:0/i-24:0)                                                     | 14.603773  | - | - | - | 342.476  | 677.974163 |
| POS02816 | 386983.6641 | 418303.818  | 0.112278 | 0.677236 | 0.8404 | 0.10126 | Oleoyl-CoA                                                          | 0.3572573  | - | - | - | 342.4755 | 1032.98785 |
| POS02817 | 2624333.466 | 2549203.897 | -0.0419  | 0.62934  | 0.8159 | 0.09841 | Azimilide                                                           | 17.52379   | - | - | - | 342.475  | 458.968402 |
| POS02819 | 53906157.27 | 52145426.32 | -0.04791 | 0.645003 | 0.8256 | 0.43382 | Beauvericin                                                         | 23.747449  | - | - | - | 342.474  | 784.974693 |

|          |             |             |          |          |        |         |                                                         |            |   |   |   |          |            |
|----------|-------------|-------------|----------|----------|--------|---------|---------------------------------------------------------|------------|---|---|---|----------|------------|
| POS02823 | 317906.1847 | 320622.2629 | 0.012274 | 0.940678 | 0.9732 | 0.01941 | rasin B                                                 | 7.2494635  | - | - | - | 342.472  | 764.022108 |
| POS02826 | 66352914.48 | 63522691.9  | -0.06289 | 0.515647 | 0.7477 | 0.68294 | PE-<br>NMe(14:0/18:2(9Z,12Z))                           | -3.2484713 | - | - | - | 342.4705 | 702.971996 |
| POS02827 | 3736834.596 | 3984504.619 | 0.092584 | 0.505125 | 0.7415 | 0.27049 | 1-hexahecanoil-2-(9Z,12Z)-<br>octadecenoyl)-sn-glycero- | 7.7561498  | - | - | - | 342.4705 | 763.019087 |
| POS02830 | 2940889.499 | 3404539.753 | 0.211207 | 0.220802 | 0.5419 | 0.47895 | 2-phosphatidyl-<br>Bayogenin 3-O-                       | 9.8995756  | - | - | - | 342.469  | 813.995625 |
| POS02835 | 826584.2886 | 592092.5393 | -0.48134 | 0.063638 | 0.3438 | 0.35781 | cellobioside<br>Clocapramine                            | -7.0784763 | - | - | - | 342.3325 | 554.997855 |
| POS02843 | 29581818.29 | 30662496.61 | 0.051764 | 0.671478 | 0.8378 | 0.49484 | dihydrochloride<br>CE(14:0)                             | -8.0188991 | - | - | - | 342.3275 | 598.011689 |
| POS02847 | 71886892.76 | 75344694.13 | 0.067777 | 0.618011 | 0.8101 | 0.89826 | PE-<br>NMe2(18:4(6Z,9Z,12Z,15                           | 0.4096078  | - | - | - | 342.3275 | 761.013588 |
| POS02849 | 7968055.635 | 8081595.624 | 0.020412 | 0.857002 | 0.9351 | 0.12196 | 7,18,16,17,12,15Z))<br>Pristimycin IA                   | 17.614088  | - | - | - | 342.3275 | 867.980447 |
| POS02853 | 10348549.65 | 10460793.93 | 0.015564 | 0.897217 | 0.9529 | 0.10648 | Linoleoyl-CoA                                           | 11.50075   | - | - | - | 342.3275 | 1030.98342 |
| POS02858 | 236911.6694 | 372036.3179 | 0.651094 | 0.049728 | 0.3188 | 0.30396 | PA(10:0/a-25:0)                                         | 5.0462298  | - | - | - | 342.3225 | 691.994763 |
| POS02862 | 826915.9106 | 1051704.626 | 0.346917 | 0.145412 | 0.4697 | 0.33724 | TG(16:0/22:5(4Z,7Z,10Z,1                                | 0.3241783  | - | - | - | 342.186  | 896.499567 |
| POS02866 | 4502648.323 | 5098041.508 | 0.179169 | 0.171403 | 0.4973 | 0.55009 | 3Z,16Z)/o-18:0)<br>PC(14:0/P-16:0)                      | -3.346071  | - | - | - | 342.184  | 690.991268 |
| POS02876 | 1727718.422 | 1826176.256 | 0.079958 | 0.614869 | 0.8087 | 0.14691 | CDP-DG(a-13:0/a-17:0)                                   | -16.564797 | - | - | - | 342.181  | 927.023937 |
| POS02877 | 1069029.549 | 1335353.665 | 0.32092  | 0.177381 | 0.5035 | 0.36642 | Crocin                                                  | 21.366988  | - | - | - | 342.179  | 978.000152 |
| POS02890 | 72391564.08 | 67929528.93 | -0.09178 | 0.338556 | 0.6326 | 1.13702 | 4-Bromo-3,5-<br>cyclohexadiene-1,2-dione                | 0.973743   | - | - | - | 342.176  | 187.998259 |
| POS02892 | 962779.5178 | 1279325.493 | 0.410106 | 0.133046 | 0.4533 | 0.42501 | Ginsenoside Rf                                          | -6.6632423 | - | - | - | 342.176  | 802.014639 |
| POS02894 | 537322.8183 | 726221.2634 | 0.43462  | 0.052669 | 0.3231 | 0.35251 | Leucomycin A3                                           | -1.9486262 | - | - | - | 342.176  | 829.000663 |
| POS02895 | 223002.5701 | 230459.7776 | 0.047455 | 0.891959 | 0.9504 | 0.02715 | Cyclopassifloside III                                   | -6.8616862 | - | - | - | 342.176  | 846.023678 |
| POS02898 | 410583.9449 | 382002.0423 | -0.1041  | 0.648344 | 0.8276 | 0.05209 | trans-2-Enoyl-OPC8-CoA                                  | 22.409291  | - | - | - | 342.176  | 1042.96263 |
| POS02907 | 12052405.97 | 11495652.01 | -0.06823 | 0.459482 | 0.7113 | 0.34403 | Dimethyl diselenide                                     | 9.572858   | - | - | - | 342.175  | 188.999076 |
| POS02909 | 219149.5107 | 235714.4029 | 0.105124 | 0.679272 | 0.8418 | 0.05565 | (3-{4-[(E)-2-{3-[3-(3,5-<br>dihydroxyphenyl)-6-         | 15.895376  | - | - | - | 342.175  | 938.00217  |
| POS02910 | 5043894.798 | 4531088.751 | -0.15468 | 0.11469  | 0.4286 | 0.49473 | hydroxy-2-(1-<br>Galactosylceramide                     | -2.0380767 | - | - | - | 342.174  | 672.994007 |
| POS02912 | 258441.7014 | 516482.4752 | 0.998881 | 0.005654 | 0.1571 | 0.46029 | (d18:1/14:0)<br>TG(22:0(4Z,7Z,10Z,13Z,1                 | -4.6949722 | - | - | - | 342.173  | 966.521044 |
|          |             |             |          |          |        |         | 6Z,19Z)/o-<br>18:0/22:6(17,7,10,13,7                    |            |   |   |   |          |            |

|          |             |             |          |          |        |         |                                                      |            |   |   |   |          |            |
|----------|-------------|-------------|----------|----------|--------|---------|------------------------------------------------------|------------|---|---|---|----------|------------|
| POS02915 | 221421.8403 | 190585.666  | -0.21636 | 0.43729  | 0.6948 | 0.0777  | DG(15:0/0:20:1n9)                                    | -8.5341552 | - | - | - | 342.171  | 609.991079 |
| POS02918 | 287839.3975 | 380953.4836 | 0.404351 | 0.24367  | 0.5621 | 0.21151 | Alamandine                                           | -4.327718  | - | - | - | 342.1665 | 855.998876 |
| POS02945 | 476489.6852 | 402972.8169 | -0.24176 | 0.041288 | 0.2991 | 0.21908 | Armillaramide                                        | -22.220362 | - | - | - | 338.064  | 556.910924 |
| POS02946 | 900799.5628 | 787320.3003 | -0.19426 | 0.062338 | 0.3417 | 0.25717 | Cryptocyanin                                         | 14.416657  | - | - | - | 338.054  | 481.398102 |
| POS02955 | 190934.5697 | 234119.8966 | 0.294169 | 0.666346 | 0.8359 | 0.06894 | 3-(3,5-Diiodo-4-hydroxyphenyl)lactate                | -9.0911297 | - | - | - | 337.717  | 434.969731 |
| POS02958 | 184493.9658 | 150732.6563 | -0.29158 | 0.022731 | 0.2473 | 0.15293 | Pavoninin 1                                          | 2.3118453  | - | - | - | 337.707  | 662.874507 |
| POS02964 | 1454118.584 | 1107154.498 | -0.39329 | 0.097244 | 0.4032 | 0.44489 | Radon-222                                            | 2.397794   | - | - | - | 337.416  | 223.007809 |
| POS02983 | 84467.85981 | 80998.65172 | -0.0605  | 0.687412 | 0.8457 | 0.02467 | Lolicine A                                           | -9.5606654 | - | - | - | 337.0215 | 604.832604 |
| POS02987 | 72644.87622 | 66798.23139 | -0.12105 | 0.474556 | 0.7207 | 0.03102 | 5D-Hydroxy-OD-(5-chloro-2-hydroxy-2-methylbutanoate) | -10.650866 | - | - | - | 337.008  | 401.897007 |
| POS02999 | 272546.7028 | 184556.6821 | -0.56244 | 0.095014 | 0.3988 | 0.22272 | Arsenobetaine                                        | -20.101259 | - | - | - | 336.698  | 179.064897 |
| POS03010 | 184528.1508 | 165883.6558 | -0.15367 | 0.246103 | 0.564  | 0.07954 | Triphosphate                                         | 1.3440786  | - | - | - | 336.305  | 253.922917 |
| POS03016 | 247931.6568 | 209627.1767 | -0.24212 | 0.034128 | 0.2814 | 0.1593  | Lamotrigine                                          | 2.2041355  | - | - | - | 335.691  | 257.098841 |
| POS03020 | 133939.4772 | 108058.4052 | -0.30977 | 0.261497 | 0.5789 | 0.10565 | O-phosphonato-L-homoserine(2-)                       | -13.548038 | - | - | - | 334.929  | 198.088606 |
| POS03026 | 86272.46201 | 91023.12962 | 0.077333 | 0.704704 | 0.8557 | 0.02156 | 5a,11a-Dehydrochlortetracycline                      | 24.17035   | - | - | - | 334.201  | 477.882503 |
| POS03034 | 98109.3424  | 113135.9931 | 0.205596 | 0.340378 | 0.6326 | 0.06693 | Clobetasol                                           | -8.0089104 | - | - | - | 333.6915 | 411.910986 |
| POS03035 | 102868.3188 | 71490.62136 | -0.52497 | 0.01589  | 0.2226 | 0.14482 | Pepsinostreptin                                      | 22.5561    | - | - | - | 333.553  | 672.887931 |
| POS03038 | 283949.3462 | 264692.4783 | -0.10132 | 0.49606  | 0.7344 | 0.05481 | Melleolide M                                         | -23.732939 | - | - | - | 333.451  | 453.921527 |
| POS03043 | 175905.4692 | 125238.9358 | -0.49012 | 0.007602 | 0.1804 | 0.20093 | PE(14:0/P-16:0)                                      | 20.856053  | - | - | - | 333.125  | 648.927389 |
| POS03076 | 616045.3321 | 456368.4561 | -0.43284 | 0.114899 | 0.4289 | 0.25275 | N-(2R-Hydroxyhexadecanoyl)-2S-aminopropanoic acid    | 12.563681  | - | - | - | 332.0395 | 566.925187 |
| POS03080 | 769784.5711 | 576018.0396 | -0.41834 | 0.042825 | 0.3045 | 0.3607  | 2,4-Dinitroaniline                                   | 22.611606  | - | - | - | 331.8805 | 184.133017 |
| POS03084 | 845199.0081 | 688755.8845 | -0.2953  | 0.055913 | 0.3276 | 0.2967  | Oxalosuccite                                         | 14.383357  | - | - | - | 331.4005 | 191.117611 |
| POS03085 | 1552733.582 | 1241507.874 | -0.32272 | 0.078135 | 0.3724 | 0.42773 | Dimefox                                              | -8.949497  | - | - | - | 331.3285 | 155.128897 |
| POS03089 | 1047714.505 | 974101.1118 | -0.1051  | 0.462438 | 0.7128 | 0.14151 | Calcium oxalate                                      | -17.639119 | - | - | - | 331.127  | 129.102017 |

|          |             |             |          |          |        |         |                                          |            |   |   |   |          |            |
|----------|-------------|-------------|----------|----------|--------|---------|------------------------------------------|------------|---|---|---|----------|------------|
| POS03092 | 275400.6078 | 62886.9524  | -2.1307  | 0.284249 | 0.6004 | 0.27035 | Se-Methyl-L-selenocysteine               | -16.099762 | - | - | - | 330.978  | 183.084145 |
| POS03094 | 94723.37904 | 97832.98749 | 0.0466   | 0.85986  | 0.9363 | 0.01866 | Ioxynil                                  | -6.1383387 | - | - | - | 330.9055 | 371.9188   |
| POS03098 | 1025019.805 | 680086.4216 | -0.59186 | 0.066281 | 0.3498 | 0.43697 | Didecyldimethylammonium chloride         | 9.6083213  | - | - | - | 330.667  | 363.086956 |
| POS03102 | 3810370.393 | 2083245.134 | -0.8711  | 0.029575 | 0.2674 | 1.10191 | Calcium formate                          | -18.568118 | - | - | - | 330.228  | 131.117761 |
| POS03106 | 1401085.465 | 1661726.234 | 0.246138 | 0.512516 | 0.7457 | 0.22148 | N-(2,5-Dihydroxybenzoyl)-L-serine        | 6.5023157  | - | - | - | 329.904  | 242.206245 |
| POS03109 | 203429.7607 | 191327.722  | -0.08848 | 0.776603 | 0.8973 | 0.03681 | 2-Ketospirilloxanthin                    | -9.4567634 | - | - | - | 329.268  | 611.909599 |
| POS03111 | 2624293.987 | 3109094.409 | 0.244565 | 0.38646  | 0.6583 | 0.40686 | Threote                                  | -24.056674 | - | - | - | 329.034  | 137.107302 |
| POS03114 | 6097861.313 | 7065662.953 | 0.212522 | 0.677722 | 0.8406 | 0.34326 | Pyrazinoic acid                          | 19.563573  | - | - | - | 328.92   | 125.107204 |
| POS03147 | 3757438.392 | 4179881.738 | 0.153713 | 0.668547 | 0.8369 | 0.2016  | 2,5-Dichloro-2,5-cyclohexadiene-1,4-diol | 9.5827468  | - | - | - | 327.098  | 182.025611 |
| POS03153 | 1104490.568 | 901161.3671 | -0.29352 | 0.284379 | 0.6004 | 0.25289 | Stipitatote                              | -18.097579 | - | - | - | 327.038  | 209.12801  |
| POS03157 | 4380982.167 | 1900339.087 | -1.205   | 0.048668 | 0.316  | 1.33109 | Urate radical                            | 19.988758  | - | - | - | 326.9425 | 168.112917 |
| POS03158 | 1018913.256 | 794173.4376 | -0.35951 | 0.352042 | 0.6364 | 0.25223 | Normitrogen mustard                      | 8.6498788  | - | - | - | 326.9175 | 143.035505 |
| POS03159 | 195520.2906 | 137406.4572 | -0.50887 | 0.113796 | 0.427  | 0.17599 | 3',4'-Dihydrorhodovibrin                 | 17.363623  | - | - | - | 326.88   | 587.947268 |
| POS03167 | 1190124.753 | 1008317.462 | -0.23916 | 0.020872 | 0.2404 | 0.35421 | Citrate                                  | 12.853629  | - | - | - | 326.71   | 193.133246 |
| POS03169 | 3674482.846 | 3576219.449 | -0.03911 | 0.862151 | 0.9376 | 0.09888 | Bronopol                                 | 5.4362173  | - | - | - | 326.693  | 200.996364 |
| POS03182 | 66482492.49 | 56190402.83 | -0.24265 | 0.053229 | 0.3235 | 2.46836 | Bromobenzene                             | -18.355741 | - | - | - | 326.365  | 158.012295 |
| POS03188 | 809184.4812 | 765040.7226 | -0.08093 | 0.820833 | 0.9179 | 0.0927  | 3-Methyleneoxindole                      | -1.5709696 | - | - | - | 326.2675 | 146.165049 |
| POS03199 | 4976223.983 | 6647941.096 | 0.417856 | 0.108102 | 0.4178 | 0.96862 | Dinitrosopentamethylenetetramine         | 5.2958647  | - | - | - | 325.9715 | 187.180163 |
| POS03200 | 1701417.393 | 2481182.104 | 0.544291 | 0.101978 | 0.4083 | 0.67594 | Violacene                                | -1.4103767 | - | - | - | 325.967  | 355.932976 |
| POS03202 | 2102831.153 | 2507360.258 | 0.253836 | 0.280618 | 0.5965 | 0.38899 | 3-Bromo-2Z-heptenoic acid                | 11.488579  | - | - | - | 325.827  | 208.074655 |
| POS03210 | 141373.1997 | 118576.4768 | -0.25369 | 0.046626 | 0.3138 | 0.11723 | Apraclonidine                            | -17.62609  | - | - | - | 325.6235 | 246.111456 |
| POS03219 | 15492817.46 | 10858114.36 | -0.51283 | 0.259614 | 0.5782 | 1.26444 | Cyazine                                  | 19.802494  | - | - | - | 324.929  | 241.704743 |
| POS03222 | 13097967.79 | 8232708.833 | -0.6699  | 0.014407 | 0.2182 | 1.86686 | Trifluoromethyl-bismethyl ketone         | 16.435521  | - | - | - | 324.4415 | 141.113279 |

|          |             |             |          |          |        |         |                                                               |            |   |   |   |          |            |
|----------|-------------|-------------|----------|----------|--------|---------|---------------------------------------------------------------|------------|---|---|---|----------|------------|
| POS03223 | 12725051.46 | 11170323.54 | -0.188   | 0.147725 | 0.4733 | 0.83246 | Cyanidin                                                      | 3.2044634  | - | - | - | 324.4045 | 288.252397 |
| POS03230 | 713865.4894 | 626271.3539 | -0.18886 | 0.26327  | 0.58   | 0.20228 | Arsenobetaine                                                 | -19.641274 | - | - | - | 323.5175 | 179.064979 |
| POS03257 | 325148.3992 | 279500.7568 | -0.21825 | 0.06589  | 0.3485 | 0.1499  | Semicarbazide                                                 | -21.368121 | - | - | - | 320.003  | 76.0755725 |
| POS03264 | 878393.2822 | 808098.4543 | -0.12034 | 0.220981 | 0.542  | 0.15875 | 1,7-diphospho-1-epi-valienol                                  | 20.774057  | - | - | - | 317.635  | 337.141259 |
| POS03266 | 683703.0885 | 1035314.701 | 0.598628 | 0.429169 | 0.6879 | 0.3245  | Ammelide                                                      | -4.3613903 | - | - | - | 317.534  | 129.096218 |
| POS03284 | 687838.9955 | 613768.6396 | -0.16438 | 0.55283  | 0.7707 | 0.11352 | Salvarsan                                                     | -16.6448   | - | - | - | 315.584  | 440.00097  |
| POS03310 | 1150177.863 | 1175581.586 | 0.031518 | 0.923808 | 0.9656 | 0.00255 | 5-Nitrofurfural                                               | -19.902428 | - | - | - | 309.531  | 142.086069 |
| POS03315 | 8159010.352 | 5643986.411 | -0.53168 | 0.046495 | 0.3136 | 1.32923 | Nitrosylsulfuric acid                                         | -20.244735 | - | - | - | 307.08   | 128.081704 |
| POS03324 | 72395.11792 | 64785.92141 | -0.16021 | 0.435141 | 0.6932 | 0.05254 | CerP(d18:1/16:0)                                              | 5.6901816  | - | - | - | 306.056  | 618.891392 |
| POS03326 | 174594.4816 | 137781.4105 | -0.34163 | 0.196296 | 0.5222 | 0.13772 | N-[(4E,8E)-1,5-dihydroxyoctadeca-4,8-dien-2-yl]hexadecanamide | -4.7491367 | - | - | - | 306.051  | 536.889532 |
| POS03330 | 131898.8599 | 135619.3256 | 0.040131 | 0.892912 | 0.9507 | 0.02022 | Polixetonium chloride                                         | 14.094884  | - | - | - | 305.7085 | 326.20786  |
| POS03339 | 902925.0005 | 849420.6606 | -0.08813 | 0.485888 | 0.7284 | 0.1012  | Butefine hydrochloride                                        | 13.250077  | - | - | - | 305.371  | 354.940066 |
| POS03343 | 272944.6246 | 367316.8938 | 0.428417 | 0.204825 | 0.5284 | 0.20974 | Normitrogen mustard                                           | 8.4648092  | - | - | - | 303.619  | 143.035479 |
| POS03346 | 3521504.535 | 3237013.764 | -0.12153 | 0.819825 | 0.9178 | 0.0692  | Dimefox                                                       | -8.9085411 | - | - | - | 302.594  | 155.128904 |
| POS03396 | 583254.9844 | 599445.5324 | 0.039502 | 0.815805 | 0.9163 | 0.03631 | L-3,4-Dihydroxybutan-2-one 4-phosphate                        | 0.7120407  | - | - | - | 297.75   | 185.091808 |
| POS03403 | 1049310.958 | 920642.5527 | -0.18873 | 0.645337 | 0.826  | 0.17612 | Didecyldimethylammonium chloride                              | 8.0116921  | - | - | - | 296.2935 | 363.086377 |
| POS03426 | 1534886.99  | 1775754.578 | 0.2103   | 0.51734  | 0.7487 | 0.2168  | 3-Bromo-2Z-heptenoic acid                                     | 11.209594  | - | - | - | 285.525  | 208.074598 |
| POS03447 | 6649581.664 | 6246168.279 | -0.09029 | 0.883433 | 0.9474 | 0.03036 | Salvarsan                                                     | -16.69651  | - | - | - | 280.61   | 440.000947 |
| POS03457 | 10334748.59 | 4745678.424 | -1.12282 | 0.089861 | 0.3895 | 1.82199 | 2,5-Dichloro-2,5-cyclohexadiene-1,4-diol                      | 9.0703901  | - | - | - | 279.941  | 182.025518 |
| POS03470 | 3218864.029 | 2176943.671 | -0.56425 | 0.068151 | 0.3534 | 0.73495 | 3,3',5,5'-Tetrachloro-4,4'-biphenyldiol                       | -24.353045 | - | - | - | 279.3295 | 324.986187 |
| POS03472 | 10580786.84 | 8451163.006 | -0.32423 | 0.547348 | 0.7675 | 0.71304 | Bronopol                                                      | 5.1538412  | - | - | - | 279.215  | 200.996307 |
| POS03480 | 481523.2125 | 344453.1335 | -0.4833  | 0.097737 | 0.4036 | 0.28666 | Trichlormethine                                               | -24.932775 | - | - | - | 278.948  | 241.987368 |
| POS03481 | 109120.0306 | 185965.4701 | 0.769119 | 0.301812 | 0.6146 | 0.16566 | Diazenedicarboxamide                                          | -9.1637498 | - | - | - | 278.921  | 117.085013 |

|          |             |             |          |          |        |         |                                    |            |   |   |   |          |            |
|----------|-------------|-------------|----------|----------|--------|---------|------------------------------------|------------|---|---|---|----------|------------|
| POS03491 | 868737.3569 | 1021712.19  | 0.233997 | 0.488893 | 0.7301 | 0.21602 | Costatone                          | 24.490143  | - | - | - | 278.573  | 395.932048 |
| POS03496 | 230296.6569 | 219148.0323 | -0.07159 | 0.911446 | 0.9581 | 0.00636 | erythro-3-Hydroxy-Ls-aspartate     | 19.471665  | - | - | - | 278.5375 | 150.11228  |
| POS03507 | 439310.7656 | 302204.348  | -0.53972 | 0.007222 | 0.1779 | 0.3426  | Homotrypanothione                  | 21.079664  | - | - | - | 278.2145 | 738.911631 |
| POS03522 | 988835.986  | 844789.5487 | -0.22714 | 0.134182 | 0.4547 | 0.26004 | Helianyl octanoate                 | -20.628872 | - | - | - | 277.8995 | 555.925229 |
| POS03531 | 1546038.31  | 962351.7197 | -0.68394 | 0.088518 | 0.3878 | 0.60424 | Triphosphate                       | -9.0097207 | - | - | - | 277.716  | 258.959952 |
| POS03535 | 7722436.437 | 4537271.618 | -0.76723 | 0.346509 | 0.6348 | 0.98763 | Isometamidium chloride             | -17.65161  | - | - | - | 277.6635 | 497.004421 |
| POS03540 | 768832.7179 | 738207.191  | -0.05864 | 0.892709 | 0.9507 | 0.0319  | Normitrogen mustard                | 8.1182372  | - | - | - | 277.541  | 143.03543  |
| POS03545 | 3102432.816 | 1801626.705 | -0.7841  | 0.058721 | 0.3352 | 0.89154 | 3,5-Diiodo-4-hydroxyphenylpyruvate | 10.977291  | - | - | - | 277.416  | 432.962518 |
| POS03547 | 1441871.245 | 1204900.342 | -0.25903 | 0.407161 | 0.6725 | 0.23729 | Pepsinostreptin                    | 21.915253  | - | - | - | 277.376  | 672.887501 |
| POS03550 | 163177720.6 | 55161160.62 | -1.56472 | 0.019167 | 0.234  | 8.20889 | Bromobenzene                       | -18.73238  | - | - | - | 277.373  | 158.012235 |
| POS03561 | 493324.5117 | 423772.8953 | -0.21925 | 0.453282 | 0.707  | 0.12792 | Quicrine                           | 19.3613    | - | - | - | 277.152  | 400.97182  |
| POS03564 | 682534.3846 | 628499.104  | -0.11899 | 0.347533 | 0.6351 | 0.12804 | 9-Hydroxytridecyl docosanoate      | 22.66906   | - | - | - | 277.1295 | 539.947994 |
| POS03572 | 690621.0527 | 509895.6956 | -0.43769 | 0.277552 | 0.5936 | 0.25795 | 20,21-Diprenylterpendole C         | -6.0670527 | - | - | - | 276.943  | 656.908997 |
| POS03602 | 342265.4242 | 361344.6184 | 0.07826  | 0.805545 | 0.9113 | 0.07001 | Protochlorophyllide                | 3.2088833  | - | - | - | 276.387  | 613.966644 |
| POS03605 | 4328876.736 | 3970450.156 | -0.12469 | 0.764153 | 0.8906 | 0.21798 | Cyazine                            | 19.572925  | - | - | - | 276.3145 | 241.704688 |
| POS03606 | 3962069.999 | 2622708.621 | -0.5952  | 0.223748 | 0.5455 | 0.73456 | 3-Iodo-4-hydroxyphenylpyruvate     | 0.2869359  | - | - | - | 276.307  | 307.061364 |
| POS03620 | 144632.6286 | 151331.6081 | 0.06532  | 0.888502 | 0.949  | 0.03223 | PS(14:0/18:3(9Z,12Z,15Z))          | 0.0345878  | - | - | - | 275.2975 | 730.928302 |
| POS03624 | 34968.37567 | 24837.55738 | -0.49353 | 0.228388 | 0.5498 | 0.0575  | 3-(Uracil-1-yl)-L-alanine          | 19.995216  | - | - | - | 274.6035 | 200.175359 |
| POS03631 | 1326373.043 | 1282442.405 | -0.04859 | 0.889057 | 0.9493 | 0.00687 | Butefine hydrochloride             | 13.257043  | - | - | - | 272.098  | 354.940069 |
| POS03647 | 902787.3567 | 722547.295  | -0.32129 | 0.251902 | 0.5702 | 0.26833 | 4-Bromophenylacetate               | 11.532733  | - | - | - | 266.0665 | 216.053757 |
| POS03656 | 48988.68147 | 47375.57404 | -0.04831 | 0.803526 | 0.9104 | 0.0086  | 3-Bromosulfolane                   | 14.612512  | - | - | - | 266.009  | 200.076185 |
| POS03663 | 31476873.29 | 23294122.38 | -0.43433 | 0.190277 | 0.5172 | 1.78116 | Cuprous oxide                      | 21.025449  | - | - | - | 265.7525 | 144.101685 |
| POS03671 | 2041042.636 | 1672942.047 | -0.28692 | 0.47518  | 0.721  | 0.29382 | 3-Bromo-2Z-heptenoic acid          | 11.11712   | - | - | - | 265.5235 | 208.074579 |

|          |             |             |          |          |        |         |                                          |            |   |   |   |          |            |
|----------|-------------|-------------|----------|----------|--------|---------|------------------------------------------|------------|---|---|---|----------|------------|
| POS03676 | 12540680.03 | 3369845.23  | -1.89586 | 0.295515 | 0.6092 | 2.11094 | 2,5-Dichloro-2,5-cyclohexadiene-1,4-diol | 9.0054989  | - | - | - | 265.372  | 182.025507 |
| POS03688 | 2682662.664 | 2597811.962 | -0.04637 | 0.879584 | 0.9466 | 0.06624 | Salvarsan                                | -16.73689  | - | - | - | 264.767  | 440.000929 |
| POS03690 | 67928.99055 | 58263.83918 | -0.22143 | 0.665598 | 0.8354 | 0.02951 | 2-Oxoglutaramate                         | -22.80959  | - | - | - | 264.7515 | 146.117367 |
| POS03705 | 333641.8856 | 356935.0927 | 0.097361 | 0.698181 | 0.8513 | 0.05577 | 4-Hydroxybutanoic acid                   | -15.402936 | - | - | - | 261.7585 | 105.110173 |
| POS03706 | 8092941.622 | 8000396.476 | -0.01659 | 0.935558 | 0.9711 | 0.05497 | 3-hydroxy-2-isobutyrate                  | 14.450066  | - | - | - | 261.695  | 104.106766 |
| POS03707 | 554046.4445 | 492910.5048 | -0.16868 | 0.178949 | 0.5052 | 0.15254 | Aldehyde-L-iduronate                     | -6.6775713 | - | - | - | 261.572  | 194.137987 |
| POS03719 | 342566.2634 | 241647.1977 | -0.50348 | 0.009773 | 0.194  | 0.28245 | 2,4-Dichlorophenol                       | -11.937161 | - | - | - | 258.3885 | 164.006731 |
| POS03730 | 663677.4339 | 626890.3075 | -0.08227 | 0.710866 | 0.8589 | 0.07664 | 4-Nitrocatechol                          | -15.873237 | - | - | - | 257.944  | 156.113015 |
| POS03749 | 234780.8008 | 374483.7051 | 0.673589 | 0.1728   | 0.4988 | 0.21959 | 4-Oxoproline                             | 9.336823   | - | - | - | 256.6875 | 130.122482 |
| POS03754 | 171065.4172 | 128794.0271 | -0.40948 | 0.040173 | 0.2969 | 0.16184 | Didecyltrimethylammonium chloride        | 8.1855776  | - | - | - | 256.17   | 363.08644  |
| POS03758 | 835824.0759 | 1022236.922 | 0.290458 | 0.494553 | 0.7339 | 0.19794 | Nitrosylsulfuric acid                    | -20.311341 | - | - | - | 255.998  | 128.081695 |
| POS03763 | 453274.2695 | 372344.849  | -0.28374 | 0.040892 | 0.2988 | 0.23093 | Flucytosine                              | -18.191013 | - | - | - | 255.3015 | 130.097428 |
| POS03773 | 511881.2019 | 460854.8769 | -0.1515  | 0.475125 | 0.721  | 0.11872 | Aminomalate                              | -23.329368 | - | - | - | 252.885  | 120.080599 |
| POS03782 | 905680.011  | 447569.4534 | -1.01689 | 0.08359  | 0.3803 | 0.50493 | 3,5-Diiodo-4-hydroxyphenylpyruvate       | 10.807858  | - | - | - | 251.795  | 432.962445 |
| POS03786 | 3955004.006 | 2130330.616 | -0.8926  | 0.091343 | 0.3917 | 1.07855 | Isometamidium chloride                   | -17.750377 | - | - | - | 251.613  | 497.004372 |
| POS03802 | 15467556.21 | 5948279.842 | -1.3787  | 0.198286 | 0.524  | 1.92888 | Cyazine                                  | 19.695158  | - | - | - | 250.541  | 241.704717 |
| POS03804 | 845202.6075 | 665953.3238 | -0.34388 | 0.133115 | 0.4534 | 0.31852 | Butefine hydrochloride                   | 13.118155  | - | - | - | 250.2525 | 354.940019 |
| POS03812 | 52569562.2  | 40626163.31 | -0.37182 | 0.163014 | 0.4904 | 2.41613 | Bromobenzene                             | -18.686155 | - | - | - | 248.329  | 158.012243 |
| POS03840 | 1984570.756 | 1580412.755 | -0.32853 | 0.191359 | 0.5181 | 0.41002 | Calcium oxalate                          | -17.710631 | - | - | - | 245.6625 | 129.102008 |
| POS03844 | 2206806.672 | 1461598.535 | -0.59441 | 0.243695 | 0.5621 | 0.53713 | 3-Iodo-4-hydroxyphenylpyruvate           | 0.2572816  | - | - | - | 245.397  | 307.061355 |
| POS03876 | 4171382.895 | 3240896.388 | -0.36413 | 0.507014 | 0.7431 | 0.45565 | Salvarsan                                | -16.748248 | - | - | - | 244.666  | 440.000924 |
| POS03883 | 1873435.573 | 2749419.174 | 0.553441 | 0.407004 | 0.6725 | 0.50816 | 3-Bromo-2Z-heptenoic acid                | 11.186783  | - | - | - | 244.335  | 208.074593 |
| POS03893 | 7509564.832 | 6825135.829 | -0.13787 | 0.839728 | 0.9271 | 0.33011 | cis-4-Carboxymethylenebut-2-en-1-olide   | 7.1568406  | - | - | - | 244.003  | 141.101879 |

|          |             |             |          |          |        |         |                                          |            |   |   |   |          |            |
|----------|-------------|-------------|----------|----------|--------|---------|------------------------------------------|------------|---|---|---|----------|------------|
| POS03902 | 4190385.03  | 6882105.679 | 0.715767 | 0.125824 | 0.4446 | 1.09668 | 2,5-Dichloro-2,5-cyclohexadiene-1,4-diol | 9.1125916  | - | - | - | 243.962  | 182.025526 |
| POS03909 | 787872.0162 | 1060540.403 | 0.428766 | 0.293081 | 0.6078 | 0.2958  | Nornitrogen mustard                      | 8.1641219  | - | - | - | 243.665  | 143.035436 |
| POS03915 | 2889792.004 | 5274925.478 | 0.868185 | 0.184936 | 0.5109 | 1.11243 | Bronopol                                 | 5.1262394  | - | - | - | 243.506  | 200.996302 |
| POS03926 | 55191.94809 | 49776.32822 | -0.149   | 0.473205 | 0.7201 | 0.03578 | Pyruvate oxime                           | -23.219453 | - | - | - | 241.638  | 104.081583 |
| POS03955 | 1026093.044 | 859025.8807 | -0.25639 | 0.166975 | 0.4933 | 0.29627 | 4-Nitrocatechol                          | -15.810901 | - | - | - | 231.651  | 156.113024 |
| POS03956 | 6476396.699 | 4910717.986 | -0.39926 | 0.008334 | 0.1881 | 1.0723  | Cyazine                                  | 19.575596  | - | - | - | 231.576  | 241.704688 |
| POS03962 | 849143.0241 | 1337005.494 | 0.654926 | 0.054663 | 0.3261 | 0.55894 | 3,3',5,5'-Tetrachloro-4,4'-biphenyldiol  | 21.244512  | - | - | - | 230.681  | 325.00096  |
| POS03970 | 229563.5955 | 186805.8506 | -0.29735 | 0.705053 | 0.8558 | 0.06367 | 2-Aminomucote                            | -17.947183 | - | - | - | 227.962  | 158.128557 |
| POS03981 | 1147599.886 | 830764.4353 | -0.46611 | 0.051123 | 0.3203 | 0.43194 | 3-Iodo-4-hydroxyphenylpyruvate           | -0.0540117 | - | - | - | 225.052  | 307.06126  |
| POS03982 | 776629.1875 | 656823.2278 | -0.24172 | 0.175056 | 0.501  | 0.22181 | Sodium methallylsulfote                  | -9.9760424 | - | - | - | 224.578  | 159.156999 |
| POS03991 | 1717237.231 | 1516699.955 | -0.17915 | 0.393078 | 0.6624 | 0.19829 | Salvarsan                                | -16.695619 | - | - | - | 223.632  | 440.000947 |
| POS04007 | 263374.8627 | 216835.9757 | -0.28051 | 0.014923 | 0.2218 | 0.18276 | N-phosphocreatinate(2-)                  | 15.547602  | - | - | - | 223.1335 | 210.109528 |
| POS04011 | 23078.4534  | 22037.62206 | -0.06658 | 0.79879  | 0.9083 | 0.00848 | Bropirimine                              | -1.6160298 | - | - | - | 223.086  | 267.100847 |
| POS04034 | 3190865.221 | 3062299.36  | -0.05933 | 0.802784 | 0.91   | 0.06046 | Bronopol                                 | 5.2090646  | - | - | - | 222.284  | 200.996318 |
| POS04046 | 1326445.881 | 390929.8028 | -1.76258 | 0.080031 | 0.3748 | 0.71185 | Succinimide                              | -4.7769668 | - | - | - | 221.182  | 100.094803 |
| POS04068 | 1025452.342 | 849331.6304 | -0.27186 | 0.454324 | 0.7079 | 0.23945 | 3-Bromo-2Z-heptenoic acid                | 11.288422  | - | - | - | 218.589  | 208.074614 |
| POS04076 | 23203379.38 | 15857348.14 | -0.54918 | 0.43032  | 0.689  | 1.43931 | 2,5-Dichloro-2,5-cyclohexadiene-1,4-diol | 9.3940365  | - | - | - | 217.941  | 182.025577 |
| POS04082 | 208422.9312 | 171683.35   | -0.27976 | 0.223714 | 0.5455 | 0.12041 | 5-FU                                     | -23.433209 | - | - | - | 217.261  | 131.081428 |
| POS04091 | 978585.1562 | 1144522.96  | 0.225977 | 0.437544 | 0.695  | 0.21395 | Urate radical                            | 19.766538  | - | - | - | 216.0635 | 168.11288  |
| POS04094 | 36516534.74 | 30163510.27 | -0.27575 | 0.068894 | 0.3541 | 2.00537 | Bromobenzene                             | -18.55415  | - | - | - | 215.7005 | 158.012263 |
| POS04100 | 874078.9332 | 932894.1855 | 0.09395  | 0.777038 | 0.8976 | 0.09113 | Nornitrogen mustard                      | 8.2983523  | - | - | - | 214.866  | 143.035455 |
| POS04102 | 138632.9853 | 70784.89627 | -0.96976 | 0.019619 | 0.2365 | 0.2291  | Sulfur mustard                           | 13.573599  | - | - | - | 214.5755 | 160.086736 |
| POS04103 | 1083943.219 | 817221.6349 | -0.40749 | 0.021143 | 0.2424 | 0.45434 | Oxaloacetate                             | -23.422636 | - | - | - | 214.2445 | 133.075783 |



|          |             |             |          |          |        |         |                                          |            |   |   |   |          |            |
|----------|-------------|-------------|----------|----------|--------|---------|------------------------------------------|------------|---|---|---|----------|------------|
| POS04122 | 1292912.609 | 1261827.731 | -0.03511 | 0.904339 | 0.9559 | 0.00016 | Salvarsan                                | -16.653903 | - | - | - | 210.8885 | 440.000966 |
| POS04129 | 625765.2084 | 679007.0383 | 0.117805 | 0.622095 | 0.8124 | 0.04937 | Calcium L-aspartate                      | -16.540444 | - | - | - | 210.0255 | 172.169245 |
| POS04143 | 11914339.92 | 12293436.97 | 0.045189 | 0.871459 | 0.9428 | 0.35386 | Cyazine                                  | 19.726806  | - | - | - | 206.8465 | 241.704725 |
| POS04160 | 5696978.458 | 4914844.664 | -0.21305 | 0.036    | 0.2855 | 0.70244 | Cryptocyanin                             | 14.40575   | - | - | - | 203.647  | 481.398097 |
| POS04162 | 4673135.982 | 4101759.373 | -0.18815 | 0.246649 | 0.5647 | 0.39959 | Calcium oxalate                          | -17.476522 | - | - | - | 203.159  | 129.102038 |
| POS04192 | 6146874.301 | 6660346.233 | 0.115744 | 0.562017 | 0.776  | 0.38566 | Pyrazinoic acid                          | 19.396135  | - | - | - | 199.098  | 125.107184 |
| POS04202 | 81860.80421 | 40325.81939 | -1.02147 | 0.051194 | 0.3203 | 0.15977 | Pyrazolate                               | -17.866667 | - | - | - | 197.732  | 440.311728 |
| POS04216 | 5801670.128 | 7100663.822 | 0.291486 | 0.601242 | 0.7983 | 0.60337 | Bronopol                                 | 5.272321   | - | - | - | 196.071  | 200.996331 |
| POS04219 | 101607.609  | 124145.9256 | 0.289028 | 0.192375 | 0.519  | 0.11801 | Hydroxyzine                              | -18.040689 | - | - | - | 195.733  | 375.904813 |
| POS04225 | 38338.1554  | 39737.85823 | 0.051733 | 0.774696 | 0.8961 | 0.01662 | Aldotetrauronic acid                     | -20.170384 | - | - | - | 195.399  | 605.504883 |
| POS04229 | 951409.6898 | 766221.1588 | -0.31231 | 0.396863 | 0.6661 | 0.25935 | (S)-Malate                               | -23.813768 | - | - | - | 195.0425 | 135.091483 |
| POS04234 | 1397151.465 | 641007.3642 | -1.12408 | 0.077821 | 0.3724 | 0.67413 | Salvarsan                                | -16.652792 | - | - | - | 194.729  | 440.000966 |
| POS04249 | 2148202.487 | 3161357.808 | 0.557414 | 0.194006 | 0.5197 | 0.72344 | 3-Bromo-2Z-heptenoic acid                | 11.402879  | - | - | - | 194.029  | 208.074638 |
| POS04261 | 5457641.348 | 4131865.45  | -0.40148 | 0.03338  | 0.2802 | 0.92437 | Threote                                  | -24.30564  | - | - | - | 193.377  | 137.107269 |
| POS04275 | 99073059.29 | 98168981.9  | -0.01323 | 0.961389 | 0.9825 | 0.30391 | Bromobenzene                             | -18.553981 | - | - | - | 192.882  | 158.012263 |
| POS04297 | 603170.0352 | 237359.2979 | -1.34549 | 0.346073 | 0.6346 | 0.31396 | Se-Methyl-L-selenocysteine               | 23.120073  | - | - | - | 191.6995 | 183.091286 |
| POS04300 | 371294.2513 | 351862.876  | -0.07755 | 0.77507  | 0.8962 | 0.02027 | cis-Chlorobenzene dihydrodiol            | 1.6373604  | - | - | - | 191.6155 | 250.914486 |
| POS04311 | 9336298.288 | 6176682.443 | -0.59602 | 0.085454 | 0.3847 | 1.38643 | 2,5-Dichloro-2,5-cyclohexadiene-1,4-diol | 9.540357   | - | - | - | 191.173  | 182.025604 |
| POS04315 | 1121173.426 | 1148747.981 | 0.035053 | 0.954806 | 0.98   | 0.03206 | Normitrogen mustard                      | 8.4528608  | - | - | - | 191.035  | 143.035477 |
| POS04323 | 117335.6399 | 73702.992   | -0.67085 | 0.071311 | 0.3591 | 0.15906 | Butechlor                                | -13.359663 | - | - | - | 190.1875 | 310.834137 |
| POS04325 | 1496961.782 | 969156.5796 | -0.62724 | 0.045337 | 0.3118 | 0.54067 | 3-Iodo-4-hydroxyphenylpyruvate           | 0.3171337  | - | - | - | 190.028  | 307.061374 |
| POS04328 | 395538.5661 | 427547.6038 | 0.112267 | 0.494354 | 0.7338 | 0.10655 | Safranin                                 | 24.328394  | - | - | - | 190.022  | 351.860512 |
| POS04334 | 42064.63627 | 57828.50289 | 0.459173 | 0.228226 | 0.5496 | 0.08809 | Bowdichione                              | 9.231148   | - | - | - | 189.6975 | 299.25703  |

|          |             |             |          |          |        |         |                                                         |            |   |   |   |          |            |
|----------|-------------|-------------|----------|----------|--------|---------|---------------------------------------------------------|------------|---|---|---|----------|------------|
| POS04353 | 293017.6306 | 211848.2124 | -0.46796 | 0.118505 | 0.4336 | 0.19298 | Nitarsona                                               | -0.3090056 | - | - | - | 188.19   | 248.0443   |
| POS04357 | 13031662.43 | 3783215.206 | -1.78434 | 0.159991 | 0.4875 | 2.22993 | Potassium iodide                                        | 14.597682  | - | - | - | 188.02   | 167.0125   |
| POS04364 | 243604.319  | 211758.8226 | -0.20212 | 0.418111 | 0.6797 | 0.1059  | Triasulfuron                                            | -20.299409 | - | - | - | 187.6935 | 402.82442  |
| POS04387 | 395029.4883 | 247308.535  | -0.67565 | 0.003075 | 0.1183 | 0.35522 | 2-Oxoglutaramate                                        | -22.762418 | - | - | - | 186.349  | 146.117373 |
| POS04392 | 86317.1559  | 82616.78437 | -0.06321 | 0.823354 | 0.9188 | 0.0103  | Tepoxalin                                               | -11.223612 | - | - | - | 185.692  | 386.847046 |
| POS04406 | 1861735.644 | 1994268.783 | 0.099212 | 0.701586 | 0.8537 | 0.16066 | Citrate                                                 | 12.837591  | - | - | - | 185.047  | 193.133243 |
| POS04407 | 3799881.9   | 2018150.234 | -0.91292 | 0.000148 | 0.0721 | 1.29922 | Isopentenyl phosphate                                   | -10.928652 | - | - | - | 185.0275 | 167.117661 |
| POS04413 | 10226941.74 | 7823855.041 | -0.38642 | 0.013318 | 0.2135 | 1.37795 | Trimethylselenonium                                     | -0.5395521 | - | - | - | 184.7085 | 125.07081  |
| POS04416 | 2576079.956 | 2278134.632 | -0.17732 | 0.296129 | 0.6098 | 0.2633  | Oxalosuccite                                            | 14.161119  | - | - | - | 184.7005 | 191.117569 |
| POS04424 | 3874855.12  | 2625353.601 | -0.56163 | 0.387259 | 0.6585 | 0.63933 | cis-4-Carboxymethylenebut-2-<br>-on-4-olide             | 8.0723143  | - | - | - | 184.423  | 141.102007 |
| POS04427 | 934098.2784 | 779239.7055 | -0.26151 | 0.017147 | 0.2275 | 0.32705 | Calcium glycerophosphate                                | 3.5412678  | - | - | - | 184.38   | 211.143821 |
| POS04432 | 1552414.63  | 905396.6576 | -0.77789 | 0.04782  | 0.3143 | 0.6771  | p-Aminobenzamidine<br>dihydrochloride                   | 18.788174  | - | - | - | 184.365  | 209.099486 |
| POS04439 | 398011.2654 | 354977.8858 | -0.16508 | 0.345322 | 0.6341 | 0.10847 | 3-Phospho-D-glyceroyl<br>phosphate                      | -7.6096204 | - | - | - | 184.349  | 267.042352 |
| POS04441 | 1371824.53  | 1015264.241 | -0.43424 | 0.009081 | 0.1917 | 0.51663 | 4-Amino-2-methyl-5-<br>(phosphooxymethyl)pyrim<br>idine | 6.6623756  | - | - | - | 184.3195 | 220.143837 |
| POS04442 | 1997521.248 | 1869776.502 | -0.09535 | 0.790171 | 0.9034 | 0.10617 | Stipitatote                                             | -17.945894 | - | - | - | 184.3085 | 209.128042 |
| POS04446 | 71873.89584 | 69073.30418 | -0.05734 | 0.83823  | 0.9265 | 0.0114  | 3-keto Fusidic acid                                     | 5.959136   | - | - | - | 184.259  | 531.703139 |
| POS04466 | 1342060.645 | 1105616.56  | -0.2796  | 0.010378 | 0.1964 | 0.41688 | 2,4-Dinitroaniline                                      | 22.385338  | - | - | - | 184.0335 | 184.132976 |
| POS04474 | 1017605.919 | 1094866.334 | 0.105576 | 0.648489 | 0.8276 | 0.13177 | 5-Nitrofurfural                                         | -19.556877 | - | - | - | 184.025  | 142.086117 |
| POS04478 | 3677575.483 | 4042339.781 | 0.136436 | 0.638761 | 0.8217 | 0.32988 | Trifluoromethanesulfonic<br>acid                        | 14.34389   | - | - | - | 184.019  | 151.086429 |
| POS04482 | 1455906.279 | 1124257.872 | -0.37294 | 0.015813 | 0.2226 | 0.50729 | 3-(Imidazol-4-yl)-2-<br>oxopropyl phosphate             | 5.0794301  | - | - | - | 184      | 221.128195 |
| POS04483 | 1395206.906 | 1231228.538 | -0.18038 | 0.293817 | 0.6082 | 0.2221  | Tetrahydroxypteridine                                   | 1.8047864  | - | - | - | 183.978  | 197.128031 |
| POS04487 | 1448238.44  | 1425730.879 | -0.0226  | 0.90621  | 0.9567 | 0.03199 | D-Ribose 5-phosphate                                    | -20.517095 | - | - | - | 183.894  | 231.112355 |
| POS04489 | 1308012.74  | 1392313.429 | 0.090107 | 0.731424 | 0.8719 | 0.07782 | 5-Amino-4-<br>imidazolecarboxamide                      | -8.3754831 | - | - | - | 183.8905 | 127.12282  |

|          |             |             |          |          |        |         |                                             |            |   |   |   |          |            |
|----------|-------------|-------------|----------|----------|--------|---------|---------------------------------------------|------------|---|---|---|----------|------------|
| POS04497 | 152317.6398 | 87088.38493 | -0.80653 | 0.021185 | 0.2424 | 0.22377 | Phenylmercury acetate                       | 24.841768  | - | - | - | 183.8525 | 337.753542 |
| POS04503 | 946158.8472 | 1743301.347 | 0.881668 | 0.447532 | 0.7021 | 0.50245 | 2,5-Furandicarboxylate                      | -20.935939 | - | - | - | 183.7875 | 157.097009 |
| POS04511 | 1105151.239 | 1089639.903 | -0.02039 | 0.928239 | 0.9674 | 0.01744 | D-Ribitol 5-phosphate                       | -21.636497 | - | - | - | 183.72   | 233.127954 |
| POS04519 | 1968143.037 | 1549989.702 | -0.34458 | 0.039206 | 0.2958 | 0.5408  | Methyl 2-propenyl selenide                  | -12.533923 | - | - | - | 183.702  | 136.075584 |
| POS04531 | 1089207.387 | 811560.552  | -0.42451 | 0.052192 | 0.3219 | 0.40491 | unsym-Bis(4'-chlorophenyl)ethylene          | 2.3161215  | - | - | - | 183.685  | 250.143054 |
| POS04532 | 401247.9361 | 293015.7761 | -0.45352 | 0.455338 | 0.7084 | 0.21142 | 5-FU                                        | -23.771404 | - | - | - | 183.6825 | 131.081384 |
| POS04533 | 2583942.079 | 2155475.584 | -0.26157 | 0.211411 | 0.5346 | 0.35743 | 3-Oxalomalate                               | -9.1726574 | - | - | - | 183.68   | 207.112386 |
| POS04535 | 1636100.709 | 1618999.695 | -0.01516 | 0.937972 | 0.972  | 0.03097 | O-Phospho-4-hydroxy-L-threonine             | -19.889045 | - | - | - | 183.6485 | 216.101498 |
| POS04536 | 3175179.677 | 2340844.727 | -0.43981 | 0.054075 | 0.3242 | 0.69299 | 2,3,6-Trihydroxypyridine                    | 11.415018  | - | - | - | 183.6475 | 128.106827 |
| POS04548 | 3059751.134 | 2564302.108 | -0.25485 | 0.378921 | 0.653  | 0.37416 | [5-(Aminomethyl)furan-3-yl]methyl phosphate | 21.66743   | - | - | - | 183.505  | 208.132864 |
| POS04552 | 158948.5855 | 128414.0275 | -0.30776 | 0.040752 | 0.2986 | 0.15394 | S)-tetrahydroxy-5beta-cholestan-27-ol       | 13.052271  | - | - | - | 183.415  | 451.673159 |
| POS04559 | 181057.0033 | 143742.4098 | -0.33296 | 0.228827 | 0.5501 | 0.13082 | 1-Cyclohexyl-11-heneicosanone               | 16.183322  | - | - | - | 183.381  | 393.714832 |
| POS04566 | 141202.303  | 113808.6273 | -0.31115 | 0.255599 | 0.5732 | 0.12462 | 1,26-Hexacosanediol                         | -18.115511 | - | - | - | 183.378  | 399.705854 |
| POS04573 | 445410.0146 | 392271.6409 | -0.18328 | 0.122722 | 0.4403 | 0.16026 | Pentacosanoylglycine                        | 23.526785  | - | - | - | 183.3745 | 440.732222 |
| POS04579 | 873507.1912 | 676619.6925 | -0.36847 | 0.013832 | 0.2168 | 0.39389 | Apraclonidine                               | -15.794345 | - | - | - | 183.371  | 246.111905 |
| POS04584 | 213030.2382 | 202562.1185 | -0.07269 | 0.65096  | 0.829  | 0.03348 | Kolaflavanone                               | -19.693646 | - | - | - | 183.362  | 589.510787 |
| POS04589 | 907073.9421 | 911806.6449 | 0.007508 | 0.988185 | 0.9937 | 0.05595 | S-(1,2-Dichlorovinyl)-L-cysteine            | 17.922703  | - | - | - | 183.357  | 217.096749 |
| POS04617 | 1065741.151 | 1034543.71  | -0.04286 | 0.88008  | 0.9466 | 0.04629 | 4-Nitrophenyl phosphate                     | 2.5749694  | - | - | - | 183.1255 | 220.096541 |
| POS04621 | 81747.7403  | 90354.91338 | 0.144424 | 0.557913 | 0.7733 | 0.0314  | 2-Methylhexacosane                          | -24.151714 | - | - | - | 183.0535 | 381.731581 |
| POS04633 | 610347.667  | 466776.3646 | -0.3869  | 0.006704 | 0.1711 | 0.35336 | 5alpha-Cyprinol                             | -8.7195209 | - | - | - | 183.044  | 453.67033  |
| POS04634 | 1257346.998 | 722584.5381 | -0.79914 | 0.010467 | 0.1964 | 0.64456 | 2-Chloroethanol                             | -4.6651054 | - | - | - | 183.0425 | 81.520401  |
| POS04638 | 58585.43976 | 50107.02044 | -0.22553 | 0.166041 | 0.493  | 0.06564 | Demethylphyloquinol                         | -5.1919106 | - | - | - | 183.041  | 439.689999 |
| POS04640 | 665557.4368 | 437909.119  | -0.60393 | 0.039893 | 0.2968 | 0.39029 | Barban                                      | -3.6457894 | - | - | - | 183.0385 | 259.107036 |

|          |             |             |          |          |        |         |                                                                                 |            |   |   |   |          |            |
|----------|-------------|-------------|----------|----------|--------|---------|---------------------------------------------------------------------------------|------------|---|---|---|----------|------------|
| POS04648 | 97894.06961 | 67892.50419 | -0.52797 | 0.010585 | 0.1971 | 0.15906 | 20-COOH-leukotriene E4                                                          | 6.3262146  | - | - | - | 183.0255 | 470.602247 |
| POS04651 | 74295.99955 | 46910.97422 | -0.66336 | 0.026352 | 0.2576 | 0.13686 | Indapamide                                                                      | 11.565164  | - | - | - | 183.012  | 366.846508 |
| POS04653 | 298627.6697 | 248183.335  | -0.26694 | 0.130178 | 0.4485 | 0.15497 | Calystatin A                                                                    | -0.8447214 | - | - | - | 183.001  | 457.664191 |
| POS04660 | 1055131.82  | 954302.5982 | -0.1449  | 0.290165 | 0.6045 | 0.16065 | Dichlormid                                                                      | -3.3754879 | - | - | - | 182.879  | 209.091574 |
| POS04665 | 699180.843  | 663407.9557 | -0.07577 | 0.666637 | 0.8359 | 0.06613 | Se-Propenylselenocysteine<br>Se-oxide                                           | -3.8517779 | - | - | - | 182.725  | 225.122813 |
| POS04669 | 3464552.238 | 2649438.378 | -0.38698 | 0.050639 | 0.3192 | 0.68556 | Thenylchlor                                                                     | -9.8537491 | - | - | - | 182.718  | 324.841686 |
| POS04674 | 315507.2357 | 270783.7004 | -0.22053 | 0.075409 | 0.3679 | 0.13977 | S-(4-Bromophenyl)-<br>mercaptopyruvate                                          | -15.624998 | - | - | - | 182.714  | 276.122078 |
| POS04675 | 748398.8218 | 631292.1123 | -0.2455  | 0.175021 | 0.501  | 0.20747 | Glyphosate                                                                      | 3.4921699  | - | - | - | 182.7125 | 170.080967 |
| POS04686 | 616616.6205 | 605747.7027 | -0.02566 | 0.882737 | 0.9474 | 0.02469 | Benoxacor                                                                       | -3.9878068 | - | - | - | 182.703  | 261.122739 |
| POS04687 | 6411718.605 | 5188587.897 | -0.30537 | 0.093387 | 0.3962 | 0.75628 | Cyanidin                                                                        | 3.0315167  | - | - | - | 182.7015 | 288.252347 |
| POS04688 | 479871.6927 | 396943.017  | -0.27372 | 0.178296 | 0.5043 | 0.18754 | 1,5-dichloro-3,14-dimethoxy-<br>7,12-dimethyl-6-(3-<br>methoxybut-2-en-1-yl)-10 | -20.231132 | - | - | - | 182.699  | 403.829127 |
| POS04693 | 909999.3878 | 850015.2797 | -0.09838 | 0.450239 | 0.7041 | 0.10605 | Dihydrokaempferol                                                               | -12.98462  | - | - | - | 182.696  | 289.255734 |
| POS04695 | 856996.2955 | 783305.7777 | -0.12971 | 0.55008  | 0.7693 | 0.12663 | 3-(Phosphoacetylamido)-<br>L-alanine                                            | 8.220319   | - | - | - | 182.6955 | 243.133067 |
| POS04696 | 113664.6905 | 95922.4175  | -0.24484 | 0.477763 | 0.7223 | 0.06807 | F5231                                                                           | 16.216039  | - | - | - | 182.695  | 382.799568 |
| POS04700 | 62855.37839 | 52639.60209 | -0.25589 | 0.397152 | 0.6662 | 0.05282 | 7-Chloro-3,4',5,6,8-<br>pentamethoxyflavone                                     | 4.2258167  | - | - | - | 182.601  | 407.822996 |
| POS04707 | 222425.8851 | 175031.5964 | -0.34571 | 0.063089 | 0.3422 | 0.17375 | Chloreyclizine                                                                  | -24.91315  | - | - | - | 182.482  | 301.825782 |
| POS04713 | 721330.574  | 619078.0483 | -0.22054 | 0.669229 | 0.837  | 0.09503 | (1S,3R)-3-(2,2-<br>Dichloroethenyl)-2,2-<br>dimethylcyclopropanecarb            | -7.3821019 | - | - | - | 182.393  | 210.075533 |
| POS04714 | 655865.8442 | 696414.6347 | 0.086546 | 0.831005 | 0.9228 | 0.10353 | Alendronic acid                                                                 | 14.133109  | - | - | - | 182.379  | 250.106797 |
| POS04719 | 546220.3711 | 434858.1846 | -0.32894 | 0.242668 | 0.5618 | 0.25477 | Stigmastane                                                                     | -3.7442225 | - | - | - | 182.37   | 401.728976 |
| POS04724 | 56830.12603 | 40759.4413  | -0.47952 | 0.084297 | 0.3821 | 0.0921  | 4-Chloroprogestrone                                                             | 0.9822212  | - | - | - | 182.363  | 349.914419 |
| POS04735 | 816942.253  | 632139.4039 | -0.36999 | 0.00924  | 0.1917 | 0.37959 | Butachlor                                                                       | 13.715195  | - | - | - | 182.261  | 312.858354 |
| POS04738 | 374368.2178 | 344652.5314 | -0.11932 | 0.669666 | 0.837  | 0.07607 | BMS 204352                                                                      | -20.599629 | - | - | - | 182.1935 | 360.702567 |
| POS04742 | 317357.1495 | 226824.4854 | -0.48453 | 0.00718  | 0.1779 | 0.26598 | Cyazofamid                                                                      | 9.5658222  | - | - | - | 182.125  | 325.796283 |

|          |             |             |          |          |        |         |                                                                                                  |            |   |   |   |          |            |
|----------|-------------|-------------|----------|----------|--------|---------|--------------------------------------------------------------------------------------------------|------------|---|---|---|----------|------------|
| POS04783 | 360412.3041 | 199800.6802 | -0.85109 | 0.059461 | 0.3364 | 0.31293 | Haloxyfop                                                                                        | -22.254818 | - | - | - | 181.8525 | 362.699627 |
| POS04794 | 1506520.208 | 1468155.265 | -0.03722 | 0.822046 | 0.9184 | 0.05671 | 1,7-diphospho-1-epi-valienol                                                                     | 20.717771  | - | - | - | 181.716  | 337.14124  |
| POS04796 | 4320840.501 | 4950834.053 | 0.19636  | 0.669781 | 0.837  | 0.3742  | 2,6-Dibromohydroquinone                                                                          | 23.508577  | - | - | - | 181.7125 | 268.916375 |
| POS04801 | 70641034.81 | 57771659.51 | -0.29014 | 0.022149 | 0.2454 | 2.86763 | Cyazine                                                                                          | 19.318607  | - | - | - | 181.673  | 241.704626 |
| POS04808 | 10126837.73 | 8454058.213 | -0.26047 | 0.067083 | 0.3515 | 0.9559  | N-(2,5-Dihydroxybenzoyl)-L-12,15,14-trimethoxy-9-oxo-8,17-dioxatetralone 7000                    | 6.2886937  | - | - | - | 181.6235 | 242.206193 |
| POS04821 | 589344.0964 | 546709.9681 | -0.10833 | 0.489586 | 0.7306 | 0.0743  | Chondroitin sulfate                                                                              | -0.6995524 | - | - | - | 181.372  | 343.266037 |
| POS04833 | 207945.5002 | 196686.1637 | -0.08031 | 0.754895 | 0.8858 | 0.00659 | Iodate                                                                                           | -10.801753 | - | - | - | 181.057  | 464.371271 |
| POS04835 | 7960298.105 | 3628347.674 | -1.13351 | 0.000355 | 0.0721 | 2.04822 | 6-[2,5-dimethoxy-3-(5,5,7-trihydroxy-3,4-dihydro-2H-1-benzopyran-2-yl)oxy]phenol                 | 16.641784  | - | - | - | 181.047  | 175.912887 |
| POS04866 | 934313.9795 | 726346.9753 | -0.36325 | 0.256712 | 0.5746 | 0.26334 | Cryptocyanin                                                                                     | 6.8419402  | - | - | - | 180.376  | 483.404577 |
| POS04875 | 26833204.37 | 14615582.71 | -0.87651 | 0.18995  | 0.5169 | 2.15616 | 4-Bromophenol                                                                                    | 14.509507  | - | - | - | 180.309  | 481.398147 |
| POS04881 | 529479.1065 | 481082.294  | -0.13829 | 0.459059 | 0.7112 | 0.10978 | Bismuth                                                                                          | -24.486489 | - | - | - | 180.068  | 174.01034  |
| POS04892 | 2817420.152 | 2424771.285 | -0.21653 | 0.469921 | 0.718  | 0.31469 | C.I. Acid Yellow 17                                                                              | -4.2524258 | - | - | - | 179.91   | 209.986788 |
| POS04895 | 38041.0567  | 38014.77302 | -0.001   | 0.992341 | 0.996  | 0.0056  | 3-Fluoro-cis,cis-mucote                                                                          | 10.495548  | - | - | - | 179.716  | 508.337601 |
| POS04907 | 1789936.53  | 1280827.789 | -0.48283 | 0.014272 | 0.218  | 0.6006  | 2-O-[2-O-(cupna-D-Mannopyranosyl)-alpha-D-glucopyranosyl]-3-O-digalloylglucosyl-phenacetophenone | -0.378353  | - | - | - | 179.033  | 161.107116 |
| POS04909 | 187620.2687 | 174189.4568 | -0.10716 | 0.439745 | 0.6968 | 0.06569 | Atheroline                                                                                       | 21.89586   | - | - | - | 178.726  | 511.356851 |
| POS04917 | 68498.3318  | 51479.47828 | -0.41207 | 0.117035 | 0.432  | 0.08847 | alpha-D-Galactosyl-N-acetyllactosamine                                                           | 9.6839019  | - | - | - | 177.323  | 635.509221 |
| POS04918 | 537084.8386 | 594881.5543 | 0.147452 | 0.681973 | 0.8435 | 0.07539 | Dinitrosopentamethylenetetramine                                                                 | 20.784629  | - | - | - | 177.314  | 338.340388 |
| POS04919 | 63344.2338  | 68636.15761 | 0.115755 | 0.558587 | 0.7736 | 0.04195 | Calcium oxalate                                                                                  | -19.509005 | - | - | - | 177.147  | 546.485635 |
| POS04920 | 6866391.18  | 4815635.047 | -0.51183 | 0.057375 | 0.3315 | 1.16151 | 23-Hydroxyphysalolactone                                                                         | 5.6192866  | - | - | - | 177.044  | 187.180223 |
| POS04929 | 3630817.115 | 3447020.407 | -0.07494 | 0.724167 | 0.8676 | 0.14369 | 1-Methyladenosine                                                                                | -17.215802 | - | - | - | 176.314  | 129.102071 |
| POS04930 | 122494.5579 | 108950.5874 | -0.16904 | 0.433651 | 0.6919 | 0.06001 | Dihydrobiopterin                                                                                 | -22.512328 | - | - | - | 176.278  | 556.051781 |
| POS04934 | 80479.49345 | 103389.3275 | 0.361394 | 0.460134 | 0.7119 | 0.08802 |                                                                                                  | 11.073249  | - | - | - | 176.0405 | 282.278291 |
| POS04936 | 1398645.079 | 1082467.636 | -0.36971 | 0.363016 | 0.6446 | 0.37114 |                                                                                                  | 18.489288  | - | - | - | 175.94   | 240.2429   |

|          |             |             |          |          |        |         |                                                      |            |   |   |   |          |            |
|----------|-------------|-------------|----------|----------|--------|---------|------------------------------------------------------|------------|---|---|---|----------|------------|
| POS04943 | 154091.2329 | 196925.4594 | 0.353865 | 0.049924 | 0.3189 | 0.17958 | DG(22:3(4Z,7Z,10Z,13Z,16Z)/22:6(4Z,7Z,10Z,13Z,16Z))  | -6.2163722 | - | - | - | 175.354  | 716.058532 |
| POS04947 | 300530.9352 | 358017.068  | 0.252515 | 0.343889 | 0.6332 | 0.1174  | DG(22:3(4Z,7Z,10Z,13Z,16Z)/22:6(4Z,7Z,10Z,13Z,16Z))  | 20.615054  | - | - | - | 175.0845 | 714.061776 |
| POS04949 | 5495930.804 | 3712547.503 | -0.56595 | 0.020635 | 0.2393 | 1.08178 | Pyrazinoic acid                                      | 19.398815  | - | - | - | 174.939  | 125.107184 |
| POS04950 | 161924.6636 | 149773.3862 | -0.11254 | 0.700492 | 0.853  | 0.01636 | Koryoginsenoside R1                                  | -22.071234 | - | - | - | 174.908  | 870.074695 |
| POS04951 | 1368558.63  | 1752672.699 | 0.356899 | 0.180998 | 0.5068 | 0.39819 | 5-Hydroxy-2-methylpyridine-4,5-dicarboxylate         | -18.698579 | - | - | - | 174.898  | 198.14849  |
| POS04956 | 6206009.92  | 5119871.579 | -0.27756 | 0.449403 | 0.7037 | 0.61887 | 2,4-Dihydroxypteridine                               | -9.9676991 | - | - | - | 174.591  | 165.127241 |
| POS04957 | 854026.1996 | 722296.5267 | -0.24169 | 0.053126 | 0.3235 | 0.27473 | N-Acetyldemethylphosphinotriazine                    | 20.175518  | - | - | - | 174.591  | 210.148396 |
| POS04960 | 947534.9829 | 765045.1752 | -0.30863 | 0.023636 | 0.2494 | 0.34687 | 2-Methyl-5-hydroxy-3-formylpyridine-4-carboxylate    | 5.3589604  | - | - | - | 174.564  | 182.153747 |
| POS04966 | 208731.1602 | 257095.2814 | 0.300657 | 0.093681 | 0.3967 | 0.17004 | Pectenotoxin 1                                       | 10.583661  | - | - | - | 174.252  | 876.066238 |
| POS04971 | 3716298.004 | 3794110.066 | 0.029895 | 0.863008 | 0.9376 | 0.03565 | Threote                                              | -24.596734 | - | - | - | 173.906  | 137.107229 |
| POS04980 | 350173.011  | 338608.6771 | -0.04845 | 0.872225 | 0.9428 | 0.02227 | Trichloro(docosyl)silane                             | 10.918837  | - | - | - | 173.552  | 445.052125 |
| POS04982 | 317652.0446 | 414096.3596 | 0.382519 | 0.149813 | 0.4753 | 0.21208 | Avermectin A1b                                       | -16.219453 | - | - | - | 173.3565 | 874.070016 |
| POS04984 | 192977.206  | 211134.0488 | 0.129729 | 0.613652 | 0.8077 | 0.05803 | SM(d18:0/16:0)                                       | 18.145178  | - | - | - | 173.217  | 707.071988 |
| POS04997 | 1155273.065 | 990209.2678 | -0.22243 | 0.411363 | 0.6761 | 0.17297 | SM C16:1                                             | 5.7034485  | - | - | - | 172.177  | 717.058161 |
| POS04998 | 1459514.852 | 1205085.906 | -0.27635 | 0.047375 | 0.3143 | 0.42427 | 5-Amino-4-imidazolecarboxamide                       | -8.073721  | - | - | - | 172.137  | 127.122858 |
| POS05008 | 432739.439  | 409398.0115 | -0.07999 | 0.760857 | 0.8884 | 0.03264 | PC(14:0/P-18:0)                                      | 11.326037  | - | - | - | 171.487  | 719.054909 |
| POS05033 | 272450.3788 | 254581.558  | -0.09787 | 0.757964 | 0.8874 | 0.0452  | Victorin C                                           | -19.627485 | - | - | - | 170.58   | 817.071659 |
| POS05038 | 940532.8789 | 762667.1295 | -0.30242 | 0.26879  | 0.5858 | 0.25372 | 2-Hydroxymucote semialdehyde                         | 7.6480077  | - | - | - | 170.3375 | 143.117763 |
| POS05041 | 742643.6434 | 746276.2553 | 0.00704  | 0.977476 | 0.9893 | 0.04757 | Isocil                                               | -14.531699 | - | - | - | 169.871  | 248.092786 |
| POS05046 | 254747.071  | 276366.5561 | 0.117517 | 0.732549 | 0.8729 | 0.07818 | Potassium bromide                                    | 12.650318  | - | - | - | 169.4035 | 120.011082 |
| POS05050 | 415691.135  | 423227.2899 | 0.025921 | 0.852026 | 0.9327 | 0.03908 | Nitrosylsulfuric acid                                | -20.842274 | - | - | - | 168.164  | 128.081628 |
| POS05053 | 5035530.533 | 3879867.417 | -0.37614 | 0.059736 | 0.3366 | 0.82485 | Oxaloacetate                                         | -22.519889 | - | - | - | 167.905  | 133.075902 |
| POS05060 | 49965.89934 | 60515.15032 | 0.276353 | 0.612539 | 0.8073 | 0.03633 | 2,4,5-trihydroxy-3-(3,4,5-trihydroxybenzoyl)pyruvate | 7.0139296  | - | - | - | 167.347  | 548.392116 |

|          |             |             |          |          |        |         |                                                                  |            |   |   |   |          |            |
|----------|-------------|-------------|----------|----------|--------|---------|------------------------------------------------------------------|------------|---|---|---|----------|------------|
| POS05071 | 308302.5428 | 234699.2874 | -0.39353 | 0.071607 | 0.36   | 0.21153 | 2,6-Dichloroindophenol                                           | -9.8858688 | - | - | - | 166.353  | 269.100126 |
| POS05073 | 3005011.479 | 2220400.286 | -0.43655 | 0.030684 | 0.2697 | 0.76186 | 2,6-Dichloroindophenol                                           | 14.389882  | - | - | - | 166.142  | 269.106634 |
| POS05081 | 16150647.28 | 18008710.56 | 0.157103 | 0.737675 | 0.8757 | 0.19397 | Cryptocyanin                                                     | 14.617442  | - | - | - | 165.792  | 481.398199 |
| POS05091 | 779960.4542 | 1152060.361 | 0.562743 | 0.283086 | 0.5991 | 0.34556 | 0-[2,3-dimethoxy-3-(3,5,7-trihydroxy-3,4-dihydro-2H-1-benzoxan-2 | 6.9688365  | - | - | - | 165.68   | 483.404638 |
| POS05104 | 347289.8824 | 214895.4348 | -0.69251 | 0.025819 | 0.2571 | 0.31001 | 4-Bromophenol                                                    | -24.476738 | - | - | - | 165.264  | 174.010342 |
| POS05105 | 4443615.955 | 3347531.594 | -0.40864 | 0.020273 | 0.2381 | 0.89758 | Iodate                                                           | 16.658966  | - | - | - | 165.264  | 175.91289  |
| POS05119 | 1418128.387 | 1135180.844 | -0.32107 | 0.019453 | 0.2351 | 0.44266 | Bismuth                                                          | -4.2731319 | - | - | - | 164.766  | 209.986784 |
| POS05125 | 762892.7188 | 644852.7458 | -0.24251 | 0.059147 | 0.3361 | 0.25884 | N,N'-Dimethylurea                                                | -4.4622979 | - | - | - | 164.672  | 89.1152834 |
| POS05143 | 964277.2939 | 544785.5138 | -0.82376 | 0.070215 | 0.357  | 0.48469 | Thenylchlor                                                      | -9.7114292 | - | - | - | 164.067  | 324.841732 |
| POS05153 | 1715203.95  | 1361252.248 | -0.33345 | 0.115439 | 0.43   | 0.39863 | Dichlormid                                                       | -3.0112379 | - | - | - | 163.999  | 209.09165  |
| POS05161 | 1258781.475 | 1343979.196 | 0.094483 | 0.758953 | 0.8875 | 0.14869 | Creatinine                                                       | 22.006177  | - | - | - | 163.7095 | 114.127666 |
| POS05170 | 122767.6622 | 94033.76122 | -0.38468 | 0.133774 | 0.4541 | 0.12349 | Stearoylcarnitine                                                | 8.8241267  | - | - | - | 163.6    | 428.67195  |
| POS05177 | 5122445.327 | 3857661.743 | -0.40911 | 0.316811 | 0.6253 | 0.74337 | Isopentenyl phosphate                                            | -10.589861 | - | - | - | 163.156  | 167.117717 |
| POS05180 | 100981.7373 | 99635.54698 | -0.01936 | 0.92804  | 0.9674 | 0.00825 | ((0-[2,1-dimethoxy-4-oxo-8-(3,4,5-trihydroxyoxan-2-              | -1.7323514 | - | - | - | 163.079  | 677.556105 |
| POS05192 | 72050.23462 | 57601.62917 | -0.32289 | 0.198038 | 0.5236 | 0.08102 | Octacosanal                                                      | -19.381366 | - | - | - | 162.983  | 409.742955 |
| POS05193 | 226837.5995 | 230964.5672 | 0.026012 | 0.899965 | 0.9537 | 0.01679 | Bis(4-nitrophenyl)phosphate                                      | -23.394965 | - | - | - | 162.979  | 341.181518 |
| POS05202 | 138967.4115 | 25202.85486 | -2.46309 | 0.307649 | 0.6189 | 0.17851 | DIBOA-glucoside                                                  | 12.457276  | - | - | - | 162.665  | 344.297653 |
| POS05203 | 72206.52784 | 68636.63165 | -0.07315 | 0.758369 | 0.8874 | 0.01478 | ((0-[2-(3,4-dihydroxyphenyl)-5,7-dihydroxy-4-oxo-2,1,4-          | -23.276903 | - | - | - | 162.665  | 691.571202 |
| POS05209 | 694201.765  | 379211.9001 | -0.87235 | 0.034856 | 0.2838 | 0.45149 | Dianthalexin                                                     | -6.6781041 | - | - | - | 162.655  | 240.231879 |
| POS05211 | 900386.3202 | 577139.9922 | -0.64162 | 0.006204 | 0.1646 | 0.52413 | Fenoldopam                                                       | 2.9620437  | - | - | - | 162.652  | 306.764282 |
| POS05214 | 148311.7162 | 136128.8265 | -0.12366 | 0.533063 | 0.7588 | 0.04782 | Hydroxypyruvate                                                  | 8.7247426  | - | - | - | 162.529  | 105.069685 |
| POS05218 | 396436.6289 | 423453.9038 | 0.095115 | 0.887725 | 0.9486 | 0.01234 | 3,5-Dinitrosalicylic acid                                        | -24.809656 | - | - | - | 162.412  | 229.117517 |
| POS05219 | 449550.2294 | 225543.8557 | -0.99507 | 0.001956 | 0.0991 | 0.44859 | SQ 26180                                                         | -4.9482589 | - | - | - | 162.396  | 239.224498 |

|          |             |             |          |          |        |         |  |                                           |            |   |   |   |          |            |
|----------|-------------|-------------|----------|----------|--------|---------|--|-------------------------------------------|------------|---|---|---|----------|------------|
| POS05222 | 137053.2095 | 103905.6315 | -0.39946 | 0.052361 | 0.3227 | 0.14401 |  | 2-Bromomaleylacetate                      | 24.957083  | - | - | - | 162.325  | 238.018092 |
| POS05232 | 222754.7689 | 172059.7396 | -0.37255 | 0.495303 | 0.7341 | 0.10932 |  | Nebularine                                | 3.709287   | - | - | - | 162.309  | 253.234912 |
| POS05234 | 992943.5283 | 960499.3751 | -0.04793 | 0.78147  | 0.8994 | 0.02975 |  | (S)-Malate                                | -23.109282 | - | - | - | 162.1525 | 135.091578 |
| POS05237 | 2527202.573 | 2349114.612 | -0.10542 | 0.687056 | 0.8457 | 0.11879 |  | 1,7-diphospho-1-epi-valienol              | 20.847112  | - | - | - | 161.994  | 337.141284 |
| POS05241 | 81550.94451 | 85119.30055 | 0.061785 | 0.832781 | 0.9237 | 0.01922 |  | Bupranolol                                | 13.562851  | - | - | - | 161.986  | 272.793963 |
| POS05247 | 89807.18262 | 70364.81543 | -0.35198 | 0.123601 | 0.4411 | 0.10309 |  | N1-(2-Hydroxyethyl)flurazepam             | 1.1205885  | - | - | - | 161.974  | 347.790665 |
| POS05255 | 135123.7587 | 108286.3158 | -0.31943 | 0.311765 | 0.6218 | 0.09325 |  | 3-oxobrimonidine                          | 13.841913  | - | - | - | 161.6575 | 311.16157  |
| POS05265 | 1275633.858 | 1228633.305 | -0.05416 | 0.756692 | 0.8869 | 0.03022 |  | 3-(Phosphoacetylamido)-L-alanine          | 8.6029025  | - | - | - | 161.3125 | 243.13316  |
| POS05268 | 4890903.187 | 4440274.892 | -0.13945 | 0.219207 | 0.5401 | 0.39532 |  | Pyrazinoic acid                           | 19.584622  | - | - | - | 161.3095 | 125.107207 |
| POS05269 | 1065712.622 | 417855.9604 | -1.35074 | 0.075697 | 0.3687 | 0.60915 |  | 5,6-Dihydrothymine                        | 15.569654  | - | - | - | 161.309  | 129.138472 |
| POS05270 | 59501.88683 | 52616.86287 | -0.17741 | 0.461156 | 0.7119 | 0.05078 |  | Vecuronium                                | -0.7996784 | - | - | - | 161.308  | 558.834231 |
| POS05279 | 137516.5774 | 114492.7677 | -0.26435 | 0.348591 | 0.636  | 0.09185 |  | UDP-N-acetylmuramoyl-L-alanyl-D-glutamate | -23.594229 | - | - | - | 161.016  | 880.594723 |
| POS05280 | 32825.24274 | 19552.54641 | -0.74745 | 0.054343 | 0.3251 | 0.08655 |  | Pencycuron                                | -9.1343088 | - | - | - | 161.014  | 329.840073 |
| POS05294 | 417756.5891 | 324656.2961 | -0.36375 | 0.02013  | 0.2381 | 0.2561  |  | 3-Phospho-D-glyceroyl phosphate           | -7.4246424 | - | - | - | 160.6505 | 267.042401 |
| POS05295 | 3715940.278 | 3726959.843 | 0.004272 | 0.991052 | 0.9956 | 0.10854 |  | 3-Oxalomalate                             | -8.7747023 | - | - | - | 160.6385 | 207.112468 |
| POS05296 | 3695618.144 | 4239463.782 | 0.198066 | 0.641487 | 0.8239 | 0.21635 |  | Stipitatote                               | -17.73039  | - | - | - | 160.637  | 209.128086 |
| POS05301 | 3453895.082 | 3385887.351 | -0.02869 | 0.924641 | 0.9659 | 0.01013 |  | Oxalosuccite                              | 14.415585  | - | - | - | 160.391  | 191.117617 |
| POS05306 | 1157778.121 | 987333.5463 | -0.22975 | 0.02957  | 0.2674 | 0.33844 |  | Dopaquinone                               | 6.0520068  | - | - | - | 160.302  | 196.180558 |
| POS05313 | 2179494.963 | 2189934.699 | 0.006894 | 0.972882 | 0.9873 | 0.07121 |  | Citrate                                   | 13.257476  | - | - | - | 160.1375 | 193.133324 |
| POS05316 | 8142911.775 | 7029857.514 | -0.21205 | 0.329801 | 0.6326 | 0.60384 |  | Cyanidin                                  | 3.3242361  | - | - | - | 159.702  | 288.252431 |
| POS05321 | 59546.33986 | 55613.16174 | -0.09859 | 0.856408 | 0.9349 | 0.0076  |  | alpha-1,5-L-Arabinotetraose               | -20.970587 | - | - | - | 159.6345 | 547.469617 |
| POS05328 | 378246.7115 | 329382.5768 | -0.19956 | 0.54109  | 0.7628 | 0.08527 |  | Metocurine Iodide                         | -22.267045 | - | - | - | 159.618  | 907.614989 |
| POS05331 | 7250184.013 | 4170809.92  | -0.79769 | 0.034345 | 0.2826 | 1.38692 |  | 2,3,6-Trihydroxypyridine                  | 11.661818  | - | - | - | 159.4625 | 128.106859 |



|          |             |             |          |          |        |         |                                                                                                       |            |   |   |   |          |            |
|----------|-------------|-------------|----------|----------|--------|---------|-------------------------------------------------------------------------------------------------------|------------|---|---|---|----------|------------|
| POS05336 | 5885590.994 | 8307115.461 | 0.49716  | 0.632314 | 0.8181 | 0.72745 | Cytosine                                                                                              | 23.096179  | - | - | - | 159.283  | 112.111843 |
| POS05340 | 217848.1689 | 183890.7718 | -0.24447 | 0.519425 | 0.7502 | 0.07892 | (1,3,4,5-trimethoxy-6-[3,5,7-trihydroxy-2-(2,4,5-trihydroxyphenyl)ethyl]oxy)benzene                   | 15.710163  | - | - | - | 158.9755 | 549.485893 |
| POS05344 | 761214.5115 | 563470.6866 | -0.43396 | 0.189188 | 0.5161 | 0.28107 | Heterophylliin E                                                                                      | -13.027996 | - | - | - | 158.9655 | 909.630739 |
| POS05346 | 55998.80998 | 43260.43829 | -0.37235 | 0.514429 | 0.7469 | 0.05257 | Pradimicinone I                                                                                       | -1.8289009 | - | - | - | 158.959  | 550.488572 |
| POS05348 | 2832222.44  | 2880404.147 | 0.024337 | 0.924726 | 0.9659 | 0.03631 | 3-Sulfofpyruvate                                                                                      | 4.5779559  | - | - | - | 158.947  | 169.133346 |
| POS05355 | 3539143.574 | 3036327.398 | -0.22107 | 0.734053 | 0.8739 | 0.27411 | 6-Imino-5-oxocyclohexa-1,3-dienecarboxylate                                                           | -4.716798  | - | - | - | 158.624  | 152.126064 |
| POS05356 | 6656442.446 | 5996260.724 | -0.15069 | 0.319965 | 0.6276 | 0.5827  | Threote                                                                                               | -24.296656 | - | - | - | 158.6235 | 137.10727  |
| POS05357 | 10966893.89 | 12096535.35 | 0.141439 | 0.711563 | 0.8592 | 0.49064 | N-(4,5-Dihydroxybenzoyl)-L-serine                                                                     | 6.3532298  | - | - | - | 158.614  | 242.206209 |
| POS05359 | 55625.82318 | 60281.07095 | 0.11595  | 0.801296 | 0.9096 | 0.01802 | TG(18:0/22:4(7Z,10Z,13Z,16Z)/0-18:0)                                                                  | 9.6616888  | - | - | - | 158.453  | 926.578219 |
| POS05361 | 740094.5739 | 676448.5583 | -0.12973 | 0.532842 | 0.7588 | 0.10919 | 1,2,1,5,14-trimethoxy-9-oxo-8,17-dioxatetradecalin-7,9,10,11-tetraone                                 | -0.9519292 | - | - | - | 158.2905 | 343.265951 |
| POS05362 | 1283215.484 | 1035213.562 | -0.30984 | 0.128422 | 0.4471 | 0.36063 | Sagerinic acid                                                                                        | 8.0334156  | - | - | - | 158.288  | 721.642766 |
| POS05364 | 169340.1627 | 134712.3581 | -0.33004 | 0.299041 | 0.6119 | 0.11747 | 5,7-dimethoxy-2-(2-hydroxy-2-(4-hydroxy-3-methoxyphenyl)-4-oxo-7-(3-aminopropoxy)sulfonyl)acetic acid | -18.056418 | - | - | - | 158.287  | 735.657011 |
| POS05368 | 1343122.901 | 1431868.845 | 0.092308 | 0.814777 | 0.9158 | 0.11935 | (3-aminopropoxy)sulfonic acid                                                                         | -17.152972 | - | - | - | 158.2785 | 156.174615 |
| POS05369 | 1030640.891 | 1209276.413 | 0.230602 | 0.814986 | 0.9159 | 0.03325 | 5,6-Indolequinone-2-carboxylic acid                                                                   | 9.0566033  | - | - | - | 158.2755 | 192.149308 |
| POS05386 | 4720760.385 | 3336907.146 | -0.50051 | 0.090118 | 0.3896 | 0.85225 | 3-Fluoro-cis,cis-mucote                                                                               | -0.1156489 | - | - | - | 157.9515 | 161.107158 |
| POS05388 | 75581.57904 | 93352.03895 | 0.304647 | 0.544691 | 0.7653 | 0.05709 | TG(18:1(11Z)/22:2(13Z,16Z)/0-18:0)                                                                    | 9.1253813  | - | - | - | 157.948  | 928.593741 |
| POS05390 | 587204.4037 | 467846.7679 | -0.32783 | 0.122554 | 0.4403 | 0.2519  | hydroxyitraconazole                                                                                   | 8.1874971  | - | - | - | 157.9455 | 722.646185 |
| POS05394 | 15131365.29 | 11281975.02 | -0.42352 | 0.083219 | 0.3796 | 1.50961 | Bromobenzene                                                                                          | -18.226427 | - | - | - | 157.787  | 158.012315 |
| POS05410 | 307473.6064 | 288144.9061 | -0.09367 | 0.74943  | 0.8825 | 0.04247 | Casuarictin                                                                                           | 7.2981152  | - | - | - | 157.4675 | 937.659512 |
| POS05412 | 45027.38963 | 34012.16257 | -0.40475 | 0.300066 | 0.6129 | 0.06126 | Proanthocyanidin A2                                                                                   | 7.0292822  | - | - | - | 157.311  | 577.515729 |
| POS05421 | 79178.49132 | 138890.9087 | 0.810772 | 0.39129  | 0.661  | 0.14413 | Manniflavanone                                                                                        | 0.4087422  | - | - | - | 157.287  | 591.495418 |
| POS05422 | 211097.1183 | 331200.9236 | 0.6498   | 0.445276 | 0.7005 | 0.19298 | TG(16:1(9Z)/24:1(15Z)/0-18:0)                                                                         | 9.7237395  | - | - | - | 157.2865 | 930.610316 |
| POS05434 | 894345.372  | 994236.0301 | 0.152756 | 0.761673 | 0.8887 | 0.13306 | TG(16:0/24:1(15Z)/0-18:0)                                                                             | 10.640678  | - | - | - | 156.9595 | 932.62719  |

|          |             |             |          |          |        |         |                                                                                                                       |            |   |   |   |          |            |
|----------|-------------|-------------|----------|----------|--------|---------|-----------------------------------------------------------------------------------------------------------------------|------------|---|---|---|----------|------------|
| POS05435 | 947438.6242 | 987028.7065 | 0.05906  | 0.962053 | 0.9827 | 0.09629 | Potassium iodide                                                                                                      | 15.413803  | - | - | - | 156.9575 | 167.012635 |
| POS05449 | 1506477.903 | 1438951.541 | -0.06616 | 0.833091 | 0.9237 | 0.05491 | TG(16:0/24:0/o-18:0)                                                                                                  | 10.072463  | - | - | - | 156.7995 | 934.642681 |
| POS05450 | 778916.604  | 748990.9601 | -0.05652 | 0.854602 | 0.9339 | 0.02909 | Alnusiin                                                                                                              | 10.098375  | - | - | - | 156.7895 | 935.646215 |
| POS05460 | 168924.7701 | 166270.6805 | -0.02285 | 0.958127 | 0.981  | #####   | Luteoskyrin                                                                                                           | 8.8769833  | - | - | - | 156.618  | 575.500876 |
| POS05468 | 110611.8867 | 117565.1383 | 0.087954 | 0.804984 | 0.9107 | 0.02907 | D-Erythroascorbic acid 1'-<br>a-D-glucoside                                                                           | -14.991904 | - | - | - | 156.605  | 309.241356 |
| POS05470 | 137356.4285 | 104805.4929 | -0.39021 | 0.390493 | 0.6605 | 0.0951  | 4,6-Dichloro-3-methyl-cis-<br>1,2-dihydroxycyclohexa-<br>11,15-dimethoxy-1,7,18-<br>trioxanthene-10,8,9-tri-<br>oxane | -19.791095 | - | - | - | 156.58   | 196.046616 |
| POS05478 | 128200.7586 | 4382.880058 | -4.87038 | 0.334374 | 0.6326 | 0.18333 | 1,2-dimethoxy-6,8,20-<br>trioxanthene-10,8,9-tri-<br>oxane                                                            | 14.057692  | - | - | - | 156.283  | 371.325482 |
| POS05483 | 92243.703   | 123669.2058 | 0.422964 | 0.587469 | 0.7902 | 0.07001 | TG(18:4(6Z,9Z,12Z,15Z)/<br>24:1(15Z)/o-18:0)                                                                          | -14.152339 | - | - | - | 156.2745 | 952.593809 |
| POS05487 | 1262748.642 | 948080.8385 | -0.41349 | 0.127936 | 0.4468 | 0.39792 | 5,4,3-trihydroxy-6-(15-<br>hydroxy-2-<br>hydroxymethyl)-<br>4-Bromo-3,5-<br>cyclohexadiene-1,2-dione                  | -17.178097 | - | - | - | 156.258  | 311.256947 |
| POS05489 | 181497.5244 | 126340.3955 | -0.52263 | 0.063011 | 0.3422 | 0.18987 | 4-Bromo-3,5-<br>cyclohexadiene-1,2-dione                                                                              | -13.382908 | - | - | - | 156.11   | 187.995574 |
| POS05490 | 4347181.638 | 2624798.703 | -0.72787 | 0.161114 | 0.4886 | 0.8894  | Urate radical                                                                                                         | 19.834236  | - | - | - | 156.1085 | 168.112891 |
| POS05493 | 204772.0096 | 255676.9442 | 0.320304 | 0.288337 | 0.603  | 0.12766 | TG(18:1(11Z)/24:1(15Z)/o-<br>18:0)                                                                                    | -14.93286  | - | - | - | 155.951  | 958.640976 |
| POS05496 | 181181.1931 | 222399.833  | 0.295722 | 0.402113 | 0.6697 | 0.10324 | TG(18:2(9Z,12Z)/24:1(15Z)/o-18:0)                                                                                     | -15.372442 | - | - | - | 155.948  | 956.624586 |
| POS05499 | 170586.5759 | 220842.8191 | 0.372516 | 0.492906 | 0.7328 | 0.10229 | TG(18:3(6Z,9Z,12Z)/24:1(15Z)/o-18:0)                                                                                  | -14.812272 | - | - | - | 155.947  | 954.609151 |
| POS05500 | 230338.9466 | 235253.7736 | 0.030459 | 0.919341 | 0.9634 | 0.01164 | TG(18:0/24:1(15Z)/o-18:0)                                                                                             | -15.661885 | - | - | - | 155.947  | 960.656246 |
| POS05505 | 935813.001  | 814081.4698 | -0.20105 | 0.148917 | 0.4745 | 0.24411 | Monomethyl<br>phenylphosphonate                                                                                       | 15.966252  | - | - | - | 155.942  | 173.128325 |
| POS05511 | 451492.2471 | 405861.7388 | -0.15371 | 0.593041 | 0.7922 | 0.1011  | 3,5-Dichloro-2-<br>methylmucote                                                                                       | -4.5407944 | - | - | - | 155.7855 | 226.032355 |
| POS05517 | 318636.2177 | 259625.9086 | -0.29548 | 0.290017 | 0.6044 | 0.14731 | TG(18:0/24:0/o-18:0)                                                                                                  | -15.359129 | - | - | - | 155.616  | 962.672506 |
| POS05519 | 6159110.174 | 6386777.376 | 0.052366 | 0.87504  | 0.9448 | 0.11198 | L-2-Amino-3,4-<br>dihydroxypentanedioic<br>acid                                                                       | 15.31402   | - | - | - | 155.611  | 180.13812  |
| POS05520 | 201021.8925 | 146804.0157 | -0.45346 | 0.227901 | 0.5492 | 0.15002 | Cyanophos                                                                                                             | -1.0370994 | - | - | - | 155.605  | 244.226424 |
| POS05522 | 3628116.654 | 2714173.839 | -0.41871 | 0.368834 | 0.6479 | 0.50162 | N-Dimethyl-2-<br>aminoethylphosphote                                                                                  | -9.7952731 | - | - | - | 155.4625 | 154.122477 |
| POS05529 | 2712875.402 | 2363150.78  | -0.19911 | 0.212532 | 0.5357 | 0.38119 | [5-(Aminomethyl)furan-3-<br>yl]methyl phosphate                                                                       | 21.83979   | - | - | - | 155.282  | 208.1329   |
| POS05537 | 201106.3107 | 207824.91   | 0.04741  | 0.789191 | 0.9032 | 0.03937 | 5,4,3-trihydroxy-6-(15-<br>hydroxy-12,12-dimethyl-<br>6-oxo-4-phenyl-3,11,14-                                         | 10.376438  | - | - | - | 155.26   | 529.47876  |

|          |             |             |          |          |        |         |                                                                           |            |   |   |   |          |            |
|----------|-------------|-------------|----------|----------|--------|---------|---------------------------------------------------------------------------|------------|---|---|---|----------|------------|
| POS05539 | 653110.8069 | 647940.3397 | -0.01147 | 0.937584 | 0.9719 | 0.00497 | 4-U-(beta-L-Arabinofuranosyl-(1-<math>\beta</math>-D-ribofuranosyl)uracil | -10.165815 | - | - | - | 155.2555 | 528.475614 |
| POS05540 | 149323.8666 | 67925.49492 | -1.13642 | 0.063731 | 0.3438 | 0.20558 | Vinclozolin                                                               | 8.358673   | - | - | - | 155.248  | 287.120468 |
| POS05542 | 322684.9    | 226018.5739 | -0.51368 | 0.40782  | 0.673  | 0.1434  | 3,4-Dihydroxy-L-phenylalanine                                             | 5.085546   | - | - | - | 154.949  | 198.196179 |
| POS05548 | 212963.0928 | 123042.6961 | -0.79144 | 0.017349 | 0.2275 | 0.25557 | 4-Chloromethandienone                                                     | -23.684354 | - | - | - | 154.77   | 335.879345 |
| POS05556 | 2533104.153 | 1900902.99  | -0.41422 | 0.204541 | 0.5283 | 0.51349 | N-Acetyl-L-aspartate                                                      | -19.94128  | - | - | - | 154.28   | 176.143184 |
| POS05562 | 710944.207  | 517571.7673 | -0.45798 | 0.0372   | 0.2891 | 0.36328 | Bromoxynil                                                                | 4.1157978  | - | - | - | 154.25   | 277.921216 |
| POS05578 | 36121282.09 | 34644353.17 | -0.06023 | 0.734904 | 0.8744 | 0.15725 | Trimethylselenonium                                                       | -0.1421474 | - | - | - | 152.944  | 125.070859 |
| POS05581 | 917370.9603 | 859852.811  | -0.09342 | 0.858042 | 0.9353 | 0.05122 | Vicianose                                                                 | -16.737501 | - | - | - | 152.9225 | 313.27255  |
| POS05586 | 348837.2397 | 286914.1656 | -0.28193 | 0.015584 | 0.2226 | 0.21094 | 3'-Hydroxydiclofenac                                                      | -6.1702723 | - | - | - | 152.871  | 313.153351 |
| POS05588 | 1288484.48  | 1060183.438 | -0.28136 | 0.65823  | 0.8318 | 0.16248 | Aminosalicilate sodium anhydrous                                          | 10.112082  | - | - | - | 152.723  | 176.126247 |
| POS05603 | 96647.10964 | 90646.08587 | -0.09248 | 0.650968 | 0.829  | 0.03136 | Bowdichione                                                               | 9.3457206  | - | - | - | 150.919  | 299.257064 |
| POS05611 | 751098.993  | 959303.4845 | 0.352984 | 0.286664 | 0.6021 | 0.26172 | Quinoxaline                                                               | 16.878558  | - | - | - | 150.596  | 131.156073 |
| POS05613 | 987948.8835 | 956520.1481 | -0.04664 | 0.810519 | 0.9135 | 0.04068 | Melizame                                                                  | -7.2967562 | - | - | - | 150.569  | 179.154077 |
| POS05618 | 702572.6916 | 507328.3819 | -0.46973 | 0.070075 | 0.3569 | 0.33554 | Lamotrigine                                                               | 1.5061229  | - | - | - | 150.234  | 257.098662 |
| POS05619 | 4388865.239 | 2367578.812 | -0.89044 | 0.044238 | 0.3084 | 1.23647 | Pterin                                                                    | -4.8806751 | - | - | - | 150.222  | 164.14328  |
| POS05621 | 108061.3869 | 88882.19696 | -0.28188 | 0.199645 | 0.5255 | 0.08548 | Spirolaurenone                                                            | -5.0261199 | - | - | - | 150.0405 | 300.252273 |
| POS05622 | 185382.0738 | 128067.7891 | -0.53359 | 0.065948 | 0.3485 | 0.17991 | Scopoletin                                                                | 11.795427  | - | - | - | 149.925  | 193.177643 |
| POS05625 | 917517.1385 | 818293.1761 | -0.16512 | 0.766839 | 0.8917 | 0.11554 | sn-Glycero-3-phosphoethanolamine                                          | 2.0543269  | - | - | - | 149.8665 | 216.149219 |
| POS05633 | 137668.4817 | 130885.3539 | -0.07289 | 0.778962 | 0.8985 | 0.01036 | Pyrifenox                                                                 | 12.450806  | - | - | - | 149.133  | 296.174852 |
| POS05635 | 140616.2482 | 147723.7915 | 0.071139 | 0.742139 | 0.8785 | 0.02274 | Nocardicin E                                                              | 14.024381  | - | - | - | 148.884  | 400.367077 |
| POS05636 | 58530.38517 | 39803.67388 | -0.55628 | 0.199035 | 0.525  | 0.09589 | Dinocton 6                                                                | 12.56724   | - | - | - | 148.873  | 355.36683  |
| POS05638 | 742793.4716 | 666438.0267 | -0.15649 | 0.048542 | 0.3158 | 0.216   | 5,6-Dihydrothymine                                                        | 15.482424  | - | - | - | 148.8375 | 129.13846  |
| POS05651 | 245840.6243 | 271146.797  | 0.141351 | 0.724341 | 0.8677 | 0.06638 | Metamitron                                                                | -1.719331  | - | - | - | 147.533  | 203.219529 |

|          |             |             |          |          |        |         |                                                          |            |   |   |   |          |            |
|----------|-------------|-------------|----------|----------|--------|---------|----------------------------------------------------------|------------|---|---|---|----------|------------|
| POS05656 | 2464148.639 | 2081331.207 | -0.24358 | 0.488676 | 0.73   | 0.27705 | Allantoate                                               | 2.6390687  | - | - | - | 147.192  | 177.138441 |
| POS05663 | 380246.8309 | 308355.9462 | -0.30234 | 0.607103 | 0.8029 | 0.10895 | Pyrimidodiazepine                                        | -9.1944834 | - | - | - | 146.8    | 222.221143 |
| POS05674 | 185285.9104 | 149806.9751 | -0.30665 | 0.367271 | 0.6468 | 0.09374 | 3,5-Dinitrosalicylic acid                                | -7.4276624 | - | - | - | 146.207  | 229.121482 |
| POS05675 | 329937.1254 | 121156.7058 | -1.44532 | 0.315299 | 0.6246 | 0.2524  | 6-Acetamido-3-oxohexanoate                               | 1.2740679  | - | - | - | 146.206  | 188.200615 |
| POS05676 | 138848.0068 | 119109.872  | -0.22121 | 0.527168 | 0.7557 | 0.07063 | M1                                                       | 11.297345  | - | - | - | 146.199  | 305.136712 |
| POS05678 | 214820.9206 | 180059.7615 | -0.25466 | 0.213527 | 0.5364 | 0.11796 | Selenodiglutathione                                      | -10.379585 | - | - | - | 146.195  | 692.591198 |
| POS05679 | 296944.7112 | 345089.3337 | 0.216776 | 0.513435 | 0.7463 | 0.08703 | 3-Phospho-D-glycerate                                    | -10.219837 | - | - | - | 146.1605 | 187.062575 |
| POS05683 | 290373.0606 | 237726.7227 | -0.2886  | 0.521619 | 0.7515 | 0.09546 | NTP                                                      | -8.8128912 | - | - | - | 146.1345 | 389.100656 |
| POS05686 | 283324.3281 | 214207.8761 | -0.40344 | 0.03953  | 0.296  | 0.21318 | Dimethylenetriurea                                       | 1.4220198  | - | - | - | 146.1125 | 205.194767 |
| POS05689 | 764606.1291 | 1082953.214 | 0.502182 | 0.425933 | 0.6859 | 0.22108 | erythro-3-Hydroxy-Ls-aspartate                           | 20.151432  | - | - | - | 146.069  | 150.112381 |
| POS05693 | 1632427.935 | 1337543.096 | -0.28743 | 0.235671 | 0.5559 | 0.32297 | 3-hydroxy-2-isobutyrate                                  | 14.997505  | - | - | - | 145.8695 | 104.106823 |
| POS05696 | 1081940.358 | 551409.8514 | -0.97242 | 0.304178 | 0.6167 | 0.48159 | Calcium propiote                                         | -9.6499651 | - | - | - | 145.849  | 187.22468  |
| POS05699 | 83990.07828 | 73714.51556 | -0.18827 | 0.495318 | 0.7341 | 0.06129 | Triphenyl phosphate                                      | -7.029944  | - | - | - | 145.65   | 327.288083 |
| POS05705 | 116648.9056 | 76568.42549 | -0.60735 | 0.026275 | 0.2576 | 0.16484 | Bisnorbadioquinone A                                     | 9.7080529  | - | - | - | 145.2795 | 651.511892 |
| POS05709 | 125847.9098 | 99512.38991 | -0.33873 | 0.124389 | 0.4427 | 0.11857 | Norbadione A                                             | -13.251692 | - | - | - | 145.1435 | 679.506685 |
| POS05718 | 1754439.227 | 1171256.984 | -0.58295 | 0.008338 | 0.1881 | 0.68205 | 3-Dehydroquite                                           | -21.14247  | - | - | - | 144.84   | 191.153956 |
| POS05722 | 711772.5469 | 765890.1262 | 0.105721 | 0.730679 | 0.8715 | 0.04054 | Piperazine phosphate                                     | 2.8914279  | - | - | - | 144.502  | 203.153961 |
| POS05724 | 423964.0391 | 287357.6857 | -0.56109 | 0.265474 | 0.5818 | 0.21131 | Lathyrine                                                | -9.9424532 | - | - | - | 144.437  | 183.185365 |
| POS05729 | 220114.2862 | 186476.4779 | -0.23926 | 0.177592 | 0.5035 | 0.13372 | Vitisin A                                                | -18.0472   | - | - | - | 143.8285 | 562.465444 |
| POS05737 | 170302.1899 | 196111.05   | 0.203574 | 0.738213 | 0.8761 | 0.03952 | o-(3-hydroxy-2-methoxy-4-(sulfooxy)phenyl]propionic acid | -17.954086 | - | - | - | 143.467  | 291.242066 |
| POS05742 | 181194.3867 | 191554.5584 | 0.080217 | 0.625132 | 0.8134 | 0.04338 | Domoic acid                                              | -4.6247792 | - | - | - | 143.1525 | 312.336137 |
| POS05743 | 136398.3412 | 142394.4577 | 0.062067 | 0.621389 | 0.8122 | 0.03637 | Dichlofluanid                                            | -3.7762346 | - | - | - | 143.147  | 334.236218 |
| POS05749 | 6045172.651 | 4822675.917 | -0.32595 | 0.23491  | 0.5558 | 0.63992 | 2,3,6-Trihydroxypyridine                                 | 11.725598  | - | - | - | 142.804  | 128.106867 |

|          |             |             |          |          |        |         |                                                                                                                                  |            |   |   |   |          |            |
|----------|-------------|-------------|----------|----------|--------|---------|----------------------------------------------------------------------------------------------------------------------------------|------------|---|---|---|----------|------------|
| POS05750 | 112148.1461 | 112623.7159 | 0.006105 | 0.971171 | 0.9872 | 0.00371 | Agrocin 84                                                                                                                       | -0.2454643 | - | - | - | 142.803  | 703.506504 |
| POS05755 | 84286.29058 | 79698.23888 | -0.08075 | 0.766084 | 0.8916 | 0.02073 | Wyerone                                                                                                                          | 20.206167  | - | - | - | 142.4095 | 259.281795 |
| POS05757 | 74884.41812 | 95385.36992 | 0.349102 | 0.431223 | 0.6899 | 0.08722 | Famphur                                                                                                                          | 9.0985582  | - | - | - | 142.3375 | 326.351737 |
| POS05760 | 216093.512  | 145142.6784 | -0.57418 | 0.089882 | 0.3895 | 0.19011 | L-Arginine phosphate                                                                                                             | -13.278427 | - | - | - | 142.148  | 255.184801 |
| POS05761 | 1010736.471 | 789182.503  | -0.35698 | 0.027242 | 0.2602 | 0.38781 | Formothion                                                                                                                       | 14.380137  | - | - | - | 142.1465 | 258.278476 |
| POS05764 | 217397.9502 | 207055.1518 | -0.07032 | 0.709777 | 0.8583 | 0.0516  | 1,2,6-triacetoxy-4-(1,5-hydroxy-6-(3,4,5-trimethoxy-2-(5-hydroxy-11,17,18-trimethoxy-13,15,18-N(omega)-(ADP-D-ribose)-L-arginine | -20.156205 | - | - | - | 142.1345 | 717.522834 |
| POS05765 | 101276.4983 | 91118.86791 | -0.15248 | 0.416602 | 0.6793 | 0.06026 | hydroxy-11,17,18-trimethoxy-13,15,18-N(omega)-(ADP-D-ribose)-L-arginine                                                          | 24.159795  | - | - | - | 142.132  | 577.484204 |
| POS05766 | 604947.2604 | 545173.6164 | -0.15009 | 0.311892 | 0.6219 | 0.16863 | N(omega)-(ADP-D-ribose)-L-arginine                                                                                               | 15.686595  | - | - | - | 142.0905 | 716.5199   |
| POS05769 | 228996.7032 | 185306.3554 | -0.30541 | 0.28863  | 0.603  | 0.13392 | Ditalimfos                                                                                                                       | -3.7575154 | - | - | - | 141.753  | 300.288752 |
| POS05770 | 1006307.557 | 796400.896  | -0.3375  | 0.084312 | 0.3821 | 0.34344 | Theophylline                                                                                                                     | -8.9911783 | - | - | - | 141.694  | 181.169657 |
| POS05775 | 21527.13141 | 59563.87005 | 1.468281 | 0.321793 | 0.629  | 0.13013 | Triaziquone                                                                                                                      | -16.326578 | - | - | - | 141.451  | 232.254001 |
| POS05776 | 1114379.347 | 1479329.169 | 0.408703 | 0.561997 | 0.776  | 0.33959 | Asulam                                                                                                                           | 10.250443  | - | - | - | 141.44   | 231.250637 |
| POS05778 | 8518658.232 | 11225897.08 | 0.398133 | 0.567773 | 0.7785 | 0.91813 | N-Hydroxy-MeIQx                                                                                                                  | 9.6035192  | - | - | - | 141.371  | 230.247378 |
| POS05783 | 93902.0682  | 196303.1423 | 1.063854 | 0.462275 | 0.7127 | 0.15657 | DHAP(10:0)                                                                                                                       | 17.486698  | - | - | - | 141.113  | 325.320148 |
| POS05787 | 529468.2711 | 409770.7519 | -0.36973 | 0.093252 | 0.396  | 0.28125 | 5-Hydroxysulfamethoxazole                                                                                                        | -22.097512 | - | - | - | 141.0685 | 270.278326 |
| POS05789 | 56109.28751 | 48188.72445 | -0.21954 | 0.265503 | 0.5818 | 0.06497 | Manniflavanone                                                                                                                   | 7.1701618  | - | - | - | 140.7895 | 591.49941  |
| POS05790 | 136821.7282 | 148099.758  | 0.114272 | 0.673407 | 0.8391 | 0.03051 | fluvoxamino acid                                                                                                                 | 11.388119  | - | - | - | 140.778  | 319.302501 |
| POS05792 | 1088336.645 | 1064672.136 | -0.03172 | 0.838749 | 0.9266 | 0.06708 | Lettowianthine                                                                                                                   | -9.4110223 | - | - | - | 140.767  | 318.299191 |
| POS05793 | 531053.4818 | 354777.3367 | -0.58194 | 0.200048 | 0.5255 | 0.27848 | sn-Glycerol 3-phosphate                                                                                                          | -1.2883282 | - | - | - | 140.75   | 173.080755 |
| POS05795 | 691422.8906 | 614414.5968 | -0.17036 | 0.130179 | 0.4485 | 0.19683 | 2,7-Anhydro-alpha-N-acetylneuraminic acid                                                                                        | 2.1044147  | - | - | - | 140.663  | 292.26249  |
| POS05801 | 374405.3337 | 412370.8931 | 0.139342 | 0.38865  | 0.6595 | 0.11359 | N-Acetoxy-4-aminobiphenyl                                                                                                        | 10.008953  | - | - | - | 140.4045 | 228.268051 |
| POS05812 | 363831.669  | 321298.105  | -0.17936 | 0.053148 | 0.3235 | 0.16475 | Glutaminyhistidine                                                                                                               | -5.0333887 | - | - | - | 139.7675 | 284.293851 |
| POS05815 | 592244.5444 | 767093.8309 | 0.37321  | 0.128782 | 0.4471 | 0.27825 | L-(alpha-carboxy-beta-(methylammonio)propyl)-L-histidine                                                                         | -23.486727 | - | - | - | 139.756  | 272.293905 |

|          |             |             |          |          |        |         |                                                                         |            |   |   |   |          |            |
|----------|-------------|-------------|----------|----------|--------|---------|-------------------------------------------------------------------------|------------|---|---|---|----------|------------|
| POS05825 | 187045.2614 | 155534.5202 | -0.26615 | 0.153335 | 0.4811 | 0.11808 | Reduced coenzyme F420                                                   | -8.4456432 | - | - | - | 139.082  | 776.609226 |
| POS05827 | 133061.6184 | 70294.62483 | -0.92061 | 0.354376 | 0.6384 | 0.15413 | (2-benzyl-3-oxopropoxy)sulfonic acid                                    | -4.3730042 | - | - | - | 139.029  | 245.266208 |
| POS05828 | 1245776.489 | 746173.222  | -0.73946 | 0.2136   | 0.5364 | 0.48666 | Prolyl-Gamma-glutamate                                                  | -16.858745 | - | - | - | 138.9855 | 244.262876 |
| POS05830 | 876527.3863 | 724711.9378 | -0.27439 | 0.037334 | 0.2898 | 0.31633 | Coenzyme F420                                                           | -2.3952772 | - | - | - | 138.7545 | 774.598024 |
| POS05835 | 239057.6283 | 235805.8267 | -0.01976 | 0.955422 | 0.9803 | 0.0091  | Pencozole                                                               | 12.770548  | - | - | - | 138.393  | 285.195206 |
| POS05837 | 514251.2497 | 406672.2879 | -0.33861 | 0.021871 | 0.2452 | 0.27684 | Luteoin /-O-[beta-D-glucuronosyl-(1-&gt;2)-beta-D-glucopyranoside] 4' O | 20.477095  | - | - | - | 138.3755 | 815.632657 |
| POS05840 | 63216.58621 | 58114.87931 | -0.1214  | 0.448888 | 0.7031 | 0.03284 | Clofentezine                                                            | -23.496673 | - | - | - | 138.055  | 304.146254 |
| POS05843 | 561166.3287 | 761349.2254 | 0.44013  | 0.154218 | 0.4823 | 0.27112 | Letrozole                                                               | -1.6554753 | - | - | - | 138.047  | 286.309504 |
| POS05845 | 135466.3577 | 121901.0037 | -0.15222 | 0.719256 | 0.8647 | 0.04019 | {(4E)-5-(4-methoxyphenyl)-3-oxopent-4-en-1                              | 19.590074  | - | - | - | 137.815  | 287.312885 |
| POS05852 | 374828.2703 | 283284.8096 | -0.40398 | 0.000297 | 0.0721 | 0.29234 | Theogallinin                                                            | -21.285374 | - | - | - | 137.702  | 801.616935 |
| POS05853 | 1415055.066 | 1247537.634 | -0.18177 | 0.094456 | 0.3979 | 0.29981 | Phosfolan                                                               | -11.044724 | - | - | - | 137.699  | 256.299157 |
| POS05854 | 284753.9552 | 253294.8981 | -0.1689  | 0.406114 | 0.6721 | 0.10266 | Longifolonine                                                           | -10.499012 | - | - | - | 137.6875 | 298.309455 |
| POS05856 | 73521.70203 | 44947.47436 | -0.70993 | 0.280553 | 0.5965 | 0.12088 | Phloretin                                                               | 2.3253621  | - | - | - | 137.614  | 275.276614 |
| POS05860 | 168198.9706 | 128560.0045 | -0.38773 | 0.216847 | 0.5382 | 0.13784 | Tyrosyl-Glutamate                                                       | 24.0902    | - | - | - | 137.381  | 310.309328 |
| POS05861 | 634568.2648 | 481243.3096 | -0.39901 | 0.022293 | 0.246  | 0.32468 | 5-Sulfoxymethylfurfural                                                 | 24.102152  | - | - | - | 137.3755 | 207.185246 |
| POS05862 | 274141.5554 | 289072.1354 | 0.076509 | 0.590948 | 0.7918 | 0.03565 | 2,3,9,10-Tetrahydroxyberbine                                            | -11.375975 | - | - | - | 137.372  | 300.325072 |
| POS05864 | 412398.1704 | 125308.7693 | -1.71855 | 0.046158 | 0.3134 | 0.4479  | N(beta)-Epoxy succinoyl-DAP                                             | 15.054764  | - | - | - | 137.357  | 218.189846 |
| POS05870 | 1043770.504 | 874770.0172 | -0.25483 | 0.023114 | 0.2478 | 0.34476 | 2',5',6'-tris-O-(5,4,2-trihydroxybenzoyl)-3'-O-benzoyl 2',4',6'         | -7.6607346 | - | - | - | 137.03   | 787.601351 |
| POS05873 | 144777.5714 | 116775.3215 | -0.3101  | 0.085569 | 0.3848 | 0.13656 | Avenanthramide C                                                        | -4.0112387 | - | - | - | 136.7235 | 316.283512 |
| POS05874 | 153960.0145 | 126949.3057 | -0.2783  | 0.01538  | 0.2226 | 0.13875 | Xenognosin A                                                            | -4.4596204 | - | - | - | 136.604  | 257.302534 |
| POS05880 | 74422.9836  | 64735.81983 | -0.20118 | 0.414829 | 0.6784 | 0.04745 | 5-Hydroxy-1-(4-sulfophenyl)-4-[(E)-(4-sulfophenyl)diazenyl] 1H          | 15.866316  | - | - | - | 136.0245 | 469.432709 |
| POS05885 | 700862.7635 | 425080.4145 | -0.7214  | 0.189363 | 0.5161 | 0.34214 | 1-Carboxyvinyl carboxyphosphate                                         | 24.411825  | - | - | - | 135.998  | 197.064163 |
| POS05891 | 96812.72198 | 110440.6688 | 0.190003 | 0.780709 | 0.8992 | 0.0313  | Cyanotriphenylborate                                                    | -16.321397 | - | - | - | 135.66   | 292.132425 |

|          |             |             |          |          |        |         |                                                                |            |   |   |   |          |            |
|----------|-------------|-------------|----------|----------|--------|---------|----------------------------------------------------------------|------------|---|---|---|----------|------------|
| POS05893 | 65961.72989 | 57985.55904 | -0.18594 | 0.698057 | 0.8513 | 0.03969 | 1,2-Bis(4-hydroxy-3-methoxyphenyl)ethylene                     | -21.334843 | - | - | - | 135.636  | 273.297267 |
| POS05897 | 130856.813  | 187051.282  | 0.515445 | 0.205021 | 0.5287 | 0.16487 | Sulfamethoxazole                                               | -5.4828221 | - | - | - | 135.549  | 254.283488 |
| POS05901 | 205828.8591 | 232277.0204 | 0.174401 | 0.745934 | 0.8803 | 0.01969 | 5'-Methylthioadenosine                                         | 17.036067  | - | - | - | 134.7525 | 298.345842 |
| POS05904 | 241445.9939 | 138116.7882 | -0.80581 | 0.109922 | 0.4215 | 0.23745 | Fluometuron                                                    | -4.1333143 | - | - | - | 134.634  | 233.208717 |
| POS05905 | 627773.1111 | 517098.6738 | -0.2798  | 0.015154 | 0.2226 | 0.28034 | N-Acetyl-L-2-amino-6-oxopimelate                               | -19.12183  | - | - | - | 134.5995 | 232.205456 |
| POS05910 | 76533.45174 | 99881.47601 | 0.384127 | 0.241466 | 0.5615 | 0.08873 | Chicoric acid                                                  | 4.0645376  | - | - | - | 133.652  | 475.380305 |
| POS05913 | 61963.32287 | 59892.2888  | -0.04904 | 0.713388 | 0.8606 | 0.02285 | Rhododendrin                                                   | -16.155142 | - | - | - | 133.466  | 329.359572 |
| POS05914 | 35569.88353 | 53514.37996 | 0.58927  | 0.399759 | 0.6679 | 0.07538 | Indol-3-ylacetyl-myoinositol L-arabinoside                     | -3.0177859 | - | - | - | 133.458  | 470.44506  |
| POS05916 | 221661.81   | 221089.8909 | -0.00373 | 0.986555 | 0.9932 | 0.00387 | 2-Hydroxy-6-oxono-2,4-diene-1,9-dioate                         | -20.425571 | - | - | - | 133.377  | 215.175002 |
| POS05917 | 442274.797  | 426136.3326 | -0.05363 | 0.655596 | 0.8306 | 0.04692 | Protodeoxyviolaceinic acid                                     | 5.4248979  | - | - | - | 133.356  | 342.371828 |
| POS05921 | 533532.2612 | 489497.291  | -0.12427 | 0.794411 | 0.9055 | 0.08734 | 1-phthaleneacetic acid sodium salt                             | 24.751366  | - | - | - | 132.941  | 209.20083  |
| POS05922 | 738549.2315 | 445704.455  | -0.72861 | 0.001023 | 0.0749 | 0.52342 | Calcium L-aspartate                                            | -15.928154 | - | - | - | 132.9395 | 172.16935  |
| POS05923 | 619389.577  | 511470.8184 | -0.2762  | 0.577594 | 0.7844 | 0.15573 | Albendazole-beta-hydroxysulphone                               | 11.823362  | - | - | - | 132.9185 | 314.340581 |
| POS05924 | 75154.94988 | 132517.1068 | 0.818239 | 0.307821 | 0.619  | 0.10776 | dTDP-4-amino-2,3,4,6-tetraoxy-D-glucose                        | -4.6048418 | - | - | - | 132.459  | 516.350904 |
| POS05925 | 2278844.339 | 1930471.537 | -0.23935 | 0.038231 | 0.2927 | 0.47952 | [5-(Aminomethyl)furan-3-yl]methyl phosphate                    | 21.894545  | - | - | - | 132.431  | 208.132911 |
| POS05926 | 119500.1906 | 111819.0589 | -0.09585 | 0.691938 | 0.8473 | 0.0426  | 2-(3,4-dimethoxy-5-methoxyphenyl)-3,5,7-trihydroxy-1,8-dioxane | 1.748573   | - | - | - | 131.9195 | 318.278031 |
| POS05929 | 204200.5589 | 201666.3193 | -0.01802 | 0.908045 | 0.9578 | 0.01329 | Taxiphyllin                                                    | -19.330071 | - | - | - | 131.566  | 312.288559 |
| POS05931 | 168930.4643 | 179044.6519 | 0.08389  | 0.642053 | 0.824  | 0.03264 | Buntanine                                                      | -12.432298 | - | - | - | 131.3935 | 356.387258 |
| POS05933 | 236032.779  | 371178.8125 | 0.653127 | 0.127482 | 0.4463 | 0.25488 | N(omega)-Nitro-L-arginine                                      | -1.226755  | - | - | - | 131.073  | 220.205508 |
| POS05936 | 833096.0078 | 606664.1703 | -0.45758 | 0.294144 | 0.6083 | 0.26339 | Zonisamide                                                     | -4.2266714 | - | - | - | 130.7075 | 213.23208  |
| POS05937 | 152704.9652 | 148757.3461 | -0.03779 | 0.883231 | 0.9474 | 0.02208 | 5-Carboxy-2-oxohept-3-enedioate                                | 8.8643847  | - | - | - | 130.545  | 217.154093 |
| POS05938 | 98505.90833 | 77971.62489 | -0.33726 | 0.362477 | 0.6443 | 0.0753  | Dapdiamide B                                                   | -2.6632598 | - | - | - | 130.5435 | 315.344039 |
| POS05939 | 204052.9073 | 159530.9557 | -0.35511 | 0.242668 | 0.5618 | 0.15127 | 1-(1-methylnitrosoamino)-4-(3-pyridinyl)-1,4-butanediol        | 3.1257633  | - | - | - | 130.541  | 226.252381 |

|          |             |             |          |          |        |         |                                        |            |   |   |   |          |            |
|----------|-------------|-------------|----------|----------|--------|---------|----------------------------------------|------------|---|---|---|----------|------------|
| POS05940 | 44050.68131 | 33372.75499 | -0.40049 | 0.190719 | 0.5176 | 0.05826 | dTDP-4-dehydro-beta-L-rhamnose         | 14.610532  | - | - | - | 130.178  | 547.328959 |
| POS05950 | 983456.6554 | 1098113.141 | 0.159093 | 0.68454  | 0.845  | 0.19091 | Selenomethionine sesquioxide           | 22.507166  | - | - | - | 129.2    | 213.122051 |
| POS05951 | 3788270.046 | 2667697.817 | -0.50594 | 0.034123 | 0.2814 | 0.83578 | Phosphocreatine                        | -12.093165 | - | - | - | 129.181  | 212.117824 |
| POS05952 | 404352.1924 | 314999.8944 | -0.36026 | 0.085311 | 0.3847 | 0.21148 | D-Glucosamine                          | -21.957267 | - | - | - | 129.1765 | 180.174442 |
| POS05953 | 850896.4209 | 732291.7721 | -0.21656 | 0.046045 | 0.3134 | 0.28048 | Fraxetin                               | -11.134959 | - | - | - | 129.174  | 209.172459 |
| POS05967 | 140422.418  | 126816.7202 | -0.14703 | 0.662525 | 0.8336 | 0.05337 | 5'-Deoxy-5-fluorocytidine              | 24.637713  | - | - | - | 128.5475 | 246.221018 |
| POS05968 | 2529499.774 | 1911316.258 | -0.40429 | 0.14238  | 0.4668 | 0.56173 | Lichenin                               | 0.0233036  | - | - | - | 128.503  | 163.14788  |
| POS05972 | 730163.2153 | 412890.7576 | -0.82246 | 0.19002  | 0.5169 | 0.36003 | Flurochloridone                        | 7.9398721  | - | - | - | 128.338  | 313.124855 |
| POS05974 | 963875.8527 | 907443.9217 | -0.08704 | 0.585544 | 0.789  | 0.11696 | Morphinone                             | 4.1329466  | - | - | - | 128.166  | 284.330248 |
| POS05976 | 11787155.07 | 10667139.73 | -0.14404 | 0.295383 | 0.6091 | 0.64902 | Cyazine                                | 19.651585  | - | - | - | 128.1635 | 241.704707 |
| POS05977 | 706558.9526 | 416464.3027 | -0.76262 | 0.162321 | 0.4895 | 0.35796 | Lormetazepam                           | 24.263503  | - | - | - | 128.161  | 336.200409 |
| POS05981 | 2092855.561 | 1748407.242 | -0.25943 | 0.035531 | 0.2845 | 0.49279 | 3-Fluoro-cis,cis-mucote                | -0.1443548 | - | - | - | 127.8115 | 161.107153 |
| POS05984 | 4319886.417 | 4064621.373 | -0.08787 | 0.518911 | 0.7498 | 0.1813  | 2,3,6-Trihydroxypyridine               | 11.653615  | - | - | - | 127.306  | 128.106858 |
| POS05986 | 97601.87795 | 71563.05966 | -0.44769 | 0.012569 | 0.2092 | 0.13357 | Furaneol 4-(6-malonylglucoside)        | -14.046339 | - | - | - | 126.782  | 377.314691 |
| POS05987 | 2257240.77  | 1774680.202 | -0.347   | 0.278212 | 0.5939 | 0.40452 | Citalopram alcohol                     | 12.658043  | - | - | - | 126.781  | 312.361318 |
| POS05989 | 276579.8317 | 187659.9792 | -0.55957 | 0.061957 | 0.3409 | 0.21988 | Neosaxitoxin                           | 17.771679  | - | - | - | 126.436  | 316.29878  |
| POS05992 | 545492.1722 | 368768.2224 | -0.56484 | 0.093846 | 0.397  | 0.31407 | Flumazenil                             | 10.294373  | - | - | - | 126.021  | 304.298799 |
| POS05994 | 76524.56434 | 45684.73869 | -0.74421 | 0.256502 | 0.5745 | 0.10825 | beta-Cotonefuran                       | 1.2948462  | - | - | - | 125.781  | 305.302271 |
| POS06003 | 1899583.201 | 1276074.453 | -0.57397 | 0.447527 | 0.7021 | 0.3852  | 3-carboxy-2,3-dihydroxypropanoate      | -13.593249 | - | - | - | 124.7495 | 150.08425  |
| POS06004 | 12286314.37 | 10028547.74 | -0.29294 | 0.599848 | 0.7973 | 0.55249 | Cytosine                               | 23.314814  | - | - | - | 124.731  | 112.111867 |
| POS06007 | 3052561.638 | 2530545.432 | -0.27057 | 0.192779 | 0.519  | 0.45869 | Oxalosuccite                           | 14.298919  | - | - | - | 124.27   | 191.117595 |
| POS06008 | 168421.9864 | 128975.5749 | -0.38498 | 0.010187 | 0.1952 | 0.182   | Maculosine                             | 8.0316024  | - | - | - | 124.235  | 332.329938 |
| POS06009 | 6924058.955 | 4661723.217 | -0.57075 | 0.096041 | 0.4006 | 1.00598 | cis-4-Carboxymethylenebut-2-en-1-olide | 8.7865487  | - | - | - | 124.076  | 141.102108 |



|          |             |             |          |          |        |         |                                                                                               |            |   |   |   |          |            |
|----------|-------------|-------------|----------|----------|--------|---------|-----------------------------------------------------------------------------------------------|------------|---|---|---|----------|------------|
| POS06013 | 32804.43506 | 10870.6971  | -1.59345 | 0.411455 | 0.6762 | 0.07474 | 4,4-Bis[4-(acetyloxy)phenyl]3-hexanone                                                        | -9.2304089 | - | - | - | 123.7595 | 369.426876 |
| POS06014 | 638135.6771 | 477115.5482 | -0.41952 | 0.059268 | 0.3362 | 0.31316 | Diphenylcarbazine                                                                             | 12.888615  | - | - | - | 123.725  | 243.286899 |
| POS06019 | 51694.96138 | 25977.99969 | -0.99273 | 0.242134 | 0.5616 | 0.09989 | Quinoline-3-carboxamides                                                                      | 1.097959   | - | - | - | 123.056  | 360.360871 |
| POS06026 | 149168.4528 | 121287.2143 | -0.29851 | 0.350509 | 0.6364 | 0.10345 | 2,3,4,7,8,9,10,11,12,13,14-decahydroxy-14-(hydroxymethyl)(2-benzyl-3-oxopropoxy)sulfonic acid | 15.707268  | - | - | - | 122.717  | 757.55316  |
| POS06027 | 190929.2184 | 84583.32015 | -1.17459 | 0.27546  | 0.5921 | 0.21557 | Prolyl-Gamma-glutamate                                                                        | -4.4148089 | - | - | - | 122.374  | 245.266198 |
| POS06028 | 1664704.441 | 868065.182  | -0.93939 | 0.213631 | 0.5364 | 0.62337 | 2-Aminomucote                                                                                 | -16.901523 | - | - | - | 122.373  | 244.262865 |
| POS06035 | 2549241.089 | 1248142.001 | -1.03029 | 0.102488 | 0.4087 | 0.78707 | Melicopine                                                                                    | -6.0696801 | - | - | - | 122.041  | 158.130423 |
| POS06041 | 535498.0142 | 382858.627  | -0.48407 | 0.027418 | 0.2606 | 0.34712 | Thifensulfuron-methyl                                                                         | -24.803774 | - | - | - | 121.9305 | 314.304205 |
| POS06044 | 70152.70726 | 30851.99315 | -1.18514 | 0.20421  | 0.5278 | 0.12307 | Glutaminyhistidine                                                                            | -17.119611 | - | - | - | 121.848  | 388.392145 |
| POS06049 | 501043.4793 | 494363.8526 | -0.01936 | 0.963256 | 0.983  | 0.03878 | Ditalimfos                                                                                    | -4.8909166 | - | - | - | 121.5305 | 284.293891 |
| POS06051 | 109421.8081 | 103703.4492 | -0.07744 | 0.629459 | 0.8159 | 0.03385 | Serylglutamic acid                                                                            | -4.0179793 | - | - | - | 121.365  | 300.288674 |
| POS06052 | 7117771.716 | 8017275.153 | 0.171686 | 0.874513 | 0.9445 | 0.05084 | Cyanophos                                                                                     | -0.2456511 | - | - | - | 121.351  | 234.205819 |
| POS06053 | 144873.6087 | 126325.605  | -0.19765 | 0.470397 | 0.7182 | 0.07151 | (R)-(Homo)3-citrate                                                                           | -0.9651085 | - | - | - | 121.3485 | 244.226442 |
| POS06055 | 884207.2318 | 954438.086  | 0.110267 | 0.911067 | 0.9581 | 0.00696 | 6-Succinoaminopurine                                                                          | -5.9564066 | - | - | - | 121.343  | 235.209182 |
| POS06058 | 1283033.631 | 1083079.383 | -0.24442 | 0.503499 | 0.7398 | 0.19103 | Urothion                                                                                      | 19.952147  | - | - | - | 121.001  | 236.211469 |
| POS06066 | 74851.69007 | 68026.63314 | -0.13794 | 0.594577 | 0.7936 | 0.03723 | Phosfolan                                                                                     | 8.0144572  | - | - | - | 119.9935 | 326.376884 |
| POS06067 | 1344190.914 | 1101118.828 | -0.28777 | 0.060857 | 0.3392 | 0.36359 | 2-(5-Carboxy-5-(methylammonio)propyl)-1,2-Bis(4-hydroxy-3-methoxyphenyl)ethylene              | -11.173509 | - | - | - | 119.717  | 256.299124 |
| POS06068 | 579238.1855 | 289022.0801 | -1.00298 | 0.143338 | 0.4679 | 0.39858 | Samaderin A                                                                                   | -23.388511 | - | - | - | 119.6625 | 272.293931 |
| POS06069 | 38961.10397 | 17861.70583 | -1.12516 | 0.373324 | 0.6502 | 0.08914 | Betagarin                                                                                     | -21.317634 | - | - | - | 119.6115 | 273.297272 |
| POS06072 | 160747.2035 | 162139.7161 | 0.012444 | 0.967023 | 0.9849 | 0.00745 | Violacein                                                                                     | -1.0856511 | - | - | - | 118.632  | 331.338818 |
| POS06073 | 54132.02653 | 62274.63228 | 0.202162 | 0.588184 | 0.7904 | 0.03612 | 5-Nitrofurfural                                                                               | -0.2879632 | - | - | - | 118.607  | 329.323182 |
| POS06086 | 952711.909  | 934328.7827 | -0.02811 | 0.907573 | 0.9575 | 0.03078 |                                                                                               | 24.065445  | - | - | - | 117.213  | 344.351039 |
| POS06088 | 4152646.987 | 3489452.492 | -0.25103 | 0.298157 | 0.6115 | 0.45431 |                                                                                               | -19.147011 | - | - | - | 116.594  | 142.086175 |

|          |             |             |          |          |        |         |                                                           |            |   |   |   |          |            |
|----------|-------------|-------------|----------|----------|--------|---------|-----------------------------------------------------------|------------|---|---|---|----------|------------|
| POS06089 | 161069.5185 | 280635.0794 | 0.801012 | 0.210128 | 0.5338 | 0.21881 | Pelargonidin                                              | 19.997139  | - | - | - | 116.2695 | 272.257501 |
| POS06094 | 124237.1432 | 134806.4573 | 0.117793 | 0.597689 | 0.7957 | 0.04495 | Miraxanthin-I                                             | -11.877601 | - | - | - | 115.904  | 359.36992  |
| POS06095 | 901984.5988 | 768133.9431 | -0.23174 | 0.037853 | 0.2906 | 0.29927 | Deoxyviolaceinic acid                                     | -7.8494222 | - | - | - | 115.8995 | 358.366572 |
| POS06098 | 385931.3433 | 267527.7084 | -0.52866 | 0.007199 | 0.1779 | 0.31208 | Formothion                                                | 14.058384  | - | - | - | 115.399  | 258.278393 |
| POS06100 | 222982.6745 | 227781.1783 | 0.030717 | 0.900722 | 0.9541 | 0.00912 | 6-Hydroxyprotopine                                        | -23.811014 | - | - | - | 115.25   | 370.366482 |
| POS06105 | 1740125.205 | 1406766.882 | -0.30681 | 0.682322 | 0.8437 | 0.22288 | Maleimide                                                 | -1.6760015 | - | - | - | 115.0365 | 98.0792139 |
| POS06111 | 420900.5107 | 356407.6682 | -0.23995 | 0.399615 | 0.6679 | 0.12135 | Citalopram alcohol                                        | 12.542171  | - | - | - | 114.54   | 312.361282 |
| POS06112 | 44912.94269 | 54502.50566 | 0.279191 | 0.567332 | 0.7784 | 0.05026 | MK826                                                     | 6.1018925  | - | - | - | 114.536  | 494.563488 |
| POS06113 | 23407.83855 | 1503295.771 | 6.004993 | 0.342282 | 0.6327 | 0.53067 | ATP                                                       | -17.598771 | - | - | - | 114.473  | 508.179351 |
| POS06118 | 109581.1055 | 123930.9558 | 0.177538 | 0.361565 | 0.6438 | 0.06471 | Clavamycin F                                              | 12.080977  | - | - | - | 114.065  | 373.385475 |
| POS06120 | 725956.8221 | 700355.6632 | -0.0518  | 0.562642 | 0.776  | 0.08085 | N-Methyl-14-O-demethylepiporphyroxine I-                  | -23.876332 | - | - | - | 113.886  | 372.382209 |
| POS06121 | 61214.70342 | 75396.38767 | 0.300617 | 0.537093 | 0.7602 | 0.05854 | Oleoylglycerophosphoserine                                | 12.466102  | - | - | - | 113.8605 | 522.594979 |
| POS06122 | 6406371.407 | 3679376.873 | -0.80005 | 0.208311 | 0.5321 | 1.2124  | Cyazine                                                   | 19.535972  | - | - | - | 113.859  | 241.704679 |
| POS06127 | 2287442.052 | 2116362.63  | -0.11215 | 0.738658 | 0.8763 | 0.14279 | [5-(Aminomethyl)furan-3-yl]methyl phosphate               | 21.525377  | - | - | - | 113.533  | 208.132835 |
| POS06130 | 160803.9705 | 152072.5374 | -0.08054 | 0.702807 | 0.8544 | 0.03936 | Silbin                                                    | -23.368821 | - | - | - | 113.173  | 426.428735 |
| POS06134 | 681622.7103 | 551640.2018 | -0.30525 | 0.052091 | 0.3217 | 0.27781 | γ-Carboxymethoxymethylguanine                             | -1.1635949 | - | - | - | 112.182  | 240.195198 |
| POS06138 | 2378530.865 | 1769267.388 | -0.42692 | 0.102587 | 0.4087 | 0.51018 | 3-Fluoro-cis,cis-mucote                                   | -0.3340245 | - | - | - | 111.472  | 161.107123 |
| POS06139 | 174541.4477 | 152767.3317 | -0.19223 | 0.51191  | 0.7453 | 0.08065 | Oolongtheanin                                             | -9.3630353 | - | - | - | 110.962  | 733.597717 |
| POS06152 | 1064613.097 | 1059575.013 | -0.00684 | 0.947197 | 0.9764 | 0.01143 | Anthocyanin 3'-O-beta-D-glucoside                         | 8.4063776  | - | - | - | 110.108  | 386.397716 |
| POS06153 | 270942.7136 | 235451.5556 | -0.20256 | 0.228875 | 0.5501 | 0.12455 | epigallocatechin-(4beta->8)-epicatechin-3-O-gallate ester | -23.26515  | - | - | - | 110.104  | 747.613806 |
| POS06156 | 123350.8152 | 94361.42733 | -0.3865  | 0.126933 | 0.4452 | 0.11276 | Prodelphinidin A2 3'-gallate                              | 17.999358  | - | - | - | 109.766  | 761.628367 |
| POS06161 | 624825.5412 | 197609.876  | -1.6608  | 0.440843 | 0.6978 | 0.32773 | Rabeprazole sodium                                        | 19.447722  | - | - | - | 109.057  | 382.439194 |
| POS06165 | 84136.66505 | 71086.52121 | -0.24316 | 0.126335 | 0.445  | 0.08059 | Ceftizoxime                                               | 21.784171  | - | - | - | 108.404  | 384.418429 |

|          |             |             |          |          |        |         |                                                                      |            |   |   |   |          |            |
|----------|-------------|-------------|----------|----------|--------|---------|----------------------------------------------------------------------|------------|---|---|---|----------|------------|
| POS06168 | 825416.2294 | 1075314.742 | 0.381565 | 0.311114 | 0.6218 | 0.26034 | 2-Pyrone-4,6-dicarboxylate                                           | -18.032625 | - | - | - | 108.072  | 185.107057 |
| POS06171 | 5002940.879 | 2950009.436 | -0.76206 | 0.112232 | 0.4244 | 0.99277 | 2-Amino-5-phosphopentanoic acid                                      | 5.9489749  | - | - | - | 107.7225 | 198.134649 |
| POS06173 | 541043.4937 | 176788.3941 | -1.61372 | 0.013983 | 0.2172 | 0.49802 | 3,4-Dihydroxyphthalate                                               | 5.6814845  | - | - | - | 107.7175 | 199.138002 |
| POS06174 | 3509223.173 | 2772954.972 | -0.33973 | 0.255033 | 0.5727 | 0.58824 | Methyl 2-propenyl selenide                                           | -12.143245 | - | - | - | 107.717  | 136.075636 |
| POS06177 | 105529.8942 | 82785.6579  | -0.3502  | 0.286841 | 0.6022 | 0.08188 | Quercetin 3-O-beta-D-glucosyl-(1-&gt;2)-beta-D-glucosyl (1-&gt;2)    | -6.7180885 | - | - | - | 107.1    | 789.659478 |
| POS06179 | 2219566.581 | 2139632.757 | -0.05291 | 0.643215 | 0.8247 | 0.08754 | 3-Oxalomalate                                                        | -8.9750468 | - | - | - | 107.051  | 207.112427 |
| POS06180 | 1889735.567 | 1653907.13  | -0.19231 | 0.091839 | 0.393  | 0.34736 | Citrate                                                              | 13.123615  | - | - | - | 107.037  | 193.133298 |
| POS06182 | 377839.2169 | 287921.3837 | -0.3921  | 0.008748 | 0.1905 | 0.25756 | {(0-[L-(3-[10-carboxy-3,4,5-trihydroxyoxan-2-yl)oxyl 4-hydroxyphenyl | -6.6591685 | - | - | - | 107.033  | 788.657031 |
| POS06185 | 37323817.21 | 29282300.82 | -0.35007 | 0.226824 | 0.5477 | 1.86095 | Trimethylseleniumium                                                 | -0.4403269 | - | - | - | 106.687  | 125.070822 |
| POS06189 | 455127.3748 | 474332.2126 | 0.059627 | 0.715014 | 0.8614 | 0.0525  | N-Pyruvoyl-5-methoxy-3-hydroxyanthranilate                           | -18.254983 | - | - | - | 106.015  | 254.210754 |
| POS06191 | 611152.9363 | 306254.641  | -0.9968  | 0.275576 | 0.5922 | 0.36993 | Sevoflurane                                                          | 17.035642  | - | - | - | 105.84   | 201.065485 |
| POS06193 | 21629122.28 | 19586639.44 | -0.14311 | 0.794147 | 0.9053 | 0.55818 | Calcium hydroxide                                                    | -4.2637086 | - | - | - | 105.674  | 75.0996607 |
| POS06194 | 328213.8654 | 212588.5851 | -0.62657 | 0.015394 | 0.2226 | 0.27699 | Delphinidin 3-lathyroside 5-(6-acetylglucoside)                      | -13.570297 | - | - | - | 105.6675 | 802.672498 |
| POS06196 | 284755.1185 | 264810.3741 | -0.10476 | 0.676979 | 0.8402 | 0.04164 | L-(Formamido)-N1-(5-phosphoribosyl)acetamidi                         | 3.9987847  | - | - | - | 105.194  | 314.210229 |
| POS06197 | 2810181.708 | 2331888.767 | -0.26916 | 0.814631 | 0.9158 | 0.20675 | Oxolinic acid                                                        | -1.7165804 | - | - | - | 105.18   | 262.236928 |
| POS06203 | 1200418.692 | 927690.0594 | -0.37182 | 0.030392 | 0.2685 | 0.40676 | L-pyruoxy-3-[4-(sulfooxy)phenyl]propanoi                             | 12.059595  | - | - | - | 104.6725 | 263.240439 |
| POS06204 | 295685.1114 | 291745.9087 | -0.01935 | 0.906484 | 0.9569 | 0.00524 | 4,8-dihydroxy-2H-furo[2,3-h]chromen-2-one                            | 11.600057  | - | - | - | 104.662  | 219.173807 |
| POS06207 | 7481271.204 | 5856588.248 | -0.35322 | 0.35071  | 0.6364 | 0.68289 | 2,3,6-Trihydroxypyridine                                             | 11.485509  | - | - | - | 104.641  | 128.106836 |
| POS06210 | 1048603.053 | 782289.2704 | -0.42269 | 0.086519 | 0.3863 | 0.37795 | Oxalosuccite                                                         | 14.063589  | - | - | - | 103.982  | 191.11755  |
| POS06214 | 781132.8576 | 709245.4855 | -0.13928 | 0.225208 | 0.5468 | 0.15778 | L-pyruoxy-3-[4-(sulfooxy)phenyl]propanoi                             | -23.253353 | - | - | - | 103.6335 | 279.230807 |
| POS06216 | 4680107.671 | 4411045.896 | -0.08542 | 0.734269 | 0.874  | 0.12942 | N-Dimethyl-2-aminoethylphosphote                                     | -9.9326465 | - | - | - | 102.2974 | 154.122456 |
| POS06220 | 762362.8987 | 538228.4391 | -0.50226 | 0.430244 | 0.6889 | 0.26696 | Meconic acid                                                         | 9.5806122  | - | - | - | 102.2645 | 201.111694 |
| POS06224 | 1598733.052 | 1191128.233 | -0.4246  | 0.446423 | 0.7014 | 0.33935 | GMP                                                                  | 10.163657  | - | - | - | 102.236  | 364.231568 |

|          |             |             |          |          |        |         |                                                                                                  |            |   |   |   |          |            |
|----------|-------------|-------------|----------|----------|--------|---------|--------------------------------------------------------------------------------------------------|------------|---|---|---|----------|------------|
| POS06227 | 2354745.568 | 1541474.985 | -0.61126 | 0.272765 | 0.5901 | 0.56847 | 3-Deoxy-D-manno-<br>octulosote 8-phosphate                                                       | -16.611685 | - | - | - | 102.046  | 319.173891 |
| POS06228 | 696585.6507 | 538833.5802 | -0.37046 | 0.545165 | 0.7658 | 0.19369 | Lormetazepam                                                                                     | 24.281987  | - | - | - | 101.978  | 336.200416 |
| POS06233 | 1088905.836 | 10463.29193 | -6.7014  | 0.343283 | 0.6329 | 0.57126 | 4,4-Di[4-<br>(acetyloxy)phenyl]3-<br>[[2E]-2-phenyl-3-<br>phenylprop-2-en-1-<br>yl]sulfonic acid | -9.0166804 | - | - | - | 100.963  | 369.426955 |
| POS06240 | 92025.31522 | 18996.2536  | -2.27632 | 0.238856 | 0.5588 | 0.18308 | Oxidized Renilla luciferin                                                                       | 18.020203  | - | - | - | 99.8853  | 229.27139  |
| POS06248 | 75805.78579 | 193399.4996 | 1.351204 | 0.537903 | 0.7608 | 0.10706 | S-(1,2-Dichlorovinyl)-L-<br>cysteine                                                             | -13.944558 | - | - | - | 98.6859  | 396.454862 |
| POS06253 | 2707764.198 | 2311223.442 | -0.22845 | 0.061248 | 0.3403 | 0.46282 | CGH 2466                                                                                         | 17.846396  | - | - | - | 97.569   | 217.096733 |
| POS06259 | 243048.474  | 259895.6386 | 0.096688 | 0.766729 | 0.8917 | 0.03883 | Maleimide                                                                                        | 2.6263646  | - | - | - | 95.4598  | 323.220523 |
| POS06260 | 5728081.464 | 5096894.573 | -0.16843 | 0.555331 | 0.7717 | 0.26033 | Olsalazine                                                                                       | -1.6670766 | - | - | - | 95.4471  | 98.0792148 |
| POS06263 | 319351.4368 | 244909.8528 | -0.38289 | 0.209067 | 0.5326 | 0.1821  | Protocatecholphlorogluci<br>caldobayolate                                                        | 18.405067  | - | - | - | 95.0929  | 303.251839 |
| POS06271 | 407732.9394 | 414325.2742 | 0.023139 | 0.952825 | 0.9795 | 0.00116 | L-<br>dTDP-3-amino-3,4,6-<br>trideoxy-D-glucose                                                  | -19.595982 | - | - | - | 94.7352  | 307.225676 |
| POS06277 | 302184.1917 | 300207.555  | -0.00947 | 0.984637 | 0.9923 | 0.01061 | Phosfolan                                                                                        | -12.815605 | - | - | - | 94.0749  | 532.345867 |
| POS06279 | 1749167.288 | 1491305.785 | -0.23009 | 0.495207 | 0.7341 | 0.24269 | Methylselenomethionine                                                                           | -11.160734 | - | - | - | 93.88705 | 256.299127 |
| POS06280 | 457700.6753 | 248012.1901 | -0.88399 | 0.06166  | 0.3409 | 0.34651 | Riluzole                                                                                         | 10.453753  | - | - | - | 93.7181  | 212.150384 |
| POS06282 | 483938.2842 | 448110.7401 | -0.11097 | 0.705646 | 0.8562 | 0.0652  | cis-(Homo)3-aconitate                                                                            | -2.3352381 | - | - | - | 93.3764  | 235.20503  |
| POS06283 | 94859.94727 | 106985.2906 | 0.173541 | 0.709899 | 0.8584 | 0.04584 | D-Erythroascorbic acid 1'-<br>a-D-glucoside                                                      | -3.190615  | - | - | - | 93.2197  | 217.194587 |
| POS06289 | 164080.4499 | 184435.2353 | 0.168711 | 0.717922 | 0.8638 | 0.07263 | cis-3,4-Leucopelargonidin                                                                        | -14.89795  | - | - | - | 92.702   | 309.241384 |
| POS06290 | 298244.7456 | 182991.022  | -0.70472 | 0.701757 | 0.8538 | 0.11113 | Xenogonin A                                                                                      | -13.895954 | - | - | - | 92.5352  | 291.271343 |
| POS06291 | 201529.413  | 171049.5341 | -0.23658 | 0.350894 | 0.6364 | 0.10298 | 5,4,3-trihydroxy-0-[[3-<br>hydroxy-2-<br>(hydroxymethyl)-2                                       | -4.5519607 | - | - | - | 92.4923  | 257.30251  |
| POS06299 | 464971.1564 | 405687.0114 | -0.19677 | 0.622925 | 0.8124 | 0.09931 | Formothion                                                                                       | -17.176741 | - | - | - | 91.51175 | 311.256947 |
| POS06307 | 267293.8735 | 139376.6231 | -0.93944 | 0.32396  | 0.6305 | 0.22759 | dTDP-4-oxo-2,3,6-<br>trideoxy-D-glucose                                                          | 14.072163  | - | - | - | 90.3141  | 258.278397 |
| POS06308 | 321157.8254 | 288128.0672 | -0.15657 | 0.81606  | 0.9163 | 0.04109 | Vicianose                                                                                        | -9.729636  | - | - | - | 90.29425 | 515.317173 |
| POS06311 | 796484.6575 | 865640.134  | 0.120121 | 0.822513 | 0.9184 | 0.08624 | Thelephoric acid                                                                                 | -16.725099 | - | - | - | 89.96755 | 313.272554 |
| POS06312 | 99593.38124 | 165998.2551 | 0.737046 | 0.334884 | 0.6326 | 0.15567 |                                                                                                  | 24.671723  | - | - | - | 89.9574  | 353.267267 |

|          |             |             |          |          |        |         |                                                              |            |   |   |   |          |            |
|----------|-------------|-------------|----------|----------|--------|---------|--------------------------------------------------------------|------------|---|---|---|----------|------------|
| POS06316 | 137300.4655 | 106540.3104 | -0.36594 | 0.144546 | 0.4686 | 0.13322 | Ditalimfos                                                   | -4.0618567 | - | - | - | 89.2843  | 300.288661 |
| POS06317 | 78773.4887  | 135335.6365 | 0.78076  | 0.483762 | 0.7265 | 0.12751 | N'-Hydroxyneosaxitoxin                                       | -18.851104 | - | - | - | 89.03    | 332.286332 |
| POS06319 | 320810.5604 | 267434.6722 | -0.26254 | 0.260821 | 0.5788 | 0.11742 | 5'-Methylthioadenosine                                       | 17.023277  | - | - | - | 88.94095 | 298.345838 |
| POS06329 | 248694.7653 | 265846.4131 | 0.096217 | 0.735434 | 0.8745 | 0.04264 | Prusin                                                       | -4.5944579 | - | - | - | 87.20955 | 296.29382  |
| POS06330 | 223063.395  | 200996.1633 | -0.15029 | 0.594911 | 0.7937 | 0.06883 | Melicopine                                                   | -24.973975 | - | - | - | 86.88685 | 314.304152 |
| POS06332 | 563825.6245 | 506786.9747 | -0.15387 | 0.688203 | 0.8461 | 0.12052 | N-Methyl-N'-nitro-N-nitrosoguanidine                         | -22.002949 | - | - | - | 86.5516  | 148.09684  |
| POS06337 | 344040.036  | 314102.016  | -0.13134 | 0.147944 | 0.4735 | 0.10908 | Psicofuranine                                                | -4.9155953 | - | - | - | 85.5163  | 298.273115 |
| POS06338 | 469946.1127 | 374658.2149 | -0.32692 | 0.588127 | 0.7904 | 0.1372  | GMP                                                          | 10.392407  | - | - | - | 85.4694  | 364.231651 |
| POS06341 | 145576.098  | 126864.3258 | -0.19849 | 0.806977 | 0.9118 | 0.06344 | C.I. Pigment Blue 63                                         | -2.9795561 | - | - | - | 84.5086  | 450.376938 |
| POS06345 | 246445.9498 | 151991.285  | -0.69728 | 0.243919 | 0.5622 | 0.183   | (Z)-But-1-ene-1,2,4-tricarboxylate                           | -0.9327733 | - | - | - | 83.98145 | 189.141901 |
| POS06347 | 127486.0824 | 118549.3301 | -0.10485 | 0.774842 | 0.8961 | 0.0318  | Dephospho-CoA                                                | 10.45039   | - | - | - | 83.6368  | 688.568662 |
| POS06348 | 695546.7935 | 588521.8705 | -0.24105 | 0.590918 | 0.7918 | 0.14339 | 3-Deoxy-D-manno-octulosote 8-phosphate                       | -16.327835 | - | - | - | 83.50745 | 319.173982 |
| POS06357 | 136856.8282 | 111006.1849 | -0.30203 | 0.138668 | 0.4616 | 0.1104  | Myxochelin C                                                 | -15.82188  | - | - | - | 82.18605 | 540.53264  |
| POS06359 | 244556.9024 | 222407.793  | -0.13696 | 0.31721  | 0.6257 | 0.07437 | Bluensidine 6-phosphate                                      | 20.206594  | - | - | - | 81.7103  | 345.229932 |
| POS06360 | 291970.735  | 249697.5549 | -0.22564 | 0.610441 | 0.8056 | 0.07647 | Δ,Δ-Dioxotetrahydropyrimidin a D-ribonucleotide              | -14.788501 | - | - | - | 81.6851  | 327.199653 |
| POS06362 | 107298.2624 | 143004.1949 | 0.414431 | 0.622358 | 0.8124 | 0.09847 | Aurothioglucose                                              | 4.7820493  | - | - | - | 81.58175 | 393.189252 |
| POS06365 | 631298.7676 | 340389.6978 | -0.89114 | 0.138521 | 0.4615 | 0.40408 | 4-Hydroxylamino-2,6-dinitrotoluene                           | -2.1111323 | - | - | - | 81.4138  | 214.154427 |
| POS06367 | 270322.8591 | 260784.7964 | -0.05182 | 0.854304 | 0.9337 | 0.01049 | Longifolonine                                                | -10.58719  | - | - | - | 81.3774  | 298.309429 |
| POS06370 | 149476.7943 | 119657.8474 | -0.32101 | 0.308862 | 0.62   | 0.09418 | Lycoricidine                                                 | -2.4393153 | - | - | - | 80.9943  | 292.262666 |
| POS06373 | 338996.8192 | 261579.4252 | -0.37402 | 0.025296 | 0.2562 | 0.23258 | Depniumin 3-O-(o-malonyl)-beta-glucoside-2'-O-beta-glucoside | 8.8644991  | - | - | - | 80.5171  | 714.584602 |
| POS06378 | 30480925.43 | 24848796.59 | -0.29473 | 0.274436 | 0.5919 | 1.3907  | Trimethylseleniumium                                         | -0.2840471 | - | - | - | 79.59395 | 125.070841 |
| POS06381 | 858539.3977 | 461725.792  | -0.89485 | 0.002543 | 0.1099 | 0.59689 | 5,6-Dihydro-5-fluorouracil                                   | 5.3109024  | - | - | - | 79.4121  | 133.101078 |
| POS06386 | 237588.9093 | 185356.7117 | -0.35816 | 0.141382 | 0.4651 | 0.16518 | Isonoeaflavin 3-O-gallate                                    | -2.8121647 | - | - | - | 78.95635 | 717.603161 |

|          |             |             |          |          |        |         |                                                                                                                                  |            |   |   |   |          |            |
|----------|-------------|-------------|----------|----------|--------|---------|----------------------------------------------------------------------------------------------------------------------------------|------------|---|---|---|----------|------------|
| POS06392 | 41898081.34 | 25178547.01 | -0.73469 | 0.009051 | 0.1917 | 3.56369 | Calcium hydroxide                                                                                                                | -4.2452026 | - | - | - | 78.5446  | 75.0996621 |
| POS06405 | 293180.6355 | 207899.8728 | -0.4959  | 0.011724 | 0.2033 | 0.25589 | ent-epicatechin-(4a1pna-<br>&gt;8)-ent-epicatechin 3'-<br>ollate                                                                 | -17.926872 | - | - | - | 77.5076  | 731.618679 |
| POS06407 | 217167.3374 | 78473.316   | -1.46853 | 0.002943 | 0.117  | 0.34346 | Capensinidin                                                                                                                     | -1.2863839 | - | - | - | 77.325   | 346.330232 |
| POS06408 | 304489.0978 | 151632.5038 | -1.00581 | 0.389437 | 0.66   | 0.18904 | D-<br>Hydroxymethyldeoxycytid<br>olate                                                                                           | 2.396229   | - | - | - | 77.3042  | 338.231185 |
| POS06412 | 993172.4311 | 1021716.344 | 0.040879 | 0.925604 | 0.9662 | 0.0144  | Oxolinic acid                                                                                                                    | -1.8449547 | - | - | - | 77.13525 | 262.236895 |
| POS06416 | 533541.7342 | 382169.9341 | -0.48139 | 0.025028 | 0.2549 | 0.31597 | malvian 5-(p-<br>malonylglucoside) 5-<br>olucoside                                                                               | -20.720225 | - | - | - | 76.74555 | 742.61611  |
| POS06419 | 551054.9403 | 244341.3604 | -1.1733  | 0.211624 | 0.5346 | 0.3796  | Alginic acid                                                                                                                     | -21.0401   | - | - | - | 76.6145  | 419.225977 |
| POS06431 | 5197270.564 | 5396641.376 | 0.054308 | 0.771383 | 0.8941 | 0.12227 | 2,3,6-Trihydroxypyridine                                                                                                         | 11.550727  | - | - | - | 74.9895  | 128.106845 |
| POS06432 | 144942.6856 | 127783.1503 | -0.18178 | 0.775168 | 0.8962 | 0.06649 | Lancerin                                                                                                                         | 16.711038  | - | - | - | 74.9545  | 407.354267 |
| POS06434 | 512079.9465 | 365930.914  | -0.4848  | 0.003993 | 0.136  | 0.34332 | Cyanidin 5-O-(p-<br>glucosyl-2"-<br>olucoside)                                                                                   | -21.463092 | - | - | - | 74.9177  | 744.631416 |
| POS06444 | 115612.3145 | 96639.41809 | -0.25861 | 0.338972 | 0.6326 | 0.06827 | Vicine                                                                                                                           | 6.8243216  | - | - | - | 74.2648  | 305.265953 |
| POS06447 | 1291016.085 | 1639371.572 | 0.344636 | 0.742995 | 0.8788 | 0.05772 | gamma-L-Glutamyl-D-<br>alanine                                                                                                   | -0.6908464 | - | - | - | 74.233   | 219.214326 |
| POS06450 | 1137253.537 | 923451.0177 | -0.30045 | 0.478722 | 0.7225 | 0.20769 | 2-Amino-1,2-bis(p-<br>chlorophenyl)ethanol                                                                                       | 5.7961227  | - | - | - | 74.2248  | 283.174012 |
| POS06455 | 313046.3759 | 238679.575  | -0.3913  | 0.112708 | 0.4252 | 0.22027 | N2-Acetyl-L-aminoadipyl-<br>delta-phosphate                                                                                      | -9.1304843 | - | - | - | 73.883   | 284.177091 |
| POS06459 | 8924679.974 | 15831740.47 | 0.826948 | 0.467249 | 0.7158 | 1.0282  | Alanyl-Glutamic acid                                                                                                             | 20.851211  | - | - | - | 73.4378  | 218.211005 |
| POS06472 | 356840.4763 | 265678.4315 | -0.4256  | 0.276673 | 0.5932 | 0.16572 | Fluo-3                                                                                                                           | -1.4639172 | - | - | - | 72.15115 | 770.54115  |
| POS06480 | 5400986.331 | 3960212.379 | -0.44765 | 0.082336 | 0.3788 | 0.89423 | N-Dimethyl-2-<br>aminoethylphosphate                                                                                             | -9.8216268 | - | - | - | 71.1527  | 154.122473 |
| POS06491 | 707811.3804 | 667012.448  | -0.08565 | 0.820174 | 0.9178 | 0.03689 | 3-Oxopropionyl-CoA                                                                                                               | -24.193856 | - | - | - | 70.1134  | 838.567912 |
| POS06492 | 450828.2062 | 236127.2118 | -0.93301 | 0.175402 | 0.5016 | 0.29198 | L-Selenomethionine                                                                                                               | 2.525737   | - | - | - | 69.60995 | 197.114072 |
| POS06495 | 290606.8625 | 192251.8823 | -0.59607 | 0.03769  | 0.2904 | 0.25173 | (p-carboxy-3,4,5-<br>trihydroxyoxan-2-yl)({4-<br>[11 hydroxy 7 (4 hydroxy<br>D-erythro-1-(imidazol-4-<br>yl)glycerol 3-phosphate | -16.181447 | - | - | - | 69.0795  | 786.677563 |
| POS06502 | 4388816.253 | 2816596.647 | -0.63988 | 0.253381 | 0.572  | 0.75088 | 4,4'-Diaminostilbene<br>dihydrochloride                                                                                          | 24.666644  | - | - | - | 68.05535 | 239.148251 |
| POS06506 | 383836.4547 | 228861.2021 | -0.74602 | 0.135827 | 0.458  | 0.2507  | 4,4'-Diaminostilbene<br>dihydrochloride                                                                                          | 8.8028141  | - | - | - | 67.8469  | 284.20597  |
| POS06511 | 34361.82015 | 39279.76273 | 0.19298  | 0.657378 | 0.8316 | 0.02761 | {2-[3,5-diamyuroxy-4-<br>(sulfooxy)phenyl]-3-<br>hydroxy 5-oxo 5H                                                                | -20.891629 | - | - | - | 67.3098  | 384.299269 |

|          |             |             |          |          |        |         |                                                   |            |   |   |   |          |            |
|----------|-------------|-------------|----------|----------|--------|---------|---------------------------------------------------|------------|---|---|---|----------|------------|
| POS06512 | 21620899.5  | 17158422.39 | -0.33351 | 0.35521  | 0.6391 | 1.2058  | Cyanidin                                          | 3.2797008  | - | - | - | 67.19735 | 288.252419 |
| POS06514 | 258824.1825 | 174931.4491 | -0.56518 | 0.116666 | 0.4319 | 0.23074 | Letrozole                                         | -1.6267739 | - | - | - | 67.17105 | 286.309512 |
| POS06516 | 3750777.632 | 3983452.547 | 0.08683  | 0.595948 | 0.7946 | 0.15082 | Methyl 2-propenyl selenide                        | -12.193912 | - | - | - | 67.01395 | 136.07563  |
| POS06520 | 20932.95969 | 3800.637153 | -2.46146 | 0.386884 | 0.6585 | 0.07961 | (1Z)-2-methyl-3-phenylprop-2-en-1-ylsulfonic acid | 18.143556  | - | - | - | 66.50295 | 229.271418 |
| POS06521 | 425067.857  | 193729.11   | -1.13365 | 0.112447 | 0.4247 | 0.36245 | N-Acetoxy-4-aminobiphenyl                         | 9.9398484  | - | - | - | 66.4656  | 228.268036 |
| POS06527 | 118366.8764 | 173986.5518 | 0.55571  | 0.317286 | 0.6257 | 0.15317 | IAA-94                                            | 18.503026  | - | - | - | 66.1155  | 358.242286 |
| POS06529 | 683191.8267 | 870790.8712 | 0.350036 | 0.436393 | 0.6941 | 0.20001 | Bis(4-nitrophenyl)phosphate                       | -14.034524 | - | - | - | 65.648   | 341.184702 |
| POS06532 | 6293485.741 | 6715083.934 | 0.093546 | 0.914451 | 0.9601 | 0.04341 | Debromohymenialdisine                             | -9.9120936 | - | - | - | 65.30435 | 246.242146 |
| POS06541 | 1945625.374 | 1794072.914 | -0.117   | 0.85808  | 0.9353 | 0.09365 | Quinolite                                         | -19.316176 | - | - | - | 64.257   | 168.122949 |
| POS06546 | 4391394.393 | 2091108.988 | -1.07041 | 0.006612 | 0.1696 | 1.32603 | 2,4-Dinitroaniline                                | 22.383967  | - | - | - | 63.9161  | 184.132976 |
| POS06547 | 20157748.05 | 17044374.2  | -0.24204 | 0.081139 | 0.3777 | 1.29187 | Trans-urocanate                                   | 10.153952  | - | - | - | 63.9161  | 138.127669 |
| POS06548 | 1717844.568 | 1267248.587 | -0.4389  | 0.014016 | 0.2172 | 0.57143 | sn-Glycerol 3-phosphate                           | -16.11988  | - | - | - | 63.6947  | 173.078203 |
| POS06550 | 275773.7109 | 221411.8961 | -0.31675 | 0.076895 | 0.3704 | 0.17206 | PMEG                                              | 9.3325538  | - | - | - | 63.2525  | 290.195075 |
| POS06554 | 20111.48484 | 56855.32457 | 1.499276 | 0.006051 | 0.1639 | 0.16951 | Prunin 4",6"-di-O-gallate                         | 19.662333  | - | - | - | 63.07365 | 739.623699 |
| POS06555 | 116507.9918 | 82825.0877  | -0.49229 | 0.031729 | 0.2743 | 0.15563 | Xenogonin A                                       | -4.0995117 | - | - | - | 63.0262  | 257.302626 |
| POS06557 | 1501499.608 | 1129270.477 | -0.41101 | 0.072855 | 0.3626 | 0.50897 | Antirrhinocide                                    | -22.313856 | - | - | - | 62.89765 | 363.328392 |
| POS06558 | 128705.6694 | 105552.8808 | -0.28611 | 0.449919 | 0.704  | 0.09248 | 7,8-Didemethyl-8-hydroxy-5-deazariboflavin        | 5.0662927  | - | - | - | 62.8968  | 364.331217 |
| POS06559 | 484486.5281 | 456544.8645 | -0.0857  | 0.521403 | 0.7515 | 0.09318 | Violacein                                         | 24.09244   | - | - | - | 62.8902  | 344.351048 |
| POS06563 | 1231874.388 | 1328728.956 | 0.109192 | 0.762141 | 0.889  | 0.07862 | Dehydroascorbide(1-)                              | 22.910757  | - | - | - | 62.8547  | 174.112242 |
| POS06573 | 30939.29128 | 39257.26358 | 0.343519 | 0.7585   | 0.8874 | 0.02898 | Proacacipetalin                                   | -20.9961   | - | - | - | 61.9271  | 260.257633 |
| POS06574 | 6141981.415 | 4613051.801 | -0.41298 | 0.091781 | 0.393  | 1.00273 | fluvoxamino acid                                  | 11.593407  | - | - | - | 61.8675  | 319.302567 |
| POS06576 | 35215115.99 | 26362235.8  | -0.41772 | 0.074622 | 0.3661 | 2.46436 | Lettowianthine                                    | -9.1013355 | - | - | - | 61.85835 | 318.299289 |
| POS06584 | 156339.384  | 140123.0719 | -0.15799 | 0.623194 | 0.8125 | 0.05155 | Frutinone A                                       | -17.951793 | - | - | - | 61.2264  | 265.234833 |

|          |             |             |          |          |        |         |                                                   |            |   |   |   |          |            |
|----------|-------------|-------------|----------|----------|--------|---------|---------------------------------------------------|------------|---|---|---|----------|------------|
| POS06585 | 214183.2718 | 226278.7874 | 0.079256 | 0.847043 | 0.931  | 0.02106 | 4-Nitrophenyl sulfate                             | -9.7307418 | - | - | - | 61.1931  | 220.177144 |
| POS06586 | 1491890.667 | 1427447.815 | -0.0637  | 0.81833  | 0.9171 | 0.10989 | 4,8-dihydroxy-2H-furo[2,3-h]chromen-2-one         | 11.862563  | - | - | - | 61.18855 | 219.173865 |
| POS06590 | 45852.52986 | 49134.49771 | 0.099735 | 0.71007  | 0.8585 | 0.0235  | Anthocyanin 3'-O-beta-D-glucoside                 | 8.3695606  | - | - | - | 60.8478  | 386.397702 |
| POS06591 | 183004.3089 | 203111.0772 | 0.150391 | 0.418008 | 0.6797 | 0.08799 | 3',5'-Cyclic dAMP                                 | 8.6412729  | - | - | - | 60.84775 | 314.216483 |
| POS06594 | 221194.6006 | 189029.0253 | -0.22671 | 0.076485 | 0.3703 | 0.13577 | Gonyautoxin 1                                     | -0.2699225 | - | - | - | 60.8127  | 412.355666 |
| POS06595 | 141580.336  | 160890.4743 | 0.184458 | 0.231859 | 0.553  | 0.0973  | N-Methyl-14-O-demethylepiporphyrone               | -23.931916 | - | - | - | 60.5351  | 372.382189 |
| POS06596 | 126189.8861 | 151094.9914 | 0.25986  | 0.624272 | 0.8129 | 0.06389 | N-Hydroxy-MeIQx                                   | 9.5556577  | - | - | - | 60.4927  | 230.247367 |
| POS06598 | 36470391.78 | 20971496.75 | -0.7983  | 0.477703 | 0.7223 | 1.91887 | Nitrogen mustard                                  | -9.0093093 | - | - | - | 60.16365 | 157.059371 |
| POS06599 | 875681.0643 | 750720.9799 | -0.22213 | 0.332296 | 0.6326 | 0.22054 | L-Tyrosine methyl ester 4-sulfate                 | -21.092611 | - | - | - | 60.1336  | 276.27977  |
| POS06600 | 11502598.32 | 9832376.366 | -0.22635 | 0.326758 | 0.6319 | 0.78836 | Phloretin                                         | 2.5461462  | - | - | - | 60.11105 | 275.276675 |
| POS06602 | 262077.4268 | 202001.7124 | -0.37563 | 0.407687 | 0.673  | 0.13554 | 3,5-dimethoxy-2-hydroxy-3,5-dimethoxybenzaldehyde | 22.430248  | - | - | - | 59.9214  | 332.314708 |
| POS06604 | 2076772.23  | 1655858.121 | -0.32676 | 0.039239 | 0.2958 | 0.52444 | Pyruvate                                          | 16.054258  | - | - | - | 59.8398  | 89.0707904 |
| POS06605 | 16660.79356 | 11266.74154 | -0.56439 | 0.511228 | 0.7452 | 0.03702 | Sulfadimethoxine sodium                           | -0.2085762 | - | - | - | 59.8291  | 333.318007 |
| POS06612 | 5378125.281 | 4735147.817 | -0.18369 | 0.877624 | 0.9458 | 0.30339 | Dihydroxyaluminium                                | -5.3624442 | - | - | - | 59.65955 | 138.077342 |
| POS06614 | 3976574.859 | 3722950.712 | -0.09508 | 0.599688 | 0.7973 | 0.18732 | Cyazine                                           | 19.856982  | - | - | - | 59.4768  | 241.704756 |
| POS06616 | 46317.76448 | 55483.7638  | 0.2605   | 0.278348 | 0.594  | 0.06158 | GDP-4-acetamido-4,6-dideoxy-alpha-D-mannose       | -17.722138 | - | - | - | 59.4728  | 631.389705 |
| POS06621 | 97525.18498 | 73440.70596 | -0.40919 | 0.261979 | 0.5794 | 0.10886 | Aucubin                                           | -9.8378528 | - | - | - | 59.13825 | 347.333669 |
| POS06622 | 693882.3698 | 511125.5323 | -0.44101 | 0.063476 | 0.3435 | 0.36397 | Capensinidin                                      | -0.9953097 | - | - | - | 59.11385 | 346.330333 |
| POS06624 | 67599.57333 | 62163.96157 | -0.12094 | 0.487982 | 0.7295 | 0.03752 | PG(a-13:0/18:2(9Z,11Z))                           | 7.1679795  | - | - | - | 59.0847  | 705.935329 |
| POS06638 | 488194.1515 | 325933.7506 | -0.58288 | 0.30581  | 0.6178 | 0.25097 | L-Asp(4-L-Arg)                                    | -0.657288  | - | - | - | 58.65195 | 290.295486 |
| POS06640 | 772658.5746 | 1021411.021 | 0.402661 | 0.201951 | 0.5264 | 0.35298 | 1,7-diphospho-1-epivalienol                       | 20.915194  | - | - | - | 58.5072  | 337.141307 |
| POS06657 | 216863.2371 | 212795.9053 | -0.02732 | 0.877687 | 0.9458 | 0.01293 | Adenosylselenomethionin                           | -5.6496318 | - | - | - | 58.1939  | 447.345055 |
| POS06659 | 31425.9901  | 43628.03735 | 0.473297 | 0.217788 | 0.5389 | 0.07403 | dTDP-L-epivancosamine                             | -13.095258 | - | - | - | 58.1401  | 546.372135 |



|          |             |             |          |          |        |         |                                                       |            |   |   |   |          |            |
|----------|-------------|-------------|----------|----------|--------|---------|-------------------------------------------------------|------------|---|---|---|----------|------------|
| POS06663 | 6845.237026 | 15223.15794 | 1.153095 | 0.044069 | 0.3081 | 0.07272 | Aminobacteriohopanetriol                              | -24.411406 | - | - | - | 58.1298  | 546.873551 |
| POS06672 | 50830262.79 | 42024775.25 | -0.27445 | 0.521762 | 0.7515 | 1.80104 | 2,5-Furandicarboxylate                                | -20.505301 | - | - | - | 57.9512  | 157.097076 |
| POS06673 | 1989834.793 | 1733372.335 | -0.19907 | 0.217264 | 0.5384 | 0.31155 | Tetrahydroxypteridine                                 | 2.3881233  | - | - | - | 57.9343  | 197.128145 |
| POS06674 | 182779.0276 | 75308.45492 | -1.27922 | 0.3301   | 0.6326 | 0.20185 | UDP-L-Ara4N                                           | 11.449826  | - | - | - | 57.8775  | 536.304406 |
| POS06682 | 36073.95985 | 22100.53677 | -0.70688 | 0.237367 | 0.5572 | 0.08073 | Diacetylspermine                                      | 9.9987408  | - | - | - | 57.8251  | 360.345869 |
| POS06684 | 1182803.609 | 1338861.424 | 0.178796 | 0.565865 | 0.7776 | 0.18262 | Aminomalate                                           | -22.462666 | - | - | - | 57.8141  | 120.080702 |
| POS06687 | 107342.3437 | 164220.2567 | 0.613413 | 0.328197 | 0.6322 | 0.14969 | Carboplatin                                           | -9.1479963 | - | - | - | 57.78815 | 372.25788  |
| POS06688 | 2147838.444 | 1593362.554 | -0.43081 | 0.079002 | 0.3738 | 0.62495 | Flutriafol                                            | 21.243106  | - | - | - | 57.7545  | 302.304377 |
| POS06689 | 2856493.423 | 1671060.701 | -0.77348 | 0.140584 | 0.464  | 0.70941 | 2-Aminoethyl diphenylborite                           | 24.92323   | - | - | - | 57.6583  | 226.106787 |
| POS06690 | 295714.5419 | 176403.129  | -0.74533 | 0.03277  | 0.2781 | 0.2983  | Violaceinic acid                                      | -19.510721 | - | - | - | 57.6391  | 374.361492 |
| POS06691 | 367129.5779 | 260200.2779 | -0.49667 | 0.090615 | 0.39   | 0.27131 | (2-methoxy-4-(2-oxooxolan-2-yl)methyl)benzyl benzoate | 1.5980599  | - | - | - | 57.6368  | 303.30776  |
| POS06692 | 252019.7102 | 238106.7949 | -0.08193 | 0.698471 | 0.8515 | 0.02795 | Chlorobenside                                         | -23.616337 | - | - | - | 57.61765 | 270.190419 |
| POS06702 | 2166004.668 | 1927214.693 | -0.16852 | 0.262714 | 0.58   | 0.26514 | 3-(Imidazol-4-yl)-2-oxopropyl phosphate               | 4.2566471  | - | - | - | 57.4958  | 221.128014 |
| POS06704 | 51652.95394 | 81288.53123 | 0.654201 | 0.271902 | 0.5889 | 0.09028 | Coformycin                                            | 7.5878217  | - | - | - | 57.4882  | 285.277934 |
| POS06705 | 5782094.207 | 4673698.126 | -0.30703 | 0.675814 | 0.8399 | 0.42103 | Stipitatote                                           | -17.28896  | - | - | - | 57.4882  | 209.128178 |
| POS06715 | 162206.5871 | 583592.4415 | 1.847129 | 0.060558 | 0.3387 | 0.5092  | (2-carboxy-3-oxopropenyl)-4,6-dihydroxynicotinate     | -20.473663 | - | - | - | 57.4571  | 254.167193 |
| POS06718 | 5948376.275 | 5321043.731 | -0.16079 | 0.772846 | 0.8949 | 0.18303 | Isopentenyl phosphate                                 | -10.51529  | - | - | - | 57.4439  | 167.11773  |
| POS06720 | 137034.9709 | 126234.3649 | -0.11844 | 0.549884 | 0.7693 | 0.06028 | PA(15:0/20:4(5Z,8Z,11Z,14Z))                          | -6.3872752 | - | - | - | 57.43885 | 683.922915 |
| POS06722 | 2858857.275 | 2784700.028 | -0.03792 | 0.866552 | 0.9399 | 0.02062 | 3-Oxalomalate                                         | -8.7714255 | - | - | - | 57.372   | 207.112469 |
| POS06723 | 6154997.172 | 4739591.348 | -0.377   | 0.094162 | 0.3973 | 0.88423 | 2,3,6-Trihydroxypyridine                              | 11.65651   | - | - | - | 57.3255  | 128.106858 |
| POS06728 | 594798.6756 | 435523.6883 | -0.44965 | 0.557651 | 0.7732 | 0.17415 | 5'-Phosphoribosyl-N-formylglycimide                   | 2.4070223  | - | - | - | 57.3055  | 315.194533 |
| POS06735 | 189608.3895 | 178496.0614 | -0.08713 | 0.766629 | 0.8917 | 0.03665 | Methyl nigakinone                                     | -8.1509507 | - | - | - | 57.13185 | 281.283092 |
| POS06736 | 196738.1153 | 198023.1139 | 0.009392 | 0.973139 | 0.9874 | 0.00129 | Picein                                                | -7.6826049 | - | - | - | 57.13185 | 299.293485 |

|          |             |             |          |          |        |         |                                                                                                                          |            |   |   |   |          |            |
|----------|-------------|-------------|----------|----------|--------|---------|--------------------------------------------------------------------------------------------------------------------------|------------|---|---|---|----------|------------|
| POS06745 | 802344.4183 | 681160.7132 | -0.23623 | 0.404877 | 0.6713 | 0.17614 | Hydroxysanguirine                                                                                                        | -9.4338962 | - | - | - | 56.92475 | 348.3249   |
| POS06747 | 8240.22838  | 20974.86582 | 1.347905 | 0.113939 | 0.4271 | 0.09051 | 5,4-dimethoxy-2-(2,4,5-trihydroxy-3-(3,4,5-trihydroxybenzoyloxy)phenyl)methyl]-4-(beta-D-ribofuranosyl)aniline 5'        | -2.829116  | - | - | - | 56.8277  | 491.334889 |
| POS06754 | 2250782.182 | 2128119.544 | -0.08085 | 0.734969 | 0.8744 | 0.07933 | Citrate                                                                                                                  | 13.265131  | - | - | - | 56.7725  | 193.133325 |
| POS06756 | 128689.2669 | 98201.24916 | -0.39008 | 0.093009 | 0.3958 | 0.13042 | N-[(1,8-Dimethylpiperin-6-yl)methyl]-4-(beta-D-ribofuranosyl)aniline 5'                                                  | -21.485419 | - | - | - | 56.6946  | 483.381312 |
| POS06758 | 72730.24196 | 54179.3446  | -0.42481 | 0.050821 | 0.3197 | 0.11078 | Cartormin                                                                                                                | 0.6759994  | - | - | - | 56.58745 | 576.525766 |
| POS06762 | 104091.4108 | 30594.48364 | -1.76651 | 0.034509 | 0.283  | 0.22389 | Halomon                                                                                                                  | -19.253978 | - | - | - | 56.4554  | 402.392648 |
| POS06770 | 31152.7794  | 32679.97111 | 0.069046 | 0.926438 | 0.9665 | 0.0145  | L-Threonylcarbamoyladenylate                                                                                             | 17.623835  | - | - | - | 56.3875  | 493.350553 |
| POS06771 | 118641.2758 | 101718.606  | -0.22202 | 0.548641 | 0.7686 | 0.0603  | Ciprofloxacin                                                                                                            | -20.326454 | - | - | - | 56.3569  | 332.342042 |
| POS06775 | 1545236.353 | 733895.0121 | -1.07418 | 0.018215 | 0.2285 | 0.76341 | Samaderin A                                                                                                              | -0.7635757 | - | - | - | 56.2681  | 331.338924 |
| POS06780 | 36997.8532  | 43120.72156 | 0.22094  | 0.752107 | 0.8844 | 0.0311  | m-Trigallic acid                                                                                                         | 10.153976  | - | - | - | 56.18905 | 475.340193 |
| POS06785 | 247737.9536 | 229114.6137 | -0.11275 | 0.031139 | 0.2714 | 0.12042 | PA(18:1(11Z)/15:0)                                                                                                       | -16.934236 | - | - | - | 56.128   | 661.910085 |
| POS06786 | 102018.3442 | 77440.27091 | -0.39767 | 0.108824 | 0.4191 | 0.12157 | L-[(1-methoxy(2-methoxy-1,3-benzodioxol-5-yl)methyl)amino]propanoic acid                                                 | 1.674885   | - | - | - | 56.128   | 270.216727 |
| POS06791 | 12798.0554  | 16284.49921 | 0.347575 | 0.673628 | 0.8392 | 0.03102 | HR1917                                                                                                                   | -13.865192 | - | - | - | 56.0964  | 571.426568 |
| POS06792 | 301164.3895 | 318395.9188 | 0.080271 | 0.622131 | 0.8124 | 0.07557 | DHAP(6:0)                                                                                                                | 7.9919413  | - | - | - | 55.9772  | 269.21022  |
| POS06794 | 54090.84563 | 44887.25992 | -0.26908 | 0.536401 | 0.7595 | 0.0551  | (6-carboxy-2,4,5-trihydroxyoxan-2-yl)[4-(2H-chroman-7,8-dimethoxy-2H-1,4-benzoxazin-3(4H)-one-2-ylidene)oxy]benzoic acid | -10.76308  | - | - | - | 55.94925 | 400.376978 |
| POS06795 | 1369.66827  | 1168.107154 | -0.22965 | 0.876031 | 0.9451 | 0.0093  | Carboxymethylenebut-2-enyl chloride                                                                                      | -24.299437 | - | - | - | 55.94795 | 404.335476 |
| POS06796 | 4055262.154 | 2336170.931 | -0.79565 | 0.030725 | 0.2698 | 1.07336 | Calcium hydroxide                                                                                                        | 8.9382564  | - | - | - | 55.9328  | 141.102129 |
| POS06799 | 36562087.02 | 26256096.07 | -0.4777  | 0.002323 | 0.1065 | 3.02138 | Calcium hydroxide                                                                                                        | -4.0567302 | - | - | - | 55.8071  | 75.099676  |
| POS06800 | 719829.104  | 600199.2334 | -0.26221 | 0.031355 | 0.2724 | 0.27165 | Boc-Asn-OPhNO2                                                                                                           | 2.1300332  | - | - | - | 55.7798  | 354.335329 |
| POS06808 | 486648.3983 | 471730.3259 | -0.04492 | 0.924229 | 0.9658 | 0.03775 | Diflunisal                                                                                                               | -19.686645 | - | - | - | 55.5236  | 251.199951 |
| POS06817 | 479054.0432 | 192745.8167 | -1.31349 | 0.187436 | 0.5135 | 0.35465 | Deoxy-5-methylcytidylate                                                                                                 | 17.537197  | - | - | - | 55.4095  | 322.23661  |
| POS06820 | 203367.678  | 169636.0492 | -0.26165 | 0.000653 | 0.0721 | 0.17553 | Estramustine phosphate sodium                                                                                            | -4.7392547 | - | - | - | 55.1755  | 565.351302 |
| POS06826 | 1743196.844 | 700515.956  | -1.31525 | 0.002918 | 0.117  | 0.9257  | Miraxanthin-I                                                                                                            | -11.559809 | - | - | - | 55.14635 | 359.370034 |

|          |             |             |          |          |        |         |                                                                                    |            |   |   |   |          |            |
|----------|-------------|-------------|----------|----------|--------|---------|------------------------------------------------------------------------------------|------------|---|---|---|----------|------------|
| POS06827 | 497770.8085 | 386620.934  | -0.36456 | 0.175538 | 0.5017 | 0.23929 | Tricrozarin A                                                                      | 16.887582  | - | - | - | 55.14055 | 295.225945 |
| POS06828 | 136959.0474 | 105101.21   | -0.38197 | 0.000249 | 0.0721 | 0.17519 | Canthaxanthin                                                                      | 10.233359  | - | - | - | 55.13165 | 565.852757 |
| POS06832 | 8737672.346 | 3991349.597 | -1.13037 | 0.034526 | 0.283  | 1.73244 | Deoxyviolaceinic acid                                                              | -7.5326497 | - | - | - | 55.1107  | 358.366685 |
| POS06833 | 160269.6593 | 54957.40657 | -1.54412 | 0.007096 | 0.1777 | 0.28495 | Sinigrin                                                                           | -20.440043 | - | - | - | 55.1104  | 360.373231 |
| POS06834 | 25529.76984 | 33943.99151 | 0.410976 | 0.354634 | 0.6386 | 0.03887 | (1S-[1-(7-methoxy-2-oxo-2H-chromen-8-yl)methyl]-2-methylpiperidin-2-yl)sulfonamide | -8.2524106 | - | - | - | 55.1083  | 357.354336 |
| POS06843 | 255931.4443 | 132409.4382 | -0.95075 | 0.090618 | 0.39   | 0.251   | Se-Methylselenomethionine                                                          | 10.751345  | - | - | - | 55.0336  | 212.150447 |
| POS06845 | 31520.40142 | 12185.55928 | -1.37111 | 0.324751 | 0.631  | 0.08744 | UDP-N-acetyl-2-amino-2-deoxy-D-glucurose                                           | -6.2778891 | - | - | - | 54.9411  | 622.340576 |
| POS06846 | 170116.1944 | 139162.7045 | -0.28975 | 0.301084 | 0.6141 | 0.10979 | 8-Oxoguanine                                                                       | -9.1402564 | - | - | - | 54.9275  | 166.115367 |
| POS06849 | 4868884.801 | 3013306.657 | -0.69224 | 0.21711  | 0.5384 | 0.91172 | Trifluoromethanesulfonic acid                                                      | -22.621355 | - | - | - | 54.8801  | 151.080882 |
| POS06851 | 216176.0474 | 270880.2606 | 0.325449 | 0.535441 | 0.7591 | 0.06769 | O-Phospho-L-serine                                                                 | -21.380171 | - | - | - | 54.7996  | 186.07582  |
| POS06852 | 53177.95342 | 20032.25936 | -1.4085  | 0.380392 | 0.6542 | 0.10946 | Formothion                                                                         | 14.477598  | - | - | - | 54.77115 | 258.278501 |
| POS06853 | 365579.0082 | 352496.1816 | -0.05258 | 0.830265 | 0.9227 | 0.02365 | norsertaline                                                                       | -0.3042237 | - | - | - | 54.7657  | 293.210188 |
| POS06856 | 2914380.623 | 1851359.414 | -0.6546  | 0.016869 | 0.2275 | 0.92005 | D-Ribose 5-phosphate                                                               | 12.144416  | - | - | - | 54.759   | 231.119871 |
| POS06862 | 705822.9284 | 525797.0534 | -0.4248  | 0.23925  | 0.559  | 0.23331 | Flutamide                                                                          | -13.58975  | - | - | - | 54.51345 | 277.215423 |
| POS06863 | 185974.0796 | 345598.3327 | 0.893995 | 0.339458 | 0.6326 | 0.1779  | 4-Bromophenylthiourea                                                              | 13.273281  | - | - | - | 54.47985 | 232.123244 |
| POS06865 | 123314.2223 | 132347.7569 | 0.101995 | 0.64836  | 0.8276 | 0.03842 | Benzoyl meso-tartaric acid                                                         | -4.6666348 | - | - | - | 54.4502  | 255.19899  |
| POS06871 | 1059210.406 | 697066.7697 | -0.60362 | 0.037653 | 0.2904 | 0.49129 | N-Acetyldemethylphosphinotricin                                                    | -13.20267  | - | - | - | 54.42755 | 210.141415 |
| POS06873 | 325421.2833 | 281515.6498 | -0.20909 | 0.492401 | 0.7324 | 0.07779 | Bis(2-chloro-1-methylethyl)ether                                                   | 19.290734  | - | - | - | 54.3667  | 172.075477 |
| POS06874 | 1857723.669 | 2524015.175 | 0.442185 | 0.579388 | 0.7851 | 0.36281 | meso-Tartaric acid                                                                 | 16.466855  | - | - | - | 54.3142  | 151.096548 |
| POS06875 | 1351235.26  | 850930.1505 | -0.66717 | 0.230508 | 0.552  | 0.43213 | Oxalosuccite                                                                       | 14.705192  | - | - | - | 54.2576  | 191.117672 |
| POS06879 | 483361.0538 | 418601.6415 | -0.20752 | 0.003635 | 0.129  | 0.23742 | (2S,3S,2R,3R,6R)-5,6-Epoxy-5,6-dihydro-3',5,8'-trihydroxy hexa-hydro               | 11.617546  | - | - | - | 54.10325 | 617.884043 |
| POS06882 | 121821.3454 | 109293.9574 | -0.15655 | 0.292676 | 0.6073 | 0.06698 | GW 4064                                                                            | -9.6535188 | - | - | - | 54.1003  | 543.839636 |
| POS06890 | 9455.595723 | 19875.09913 | 1.071722 | 0.023182 | 0.2482 | 0.08336 | 5,4-Dimethyl-3-nyuroxy-4-S-glutathionyl bromobenzene                               | -3.0764709 | - | - | - | 54.0909  | 481.336599 |

|          |             |             |          |          |        |         |                                                             |            |   |   |   |          |            |
|----------|-------------|-------------|----------|----------|--------|---------|-------------------------------------------------------------|------------|---|---|---|----------|------------|
| POS06894 | 4041715.747 | 3072227.802 | -0.39568 | 0.128315 | 0.4471 | 0.74449 | Methyl 2-propenyl selenide                                  | -11.994081 | - | - | - | 53.8061  | 136.075657 |
| POS06897 | 5164.3343   | 33809.15363 | 2.71076  | 0.041163 | 0.2989 | 0.14086 | 3-Hydroxy-L-tyrosyl-AMP                                     | -0.1797351 | - | - | - | 53.7541  | 527.401082 |
| POS06908 | 238063.3547 | 200398.5637 | -0.24847 | 0.473924 | 0.7203 | 0.08104 | Sevoflurane                                                 | 17.436271  | - | - | - | 53.12635 | 201.065565 |
| POS06917 | 536998.6562 | 435354.4826 | -0.30273 | 0.001412 | 0.0864 | 0.29757 | <sup>o</sup> -Hydroxydesacetylvaricin                       | 1.9816355  | - | - | - | 52.9245  | 595.871055 |
| POS06921 | 287869.2543 | 237249.8088 | -0.27901 | 0.265216 | 0.5818 | 0.12894 | ( <i>incorr</i> )<br>2-Hydroxy-6-oxono-2,4-diene-1,9-dioate | -20.6847   | - | - | - | 52.7688  | 215.174947 |
| POS06924 | 11203.01627 | 32361.36518 | 1.530385 | 0.113956 | 0.4271 | 0.11304 | N,N'-Diacetylchitobiose 6'-phosphate                        | 0.1748273  | - | - | - | 52.7464  | 505.387565 |
| POS06934 | 1144025.441 | 987338.2215 | -0.2125  | 0.533949 | 0.7588 | 0.15566 | Calcium oxalate                                             | -16.791936 | - | - | - | 52.4568  | 129.102126 |
| POS06935 | 1890329.895 | 1294103.634 | -0.54668 | 0.096896 | 0.4028 | 0.64649 | Calcium L-aspartate                                         | -15.800839 | - | - | - | 52.4465  | 172.169372 |
| POS06938 | 139384.9714 | 106226.7408 | -0.39193 | 0.097661 | 0.4036 | 0.1471  | Pteroyltri glutamic acid                                    | 12.985998  | - | - | - | 52.4107  | 700.641762 |
| POS06940 | 47493.28556 | 44861.17531 | -0.08226 | 0.860125 | 0.9365 | 0.01086 | 11,15-dimethoxy-17,18-dimethoxy-6,8,20-trioxoantennal       | 13.870692  | - | - | - | 52.4027  | 371.325413 |
| POS06941 | 170852.946  | 311704.0482 | 0.867422 | 0.408632 | 0.6736 | 0.23285 | 3-(2-Carboxyethenyl)-cis,cis-mucote                         | 18.635855  | - | - | - | 52.4014  | 213.16743  |
| POS06942 | 211564.784  | 164492.1698 | -0.36308 | 0.300428 | 0.6132 | 0.1306  | 4,4'-Diaminostilbene dihydrochloride                        | 9.0343398  | - | - | - | 52.3991  | 284.206035 |
| POS06948 | 209908.9289 | 179008.4215 | -0.22974 | 0.426216 | 0.6861 | 0.07324 | 6-Deoxy-6-sulfo-D-glucono-1,5-lactone                       | -20.501921 | - | - | - | 52.0661  | 243.206111 |
| POS06954 | 1582074.534 | 2029533.887 | 0.359331 | 0.562004 | 0.776  | 0.33917 | Cytosine                                                    | 24.133684  | - | - | - | 52.0631  | 112.111958 |
| POS06958 | 352768.4977 | 228459.3327 | -0.62678 | 0.110004 | 0.4215 | 0.23204 | Anthragallol                                                | 15.418057  | - | - | - | 52.0477  | 257.221527 |
| POS06963 | 91111.73411 | 77295.36461 | -0.23725 | 0.041366 | 0.2993 | 0.09673 | Glycerophosphocholine                                       | -13.212857 | - | - | - | 51.7196  | 258.225178 |
| POS06969 | 487759.5493 | 407989.4036 | -0.25764 | 0.016294 | 0.2246 | 0.23244 | Pancuronium                                                 | -19.529597 | - | - | - | 51.6527  | 573.857989 |
| POS06973 | 293288.914  | 166870.7241 | -0.81359 | 0.095266 | 0.3994 | 0.26021 | 4-hydroxy-3-nitrophenylacetate                              | 20.698331  | - | - | - | 51.3858  | 197.150336 |
| POS06977 | 159548.9279 | 143991.4489 | -0.14802 | 0.57158  | 0.7805 | 0.06172 | GDP-3,6-dideoxy-D-galactose                                 | 16.87469   | - | - | - | 51.38355 | 574.359252 |
| POS06978 | 68046.01729 | 60030.23679 | -0.18082 | 0.440197 | 0.6972 | 0.04736 | Malonyl-CoA                                                 | -9.6497455 | - | - | - | 51.381   | 854.57934  |
| POS06979 | 3918320.79  | 2834247.453 | -0.46727 | 0.104537 | 0.4116 | 0.69271 | N-Dimethyl-2-aminoethylphosphote                            | -9.561488  | - | - | - | 51.3779  | 154.122513 |
| POS06984 | 1636920.027 | 955636.1773 | -0.77645 | 0.467561 | 0.7159 | 0.31202 | Quisqualic acid                                             | 0.7546214  | - | - | - | 51.1345  | 190.133619 |
| POS06987 | 131492.8181 | 119914.2133 | -0.13298 | 0.65134  | 0.829  | 0.05302 | Pseudohypericin                                             | 8.8480233  | - | - | - | 51.0778  | 521.454481 |

|          |             |             |          |          |        |         |                                                          |            |   |   |   |          |            |
|----------|-------------|-------------|----------|----------|--------|---------|----------------------------------------------------------|------------|---|---|---|----------|------------|
| POS06991 | 1092045.101 | 847747.478  | -0.36533 | 0.043572 | 0.3066 | 0.39831 | Phosphotyrosine                                          | 14.440094  | - | - | - | 51.0464  | 262.179448 |
| POS06992 | 53647.55025 | 44268.3199  | -0.27724 | 0.259631 | 0.5782 | 0.05589 | Selenodiglutathione                                      | 2.3763647  | - | - | - | 51.0464  | 692.60002  |
| POS06994 | 56044.61225 | 41207.6158  | -0.44366 | 0.28667  | 0.6021 | 0.06985 | Cyhexatin                                                | -16.960904 | - | - | - | 51.0445  | 386.172744 |
| POS06995 | 515539.2939 | 575763.256  | 0.159393 | 0.634988 | 0.8188 | 0.09918 | Dihydrostreptomycin 3'alpha,6-bisphosphate               | 3.3068407  | - | - | - | 51.0402  | 744.559435 |
| POS06998 | 1525325.743 | 1010473.368 | -0.59409 | 0.014034 | 0.2172 | 0.61229 | Oxaloacetate                                             | -22.10027  | - | - | - | 51.0245  | 133.075958 |
| POS07000 | 68635.13302 | 50292.34232 | -0.44861 | 0.059814 | 0.3369 | 0.11274 | Pumiloside                                               | 12.49      | - | - | - | 50.92575 | 513.522178 |
| POS07004 | 868204.1975 | 854591.4917 | -0.0228  | 0.899286 | 0.9537 | 0.05081 | Coenzyme F420                                            | 7.9775833  | - | - | - | 50.8643  | 774.606048 |
| POS07006 | 140218.1434 | 87328.20582 | -0.68315 | 0.214597 | 0.5366 | 0.13828 | Selenohomocystine                                        | -19.804714 | - | - | - | 50.7584  | 363.143704 |
| POS07010 | 1400927.21  | 1411804.334 | 0.011158 | 0.967787 | 0.9854 | 0.00966 | 5,4,5-trihydroxy-6-(1S-hydroxy-2-(hydroxymethyl)-2       | -17.016907 | - | - | - | 50.712   | 311.256997 |
| POS07012 | 122556.182  | 111143.9425 | -0.14101 | 0.572379 | 0.7811 | 0.04602 | Reduced coenzyme F420                                    | -0.0835688 | - | - | - | 50.712   | 776.615712 |
| POS07014 | 67424.29719 | 74145.30228 | 0.137087 | 0.644734 | 0.8254 | 0.03807 | Proanthocyanidin A2                                      | 8.0551024  | - | - | - | 50.7041  | 577.51632  |
| POS07015 | 1177794.899 | 1593894.545 | 0.436468 | 0.426739 | 0.6863 | 0.35388 | Vicianose                                                | -16.45586  | - | - | - | 50.7039  | 313.272638 |
| POS07017 | 454183.6956 | 431632.4053 | -0.07347 | 0.785016 | 0.9013 | 0.03392 | Protocatecholphloroglucinolacetate                       | -19.205238 | - | - | - | 50.7033  | 307.225795 |
| POS07021 | 307843.1025 | 324256.7404 | 0.074941 | 0.858304 | 0.9354 | 0.04561 | Bromodiphenhydramine                                     | -4.0059855 | - | - | - | 50.62445 | 335.256938 |
| POS07035 | 151714.3665 | 279865.9973 | 0.883379 | 0.356852 | 0.6404 | 0.21321 | Manniflavanone                                           | 1.3468258  | - | - | - | 50.36945 | 591.495972 |
| POS07040 | 41500.13877 | 56279.4158  | 0.439491 | 0.359624 | 0.6425 | 0.07051 | 19-Bromoaplysiatoxin                                     | 15.822716  | - | - | - | 50.36315 | 751.528752 |
| POS07044 | 38303.29824 | 60091.5142  | 0.649693 | 0.424174 | 0.6846 | 0.07552 | Protoleucomelone                                         | -0.5165696 | - | - | - | 50.3472  | 593.510771 |
| POS07055 | 70340.22011 | 88607.17112 | 0.333074 | 0.63303  | 0.8185 | 0.06108 | Apigenin 7-O-glucuronide (1->2)-glucuronide] 4'          | -10.736245 | - | - | - | 50.064   | 799.608003 |
| POS07056 | 1098011.435 | 727304.024  | -0.59426 | 0.026851 | 0.2585 | 0.51762 | L-Amino-4-oxo-6-(1,2-dioxopropyl)-7,8-dihydroxysteridina | 20.597567  | - | - | - | 50.0543  | 268.21108  |
| POS07059 | 165031.6327 | 146298.8905 | -0.17382 | 0.608418 | 0.8042 | 0.05654 | Theogallin                                               | -12.114517 | - | - | - | 50.0543  | 801.624277 |
| POS07064 | 455842.0089 | 358659.4663 | -0.34592 | 0.396825 | 0.6661 | 0.17933 | Delphinidin 3,5-di(6-O-malonylglucoside)                 | -3.9631487 | - | - | - | 50.026   | 800.621308 |
| POS07068 | 42079.74208 | 70325.10536 | 0.740914 | 0.336751 | 0.6326 | 0.09609 | 5,4,5-trihydroxy-6-((6,13,14-trihydroxy-3,10-            | -13.213005 | - | - | - | 50.00165 | 791.544831 |
| POS07070 | 196277.8839 | 204488.2066 | 0.05912  | 0.856843 | 0.9351 | 0.02805 | (11-dihydroxy-15,16-dioxo-6,8,19-trioxanocyclo[10.7.0.0n | 10.687445  | - | - | - | 49.95735 | 409.341641 |

|          |             |             |          |          |        |         |                                                                     |            |   |   |   |          |            |
|----------|-------------|-------------|----------|----------|--------|---------|---------------------------------------------------------------------|------------|---|---|---|----------|------------|
| POS07073 | 855746.9195 | 830758.6493 | -0.04275 | 0.930889 | 0.9685 | 0.01053 | Oxaloglutarate                                                      | 7.8607284  | - | - | - | 49.8092  | 205.143081 |
| POS07075 | 157565.7034 | 208098.6577 | 0.401314 | 0.578035 | 0.7845 | 0.09633 | Luteoskyrin                                                         | 9.2601287  | - | - | - | 49.752   | 575.501096 |
| POS07078 | 267047.1508 | 187481.2627 | -0.51035 | 0.111658 | 0.4241 | 0.19797 | L-AMINO-3,4-dihydroxypentanedioic acid                              | -23.931904 | - | - | - | 49.7019  | 180.13109  |
| POS07080 | 63249.6897  | 66252.38275 | 0.066914 | 0.867307 | 0.9403 | 0.01637 | 1H-isochromene-3-carboxylic acid                                    | 24.038744  | - | - | - | 49.7004  | 367.294081 |
| POS07082 | 93487.46051 | 171987.0298 | 0.879455 | 0.331932 | 0.6326 | 0.12638 | Arbutin 6-phosphate                                                 | -21.315806 | - | - | - | 49.60165 | 353.230869 |
| POS07086 | 173734.4234 | 187115.5874 | 0.107046 | 0.846906 | 0.9309 | 0.04545 | Tetracenomyacin D3                                                  | -5.4294536 | - | - | - | 49.34385 | 381.309712 |
| POS07087 | 1488601.469 | 1260315.897 | -0.24017 | 0.341287 | 0.6326 | 0.25452 | Dihydrokaempferol                                                   | -12.508768 | - | - | - | 49.20125 | 289.255871 |
| POS07088 | 11047854.46 | 7297549.609 | -0.59828 | 0.036823 | 0.2883 | 1.62192 | 3-Deoxy-lyxo-heptulosaric acid                                      | -14.625841 | - | - | - | 49.1912  | 223.153527 |
| POS07089 | 9729886.497 | 7832622.839 | -0.31293 | 0.77725  | 0.8978 | 0.41318 | Trimethylselenonium                                                 | -0.5469698 | - | - | - | 49.1668  | 125.070809 |
| POS07094 | 36208.09622 | 27926.89716 | -0.37466 | 0.201885 | 0.5264 | 0.0566  | 1G(2Z,3Z,4Z,5Z,6Z,7Z,8Z,9Z,10Z,11Z,12Z,13Z)/22:5(4Z,7Z,10Z,12Z,16Z) | -20.877731 | - | - | - | 48.9846  | 1040.62547 |
| POS07099 | 8767410.124 | 6796137.038 | -0.36744 | 0.067908 | 0.3531 | 1.07799 | Cyanidin                                                            | 3.8674613  | - | - | - | 48.6694  | 288.252588 |
| POS07103 | 811241.2289 | 1033950.005 | 0.349964 | 0.610389 | 0.8056 | 0.23557 | Sulfur mustard                                                      | 13.76025   | - | - | - | 48.3092  | 160.086766 |
| POS07130 | 2124860.069 | 1372655.78  | -0.6304  | 0.352383 | 0.6365 | 0.44999 | Glyphosate                                                          | 3.7527646  | - | - | - | 46.4669  | 170.081011 |
| POS07131 | 790619.6867 | 650880.5006 | -0.28059 | 0.153805 | 0.4815 | 0.25426 | 4,8-dihydroxy-2H-furo[2,3-h]chromen-2-one                           | 11.994423  | - | - | - | 46.4499  | 219.173893 |
| POS07137 | 3708350.196 | 2770433.845 | -0.42067 | 0.458084 | 0.7106 | 0.59481 | 5-Nitrofurfural                                                     | -18.896064 | - | - | - | 45.33685 | 142.086211 |
| POS07142 | 570189.1791 | 361093.2832 | -0.65907 | 0.128677 | 0.4471 | 0.3366  | Pydanon                                                             | 15.515156  | - | - | - | 44.6951  | 189.148296 |
| POS07143 | 1882453.678 | 848950.9073 | -1.14886 | 0.009908 | 0.194  | 0.91038 | L-(o-carboxy-3,4,5-trihydroxyoxan-2-yl)propanedioic acid            | 9.8363645  | - | - | - | 44.68085 | 281.195033 |
| POS07150 | 9011924.809 | 7811983.773 | -0.20615 | 0.383831 | 0.6571 | 0.71959 | Lettowianthine                                                      | -9.1242072 | - | - | - | 44.2699  | 318.299282 |
| POS07151 | 2822358.318 | 2433101.84  | -0.2141  | 0.375438 | 0.6505 | 0.37593 | Phloretin                                                           | 2.6808558  | - | - | - | 44.2402  | 275.276712 |
| POS07154 | 3365215.91  | 759992.3726 | -2.14664 | 0.289958 | 0.6044 | 0.91254 | Dihydroxyaluminium                                                  | -5.2610871 | - | - | - | 44.12395 | 138.077355 |
| POS07155 | 563212.3285 | 486479.8528 | -0.2113  | 0.496048 | 0.7344 | 0.1301  | Hydroxysanguirine                                                   | -9.4619776 | - | - | - | 44.1162  | 348.32489  |
| POS07158 | 1691030.929 | 1347054.23  | -0.3281  | 0.10734  | 0.4167 | 0.45602 | fluvoxamino acid                                                    | 11.941825  | - | - | - | 43.98305 | 319.302678 |
| POS07167 | 1282120.207 | 1046401.654 | -0.29309 | 0.298279 | 0.6115 | 0.31735 | 3-(Phosphoacetylamido)-L-alanine                                    | 8.627422   | - | - | - | 43.0188  | 243.133166 |

|          |             |             |          |          |        |         |                                                                                                              |            |   |   |   |          |            |
|----------|-------------|-------------|----------|----------|--------|---------|--------------------------------------------------------------------------------------------------------------|------------|---|---|---|----------|------------|
| POS07174 | 805920.3116 | 592175.164  | -0.44461 | 0.289952 | 0.6044 | 0.27462 | 4-Nitrophenol                                                                                                | 13.195009  | - | - | - | 42.6505  | 140.117912 |
| POS07185 | 263045.641  | 166389.0074 | -0.66075 | 0.035306 | 0.2845 | 0.26843 | Capensinidin                                                                                                 | -0.8122775 | - | - | - | 42.0664  | 346.330396 |
| POS07196 | 727793.7388 | 571045.0643 | -0.34993 | 0.219224 | 0.5401 | 0.29423 | Flutriafol                                                                                                   | 21.238804  | - | - | - | 41.7496  | 302.304376 |
| POS07198 | 242584.8488 | 176348.3111 | -0.46006 | 0.562504 | 0.776  | 0.12361 | 5,7,8-trihydroxy-2-(4-hydroxy-3,5-dimethoxyphenyl)-5H-ent-epicatechin (4alpha->8)-ent-epicatechin 3'-collata | 22.475006  | - | - | - | 41.72845 | 332.314723 |
| POS07203 | 30844.56162 | 36845.12778 | 0.256458 | 0.471139 | 0.719  | 0.04178 | >8)-ent-epicatechin 3'-collata                                                                               | -17.785622 | - | - | - | 41.6448  | 731.618782 |
| POS07204 | 1120578.042 | 866756.2619 | -0.37054 | 0.023569 | 0.2493 | 0.41144 | Meconic acid                                                                                                 | -1.8462165 | - | - | - | 41.6446  | 201.109407 |
| POS07208 | 603801.7586 | 451152.3665 | -0.42046 | 0.145716 | 0.4704 | 0.26123 | Lofexidine                                                                                                   | -1.6720798 | - | - | - | 41.6229  | 260.138843 |
| POS07221 | 340686.7466 | 344439.1527 | 0.015803 | 0.971342 | 0.9872 | 0.02619 | L-Selenocystathionine                                                                                        | -18.159405 | - | - | - | 41.46565 | 270.159489 |
| POS07225 | 115157.2218 | 92051.81096 | -0.32309 | 0.417189 | 0.6796 | 0.07392 | malvidin 5-(p-malonylglucoside) 5-glucoside                                                                  | -21.239681 | - | - | - | 41.4024  | 742.615725 |
| POS07231 | 971858.0104 | 855263.5919 | -0.18438 | 0.331581 | 0.6326 | 0.21522 | Se-Propenylselenocysteine Se-oxide                                                                           | -3.592456  | - | - | - | 41.3189  | 225.122871 |
| POS07239 | 541332.8784 | 533931.6629 | -0.01986 | 0.916658 | 0.9615 | 0.03713 | 1,7-diphospho-1-epivalienol                                                                                  | 21.329226  | - | - | - | 41.1324  | 337.141446 |
| POS07241 | 1239179.422 | 933175.1797 | -0.40917 | 0.2551   | 0.5727 | 0.35421 | 5-Phosphoribosylamine                                                                                        | -17.104254 | - | - | - | 41.13035 | 230.128358 |
| POS07245 | 176134.3191 | 295798.3594 | 0.747938 | 0.349851 | 0.6362 | 0.20251 | Cyanidin 5-O-(p-glucosyl-2'-sulfolactoside)                                                                  | -22.432349 | - | - | - | 41.11075 | 744.630695 |
| POS07248 | 988728.043  | 584046.9383 | -0.75949 | 0.154473 | 0.4825 | 0.5032  | Phosphocreatine                                                                                              | -11.58137  | - | - | - | 41.0575  | 212.117932 |
| POS07250 | 467235.7565 | 1125584.214 | 1.268451 | 0.354272 | 0.6383 | 0.3466  | Cobalt sulfate                                                                                               | -19.180195 | - | - | - | 40.9957  | 282.104685 |
| POS07253 | 973913.5526 | 642193.8141 | -0.60078 | 0.239403 | 0.559  | 0.37196 | 4-Nitro-6-oxohepta-2,4-dienedioate cis-4-                                                                    | 18.977687  | - | - | - | 40.9807  | 216.128459 |
| POS07255 | 2464577.481 | 2488953.501 | 0.014199 | 0.942025 | 0.9742 | 0.07161 | Carboxymethylenebut-2-enal alide                                                                             | 8.7085705  | - | - | - | 40.96935 | 141.102097 |
| POS07265 | 1792834.565 | 1616223.925 | -0.14962 | 0.483015 | 0.7262 | 0.20635 | Tetrahydroxypteridine                                                                                        | 2.2697385  | - | - | - | 40.9505  | 197.128122 |
| POS07267 | 846250.3673 | 708423.8434 | -0.25647 | 0.197676 | 0.5233 | 0.22253 | Benoxacor                                                                                                    | -3.8992084 | - | - | - | 40.8529  | 261.122762 |
| POS07269 | 2230241.006 | 2355340.803 | 0.078736 | 0.790203 | 0.9034 | 0.05706 | 4-Oxoproline                                                                                                 | 9.5355221  | - | - | - | 40.8481  | 130.122508 |
| POS07287 | 2073666.679 | 717702.116  | -1.53073 | 0.005758 | 0.1587 | 1.11896 | Sedoheptulose 7-phosphate                                                                                    | 1.2115986  | - | - | - | 40.70895 | 291.169428 |
| POS07292 | 884520.0325 | 668152.3277 | -0.40472 | 0.117734 | 0.4323 | 0.29984 | Mevinphos                                                                                                    | 16.085631  | - | - | - | 40.6459  | 225.159182 |
| POS07293 | 5386596.135 | 4725415.118 | -0.18893 | 0.351513 | 0.6364 | 0.40839 | Trifluoromethanesulfonic acid                                                                                | 14.277489  | - | - | - | 40.64455 | 151.086419 |

|          |             |             |          |          |        |         |                                                                        |            |   |   |   |          |            |
|----------|-------------|-------------|----------|----------|--------|---------|------------------------------------------------------------------------|------------|---|---|---|----------|------------|
| POS07295 | 567133.7248 | 296925.3282 | -0.93359 | 0.075236 | 0.3677 | 0.39079 | Samaderin A                                                            | -0.7787774 | - | - | - | 40.64395 | 331.338919 |
| POS07310 | 1419027.343 | 987821.6207 | -0.52258 | 0.416391 | 0.6793 | 0.33689 | 4-Nitrophenyl phosphate                                                | 2.1993587  | - | - | - | 40.6259  | 220.096458 |
| POS07311 | 724742.2954 | 495454.919  | -0.54871 | 0.126435 | 0.445  | 0.31827 | Barban                                                                 | -3.0933138 | - | - | - | 40.6234  | 259.107178 |
| POS07312 | 565998.1104 | 576930.2176 | 0.0276   | 0.904607 | 0.956  | 0.00922 | L-Denuryro-3-deoxy-D-arabino-heptote 7-phosphata                       | 1.7918476  | - | - | - | 40.6229  | 289.153693 |
| POS07317 | 890643.4725 | 767252.1006 | -0.21515 | 0.20058  | 0.5255 | 0.19385 | DCI                                                                    | 12.048893  | - | - | - | 40.6225  | 249.159167 |
| POS07337 | 117517.2596 | 546897.0181 | 2.218397 | 0.311222 | 0.6218 | 0.30164 | L,0-Dichlorophenolindopheno Sodium salt                                | -4.2497976 | - | - | - | 40.4453  | 291.083344 |
| POS07338 | 488637.5018 | 303652.0531 | -0.68635 | 0.100015 | 0.4061 | 0.2819  | Picein                                                                 | -7.3922743 | - | - | - | 40.4453  | 299.293572 |
| POS07341 | 3436016.299 | 3177546.394 | -0.11282 | 0.635209 | 0.8189 | 0.23713 | Cyazine                                                                | 19.967902  | - | - | - | 40.4204  | 241.704783 |
| POS07344 | 86959.04128 | 74735.66556 | -0.21854 | 0.511741 | 0.7452 | 0.03694 | (6-carboxy-5,4,3-trihydroxyoxan-2-yl)({4-(11 hydroxy 7 (4 hydroxy      | -16.374662 | - | - | - | 40.4167  | 786.677411 |
| POS07354 | 991978.5324 | 956236.7447 | -0.05294 | 0.909799 | 0.9581 | 0.04341 | Dichlormid                                                             | -2.6695911 | - | - | - | 40.3231  | 209.091721 |
| POS07359 | 2743.229143 | 13888.9695  | 2.339993 | 0.327326 | 0.632  | 0.06053 | (1-(1-methoxy-2-oxo-2H-chromen-8-yl)methyl)-2-methyloran 2             | -7.3627616 | - | - | - | 40.3119  | 357.354653 |
| POS07362 | 480205.7774 | 354462.1418 | -0.43802 | 0.162221 | 0.4895 | 0.26431 | Azacozole                                                              | 19.159244  | - | - | - | 40.3066  | 301.153627 |
| POS07364 | 1288611.056 | 974746.5759 | -0.40272 | 0.13016  | 0.4485 | 0.40521 | 3-Sulfopyruvate                                                        | 4.5283145  | - | - | - | 40.30405 | 169.133338 |
| POS07365 | 587232.7823 | 993989.0146 | 0.759297 | 0.35114  | 0.6364 | 0.28244 | S-(4-Bromophenyl)-L-cysteine                                           | -13.139882 | - | - | - | 40.3017  | 277.153848 |
| POS07366 | 776286.687  | 295178.6962 | -1.395   | 0.0066   | 0.1696 | 0.61315 | Miraxanthin-I                                                          | -11.363118 | - | - | - | 40.3017  | 359.370104 |
| POS07367 | 106118.3003 | 189224.9673 | 0.834429 | 0.097705 | 0.4036 | 0.22703 | alpha-1,5-L-Arabinotetraose                                            | -20.431817 | - | - | - | 40.3007  | 547.469911 |
| POS07376 | 143287.7978 | 289749.2029 | 1.015889 | 0.051008 | 0.3203 | 0.31821 | (1,3,4,5-trihydroxy-6-[3,5,7-trihydroxy-2-(2,4,5-trihydroxyphenyl)-3,4 | 15.61896   | - | - | - | 40.2419  | 549.485843 |
| POS07378 | 137134.0538 | 241445.1419 | 0.816109 | 0.208653 | 0.5322 | 0.19309 | Methylselenocysteine Se-oxide                                          | 0.028301   | - | - | - | 40.1964  | 199.086482 |
| POS07379 | 2258961.733 | 1812017.469 | -0.31806 | 0.106064 | 0.4145 | 0.4742  | Citrate                                                                | 13.715985  | - | - | - | 40.1928  | 193.133412 |
| POS07380 | 2797895.366 | 2215153.801 | -0.33694 | 0.225527 | 0.5472 | 0.41821 | 3-Oxalomalate                                                          | -8.8142464 | - | - | - | 40.1885  | 207.11246  |
| POS07385 | 73737.14578 | 130691.571  | 0.825703 | 0.030903 | 0.2705 | 0.21546 | PA(18:1(11Z)/15:0)                                                     | -17.780656 | - | - | - | 40.1603  | 661.909525 |
| POS07386 | 1535454.786 | 680637.6071 | -1.17371 | 0.013038 | 0.211  | 0.83699 | 3-(3,4-Dihydroxyphenyl)pyruvate                                        | 2.5908433  | - | - | - | 40.1527  | 197.164585 |
| POS07387 | 1100567.508 | 1118203.825 | 0.022936 | 0.955331 | 0.9803 | 0.04991 | CoA                                                                    | 23.893501  | - | - | - | 40.1445  | 768.559716 |



|          |             |             |          |          |        |         |                                            |            |   |   |   |          |            |
|----------|-------------|-------------|----------|----------|--------|---------|--------------------------------------------|------------|---|---|---|----------|------------|
| POS07391 | 1506597.976 | 1203437.327 | -0.32413 | 0.141519 | 0.4653 | 0.36438 | S-(1,2-Dichlorovinyl)-L-cysteine           | 17.82872   | - | - | - | 40.1261  | 217.096729 |
| POS07394 | 880638.286  | 2115959.354 | 1.26469  | 0.370813 | 0.6495 | 0.45123 | 3-(2-Carboxyethenyl)-cis,cis-mucote        | -19.885414 | - | - | - | 40.11    | 213.159258 |
| POS07397 | 1792184.674 | 761870.1563 | -1.2341  | 0.007189 | 0.1779 | 0.96196 | 1,1-Dichloro-2,2-diphenylethane            | 1.8299773  | - | - | - | 40.11    | 252.158836 |
| POS07402 | 1895620.719 | 1779387.551 | -0.09129 | 0.646375 | 0.8266 | 0.09622 | Stipitatote                                | -17.492564 | - | - | - | 40.0632  | 209.128136 |
| POS07407 | 3500788.567 | 1513192.868 | -1.21008 | 0.006994 | 0.1764 | 1.23416 | Deoxyviolaceinic acid                      | -7.6194246 | - | - | - | 40.0562  | 358.366654 |
| POS07408 | 1174789.576 | 896333.4771 | -0.39029 | 0.147109 | 0.4726 | 0.32674 | O-Phospho-4-hydroxy-L-threonine            | -19.191399 | - | - | - | 40.0554  | 216.101649 |
| POS07409 | 2377056.003 | 1907795.255 | -0.31727 | 0.062817 | 0.3421 | 0.50882 | Oxalosuccite                               | 14.689933  | - | - | - | 40.0504  | 191.117669 |
| POS07420 | 979794.6724 | 1412906.572 | 0.528115 | 0.408846 | 0.6736 | 0.27826 | unsym-Bis(4'-chlorophenyl)ethylene         | 2.9301446  | - | - | - | 40.0132  | 250.143207 |
| POS07421 | 1092923.914 | 743745.4519 | -0.55531 | 0.444017 | 0.6995 | 0.37451 | 2-epi-5-epi-Valiolone 7-phosphate          | 18.99314   | - | - | - | 40.0132  | 273.158946 |
| POS07424 | 105418.2562 | 154485.5432 | 0.551347 | 0.235327 | 0.5559 | 0.14987 | Proanthocyanidin A2                        | 7.6725097  | - | - | - | 40.0062  | 577.5161   |
| POS07428 | 804829.5015 | 691040.0146 | -0.21991 | 0.385579 | 0.6583 | 0.19343 | 2-Phosphinomethylmalate                    | 0.4876563  | - | - | - | 40.0006  | 213.10188  |
| POS07433 | 565058.3619 | 698935.9673 | 0.30676  | 0.538582 | 0.761  | 0.12547 | Tris(2-methyl-1-aziridinyl)phosphine oxide | 15.303276  | - | - | - | 39.9908  | 216.24307  |
| POS07436 | 122433.8475 | 117236.1976 | -0.06258 | 0.865369 | 0.9391 | 0.00379 | N2-Acetyl-L-aminoadipyl-delta-phosphate    | 17.739191  | - | - | - | 39.9874  | 284.1847   |
| POS07438 | 2407438.014 | 1092902.811 | -1.13933 | 0.327626 | 0.632  | 0.86468 | CNQX                                       | 20.076419  | - | - | - | 39.9874  | 233.164437 |
| POS07441 | 4434054.868 | 3280654.223 | -0.43464 | 0.037702 | 0.2904 | 0.79149 | Diethylphosphoric acid                     | -14.606883 | - | - | - | 39.9795  | 155.106526 |
| POS07443 | 938700.4043 | 876096.557  | -0.09957 | 0.659736 | 0.8327 | 0.10099 | D-Glucurote                                | 11.792498  | - | - | - | 39.9772  | 195.148966 |
| POS07444 | 984912.7956 | 736834.6531 | -0.41866 | 0.05348  | 0.3235 | 0.37265 | Apraclonidine                              | -15.471317 | - | - | - | 39.97685 | 246.111984 |
| POS07448 | 930867.0411 | 303510.512  | -1.61683 | 0.00094  | 0.0736 | 0.71102 | Orellanine                                 | 10.448495  | - | - | - | 39.9764  | 253.190212 |
| POS07449 | 1115375.906 | 864053.2153 | -0.36834 | 0.0555   | 0.3276 | 0.37815 | Oxaloacetate                               | -22.50949  | - | - | - | 39.97515 | 133.075904 |
| POS07450 | 2906056.727 | 2413480.879 | -0.26795 | 0.104944 | 0.412  | 0.47848 | Isopentenyl phosphate                      | -10.51934  | - | - | - | 39.973   | 167.117729 |
| POS07453 | 743521.997  | 483088.9793 | -0.62209 | 0.013853 | 0.2168 | 0.45768 | 3-Dehydroquite                             | -20.841012 | - | - | - | 39.9412  | 191.154014 |
| POS07463 | 5333661.577 | 3713468.025 | -0.52236 | 0.417206 | 0.6796 | 0.84752 | Maleimide                                  | -1.4303521 | - | - | - | 39.8222  | 98.0792378 |
| POS07466 | 541270.44   | 536475.6217 | -0.01284 | 0.91034  | 0.9581 | 0.00199 | Se-Methyl-L-selenocysteine                 | 24.060877  | - | - | - | 39.80595 | 183.091458 |

|          |             |             |          |          |        |         |                                                        |            |   |   |   |          |            |
|----------|-------------|-------------|----------|----------|--------|---------|--------------------------------------------------------|------------|---|---|---|----------|------------|
| POS07474 | 6491751.616 | 6072349.138 | -0.09635 | 0.553675 | 0.7708 | 0.2241  | 2,3,6-Trihydroxypyridine                               | 11.994956  | - | - | - | 39.7646  | 128.106901 |
| POS07475 | 165057.4153 | 145001.6473 | -0.1869  | 0.710319 | 0.8585 | 0.04282 | L-Histidine                                            | 0.6063503  | - | - | - | 39.7646  | 156.161971 |
| POS07478 | 2005766.028 | 1355588.049 | -0.56523 | 0.059044 | 0.336  | 0.66887 | (E)-2-(2-Furyl)-3-(5-nitro-2-furyl)acrylamide          | -13.172741 | - | - | - | 39.75735 | 249.195607 |
| POS07479 | 52177.52487 | 3356732.373 | 6.007485 | 0.345853 | 0.6345 | 0.78925 | Sulfentrazone                                          | -5.1373559 | - | - | - | 39.7464  | 388.195187 |
| POS07480 | 105440.8164 | 153485.2619 | 0.541667 | 0.128565 | 0.4471 | 0.16668 | 2,2',3,3',4',5,6'-Heptabromodiphenyl ether             | 22.831371  | - | - | - | 39.7461  | 723.503372 |
| POS07484 | 54681.7831  | 70185.81791 | 0.360119 | 0.373934 | 0.6502 | 0.07565 | Tri-N-acetylchitotriose                                | -24.522178 | - | - | - | 39.72335 | 628.584687 |
| POS07485 | 723843.3093 | 461331.3058 | -0.64987 | 0.120485 | 0.4373 | 0.37233 | 5-(5-Carboxy-5-oxopropenyl)-4,6-dibenzoylmalonate      | 8.2276334  | - | - | - | 39.71725 | 254.17446  |
| POS07488 | 917924.6361 | 610530.8488 | -0.58831 | 0.006055 | 0.1639 | 0.47671 | D-Glucosamine-6-phosphate                              | 3.9481426  | - | - | - | 39.6949  | 276.158763 |
| POS07492 | 703351.5531 | 499097.9954 | -0.49492 | 0.323207 | 0.6304 | 0.22021 | D-Glucosamine 6-phosphate                              | 21.296533  | - | - | - | 39.6731  | 260.163796 |
| POS07493 | 422615.1831 | 436767.5516 | 0.047521 | 0.865696 | 0.9394 | 0.04967 | Diclofec                                               | 10.407906  | - | - | - | 39.6699  | 297.158959 |
| POS07496 | 402818.7408 | 152354.4119 | -1.4027  | 2.40E-05 | 0.0721 | 0.50531 | Coumermic acid                                         | -20.759667 | - | - | - | 39.6686  | 548.465611 |
| POS07509 | 784957.4906 | 640313.1937 | -0.29384 | 0.079686 | 0.374  | 0.27781 | Aminopyrrolnitrin                                      | 18.763277  | - | - | - | 39.6603  | 228.101438 |
| POS07512 | 1103834.624 | 883618.7419 | -0.32103 | 0.29849  | 0.6115 | 0.25412 | Bowdichione                                            | 9.7716598  | - | - | - | 39.6603  | 299.257191 |
| POS07516 | 276119.7508 | 208365.1678 | -0.40618 | 0.100268 | 0.4065 | 0.18931 | (3-aminopropoxy)sulfonic acid                          | -17.45749  | - | - | - | 39.6585  | 156.174568 |
| POS07522 | 2683585.851 | 2334800.968 | -0.20086 | 0.082187 | 0.3786 | 0.51298 | Methyl (2-propenylthio)selenide                        | 5.069845   | - | - | - | 39.65395 | 168.138124 |
| POS07535 | 1094582.312 | 1059492.22  | -0.04701 | 0.963849 | 0.983  | 0.03891 | S-Sulfo-L-cysteine                                     | 4.9867699  | - | - | - | 39.5633  | 202.22968  |
| POS07539 | 1027529.492 | 791934.4537 | -0.37573 | 0.544232 | 0.7649 | 0.22362 | N-Formylmaleamic acid                                  | -20.506296 | - | - | - | 39.545   | 144.101842 |
| POS07543 | 5696038.477 | 3969983.002 | -0.52083 | 0.051386 | 0.3203 | 1.09858 | 5-[5,5-diamyaroxy-4-(sulfooxy)phenyl]prop-2-enoic acid | -3.6604024 | - | - | - | 39.5052  | 277.226266 |
| POS07548 | 3075357.721 | 2869629.153 | -0.09989 | 0.708577 | 0.8578 | 0.15927 | Threote                                                | -23.995909 | - | - | - | 39.5031  | 137.107311 |
| POS07549 | 400136.5327 | 422398.8104 | 0.078113 | 0.808522 | 0.9121 | 0.0725  | 2,6-Dichloro-4'-biphenylol                             | -13.046292 | - | - | - | 39.5031  | 240.101457 |
| POS07550 | 1280417.139 | 912758.0152 | -0.48831 | 0.198935 | 0.5248 | 0.36756 | 2-Deoxy-D-ribose 1-phosphate                           | -0.2113288 | - | - | - | 39.5031  | 215.117631 |
| POS07552 | 107271.5612 | 1346134.149 | 3.649483 | 0.343031 | 0.6329 | 0.48649 | Nitisinone                                             | 7.7494615  | - | - | - | 39.48925 | 330.237928 |
| POS07560 | 474675.3949 | 596806.1976 | 0.330321 | 0.363562 | 0.6446 | 0.23172 | D-Erythroascorbic acid 1'-a-D-glucoside                | -14.694979 | - | - | - | 39.45545 | 309.241447 |

|          |             |             |          |          |        |         |                                                                                          |            |   |   |   |          |            |
|----------|-------------|-------------|----------|----------|--------|---------|------------------------------------------------------------------------------------------|------------|---|---|---|----------|------------|
| POS07561 | 2945500.039 | 2524799.734 | -0.22234 | 0.305278 | 0.6174 | 0.36791 | Methyl 2-propenyl selenide                                                               | -12.001651 | - | - | - | 39.44685 | 136.075656 |
| POS07569 | 454923.2597 | 403259.2894 | -0.17392 | 0.288181 | 0.603  | 0.12864 | (3S,5S,7R,9R,10R)-5,8-epoxy-5,6-dihydro-3',5,8'-trihydroxy-bate-banone                   | 10.989238  | - | - | - | 39.42575 | 617.883656 |
| POS07570 | 384173.8467 | 129763.2908 | -1.56588 | 0.000258 | 0.0721 | 0.50376 | Pentamide                                                                                | 16.651907  | - | - | - | 39.4234  | 102.155861 |
| POS07571 | 2545456.55  | 1982358.939 | -0.36071 | 0.005471 | 0.1556 | 0.67309 | 3-Fluoro-cis,cis-mucote                                                                  | -0.1372238 | - | - | - | 39.4234  | 161.107155 |
| POS07572 | 451449.4488 | 155801.4661 | -1.53486 | 0.005508 | 0.1559 | 0.50095 | L-Amino-4-hydroxy-6-hydroxymethyl-7,8-dihydropteridina                                   | 13.627355  | - | - | - | 39.4234  | 196.188636 |
| POS07573 | 6501.420779 | 14581841.93 | 11.13113 | 0.340125 | 0.6326 | 1.67146 | Bifenox                                                                                  | -2.0718034 | - | - | - | 39.4234  | 343.137568 |
| POS07575 | 1505842.775 | 724025.4423 | -1.05646 | 0.000965 | 0.0736 | 0.87703 | Potassium bicarbote                                                                      | -24.278243 | - | - | - | 39.4221  | 101.119946 |
| POS07581 | 34104.84799 | 659203.0632 | 4.272674 | 0.316603 | 0.6253 | 0.35984 | 4-(N-Maleimido)phenyltrimethylammonium iodide                                            | 16.124945  | - | - | - | 39.4208  | 359.187952 |
| POS07586 | 641424.06   | 458094.4516 | -0.48563 | 0.033911 | 0.2807 | 0.33963 | Calcium peroxide                                                                         | -0.3754775 | - | - | - | 39.3992  | 73.0840495 |
| POS07587 | 434199.5315 | 337397.0591 | -0.36391 | 0.061234 | 0.3403 | 0.22757 | Theophylline                                                                             | -8.733225  | - | - | - | 39.3992  | 181.169703 |
| POS07589 | 519690.2238 | 630993.7064 | 0.279974 | 0.44176  | 0.6978 | 0.18653 | Dihydrostreptomycin 3'alpha,6-bisphosphate                                               | 2.4340769  | - | - | - | 39.3992  | 744.558786 |
| POS07590 | 1003633.29  | 855943.6131 | -0.22964 | 0.345837 | 0.6345 | 0.21237 | Coenzyme F420                                                                            | 7.9441069  | - | - | - | 39.3992  | 774.606022 |
| POS07591 | 575137.1531 | 465100.8439 | -0.30636 | 0.039515 | 0.296  | 0.26226 | D-Hydroxydesacetylvaricin                                                                | 1.3666819  | - | - | - | 39.39755 | 595.87069  |
| POS07593 | 310489.8792 | 204015.0144 | -0.60587 | 0.086931 | 0.3863 | 0.27118 | (((2E)-2-methyl-5-phenylprop-2-en-1-yl)alpha-keto-aminoethyl-delta-N,N-dimethylammonium) | -17.205959 | - | - | - | 39.38825 | 229.263349 |
| POS07600 | 4452068.275 | 2156668.594 | -1.04567 | 0.000772 | 0.0721 | 1.49038 | Dimethylammonium)                                                                        | 11.032849  | - | - | - | 39.38825 | 202.235497 |
| POS07604 | 228446.0134 | 150032.0123 | -0.60658 | 0.0128   | 0.21   | 0.26202 | L-Caline                                                                                 | 10.789887  | - | - | - | 39.3773  | 135.142524 |
| POS07611 | 3094659.015 | 2319303.958 | -0.41609 | 0.057241 | 0.3313 | 0.65351 | [5-(Aminomethyl)furan-3-yl]methyl phosphate                                              | 22.234449  | - | - | - | 39.3773  | 208.132982 |
| POS07612 | 547577.9343 | 216237.389  | -1.34045 | 0.000178 | 0.0721 | 0.5718  | (((2Z)-5-oxo-2-(phenylmethylidene)propylamino)amino)                                     | 18.905059  | - | - | - | 39.3773  | 243.261856 |
| POS07618 | 1438653.875 | 1157356.528 | -0.31389 | 0.005215 | 0.1523 | 0.48071 | L-rixfanyfuro-3-amino-1,2,4-oxadiazepine-3-carboxylic acid                               | 11.37457   | - | - | - | 39.3745  | 160.152387 |
| POS07620 | 1877669.682 | 849759.3668 | -1.14382 | 0.001164 | 0.0803 | 0.99882 | N-Hydroxy-IQ                                                                             | 0.2627589  | - | - | - | 39.3745  | 215.230633 |
| POS07621 | 4025651.244 | 1881720.658 | -1.09717 | 0.000724 | 0.0721 | 1.45096 | Tetrahydrobiopterin                                                                      | 16.809708  | - | - | - | 39.3745  | 242.258432 |
| POS07622 | 1102461.7   | 809907.3216 | -0.4449  | 0.016911 | 0.2275 | 0.43723 | Phosphotyrosine                                                                          | 14.596177  | - | - | - | 39.3745  | 262.179489 |
| POS07623 | 1572725.881 | 751039.368  | -1.06631 | 0.002069 | 0.1021 | 0.87552 | 5-Hydroxysulfamethoxazole                                                                | 19.532089  | - | - | - | 39.3745  | 270.289536 |

|          |             |             |          |          |        |         |                                                         |            |   |   |   |          |            |
|----------|-------------|-------------|----------|----------|--------|---------|---------------------------------------------------------|------------|---|---|---|----------|------------|
| POS07624 | 386027.9105 | 175254.1449 | -1.13926 | 0.000929 | 0.0736 | 0.44961 | 5,5,7-trimethoxy-2-(5-methoxyphenyl)-5H-chroman 5-yl    | 7.4629336  | - | - | - | 39.3745  | 286.284406 |
| POS07636 | 1885380.257 | 1653929.844 | -0.18896 | 0.081747 | 0.378  | 0.36398 | 2,4-Dinitroaniline                                      | 22.961248  | - | - | - | 39.36285 | 184.133081 |
| POS07637 | 357939.1539 | 180055.6572 | -0.99127 | 0.001421 | 0.0864 | 0.41224 | 7-Methylinosine                                         | 3.3117973  | - | - | - | 39.3627  | 284.268815 |
| POS07638 | 615097.2985 | 366659.398  | -0.74637 | 0.002418 | 0.1081 | 0.47417 | L-Amino-4-hydroxy-D-erythro-1,2,3-trihydroxypropyl-7-yl | -1.0273206 | - | - | - | 39.36005 | 256.237614 |
| POS07641 | 20205217.48 | 11160763.15 | -0.85629 | 0.000294 | 0.0721 | 3.00792 | hydroxyphenyl)-1-propanone                              | -15.279641 | - | - | - | 39.36005 | 169.169707 |
| POS07642 | 2358398.804 | 1502252.758 | -0.65068 | 0.001737 | 0.0951 | 0.89985 | 6-Thiourate                                             | 3.6038671  | - | - | - | 39.36005 | 185.18384  |
| POS07645 | 2169201.407 | 1067441.947 | -1.02301 | 0.00095  | 0.0736 | 1.04434 | Niridazole                                              | 10.871255  | - | - | - | 39.36005 | 215.211405 |
| POS07651 | 59076126.79 | 27742215.09 | -1.09049 | 0.000413 | 0.0721 | 5.6032  | Dinitrosopentamethylenetetramine                        | 5.524782   | - | - | - | 39.35935 | 187.180205 |
| POS07653 | 402661.6679 | 270148.7665 | -0.57581 | 0.019878 | 0.238  | 0.31463 | Nebularine                                              | 15.932702  | - | - | - | 39.35935 | 253.237995 |
| POS07658 | 1551867.227 | 2083354.364 | 0.424903 | 0.379629 | 0.6536 | 0.42117 | Vicianose                                               | -16.597893 | - | - | - | 39.34855 | 313.272594 |
| POS07659 | 1376496.532 | 1174270.12  | -0.22924 | 0.046314 | 0.3134 | 0.33344 | 2-C-Methyl-D-erythritol 4-phosphate                     | -2.0632657 | - | - | - | 39.34855 | 217.133131 |
| POS07663 | 2071487.131 | 1358363.05  | -0.6088  | 0.485273 | 0.728  | 0.4405  | Pyrazinoic acid                                         | 20.157342  | - | - | - | 39.3484  | 125.107278 |
| POS07665 | 633834.7898 | 349133.7609 | -0.86033 | 0.004147 | 0.1373 | 0.51584 | Danielone                                               | 11.159251  | - | - | - | 39.3484  | 213.208945 |
| POS07668 | 145092.4453 | 87845.8271  | -0.72393 | 0.012963 | 0.2101 | 0.22093 | (3S)-3-Hydroxy-L-enduracididine                         | 21.180376  | - | - | - | 39.3481  | 189.195762 |
| POS07671 | 1699847.116 | 1832625.173 | 0.108507 | 0.695944 | 0.8501 | 0.14969 | 5,4,2-trimethoxy-6-(1,2-hydroxyethyl)-2                 | -17.183805 | - | - | - | 39.3477  | 311.256945 |
| POS07672 | 349145.0074 | 196450.3413 | -0.82966 | 0.006    | 0.1639 | 0.34881 | Creatinine                                              | 21.515013  | - | - | - | 39.34755 | 114.12761  |
| POS07674 | 6062619.584 | 3620271.85  | -0.74384 | 0.000872 | 0.0734 | 1.53254 | Sepiapterin                                             | 19.566937  | - | - | - | 39.347   | 238.227218 |
| POS07679 | 3168361.513 | 1865733.17  | -0.76399 | 0.000767 | 0.0721 | 1.12406 | 5-O-Methyl-myo-inositol                                 | -22.906262 | - | - | - | 39.347   | 195.185329 |
| POS07681 | 196788.2375 | 154483.5533 | -0.34919 | 0.484534 | 0.7272 | 0.09621 | Mecarphon                                               | 14.227728  | - | - | - | 39.347   | 272.305236 |
| POS07693 | 6893126.528 | 3328897.677 | -1.05011 | 0.000538 | 0.0721 | 1.87258 | 2-Amino-5-(5-nitro-2-furyl)-1,3,4-thiadiazole           | 11.602853  | - | - | - | 39.3449  | 213.195739 |
| POS07694 | 10986698.57 | 5386473.522 | -1.02834 | 0.00052  | 0.0721 | 2.35697 | 2-Aminophenoxazin-3-one                                 | 16.907073  | - | - | - | 39.3449  | 213.214964 |
| POS07695 | 39534922.7  | 16198577.03 | -1.28726 | 0.000403 | 0.0721 | 4.82701 | Dihydrobiopterin                                        | 18.264955  | - | - | - | 39.3449  | 240.242846 |
| POS07698 | 141317.1747 | 64508.12189 | -1.13138 | 0.005896 | 0.1617 | 0.24951 | Disperse Blue 1                                         | -2.670246  | - | - | - | 39.3434  | 269.27726  |

|          |             |             |          |          |        |         |                                                                       |            |   |   |   |          |            |
|----------|-------------|-------------|----------|----------|--------|---------|-----------------------------------------------------------------------|------------|---|---|---|----------|------------|
| POS07700 | 340182.5079 | 185243.7445 | -0.87688 | 0.005682 | 0.1571 | 0.36403 | 5-Methyl-3-isoxazolyl sulfate                                         | 18.847195  | - | - | - | 39.3429  | 180.161853 |
| POS07701 | 1424317.856 | 1242682.321 | -0.19681 | 0.047117 | 0.3141 | 0.30271 | 5-Hydroxy-2-methylpyridine-4,5-dicarboxylate                          | -18.134162 | - | - | - | 39.34285 | 198.148602 |
| POS07703 | 716454.0439 | 438447.6436 | -0.70847 | 0.005092 | 0.1518 | 0.49832 | Vicine                                                                | 16.511881  | - | - | - | 39.3428  | 305.2689   |
| POS07706 | 317481.2686 | 267995.0801 | -0.24446 | 0.303292 | 0.6157 | 0.13044 | Neopterin                                                             | 0.0898745  | - | - | - | 39.3428  | 254.221999 |
| POS07707 | 558213.5551 | 489877.6185 | -0.1884  | 0.155246 | 0.4838 | 0.18221 | Pancuronium                                                           | -19.600812 | - | - | - | 39.3428  | 573.857948 |
| POS07709 | 1365373.059 | 1028205.422 | -0.40917 | 0.001803 | 0.0964 | 0.54586 | Phosphoagmatine                                                       | 6.2973251  | - | - | - | 39.34275 | 211.18     |
| POS07710 | 1087461.218 | 681564.1706 | -0.67404 | 0.001982 | 0.0995 | 0.62168 | 6-Succinoaminopurine                                                  | 20.383199  | - | - | - | 39.34275 | 236.211571 |
| POS07713 | 514240.2649 | 369036.7503 | -0.47868 | 0.250864 | 0.5689 | 0.27132 | SQ 26180                                                              | 20.236075  | - | - | - | 39.3427  | 239.230497 |
| POS07725 | 404345.3529 | 276330.3037 | -0.54919 | 0.026299 | 0.2576 | 0.30521 | Fluconazole                                                           | 21.147839  | - | - | - | 39.341   | 307.284554 |
| POS07726 | 416004.9403 | 411726.3039 | -0.01492 | 0.962146 | 0.9827 | 0.0449  | Glyphosate-isopropylammonium                                          | -0.4450839 | - | - | - | 39.3404  | 229.190475 |
| POS07727 | 293451.7566 | 731125.9052 | 1.316997 | 0.454036 | 0.7077 | 0.36247 | Guanine                                                               | -17.882805 | - | - | - | 39.3404  | 152.130674 |
| POS07728 | 790100.4778 | 348070.1616 | -1.18266 | 0.000278 | 0.0721 | 0.66833 | Omethoate                                                             | -0.2749548 | - | - | - | 39.3402  | 214.199018 |
| POS07729 | 855799.6237 | 477473.5341 | -0.84185 | 0.002479 | 0.1088 | 0.58021 | Indicaxanthin                                                         | 20.531811  | - | - | - | 39.3402  | 309.300206 |
| POS07738 | 582113.9503 | 300793.0034 | -0.95253 | 0.013649 | 0.2159 | 0.46668 | 2-([5,7-dimethoxy-2-(5-hydroxyphenyl)-5H-chromen-3-yl]oxy)acetic acid | 7.0827265  | - | - | - | 39.337   | 404.373134 |
| POS07742 | 211132.1058 | 142331.2907 | -0.56889 | 0.316331 | 0.6253 | 0.15066 | Ethalfuralin                                                          | 7.1223264  | - | - | - | 39.3215  | 334.27285  |
| POS07744 | 148461.2191 | 128268.8388 | -0.21092 | 0.501324 | 0.7379 | 0.06369 | SN38 glucuronide carboxylate form                                     | -8.5597276 | - | - | - | 39.3209  | 586.538365 |
| POS07746 | 764996.113  | 483970.4169 | -0.66053 | 0.006114 | 0.1646 | 0.49594 | Taxifolin                                                             | -2.7716704 | - | - | - | 39.3094  | 305.258033 |
| POS07750 | 795271.1685 | 624598.531  | -0.34852 | 0.133828 | 0.4541 | 0.2586  | Lormetazepam                                                          | 6.5609377  | - | - | - | 39.28135 | 336.194476 |
| POS07753 | 821318.6712 | 652120.2114 | -0.3328  | 0.398356 | 0.6673 | 0.25425 | L-Asp(4-L-Arg)                                                        | -1.0036333 | - | - | - | 39.28135 | 290.295386 |
| POS07754 | 189499.55   | 98856.01843 | -0.93879 | 0.357072 | 0.6405 | 0.17945 | UDP-L-Ara4N                                                           | 11.418431  | - | - | - | 39.2745  | 536.304389 |
| POS07758 | 1252144.301 | 1215537.184 | -0.04281 | 0.968161 | 0.9856 | 0.15954 | Phosmet                                                               | -5.0931431 | - | - | - | 39.264   | 318.32666  |
| POS07759 | 165024.4641 | 59385.77662 | -1.47449 | 0.007974 | 0.1842 | 0.28848 | Dihydroxycarbazepine                                                  | 8.6222119  | - | - | - | 39.2617  | 271.292907 |
| POS07760 | 379274.3238 | 590471.2244 | 0.638625 | 0.42502  | 0.6851 | 0.28788 | Robustine                                                             | 12.485287  | - | - | - | 39.2454  | 216.214763 |

|          |             |             |          |          |        |         |                                                                               |            |   |   |   |          |            |
|----------|-------------|-------------|----------|----------|--------|---------|-------------------------------------------------------------------------------|------------|---|---|---|----------|------------|
| POS07761 | 1777983.849 | 195601.9963 | -3.18425 | 0.312782 | 0.6229 | 0.68461 | Methacrifos                                                                   | 23.711912  | - | - | - | 39.22725 | 241.226873 |
| POS07762 | 1671798.559 | 1306719.943 | -0.35545 | 0.043392 | 0.3066 | 0.4538  | N-Acetyldemethylphosphinot<br>bacin                                           | 20.881524  | - | - | - | 39.2265  | 210.148544 |
| POS07765 | 3010491.806 | 2431866.5   | -0.30794 | 0.049402 | 0.3185 | 0.59194 | N-Dimethyl-2-<br>aminoethylphosphote                                          | -9.7509363 | - | - | - | 39.2095  | 154.122484 |
| POS07768 | 211071.0259 | 196157.9207 | -0.10571 | 0.813208 | 0.9151 | 0.01572 | Lumichrome                                                                    | 7.7319524  | - | - | - | 39.1926  | 243.24255  |
| POS07771 | 24276037.6  | 17636418.45 | -0.46098 | 0.005354 | 0.1543 | 2.30734 | Calcium hydroxide                                                             | -3.9031645 | - | - | - | 39.1853  | 75.0996874 |
| POS07774 | 116225.3103 | 381053.313  | 1.713069 | 0.234384 | 0.5554 | 0.31981 | Auranofin                                                                     | -12.632597 | - | - | - | 39.1853  | 679.478706 |
| POS07775 | 164626.2324 | 74429.16578 | -1.14525 | 0.003723 | 0.1314 | 0.27721 | Dyphylline                                                                    | 14.752613  | - | - | - | 39.1807  | 255.253627 |
| POS07778 | 975435.0888 | 626690.3169 | -0.63829 | 0.014997 | 0.2222 | 0.51662 | N,N'-dinitrosopiperazine                                                      | 16.385488  | - | - | - | 39.16755 | 145.141538 |
| POS07780 | 80284.66815 | 70959.2598  | -0.17813 | 0.691693 | 0.8473 | 0.02098 | Amaroswerin                                                                   | 10.82919   | - | - | - | 39.1499  | 603.553902 |
| POS07781 | 795305.4013 | 386949.7185 | -1.03936 | 0.495012 | 0.7341 | 0.27065 | N-Benzoylanthranilate                                                         | 1.3924523  | - | - | - | 39.1498  | 242.249613 |
| POS07787 | 4348793.995 | 3034336.977 | -0.51923 | 0.204316 | 0.5278 | 0.79448 | N(beta)-Epoxysuccimoyl-<br>DAP-Val                                            | 18.039739  | - | - | - | 39.1329  | 317.323383 |
| POS07790 | 22609744.38 | 15977010.36 | -0.50095 | 0.233983 | 0.555  | 1.73841 | Hippeastrine                                                                  | -24.779856 | - | - | - | 39.1329  | 316.320063 |
| POS07792 | 290764.838  | 127572.0835 | -1.18854 | 0.114439 | 0.4282 | 0.27704 | {2-[3,5-dinitroxy-4-<br>(sulfooxy)phenyl]-3-<br>hydroxy-5-oxo-5H              | 5.6813723  | - | - | - | 39.12815 | 384.309454 |
| POS07794 | 83802.47329 | 52416.63073 | -0.67697 | 0.024409 | 0.2524 | 0.14568 | Olsalazine                                                                    | 23.358902  | - | - | - | 39.12355 | 303.253337 |
| POS07795 | 115137.2939 | 88816.03399 | -0.37446 | 0.338303 | 0.6326 | 0.10439 | Leucodelphinidin                                                              | 15.70676   | - | - | - | 39.1116  | 323.279238 |
| POS07796 | 1132289.897 | 950242.0806 | -0.25288 | 0.770764 | 0.8941 | 0.09168 | L-2-Amino-3,4-<br>dihydroxypentanedioic<br>acid                               | 14.986017  | - | - | - | 39.1116  | 180.138061 |
| POS07800 | 1304950.803 | 972449.3617 | -0.4243  | 0.013924 | 0.2168 | 0.51665 | Quite                                                                         | -22.174694 | - | - | - | 39.1125  | 193.169615 |
| POS07801 | 512301.8907 | 518621.0923 | 0.017687 | 0.969362 | 0.9861 | 0.00604 | Triphenyl phosphate                                                           | -6.3124341 | - | - | - | 39.1125  | 327.288317 |
| POS07802 | 439292.7871 | 236194.1546 | -0.89521 | 0.16892  | 0.4949 | 0.28404 | Nedocromil                                                                    | -5.9518692 | - | - | - | 39.1125  | 372.345866 |
| POS07806 | 48482.7034  | 5570990.591 | 6.84432  | 0.340012 | 0.6326 | 1.02908 | Flurochloridone                                                               | 15.173404  | - | - | - | 39.109   | 313.127112 |
| POS07809 | 1687355.881 | 1181607.979 | -0.51401 | 0.035031 | 0.2838 | 0.59059 | L-2-Amino-4-oxo-6-(1,2-<br>dioxopropyl)-7,8-<br>dihydroxypentanedioic<br>acid | 20.927988  | - | - | - | 39.109   | 268.211169 |
| POS07812 | 3175824.672 | 1798992.812 | -0.81994 | 0.009921 | 0.194  | 1.07143 | 1,3,7-Trimethyluric acid                                                      | 10.34661   | - | - | - | 39.1061  | 211.199451 |
| POS07813 | 189809.3483 | 95908.99683 | -0.98481 | 0.011608 | 0.2019 | 0.2672  | 4a-<br>Hydroxytetrahydrobiopteri<br>n                                         | -2.4804014 | - | - | - | 39.1061  | 258.253139 |

|          |             |             |          |          |        |         |                                                            |            |   |   |   |          |            |
|----------|-------------|-------------|----------|----------|--------|---------|------------------------------------------------------------|------------|---|---|---|----------|------------|
| POS07815 | 454296.1642 | 298804.3895 | -0.60443 | 0.107637 | 0.4173 | 0.26858 | Nedaplatin                                                 | 6.8435614  | - | - | - | 39.1022  | 304.189851 |
| POS07820 | 247664.5419 | 179818.0887 | -0.46185 | 0.098689 | 0.4049 | 0.20345 | TG(15:0/20:4(5Z,8Z,11Z,14Z)/24:1(15Z))                     | 10.633342  | - | - | - | 39.09285 | 952.573395 |
| POS07824 | 197846.9388 | 329324.5133 | 0.735125 | 0.477601 | 0.7223 | 0.11915 | PQQ                                                        | -14.564882 | - | - | - | 39.0835  | 331.208467 |
| POS07828 | 947751.5016 | 852499.0808 | -0.15281 | 0.439789 | 0.6968 | 0.17493 | DL-4-amino-4,6-dideoxy-5-C-methyl-D-mannose                | -12.825351 | - | - | - | 39.0726  | 590.424217 |
| POS07833 | 1211737.319 | 2061651.777 | 0.766724 | 0.483809 | 0.7265 | 0.3172  | Trans-urocanate                                            | 10.260679  | - | - | - | 39.0617  | 138.127684 |
| POS07835 | 1503166.075 | 1550727.397 | 0.044941 | 0.842202 | 0.9279 | 0.10892 | Calcium glycerophosphate                                   | 3.3054875  | - | - | - | 39.061   | 211.143771 |
| POS07836 | 3722652.915 | 2275198.583 | -0.71034 | 0.008897 | 0.1917 | 1.02447 | p-Benzoquinone                                             | -8.4582987 | - | - | - | 39.0566  | 109.101162 |
| POS07844 | 194429.3466 | 61515.34129 | -1.66023 | 0.282259 | 0.5981 | 0.19809 | ringenin 7-O-beta-D-glucoside                              | -17.368071 | - | - | - | 39.0315  | 435.393132 |
| POS07847 | 1663205.276 | 809585.4486 | -1.03871 | 0.000588 | 0.0721 | 0.921   | Desacetyl-nitazoxanide                                     | 22.383639  | - | - | - | 39.03105 | 266.258214 |
| POS07849 | 1434518.474 | 1048948.463 | -0.45162 | 0.013482 | 0.2149 | 0.56238 | Cytosine                                                   | 23.822552  | - | - | - | 39.0309  | 112.111923 |
| POS07851 | 1542483.743 | 1328390.57  | -0.21558 | 0.445622 | 0.7007 | 0.21499 | Clavulanic acid                                            | -19.211351 | - | - | - | 39.03005 | 200.16425  |
| POS07854 | 457355.0987 | 512717.2767 | 0.164849 | 0.676783 | 0.8402 | 0.11946 | Bromodiphenhydramine                                       | -3.720037  | - | - | - | 39.0286  | 335.257033 |
| POS07857 | 350500.7892 | 293305.8699 | -0.25701 | 0.76122  | 0.8886 | 0.09862 | Xanthopterin-B2                                            | 16.294541  | - | - | - | 39.0231  | 239.211258 |
| POS07858 | 546611.6398 | 381358.5112 | -0.51937 | 0.207987 | 0.532  | 0.27526 | Propyzamide                                                | 1.7010988  | - | - | - | 39.0228  | 257.135512 |
| POS07862 | 95301.70845 | 327835.949  | 1.7824   | 0.271231 | 0.5886 | 0.24055 | Trifluralin                                                | 6.821754   | - | - | - | 39.02265 | 336.288664 |
| POS07863 | 967141.4052 | 374895.6616 | -1.36724 | 0.197593 | 0.5233 | 0.48577 | 5,4,3-trimethoxy-6-(4-hydroxy-1H-indole-3-carboxyl)oxane 2 | 24.673743  | - | - | - | 39.02195 | 354.298993 |
| POS07864 | 468278.8607 | 603725.5337 | 0.366525 | 0.713443 | 0.8606 | 0.14707 | Pyrimidine nucleoside                                      | 3.3205677  | - | - | - | 39.01955 | 214.218485 |
| POS07866 | 538128.9933 | 531573.1332 | -0.01768 | 0.964346 | 0.9834 | 0.03777 | Irisxanthone                                               | -2.3361949 | - | - | - | 39.0147  | 437.372457 |
| POS07870 | 617721.6473 | 237042.0767 | -1.38181 | 0.104715 | 0.4117 | 0.43759 | 2-Pyrone-4,6-dicarboxylate                                 | -17.881531 | - | - | - | 38.9962  | 185.107085 |
| POS07871 | 748361.4151 | 301920.9902 | -1.30956 | 0.277236 | 0.5932 | 0.36845 | (1E,3E)-4-Hydroxybuta-1,3-diene-1,2,4-tricarboxylate       | 8.8913166  | - | - | - | 38.9866  | 203.127374 |
| POS07873 | 9960443.524 | 7288363.943 | -0.45061 | 0.064744 | 0.3459 | 1.31697 | 2,4-dihydroxy-3-(sulfooxy)benzoic acid                     | -10.353244 | - | - | - | 38.96175 | 251.184686 |
| POS07874 | 236394.0834 | 261228.7271 | 0.14412  | 0.521489 | 0.7515 | 0.04605 | Selenomethionine Selenoxide                                | -15.859338 | - | - | - | 38.95765 | 213.109613 |
| POS07875 | 1634676.406 | 6997720.151 | 2.09788  | 0.376312 | 0.6512 | 0.95202 | 3,5-Dichloro-L-tyrosine                                    | 19.265339  | - | - | - | 38.94575 | 251.090794 |

|          |             |             |          |          |        |         |                                                                                                                                                                             |            |   |   |   |          |            |
|----------|-------------|-------------|----------|----------|--------|---------|-----------------------------------------------------------------------------------------------------------------------------------------------------------------------------|------------|---|---|---|----------|------------|
| POS07879 | 46487.09498 | 49001.23969 | 0.075988 | 0.858324 | 0.9354 | 0.02113 | Bay-K-8644                                                                                                                                                                  | 17.437264  | - | - | - | 38.9137  | 357.309989 |
| POS07880 | 49191124.62 | 22443126.22 | -1.13212 | 0.000525 | 0.0721 | 5.14773 | Deoxyvasicinone                                                                                                                                                             | -3.0381704 | - | - | - | 38.9133  | 187.216611 |
| POS07889 | 9973.420899 | 23584.15042 | 1.241657 | 0.214568 | 0.5366 | 0.0875  | N,N'-Diacetylchitobiose<br>6'-phosphate                                                                                                                                     | 0.1365533  | - | - | - | 38.82415 | 505.387545 |
| POS07891 | 178034.8072 | 170548.8204 | -0.06197 | 0.932723 | 0.9693 | 0.00092 | [1-(o,7-dimethoxy-2H-1,3-<br>benzodioxol-5-yl)-3-<br>oxo-2-oxo-1,2,4-triazole-5-ylidene]-6'-<br>[xylosyl-(1-&gt;6)-<br>beta-D-glucopyranoside]                              | 24.398484  | - | - | - | 38.7992  | 335.315433 |
| POS07894 | 65057.29894 | 77795.91188 | 0.257983 | 0.792702 | 0.9047 | 0.05454 | [xylosyl-(1-&gt;6)-<br>beta-D-glucopyranoside]                                                                                                                              | -13.923939 | - | - | - | 38.7886  | 491.455548 |
| POS07898 | 16175036.56 | 5534510.451 | -1.54724 | 0.358272 | 0.6416 | 2.12749 | Carboxymethoxymethylgu<br>anine                                                                                                                                             | -0.6581917 | - | - | - | 38.7717  | 240.195319 |
| POS07902 | 137897.1811 | 80829.63318 | -0.77064 | 0.015862 | 0.2226 | 0.22127 | 8-Oxodeoxycoformycin                                                                                                                                                        | 3.908286   | - | - | - | 38.7535  | 267.261617 |
| POS07906 | 956120.0382 | 873952.8473 | -0.12964 | 0.447446 | 0.7021 | 0.1325  | Stipitate                                                                                                                                                                   | 2.173374   | - | - | - | 38.7176  | 183.137872 |
| POS07909 | 390517.7685 | 276089.1659 | -0.50025 | 0.421073 | 0.682  | 0.20975 | 5-[5-hydroxy-5-methoxy-<br>4-(sulfooxy)phenyl]prop-<br>2-enoic acid                                                                                                         | -17.334778 | - | - | - | 38.7171  | 291.242245 |
| POS07914 | 237039.6175 | 320887.0817 | 0.436938 | 0.16142  | 0.4889 | 0.19006 | Corilagin                                                                                                                                                                   | -12.459172 | - | - | - | 38.7072  | 635.452172 |
| POS07915 | 216737.0578 | 119429.9817 | -0.85978 | 0.089523 | 0.3895 | 0.22069 | Prodiamine                                                                                                                                                                  | 24.494556  | - | - | - | 38.7058  | 351.309557 |
| POS07916 | 752471.174  | 579167.4919 | -0.37766 | 0.152049 | 0.4792 | 0.28251 | (4-{1-[5,5-dimethoxy-4-<br>(sulfooxy)phenyl]-6,11-<br>[2,4-dihydroxy-4,7,8,<br>12-tetrahydroxy-4H-1,4-<br>trihydroxy-5H-chromen-2-<br>yl]phenyl}oxy)benzenesulfonic<br>acid | 18.386279  | - | - | - | 38.70485 | 528.496975 |
| POS07919 | 196371.7287 | 136151.3334 | -0.52838 | 0.310408 | 0.6217 | 0.13312 | trihydroxy-5H-chromen-2-<br>yl]phenyl}oxy)benzenesulfonic<br>acid                                                                                                           | -18.826215 | - | - | - | 38.6998  | 382.330098 |
| POS07920 | 418773.051  | 298943.3362 | -0.4863  | 0.024778 | 0.2538 | 0.28816 | Melizame                                                                                                                                                                    | -7.1737807 | - | - | - | 38.68265 | 179.154099 |
| POS07921 | 218761.444  | 154369.2114 | -0.50297 | 0.318449 | 0.6268 | 0.12229 | Dichlofluanid                                                                                                                                                               | -3.9243114 | - | - | - | 38.6795  | 334.236169 |
| POS07924 | 1274470.472 | 1052769.001 | -0.27571 | 0.284702 | 0.6008 | 0.29561 | 5-fluorocyclohexanone-<br>cis,cis-1,2-diol-1-<br>carboxylate                                                                                                                | -5.886435  | - | - | - | 38.63585 | 175.132752 |
| POS07925 | 1081204.701 | 741837.5199 | -0.54346 | 0.087213 | 0.3863 | 0.46129 | Aminomalote                                                                                                                                                                 | -22.294786 | - | - | - | 38.6141  | 120.080722 |
| POS07930 | 2114519.136 | 3014941.832 | 0.511801 | 0.472494 | 0.7195 | 0.32007 | 3-Bromo-2Z-heptenoic<br>acid                                                                                                                                                | -19.807702 | - | - | - | 38.5443  | 208.068175 |
| POS07933 | 58404.65998 | 38423.54295 | -0.60409 | 0.529016 | 0.7568 | 0.05368 | 0-(2-((1Z)-2-(2,4-<br>dihydroxyphenyl)prop-2-<br>enyl)oxy)benzoic acid                                                                                                      | -20.239833 | - | - | - | 38.5368  | 513.416905 |
| POS07936 | 593621.3838 | 448202.3094 | -0.40539 | 0.46148  | 0.712  | 0.19992 | 2-hydroxy-3-<br>(sulfooxy)butanedioic acid                                                                                                                                  | 7.0348671  | - | - | - | 38.5293  | 231.148896 |
| POS07948 | 968418.824  | 804828.4843 | -0.26695 | 0.047273 | 0.3142 | 0.31363 | D-Glucono-1,5-lactone                                                                                                                                                       | -24.883484 | - | - | - | 38.4134  | 179.142844 |
| POS07949 | 200815.5004 | 220303.8443 | 0.133624 | 0.756836 | 0.887  | 0.03518 | rciclasine                                                                                                                                                                  | -17.222253 | - | - | - | 38.40935 | 308.257485 |
| POS07957 | 875280.7543 | 239520.5637 | -1.8696  | 0.173866 | 0.5001 | 0.47999 | 2-hydroxy-4-<br>trifluoromethyl benzoic<br>acid                                                                                                                             | -18.084662 | - | - | - | 38.39225 | 207.122249 |





|          |             |             |          |          |        |         |  |                                                                                 |            |   |   |   |          |            |
|----------|-------------|-------------|----------|----------|--------|---------|--|---------------------------------------------------------------------------------|------------|---|---|---|----------|------------|
| POS08014 | 505131.7706 | 482044.4712 | -0.06749 | 0.794862 | 0.9059 | 0.02109 |  | Pelargonidin 3-O-rutinoside                                                     | -9.2481946 | - | - | - | 38.0604  | 580.528517 |
| POS08015 | 1289197.249 | 922454.1587 | -0.48292 | 0.189897 | 0.5169 | 0.37242 |  | Chlorfenprop-methyl                                                             | -17.445492 | - | - | - | 38.0604  | 234.09441  |
| POS08016 | 1512518.432 | 1107290.571 | -0.44992 | 0.178836 | 0.5052 | 0.41135 |  | Isosorbide dinitrate                                                            | -22.870793 | - | - | - | 38.0359  | 237.138176 |
| POS08017 | 1           | 480219.1833 | 18.87333 | 0.340893 | 0.6326 | 0.303   |  | ATP                                                                             | -17.119447 | - | - | - | 38.0236  | 508.179594 |
| POS08020 | 366655.2039 | 225843.3841 | -0.6991  | 0.216229 | 0.5379 | 0.22341 |  | {14-(1-methoxy-2-oxo-2H-chromen-6-yl)-2-oxobut-3-en-1-yl}sulfonyl sulfonic acid | 20.46107   | - | - | - | 37.9925  | 341.31424  |
| POS08021 | 801487.3092 | 700677.0672 | -0.19393 | 0.310772 | 0.6218 | 0.17047 |  | (R)-5-Phosphomevalate                                                           | -14.33316  | - | - | - | 37.9629  | 229.141007 |
| POS08026 | 192799.2926 | 156284.5521 | -0.30292 | 0.3501   | 0.6362 | 0.10474 |  | 0,11-unnuroxy-3-meunyl-7-(3,4,5-trihydroxyphenyl) 28                            | -6.411271  | - | - | - | 37.9461  | 342.299088 |
| POS08032 | 1378169.821 | 1746018.048 | 0.341315 | 0.490368 | 0.7313 | 0.31957 |  | Bromobutide                                                                     | 10.796125  | - | - | - | 37.8912  | 313.255948 |
| POS08034 | 41157.76244 | 53950.16608 | 0.390463 | 0.378833 | 0.653  | 0.07287 |  | (2-nyaroxy-2-(9-nyaroxy-7-oxo-2H,3H,7H-furo[3,2-                                | -5.6520273 | - | - | - | 37.8912  | 359.325251 |
| POS08040 | 408643.6292 | 310434.3095 | -0.39656 | 0.366365 | 0.646  | 0.15172 |  | <sup>14</sup> N-Acetyl-L-2-glucosaminyl diphosphod                              | -15.453052 | - | - | - | 37.8648  | 588.532697 |
| POS08047 | 338804.3359 | 1088879.887 | 1.684321 | 0.331569 | 0.6326 | 0.38473 |  | 2,6-Dichloroindophenol                                                          | -4.8286336 | - | - | - | 37.8424  | 269.101482 |
| POS08049 | 349893.535  | 287287.0574 | -0.28442 | 0.488627 | 0.73   | 0.09477 |  | 2-(1(2,4-unnuroxy-3-methoxyphenyl)(hydroxy) methylidene)amino)acetic            | 20.7994    | - | - | - | 37.8384  | 242.211293 |
| POS08050 | 308455.2723 | 336737.5903 | 0.126563 | 0.883507 | 0.9474 | 0.06655 |  | C.I. Acid red 33                                                                | -6.7255105 | - | - | - | 37.8384  | 468.388133 |
| POS08053 | 378413.9797 | 243038.9768 | -0.63878 | 0.454265 | 0.7079 | 0.21299 |  | Pyridoxal phosphate                                                             | -24.597551 | - | - | - | 37.81075 | 248.143098 |
| POS08055 | 657938.8623 | 448550.4099 | -0.55268 | 0.549499 | 0.769  | 0.20701 |  | Morfamquat                                                                      | -7.5399461 | - | - | - | 37.7987  | 540.497609 |
| POS08058 | 3582161.212 | 1714402.412 | -1.06312 | 0.203133 | 0.5274 | 0.93812 |  | 3-Sulfomucote                                                                   | 0.8609298  | - | - | - | 37.7881  | 223.180068 |
| POS08066 | 283578.4875 | 227803.8846 | -0.31596 | 0.418022 | 0.6797 | 0.12417 |  | Endalin                                                                         | -19.494605 | - | - | - | 37.7624  | 230.211108 |
| POS08068 | 17383051.71 | 9993941.594 | -0.79856 | 0.224396 | 0.5461 | 1.55908 |  | Thioguanosine 5'-diphosphate                                                    | -11.763759 | - | - | - | 37.7618  | 460.267874 |
| POS08071 | 2011024.785 | 1580456.743 | -0.34759 | 0.054904 | 0.3269 | 0.48399 |  | 5'-Hydroxystreptomycin                                                          | -9.7465483 | - | - | - | 37.7612  | 598.574952 |
| POS08072 | 475126.292  | 296558.8284 | -0.67999 | 0.105025 | 0.412  | 0.32673 |  | 5'-Phosphoribosylglycimide                                                      | -4.7171667 | - | - | - | 37.7612  | 287.182327 |
| POS08073 | 513435.1362 | 211488.6125 | -1.2796  | 0.10187  | 0.4083 | 0.37579 |  | 2,5-DIKETO-3-methylthiopentyl-1-phosphata                                       | 3.6205802  | - | - | - | 37.7608  | 243.194853 |
| POS08074 | 1           | 276698.1042 | 18.07795 | 0.340893 | 0.6326 | 0.23    |  | Silver sulfadiazine                                                             | -24.333479 | - | - | - | 37.7608  | 358.135586 |
| POS08075 | 731261.4249 | 648639.0355 | -0.17297 | 0.465303 | 0.7147 | 0.12927 |  | 10-Acetoxyiligustroside                                                         | -19.134293 | - | - | - | 37.7607  | 583.54663  |

|          |             |             |          |          |        |         |                                                                                                    |            |   |   |   |          |            |
|----------|-------------|-------------|----------|----------|--------|---------|----------------------------------------------------------------------------------------------------|------------|---|---|---|----------|------------|
| POS08078 | 555170.5569 | 522376.5566 | -0.08784 | 0.680636 | 0.8427 | 0.05978 | SN38 glucuronide                                                                                   | -8.3299133 | - | - | - | 37.7601  | 569.531241 |
| POS08079 | 134647.3179 | 129260.3522 | -0.05891 | 0.891566 | 0.9503 | 0.0158  | N-Amidino-L-aspartate                                                                              | 7.933216   | - | - | - | 37.759   | 176.151366 |
| POS08080 | 4681853.911 | 2726302.081 | -0.78013 | 0.230059 | 0.5513 | 0.79477 | CDP-N-methylethanolamine                                                                           | -14.93909  | - | - | - | 37.759   | 461.271201 |
| POS08081 | 1352265.311 | 1086900.506 | -0.31516 | 0.119523 | 0.4348 | 0.32837 | L-methionyl-D-thiopyroxy-5-formylpyridine-4-carboxylate                                            | 6.3992039  | - | - | - | 37.7586  | 182.153936 |
| POS08083 | 529509.7258 | 472835.0038 | -0.16332 | 0.373374 | 0.6502 | 0.12025 | sn-Glycero-3-phospho-1-inositol                                                                    | -2.4703795 | - | - | - | 37.7586  | 335.220751 |
| POS08084 | 1033552.124 | 667268.874  | -0.63127 | 0.07462  | 0.3661 | 0.45416 | 3-Carboxy-cis,cis-mucote                                                                           | -18.761588 | - | - | - | 37.7574  | 187.122685 |
| POS08087 | 445069.5836 | 385271.0687 | -0.20816 | 0.352166 | 0.6364 | 0.11643 | Sulbactam sodium                                                                                   | -16.178246 | - | - | - | 37.741   | 256.226648 |
| POS08092 | 53903.87302 | 70132.87496 | 0.379702 | 0.321352 | 0.6288 | 0.08769 | 2-Decarboxybetanin                                                                                 | -6.978683  | - | - | - | 37.68805 | 508.471035 |
| POS08094 | 990506.8796 | 772251.9896 | -0.3591  | 0.053171 | 0.3235 | 0.36969 | 4-Carboxy-4-hydroxy-2-oxoadipate                                                                   | -13.512222 | - | - | - | 37.672   | 221.137902 |
| POS08095 | 324975.3696 | 263904.804  | -0.30031 | 0.237803 | 0.5574 | 0.14261 | Deoxy-5-methylcytidylate                                                                           | 18.185846  | - | - | - | 37.6668  | 322.236818 |
| POS08098 | 339693.5384 | 200277.7426 | -0.76223 | 0.107833 | 0.4177 | 0.24306 | Decarbamoylgonyauxotin I                                                                           | 11.536131  | - | - | - | 37.6491  | 369.335226 |
| POS08100 | 318135.5609 | 229142.2682 | -0.4734  | 0.077226 | 0.371  | 0.24682 | Se-Methylselenomethionine                                                                          | -4.3407129 | - | - | - | 37.6171  | 212.14726  |
| POS08104 | 909240.9772 | 275338.2582 | -1.72346 | 0.269187 | 0.5861 | 0.5386  | 2,4'-Dichlorobiphenyl                                                                              | 6.6149222  | - | - | - | 37.5981  | 224.106652 |
| POS08108 | 381393.1882 | 208195.1811 | -0.87334 | 0.157112 | 0.4855 | 0.26012 | U50488                                                                                             | -14.404065 | - | - | - | 37.5653  | 370.330457 |
| POS08110 | 2745888.637 | 1693652.344 | -0.69714 | 0.030155 | 0.2685 | 0.82783 | Panfuran S                                                                                         | -2.5543006 | - | - | - | 37.545   | 294.242028 |
| POS08113 | 40616.88374 | 28573.37654 | -0.50741 | 0.342451 | 0.6327 | 0.05877 | 1,2-diphenyl-3-bromo-1,1,1-trifluoro-4-hydroxypropan-2-ylidene-3,3,3-trifluoro-2-hydroxypropanoate | -7.2399644 | - | - | - | 37.53555 | 410.361513 |
| POS08114 | 139779.4359 | 143591.6949 | 0.03882  | 0.910575 | 0.9581 | 0.02768 | o-((4-ethyl-3-(sulfoxy)phenyl)-3,5-dihydroxy-2,4-dihydroxy-TG(14:0/20:3(5Z,8Z,11Z)/14:0))          | -0.0145098 | - | - | - | 37.5247  | 559.517268 |
| POS08117 | 1           | 1369822.997 | 20.38556 | 0.340893 | 0.6326 | 0.51175 | TG(14:0/20:3(5Z,8Z,11Z)/14:0)                                                                      | 10.653251  | - | - | - | 37.5247  | 802.288413 |
| POS08121 | 1297122.714 | 985059.4982 | -0.39703 | 0.034066 | 0.2814 | 0.419   | [(1S)-1,2,3-trihydroxy-2-(4-oxocyclohexa-2,5-dien-1-ylidene)propanoic acid]                        | 14.004956  | - | - | - | 37.51305 | 610.574813 |
| POS08127 | 878987.6815 | 460008.1304 | -0.93418 | 0.02259  | 0.2473 | 0.52266 | Lamivudine-monophosphate                                                                           | -20.676554 | - | - | - | 37.5014  | 310.236883 |
| POS08129 | 5446483.671 | 3659839.766 | -0.57354 | 0.027943 | 0.2623 | 1.14941 | Tulobuterol hydrochloride                                                                          | 6.447721   | - | - | - | 37.49975 | 265.20038  |
| POS08130 | 1704239.478 | 1488663.605 | -0.19511 | 0.209841 | 0.5333 | 0.30051 | Oxaloglutarate                                                                                     | 8.4765583  | - | - | - | 37.49975 | 205.143207 |
| POS08133 | 158629.9336 | 145946.9827 | -0.12022 | 0.652965 | 0.8291 | 0.03683 | Bluensomycin                                                                                       | -1.842714  | - | - | - | 37.4981  | 586.565698 |

|          |             |             |          |           |        |         |                                                                                                                                                                   |            |   |   |   |          |            |
|----------|-------------|-------------|----------|-----------|--------|---------|-------------------------------------------------------------------------------------------------------------------------------------------------------------------|------------|---|---|---|----------|------------|
| POS08137 | 487133.5768 | 470590.9282 | -0.04984 | 0.753232  | 0.8848 | 0.04575 | 7,8-Dihydroxykynurete                                                                                                                                             | 20.190492  | - | - | - | 37.473   | 222.178042 |
| POS08140 | 250395.0331 | 144416.0774 | -0.79397 | 0.188421  | 0.5153 | 0.19186 | NA                                                                                                                                                                | -3.2223043 | - | - | - | 37.469   | 364.28345  |
| POS08142 | 55638.07937 | 38411.77891 | -0.53452 | 0.146184  | 0.4716 | 0.08423 | Puerarin xyloside                                                                                                                                                 | 9.5732865  | - | - | - | 37.4552  | 549.505227 |
| POS08144 | 187453.4285 | 199646.3869 | 0.090915 | 0.879933  | 0.9466 | 0.05084 | Sodium picosulfate                                                                                                                                                | -23.481094 | - | - | - | 37.44645 | 482.403273 |
| POS08145 | 131783.2459 | 133173.8219 | 0.015144 | 0.956032  | 0.9806 | 0.00082 | Lippioside II                                                                                                                                                     | 19.362956  | - | - | - | 37.4459  | 555.515313 |
| POS08149 | 546677.9336 | 396487.4585 | -0.46342 | 0.098164  | 0.4046 | 0.28177 | Trinitrotoluene                                                                                                                                                   | -1.5315801 | - | - | - | 37.4402  | 228.138029 |
| POS08150 | 439226.987  | 1157262.551 | 1.397678 | 0.1688362 | 0.4947 | 0.5795  | Phenyl 5-phospho-alpha-D-ribofuranoside                                                                                                                           | -8.4308822 | - | - | - | 37.4402  | 307.210495 |
| POS08151 | 100484.0204 | 210791.049  | 1.068848 | 0.318962  | 0.6272 | 0.15242 | 2-(formamido)-N-(2-phosphoribosyl)acetamide                                                                                                                       | 5.663066   | - | - | - | 37.4382  | 314.21075  |
| POS08156 | 77021.63672 | 49968.87504 | -0.62423 | 0.578144  | 0.7846 | 0.06173 | Sodium folite                                                                                                                                                     | -18.973782 | - | - | - | 37.4377  | 496.418977 |
| POS08158 | 1313498.56  | 938859.1073 | -0.48443 | 0.01688   | 0.2275 | 0.53322 | Barbiturate                                                                                                                                                       | -19.870926 | - | - | - | 37.4366  | 129.090931 |
| POS08161 | 173883.7628 | 163027.0928 | -0.09301 | 0.874915  | 0.9448 | 0.06472 | dUMP                                                                                                                                                              | 2.3978334  | - | - | - | 37.43635 | 309.189916 |
| POS08167 | 153642.209  | 226964.8775 | 0.562894 | 0.296761  | 0.6103 | 0.12318 | Pelargonidin 3-O-beta-D-sambubioside                                                                                                                              | 10.094153  | - | - | - | 37.4345  | 566.513085 |
| POS08169 | 415697.5639 | 337321.2881 | -0.30141 | 0.121855  | 0.4395 | 0.17359 | Neohesperidin dihydrochalcone                                                                                                                                     | 16.660485  | - | - | - | 37.434   | 613.593882 |
| POS08171 | 1294402.38  | 1171381.719 | -0.14407 | 0.414693  | 0.6784 | 0.15145 | Sulfite                                                                                                                                                           | -5.3258053 | - | - | - | 37.4314  | 81.0698502 |
| POS08172 | 34545.65759 | 30785.70292 | -0.16624 | 0.79017   | 0.9034 | 0.00384 | 0-[2,3-dihydroxy-3-(3,3,4-trihydroxy-3,4-dihydro-2H-1-benzopyran-2-yl)-hydroxy-2-oxo-2H,8H,9H-furo[2,3-b]chromen-8-yl]-N-Pyruvoyl-5-methoxy-3-hydroxyanthranilate | 9.6290975  | - | - | - | 37.4314  | 483.405922 |
| POS08173 | 133083.4598 | 143622.3664 | 0.109949 | 0.838834  | 0.9266 | 0.02753 |                                                                                                                                                                   | 22.374234  | - | - | - | 37.4314  | 537.50528  |
| POS08175 | 462384.1207 | 339762.5127 | -0.44457 | 0.304844  | 0.6169 | 0.23252 |                                                                                                                                                                   | -17.311718 | - | - | - | 37.41635 | 254.210993 |
| POS08177 | 900154.0955 | 723469.4917 | -0.31524 | 0.389223  | 0.6599 | 0.28153 | Pelargonidin                                                                                                                                                      | 20.983866  | - | - | - | 37.4147  | 272.257768 |
| POS08179 | 403710.4664 | 365712.5899 | -0.14261 | 0.533589  | 0.7588 | 0.05732 | Hesperidin                                                                                                                                                        | 17.001989  | - | - | - | 37.4132  | 611.578257 |
| POS08181 | 468418.3797 | 342739.4329 | -0.45069 | 0.348229  | 0.6355 | 0.18959 | Furcozole-cis                                                                                                                                                     | 2.0218726  | - | - | - | 37.3987  | 397.199878 |
| POS08185 | 959671.7492 | 800398.8825 | -0.26182 | 0.363918  | 0.6446 | 0.20363 | N-Phosphohypotaurocyamin                                                                                                                                          | -23.478722 | - | - | - | 37.3919  | 232.169249 |
| POS08188 | 260118.9726 | 187860.2384 | -0.46951 | 0.351103  | 0.6364 | 0.1496  | Lead nitrate                                                                                                                                                      | 11.288213  | - | - | - | 37.3404  | 332.220815 |
| POS08194 | 1742098.552 | 987389.4353 | -0.81914 | 0.011182  | 0.1994 | 0.73012 | trans-2-[(Dimethylamino)methyl]-5-[2-(5-nitro-2                                                                                                                   | 14.040666  | - | - | - | 37.2832  | 278.247269 |

|          |             |             |          |          |        |         |                                                          |            |   |   |   |          |            |
|----------|-------------|-------------|----------|----------|--------|---------|----------------------------------------------------------|------------|---|---|---|----------|------------|
| POS08196 | 1918114.675 | 15568930.56 | 3.020909 | 0.352687 | 0.6367 | 1.57651 | Chlorthiamid                                             | 9.0096909  | - | - | - | 37.2664  | 207.101433 |
| POS08200 | 106161.2706 | 57783.05711 | -0.87754 | 0.214017 | 0.5365 | 0.12883 | Thiadiazolidinethione                                    | -5.176799  | - | - | - | 37.2602  | 343.283305 |
| POS08205 | 674046.8164 | 393469.2166 | -0.7766  | 0.04211  | 0.3014 | 0.43542 | D-Acetylamino-D-formylamino-3-methyluracil               | 15.632569  | - | - | - | 37.2596  | 227.200213 |
| POS08207 | 1106526.486 | 1296131.284 | 0.228174 | 0.715187 | 0.8615 | 0.06441 | O-Phospho-L-homoserine                                   | 2.1912532  | - | - | - | 37.25265 | 200.106813 |
| POS08208 | 424793.2633 | 322406.5757 | -0.39788 | 0.585836 | 0.7891 | 0.14899 | Bretylum                                                 | -6.4583489 | - | - | - | 37.2429  | 244.169106 |
| POS08212 | 284555.1512 | 211795.4394 | -0.42604 | 0.388275 | 0.6594 | 0.14013 | Bis(4-chlorophenyl)acetate                               | -0.8565736 | - | - | - | 37.2256  | 282.141036 |
| POS08224 | 1153653.99  | 978615.4071 | -0.2374  | 0.570927 | 0.7802 | 0.13863 | Musk xylene                                              | -22.709255 | - | - | - | 37.1988  | 298.264526 |
| POS08225 | 162943.9122 | 118648.7198 | -0.45768 | 0.33821  | 0.6326 | 0.1132  | L-Deoxy-D-hydroxymethylcytidine-5'-diphosphate           | 21.205723  | - | - | - | 37.1988  | 418.219124 |
| POS08229 | 448941.2065 | 414492.5456 | -0.11518 | 0.630542 | 0.8165 | 0.06947 | Cartormin                                                | 13.384667  | - | - | - | 37.1988  | 576.53308  |
| POS08235 | 63638.4817  | 61049.14924 | -0.05993 | 0.911057 | 0.9581 | 0.00642 | Ethiprole                                                | -17.66524  | - | - | - | 37.18585 | 398.20326  |
| POS08237 | 256043.1985 | 213330.7921 | -0.2633  | 0.244324 | 0.5624 | 0.11145 | Diosmin                                                  | 17.616891  | - | - | - | 37.17535 | 609.562697 |
| POS08245 | 538272.2406 | 465123.909  | -0.21072 | 0.313524 | 0.6237 | 0.13053 | Fosaprepitant                                            | -20.363253 | - | - | - | 37.1642  | 615.401365 |
| POS08251 | 383104.6439 | 222115.8699 | -0.78643 | 0.042265 | 0.302  | 0.31042 | Velloquercetin                                           | 6.9429498  | - | - | - | 37.1478  | 369.346634 |
| POS08254 | 352338.5754 | 147992.247  | -1.25144 | 0.199195 | 0.5251 | 0.31669 | Taxiphyllin                                              | -18.343287 | - | - | - | 37.13625 | 312.288867 |
| POS08255 | 318109.9038 | 239942.2627 | -0.40684 | 0.045942 | 0.3134 | 0.21419 | L-amino-4-[[1-[(carboxymethyl)-C-hydroxycarbonimidoyl]-2 | -3.985703  | - | - | - | 37.13625 | 622.574799 |
| POS08258 | 952130.5406 | 883631.8525 | -0.10771 | 0.741747 | 0.8784 | 0.04515 | 4-Pyridoxate                                             | 4.7818296  | - | - | - | 37.1227  | 184.169552 |
| POS08261 | 391028.9237 | 222276.7294 | -0.81492 | 0.075649 | 0.3687 | 0.31463 | Profluralin                                              | -24.67217  | - | - | - | 37.11315 | 348.288508 |
| POS08267 | 435796.4103 | 362424.6922 | -0.26597 | 0.271541 | 0.5887 | 0.15381 | 5'-Deoxy-5'-fluoroadenosine                              | 9.2630567  | - | - | - | 37.1087  | 270.242171 |
| POS08268 | 229604.1775 | 199488.3529 | -0.20284 | 0.618982 | 0.8104 | 0.04821 | 2-(alpha-D-Mannosyl)-3-phosphoglycerate                  | -14.457086 | - | - | - | 37.1087  | 349.200043 |
| POS08269 | 292968.5695 | 143586.3156 | -1.02883 | 0.004589 | 0.1436 | 0.35072 | Dinitramine                                              | -18.938224 | - | - | - | 37.1077  | 323.241674 |
| POS08273 | 286257.7658 | 201126.4206 | -0.50921 | 0.010154 | 0.1952 | 0.24197 | Forsythiaside                                            | -1.447952  | - | - | - | 37.1064  | 625.593472 |
| POS08275 | 472065.2231 | 419544.2943 | -0.17016 | 0.510204 | 0.7445 | 0.09004 | CGH 2466                                                 | 3.0022979  | - | - | - | 37.10625 | 323.220644 |
| POS08277 | 238904.2824 | 192279.4943 | -0.31323 | 0.088514 | 0.3878 | 0.14035 | Kuwanon L                                                | -6.1301032 | - | - | - | 37.1051  | 627.609535 |

|          |             |             |          |          |        |         |                                                                                              |            |   |   |   |          |            |
|----------|-------------|-------------|----------|----------|--------|---------|----------------------------------------------------------------------------------------------|------------|---|---|---|----------|------------|
| POS08280 | 324797.3372 | 260747.9215 | -0.31688 | 0.528784 | 0.7568 | 0.09103 | Phosphoguanidinoacetate                                                                      | -12.998013 | - | - | - | 37.105   | 198.091215 |
| POS08282 | 123578.2522 | 105215.8584 | -0.23207 | 0.378649 | 0.6529 | 0.06959 | o-[(2,4-dihydroxyphenyl)-4-oxo-4H-pyrimidin-2-ylidene]-4,5                                   | 24.455906  | - | - | - | 37.1038  | 595.546816 |
| POS08286 | 667007.3076 | 335061.52   | -0.99328 | 0.072184 | 0.3613 | 0.4293  | Xanthurenate-8-O-beta-D-glucoside                                                            | -0.3126016 | - | - | - | 37.1013  | 368.314662 |
| POS08287 | 91323.41752 | 88056.98451 | -0.05255 | 0.865349 | 0.9391 | 0.00322 | Genipin 1-beta-gentiobioside                                                                 | 11.602899  | - | - | - | 37.096   | 551.520764 |
| POS08288 | 71216.17032 | 63803.43529 | -0.15857 | 0.700317 | 0.8529 | 0.05071 | dIDP                                                                                         | 2.8383489  | - | - | - | 37.09165 | 413.194947 |
| POS08289 | 446107.14   | 365754.0544 | -0.28652 | 0.246643 | 0.5647 | 0.16289 | N-[4-(5-Nitro-2-furyl)-2-thiazolyl]acetamide                                                 | 21.696688  | - | - | - | 37.0857  | 254.247371 |
| POS08297 | 247623.7022 | 209615.7325 | -0.2404  | 0.35744  | 0.6409 | 0.09219 | Mulberrofuran M                                                                              | 20.757074  | - | - | - | 37.06575 | 591.552034 |
| POS08299 | 281634.0626 | 310289.4783 | 0.139793 | 0.557871 | 0.7733 | 0.04783 | 7,8-Dihydro-7,8-dihydroxykynurete                                                            | -18.536122 | - | - | - | 37.0614  | 224.18534  |
| POS08304 | 984036.201  | 578334.2141 | -0.76681 | 0.019094 | 0.2336 | 0.5115  | S-Nitrosogluthathione                                                                        | -0.9331791 | - | - | - | 37.04425 | 337.328963 |
| POS08313 | 199114.7264 | 156844.7694 | -0.34426 | 0.730892 | 0.8715 | 0.12536 | 6-Deoxy-6-sulfo-D-glucono-1,5-lactone                                                        | -3.349188  | - | - | - | 36.94075 | 243.210265 |
| POS08320 | 268322.2004 | 155433.4995 | -0.78767 | 0.036892 | 0.2883 | 0.2791  | 1-(4-Amino-2-methylpyrimid-5-ylmethyl)-3-(5,4-dihydroxyphenyl)prop-2-enylidene-3,4-dihydroxy | -17.573585 | - | - | - | 36.9068  | 340.232215 |
| POS08322 | 85454.92505 | 65600.80077 | -0.38145 | 0.373179 | 0.6502 | 0.0718  | 1-(4-Amino-2-methylpyrimid-5-ylmethyl)-3-(5,4-dihydroxyphenyl)prop-2-enylidene-3,4-dihydroxy | 10.713142  | - | - | - | 36.90625 | 441.391994 |
| POS08325 | 1           | 163606.4053 | 17.31987 | 0.340893 | 0.6326 | 0.17686 | Cryptophycin 1                                                                               | 15.47061   | - | - | - | 36.8993  | 656.194913 |
| POS08327 | 123886.3696 | 107282.8814 | -0.2076  | 0.255969 | 0.5738 | 0.07579 | Biotinyl-5'-AMP                                                                              | -11.372245 | - | - | - | 36.8866  | 574.517354 |
| POS08328 | 184112.606  | 144781.1182 | -0.34671 | 0.204056 | 0.5278 | 0.1137  | Aflatoxin B1exo-8,9-epoxide-GSH                                                              | -20.905546 | - | - | - | 36.886   | 636.590489 |
| POS08329 | 211494.067  | 168663.3063 | -0.32647 | 0.152082 | 0.4792 | 0.12493 | Cefoperazone sodium                                                                          | -5.8408706 | - | - | - | 36.886   | 668.652577 |
| POS08333 | 1           | 1844163.122 | 20.81453 | 0.340893 | 0.6326 | 0.59378 | dATP                                                                                         | -8.274898  | - | - | - | 36.8739  | 492.184812 |
| POS08338 | 1           | 718975.4885 | 19.45558 | 0.340893 | 0.6326 | 0.37075 | DG(24:0/0/22:4n6)                                                                            | 22.41408   | - | - | - | 36.8739  | 758.262249 |
| POS08340 | 208001.2272 | 196874.9859 | -0.07931 | 0.704209 | 0.8556 | 0.01838 | Fluorocitric acid                                                                            | 7.012874   | - | - | - | 36.8733  | 211.12275  |
| POS08347 | 454690.492  | 456477.9131 | 0.00566  | 0.979632 | 0.99   | 0.02263 | UDP-2,4-bis(acetamido)-2,4,6-trideoxy-beta-L-ribose                                          | -1.4441101 | - | - | - | 36.8564  | 633.412563 |
| POS08351 | 27751.36819 | 20210.18363 | -0.45748 | 0.371809 | 0.6502 | 0.0434  | Pyranocyanin A                                                                               | -9.9201383 | - | - | - | 36.8467  | 634.574991 |
| POS08353 | 298759.0504 | 193470.4936 | -0.62687 | 0.412503 | 0.6769 | 0.15766 | S-methyl-5-thio-D-ribose 1-phosphate(2-)                                                     | 9.4099855  | - | - | - | 36.8438  | 259.189706 |
| POS08354 | 92949.6806  | 71728.47096 | -0.3739  | 0.16098  | 0.4884 | 0.0854  | Orobanchoside                                                                                | -1.0903347 | - | - | - | 36.8438  | 623.577898 |

|          |             |             |          |          |        |         |                                                                    |            |   |   |   |          |            |
|----------|-------------|-------------|----------|----------|--------|---------|--------------------------------------------------------------------|------------|---|---|---|----------|------------|
| POS08357 | 140084.3697 | 101087.5377 | -0.47069 | 0.077156 | 0.371  | 0.13752 | Kanokoside C                                                       | -15.958131 | - | - | - | 36.83735 | 639.609286 |
| POS08359 | 44606.3203  | 44052.47344 | -0.01803 | 0.957171 | 0.981  | 0.00438 | 5,4,3-trimethoxy-6-(1-methoxy-4-oxo-2-phenyl-9-(2,4,5-trihydroxy-6 | 7.6059582  | - | - | - | 36.8309  | 607.54489  |
| POS08360 | 104519.2459 | 105999.764  | 0.020292 | 0.92867  | 0.9674 | 0.0098  | Ditalimfos                                                         | -3.0384516 | - | - | - | 36.8309  | 300.288967 |
| POS08364 | 1563433.145 | 1160500.733 | -0.42997 | 0.04772  | 0.3143 | 0.46318 | 2-nyuroxy-3-[4-nyuroxy-3-(sulfooxy)phenyl]propanoi                 | -22.67764  | - | - | - | 36.81005 | 279.230967 |
| POS08374 | 7849444.459 | 4234825.755 | -0.89029 | 0.036553 | 0.2867 | 1.51414 | Caffeoyl aspartic acid                                             | 19.02758   | - | - | - | 36.78485 | 296.257694 |
| POS08377 | 466630.2503 | 436441.071  | -0.09649 | 0.887254 | 0.9486 | 0.10532 | 5,4,3-trimethoxy-6-(4-hydroxy-1H-indole-3-carboxylate)oxane 2      | -18.259055 | - | - | - | 36.7788  | 354.283826 |
| POS08391 | 488054.9335 | 366816.5633 | -0.41198 | 0.040749 | 0.2986 | 0.28895 | D-Galactose 6-sulfate                                              | -21.71451  | - | - | - | 36.7722  | 261.220726 |
| POS08392 | 1158263.296 | 1029256.937 | -0.17036 | 0.345387 | 0.6341 | 0.16286 | 2,4-Dihydroxypteridine                                             | -9.4007718 | - | - | - | 36.7661  | 165.127334 |
| POS08395 | 1291699.825 | 681596.4977 | -0.92228 | 0.040381 | 0.2976 | 0.61691 | DHAP(8:0)                                                          | -0.6705078 | - | - | - | 36.7629  | 297.261078 |
| POS08397 | 4401472.729 | 540698.7754 | -3.02509 | 0.004966 | 0.1496 | 1.70078 | 3,6,8-Trimethylallantoin                                           | 7.9020408  | - | - | - | 36.7586  | 201.204059 |
| POS08400 | 415740.794  | 457689.1543 | 0.138684 | 0.562347 | 0.776  | 0.11732 | Isosorbide dinitrate                                               | 18.567977  | - | - | - | 36.74625 | 237.147961 |
| POS08402 | 645221.1359 | 699526.8208 | 0.116586 | 0.916418 | 0.9615 | 0.01001 | D-Ribose 5-phosphate                                               | -20.682822 | - | - | - | 36.7442  | 231.112317 |
| POS08410 | 323983.8678 | 279307.392  | -0.21407 | 0.344849 | 0.634  | 0.11258 | 4-Maleylacetoacetate                                               | -22.23918  | - | - | - | 36.7202  | 201.148326 |
| POS08411 | 151356.7377 | 168989.5015 | 0.158981 | 0.597313 | 0.7955 | 0.07991 | Benzoylprop-ethyl                                                  | 3.0645617  | - | - | - | 36.70105 | 367.246899 |
| POS08413 | 236397.3919 | 233708.2673 | -0.01651 | 0.924277 | 0.9658 | 0.00113 | GDP-4-acetamido-4,6-dideoxy-alpha-D-mannose                        | -5.7331125 | - | - | - | 36.69115 | 631.397262 |
| POS08418 | 5961393.726 | 3451039.802 | -0.78862 | 0.708872 | 0.8579 | 0.39978 | Convicine                                                          | -22.078876 | - | - | - | 36.65825 | 306.241937 |
| POS08419 | 179464.9759 | 150309.3443 | -0.25577 | 0.329531 | 0.6326 | 0.08987 | 3-Hydroxy-1-(4-sulfophenyl)-4-[(E)-(4-sulfophenyl)diazenyl]-1H     | -4.0075499 | - | - | - | 36.65795 | 469.423399 |
| POS08422 | 635776.246  | 481487.8013 | -0.40102 | 0.175805 | 0.502  | 0.23615 | thymidine 3'-monophosphate                                         | 9.4342646  | - | - | - | 36.64155 | 321.205297 |
| POS08425 | 973599.5117 | 811116.1416 | -0.26342 | 0.154744 | 0.4831 | 0.25361 | norsertaline                                                       | 0.1905628  | - | - | - | 36.6332  | 293.210332 |
| POS08430 | 536087.4541 | 387441.1768 | -0.46849 | 0.016687 | 0.2268 | 0.30845 | 1-Methylhypoxanthine                                               | 18.852708  | - | - | - | 36.5931  | 151.148107 |
| POS08431 | 270485.7611 | 9995898.373 | 5.207712 | 0.340645 | 0.6326 | 1.36373 | Uracil                                                             | 18.465872  | - | - | - | 36.5872  | 113.096146 |
| POS08440 | 181245.8209 | 129392.701  | -0.48619 | 0.332401 | 0.6326 | 0.12088 | Validamine 7-phosphate                                             | -2.5830115 | - | - | - | 36.5632  | 258.184812 |
| POS08455 | 67957.16997 | 22756.30106 | -1.57836 | 0.003937 | 0.1352 | 0.18879 | Coenzyme B                                                         | -19.386299 | - | - | - | 36.5465  | 344.334221 |

|          |             |             |          |          |        |         |                                                                         |            |   |   |   |          |            |
|----------|-------------|-------------|----------|----------|--------|---------|-------------------------------------------------------------------------|------------|---|---|---|----------|------------|
| POS08457 | 6641.510355 | 1392390.98  | 7.711837 | 0.343098 | 0.6329 | 0.51289 | Deltamethrin                                                            | -11.885816 | - | - | - | 36.5465  | 506.200472 |
| POS08461 | 883225.7598 | 588588.0485 | -0.58552 | 0.00036  | 0.0721 | 0.50103 | D-Glycerate                                                             | 8.6055732  | - | - | - | 36.5437  | 107.085489 |
| POS08467 | 89958.56012 | 65757.60027 | -0.4521  | 0.054876 | 0.3269 | 0.12218 | Aventhramide A                                                          | -18.321382 | - | - | - | 36.52665 | 300.279893 |
| POS08469 | 158735.6921 | 246718.9225 | 0.636242 | 0.404473 | 0.671  | 0.19603 | Nitrofurantoin                                                          | -2.9288418 | - | - | - | 36.5164  | 239.163579 |
| POS08470 | 534325.3723 | 453050.7282 | -0.23805 | 0.426146 | 0.6861 | 0.11657 | Halobetasol Propionate                                                  | 8.2169427  | - | - | - | 36.512   | 485.971261 |
| POS08472 | 3384020.218 | 2187509.137 | -0.62945 | 0.084359 | 0.3821 | 0.77598 | Psicofuranine                                                           | -4.1938113 | - | - | - | 36.512   | 298.27333  |
| POS08473 | 197390.5806 | 135256.2563 | -0.54536 | 0.159243 | 0.4871 | 0.16962 | Estra-1,3,5(10)-triene-3,17beta-diol 3-phosphate                        | 21.636217  | - | - | - | 36.512   | 353.3768   |
| POS08476 | 105469.7725 | 100573.2837 | -0.06858 | 0.628083 | 0.8149 | 0.02824 | 7,8-Dihydroxykynurete                                                   | -17.998256 | - | - | - | 36.50545 | 222.169596 |
| POS08481 | 115607.0741 | 138496.8683 | 0.260624 | 0.659469 | 0.8327 | 0.0646  | Fleroxacin                                                              | 11.488898  | - | - | - | 36.4956  | 370.34982  |
| POS08482 | 121504.0239 | 93793.65091 | -0.37344 | 0.271062 | 0.5885 | 0.09414 | BL V                                                                    | -0.0326369 | - | - | - | 36.4827  | 425.364263 |
| POS08483 | 455524.1054 | 383164.607  | -0.24956 | 0.033494 | 0.2804 | 0.21119 | L-Oxalylalbizziine                                                      | 12.956428  | - | - | - | 36.47825 | 220.162316 |
| POS08485 | 509180.5589 | 322918.9178 | -0.65701 | 0.129632 | 0.4481 | 0.28087 | N7-Methylguanosine                                                      | -19.02143  | - | - | - | 36.4741  | 299.276803 |
| POS08486 | 390238.1311 | 288432.1369 | -0.43612 | 0.060257 | 0.3376 | 0.25298 | cis-(Homo)2-aconitate                                                   | -22.919218 | - | - | - | 36.47405 | 203.164043 |
| POS08488 | 2810965.45  | 2447663.466 | -0.19966 | 0.800717 | 0.9093 | 0.29493 | Pyrido[3,4-c]psoralen                                                   | -5.6110891 | - | - | - | 36.4646  | 238.216246 |
| POS08490 | 247896.9115 | 131541.8239 | -0.91422 | 0.20408  | 0.5278 | 0.20832 | 1-(4-methoxy-2-oxo-2H-chromen-6-yl)-3-oxobutanoic acid                  | 10.404935  | - | - | - | 36.45775 | 343.330838 |
| POS08491 | 152739.4326 | 240448.5434 | 0.654656 | 0.383573 | 0.6571 | 0.15602 | 1-(2,5,4,6-tetrahydroxyphenyl)-3-o-(alpha-D-glucosaminyl)-D-myoinositol | -6.5463776 | - | - | - | 36.4577  | 337.257075 |
| POS08493 | 68370.67402 | 56898.64901 | -0.26498 | 0.297998 | 0.6114 | 0.06151 | Pyrimidine 5'-deoxynucleotide                                           | -1.5479316 | - | - | - | 36.45125 | 342.318448 |
| POS08495 | 528094.4544 | 336841.8009 | -0.64872 | 0.095723 | 0.4004 | 0.34718 | D-Erythroascorbic acid 1'-alpha-D-xylopyranoside                        | 19.472584  | - | - | - | 36.4503  | 278.203674 |
| POS08496 | 5305854.343 | 3712608.124 | -0.51515 | 0.025324 | 0.2562 | 1.07447 |                                                                         | -15.88048  | - | - | - | 36.4496  | 279.215658 |
| POS08500 | 123969.0106 | 38912.64631 | -1.67167 | 0.098538 | 0.4049 | 0.20822 | Pyrazolate                                                              | 4.5943041  | - | - | - | 36.44495 | 440.321595 |
| POS08505 | 79978.23462 | 74553.6854  | -0.10133 | 0.821031 | 0.9179 | 0.00991 | 4,4'-Diaminostilbene dihydrochloride                                    | -11.240885 | - | - | - | 36.4444  | 284.200293 |
| POS08508 | 97236.79747 | 38910.90837 | -1.32133 | 0.012839 | 0.21   | 0.20346 | Fraxin                                                                  | -1.8343998 | - | - | - | 36.4444  | 371.314697 |
| POS08509 | 174653.2261 | 137017.9677 | -0.35013 | 0.573388 | 0.7814 | 0.0875  | Melicopine                                                              | -23.980809 | - | - | - | 36.44285 | 314.304463 |



|          |             |             |          |          |        |         |                                                                |            |   |   |   |          |            |
|----------|-------------|-------------|----------|----------|--------|---------|----------------------------------------------------------------|------------|---|---|---|----------|------------|
| POS08519 | 597574.0325 | 411307.0775 | -0.5389  | 0.345077 | 0.6341 | 0.24592 | a-Methyl dopa mono-O-sulfate                                   | -6.6907271 | - | - | - | 36.4269  | 324.325113 |
| POS08521 | 113215.0164 | 99186.54044 | -0.19085 | 0.319396 | 0.6273 | 0.05775 | Diamidafos                                                     | 13.597868  | - | - | - | 36.42355 | 201.184799 |
| POS08524 | 585706.0725 | 453102.0111 | -0.37034 | 0.603175 | 0.7994 | 0.19303 | Acyclovir                                                      | 19.324695  | - | - | - | 36.40885 | 226.216229 |
| POS08526 | 433906.2813 | 334137.3116 | -0.37694 | 0.010205 | 0.1952 | 0.27761 | Calcium carbote                                                | 18.774677  | - | - | - | 36.4083  | 101.096056 |
| POS08529 | 473313.8009 | 463293.6151 | -0.03087 | 0.885304 | 0.9482 | 0.00644 | Flumetsulam                                                    | 9.9337243  | - | - | - | 36.4083  | 326.304508 |
| POS08531 | 355247.443  | 310055.0962 | -0.1963  | 0.320918 | 0.6286 | 0.10845 | L-Rhamnose                                                     | -0.2408674 | - | - | - | 36.3925  | 165.163737 |
| POS08532 | 458449.0303 | 394610.333  | -0.21633 | 0.294757 | 0.6086 | 0.14738 | Sulfite                                                        | -11.630251 | - | - | - | 36.3925  | 83.085422  |
| POS08539 | 258114.8544 | 153455.6636 | -0.75019 | 0.522996 | 0.7529 | 0.13485 | l-(2,3,6-trihydroxy-5H-chromen-2-yl)phenylethanesulfonic acid  | -19.983218 | - | - | - | 36.31705 | 368.299937 |
| POS08542 | 280826.9565 | 223613.8829 | -0.32867 | 0.101938 | 0.4083 | 0.16933 | D-Mannitol 1-phosphate                                         | 18.396338  | - | - | - | 36.3133  | 263.163799 |
| POS08548 | 126714.79   | 82424.32512 | -0.62044 | 0.618279 | 0.8102 | 0.07015 | Bis(3-azidopyridinium)-1,10-decane perchlorate                 | -22.345891 | - | - | - | 36.3009  | 452.39309  |
| POS08549 | 396000.3886 | 303473.6104 | -0.38393 | 0.011014 | 0.1993 | 0.26159 | N-Acetylgalactosamine                                          | -21.335376 | - | - | - | 36.2919  | 236.193559 |
| POS08551 | 31606.02752 | 25169.04302 | -0.32855 | 0.782222 | 0.8996 | 0.02238 | Styraxin                                                       | 6.1867333  | - | - | - | 36.28685 | 371.362268 |
| POS08552 | 93827.17818 | 63828.43634 | -0.55581 | 0.110488 | 0.4223 | 0.12708 | l-(2,6-dimethoxy-4-oxo-2-phenyl-4H-chromen-8-yl)propanoic acid | 15.009111  | - | - | - | 36.28645 | 497.454728 |
| POS08553 | 505305.6454 | 394676.5718 | -0.35649 | 0.059587 | 0.3364 | 0.22576 | Ketamine hydrochloride                                         | 23.888715  | - | - | - | 36.28165 | 275.200027 |
| POS08555 | 108914.2789 | 114356.8185 | 0.070349 | 0.748711 | 0.8819 | 0.01291 | S-Methyl-3-phospho-1-thio-D-glycerate                          | 8.7502706  | - | - | - | 36.2673  | 217.158568 |
| POS08557 | 1019429.257 | 865119.9423 | -0.23679 | 0.239072 | 0.559  | 0.24822 | Dicrotophos                                                    | 14.655043  | - | - | - | 36.2617  | 238.200853 |
| POS08559 | 485339.8498 | 230579.8961 | -1.07373 | 0.12707  | 0.4454 | 0.33501 | D-Glucono-1,5-lactone 6-phosphate                              | 19.284002  | - | - | - | 36.255   | 259.132154 |
| POS08566 | 441511.3757 | 343315.9585 | -0.36291 | 0.380146 | 0.6541 | 0.14677 | Bialaphos                                                      | -3.692723  | - | - | - | 36.23425 | 324.288683 |
| POS08569 | 158086.7507 | 93552.70655 | -0.75687 | 0.06881  | 0.3541 | 0.19485 | Pachyrrhizone                                                  | 8.7927234  | - | - | - | 36.2261  | 367.331498 |
| POS08570 | 132350.4353 | 125360.9454 | -0.07827 | 0.814763 | 0.9158 | 0.03633 | Loquatoside                                                    | -20.605845 | - | - | - | 36.2261  | 439.380343 |
| POS08574 | 1215038.933 | 892500.3257 | -0.44508 | 0.12561  | 0.4442 | 0.41337 | N-Acetyl-L-aspartate                                           | -19.405843 | - | - | - | 36.21985 | 176.143278 |
| POS08577 | 95313.77457 | 394285.6165 | 2.048484 | 0.358836 | 0.6422 | 0.22906 | Nicotite D-ribonucleotide                                      | 5.264899   | - | - | - | 36.2184  | 337.220947 |
| POS08579 | 13386465.09 | 201652.4264 | -6.05276 | 0.000669 | 0.0721 | 3.32977 | 3,4-Dihydroxymandelate                                         | 1.1209926  | - | - | - | 36.208   | 185.153583 |

|          |             |             |          |          |        |         |                                                                      |            |   |   |   |          |            |
|----------|-------------|-------------|----------|----------|--------|---------|----------------------------------------------------------------------|------------|---|---|---|----------|------------|
| POS08584 | 95025.51727 | 213063.7062 | 1.164898 | 0.197517 | 0.5233 | 0.23506 | Dihydroferulic acid 4-O-glucuronide                                  | -2.8258941 | - | - | - | 36.2023  | 373.330224 |
| POS08587 | 859095.2862 | 726941.3868 | -0.24098 | 0.048883 | 0.3167 | 0.27669 | Parathion-methyl                                                     | 6.4646706  | - | - | - | 36.18505 | 264.216478 |
| POS08588 | 281537.1569 | 136351.8839 | -1.04599 | 0.004048 | 0.137  | 0.35181 | 3,3',4',5,6,7,8-Heptahydroxyflavone                                  | 0.2501496  | - | - | - | 36.18505 | 335.24186  |
| POS08592 | 257959.2719 | 182017.0648 | -0.50307 | 0.381164 | 0.6548 | 0.14348 | 3,4,5-trihydroxy-6-(1,2,3,4-dihydroxyphenyl)hexanoic acid            | -3.76388   | - | - | - | 36.1683  | 375.303868 |
| POS08593 | 694635.795  | 690762.784  | -0.00807 | 0.995616 | 0.9978 | 0.01749 | Dihydroxyphenylglycol O-sulfate                                      | 13.140379  | - | - | - | 36.1596  | 251.236565 |
| POS08595 | 291166.7993 | 234948.5158 | -0.3095  | 0.250096 | 0.568  | 0.13991 | Bortezomib                                                           | 17.082282  | - | - | - | 36.1533  | 385.25084  |
| POS08596 | 530696.6466 | 412744.9351 | -0.36264 | 0.085768 | 0.3851 | 0.25298 | Endothion                                                            | 16.924055  | - | - | - | 36.15245 | 281.246719 |
| POS08599 | 205706.9206 | 186632.5821 | -0.14039 | 0.438483 | 0.6955 | 0.07059 | Eflornithine                                                         | -8.2225048 | - | - | - | 36.1412  | 183.174279 |
| POS08601 | 235300.8941 | 249691.9709 | 0.085643 | 0.80851  | 0.9121 | 0.04001 | 2-Amino-1,2-bis(p-chlorophenyl)ethanol                               | -13.33533  | - | - | - | 36.129   | 283.168614 |
| POS08602 | 290575.6401 | 261084.7857 | -0.1544  | 0.70907  | 0.8579 | 0.03593 | Nitazoxanide                                                         | 15.095868  | - | - | - | 36.1259  | 308.293915 |
| POS08608 | 248078.4513 | 227208.7899 | -0.12678 | 0.726222 | 0.8685 | 0.0572  | 3-(Imidazol-4-yl)-2-oxopropyl phosphate                              | 4.1110796  | - | - | - | 36.1228  | 221.127982 |
| POS08610 | 1309196.959 | 1098417.249 | -0.25326 | 0.035476 | 0.2845 | 0.36443 | 5'-Dehydroadenosine                                                  | -2.37355   | - | - | - | 36.121   | 266.232047 |
| POS08611 | 1768226.448 | 1633069.034 | -0.11472 | 0.627891 | 0.8149 | 0.14422 | Formyl phosphate                                                     | 22.89798   | - | - | - | 36.1207  | 127.015462 |
| POS08618 | 6717657.209 | 6458561.532 | -0.05675 | 0.808226 | 0.9121 | 0.13066 | 2-Oxo-4-phosphonobutanoate                                           | 12.385882  | - | - | - | 36.1184  | 183.078032 |
| POS08622 | 262498.8504 | 186669.6984 | -0.49182 | 0.675499 | 0.8398 | 0.1049  | Nitrofurazone                                                        | 1.5485438  | - | - | - | 36.1149  | 199.143783 |
| POS08624 | 3063526.62  | 1924544.321 | -0.67068 | 0.089717 | 0.3895 | 0.7213  | Mitomycin B                                                          | 17.395178  | - | - | - | 36.11315 | 336.325109 |
| POS08628 | 80473.11357 | 72331.61309 | -0.15388 | 0.623659 | 0.8127 | 0.04174 | alpha,beta-Dihydroxyethyl-TPP                                        | 7.5634972  | - | - | - | 36.10945 | 486.377248 |
| POS08629 | 547733.5741 | 286161.882  | -0.93664 | 0.017996 | 0.2285 | 0.43918 | Musca-aurin-I                                                        | -20.220952 | - | - | - | 36.10605 | 352.268474 |
| POS08631 | 119611.494  | 76300.48889 | -0.64859 | 0.09932  | 0.4055 | 0.16308 | Sterigmatocystin                                                     | 1.7618409  | - | - | - | 36.1042  | 325.292148 |
| POS08632 | 230187.0611 | 122711.5947 | -0.90754 | 0.024279 | 0.2519 | 0.2755  | 4-(2,4-dinitroxy-3-oxo-6-[[3,4,5-trihydroxy-6-(hydroxymethyl)hexan-2 | 4.231617   | - | - | - | 36.1007  | 531.459521 |
| POS08643 | 73638.80039 | 67912.48634 | -0.11679 | 0.717591 | 0.8635 | 0.02747 | 3-oxobrimonidine                                                     | -17.378539 | - | - | - | 36.0643  | 311.151887 |
| POS08647 | 200966.302  | 621805.0652 | 1.629509 | 0.035404 | 0.2845 | 0.5576  | Nifurthiazole                                                        | 6.0135055  | - | - | - | 36.0535  | 255.231405 |
| POS08648 | 213979.9841 | 76105.66175 | -1.4914  | 0.007278 | 0.1779 | 0.34349 | Jacareubin                                                           | 1.0719244  | - | - | - | 36.0512  | 327.307826 |

|          |             |             |          |          |        |         |                                                                                               |            |   |   |   |          |            |
|----------|-------------|-------------|----------|----------|--------|---------|-----------------------------------------------------------------------------------------------|------------|---|---|---|----------|------------|
| POS08653 | 1851210.481 | 980906.5304 | -0.91628 | 0.032453 | 0.2773 | 0.72779 | L-nyaroxy-5-14-(sulfooxy)phenyl]propanoic acid                                                | -3.0136942 | - | - | - | 36.0347  | 263.236486 |
| POS08658 | 569116.778  | 447962.3329 | -0.34535 | 0.036136 | 0.2856 | 0.29431 | 5,6-Dihydrouracil                                                                             | 16.324802  | - | - | - | 35.9862  | 115.111739 |
| POS08659 | 244134.2638 | 259556.4614 | 0.088374 | 0.824282 | 0.9196 | 0.05506 | p-Nitrophenyl-O-ethyl ethylphosphote                                                          | -8.6125665 | - | - | - | 35.9858  | 260.200644 |
| POS08663 | 664431.7477 | 591979.2638 | -0.16657 | 0.870702 | 0.9423 | 0.00074 | N-Acetylneuramite                                                                             | -13.069084 | - | - | - | 35.9767  | 310.273135 |
| POS08672 | 3750771.438 | 2956405.957 | -0.34334 | 0.020362 | 0.2383 | 0.75008 | 2-hydroxy-3-(sulfooxy)benzoic acid                                                            | 11.788424  | - | - | - | 35.9377  | 235.190037 |
| POS08674 | 535227.1554 | 453216.4894 | -0.23995 | 0.375984 | 0.651  | 0.13183 | Acetyl citrate                                                                                | 7.8375072  | - | - | - | 35.9353  | 233.153396 |
| POS08676 | 294843.5089 | 206090.9177 | -0.51667 | 0.26091  | 0.5788 | 0.16558 | 1-Deoxy-D-altro-heptulose 7-phosphate                                                         | -21.129994 | - | - | - | 35.9239  | 275.163884 |
| POS08679 | 242074.7533 | 195457.2637 | -0.3086  | 0.533221 | 0.7588 | 0.06575 | (3,6,7-trinyaroxy-4-oxo-2-phenyl-3,4-dihydro-2H-1-benzoxan-2-Mono-(3-carboxypropyl) phthalate | 0.5833229  | - | - | - | 35.9182  | 369.317491 |
| POS08681 | 1267859.983 | 1047408.351 | -0.27557 | 0.050308 | 0.3192 | 0.35764 |                                                                                               | -22.908705 | - | - | - | 35.90065 | 252.216522 |
| POS08684 | 105750.176  | 290030.2247 | 1.455543 | 0.027251 | 0.2602 | 0.37107 | 2-Methylaminoadenosine                                                                        | -1.2485198 | - | - | - | 35.89455 | 297.289407 |
| POS08688 | 156725.8797 | 122164.2277 | -0.35942 | 0.106675 | 0.4153 | 0.14766 | Bortezomib                                                                                    | -20.610788 | - | - | - | 35.8904  | 385.236357 |
| POS08689 | 352535.7651 | 302594.897  | -0.22038 | 0.287042 | 0.6024 | 0.11721 | Thiamine(1+) Diphosphate(1-)                                                                  | -23.063726 | - | - | - | 35.8904  | 425.303491 |
| POS08691 | 88412.47443 | 129231.2384 | 0.547633 | 0.406688 | 0.6724 | 0.10744 | Coenzyme F420-1                                                                               | -24.57518  | - | - | - | 35.8904  | 645.470038 |
| POS08699 | 269370.1165 | 206320.1088 | -0.38471 | 0.565971 | 0.7776 | 0.12823 | Diallat                                                                                       | -1.8429133 | - | - | - | 35.8644  | 271.225879 |
| POS08701 | 850503.8929 | 739020.0603 | -0.2027  | 0.088437 | 0.3878 | 0.24703 | Lycomarasmine B                                                                               | -23.893973 | - | - | - | 35.86215 | 278.231952 |
| POS08704 | 132767.1034 | 184467.8988 | 0.474472 | 0.408077 | 0.6731 | 0.13528 | Geranyl diphosphate                                                                           | -7.217288  | - | - | - | 35.8437  | 315.214109 |
| POS08709 | 97195.4909  | 84142.76839 | -0.20805 | 0.519188 | 0.75   | 0.04879 | Hydroflumethiazide                                                                            | -15.471298 | - | - | - | 35.84075 | 332.294151 |
| POS08710 | 328819.1142 | 287272.4339 | -0.19487 | 0.498561 | 0.7356 | 0.08069 | fluvoxamino acid                                                                              | -1.0663004 | - | - | - | 35.835   | 319.298537 |
| POS08712 | 109038.4085 | 83483.3993  | -0.38528 | 0.293521 | 0.6081 | 0.09052 | (4-(0,11-nyaroxy-1-1,3-hydroxy-5-methoxy-4-(sulfooxy)phenyl) 2,8                              | 6.6180906  | - | - | - | 35.8303  | 514.460675 |
| POS08714 | 266046.2757 | 308564.1843 | 0.213893 | 0.383722 | 0.6571 | 0.0844  | 2,5-Furandicarboxylate                                                                        | -8.8959386 | - | - | - | 35.8226  | 157.098888 |
| POS08715 | 1020797.067 | 797614.3916 | -0.35593 | 0.672981 | 0.8388 | 0.19299 | N-Trimethyl-2-aminoethylphosphote                                                             | 0.5921998  | - | - | - | 35.81755 | 169.158676 |
| POS08722 | 697651.529  | 803550.0043 | 0.203881 | 0.767834 | 0.8921 | 0.13288 | Aurothioglucose                                                                               | 5.9762215  | - | - | - | 35.8045  | 393.18972  |
| POS08729 | 945827.6346 | 434457.6001 | -1.12236 | 0.032061 | 0.2761 | 0.57324 | N-Acetoxy-IQ                                                                                  | -3.8241926 | - | - | - | 35.7911  | 257.266297 |

|          |             |             |          |          |        |         |                                                           |            |   |   |   |          |            |
|----------|-------------|-------------|----------|----------|--------|---------|-----------------------------------------------------------|------------|---|---|---|----------|------------|
| POS08730 | 39315.74791 | 12877.69871 | -1.61023 | 0.032763 | 0.2781 | 0.13018 | Formothion                                                | -19.152867 | - | - | - | 35.7911  | 258.269849 |
| POS08733 | 171728.519  | 130166.5337 | -0.39977 | 0.449657 | 0.7039 | 0.12863 | Aripiprazole                                              | 9.9041669  | - | - | - | 35.79085 | 449.397117 |
| POS08736 | 1109946.7   | 849311.9408 | -0.38612 | 0.110232 | 0.422  | 0.3714  | Pterin                                                    | -4.3070218 | - | - | - | 35.7883  | 164.143374 |
| POS08743 | 264094.9798 | 235569.8237 | -0.1649  | 0.470243 | 0.7182 | 0.07302 | 4-Hydroxy-2,2',3,4',5,5',6-heptachlorobiphenyl            | -4.4448099 | - | - | - | 35.785   | 412.328048 |
| POS08746 | 462987.8452 | 385341.4856 | -0.26484 | 0.055435 | 0.3276 | 0.20618 | Atoxin a(s)                                               | 0.4745845  | - | - | - | 35.77885 | 253.215396 |
| POS08749 | 302680.1016 | 258338.4356 | -0.22853 | 0.729102 | 0.8706 | 0.05281 | 6-Thioguanosine monophosphate                             | 16.600713  | - | - | - | 35.7722  | 380.299773 |
| POS08750 | 161241.2026 | 105034.9993 | -0.61835 | 0.172035 | 0.4983 | 0.16241 | Ethoxysulfuron                                            | -11.829585 | - | - | - | 35.7722  | 399.393564 |
| POS08753 | 560163.5538 | 461687.7834 | -0.27893 | 0.050793 | 0.3197 | 0.25277 | UDP-N-acetyl-D-galactosamine 4-sulfate                    | -8.4270499 | - | - | - | 35.77185 | 688.418384 |
| POS08757 | 545343.9579 | 324215.6704 | -0.75021 | 0.026055 | 0.2576 | 0.37938 | Sulfoquinovose                                            | -4.1443639 | - | - | - | 35.7566  | 245.225964 |
| POS08762 | 489381.6626 | 380434.6915 | -0.36331 | 0.053905 | 0.3242 | 0.24553 | 3-Deoxy-D-manno-octulosote                                | 3.3680496  | - | - | - | 35.7364  | 239.200079 |
| POS08765 | 215780.0655 | 156515.139  | -0.46326 | 0.390262 | 0.6604 | 0.10367 | Mannopine                                                 | 16.099064  | - | - | - | 35.7344  | 311.313272 |
| POS08768 | 443094.8742 | 425962.4032 | -0.05689 | 0.826647 | 0.9204 | 0.00203 | Fosfomycin calcium                                        | -6.6305994 | - | - | - | 35.7311  | 177.127309 |
| POS08769 | 1046659.777 | 508177.2244 | -1.04239 | 0.066264 | 0.3498 | 0.54375 | (2,7-dimethoxy-4-oxo-2-phenyl-3,4-dihydro-2H-1-benzoxan-2 | 17.411158  | - | - | - | 35.7306  | 353.323411 |
| POS08772 | 7192267.524 | 6299826.918 | -0.19113 | 0.229326 | 0.5504 | 0.58507 | Calcium L-aspartate                                       | -15.115399 | - | - | - | 35.7278  | 172.169489 |
| POS08774 | 514952.0872 | 296956.5822 | -0.79419 | 0.109013 | 0.4192 | 0.34063 | 2,3-Dioxo-6-miro-1-sulfamoylbenzo[f]quinoxalina           | -9.5291238 | - | - | - | 35.7248  | 337.284172 |
| POS08775 | 927300.6678 | 564705.4255 | -0.71554 | 0.282709 | 0.5986 | 0.433   | 5-Acetylamino-6-amino-3-methyluracil                      | 9.2705289  | - | - | - | 35.7248  | 199.188414 |
| POS08778 | 89208.25666 | 50689.26178 | -0.8155  | 0.100978 | 0.4074 | 0.15382 | O-Carbamoyladenylate                                      | -15.520848 | - | - | - | 35.71475 | 391.24722  |
| POS08779 | 5031056.816 | 2503034.272 | -1.00718 | 0.055831 | 0.3276 | 1.19491 | Pretetramid                                               | 8.9569823  | - | - | - | 35.71325 | 352.320023 |
| POS08783 | 443355.602  | 384246.6568 | -0.20643 | 0.388718 | 0.6595 | 0.11215 | Nifuradene                                                | 16.330031  | - | - | - | 35.68655 | 225.184437 |
| POS08784 | 139542.3521 | 128943.3283 | -0.11397 | 0.634995 | 0.8188 | 0.02522 | Gallagic acid                                             | -18.254712 | - | - | - | 35.6764  | 605.381544 |
| POS08786 | 215852.2738 | 181441.4695 | -0.25054 | 0.379326 | 0.6535 | 0.11811 | 4-(L-Alanin-3-yl)-2-hydroxy-cis,cis-mucote 6-camialabala  | -16.952678 | - | - | - | 35.6666  | 230.190091 |
| POS08790 | 118458.1754 | 103240.5974 | -0.19837 | 0.487066 | 0.7291 | 0.0508  | Sanguisorbic acid dilactone                               | 11.247725  | - | - | - | 35.64895 | 471.308866 |
| POS08795 | 10728350.81 | 3230154.082 | -1.73175 | 0.158519 | 0.4869 | 1.89735 | Avenanthramide C                                          | -2.8613323 | - | - | - | 35.62635 | 316.283874 |

|          |             |             |          |          |        |         |                                                         |            |   |   |   |          |            |
|----------|-------------|-------------|----------|----------|--------|---------|---------------------------------------------------------|------------|---|---|---|----------|------------|
| POS08797 | 1932319.946 | 2070654.477 | 0.099753 | 0.893553 | 0.9511 | 0.03233 | Riluzole                                                | -0.8105355 | - | - | - | 35.61095 | 235.205387 |
| POS08802 | 155341.5294 | 89730.40673 | -0.79177 | 0.016424 | 0.2247 | 0.20712 | 2-epi-5-epi-Valiolone 7-phosphate                       | -22.614969 | - | - | - | 35.59475 | 273.147622 |
| POS08807 | 412257.6575 | 298727.1375 | -0.46472 | 0.2538   | 0.572  | 0.19706 | 1-epi-Valienol 7-phosphate                              | -22.045488 | - | - | - | 35.5777  | 257.14873  |
| POS08808 | 1619218.512 | 234996.3207 | -2.78459 | 0.342189 | 0.6327 | 0.62754 | 5-(methylsulfanyl)-2,3-dioxopentyl Phosphate(2-)        | 8.9465317  | - | - | - | 35.5739  | 241.179425 |
| POS08812 | 570169.0235 | 448394.555  | -0.34662 | 0.264618 | 0.581  | 0.20792 | Ellagic acid                                            | -16.309384 | - | - | - | 35.5633  | 303.194948 |
| POS08815 | 216811.3522 | 215527.5108 | -0.00857 | 0.974319 | 0.9877 | 0.01457 | Ethidium bromide                                        | -13.600091 | - | - | - | 35.56285 | 395.309514 |
| POS08816 | 3634.79813  | 1           | -11.8277 | 0.114589 | 0.4284 | 0.04216 | Candesartan N2-glucuronide                              | 16.462992  | - | - | - | 35.5622  | 617.595527 |
| POS08822 | 193746.1264 | 287484.2439 | 0.569315 | 0.309901 | 0.6211 | 0.16122 | Aspartyl-Glutamate                                      | 0.6416098  | - | - | - | 35.5424  | 262.216144 |
| POS08824 | 48648.60714 | 39800.95285 | -0.2896  | 0.275868 | 0.5926 | 0.05437 | Diosbulbinoside D                                       | -22.64784  | - | - | - | 35.5424  | 507.494905 |
| POS08825 | 1465241.67  | 687218.2263 | -1.0923  | 0.043166 | 0.3057 | 0.67635 | Sodium caffeine benzoate                                | -3.8646089 | - | - | - | 35.5412  | 339.299769 |
| POS08827 | 278196.2441 | 186889.2443 | -0.57392 | 0.106517 | 0.415  | 0.23602 | Z-10R-manno-N(1)-(S)-U-phosphonato-D-ribozilacetamidine | -13.623549 | - | - | - | 35.52585 | 313.198023 |
| POS08828 | 186693.5869 | 90928.61035 | -1.03787 | 0.421863 | 0.6829 | 0.16517 | Lulicazole                                              | -2.5846158 | - | - | - | 35.52585 | 355.283761 |
| POS08832 | 138764.6135 | 130631.1688 | -0.08714 | 0.821428 | 0.9182 | 0.00799 | Methyclothiazide                                        | -23.041674 | - | - | - | 35.52255 | 361.236276 |
| POS08835 | 415887.062  | 371519.0303 | -0.16276 | 0.434306 | 0.6923 | 0.09697 | Gravacridonetriol glucoside                             | 4.0605732  | - | - | - | 35.51475 | 520.507286 |
| POS08836 | 259540.0814 | 239012.0109 | -0.11887 | 0.542689 | 0.7639 | 0.05702 | Rheidin C                                               | 23.727546  | - | - | - | 35.51475 | 539.521054 |
| POS08837 | 376993.1889 | 261668.2575 | -0.5268  | 0.037509 | 0.2904 | 0.27643 | Cycloguanil hydrochloride                               | -15.07166  | - | - | - | 35.5093  | 289.179233 |
| POS08839 | 584236.1295 | 490500.606  | -0.2523  | 0.157967 | 0.4864 | 0.17826 | TEPP                                                    | -0.4857149 | - | - | - | 35.5093  | 291.194836 |
| POS08840 | 134472.6935 | 203699.5633 | 0.59913  | 0.587917 | 0.7904 | 0.06758 | Diclofop                                                | -13.718574 | - | - | - | 35.5093  | 328.162188 |
| POS08841 | 591926.8524 | 532979.3071 | -0.15134 | 0.266259 | 0.5827 | 0.13577 | Cefamandole fate                                        | 7.0072121  | - | - | - | 35.49945 | 513.505468 |
| POS08842 | 2492091.333 | 1902199.184 | -0.38969 | 0.189185 | 0.5161 | 0.46233 | Boc-Asn-OPhNO2                                          | 3.1177129  | - | - | - | 35.49695 | 354.335678 |
| POS08844 | 444999.4102 | 344988.3876 | -0.36726 | 0.148164 | 0.4736 | 0.22936 | 4-Hydroxylamino-2,6-dinitrotoluene                      | 18.463572  | - | - | - | 35.49695 | 214.158812 |
| POS08845 | 199776.4483 | 120247.2816 | -0.73238 | 0.22082  | 0.5419 | 0.16192 | Sulfazecin                                              | -5.468682  | - | - | - | 35.49695 | 397.378709 |
| POS08846 | 824795.9321 | 748769.491  | -0.13952 | 0.38917  | 0.6599 | 0.13691 | 3-Demethylsimmondsin 2'-(Z)-ferulate                    | -4.8174081 | - | - | - | 35.49695 | 538.517787 |

|          |             |             |          |          |        |         |                                                                                    |            |   |   |   |          |            |
|----------|-------------|-------------|----------|----------|--------|---------|------------------------------------------------------------------------------------|------------|---|---|---|----------|------------|
| POS08852 | 47040.94824 | 29689.23285 | -0.66398 | 0.51673  | 0.7483 | 0.05483 | DL-DL-3-N,N-dimethylamino-2,3,6-trideoxy-4-keto-D-glucose                          | -21.498301 | - | - | - | 35.4799  | 558.377994 |
| POS08855 | 1748949.099 | 1470892.079 | -0.2498  | 0.053987 | 0.3242 | 0.39226 | 5,6-Dihydro-5-fluorouracil                                                         | 6.3705135  | - | - | - | 35.47225 | 133.101218 |
| POS08856 | 309509.0055 | 283959.4287 | -0.1243  | 0.280822 | 0.5966 | 0.08125 | Cyometrinil                                                                        | -22.851606 | - | - | - | 35.47225 | 186.185145 |
| POS08859 | 397952.3524 | 231224.5192 | -0.7833  | 0.024549 | 0.2524 | 0.33276 | 2-(2,4-dimethoxyphenyl)-3,5,7-trihydroxy-2,4-dihydro                               | 18.732729  | - | - | - | 35.47165 | 335.293539 |
| POS08864 | 286781.955  | 291849.2924 | 0.025269 | 0.983334 | 0.9918 | 0.01587 | IACI                                                                               | 2.8136733  | - | - | - | 35.4599  | 599.44436  |
| POS08865 | 197300.5012 | 357350.0915 | 0.856944 | 0.327423 | 0.632  | 0.2365  | 2-(3,5-Dichlorophenyl)carbamoyl                                                    | -7.3694116 | - | - | - | 35.4599  | 303.15825  |
| POS08867 | 67767.56695 | 56911.8981  | -0.25186 | 0.291142 | 0.6054 | 0.05661 | Carminomycin                                                                       | 15.760525  | - | - | - | 35.4599  | 514.50867  |
| POS08872 | 48364024.33 | 20797460.76 | -1.21753 | 0.039867 | 0.2968 | 4.0679  | 1-Methyladenosine                                                                  | 12.255506  | - | - | - | 35.4574  | 282.278624 |
| POS08873 | 640551.1023 | 274581.1014 | -1.22208 | 0.057627 | 0.3326 | 0.45352 | (E)-Avenanthramide D                                                               | -2.134878  | - | - | - | 35.4574  | 284.285372 |
| POS08874 | 444257.8015 | 345452.6745 | -0.36291 | 0.291763 | 0.6058 | 0.16295 | Flumioxazin                                                                        | 0.841678   | - | - | - | 35.4574  | 355.339375 |
| POS08880 | 386459.914  | 3867072.315 | 3.322851 | 0.352224 | 0.6364 | 1.1284  | 4-nitrophenolate                                                                   | 12.782926  | - | - | - | 35.4549  | 139.112042 |
| POS08882 | 250097.1095 | 767400.301  | 1.617491 | 0.406767 | 0.6724 | 0.27528 | 2,8-Dihydroxyquinoline-beta-D-glucuronide                                          | 0.694521   | - | - | - | 35.4549  | 338.289011 |
| POS08884 | 33390.01151 | 17618.89883 | -0.92229 | 0.053755 | 0.3239 | 0.09085 | 3-O-Methylquercetin                                                                | -5.605128  | - | - | - | 35.4549  | 317.267804 |
| POS08885 | 266333.3829 | 192977.0365 | -0.4648  | 0.394691 | 0.6637 | 0.12619 | N,6-O-Disulfo-D-glucosamine                                                        | -4.9081808 | - | - | - | 35.4549  | 340.303111 |
| POS08886 | 152412.5998 | 86643.19515 | -0.81482 | 0.047427 | 0.3143 | 0.20159 | Molybdopterin precursor Z                                                          | 1.6977368  | - | - | - | 35.4549  | 345.205261 |
| POS08887 | 2604682.945 | 2256530.722 | -0.207   | 0.104303 | 0.4115 | 0.41582 | Myxochelin C                                                                       | -14.087884 | - | - | - | 35.4543  | 540.533576 |
| POS08888 | 223505.609  | 223768.5847 | 0.001696 | 0.995494 | 0.9977 | 0.01214 | Sodium methallylsulfote                                                            | -9.0491666 | - | - | - | 35.4543  | 159.157145 |
| POS08893 | 112956.72   | 91075.30597 | -0.31064 | 0.422006 | 0.6829 | 0.09776 | 5-[5,5-dimethoxy-4-(sulfoxy)benzoyloxy]-4,5-dihydroisobenzofuran-1-carboxylic acid | -10.400182 | - | - | - | 35.4511  | 403.283093 |
| POS08899 | 205608.071  | 204681.2873 | -0.00652 | 0.978738 | 0.9898 | 0.02499 | Endothal-disodium                                                                  | 20.671935  | - | - | - | 35.44665 | 231.137734 |
| POS08906 | 51937.67647 | 45544.3964  | -0.18951 | 0.434957 | 0.6931 | 0.03382 | riavonol 3-O-(alpha-L-rhamnosyl-(1-&gt;6)-beta-D-glucoside)                        | -4.2669899 | - | - | - | 35.4396  | 547.524845 |
| POS08908 | 27115.61597 | 45983.73254 | 0.762    | 0.132063 | 0.4516 | 0.10733 | Americanin B                                                                       | -4.6631647 | - | - | - | 35.43675 | 493.47908  |
| POS08912 | 1578969.32  | 996573.3619 | -0.66394 | 0.171679 | 0.4979 | 0.5027  | Pyrimidine 5'-nucleotide                                                           | -23.840859 | - | - | - | 35.4339  | 294.190687 |
| POS08914 | 75779.5607  | 69135.41191 | -0.13238 | 0.710791 | 0.8589 | 0.01931 | Lycoricidine                                                                       | -1.5118246 | - | - | - | 35.4339  | 292.262936 |

|          |             |             |          |          |        |         |                                                         |            |   |   |   |          |            |
|----------|-------------|-------------|----------|----------|--------|---------|---------------------------------------------------------|------------|---|---|---|----------|------------|
| POS08918 | 204359.0951 | 181085.8882 | -0.17443 | 0.455172 | 0.7083 | 0.07613 | L-Ascorbate 6-phosphate                                 | -4.3391204 | - | - | - | 35.41845 | 257.110165 |
| POS08919 | 903188.1112 | 816897.1126 | -0.14487 | 0.508992 | 0.7444 | 0.12964 | 3-Sulfocatechol                                         | -9.3689279 | - | - | - | 35.41845 | 191.179295 |
| POS08922 | 160255.6363 | 142550.179  | -0.16891 | 0.521785 | 0.7515 | 0.06506 | 5-Hydroxyisourate                                       | 0.8049117  | - | - | - | 35.4159  | 185.117125 |
| POS08923 | 195291.8185 | 91800.45303 | -1.08906 | 0.000516 | 0.0721 | 0.31207 | 2-methyl-1,4-naphthalenediol                            | 8.4672653  | - | - | - | 35.41395 | 335.165806 |
| POS08926 | 351916.1107 | 247202.1083 | -0.50954 | 0.225459 | 0.5471 | 0.22154 | 4-ethoxy-2-hydroxy-6-methoxyphenyl)oxidanesulfonic acid | 17.832597  | - | - | - | 35.403   | 247.241668 |
| POS08927 | 75007.32784 | 56971.93924 | -0.39678 | 0.315084 | 0.6245 | 0.08339 | Daunorubicin                                            | -5.4506058 | - | - | - | 35.403   | 528.524301 |
| POS08929 | 244472.1661 | 292763.5065 | 0.260066 | 0.706968 | 0.8568 | 0.0872  | D-Fructose 6-phosphate                                  | 19.308733  | - | - | - | 35.3998  | 261.148099 |
| POS08943 | 935774.1484 | 642998.2328 | -0.54135 | 0.015469 | 0.2226 | 0.45578 | 4-Hydroxy-4-methylglutamate                             | -19.91581  | - | - | - | 35.3547  | 178.158948 |
| POS08944 | 663845.0229 | 523952.3885 | -0.34141 | 0.287885 | 0.603  | 0.18677 | dTDP-3-amino-2,3,6-trideoxy-4-keto-D-glucose            | 17.926872  | - | - | - | 35.3547  | 530.346266 |
| POS08946 | 2504971.987 | 1291749.895 | -0.95547 | 0.039062 | 0.2955 | 0.86679 | Glutaminyhistidine                                      | -3.6264974 | - | - | - | 35.33645 | 284.294249 |
| POS08947 | 446109.5155 | 363061.6765 | -0.29718 | 0.109461 | 0.4204 | 0.20159 | (Z)-Resveratrol 3,4'-diglucoside                        | 9.0135601  | - | - | - | 35.33645 | 553.536757 |
| POS08949 | 193206.7386 | 186795.8488 | -0.04868 | 0.92773  | 0.9672 | 0.02629 | Dianthramine                                            | -0.5677252 | - | - | - | 35.3182  | 290.247312 |
| POS08951 | 64269.86095 | 45520.98974 | -0.49761 | 0.078371 | 0.3727 | 0.09905 | Pyranocyanin B                                          | 9.719127   | - | - | - | 35.3162  | 488.444814 |
| POS08953 | 15803116.43 | 12903069.19 | -0.29249 | 0.022724 | 0.2473 | 1.38042 | Pyrazimide                                              | 1.5106098  | - | - | - | 35.31315 | 124.120163 |
| POS08954 | 150924.2716 | 97190.1104  | -0.63494 | 0.019923 | 0.2381 | 0.19375 | DHAP(10:0)                                              | 18.014018  | - | - | - | 35.31315 | 325.320319 |
| POS08955 | 1432698.183 | 748190.9871 | -0.93726 | 0.096521 | 0.4017 | 0.58643 | c-DNP-Cys                                               | 19.147796  | - | - | - | 35.31285 | 330.299482 |
| POS08957 | 504745.1161 | 431341.3729 | -0.22672 | 0.124069 | 0.442  | 0.18039 | Pinocembrin 7-rhamnosylglucoside                        | -11.525513 | - | - | - | 35.29635 | 565.53597  |
| POS08958 | 412643.5033 | 202943.1301 | -1.02382 | 0.058728 | 0.3352 | 0.3454  | 6-Thioinosinic acid                                     | -5.9300292 | - | - | - | 35.2909  | 285.297591 |
| POS08959 | 123602.3896 | 86395.07899 | -0.51669 | 0.208787 | 0.5323 | 0.11519 | Hydroxypyruvate                                         | 9.4265525  | - | - | - | 35.2799  | 105.069758 |
| POS08960 | 197940.6872 | 843983.8512 | 2.092147 | 0.394446 | 0.6634 | 0.31786 | 3',5'-Cyclic AMP                                        | -23.820926 | - | - | - | 35.2738  | 330.205335 |
| POS08962 | 861103.507  | 462206.1448 | -0.89765 | 0.316344 | 0.6253 | 0.39796 | 4-Hydroxy-3-nitrosobenzamide                            | 9.9310351  | - | - | - | 35.2636  | 167.143026 |
| POS08963 | 151563.7377 | 114589.0138 | -0.40346 | 0.088214 | 0.3878 | 0.14602 | D-Lombricine                                            | 1.3288911  | - | - | - | 35.2636  | 271.187936 |
| POS08965 | 1718213.676 | 1578531.03  | -0.12233 | 0.83102  | 0.9228 | 0.03806 | Fraxetin                                                | -9.4826296 | - | - | - | 35.25915 | 209.172803 |





|          |             |             |          |          |        |         |                                                                                                               |            |   |   |   |          |            |
|----------|-------------|-------------|----------|----------|--------|---------|---------------------------------------------------------------------------------------------------------------|------------|---|---|---|----------|------------|
| POS09039 | 199480.5296 | 116237.8426 | -0.77917 | 0.18262  | 0.5082 | 0.19299 | 3,4-Dihydroxyphthalate                                                                                        | -21.957477 | - | - | - | 35.13405 | 199.132526 |
| POS09043 | 83545.90352 | 39855.0306  | -1.06781 | 0.049256 | 0.3185 | 0.15309 | Gonyautoxin 5                                                                                                 | -15.459706 | - | - | - | 35.13    | 380.351112 |
| POS09045 | 104125.9904 | 94763.57858 | -0.13593 | 0.709032 | 0.8579 | 0.02381 | 4-Deoxy-beta-D-gluc-4-enuronosyl-(1,3)-N-acetyl-3,4,5-trihydroxyphenyl-3,5,7-trihydroxy-6-[3,4,5-trihydroxy-6 | -23.830862 | - | - | - | 35.1296  | 380.314837 |
| POS09050 | 225098.3617 | 136260.863  | -0.72418 | 0.070489 | 0.3575 | 0.22008 | {3,5,7-trihydroxy-6-[3,4,5-trihydroxy-6                                                                       | 20.521781  | - | - | - | 35.1282  | 613.556847 |
| POS09052 | 124461.2526 | 95471.47452 | -0.38256 | 0.17373  | 0.5    | 0.12524 | Etobenzanid                                                                                                   | 5.2296142  | - | - | - | 35.1273  | 341.210256 |
| POS09053 | 252447.1937 | 225049.3126 | -0.16574 | 0.378575 | 0.6529 | 0.08666 | N(beta)-Epoxysuccinoyl-DAP                                                                                    | 16.48049   | - | - | - | 35.12645 | 218.190156 |
| POS09058 | 47792.81386 | 45802.65194 | -0.06136 | 0.855291 | 0.9345 | 0.00445 | Alkaloid RC                                                                                                   | -15.751363 | - | - | - | 35.12555 | 532.507505 |
| POS09063 | 714318.6202 | 239438.7522 | -1.57691 | 0.06118  | 0.3403 | 0.54364 | Voriconazole                                                                                                  | 22.010417  | - | - | - | 35.12125 | 350.325465 |
| POS09064 | 736038.1763 | 723274.0654 | -0.02524 | 0.9221   | 0.9648 | 0.02144 | N-[4-hydroxy-(E)-cinnamoyl]-L-aspartic acid                                                                   | -17.71143  | - | - | - | 35.1196  | 280.247731 |
| POS09068 | 145997.5942 | 138691.7307 | -0.07406 | 0.845209 | 0.9297 | 0.03319 | Dichlorophenolindophenol                                                                                      | -0.166867  | - | - | - | 35.1196  | 271.118632 |
| POS09070 | 272957.486  | 107981.5827 | -1.33789 | 0.001761 | 0.0956 | 0.37296 | 1H-isochromene-3-one                                                                                          | -4.7336646 | - | - | - | 35.1196  | 367.283543 |
| POS09075 | 259242.6321 | 259201.4317 | -0.00023 | 0.999014 | 0.9997 | 0.00526 | 3,5,6-trihydroxyoxan-4-one                                                                                    | 1.3247448  | - | - | - | 35.11145 | 399.324804 |
| POS09077 | 460953.3857 | 481094.456  | 0.061699 | 0.95212  | 0.9791 | 0.02456 | Potassium dichromate                                                                                          | -4.4765351 | - | - | - | 35.1095  | 295.19056  |
| POS09078 | 151628.684  | 80153.21117 | -0.91971 | 0.007203 | 0.1779 | 0.22583 | N-benzoylglycinate                                                                                            | 22.806181  | - | - | - | 35.1095  | 179.17934  |
| POS09080 | 228570.0997 | 145691.5509 | -0.64972 | 0.45483  | 0.7083 | 0.14158 | 3-Epihydroxymugineic acid                                                                                     | 21.272067  | - | - | - | 35.1077  | 337.30963  |
| POS09081 | 101139.6647 | 102261.7223 | 0.015917 | 0.966224 | 0.9843 | 0.01632 | Cefuroxime axetil                                                                                             | 15.343765  | - | - | - | 35.1077  | 511.489609 |
| POS09083 | 66402.48334 | 1126776.406 | 4.08482  | 0.337396 | 0.6326 | 0.452   | 2-Deoxy-D-ribose 1,5-bisphosphate                                                                             | 13.234813  | - | - | - | 35.1059  | 295.101469 |
| POS09090 | 232118.8946 | 206324.0341 | -0.16995 | 0.613988 | 0.8079 | 0.06748 | Chlorhexidine acetate                                                                                         | 19.191702  | - | - | - | 35.1     | 626.569782 |
| POS09103 | 205582.6882 | 189780.2178 | -0.11539 | 0.788678 | 0.9028 | 0.02716 | alpha, alpha'-Trehalose 6-phosphate                                                                           | 10.721026  | - | - | - | 35.0562  | 423.288204 |
| POS09108 | 84327.34167 | 83376.83174 | -0.01635 | 0.943591 | 0.9747 | 0.00414 | 2-Hydroxy-6-oxono-2,4-diene-1,9-dioate                                                                        | 0.6901933  | - | - | - | 35.053   | 215.179524 |
| POS09110 | 138778.3593 | 52226.28782 | -1.40993 | 0.005114 | 0.1518 | 0.26645 | Arborinine                                                                                                    | -2.7702814 | - | - | - | 35.0524  | 286.301086 |
| POS09111 | 156652.6422 | 121898.1909 | -0.36189 | 0.155853 | 0.4841 | 0.12737 | 2-bromo-5-hydroxy-N-(2-(4-hydroxyphenyl)ethyl)-L-phenylalanine                                                | 3.0198202  | - | - | - | 35.0524  | 381.241525 |
| POS09113 | 115454.7223 | 93755.25796 | -0.30036 | 0.257095 | 0.5751 | 0.08928 | L-phenylalanine [(carboxymethyl)-L-hydroxycarbonyl]amide                                                      | -15.772415 | - | - | - | 35.03615 | 560.538451 |

|          |             |             |          |          |        |         |                                                                                                                                                                           |            |   |   |   |          |            |
|----------|-------------|-------------|----------|----------|--------|---------|---------------------------------------------------------------------------------------------------------------------------------------------------------------------------|------------|---|---|---|----------|------------|
| POS09115 | 175619.904  | 143635.1686 | -0.29005 | 0.304414 | 0.6169 | 0.10727 | N-debutylhalofantrine                                                                                                                                                     | 12.836564  | - | - | - | 35.03395 | 445.32998  |
| POS09119 | 452415.4032 | 379329.644  | -0.2542  | 0.218994 | 0.54   | 0.15222 | L-2-amino-4-((1-<br>[(carboxymethyl)-C-<br>hydroxymethyl]amido)-2-<br>1-Methylseleno-N-acetyl-<br>D-galactosamine                                                         | 21.308865  | - | - | - | 35.02535 | 594.579925 |
| POS09124 | 388206.6529 | 365893.921  | -0.0854  | 0.73462  | 0.8742 | 0.05149 | D-Erythritol 4-phosphate                                                                                                                                                  | -7.4097129 | - | - | - | 35.00615 | 299.200067 |
| POS09126 | 217343.9858 | 199613.0693 | -0.12277 | 0.725795 | 0.8684 | 0.07419 | Metsulfuron-methyl                                                                                                                                                        | -2.8069464 | - | - | - | 35.0022  | 203.106409 |
| POS09128 | 68874.64434 | 60081.19492 | -0.19706 | 0.577518 | 0.7844 | 0.02793 | Primisulfuron                                                                                                                                                             | -10.605865 | - | - | - | 34.9983  | 382.367032 |
| POS09129 | 223031.9862 | 185336.6669 | -0.2671  | 0.390304 | 0.6604 | 0.08378 | Pravastatin 3-O-beta-D-<br>glucosyl-(1-&gt;2)-beta-<br>D-glucoside                                                                                                        | -7.3792332 | - | - | - | 34.9983  | 455.314324 |
| POS09130 | 351563.7261 | 247938.3153 | -0.5038  | 0.025883 | 0.2573 | 0.25942 | Clitocine                                                                                                                                                                 | -13.049018 | - | - | - | 34.9983  | 563.519236 |
| POS09131 | 165228.279  | 136254.584  | -0.27816 | 0.427066 | 0.6863 | 0.0726  | 5-Amino-6-(5-<br>phosphoribosylamino)uracil                                                                                                                               | -16.778258 | - | - | - | 34.99545 | 288.231857 |
| POS09133 | 87034.16728 | 53679.86512 | -0.6972  | 0.093118 | 0.3958 | 0.13821 | 5-FU                                                                                                                                                                      | 22.524278  | - | - | - | 34.9921  | 355.225855 |
| POS09134 | 634937.4663 | 569447.1058 | -0.15705 | 0.336597 | 0.6326 | 0.11382 | L-((1-hydroxy(1,3,4,6,9,10-<br>pentahydroxy-6-oxo-6H-<br>benzopyridin-2(1H)-<br>1,4,5-trihydroxy-6-((2,3,5-<br>trihydroxy-6-((3-<br>methoxy-2-<br>O-methylgalactaric acid | 8.3015626  | - | - | - | 34.9921  | 131.085556 |
| POS09135 | 121300.6532 | 60553.87325 | -1.0023  | 0.073411 | 0.3635 | 0.17845 | UDP-3-ketoglucose                                                                                                                                                         | -12.511555 | - | - | - | 34.9921  | 378.263556 |
| POS09139 | 281988.547  | 273381.2265 | -0.04472 | 0.834549 | 0.9243 | 0.00685 | Streptomycin                                                                                                                                                              | 12.830449  | - | - | - | 34.95475 | 457.366132 |
| POS09140 | 43774.28067 | 44638.84666 | 0.028216 | 0.95438  | 0.98   | 0.00651 | CGP 28-392                                                                                                                                                                | -16.179668 | - | - | - | 34.9329  | 565.284047 |
| POS09142 | 717119.9044 | 577189.9264 | -0.31317 | 0.099368 | 0.4055 | 0.25852 | 5,4,3-trihydroxy-6-((1,3-(6-<br>hydroxy-7-methoxy-2H-<br>1,3-benzoxazin-2(1H)-<br>5-ylideneamino)-5-<br>tetrahydrooxan-2-<br>yl)methoxy)propanoic acid                    | -2.4220384 | - | - | - | 34.9226  | 582.579968 |
| POS09143 | 265449.7566 | 145262.78   | -0.86977 | 0.018349 | 0.2285 | 0.30735 | Kuwanon Z                                                                                                                                                                 | 0.7845981  | - | - | - | 34.9187  | 366.335663 |
| POS09144 | 194996.1192 | 172649.9339 | -0.1756  | 0.571205 | 0.7803 | 0.06205 | (+)-Luguine                                                                                                                                                               | -13.820064 | - | - | - | 34.9123  | 415.320551 |
| POS09145 | 419776.1129 | 436846.2077 | 0.057505 | 0.928524 | 0.9674 | 0.02127 | UK-47265                                                                                                                                                                  | -12.034324 | - | - | - | 34.9123  | 267.206073 |
| POS09146 | 140887.1635 | 139447.0115 | -0.01482 | 0.957926 | 0.981  | 0.00405 | 2-O-Galloylgalactaric acid                                                                                                                                                | 4.3348076  | - | - | - | 34.9123  | 363.251947 |
| POS09150 | 141615.1462 | 127327.7439 | -0.15343 | 0.591426 | 0.7918 | 0.04001 | Lichenin                                                                                                                                                                  | 20.061582  | - | - | - | 34.9078  | 595.583404 |
| POS09152 | 1092726.36  | 88740.23756 | -3.6222  | 0.184387 | 0.5108 | 0.66127 | hesperetin 3'-O-sulfate                                                                                                                                                   | -23.129278 | - | - | - | 34.9033  | 336.309721 |
| POS09154 | 220591.3904 | 185510.1884 | -0.24988 | 0.376345 | 0.6512 | 0.09449 |                                                                                                                                                                           | 11.395053  | - | - | - | 34.9033  | 340.191142 |
| POS09155 | 973537.3169 | 715235.5064 | -0.44482 | 0.035478 | 0.2845 | 0.38572 |                                                                                                                                                                           | 1.034007   | - | - | - | 34.9033  | 163.148044 |
| POS09161 | 107170.8923 | 44653.10447 | -1.26308 | 0.022408 | 0.2466 | 0.21763 |                                                                                                                                                                           | 3.812064   | - | - | - | 34.8891  | 383.350734 |

|          |             |             |          |          |        |         |                                                                              |            |   |   |   |          |            |
|----------|-------------|-------------|----------|----------|--------|---------|------------------------------------------------------------------------------|------------|---|---|---|----------|------------|
| POS09162 | 315740.4739 | 257253.1357 | -0.29555 | 0.0904   | 0.3896 | 0.16639 | Orotidine                                                                    | -9.1916864 | - | - | - | 34.88835 | 289.215527 |
| POS09165 | 107229.5581 | 122543.1172 | 0.192587 | 0.518702 | 0.7497 | 0.05119 | 1,2,3,4,6,7,8-<br>Heptachlorodibenzofuran                                    | -4.130157  | - | - | - | 34.8743  | 410.312286 |
| POS09170 | 2486735.622 | 1928421.459 | -0.36683 | 0.11082  | 0.4228 | 0.53265 | Isosorbide mononitrate                                                       | 0.3994756  | - | - | - | 34.8546  | 192.146153 |
| POS09173 | 155032.6437 | 115625.1784 | -0.42312 | 0.292595 | 0.6073 | 0.10809 | Propicozole                                                                  | -5.2021517 | - | - | - | 34.84455 | 343.225896 |
| POS09175 | 713645.24   | 614314.4692 | -0.21623 | 0.335825 | 0.6326 | 0.17118 | 1D-1-Guanidino-3-amino-<br>1,3-dideoxy-scyllo-inositol                       | 6.6021501  | - | - | - | 34.8438  | 301.215459 |
| POS09176 | 177084.5117 | 103800.2433 | -0.77063 | 0.143323 | 0.4679 | 0.17389 | 1,2,6-Diisopropoxy-3-(1-<br>hydroxy-4-oxo-4H-<br>chromen-2                   | -14.88231  | - | - | - | 34.8438  | 367.301825 |
| POS09177 | 144236.3257 | 77835.57941 | -0.88993 | 0.065127 | 0.3462 | 0.1807  | Molybdopterin                                                                | 16.798092  | - | - | - | 34.8438  | 396.365718 |
| POS09180 | 223927.2777 | 171890.1721 | -0.38154 | 0.022066 | 0.2454 | 0.17489 | O-Carbamoyladenylate                                                         | 22.813685  | - | - | - | 34.84185 | 391.26218  |
| POS09181 | 354521.6044 | 205277.3509 | -0.7883  | 0.078869 | 0.3736 | 0.25962 | 5-Hydroxytryptophol<br>glucuronide                                           | -0.5208792 | - | - | - | 34.84185 | 340.3475   |
| POS09182 | 168770.2164 | 134766.8124 | -0.3246  | 0.474399 | 0.7206 | 0.09977 | 5-(2'-Carboxyethyl)-4,6-<br>dihydroxypicolite                                | -16.207134 | - | - | - | 34.8399  | 228.174495 |
| POS09185 | 198573.7508 | 142120.0692 | -0.48256 | 0.129819 | 0.4485 | 0.16603 | 2-(2,5-dimethoxy-4-<br>methoxyphenyl)-3,5,6,7-<br>tetrahydroxy-4H-chroman    | 6.7353356  | - | - | - | 34.83835 | 349.272622 |
| POS09186 | 3876834.162 | 2135007.665 | -0.86064 | 0.045018 | 0.3112 | 0.94288 | 1,2,6-Diisopropoxy-3-(3'-<br>phenylpropanoyl)phenyllo<br>vidanesulfonic acid | 20.880515  | - | - | - | 34.83765 | 339.344341 |
| POS09187 | 17928339.45 | 9894325.314 | -0.85757 | 0.046322 | 0.3134 | 2.02114 | Atheroline                                                                   | 22.344038  | - | - | - | 34.83765 | 338.340914 |
| POS09189 | 121947.3547 | 90968.43202 | -0.42282 | 0.096762 | 0.4024 | 0.14273 | 2-(2,4-dimethoxy-5-<br>methoxyphenyl)-3,5,7-<br>trihydroxy-4H-chroman-4      | 20.607056  | - | - | - | 34.831   | 333.278124 |
| POS09190 | 552587.52   | 484577.5451 | -0.18948 | 0.668176 | 0.8368 | 0.08463 | 3-Deoxy-D-manno-<br>octulosote 8-phosphate                                   | -15.102772 | - | - | - | 34.83025 | 319.174371 |
| POS09191 | 305012.281  | 296450.9114 | -0.04107 | 0.802641 | 0.91   | 0.00239 | Pyridoxamine phosphate                                                       | 17.026441  | - | - | - | 34.83025 | 249.184502 |
| POS09193 | 234161.6726 | 434177.8854 | 0.890781 | 0.38347  | 0.6571 | 0.18399 | 5-Fluorouridine                                                              | 4.222714   | - | - | - | 34.82605 | 263.200184 |
| POS09202 | 94945.19654 | 66393.06509 | -0.51606 | 0.12247  | 0.4401 | 0.11192 | 5-methylendioctylol 1-<br>[glucosyl-(1-&gt;4)-<br>galactoside]               | 9.1986238  | - | - | - | 34.8113  | 627.57304  |
| POS09203 | 115788.2282 | 69583.81059 | -0.73466 | 0.098608 | 0.4049 | 0.15408 | D-Glucosamine                                                                | -20.717923 | - | - | - | 34.80975 | 180.174665 |
| POS09205 | 235244.0951 | 92821.01178 | -1.34164 | 0.090544 | 0.39   | 0.27054 | 0-(2H-1,3-benzoxazinone-3-<br>carbonyloxy)-3,4,5-<br>trihydroxybenzene       | -2.0163086 | - | - | - | 34.80665 | 343.262587 |
| POS09207 | 73295.71471 | 55333.22443 | -0.40558 | 0.321831 | 0.629  | 0.07353 | THF-L-glutamate                                                              | 11.099264  | - | - | - | 34.80555 | 575.556854 |
| POS09208 | 221314.6611 | 271979.736  | 0.2974   | 0.511806 | 0.7452 | 0.10944 | Chlorophyll b                                                                | 19.277099  | - | - | - | 34.80485 | 909.52379  |
| POS09211 | 223841.6806 | 146721.8781 | -0.60939 | 0.18943  | 0.5161 | 0.17827 | Bis(4'-<br>chlorophenyl)methane                                              | -23.785944 | - | - | - | 34.7944  | 238.126136 |

|          |             |             |          |          |        |         |                                                              |            |   |   |   |          |            |
|----------|-------------|-------------|----------|----------|--------|---------|--------------------------------------------------------------|------------|---|---|---|----------|------------|
| POS09213 | 237640.0702 | 130426.9822 | -0.86554 | 0.079813 | 0.3742 | 0.21955 | (S)-dicyclohexyl-2,2-dimethyl-3,4-dihydro-2H-1-benzoxepin    | -8.435671  | - | - | - | 34.793   | 321.314575 |
| POS09215 | 209923.0739 | 8908879.915 | 5.407311 | 0.34386  | 0.6332 | 1.79501 | Catechol                                                     | -10.151815 | - | - | - | 34.79215 | 111.116759 |
| POS09217 | 546995.9906 | 374000.6751 | -0.54849 | 0.040901 | 0.2988 | 0.31513 | Procymidone                                                  | -13.708876 | - | - | - | 34.7852  | 285.141281 |
| POS09220 | 560539.839  | 433727.0288 | -0.37003 | 0.108908 | 0.4191 | 0.24405 | 2-Carboxy-2-hydroxy-8-carboxychromene                        | -1.9452336 | - | - | - | 34.7793  | 237.184417 |
| POS09224 | 152000.5867 | 128232.8458 | -0.24531 | 0.195317 | 0.5208 | 0.10042 | Diflufenican                                                 | -22.991594 | - | - | - | 34.77585 | 395.293111 |
| POS09230 | 124480.7907 | 91895.83578 | -0.43785 | 0.476107 | 0.7213 | 0.06884 | N-(6-oxo-6H-dibenzo[b,d]pyran-3-yl)-2,2,2-trifluoroacetamide | -5.8466578 | - | - | - | 34.7671  | 308.22958  |
| POS09232 | 117228.3115 | 99235.49236 | -0.24039 | 0.200755 | 0.5255 | 0.0818  | Pyriprole                                                    | -18.795221 | - | - | - | 34.7665  | 495.266487 |
| POS09235 | 434909.4716 | 227799.9853 | -0.93295 | 0.237527 | 0.5573 | 0.28643 | Daphnoretin                                                  | 6.4116468  | - | - | - | 34.74395 | 353.303935 |
| POS09237 | 693864.6989 | 654480.3844 | -0.0843  | 0.643424 | 0.8248 | 0.07888 | L-Galacturonic acid calcium salt                             | 18.144735  | - | - | - | 34.7302  | 427.355912 |
| POS09239 | 228272.3111 | 193088.0549 | -0.2415  | 0.257585 | 0.5759 | 0.10693 | L-lysine [(carboxymethyl)-C-hydroxymethyl] dihydrochloride   | 6.6067939  | - | - | - | 34.7187  | 610.611304 |
| POS09241 | 106755.3398 | 101778.5113 | -0.06888 | 0.900534 | 0.9541 | 0.00455 | Dinicozole                                                   | 7.5906862  | - | - | - | 34.7152  | 327.230753 |
| POS09242 | 156721.2153 | 108444.8748 | -0.53124 | 0.128018 | 0.4468 | 0.15114 | 2-O-Galloyl-1,4-galactarolactone                             | 18.517057  | - | - | - | 34.7152  | 345.241451 |
| POS09244 | 120838.9355 | 131297.1405 | 0.11975  | 0.6566   | 0.8314 | 0.04485 | Mometasone                                                   | -21.33257  | - | - | - | 34.7112  | 428.35946  |
| POS09246 | 1033665.816 | 425175.8066 | -1.28164 | 0.088042 | 0.3875 | 0.57014 | Prusin                                                       | -3.3895165 | - | - | - | 34.7072  | 296.294176 |
| POS09253 | 549596.286  | 441563.0374 | -0.31575 | 0.455082 | 0.7083 | 0.1682  | D-Ribitol 5-phosphate                                        | 21.025024  | - | - | - | 34.6697  | 233.137857 |
| POS09254 | 181003.1477 | 129409.9665 | -0.48407 | 0.310901 | 0.6218 | 0.16321 | Fluorodifen                                                  | 7.9698677  | - | - | - | 34.668   | 329.210192 |
| POS09256 | 69343.18557 | 2019304.236 | 4.86396  | 0.324499 | 0.6309 | 0.62909 | 2,4-Dinitro-1-(3-nitrophenoxy)benzene                        | -5.0663361 | - | - | - | 34.6593  | 306.20563  |
| POS09264 | 131185.8376 | 110256.1796 | -0.25075 | 0.67176  | 0.8378 | 0.03749 | Furaneol 4-(6-malonylglucoside)                              | 1.5263981  | - | - | - | 34.60435 | 377.320551 |
| POS09265 | 230613.3594 | 194181.4752 | -0.24807 | 0.436759 | 0.6943 | 0.10148 | Termilin                                                     | -16.771024 | - | - | - | 34.60375 | 603.366574 |
| POS09266 | 1125650.598 | 888812.89   | -0.34081 | 0.085537 | 0.3848 | 0.33684 | L-Protocatecholphloroglucinol                                | -18.551732 | - | - | - | 34.6018  | 307.225996 |
| POS09267 | 76548.07483 | 35987.98606 | -1.08885 | 0.031586 | 0.2737 | 0.15155 | 1-Hydroxyrutacridone epoxide                                 | 22.849363  | - | - | - | 34.6018  | 340.35703  |
| POS09270 | 58655.81217 | 85287.95149 | 0.540068 | 0.515303 | 0.7477 | 0.08301 | TG(18:0/22:5(4Z,7Z,10Z,13Z,16Z)/18:0)                        | 10.835839  | - | - | - | 34.59625 | 938.524035 |
| POS09273 | 230751.7883 | 129411.7295 | -0.83437 | 0.044195 | 0.3084 | 0.22554 | 2-S-Glutathionyl acetate                                     | 14.483199  | - | - | - | 34.5853  | 366.372168 |

|          |             |             |          |          |        |         |                                                                                               |            |   |   |   |          |            |
|----------|-------------|-------------|----------|----------|--------|---------|-----------------------------------------------------------------------------------------------|------------|---|---|---|----------|------------|
| POS09276 | 157720.604  | 88843.76999 | -0.82803 | 0.272683 | 0.5901 | 0.15379 | N2-Citryl-N6-acetyl-N6-hydroxy-L-lysine                                                       | -20.300126 | - | - | - | 34.5748  | 379.331496 |
| POS09277 | 8714.332662 | 2256.766779 | -1.94913 | 0.114502 | 0.4283 | 0.05445 | Asparenomycin A                                                                               | 3.4149377  | - | - | - | 34.57275 | 341.360039 |
| POS09282 | 811819.8493 | 393081.4167 | -1.04633 | 0.05348  | 0.3235 | 0.48308 | Longifolonine                                                                                 | -9.1078939 | - | - | - | 34.5688  | 298.309869 |
| POS09285 | 127846.1412 | 100581.7562 | -0.34604 | 0.36034  | 0.6431 | 0.09659 | C.I. Pigment Blue 63                                                                          | -22.844653 | - | - | - | 34.5688  | 450.368011 |
| POS09295 | 131541.1828 | 197702.2655 | 0.587815 | 0.562242 | 0.776  | 0.13129 | 3,3'-Biflaviolin                                                                              | -15.999356 | - | - | - | 34.5439  | 411.288112 |
| POS09296 | 133414.8443 | 76515.75201 | -0.80209 | 0.201377 | 0.5258 | 0.15321 | 2-((2-nyaroxy(6-nyaroxy-1,3-dimethoxy-2H-1,3-benzodioxol-5-yl)oxy)oxy)oxane-2-carboxylic acid | 18.462956  | - | - | - | 34.5439  | 270.221247 |
| POS09298 | 678160.3206 | 546227.5647 | -0.31212 | 0.074354 | 0.3656 | 0.27011 | hydroxyacetyl]oxane-2-carboxylic acid                                                         | -11.696276 | - | - | - | 34.54015 | 253.179327 |
| POS09299 | 76936.10072 | 70247.72254 | -0.13121 | 0.571829 | 0.7807 | 0.04251 | Atalanine                                                                                     | -4.3763764 | - | - | - | 34.54015 | 611.614604 |
| POS09302 | 25388.0431  | 13577.5562  | -0.90293 | 0.202189 | 0.5265 | 0.06006 | Glycyrol                                                                                      | 11.514226  | - | - | - | 34.5252  | 367.375495 |
| POS09303 | 687768.3132 | 474931.0299 | -0.5342  | 0.663222 | 0.834  | 0.17412 | 2-((4-nyaroxy-3-(sulfooxy)phenyl]acetic acid                                                  | 14.390437  | - | - | - | 34.5115  | 249.220848 |
| POS09306 | 229383.4285 | 216510.3581 | -0.08333 | 0.803799 | 0.9105 | 0.00282 | Diethylstilbestrol diphosphate                                                                | -0.8017696 | - | - | - | 34.5115  | 429.316933 |
| POS09311 | 66440.18473 | 59400.90367 | -0.16157 | 0.584317 | 0.7882 | 0.0341  | riavanone 1-β-D-galactopyranosyl-(1-&gt;2)-beta-D-glucoside                                   | -10.531746 | - | - | - | 34.5025  | 549.5373   |
| POS09312 | 64060.96889 | 49640.37459 | -0.36793 | 0.249354 | 0.5669 | 0.06455 | Cefotetan disodium                                                                            | 8.399372   | - | - | - | 34.5025  | 620.595081 |
| POS09313 | 425752.9309 | 401685.3848 | -0.08395 | 0.529227 | 0.7568 | 0.05431 | L-Selenomethionine                                                                            | 18.669239  | - | - | - | 34.5024  | 197.117238 |
| POS09321 | 120210.2    | 79776.86169 | -0.59152 | 0.056316 | 0.3284 | 0.15556 | Cyfluthrin                                                                                    | -15.02439  | - | - | - | 34.4854  | 435.288352 |
| POS09328 | 76312.4642  | 63500.38246 | -0.26515 | 0.387596 | 0.6585 | 0.06078 | Amisulbrom                                                                                    | 2.529007   | - | - | - | 34.47945 | 467.314256 |
| POS09329 | 68993.53216 | 45375.82207 | -0.60454 | 0.118093 | 0.433  | 0.11242 | Kanokoside D                                                                                  | -9.0630042 | - | - | - | 34.47855 | 625.630316 |
| POS09330 | 161274.5328 | 124584.0156 | -0.3724  | 0.310528 | 0.6217 | 0.11076 | Aluminum acetoacetate                                                                         | -15.294557 | - | - | - | 34.4773  | 331.225826 |
| POS09332 | 138976.5032 | 233445.7434 | 0.748246 | 0.413164 | 0.6774 | 0.11962 | 5-Hydroxysulfamethoxazole                                                                     | -20.954906 | - | - | - | 34.4773  | 270.278634 |
| POS09334 | 135725.4674 | 44428.75813 | -1.61113 | 0.000719 | 0.0721 | 0.27645 | 1-(3-nyaroxy-3-methoxyphenyl)-2-(2-hydroxyphenyl)ethanol                                      | -20.32433  | - | - | - | 34.47545 | 341.350359 |
| POS09336 | 505032.3246 | 431716.5691 | -0.22629 | 0.275298 | 0.5921 | 0.16072 | Adenosylselenomethionin                                                                       | -4.7277917 | - | - | - | 34.4636  | 447.345466 |
| POS09337 | 119438.5537 | 123353.7735 | 0.046533 | 0.87189  | 0.9428 | 0.02073 | Myricatin                                                                                     | 9.6728654  | - | - | - | 34.4636  | 553.43062  |
| POS09338 | 304857.8116 | 227530.1936 | -0.42208 | 0.410051 | 0.6751 | 0.17599 | Fospropofol                                                                                   | -18.656385 | - | - | - | 34.46185 | 333.241378 |

|          |             |             |          |          |        |         |                                                                                                                                                                   |            |   |   |   |          |            |
|----------|-------------|-------------|----------|----------|--------|---------|-------------------------------------------------------------------------------------------------------------------------------------------------------------------|------------|---|---|---|----------|------------|
| POS09339 | 241726.1633 | 205026.445  | -0.23756 | 0.122668 | 0.4403 | 0.13161 | Benzoyl meso-tartaric acid                                                                                                                                        | -20.198105 | - | - | - | 34.4534  | 255.195042 |
| POS09343 | 176559.0199 | 137630.0475 | -0.35936 | 0.123046 | 0.441  | 0.13449 | N-Acetyl-L-2-amino-6-oxopimelate                                                                                                                                  | -17.715237 | - | - | - | 34.4518  | 232.205781 |
| POS09344 | 551762.2749 | 171188.4308 | -1.68846 | 0.116162 | 0.4311 | 0.41274 | EDTA                                                                                                                                                              | -9.995976  | - | - | - | 34.4504  | 293.246955 |
| POS09346 | 312060.7522 | 364188.4692 | 0.222858 | 0.635042 | 0.8188 | 0.0475  | Streptomine phosphate                                                                                                                                             | -17.780454 | - | - | - | 34.44915 | 259.168986 |
| POS09352 | 291810.5147 | 229718.3984 | -0.34517 | 0.102275 | 0.4084 | 0.16994 | cis-(Homo)3-aconitate                                                                                                                                             | -1.538614  | - | - | - | 34.4431  | 217.194944 |
| POS09360 | 122300.6731 | 83867.44178 | -0.54425 | 0.134014 | 0.4544 | 0.13732 | 5-Amino-6-(5'-phospho-D-riboitylamino)uracil                                                                                                                      | 21.657675  | - | - | - | 34.4213  | 357.241392 |
| POS09361 | 136059.8812 | 121119.9585 | -0.16781 | 0.644622 | 0.8254 | 0.04726 | Demethylpremithramycin                                                                                                                                            | -5.9883317 | - | - | - | 34.42115 | 401.340479 |
| POS09362 | 65170.24708 | 61880.27876 | -0.07473 | 0.84368  | 0.9289 | 0.02619 | DTDP-alpha-D-glucose(2-)                                                                                                                                          | -19.096913 | - | - | - | 34.4206  | 563.309638 |
| POS09365 | 149613.0217 | 93645.92581 | -0.67595 | 0.061843 | 0.3409 | 0.19778 | Mefloquine                                                                                                                                                        | -0.0293684 | - | - | - | 34.4079  | 379.319465 |
| POS09367 | 156124.0673 | 127766.6034 | -0.28918 | 0.464538 | 0.7141 | 0.08548 | 5,4,5-trinyaroxy-0-(1,5-(0-hydroxy-7-methoxy-2H-1,2-benzodioxol-4-(5-oxooxolan-2-(4-methylphenyl)-5-oxo-1,4-dihydroxy-(E)-cinnamoyl) alpha-L-arabinofuranosyl) (1 | -17.461845 | - | - | - | 34.3957  | 417.335007 |
| POS09370 | 18010.40358 | 15961.89736 | -0.1742  | 0.515491 | 0.7477 | 0.02343 | oxooxolan-2-                                                                                                                                                      | -11.783411 | - | - | - | 34.3747  | 303.303714 |
| POS09372 | 315404.1395 | 226336.2657 | -0.47873 | 0.012834 | 0.21   | 0.25041 | cinnamoyl) alpha-L-                                                                                                                                               | -12.868458 | - | - | - | 34.369   | 561.501964 |
| POS09374 | 355891.6149 | 307182.1854 | -0.21234 | 0.363618 | 0.6446 | 0.13697 | Rhein                                                                                                                                                             | -24.406359 | - | - | - | 34.3608  | 285.22074  |
| POS09377 | 84123.2624  | 51622.89114 | -0.70449 | 0.026771 | 0.2585 | 0.14784 | 4-(4-Deoxy-beta-D-gluc-4-enuronosyl)-D-galacturote                                                                                                                | -24.255448 | - | - | - | 34.3556  | 353.246933 |
| POS09378 | 262447.3336 | 232843.9737 | -0.17266 | 0.525129 | 0.7541 | 0.05893 | Hexahydroxydiphenylara                                                                                                                                            | 11.675751  | - | - | - | 34.3548  | 453.335058 |
| POS09381 | 1399426.154 | 677111.2764 | -1.04737 | 0.219405 | 0.5402 | 0.5106  | 4,8-dihydroxy-2H-furo[2,3-h]chromen-2-one                                                                                                                         | 12.516037  | - | - | - | 34.3389  | 219.174007 |
| POS09383 | 171572.8732 | 157897.4795 | -0.11983 | 0.475697 | 0.721  | 0.05175 | 5,4,5-trinyaroxy-0-(1,2-(4-methoxy-1-benzofuran-5-                                                                                                                | -5.5987886 | - | - | - | 34.3389  | 397.309058 |
| POS09386 | 200154.138  | 145988.9282 | -0.45525 | 0.279957 | 0.5958 | 0.14506 | 2-(2,5-dihydroxy-4-methoxyphenyl)-3,5,6,7-tetrahydro-2,4-dihydro-                                                                                                 | 6.4382203  | - | - | - | 34.3345  | 351.288532 |
| POS09388 | 294837.1506 | 152892.1284 | -0.9474  | 0.387444 | 0.6585 | 0.24233 | 5-Fluorodeoxyuridine                                                                                                                                              | 23.163141  | - | - | - | 34.3301  | 247.205379 |
| POS09390 | 138107.2494 | 128866.9522 | -0.09991 | 0.550963 | 0.7699 | 0.04195 | Tuliposide B                                                                                                                                                      | 0.7649863  | - | - | - | 34.33    | 295.262702 |
| POS09391 | 443780.3536 | 268477.1106 | -0.72505 | 0.26653  | 0.5831 | 0.2946  | Metoxadiazone                                                                                                                                                     | 3.3027746  | - | - | - | 34.3269  | 223.20541  |
| POS09392 | 131109.72   | 81631.95787 | -0.68357 | 0.04745  | 0.3143 | 0.17304 | Ibandronate                                                                                                                                                       | -19.210211 | - | - | - | 34.3269  | 320.230044 |
| POS09394 | 235210.9249 | 223803.7106 | -0.07172 | 0.898415 | 0.953  | 0.02547 | Ascorbate 2-sulfate                                                                                                                                               | -18.744675 | - | - | - | 34.32115 | 257.189774 |

|          |             |             |          |          |        |         |                                                        |            |   |   |   |          |            |
|----------|-------------|-------------|----------|----------|--------|---------|--------------------------------------------------------|------------|---|---|---|----------|------------|
| POS09397 | 73198.99622 | 24290.21171 | -1.59145 | 0.172215 | 0.4986 | 0.14259 | Molybdoenzyme molybdenum cofactor                      | 13.68175   | - | - | - | 34.30825 | 522.289109 |
| POS09399 | 210495.095  | 162287.5034 | -0.37523 | 0.370618 | 0.6495 | 0.13145 | 2-O-(alpha-D-Mannosyl)-D-glycerate                     | 2.967231   | - | - | - | 34.2932  | 269.225972 |
| POS09400 | 179665.1066 | 136820.6288 | -0.39302 | 0.157723 | 0.4863 | 0.13264 | 2,4,5-trihydroxy-0-(2,4,0-trihydroxybenzoyloxy)oxalate | 16.451763  | - | - | - | 34.2932  | 347.256973 |
| POS09401 | 151402.4383 | 68634.77605 | -1.14138 | 0.126821 | 0.4452 | 0.19452 | Salicin 6-phosphate                                    | -7.0182581 | - | - | - | 34.2932  | 367.262406 |
| POS09403 | 50840.00619 | 54522.62277 | 0.100891 | 0.773067 | 0.8949 | 0.02417 | HR1917                                                 | 1.4406714  | - | - | - | 34.26135 | 571.435298 |
| POS09411 | 375048.6303 | 363643.0977 | -0.04455 | 0.781317 | 0.8994 | 0.02218 | Oseltamivir phosphate                                  | -24.481593 | - | - | - | 34.2516  | 411.396929 |
| POS09414 | 89077.94467 | 35045.90818 | -1.34582 | 0.285675 | 0.6011 | 0.1342  | SB 228357                                              | -11.191555 | - | - | - | 34.2437  | 432.385349 |
| POS09415 | 192453.8818 | 145846.6432 | -0.40006 | 0.298947 | 0.6119 | 0.12729 | 2-O-Caffeoyltartronic acid                             | -17.940916 | - | - | - | 34.2366  | 283.205214 |
| POS09416 | 129476.2877 | 195729.6053 | 0.596174 | 0.293217 | 0.608  | 0.16131 | Tectorigenin 4'-sulfate                                | 5.726912   | - | - | - | 34.2331  | 381.335455 |
| POS09418 | 265806.1894 | 239914.804  | -0.14785 | 0.365826 | 0.6455 | 0.07823 | Flecainide                                             | 14.350845  | - | - | - | 34.21035 | 415.355923 |
| POS09419 | 454650.449  | 354450.707  | -0.35917 | 0.09038  | 0.3896 | 0.24377 | 3'-Methoxyfukiic acid                                  | -20.078245 | - | - | - | 34.21035 | 287.23633  |
| POS09420 | 160329.1633 | 196969.8641 | 0.296938 | 0.739534 | 0.8769 | 0.09602 | Felodipine                                             | 23.922739  | - | - | - | 34.2068  | 385.270469 |
| POS09424 | 194057.3475 | 159001.1307 | -0.28745 | 0.075301 | 0.3677 | 0.1368  | Diethyl phenyl phosphate                               | 24.687079  | - | - | - | 34.177   | 231.21046  |
| POS09425 | 269375.4327 | 207839.4221 | -0.37415 | 0.562526 | 0.776  | 0.10098 | beta-1-nor-alpha-phenylbenzeneethamine hydrochloride   | 3.6784699  | - | - | - | 34.177   | 269.189863 |
| POS09428 | 341633.718  | 285034.0402 | -0.26132 | 0.030278 | 0.2685 | 0.20615 | Dimethylenetriurea                                     | 2.4528523  | - | - | - | 34.1756  | 205.194977 |
| POS09430 | 125325.7918 | 70889.88979 | -0.82203 | 0.438115 | 0.6952 | 0.13238 | Alginic acid                                           | -20.568239 | - | - | - | 34.1756  | 419.226174 |
| POS09433 | 113808.6292 | 106270.1712 | -0.09887 | 0.646549 | 0.8266 | 0.03664 | 6-(1,3,14-dioxo-8,17-dioxatetraacycloheptane)          | 14.607414  | - | - | - | 34.1625  | 461.361001 |
| POS09437 | 1251.418232 | 417859.5914 | 8.38331  | 0.34102  | 0.6326 | 0.28222 | Carbovir Triphosphate                                  | -20.786018 | - | - | - | 34.148   | 488.19005  |
| POS09439 | 134152.3323 | 74240.85112 | -0.85359 | 0.039025 | 0.2955 | 0.19698 | 2-phosphono-5-carboxy-5-aminimidazole                  | -11.729236 | - | - | - | 34.146   | 337.177334 |
| POS09440 | 151321.0337 | 132595.0155 | -0.19059 | 0.321236 | 0.6288 | 0.0606  | 5-Hydroxydantrolene                                    | 8.8947908  | - | - | - | 34.146   | 331.262614 |
| POS09444 | 231586.6046 | 214342.8755 | -0.11163 | 0.634306 | 0.8188 | 0.03851 | 6-O-Methylarmillaridin                                 | -8.674349  | - | - | - | 34.14265 | 463.966261 |
| POS09449 | 137302.4761 | 115715.7659 | -0.24677 | 0.338397 | 0.6326 | 0.08004 | Diclobutrazol                                          | 8.2430605  | - | - | - | 34.1393  | 329.246882 |
| POS09450 | 172124.8723 | 100105.0944 | -0.78194 | 0.026225 | 0.2576 | 0.21792 | 2-Galloyl-1,4-galactarolactone methyl ester            | -13.458696 | - | - | - | 34.1393  | 359.256855 |

|          |             |             |          |          |        |         |                                                                                              |            |   |   |   |          |            |
|----------|-------------|-------------|----------|----------|--------|---------|----------------------------------------------------------------------------------------------|------------|---|---|---|----------|------------|
| POS09452 | 154056.9377 | 75604.62773 | -1.02692 | 0.053048 | 0.3235 | 0.21599 | Glutathioselenol                                                                             | -7.2625389 | - | - | - | 34.1393  | 387.287971 |
| POS09457 | 50787.09387 | 30509.44642 | -0.73521 | 0.400284 | 0.6679 | 0.07494 | 3'-Phosphoadenylyl sulfate                                                                   | 4.6721017  | - | - | - | 34.13355 | 508.273947 |
| POS09458 | 233662.4218 | 226794.7186 | -0.04304 | 0.75178  | 0.8841 | 0.01748 | N(omega)-Nitro-L-arginine                                                                    | -0.0458391 | - | - | - | 34.13255 | 220.205767 |
| POS09459 | 485210.9716 | 362515.2123 | -0.42057 | 0.009615 | 0.1933 | 0.31136 | Maclurin                                                                                     | -3.3544481 | - | - | - | 34.13145 | 263.221297 |
| POS09464 | 2345923.556 | 727724.7554 | -1.68869 | 0.198586 | 0.5243 | 0.94848 | 2-Hydroxy-6-oxo-6-phenylhexa-2,4-dienoate                                                    | -9.5781545 | - | - | - | 34.12255 | 219.210587 |
| POS09465 | 420228.5648 | 343195.4787 | -0.29214 | 0.099147 | 0.4054 | 0.19209 | 5,5-Dihydroxyphenyl 1-O-(6-O-galloyl-beta-D-glucuronoside)                                   | 21.341506  | - | - | - | 34.12135 | 441.371574 |
| POS09466 | 158399.6328 | 198656.3936 | 0.326706 | 0.391557 | 0.6612 | 0.11543 | Anagrelide                                                                                   | -15.206571 | - | - | - | 34.1192  | 257.091382 |
| POS09468 | 59583.98005 | 163352.322  | 1.454991 | 0.010518 | 0.1967 | 0.27464 | Clomeprop                                                                                    | 14.393874  | - | - | - | 34.1192  | 325.213743 |
| POS09477 | 92254.02878 | 145470.9203 | 0.657047 | 0.148748 | 0.4744 | 0.14527 | Demethylbellidifolin                                                                         | -2.7819964 | - | - | - | 34.1078  | 261.205553 |
| POS09478 | 193639.5474 | 132101.2997 | -0.55173 | 0.251671 | 0.5699 | 0.15052 | 5,4,5-trihydroxy-6-(1,5-oxo-3-[(3,4,5,6-5,4-dihydro-3-hydroxy-4-S-glutathionyl bromobenzene) | -0.5165918 | - | - | - | 34.1078  | 443.333048 |
| POS09480 | 62479.25634 | 34072.06567 | -0.87479 | 0.129067 | 0.4476 | 0.11443 | S-glutathionyl bromobenzene                                                                  | -17.954263 | - | - | - | 34.1062  | 481.329453 |
| POS09491 | 2085881.644 | 1843122.029 | -0.17851 | 0.272707 | 0.5901 | 0.30121 | Quercetin 3-O-(6-O-malonyl-beta-D-glucoside)                                                 | -12.413793 | - | - | - | 34.05775 | 551.422944 |
| POS09492 | 63020.41283 | 56973.21602 | -0.14554 | 0.516481 | 0.7481 | 0.02903 | 1-O,6-O-Digalloyl-beta-D-glucose                                                             | -22.41779  | - | - | - | 34.0458  | 485.360818 |
| POS09493 | 1071680.753 | 118123.2307 | -3.18151 | 0.31676  | 0.6253 | 0.53841 | N-Acetyldemethylphosphinot                                                                   | -3.1960472 | - | - | - | 34.0458  | 352.298854 |
| POS09506 | 240844.3375 | 71093.5778  | -1.76031 | 0.068894 | 0.3541 | 0.30978 | Shoyuflavone B                                                                               | 8.7586692  | - | - | - | 34.0283  | 403.3193   |
| POS09508 | 324566.5975 | 494623.6856 | 0.607817 | 0.263185 | 0.58   | 0.26078 | Gallamine Triethiodide                                                                       | -5.4390675 | - | - | - | 34.0253  | 892.531528 |
| POS09509 | 168872.1235 | 105185.339  | -0.683   | 0.260558 | 0.5788 | 0.14787 | 5,4,5-trihydroxy-6-(6-hydroxy-7-methoxy-2H-1,2-benzodioxole 5                                | -10.270977 | - | - | - | 34.02325 | 389.284289 |
| POS09512 | 315565.5776 | 180468.2498 | -0.80619 | 0.288099 | 0.603  | 0.21263 | Talc                                                                                         | 14.3128    | - | - | - | 34.0077  | 380.278405 |
| POS09517 | 150991.8119 | 122316.1183 | -0.30386 | 0.360707 | 0.6433 | 0.08547 | Fosphenytoin                                                                                 | 19.389175  | - | - | - | 33.9986  | 363.288201 |
| POS09518 | 207370.7982 | 107141.7202 | -0.95269 | 0.11168  | 0.4241 | 0.25186 | Brevifolincarboxylic acid 9-sulfate                                                          | 11.42804   | - | - | - | 33.9986  | 373.272531 |
| POS09519 | 213554.7704 | 199575.7701 | -0.09767 | 0.658094 | 0.8318 | 0.02368 | Methylgallic acid-O-sulphate                                                                 | -2.3702598 | - | - | - | 33.9954  | 265.21565  |
| POS09521 | 346468.272  | 261587.4781 | -0.40543 | 0.220062 | 0.5412 | 0.19522 | Tetracenomyacin D3                                                                           | 7.3890338  | - | - | - | 33.9831  | 381.314587 |
| POS09527 | 173508.7165 | 123066.5329 | -0.49557 | 0.020429 | 0.2388 | 0.18135 | Epigallocatechin 3-gallate                                                                   | 7.6924348  | - | - | - | 33.9598  | 459.382503 |



|          |             |             |          |          |        |         |                                                                                    |            |   |   |   |          |            |
|----------|-------------|-------------|----------|----------|--------|---------|------------------------------------------------------------------------------------|------------|---|---|---|----------|------------|
| POS09529 | 113703.5222 | 98961.17805 | -0.20034 | 0.412144 | 0.6765 | 0.07425 | Arbutin                                                                            | -4.1515542 | - | - | - | 33.9591  | 273.257346 |
| POS09531 | 118813.0599 | 93743.9705  | -0.3419  | 0.133177 | 0.4535 | 0.10155 | Theogallin                                                                         | 0.3025178  | - | - | - | 33.95255 | 345.278181 |
| POS09533 | 249907.027  | 231506.9549 | -0.11034 | 0.577667 | 0.7844 | 0.04677 | Cryptocyanin                                                                       | 20.466008  | - | - | - | 33.952   | 481.401008 |
| POS09535 | 179231.6649 | 76500.89832 | -1.22828 | 0.017597 | 0.2275 | 0.26472 | FMN                                                                                | -5.7985261 | - | - | - | 33.9263  | 457.34843  |
| POS09536 | 39642.01775 | 9883.618526 | -2.00392 | 0.295975 | 0.6096 | 0.11191 | 5-(5-phospho-D-ribose-3-phosphosphospho-1,4-dihydroxy-2-naphthyl)-3-oxobrimonidine | 23.174639  | - | - | - | 33.9263  | 578.351656 |
| POS09541 | 278641.1175 | 260200.8157 | -0.09878 | 0.907614 | 0.9575 | 0.01631 | 3-oxobrimonidine                                                                   | 19.508476  | - | - | - | 33.9086  | 311.163327 |
| POS09546 | 209842.0205 | 68667.71461 | -1.6116  | 0.237345 | 0.5572 | 0.23525 | Clomide                                                                            | -5.4172916 | - | - | - | 33.88535 | 433.272835 |
| POS09547 | 85477.55048 | 74183.37675 | -0.20445 | 0.577024 | 0.7841 | 0.04773 | Tizoxanide glucuronide                                                             | -2.2672882 | - | - | - | 33.88345 | 442.375276 |
| POS09549 | 213914.9224 | 85623.33797 | -1.32096 | 0.081695 | 0.378  | 0.27132 | 6-methyluracil-2,4-diphosphate ribonucleoside                                      | -14.39501  | - | - | - | 33.86035 | 379.300031 |
| POS09550 | 140828.0954 | 52080.1218  | -1.43513 | 0.00097  | 0.0736 | 0.27493 | Homatropine Methylbromide                                                          | 17.554807  | - | - | - | 33.8589  | 371.294777 |
| POS09551 | 2898922.674 | 1691665.094 | -0.77707 | 0.332846 | 0.6326 | 0.66441 | 5-Sulfosalicylate                                                                  | 17.076912  | - | - | - | 33.8433  | 219.194903 |
| POS09553 | 124912.8501 | 104319.6032 | -0.25991 | 0.15542  | 0.4838 | 0.10609 | Myricetin 3-arabinoside                                                            | -2.9083276 | - | - | - | 33.8433  | 451.355667 |
| POS09554 | 906636.1625 | 330488.5266 | -1.45592 | 0.336101 | 0.6326 | 0.40829 | Violanthin                                                                         | -21.285648 | - | - | - | 33.8433  | 579.513662 |
| POS09559 | 223798.298  | 209661.2125 | -0.09414 | 0.853299 | 0.9334 | 0.01394 | Imazalil nitrate                                                                   | -0.5680057 | - | - | - | 33.8324  | 361.199672 |
| POS09561 | 284955.7171 | 198761.0455 | -0.5197  | 0.234325 | 0.5554 | 0.19036 | Dimethyl 2-galloylgalactarate                                                      | -11.155029 | - | - | - | 33.83185 | 391.299123 |
| POS09563 | 509915.8258 | 452162.0727 | -0.17342 | 0.374777 | 0.6504 | 0.12024 | 8-Hydroxypinoresinol 4-glucoside                                                   | 4.1033308  | - | - | - | 33.8289  | 537.534578 |
| POS09566 | 295444.259  | 81825.70011 | -1.85226 | 0.14753  | 0.4732 | 0.32576 | Baicalin                                                                           | -9.7529117 | - | - | - | 33.821   | 447.363923 |
| POS09567 | 122433.6939 | 102698.9165 | -0.25358 | 0.210597 | 0.5339 | 0.07308 | Flucarbazone-sodium                                                                | 12.271057  | - | - | - | 33.81805 | 419.293409 |
| POS09568 | 158483.8507 | 107073.2471 | -0.56574 | 0.036969 | 0.2884 | 0.17777 | Xanthoxol glucoside                                                                | -18.475085 | - | - | - | 33.8058  | 365.304046 |
| POS09569 | 426047.9809 | 346786.8416 | -0.29697 | 0.105292 | 0.4125 | 0.19488 | (4S,5S)-4,5-dihydroxy-3-methoxyphenylpropan-2-one                                  | -1.4156373 | - | - | - | 33.8058  | 445.366648 |
| POS09570 | 193368.5289 | 67612.66204 | -1.51599 | 0.050646 | 0.3192 | 0.27884 | Tenitramine                                                                        | 24.380453  | - | - | - | 33.8057  | 417.316226 |
| POS09571 | 158612.4067 | 117357.4949 | -0.4346  | 0.152712 | 0.4804 | 0.1479  | 5,4,3-trihydroxy-6-(1L-2,3,4-trihydroxyphenyl)butanoic acid                        | -16.036915 | - | - | - | 33.8044  | 361.272499 |
| POS09573 | 368163.8405 | 358779.21   | -0.03725 | 0.927177 | 0.9669 | 0.03063 | 16alpha-Bromo-17beta-estradiol                                                     | -4.6217089 | - | - | - | 33.80335 | 352.283653 |

|          |             |             |          |          |        |         |                                                                                                                          |            |   |   |   |          |            |
|----------|-------------|-------------|----------|----------|--------|---------|--------------------------------------------------------------------------------------------------------------------------|------------|---|---|---|----------|------------|
| POS09578 | 107336.7263 | 98316.95893 | -0.12663 | 0.599559 | 0.7973 | 0.04127 | N-Sulfo-D-glucosamine                                                                                                    | -17.529549 | - | - | - | 33.79205 | 260.237032 |
| POS09582 | 188121.6991 | 197793.7883 | 0.072331 | 0.621983 | 0.8124 | 0.04521 | Threoninyl-Glutamate                                                                                                     | 18.540466  | - | - | - | 33.7911  | 248.23706  |
| POS09584 | 121556.7223 | 56650.53911 | -1.10147 | 0.053056 | 0.3235 | 0.18932 | Cellobiono-1,5-lactone                                                                                                   | -12.34708  | - | - | - | 33.7904  | 341.283675 |
| POS09587 | 167949.0625 | 143230.3688 | -0.22969 | 0.261379 | 0.5789 | 0.10426 | 5-Carboxy-2'-deoxyuridine                                                                                                | 7.9651469  | - | - | - | 33.7857  | 273.220945 |
| POS09588 | 218028.348  | 88523.84024 | -1.30038 | 0.002734 | 0.1138 | 0.33986 | 1,2,3,4-1-etranyaro-<br>alpha,7-dihydroxy-beta-<br>(hydroxymethyl) 9                                                     | -6.1999469 | - | - | - | 33.7857  | 349.309217 |
| POS09591 | 519343.4867 | 765551.3716 | 0.55981  | 0.23786  | 0.5574 | 0.31369 | Chlorophyll a                                                                                                            | 22.518113  | - | - | - | 33.7835  | 895.543419 |
| POS09598 | 222266.5142 | 170046.0251 | -0.38637 | 0.015826 | 0.2226 | 0.1834  | (-)-Epicatechin 3-O-<br>gallate                                                                                          | 8.8132851  | - | - | - | 33.77775 | 443.387175 |
| POS09599 | 128272.6787 | 113512.6885 | -0.17636 | 0.340865 | 0.6326 | 0.06315 | Cellulose triacetate                                                                                                     | 13.607121  | - | - | - | 33.77515 | 538.537591 |
| POS09600 | 324510.1916 | 401416.9815 | 0.306838 | 0.187219 | 0.513  | 0.21238 | Phaseolic acid                                                                                                           | 16.88046   | - | - | - | 33.7742  | 297.241877 |
| POS09601 | 211781.3    | 139884.6619 | -0.59834 | 0.419543 | 0.681  | 0.15184 | 3-O-Ethyl-L-ascorbic acid                                                                                                | -24.103547 | - | - | - | 33.7742  | 205.179655 |
| POS09602 | 627328.0432 | 490870.5443 | -0.35388 | 0.068698 | 0.3541 | 0.28475 | Prostalidin A                                                                                                            | -20.094921 | - | - | - | 33.7742  | 395.330453 |
| POS09603 | 96585.39849 | 97902.59779 | 0.019542 | 0.935102 | 0.971  | 0.01055 | 2,3,3',4,4',5,5'-<br>Heptachlorobiphenyl                                                                                 | 7.8075932  | - | - | - | 33.7742  | 396.333563 |
| POS09609 | 4401417.901 | 3243393.76  | -0.44046 | 0.091925 | 0.3933 | 0.76195 | Cobalt sulfate                                                                                                           | 19.108601  | - | - | - | 33.74195 | 282.115448 |
| POS09610 | 217734.661  | 202802.6539 | -0.10249 | 0.551348 | 0.7699 | 0.04588 | trans-Zeatin riboside<br>diphosphate                                                                                     | -17.571029 | - | - | - | 33.74195 | 512.315792 |
| POS09611 | 109696.0359 | 62774.11213 | -0.80527 | 0.000686 | 0.0721 | 0.20793 | Miraxanthin-II                                                                                                           | 9.5197289  | - | - | - | 33.74195 | 327.269282 |
| POS09614 | 124738.3249 | 90558.14653 | -0.46199 | 0.193741 | 0.5196 | 0.12407 | 5,4,5-trinyuroxy-0-(12-<br>oxo-3-(2,3,4,5-<br>tetrahydroxyphenyl)propano-<br>6-Thioxanthine 5'-<br>monophosphate         | -23.280221 | - | - | - | 33.7358  | 405.277865 |
| POS09621 | 234368.3662 | 185453.2189 | -0.33772 | 0.566412 | 0.7778 | 0.07244 | 6-Thioxanthine 5'-<br>monophosphate                                                                                      | 0.1195289  | - | - | - | 33.7026  | 381.278322 |
| POS09622 | 130523.5125 | 58462.38586 | -1.15873 | 0.083484 | 0.3801 | 0.20184 | Carmine                                                                                                                  | -13.689546 | - | - | - | 33.7026  | 493.386936 |
| POS09628 | 326042.1749 | 266174.4482 | -0.29269 | 0.085379 | 0.3847 | 0.17233 | 6-Deoxy-6-sulfo-D-<br>fructose 1-phosphate                                                                               | -16.725932 | - | - | - | 33.6881  | 325.201454 |
| POS09638 | 72068.23013 | 37068.41909 | -0.95917 | 0.082629 | 0.3793 | 0.13486 | Kalbreclasine                                                                                                            | -11.828424 | - | - | - | 33.64965 | 470.397824 |
| POS09639 | 395613.8337 | 247078.8885 | -0.67912 | 0.336952 | 0.6326 | 0.19999 | 4,4',6,6'-Tetranitro-2,2'-<br>azoxytoluene                                                                               | 18.572018  | - | - | - | 33.646   | 407.278822 |
| POS09640 | 332838.8076 | 136167.1188 | -1.28945 | 0.483312 | 0.7262 | 0.23504 | (2-(12,7-dihydroxy-2-(3-<br>hydroxyphenyl)-4-oxo-4H-<br>1,2,4-triazolo[3,4-b]pyridin-5-yl)-5,6-<br>dimethylbenzimidazole | -7.3037279 | - | - | - | 33.63845 | 499.413636 |
| POS09641 | 76196.88655 | 57990.95068 | -0.3939  | 0.30476  | 0.6169 | 0.06739 | (2-(12,7-dihydroxy-2-(3-<br>hydroxyphenyl)-4-oxo-4H-<br>1,2,4-triazolo[3,4-b]pyridin-5-yl)-5,6-<br>dimethylbenzimidazole | 7.7515692  | - | - | - | 33.6287  | 359.293654 |

|          |             |             |          |          |        |         |                                                             |            |   |   |   |          |            |
|----------|-------------|-------------|----------|----------|--------|---------|-------------------------------------------------------------|------------|---|---|---|----------|------------|
| POS09645 | 328497.2454 | 371959.9942 | 0.179266 | 0.452724 | 0.7066 | 0.13147 | DHAP(6:0)                                                   | 9.2405746  | - | - | - | 33.6145  | 269.210555 |
| POS09646 | 247098.4275 | 175883.3657 | -0.49047 | 0.060201 | 0.3376 | 0.19999 | 3-Hydroxy-L-glutamate                                       | -9.505806  | - | - | - | 33.6142  | 164.134426 |
| POS09649 | 456955.5106 | 410209.8683 | -0.15569 | 0.403797 | 0.6703 | 0.10439 | Diflunisal                                                  | -20.05326  | - | - | - | 33.5967  | 251.199859 |
| POS09651 | 6439040.447 | 4641758.66  | -0.47217 | 0.055391 | 0.3276 | 1.02479 | Erythro-4-hydroxy-L-glutamate(1-)                           | 10.554978  | - | - | - | 33.588   | 163.130988 |
| POS09652 | 366637.2194 | 545394.3415 | 0.572946 | 0.036405 | 0.2865 | 0.31972 | 6-Methylthioguanosine monophosphate                         | -5.7685561 | - | - | - | 33.588   | 394.317808 |
| POS09654 | 87903.67113 | 62555.51085 | -0.49079 | 0.100436 | 0.407  | 0.11865 | Buchanin                                                    | -17.243975 | - | - | - | 33.58325 | 286.252358 |
| POS09655 | 216124.8017 | 171168.594  | -0.33645 | 0.20815  | 0.5321 | 0.13362 | Trifloxystrobin                                             | 8.5986944  | - | - | - | 33.5793  | 409.381888 |
| POS09656 | 104302.7484 | 88136.4278  | -0.24297 | 0.3606   | 0.6432 | 0.07269 | Tetracenomycin C                                            | -15.797129 | - | - | - | 33.5793  | 473.398114 |
| POS09657 | 108836.2974 | 73202.29623 | -0.5722  | 0.052922 | 0.3235 | 0.14461 | 5,4,5,11,14,20,21,22-octahydroxy-13-(hydroxymethyl) D 12 16 | -21.298305 | - | - | - | 33.5793  | 483.345503 |
| POS09659 | 276566.2857 | 265503.0494 | -0.0589  | 0.82252  | 0.9184 | 0.03165 | Bikaverin                                                   | 6.2519743  | - | - | - | 33.579   | 383.330067 |
| POS09661 | 714424.469  | 491434.7121 | -0.53978 | 0.211348 | 0.5346 | 0.27896 | Sodium ortho-phenylphete                                    | -6.4635437 | - | - | - | 33.5787  | 193.195034 |
| POS09665 | 177639.1156 | 108638.8765 | -0.70941 | 0.02969  | 0.2674 | 0.21839 | Pachyrrhizone                                               | -23.573346 | - | - | - | 33.55245 | 367.319641 |
| POS09666 | 439963.381  | 312702.896  | -0.49259 | 0.000971 | 0.0736 | 0.33954 | Dihydro-ME                                                  | -21.836553 | - | - | - | 33.54345 | 399.361378 |
| POS09667 | 143381.8611 | 96294.47853 | -0.57434 | 0.015769 | 0.2226 | 0.17644 | Fluacrypyrim                                                | -1.8168194 | - | - | - | 33.54345 | 427.392902 |
| POS09668 | 171245.1301 | 171835.8237 | 0.004968 | 0.9841   | 0.9921 | 0.00037 | Eucommin A                                                  | -16.218642 | - | - | - | 33.5425  | 551.550047 |
| POS09672 | 656505.9679 | 518286.1719 | -0.34106 | 0.036941 | 0.2884 | 0.29918 | {2,0-dimethoxy-4-1,5-oxo-3-(2,4,6-                          | -0.9179462 | - | - | - | 33.50725 | 413.376898 |
| POS09676 | 190034.0784 | 55542.94048 | -1.77458 | 0.11981  | 0.4353 | 0.26238 | 6-[3-(6,7-dimethoxy-2H-1,3-benzodioxol-5-yl)oxirane-2-      | -9.0612473 | - | - | - | 33.50095 | 445.34825  |
| POS09678 | 487993.5541 | 359585.8731 | -0.44053 | 0.067277 | 0.352  | 0.27151 | 2-Sulfotrehalose                                            | -13.555167 | - | - | - | 33.4916  | 423.361251 |
| POS09679 | 126097.7072 | 122392.4008 | -0.04303 | 0.843771 | 0.9289 | 0.00384 | Acadesine                                                   | 11.964312  | - | - | - | 33.48795 | 259.241666 |
| POS09680 | 248638.0316 | 167001.5323 | -0.57419 | 0.185674 | 0.5117 | 0.18151 | Oxaziclomefone                                              | -0.7854549 | - | - | - | 33.48795 | 377.283381 |
| POS09682 | 147477.3858 | 68012.66186 | -1.11662 | 0.015255 | 0.2226 | 0.23758 | Tomentin                                                    | -5.4830856 | - | - | - | 33.4864  | 347.293678 |
| POS09683 | 100572.4608 | 109278.7091 | 0.119777 | 0.822423 | 0.9184 | 0.04631 | Kimycin D                                                   | -13.831136 | - | - | - | 33.4812  | 455.387292 |
| POS09686 | 87644.42658 | 75075.25964 | -0.22332 | 0.419485 | 0.681  | 0.05376 | Pantoyllactone glucoside                                    | -22.031611 | - | - | - | 33.4696  | 293.283237 |

|          |             |             |          |          |        |         |                                                                |            |   |   |   |          |            |
|----------|-------------|-------------|----------|----------|--------|---------|----------------------------------------------------------------|------------|---|---|---|----------|------------|
| POS09691 | 1080417     | 978757.0434 | -0.14257 | 0.186935 | 0.5126 | 0.22276 | {11-methoxy-10,18-dioxo-6,8,19-trioxanantocyclin[10.7.0.0n     | 19.812732  | - | - | - | 33.46385 | 409.345367 |
| POS09692 | 69665.91246 | 55358.95328 | -0.33164 | 0.257707 | 0.576  | 0.06378 | Halofantrine                                                   | -2.8190353 | - | - | - | 33.46275 | 501.429566 |
| POS09694 | 357121.7435 | 297782.008  | -0.26216 | 0.080293 | 0.3749 | 0.17794 | Chamaemeloside                                                 | -23.13039  | - | - | - | 33.4614  | 577.496742 |
| POS09695 | 102783.9672 | 71886.45167 | -0.51582 | 0.045864 | 0.3134 | 0.13709 | 3,4,5-trimethoxy-2-[hydroxy(3,4,5-trihydroxyoxyan-2            | -24.981622 | - | - | - | 33.4588  | 467.387625 |
| POS09696 | 111703.9284 | 128923.3681 | 0.206834 | 0.332856 | 0.6326 | 0.08165 | Niflumic acid                                                  | 2.8099604  | - | - | - | 33.4581  | 283.22607  |
| POS09698 | 110626.4652 | 47212.0136  | -1.22847 | 0.219425 | 0.5402 | 0.15874 | Spectinomycin dihydrochloride                                  | 2.4994729  | - | - | - | 33.4581  | 406.27969  |
| POS09699 | 637774.8155 | 537308.7623 | -0.2473  | 0.097242 | 0.4032 | 0.22401 | Methyl nogalote                                                | -21.271662 | - | - | - | 33.4555  | 397.345746 |
| POS09700 | 69923.52442 | 90138.95308 | 0.366373 | 0.318122 | 0.6265 | 0.0909  | (5-L-Glutamyl)-L-glutamine                                     | 8.757113   | - | - | - | 33.4529  | 276.268187 |
| POS09701 | 53554.0391  | 52482.06556 | -0.02917 | 0.93911  | 0.9725 | 0.00666 | Tolcapone                                                      | 16.625186  | - | - | - | 33.4526  | 274.252619 |
| POS09702 | 183503.4722 | 137315.3702 | -0.41831 | 0.070288 | 0.357  | 0.15795 | Cromolyn                                                       | -16.100228 | - | - | - | 33.4526  | 469.366236 |
| POS09703 | 191937.796  | 127904.5914 | -0.58557 | 0.122435 | 0.4401 | 0.18511 | Apigenin                                                       | -9.4317337 | - | - | - | 33.45165 | 271.241628 |
| POS09704 | 362190.5923 | 344975.017  | -0.07026 | 0.613219 | 0.8075 | 0.05945 | Gonyautoxin 1                                                  | 21.741547  | - | - | - | 33.45055 | 412.36472  |
| POS09705 | 155914.7779 | 169112.7744 | 0.117228 | 0.681564 | 0.8432 | 0.03422 | Macrozamin                                                     | 4.9777029  | - | - | - | 33.4504  | 385.34569  |
| POS09707 | 232035.2601 | 66471.69504 | -1.80353 | 0.097531 | 0.4036 | 0.30017 | Quercitrin                                                     | -10.763428 | - | - | - | 33.4482  | 449.379351 |
| POS09708 | 134948.8829 | 228390.9882 | 0.759093 | 0.549344 | 0.769  | 0.15491 | Piceatannol 4'-galloylglucoside                                | -13.835606 | - | - | - | 33.4467  | 559.48705  |
| POS09709 | 1367806.524 | 1091978.426 | -0.32492 | 0.107916 | 0.4178 | 0.36635 | CMP                                                            | -16.660856 | - | - | - | 33.44635 | 324.198392 |
| POS09710 | 657039.7144 | 543043.7506 | -0.27491 | 0.04821  | 0.3148 | 0.2553  | 1,4-Bis(chloromethoxymethyl)benzene                            | -17.975422 | - | - | - | 33.44635 | 236.11015  |
| POS09713 | 615102.0832 | 892545.2266 | 0.537099 | 0.385729 | 0.6583 | 0.29924 | Methyl aklanote                                                | 4.2694037  | - | - | - | 33.4452  | 411.382529 |
| POS09715 | 301328.3618 | 255020.0566 | -0.24073 | 0.888741 | 0.9492 | 0.119   | Amritoside                                                     | 23.937861  | - | - | - | 33.4452  | 627.496073 |
| POS09717 | 155709.4593 | 160129.93   | 0.040386 | 0.85251  | 0.933  | 0.01255 | Flazasulfuron                                                  | 3.3607857  | - | - | - | 33.44295 | 408.333746 |
| POS09719 | 87705.00077 | 84933.19966 | -0.04633 | 0.933966 | 0.9703 | 0.00064 | Pancreatistatin                                                | 17.097876  | - | - | - | 33.4414  | 326.283638 |
| POS09721 | 225962.2671 | 193196.4347 | -0.22601 | 0.078143 | 0.3724 | 0.12113 | CI Orange G                                                    | -11.35337  | - | - | - | 33.43855 | 453.371441 |
| POS09722 | 39942.28587 | 49538.29666 | 0.310627 | 0.307897 | 0.619  | 0.06033 | {2-[(5-methyloxy-2-enoyl)oxy]-2-[9-[(3-methylbut-2-enyl)oxy]-2 | -15.239695 | - | - | - | 33.4357  | 523.519314 |

|          |             |             |          |          |        |         |                                                                                                     |            |   |   |   |          |            |
|----------|-------------|-------------|----------|----------|--------|---------|-----------------------------------------------------------------------------------------------------|------------|---|---|---|----------|------------|
| POS09724 | 213556.1938 | 234244.3776 | 0.133399 | 0.533838 | 0.7588 | 0.06888 | Cefuroxime sodium                                                                                   | 16.633643  | - | - | - | 33.4066  | 447.381801 |
| POS09725 | 201998.6602 | 181604.6765 | -0.15354 | 0.47486  | 0.7207 | 0.0607  | O-Acetyl-ADP-ribose                                                                                 | 15.678103  | - | - | - | 33.4066  | 602.369105 |
| POS09727 | 47619.87601 | 51934.18438 | 0.125121 | 0.615592 | 0.8087 | 0.01587 | Flunitrazepam                                                                                       | -22.078746 | - | - | - | 33.4021  | 314.28356  |
| POS09728 | 123692.3808 | 107846.5437 | -0.19778 | 0.477294 | 0.7223 | 0.06092 | N-Adenylylanthranilate                                                                              | 3.6329986  | - | - | - | 33.401   | 467.350871 |
| POS09731 | 111858.2125 | 45327.9153  | -1.3032  | 0.007172 | 0.1779 | 0.23162 | 6-(3,5-dimethoxy-2-(3,4,5-trimethoxyphenyl)propanoic trihydroxy-6-<br>(hydroxymethyl)oxan-2         | -24.520289 | - | - | - | 33.3687  | 465.37189  |
| POS09734 | 193649.672  | 149262.7873 | -0.37559 | 0.643674 | 0.825  | 0.07275 | Lactitol dihydrate                                                                                  | 1.0796037  | - | - | - | 33.3561  | 381.350587 |
| POS09737 | 92989.10485 | 100581.2649 | 0.113228 | 0.67912  | 0.8418 | 0.01939 | CGS 7181                                                                                            | 8.49987    | - | - | - | 33.338   | 407.365931 |
| POS09738 | 101778.7146 | 69362.69769 | -0.5532  | 0.060268 | 0.3376 | 0.13289 | 6-(3,5-dimethoxy-2-(3,4,5-trimethoxyphenyl)propanoic<br>Kaempferol 3-O-beta-D-xylo-                 | 7.828673   | - | - | - | 33.3238  | 525.486383 |
| POS09739 | 200054.1478 | 155916.1184 | -0.35962 | 0.121968 | 0.4395 | 0.14699 | xyloside                                                                                            | -18.178067 | - | - | - | 33.3148  | 419.350572 |
| POS09744 | 99303.33118 | 100904.2956 | 0.023074 | 0.902119 | 0.9547 | 0.01434 | 4-Keto-anhydrotetracycline<br>alpha-L-                                                              | 18.026395  | - | - | - | 33.2849  | 398.349439 |
| POS09745 | 160199.8887 | 67464.2743  | -1.24768 | 0.073851 | 0.3652 | 0.23471 | Rhamnopyranosyl-(1-&gt;2)-beta-D-                                                                   | -3.8755348 | - | - | - | 33.2849  | 503.426529 |
| POS09747 | 206741.6946 | 232806.0619 | 0.171299 | 0.835608 | 0.9247 | 0.0362  | Lancerin                                                                                            | 7.9426707  | - | - | - | 33.2572  | 407.350704 |
| POS09748 | 58228.73649 | 45928.49332 | -0.34234 | 0.344923 | 0.6341 | 0.06767 | 7-Methylxanthosine                                                                                  | 2.9588125  | - | - | - | 33.244   | 300.268162 |
| POS09751 | 4004511.338 | 3551201.459 | -0.17332 | 0.469282 | 0.7174 | 0.39577 | Isoimide                                                                                            | 14.273953  | - | - | - | 33.24215 | 307.166247 |
| POS09752 | 129741.2551 | 80485.75333 | -0.68883 | 0.075273 | 0.3677 | 0.17925 | Aluminoparaaminosalicylate calcium                                                                  | 16.203314  | - | - | - | 33.24145 | 405.335028 |
| POS09753 | 25586811.65 | 22342267.55 | -0.19562 | 0.410087 | 0.6751 | 1.11603 | Dichlorphemide                                                                                      | -10.507569 | - | - | - | 33.2381  | 306.16287  |
| POS09755 | 1035655.096 | 901519.6995 | -0.20011 | 0.221185 | 0.5422 | 0.22275 | Chloramphenicol 3-acetate                                                                           | -2.6271181 | - | - | - | 33.2097  | 366.172417 |
| POS09760 | 39795.19647 | 35074.20647 | -0.18218 | 0.325932 | 0.6316 | 0.04584 | Acetaminophen glucuronide                                                                           | 15.700858  | - | - | - | 33.1754  | 328.299115 |
| POS09765 | 183205.5534 | 70124.77082 | -1.38547 | 0.190997 | 0.5179 | 0.22578 | Neoastilbin                                                                                         | -11.741226 | - | - | - | 33.1713  | 451.394788 |
| POS09766 | 134133.0634 | 128840.5312 | -0.05808 | 0.867176 | 0.9403 | 0.00123 | Quercetin 3-O-(beta-D-xylosyl-(1-&gt;2)-beta-D-3,4,5-trihydroxy-b-(11-                              | -20.199669 | - | - | - | 33.1713  | 597.486128 |
| POS09767 | 120323.7027 | 44560.02093 | -1.4331  | 0.07068  | 0.3578 | 0.21097 | methoxy-13-oxo-6,8,20-trioxoantonylosyl-10,8,10-trihydroxy-13-oxo-6,8,20-trioxoantonylosyl-10,8,10- | -17.222757 | - | - | - | 33.1669  | 501.410658 |
| POS09768 | 147360.762  | 60605.54602 | -1.28183 | 0.124198 | 0.4422 | 0.21124 | hydroxy-13-oxo-6,8,20-trioxoantonylosyl-10,8,10-                                                    | 4.8061068  | - | - | - | 33.16485 | 489.410624 |
| POS09770 | 81298.62581 | 57520.46303 | -0.49916 | 0.131009 | 0.4499 | 0.11602 | Nicergoline                                                                                         | 9.2705462  | - | - | - | 33.1584  | 485.397767 |

|          |             |             |          |          |        |         |                                                                                                                  |            |   |   |   |          |            |
|----------|-------------|-------------|----------|----------|--------|---------|------------------------------------------------------------------------------------------------------------------|------------|---|---|---|----------|------------|
| POS09774 | 67518.22688 | 62745.18365 | -0.10577 | 0.622027 | 0.8124 | 0.01854 | Dikegulac                                                                                                        | -5.1130109 | - | - | - | 33.138   | 275.272974 |
| POS09776 | 90850.70458 | 51087.06014 | -0.83054 | 0.016086 | 0.2228 | 0.16494 | Ephedrannin A                                                                                                    | -14.566298 | - | - | - | 33.1378  | 557.472371 |
| POS09777 | 265702.4362 | 96909.83669 | -1.4551  | 0.11865  | 0.4338 | 0.29894 | 6-Hydroxyluteolin 6-xyloside                                                                                     | 10.314983  | - | - | - | 33.13485 | 435.362057 |
| POS09778 | 313736.6223 | 214660.3091 | -0.5475  | 0.663829 | 0.8345 | 0.16733 | Nitarson                                                                                                         | 23.811469  | - | - | - | 33.1317  | 248.050259 |
| POS09779 | 132135.0295 | 105031.3706 | -0.33119 | 0.347286 | 0.6349 | 0.10653 | Biochanin A-beta-D-glucoside                                                                                     | -21.915085 | - | - | - | 33.1317  | 447.401594 |
| POS09782 | 160425.7089 | 36235.22776 | -2.14644 | 0.094261 | 0.3975 | 0.2623  | 3',5'-Cyclic AMP                                                                                                 | 23.274332  | - | - | - | 33.1293  | 330.220839 |
| POS09783 | 124397.1377 | 103743.3281 | -0.26193 | 0.163935 | 0.4916 | 0.08815 | 1,5,5-trimethoxy-2-(3,6,7-trihydroxy-4-oxo-2-phenyl-4H-chroman-8-Delphinidin 3-O-(6"-O-malonyl)-beta-D-glucoside | 3.0347605  | - | - | - | 33.1292  | 483.418741 |
| POS09784 | 1262251.196 | 1181817.508 | -0.09499 | 0.58826  | 0.7904 | 0.12417 | Delphinidin 3-O-(6"-O-malonyl)-beta-D-glucoside                                                                  | -16.64424  | - | - | - | 33.12685 | 552.428498 |
| POS09786 | 88263.17787 | 50307.97475 | -0.81102 | 0.03503  | 0.2838 | 0.15468 | Nocardicin E                                                                                                     | 9.3707675  | - | - | - | 33.1182  | 400.365219 |
| POS09787 | 212833.7214 | 156071.2358 | -0.44752 | 0.188892 | 0.516  | 0.14971 | Bicalutamide                                                                                                     | 5.8604708  | - | - | - | 33.1167  | 431.383199 |
| POS09788 | 166073.3669 | 147358.4853 | -0.17249 | 0.386174 | 0.6583 | 0.08084 | Quercetin 3,3'-bissulfate                                                                                        | 16.059074  | - | - | - | 33.1167  | 463.376802 |
| POS09789 | 32114.6452  | 26437.12638 | -0.28067 | 0.471329 | 0.719  | 0.03578 | o-([11-(2-([12-(3,4-dimethoxyphenyl)ethyl]-C                                                                     | 0.8565764  | - | - | - | 33.11595 | 552.552749 |
| POS09791 | 33917.31577 | 28942.78001 | -0.22882 | 0.564321 | 0.7766 | 0.02665 | Dopaxanthin                                                                                                      | 11.827526  | - | - | - | 33.1105  | 391.355993 |
| POS09794 | 1157578.29  | 935452.679  | -0.30737 | 0.219738 | 0.5406 | 0.28084 | o-([2-[4-ethyl-3-(sulfooxyphenyl)]-3,5-dihydroxy-2,4-dihydro-7-Methoxypradimicinone II                           | -13.339102 | - | - | - | 33.1058  | 559.509827 |
| POS09799 | 234935.2034 | 50766.11315 | -2.21033 | 0.233153 | 0.554  | 0.25394 | 7-Methoxypradimicinone II                                                                                        | -0.5185055 | - | - | - | 33.09775 | 580.515276 |
| POS09809 | 119165.0489 | 39716.8126  | -1.58514 | 0.095983 | 0.4006 | 0.20843 | (2-([12-(3,4-dihydroxyphenyl)]-5,7-dihydroxy-4-oxo-2,4                                                           | 9.0032158  | - | - | - | 33.0525  | 517.441926 |
| POS09813 | 49342.4723  | 36335.36835 | -0.44146 | 0.104642 | 0.4116 | 0.075   | Gardenoside                                                                                                      | -3.5073289 | - | - | - | 33.0306  | 405.371758 |
| POS09816 | 553015.0783 | 500791.067  | -0.14311 | 0.360577 | 0.6432 | 0.10816 | ringin                                                                                                           | -23.773822 | - | - | - | 33.0149  | 581.528075 |
| POS09820 | 156167.8003 | 36614.28466 | -2.09262 | 0.13783  | 0.4613 | 0.24187 | Tolylfluanid                                                                                                     | 11.056574  | - | - | - | 33.012   | 348.267916 |
| POS09822 | 123306.6386 | 130478.071  | 0.081557 | 0.701819 | 0.8538 | 0.03009 | Muscapurpurin                                                                                                    | -9.891907  | - | - | - | 33.012   | 419.314339 |
| POS09824 | 137328.2515 | 97697.72881 | -0.49123 | 0.049782 | 0.3188 | 0.15041 | N-([1,8-Diminyropterin-6-yl)methyl]-4-(beta-D-ribofuranosyl)aniline 5'                                           | -19.427401 | - | - | - | 33.012   | 483.382305 |
| POS09828 | 166083.6764 | 26135.3524  | -2.66784 | 0.182402 | 0.5082 | 0.25019 | Carboplatin                                                                                                      | 17.989448  | - | - | - | 32.98635 | 372.267955 |
| POS09829 | 95141.43323 | 59015.89767 | -0.68897 | 0.068063 | 0.3534 | 0.13658 | 3,4,5-trimethoxy-6-(3-hydroxy-6-methoxy-4-oxo-2-phenyl-4H                                                        | -2.6057953 | - | - | - | 32.98605 | 461.397077 |

|          |             |             |          |          |        |         |                                                                        |            |   |   |   |          |            |
|----------|-------------|-------------|----------|----------|--------|---------|------------------------------------------------------------------------|------------|---|---|---|----------|------------|
| POS09832 | 173496.4202 | 95725.77538 | -0.85793 | 0.231666 | 0.553  | 0.18936 | 3,4,5-trinydroxy-6-[1-(1-methoxy-2-oxo-2H-chromen-6-yl)-2              | 3.2908178  | - | - | - | 32.9734  | 439.393719 |
| POS09834 | 115612.6231 | 160379.3904 | 0.47219  | 0.662494 | 0.8336 | 0.07662 | 9-Bromo-16alpha-methylpregn-4-ene-3,11,20-trione                       | 4.4835504  | - | - | - | 32.9607  | 422.377066 |
| POS09836 | 52948.43419 | 46689.81142 | -0.18148 | 0.50936  | 0.7445 | 0.03413 | Mahuannin D                                                            | 7.1049743  | - | - | - | 32.9598  | 529.517232 |
| POS09845 | 155586.2922 | 67029.67355 | -1.21484 | 0.130196 | 0.4485 | 0.20754 | [2-(3,7-dinydroxy-4-oxo-2-phenyl-4H-chromen-6-yl)-3-hydroxy-6-methyl-5 | -2.1150026 | - | - | - | 32.92925 | 479.426265 |
| POS09846 | 83656.32249 | 43016.3925  | -0.95959 | 0.027878 | 0.2623 | 0.16032 | Tetraphyllin B sulfate                                                 | -15.972919 | - | - | - | 32.92595 | 368.330409 |
| POS09847 | 179810.0787 | 81466.58913 | -1.14219 | 0.147022 | 0.4726 | 0.20281 | Lamiide                                                                | -16.381765 | - | - | - | 32.9255  | 423.381457 |
| POS09848 | 151485.9485 | 28946.93878 | -2.3877  | 0.163962 | 0.4916 | 0.24018 | Prothiofos                                                             | -1.3036138 | - | - | - | 32.9107  | 346.252227 |
| POS09849 | 130456.1887 | 60507.61189 | -1.10838 | 0.165544 | 0.4924 | 0.18129 | 2"-O-Acetylisoorientin                                                 | 10.4085    | - | - | - | 32.9071  | 491.425981 |
| POS09850 | 98918.25274 | 62157.89064 | -0.6703  | 0.177364 | 0.5035 | 0.11683 | Neolinustatin                                                          | -13.883317 | - | - | - | 32.9071  | 424.413698 |
| POS09856 | 127948.8921 | 51916.38821 | -1.30131 | 0.067496 | 0.3525 | 0.21403 | Nilutamide                                                             | -22.069487 | - | - | - | 32.88765 | 318.220976 |
| POS09858 | 402016.7296 | 523052.625  | 0.379701 | 0.64677  | 0.8266 | 0.17775 | N-Acetyl-N(6),N(6),O-tridemethylpuromycin-5'-phosphate                 | 3.6184407  | - | - | - | 32.8673  | 552.455672 |
| POS09859 | 169280.3303 | 29099.70359 | -2.54034 | 0.212316 | 0.5354 | 0.24184 | Apholate                                                               | -22.358294 | - | - | - | 32.841   | 388.299117 |
| POS09862 | 99282.52211 | 60422.39189 | -0.71646 | 0.018043 | 0.2285 | 0.16324 | N'-Phosphoguanidinoethyl methyl phosphate                              | 13.638626  | - | - | - | 32.8298  | 278.120456 |
| POS09865 | 85533.32197 | 101605.003  | 0.248413 | 0.515427 | 0.7477 | 0.05582 | Tetracenomycin E                                                       | 4.8754574  | - | - | - | 32.81365 | 409.366868 |
| POS09866 | 1457224.666 | 1266014.712 | -0.20293 | 0.174428 | 0.5007 | 0.30938 | (4-[2,5-dioxo-3-(2,4,6-trihydroxy-3-methoxyphenyl)propyl]-2            | 10.087912  | - | - | - | 32.7907  | 429.371598 |
| POS09868 | 84936.66205 | 63533.0268  | -0.41888 | 0.315463 | 0.6247 | 0.08518 | Secogalioside                                                          | -15.972392 | - | - | - | 32.7885  | 421.365862 |
| POS09869 | 169745.7669 | 139478.5224 | -0.28333 | 0.535744 | 0.7591 | 0.08264 | Cinchoin 1a                                                            | -15.902501 | - | - | - | 32.7885  | 453.410282 |
| POS09870 | 101192.8968 | 86662.2746  | -0.22363 | 0.529619 | 0.757  | 0.04552 | Lippioside I                                                           | -6.2865549 | - | - | - | 32.7853  | 539.501791 |
| POS09871 | 198712.9627 | 187524.5217 | -0.08361 | 0.908394 | 0.9578 | 0.00487 | Mefluidide                                                             | -19.96574  | - | - | - | 32.78375 | 311.293781 |
| POS09872 | 172721.026  | 103339.4415 | -0.74105 | 0.179688 | 0.5058 | 0.17184 | Permethrin                                                             | -20.309378 | - | - | - | 32.78375 | 392.28703  |
| POS09875 | 191613.7734 | 144875.0629 | -0.40339 | 0.374087 | 0.6502 | 0.13297 | 6-[1,5-dinydroxy-2-(1-hydroxy-3-methoxy-4-oxocyclohexyl)-6             | 6.9789515  | - | - | - | 32.7832  | 543.457062 |
| POS09876 | 108662.2909 | 47080.07084 | -1.20666 | 0.130985 | 0.4499 | 0.17592 | Triflusulfuron-methyl                                                  | 9.7631489  | - | - | - | 32.7814  | 493.441684 |
| POS09879 | 109274.2964 | 51731.39277 | -1.07884 | 0.142341 | 0.4668 | 0.16014 | 4-Deoxy-beta-D-gluc-4-enuronosyl-(1,3)-N-acetyl-D-galactosamine        | 16.597942  | - | - | - | 32.7739  | 380.330172 |

|          |             |             |          |          |        |         |                                                                                |            |   |   |   |          |            |
|----------|-------------|-------------|----------|----------|--------|---------|--------------------------------------------------------------------------------|------------|---|---|---|----------|------------|
| POS09881 | 106547.5929 | 65202.47754 | -0.7085  | 0.086651 | 0.3863 | 0.14674 | Isoscoparine                                                                   | 4.2226292  | - | - | - | 32.7739  | 463.412729 |
| POS09882 | 136259.0979 | 63792.93644 | -1.09488 | 0.14637  | 0.4718 | 0.17915 | 12-(5,7-dimethoxy-4-oxo-2-phenyl-4H-chromen-8-yl)-3,5-dihydroxybenzoic acid    | 18.558565  | - | - | - | 32.77015 | 467.425933 |
| POS09884 | 179404.1001 | 202424.9739 | 0.174174 | 0.755884 | 0.8865 | 0.06039 | Epitheaflagallin 3-O-gallate                                                   | 23.837075  | - | - | - | 32.76885 | 553.460345 |
| POS09887 | 148145.022  | 34307.01303 | -2.11043 | 0.194728 | 0.5203 | 0.22566 | Validoxylamine A 7'-phosphate                                                  | -17.43423  | - | - | - | 32.7633  | 416.330136 |
| POS09892 | 406935.2713 | 244152.2879 | -0.73702 | 0.065825 | 0.3485 | 0.31666 | Salviaflaside methyl ester                                                     | -6.1744512 | - | - | - | 32.7409  | 537.485964 |
| POS09897 | 119127.5834 | 57591.42261 | -1.04858 | 0.161898 | 0.4894 | 0.16567 | Raffinose                                                                      | -5.2019661 | - | - | - | 32.6896  | 505.441753 |
| POS09898 | 164554.7147 | 153019.0623 | -0.10486 | 0.540021 | 0.7619 | 0.04362 | 3-Hydroxykynurenine                                                            | 1.9690688  | - | - | - | 32.6868  | 225.221018 |
| POS09907 | 273454.2173 | 111574.5109 | -1.29329 | 0.015874 | 0.2226 | 0.32905 | Isorhamnetin 3-(6"-malonylglucoside)                                           | 9.5297496  | - | - | - | 32.65505 | 565.461756 |
| POS09909 | 51909.74667 | 66343.60748 | 0.353952 | 0.351277 | 0.6364 | 0.07324 | Sulfazecin                                                                     | 2.8280456  | - | - | - | 32.64445 | 397.381998 |
| POS09910 | 113984.9096 | 40381.11105 | -1.49709 | 0.277887 | 0.5938 | 0.16564 | N-Acetylaspartylglutamylglutamate                                              | 5.3873635  | - | - | - | 32.638   | 434.376911 |
| POS09912 | 80826.63694 | 46778.5414  | -0.78898 | 0.164129 | 0.4916 | 0.12622 | Tercozole                                                                      | 5.5292837  | - | - | - | 32.6049  | 533.472221 |
| POS09914 | 113524.1508 | 188997.2763 | 0.735366 | 0.028598 | 0.2639 | 0.24256 | 2-Aminoadenosine                                                               | -2.0976388 | - | - | - | 32.593   | 283.262685 |
| POS09919 | 80534.38141 | 54201.0962  | -0.57128 | 0.271618 | 0.5888 | 0.09238 | Sodium folite                                                                  | 13.105973  | - | - | - | 32.58255 | 496.43487  |
| POS09920 | 129623.1122 | 133236.5741 | 0.039667 | 0.951226 | 0.9785 | 0.02629 | Pteric acid                                                                    | -8.4629845 | - | - | - | 32.5713  | 313.288134 |
| POS09921 | 75581.34338 | 56366.1182  | -0.4232  | 0.372648 | 0.6502 | 0.08132 | Violaceinic acid                                                               | 2.504928   | - | - | - | 32.5713  | 374.369712 |
| POS09922 | 163431.1592 | 79412.776   | -1.04124 | 0.231197 | 0.553  | 0.18195 | Sakuranin                                                                      | 14.865897  | - | - | - | 32.5602  | 449.433943 |
| POS09923 | 108238.7862 | 75905.65359 | -0.51194 | 0.297968 | 0.6114 | 0.10535 | Cassiamin C                                                                    | -17.657069 | - | - | - | 32.5602  | 507.457434 |
| POS09924 | 65005.65995 | 75902.75174 | 0.223587 | 0.750355 | 0.8829 | 0.03709 | 3'-Phosphoadenylylselete                                                       | 15.19398   | - | - | - | 32.5602  | 555.174996 |
| POS09925 | 123006.3157 | 175984.5951 | 0.516717 | 0.187773 | 0.5138 | 0.14452 | TG(14:0/24:1(15Z)/o-18:0)                                                      | 0.3040461  | - | - | - | 32.5602  | 904.563551 |
| POS09926 | 189763.5938 | 72019.87979 | -1.39774 | 0.148855 | 0.4745 | 0.27184 | (x)-1,2-Propanediol 1-O-beta-D-glucopyranoside                                 | -23.406418 | - | - | - | 32.5552  | 239.2367   |
| POS09928 | 111070.4721 | 40006.04292 | -1.47319 | 0.280659 | 0.5965 | 0.16108 | Cyanidin 3-arabinoside                                                         | -11.526547 | - | - | - | 32.53505 | 420.361343 |
| POS09933 | 152393.4791 | 82353.3218  | -0.8879  | 0.065098 | 0.3462 | 0.19659 | (11,15-dimethoxy-15-oxo-6,8,20-trioxoantennic acid) 8-O-beta-D-glucopyranoside | -0.0192196 | - | - | - | 32.4994  | 437.397268 |
| POS09934 | 423108.3705 | 380938.9242 | -0.15147 | 0.234559 | 0.5554 | 0.12197 | Syringin                                                                       | -20.858033 | - | - | - | 32.4991  | 373.36661  |



|          |             |             |          |          |        |         |                                                                                                                      |            |   |   |   |          |            |
|----------|-------------|-------------|----------|----------|--------|---------|----------------------------------------------------------------------------------------------------------------------|------------|---|---|---|----------|------------|
| POS09937 | 81372.81791 | 65942.52146 | -0.30334 | 0.229644 | 0.5507 | 0.07292 | o-beta-D-Glucopyranosyl-4',5'-dihydroxy-3',7'-dimethoxyflavone                                                       | -18.627427 | - | - | - | 32.4988  | 477.428502 |
| POS09949 | 365257.3518 | 165816.1883 | -1.13933 | 0.278487 | 0.5941 | 0.24122 | Diloxanide furoate                                                                                                   | 12.409635  | - | - | - | 32.45005 | 329.158749 |
| POS09958 | 137296.76   | 133511.768  | -0.04033 | 0.861972 | 0.9375 | 0.01546 | Inumakilactone A glycoside                                                                                           | 13.927121  | - | - | - | 32.42965 | 527.501809 |
| POS09960 | 108799.8598 | 81937.56225 | -0.40908 | 0.205858 | 0.5304 | 0.09412 | Betanin                                                                                                              | 9.8854037  | - | - | - | 32.4211  | 551.481518 |
| POS09964 | 74942.38695 | 51050.14833 | -0.55387 | 0.19834  | 0.524  | 0.0947  | o-[[o-(3,4-dimethoxy-6-methyl-5-oxooxan-2-yl)-2',3',4'-trihydroxy-6''-(15-hydroxy-11,17,18-trimethoxy-12-oxo-6,8,20- | -8.2074153 | - | - | - | 32.39655 | 607.491299 |
| POS09965 | 185908.8373 | 114565.6974 | -0.69842 | 0.121589 | 0.4392 | 0.16698 | hydroxy-11,17,18-trimethoxy-12-oxo-6,8,20-                                                                           | -7.5393773 | - | - | - | 32.37445 | 577.46593  |
| POS09966 | 197199.7869 | 134131.6889 | -0.55601 | 0.291571 | 0.6056 | 0.11679 | Clofazimine glucuronide                                                                                              | 0.0704452  | - | - | - | 32.37445 | 666.527323 |
| POS09970 | 155332.3891 | 154925.1087 | -0.00379 | 0.986892 | 0.9932 | 0.00048 | 4'-Methylisoscutellarein 8-(2''-sulfoglucoside)                                                                      | 6.0480258  | - | - | - | 32.3526  | 543.477557 |
| POS09974 | 94153.34706 | 68768.60034 | -0.45326 | 0.193285 | 0.5192 | 0.10352 | Genipin 1-beta-gentiobioside                                                                                         | -23.192225 | - | - | - | 32.3492  | 551.501609 |
| POS09976 | 102516.3528 | 74275.86076 | -0.46489 | 0.073525 | 0.3639 | 0.12187 | Hesperetin 7-O-glucoside                                                                                             | 4.2282192  | - | - | - | 32.3444  | 465.42864  |
| POS09977 | 107860.1036 | 82240.55767 | -0.39124 | 0.301611 | 0.6145 | 0.09505 | [2,2-dimethyl-6-(3,5,7-trihydroxy-4-oxo-4H-chroman-2-yl)3,4-                                                         | -10.074426 | - | - | - | 32.3396  | 451.412739 |
| POS09979 | 72797.35751 | 79581.22157 | 0.128542 | 0.647055 | 0.8267 | 0.03498 | Iridin                                                                                                               | 14.99659   | - | - | - | 32.31    | 523.470512 |
| POS09981 | 21997.53782 | 46790.02562 | 1.088859 | 0.051218 | 0.3203 | 0.12548 | TG(14:1(9Z)/24:1(15Z)/o-18:0)                                                                                        | 0.9921491  | - | - | - | 32.31    | 902.548171 |
| POS09982 | 50876.85199 | 56838.80649 | 0.159867 | 0.798559 | 0.9083 | 0.00025 | 3-Iodo-L-tyrosine                                                                                                    | 6.4614057  | - | - | - | 32.2551  | 308.094361 |
| POS09985 | 927486.208  | 241370.8577 | -1.94207 | 0.260827 | 0.5788 | 0.47465 | 3,4,5-trimethoxy-o-[[2'-hydroxy-2-(3-hydroxyphenyl)4-oxo-                                                            | 15.117545  | - | - | - | 32.2544  | 579.495022 |
| POS09991 | 93229.24285 | 59730.00387 | -0.64233 | 0.132938 | 0.4532 | 0.138   | Carmoisine                                                                                                           | 18.331309  | - | - | - | 32.22585 | 503.444487 |
| POS09995 | 213216.7225 | 164272.1943 | -0.37623 | 0.447419 | 0.7021 | 0.09062 | 3',5'-Diiodo-L-thyronine-beta-D-glucuronoside                                                                        | 4.0572035  | - | - | - | 32.2113  | 702.211222 |
| POS10000 | 468939.1524 | 360457.2199 | -0.37957 | 0.833974 | 0.9241 | 0.176   | Amritoside                                                                                                           | -3.4872416 | - | - | - | 32.1643  | 627.478892 |
| POS10001 | 78804.38921 | 99240.90057 | 0.332659 | 0.090262 | 0.3896 | 0.10136 | 11-[[o-carboxy-3,4,5-trihydroxyoxan-2-yl)oxy]-6-hydroxy-2                                                            | -19.51764  | - | - | - | 32.15595 | 534.413866 |
| POS10002 | 107886.3203 | 113717.0756 | 0.075937 | 0.69483  | 0.8493 | 0.02665 | Streptonigrin                                                                                                        | 8.1838684  | - | - | - | 32.14355 | 507.475621 |
| POS10003 | 83319.57758 | 68851.01639 | -0.27518 | 0.150737 | 0.477  | 0.07265 | Gentiobiosyl 2-methyl-6-oxo-2E,4E-heptadienoate                                                                      | -15.240446 | - | - | - | 32.1355  | 479.444385 |
| POS10004 | 327793.6127 | 391084.0043 | 0.254691 | 0.288693 | 0.603  | 0.14751 | Myricatin                                                                                                            | 17.375772  | - | - | - | 32.13355 | 553.434875 |
| POS10012 | 68433.94602 | 47953.51667 | -0.51308 | 0.082487 | 0.3788 | 0.11181 | 1-Hydroxy-3-methoxy-7-primeverosyloxyxanthone                                                                        | 10.084444  | - | - | - | 32.1031  | 553.497848 |

|          |             |             |          |          |        |         |                                                                                                  |            |   |   |   |          |            |
|----------|-------------|-------------|----------|----------|--------|---------|--------------------------------------------------------------------------------------------------|------------|---|---|---|----------|------------|
| POS10015 | 70379.62539 | 73250.19946 | 0.057675 | 0.75786  | 0.8874 | 0.01626 | Dehypoxanthine<br>fufalosine                                                                     | -5.5846853 | - | - | - | 32.0875  | 297.278222 |
| POS10024 | 163251.2557 | 107041.918  | -0.60892 | 0.243227 | 0.5621 | 0.12883 | TG(14:1(9Z)/18:0/14:1(9Z))                                                                       | -16.203467 | - | - | - | 32.0494  | 776.230015 |
| POS10027 | 77537.14882 | 67918.5698  | -0.19108 | 0.527737 | 0.756  | 0.05026 | (2-(2,7-dimethoxy-4-hydroxy-3-methoxyphenyl)-4-oxo-5,6-dihydro-2H-pyridin-6-ylidene)malonate     | 20.103274  | - | - | - | 32.0142  | 525.46782  |
| POS10028 | 82497.43707 | 85902.17811 | 0.058345 | 0.877806 | 0.9458 | 0.00796 | Sclerocitrin                                                                                     | 8.3938259  | - | - | - | 32.0142  | 727.563075 |
| POS10029 | 93073.26738 | 70572.94349 | -0.39925 | 0.341279 | 0.6326 | 0.07818 | Rheidin B                                                                                        | 17.802735  | - | - | - | 32.0139  | 509.491329 |
| POS10032 | 128817.0115 | 106288.7129 | -0.27733 | 0.208379 | 0.5321 | 0.08642 | Chryso-obtusin glucoside                                                                         | 3.1381184  | - | - | - | 32.006   | 521.49151  |
| POS10035 | 433452.5281 | 323605.4064 | -0.42164 | 0.087873 | 0.3872 | 0.22636 | Justicidin A                                                                                     | 14.599756  | - | - | - | 31.9337  | 395.387134 |
| POS10037 | 277525.5223 | 348486.2927 | 0.328481 | 0.695175 | 0.8495 | 0.07887 | Actinorhodin                                                                                     | -8.8725728 | - | - | - | 31.9249  | 635.542047 |
| POS10042 | 58445.13203 | 57533.0193  | -0.02269 | 0.941004 | 0.9734 | 0.00548 | 5,4,5-trimethoxy-6-(3-hydroxyphenyl)-7-hydroxy-2-(4-hydroxyphenyl)-2H-pyridin-6-ylidene malonate | 24.624509  | - | - | - | 31.90395 | 567.533227 |
| POS10043 | 64055.23259 | 49538.81373 | -0.37076 | 0.118388 | 0.4333 | 0.08644 | Flavonol 3-O-D-xylosylglucoside                                                                  | -17.472144 | - | - | - | 31.89765 | 533.491273 |
| POS10044 | 165076.9982 | 161410.7443 | -0.0324  | 0.850466 | 0.9322 | 0.01604 | (3,4,5-trihydroxyphenyl)-2,4-dihydro-2H-pyridin-6-ylidene malonate                               | 18.865863  | - | - | - | 31.89765 | 539.447435 |
| POS10046 | 101785.4138 | 120732.7077 | 0.246286 | 0.316742 | 0.6253 | 0.0865  | Luteolin 7-O-(6"-malonylglucoside)                                                               | -0.953953  | - | - | - | 31.8767  | 535.429867 |
| POS10047 | 232912.7787 | 248698.4681 | 0.094608 | 0.89807  | 0.9529 | 0.02196 | Caloxetate trisodium                                                                             | -21.78691  | - | - | - | 31.8767  | 632.522718 |
| POS10052 | 51222.93972 | 57283.78966 | 0.161337 | 0.473905 | 0.7203 | 0.03723 | 1,3-Dicaffeoylquinic acid                                                                        | 4.1159842  | - | - | - | 31.875   | 517.460302 |
| POS10055 | 497182.3443 | 469195.762  | -0.08359 | 0.548391 | 0.7686 | 0.08671 | 6-beta-Hydroxy-mometasone furoate                                                                | 16.024865  | - | - | - | 31.8519  | 538.444889 |
| POS10056 | 180793.3308 | 129676.4134 | -0.47943 | 0.747989 | 0.8814 | 0.12433 | 2'-C-Methylmyricetin 3-rhamnoside 5'-gallate                                                     | -4.9743066 | - | - | - | 31.8476  | 631.51124  |
| POS10057 | 119602.394  | 107030.9622 | -0.16022 | 0.378632 | 0.6529 | 0.06114 | N-Acetyl-N6,6'-didemethylpuromycin-5'-phosphate                                                  | -6.8834567 | - | - | - | 31.8288  | 566.476384 |
| POS10075 | 101498.142  | 57706.71948 | -0.81464 | 0.231465 | 0.553  | 0.11572 | 22:1(13Z)/20:4(8Z,11Z,14Z)triacylglycerol                                                        | 0.3949989  | - | - | - | 31.76565 | 851.249312 |
| POS10076 | 38575.737   | 40345.95334 | 0.06473  | 0.892573 | 0.9506 | 0.00458 | Sceptrin                                                                                         | 2.7983539  | - | - | - | 31.7622  | 621.308812 |
| POS10078 | 274855.9942 | 210606.8217 | -0.38412 | 0.104844 | 0.4118 | 0.18674 | DH                                                                                               | 19.178641  | - | - | - | 31.75875 | 666.461039 |
| POS10080 | 96798.16344 | 99627.51409 | 0.041565 | 0.877297 | 0.9458 | 0.01139 | Dalpanin                                                                                         | -19.159072 | - | - | - | 31.7524  | 535.506236 |
| POS10082 | 92322.95278 | 75670.71218 | -0.28695 | 0.223826 | 0.5455 | 0.09144 | 2-(2,5-dimethoxy-4-methoxyphenyl)-5,7-dihydroxy-6,8-dimethyl-2H-pyridin-6-ylidene malonate       | 22.035472  | - | - | - | 31.7524  | 611.54173  |
| POS10083 | 152955.4141 | 131208.0782 | -0.22125 | 0.392556 | 0.662  | 0.07066 | Calcium Gluceptate                                                                               | 24.479849  | - | - | - | 31.726   | 491.444282 |

|          |             |             |          |          |        |         |                                                                                                   |            |   |   |   |          |            |
|----------|-------------|-------------|----------|----------|--------|---------|---------------------------------------------------------------------------------------------------|------------|---|---|---|----------|------------|
| POS10087 | 385285.3563 | 466267.2108 | 0.27523  | 0.218093 | 0.5394 | 0.18546 | 5,5',5,5'-tetraaryloxy-6,6'-methylenedioxy-4'-methoxyflavone-3-O- <sup>2</sup> -acetylgalactoside | -18.683685 | - | - | - | 31.71415 | 537.393155 |
| POS10089 | 64820.58939 | 76958.80015 | 0.247634 | 0.742307 | 0.8786 | 0.03901 | acetylgalactoside 7-chromone                                                                      | -7.4556043 | - | - | - | 31.6993  | 637.557331 |
| POS10092 | 60342.76647 | 42995.92576 | -0.48898 | 0.079087 | 0.3738 | 0.09335 | TG(16:0/24:0/0-18:0)                                                                              | 3.9864089  | - | - | - | 31.6817  | 934.636998 |
| POS10096 | 50825.9574  | 36872.16839 | -0.46303 | 0.026402 | 0.2576 | 0.09748 | Ferrocyclochrome                                                                                  | 21.42462   | - | - | - | 31.6759  | 605.497227 |
| POS10097 | 86574.26742 | 107372.7245 | 0.310617 | 0.30621  | 0.6184 | 0.0924  | (2-((2-(3,4-dihydroxyphenyl)-5,7-dihydroxy-4-oxo-2H                                               | -12.760092 | - | - | - | 31.67525 | 515.410713 |
| POS10098 | 245221.0766 | 118370.7495 | -1.05077 | 0.179533 | 0.5056 | 0.21161 | Dynemicin A                                                                                       | 0.6838205  | - | - | - | 31.6724  | 538.480844 |
| POS10099 | 1106326.52  | 1279120.22  | 0.209375 | 0.303343 | 0.6157 | 0.24722 | Cyanidin 3-O-(6-O-malonyl-beta-D-glucoside)                                                       | -5.0598627 | - | - | - | 31.67175 | 536.435567 |
| POS10103 | 41592.89885 | 55432.80185 | 0.414403 | 0.574468 | 0.7822 | 0.04312 | Luteolin 7-O-beta-D-glucuronosyl-(1-&gt;2)-beta-D-glucuronide                                     | 4.524944   | - | - | - | 31.627   | 639.494666 |
| POS10106 | 22457.47391 | 11141.75104 | -1.01122 | 0.285049 | 0.6008 | 0.05333 | NMe2(18:3(6Z,9Z,12Z)/2                                                                            | 8.6550708  | - | - | - | 31.60485 | 853.246653 |
| POS10107 | 29963.65347 | 28504.46245 | -0.07203 | 0.872079 | 0.9428 | 0.00388 | Amaroswerin                                                                                       | -24.833435 | - | - | - | 31.59615 | 603.532413 |
| POS10108 | 20638.20597 | 15826.7751  | -0.38295 | 0.436454 | 0.6941 | 0.0311  | Alnusiin                                                                                          | 4.1083281  | - | - | - | 31.5945  | 935.640616 |
| POS10109 | 156923.4234 | 113704.9564 | -0.46477 | 0.136129 | 0.458  | 0.14269 | Ketoconazole                                                                                      | -1.1554214 | - | - | - | 31.588   | 532.437663 |
| POS10112 | 36749.74668 | 42206.89487 | 0.199744 | 0.627624 | 0.8149 | 0.02905 | 5-Deoxydihydrostreptomycin 6'-phosphate                                                           | 12.949237  | - | - | - | 31.5621  | 728.566998 |
| POS10115 | 393249.724  | 482325.3249 | 0.294561 | 0.217652 | 0.5387 | 0.19522 | 1,4-beta-D-Glucan                                                                                 | -7.7806826 | - | - | - | 31.5472  | 537.439003 |
| POS10132 | 114410.5263 | 50847.41393 | -1.16997 | 0.121861 | 0.4395 | 0.1615  | PC(DiMe(11,3)/DiMe(13,5))                                                                         | -10.680492 | - | - | - | 31.4401  | 924.266716 |
| POS10136 | 143084.6149 | 140306.9612 | -0.02828 | 0.936157 | 0.9714 | 0.00429 | Medicarpin 3-O-glucoside-6'-malate                                                                | 3.2224304  | - | - | - | 31.43465 | 519.475647 |
| POS10142 | 62469.87626 | 40431.21517 | -0.62769 | 0.009858 | 0.194  | 0.13284 | 2,3,4,1,8,9,10,22,23,28-decahydroxy-14-(hydroxymethyl)                                            | 4.6661101  | - | - | - | 31.41805 | 711.519592 |
| POS10144 | 9227.059235 | 21776.30607 | 1.238816 | 0.094591 | 0.3981 | 0.08633 | Rhamnazin 3-rutinoside                                                                            | -7.8926346 | - | - | - | 31.3936  | 639.572937 |
| POS10154 | 43046.76962 | 28651.36502 | -0.5873  | 0.001285 | 0.084  | 0.11694 | Molybdopterin guanine dinucleotide                                                                | 2.5927489  | - | - | - | 31.2388  | 739.550491 |
| POS10160 | 296782.9288 | 236219.2662 | -0.32928 | 0.177286 | 0.5035 | 0.1522  | Celecoxib glucuronide                                                                             | -12.791582 | - | - | - | 31.09205 | 560.46912  |
| POS10162 | 61158.56954 | 55698.66563 | -0.13491 | 0.815872 | 0.9163 | 0.01504 | DG(22:4(7Z,10Z,13Z,16Z)/24:0/0:0)                                                                 | -10.861184 | - | - | - | 31.08755 | 758.219052 |
| POS10165 | 50769.05654 | 51103.02665 | 0.009459 | 0.990685 | 0.9953 | 0.00584 | 0-((2-(4-((2E)-3-(4-hydroxyphenyl)but-2                                                           | -22.17899  | - | - | - | 31.0837  | 873.769919 |
| POS10169 | 182693.0966 | 222510.6075 | 0.284452 | 0.740936 | 0.8779 | 0.05737 | Chlorhexidine glucote                                                                             | 18.630788  | - | - | - | 31.07815 | 898.781203 |

|          |             |             |          |          |        |         |                                                                                                                                                                  |            |   |   |   |          |            |
|----------|-------------|-------------|----------|----------|--------|---------|------------------------------------------------------------------------------------------------------------------------------------------------------------------|------------|---|---|---|----------|------------|
| POS10171 | 181446.4161 | 243012.5657 | 0.421487 | 0.676294 | 0.8402 | 0.07051 | 0-({3-[2-(3,4-dihydroxyphenyl)-5-hydroxy-4-oxo-7,11,15,3,4,5-trihydroxy-6-(2-hydroxy-4-({3,5,7-trihydroxy-4-(2,5,7-[Gallocatechin(4alpha-&gt;8)]2catechin        | 3.8411383  | - | - | - | 31.0144  | 897.770721 |
| POS10172 | 17588.28174 | 26953.77081 | 0.615873 | 0.540639 | 0.7625 | 0.04816 | hydroxy-4-({3,5,7-trihydroxy-4-(2,5,7-[Gallocatechin(4alpha-&gt;8)]2catechin                                                                                     | 2.1481136  | - | - | - | 31.0144  | 901.801212 |
| POS10173 | 84998.32095 | 113374.7863 | 0.415594 | 0.630312 | 0.8164 | 0.06502 | [Gallocatechin(4alpha-&gt;8)]2catechin                                                                                                                           | 7.7732788  | - | - | - | 30.9441  | 899.785463 |
| POS10174 | 136915.9529 | 160193.7341 | 0.226527 | 0.783693 | 0.9006 | 0.00462 | Octanoyl-CoA                                                                                                                                                     | 14.837877  | - | - | - | 30.8923  | 894.750838 |
| POS10179 | 162099.814  | 144931.1515 | -0.16151 | 0.90704  | 0.9573 | 0.0751  | 2-trans,4-trans-Octadienoyl-CoA                                                                                                                                  | 14.157743  | - | - | - | 30.8034  | 890.718873 |
| POS10185 | 70090.02853 | 61908.75043 | -0.17907 | 0.900725 | 0.9541 | 0.05077 | 2,3-diene-Valproic acid-CoA                                                                                                                                      | 10.761785  | - | - | - | 30.7778  | 891.722862 |
| POS10190 | 7038.658046 | 9846.758114 | 0.484348 | 0.568339 | 0.7786 | 0.0258  | 0-({3-[2-(3,4-dihydroxyphenyl)-4-[2-(3,4-dihydroxyphenyl)Epiafzelechin-(4b-&gt;8)-epicatechin 3,3'-digallate                                                     | 13.899456  | - | - | - | 30.75885 | 821.738684 |
| POS10192 | 35262.15891 | 38076.15613 | 0.110767 | 0.771187 | 0.8941 | 0.01466 | epicatechin 3,3'-digallate                                                                                                                                       | -16.268226 | - | - | - | 30.7389  | 867.722576 |
| POS10194 | 47102.29125 | 68425.56543 | 0.538738 | 0.047194 | 0.3142 | 0.11961 | 2-Decarboxyphyllocactin                                                                                                                                          | -21.569187 | - | - | - | 30.4068  | 594.507975 |
| POS10198 | 329226.0732 | 225096.2919 | -0.54854 | 0.339211 | 0.6326 | 0.17155 | Hypericin                                                                                                                                                        | 18.509853  | - | - | - | 29.9328  | 505.459814 |
| POS10203 | 467631.5306 | 399678.2144 | -0.22653 | 0.211117 | 0.5344 | 0.16491 | Isoimide                                                                                                                                                         | -18.050406 | - | - | - | 29.5579  | 307.15635  |
| POS10209 | 183986.066  | 193599.1877 | 0.073476 | 0.890556 | 0.9499 | 0.01067 | Reduced FMN                                                                                                                                                      | -15.521674 | - | - | - | 29.0927  | 459.359862 |
| POS10210 | 165210.0366 | 47005.9846  | -1.81338 | 0.271098 | 0.5885 | 0.2105  | IAA-94                                                                                                                                                           | 10.940665  | - | - | - | 29.07695 | 358.239585 |
| POS10223 | 106364.7131 | 125858.8479 | 0.242787 | 0.611637 | 0.8067 | 0.05077 | 3,4,5-trihydroxy-6-({11-hydroxy-13-oxo-6,8,20-trioxapentacyclo[10.8.0.0i <sup>cosa</sup> -1(12),2(9),4,10,14(19),15,17-heptaen-15-yl}oxy)oxane-2-carboxylic acid | -1.873796  | - | - | - | 28.6681  | 487.391365 |
| POS10224 | 183074.1157 | 141351.1287 | -0.37314 | 0.019874 | 0.238  | 0.17411 | Validamycin A                                                                                                                                                    | -23.640045 | - | - | - | 28.64545 | 498.486316 |
| POS10225 | 22328.29884 | 55810.63259 | 1.321667 | 0.03601  | 0.2855 | 0.15444 | Carboplatin                                                                                                                                                      | -16.892089 | - | - | - | 28.6402  | 372.255005 |
| POS10236 | 112006.9242 | 71342.52531 | -0.65075 | 0.023936 | 0.2505 | 0.17981 | Oleuropein                                                                                                                                                       | -8.260505  | - | - | - | 28.3777  | 541.516612 |
| POS10238 | 44704.83468 | 28267.20434 | -0.6613  | 0.04705  | 0.314  | 0.10123 | N2-Maltulosylarginine                                                                                                                                            | -0.1836339 | - | - | - | 28.3621  | 499.489385 |

|          |             |             |          |          |        |         |                                                                                                                                   |            |   |   |   |          |            |
|----------|-------------|-------------|----------|----------|--------|---------|-----------------------------------------------------------------------------------------------------------------------------------|------------|---|---|---|----------|------------|
| POS10241 | 40582.29283 | 16096.22027 | -1.33413 | 0.562305 | 0.776  | 0.0706  | (2-([2-(3,4-dihydroxyphenyl)-5,7-dihydroxy-4-oxo-4H-chromen-3-yl]oxy)-4-hydroxy-5-(hydroxymethyl)oxolan-3-yl)oxidanesulfonic acid | 9.9763007  | - | - | - | 28.3459  | 515.422409 |
| POS10245 | 955515.2442 | 644977.526  | -0.56703 | 0.304866 | 0.6169 | 0.34368 | L-3,4-Dihydroxybutan-2-one 4-phosphate                                                                                            | 0.5419161  | - | - | - | 28.1143  | 185.091776 |
| POS10247 | 75975.27132 | 71095.03375 | -0.09578 | 0.671001 | 0.8378 | 0.02593 | Melampodin                                                                                                                        | 1.2870171  | - | - | - | 28.0881  | 523.506449 |
| POS10248 | 48913.96043 | 26615.93183 | -0.87796 | 0.552595 | 0.7706 | 0.05724 | meta-O-Dealkylated flecainide lactam                                                                                              | 15.551175  | - | - | - | 27.9219  | 347.314362 |
| POS10249 | 115771.2737 | 64693.32696 | -0.83959 | 0.519826 | 0.7504 | 0.08869 | Flufecet                                                                                                                          | 8.1835233  | - | - | - | 27.8174  | 364.34075  |
| POS10253 | 93812.97087 | 86695.30096 | -0.11383 | 0.66655  | 0.8359 | 0.03519 | 8-Hydroxypinoresinol 4-glucoside                                                                                                  | -19.64015  | - | - | - | 27.71005 | 537.521839 |
| POS10259 | 21301.64307 | 5242.292369 | -2.02269 | 0.355855 | 0.6395 | 0.06434 | Proacaciberin                                                                                                                     | -14.943815 | - | - | - | 27.35345 | 392.371828 |
| POS10264 | 46770.3642  | 34754.69192 | -0.42839 | 0.028104 | 0.2629 | 0.08791 | 2-[(3,4-dihydroxy-5-[2,4,5-trihydroxy-3-(3,4,5-trihydroxybenzoyloxy)benzoyloxy]phenyl](hydroxy)                                   | -7.5227157 | - | - | - | 26.9981  | 548.384159 |
| POS10267 | 27100572.77 | 20327373.96 | -0.4149  | 0.036037 | 0.2855 | 2.2224  | Calcium hydroxide                                                                                                                 | -4.2311796 | - | - | - | 26.6967  | 75.0996631 |
| POS10268 | 1782838.901 | 1789125.567 | 0.005078 | 0.987783 | 0.9937 | 0.07207 | S-(1,2-Dichlorovinyl)-L-cysteine                                                                                                  | 17.862287  | - | - | - | 26.6967  | 217.096736 |
| POS10275 | 1914110.076 | 1650210.139 | -0.21402 | 0.357978 | 0.6412 | 0.31039 | Tetrahydroxypteridine                                                                                                             | 2.2153943  | - | - | - | 26.0253  | 197.128111 |
| POS10280 | 4336385.836 | 3485470.186 | -0.31514 | 0.547845 | 0.768  | 0.37039 | Urate radical                                                                                                                     | 19.634985  | - | - | - | 25.6525  | 168.112858 |
| POS10300 | 62975.96264 | 98495.98899 | 0.645264 | 0.477327 | 0.7223 | 0.1169  | TG(10:0/10:0/20:0)                                                                                                                | 11.835468  | - | - | - | 24.94065 | 696.138504 |
| POS10301 | 8029.842837 | 22785.64694 | 1.504682 | 0.311532 | 0.6218 | 0.08383 | DG(22:0/0/18:2n6)                                                                                                                 | -3.4383979 | - | - | - | 24.9337  | 692.1399   |
| POS10309 | 2642084.56  | 4538941.495 | 0.780679 | 0.380483 | 0.6542 | 0.59284 | cis-4-Carboxymethylenebut-2-ene 1,4-diol                                                                                          | 8.8889524  | - | - | - | 24.5583  | 141.102122 |
| POS10310 | 1849848.333 | 1990682.232 | 0.105856 | 0.632762 | 0.8182 | 0.12943 | O-Phospho-4-hydroxy-L-threonine                                                                                                   | -19.719061 | - | - | - | 24.4499  | 216.101535 |
| POS10317 | 3315839.511 | 2870979.033 | -0.20783 | 0.655122 | 0.8304 | 0.27973 | 5-Nitrofurfural                                                                                                                   | -19.17389  | - | - | - | 23.98105 | 142.086172 |
| POS10319 | 3278895.151 | 2072045.975 | -0.66215 | 0.138183 | 0.4613 | 0.79377 | Oxalosuccite                                                                                                                      | 14.023034  | - | - | - | 23.9302  | 191.117542 |
| POS10321 | 4473187.098 | 3219508.554 | -0.47446 | 0.180937 | 0.5068 | 0.74224 | N-Dimethyl-2-aminoethylphosphate                                                                                                  | -9.8445841 | - | - | - | 23.911   | 154.122469 |
| POS10330 | 2305034.506 | 2135840.367 | -0.10998 | 0.55488  | 0.7716 | 0.19321 | Citrate                                                                                                                           | 13.0663    | - | - | - | 23.4882  | 193.133287 |

|          |             |             |          |          |        |         |                                                                            |            |   |   |   |          |            |
|----------|-------------|-------------|----------|----------|--------|---------|----------------------------------------------------------------------------|------------|---|---|---|----------|------------|
| POS10334 | 4242.331777 | 45634.84197 | 3.427206 | 0.262683 | 0.58   | 0.14307 | 2-Octaprenyl-6-methoxyphenol                                               | -8.0323645 | - | - | - | 23.2402  | 670.075302 |
| POS10336 | 144818.6951 | 422272.5886 | 1.543927 | 0.326826 | 0.6319 | 0.35781 | TG(10:0/10:0/18:0)                                                         | -6.839617  | - | - | - | 23.2356  | 668.071714 |
| POS10339 | 77676.5094  | 64460.48211 | -0.26906 | 0.269941 | 0.5872 | 0.06008 | Ubiquinone-8                                                               | -3.1406503 | - | - | - | 23.209   | 728.114493 |
| POS10341 | 2168794.583 | 2282200.165 | 0.073532 | 0.839275 | 0.9268 | 0.04213 | [5-(Aminomethyl)furan-3-yl]methyl phosphate                                | 21.452081  | - | - | - | 23.1623  | 208.13282  |
| POS10345 | 11337835.25 | 9183953.249 | -0.30396 | 0.403675 | 0.6702 | 0.68079 | Trifluoromethanesulfonic acid                                              | 14.610323  | - | - | - | 22.8929  | 151.086469 |
| POS10347 | 4879692.044 | 4819217.052 | -0.01799 | 0.961893 | 0.9827 | 0.01468 | Methyl 2-propenyl selenide                                                 | -12.123909 | - | - | - | 22.6044  | 136.075639 |
| POS10352 | 4859728.696 | 4910897.731 | 0.015111 | 0.952959 | 0.9795 | 0.08572 | 2,3,6-Trihydroxypyridine                                                   | 11.567089  | - | - | - | 22.0574  | 128.106847 |
| POS10355 | 48579165.23 | 109917798.6 | 1.178015 | 0.131085 | 0.4499 | 6.24014 | Fosetyl                                                                    | -6.9645208 | - | - | - | 21.71785 | 111.05541  |
| POS10358 | 3849849.052 | 3240775.536 | -0.24846 | 0.432644 | 0.6912 | 0.41531 | 3-Oxalomalate                                                              | -8.8297326 | - | - | - | 21.5374  | 207.112457 |
| POS10360 | 2045221.006 | 2075294.05  | 0.021059 | 0.918081 | 0.9625 | 0.09113 | 3-(Phosphoacetylamido)-L-alanine                                           | 8.5076785  | - | - | - | 21.5068  | 243.133137 |
| POS10367 | 14610226.83 | 15261060.43 | 0.062877 | 0.817229 | 0.9166 | 0.20009 | Cyanidin                                                                   | 3.2143693  | - | - | - | 21.2584  | 288.2524   |
| POS10369 | 995320.2997 | 1091837.195 | 0.133525 | 0.725953 | 0.8684 | 0.11668 | Benoxacor                                                                  | -4.0698616 | - | - | - | 21.1565  | 261.122718 |
| POS10401 | 2752418.515 | 2026948.54  | -0.44139 | 0.381938 | 0.6555 | 0.46182 | 2,4-Dinitroaniline                                                         | 22.330337  | - | - | - | 19.1812  | 184.132966 |
| POS10403 | 2576007.123 | 2354682.051 | -0.1296  | 0.649089 | 0.8278 | 0.21545 | 4-Nitrophenyl phosphate                                                    | 1.87655    | - | - | - | 19.1558  | 220.096388 |
| POS10407 | 226214.2047 | 234310.1156 | 0.05073  | 0.728906 | 0.8705 | 0.033   | 6-Oxo-2-hydroxy-7-(4'-chlorophenyl)-3,8,8-trichloroocta-2E,4E,7E-trienoate | -7.2220394 | - | - | - | 18.8988  | 383.027418 |
| POS10410 | 4543312.408 | 3874166.967 | -0.22986 | 0.395119 | 0.664  | 0.51743 | Dichlormid                                                                 | -2.6065881 | - | - | - | 18.6627  | 209.091734 |
| POS10413 | 8969916.855 | 7700286.968 | -0.22018 | 0.585834 | 0.7891 | 0.38336 | Dihydroxyaluminium                                                         | -5.3064926 | - | - | - | 18.57765 | 138.077349 |
| POS10418 | 516959.2443 | 429713.6311 | -0.26668 | 0.069804 | 0.3563 | 0.23194 | 1,1-Dichloro-2,2-diphenylethane                                            | 1.2288856  | - | - | - | 18.1392  | 252.158685 |
| POS10430 | 49802091.93 | 35055493.37 | -0.50657 | 0.159648 | 0.4872 | 2.57458 | Trimethylseleniumium                                                       | -0.3039686 | - | - | - | 17.1202  | 125.070839 |
| POS10437 | 922335.3121 | 803392.4882 | -0.19919 | 0.183329 | 0.5093 | 0.19559 | Se-Propenylselenocysteine Se-oxide                                         | -3.985015  | - | - | - | 16.76795 | 225.122783 |
| POS10443 | 1115666.877 | 1203396.412 | 0.109206 | 0.744098 | 0.8791 | 0.09819 | Apraclonidine                                                              | -15.65922  | - | - | - | 16.1028  | 246.111938 |
| POS10446 | 33022207.4  | 42926502.25 | 0.378432 | 0.569227 | 0.7791 | 1.47782 | 5-Diazouracil                                                              | 22.115378  | - | - | - | 15.7555  | 139.09463  |

|          |             |             |          |          |        |         |                                                                 |            |   |   |   |          |            |
|----------|-------------|-------------|----------|----------|--------|---------|-----------------------------------------------------------------|------------|---|---|---|----------|------------|
| POS10448 | 349114.0846 | 214131.6286 | -0.7052  | 0.088966 | 0.3888 | 0.2638  | Calcium L-aspartate                                             | -16.057771 | - | - | - | 15.58765 | 172.169328 |
| POS10460 | 630200.1709 | 548408.617  | -0.20056 | 0.098039 | 0.4044 | 0.20259 | Mitomycin B                                                     | 16.472059  | - | - | - | 14.1935  | 336.3248   |
| POS10464 | 473414.5663 | 398558.8831 | -0.24831 | 0.332594 | 0.6326 | 0.17136 | Clavulanic acid                                                 | -19.500757 | - | - | - | 13.0089  | 200.164193 |
| POS10469 | 3175519.999 | 3680090.613 | 0.212748 | 0.55077  | 0.7698 | 0.33717 | Stipitatote                                                     | -17.878662 | - | - | - | 11.2219  | 209.128056 |
| POS10477 | 2605606.695 | 1845920.929 | -0.49728 | 0.56998  | 0.7794 | 0.35333 | Urate radical                                                   | 19.736112  | - | - | - | 9.9934   | 168.112875 |
| POS10479 | 3606606.015 | 2821097.965 | -0.35439 | 0.397479 | 0.6665 | 0.41656 | Tetrahydroxypteridine                                           | 2.2400043  | - | - | - | 9.94264  | 197.128116 |
| POS10484 | 20607203.98 | 9890783.421 | -1.05899 | 0.01173  | 0.2033 | 2.97921 | <sup>cis-4-</sup><br>Carboxymethylenebut-2-<br>-on-4-olide      | 8.4439709  | - | - | - | 9.520135 | 141.10206  |
| POS10490 | 6045635.799 | 5280613.404 | -0.19519 | 0.662379 | 0.8336 | 0.40262 | 5-Nitrofurfural                                                 | -19.239116 | - | - | - | 9.01517  | 142.086162 |
| POS10493 | 7239646.566 | 5678927.796 | -0.3503  | 0.344057 | 0.6332 | 0.82398 | N-Dimethyl-2-<br>aminoethylphosphate                            | -9.8827164 | - | - | - | 9.00287  | 154.122463 |
| POS10494 | 78623574    | 33774808.77 | -1.21901 | 0.191827 | 0.5185 | 5.19894 | 2,5-Furandicarboxylate                                          | -20.140153 | - | - | - | 8.97005  | 157.097133 |
| POS10509 | 3965990.576 | 3056172.574 | -0.37596 | 0.020593 | 0.2393 | 0.78211 | 3-Fluoro-cis,cis-mucote                                         | -0.29733   | - | - | - | 8.29217  | 161.107129 |
| POS10511 | 3191022.846 | 2356398.314 | -0.43744 | 0.373509 | 0.6502 | 0.40702 | O-Phospho-4-hydroxy-L-<br>threonine                             | -19.765299 | - | - | - | 8.161765 | 216.101525 |
| POS10515 | 1318999.365 | 2274299.004 | 0.785978 | 0.138285 | 0.4613 | 0.64849 | D-Glucurote                                                     | 11.432719  | - | - | - | 7.9499   | 195.148896 |
| POS10524 | 3303764.884 | 3002452.226 | -0.13797 | 0.636685 | 0.8198 | 0.23771 | <sup>N-</sup><br>Acetyldemethylphosphinot                       | 20.356543  | - | - | - | 7.639215 | 210.148434 |
| POS10525 | 2249062.118 | 1927392.177 | -0.22267 | 0.649736 | 0.8284 | 0.19909 | <sup>5-ryürüxy-2-</sup><br>methylpyridine-4,5-<br>dicarboxylate | -18.676968 | - | - | - | 7.62119  | 198.148495 |
| POS10526 | 4607259.066 | 2185962.83  | -1.07564 | 0.011798 | 0.2035 | 1.34362 | 3-(Imidazol-4-yl)-2-<br>oxopropyl phosphate                     | 4.1477348  | - | - | - | 7.54582  | 221.12799  |
| POS10528 | 3948068.272 | 2871237.837 | -0.45947 | 0.113736 | 0.427  | 0.73164 | 3-Oxalomalate                                                   | -8.881729  | - | - | - | 7.505475 | 207.112446 |
| POS10534 | 2422292.177 | 2027886.632 | -0.2564  | 0.44111  | 0.6978 | 0.22859 | S-(1,2-Dichlorovinyl)-L-<br>cysteine                            | 17.794984  | - | - | - | 7.34489  | 217.096722 |
| POS10537 | 28705256.99 | 62920358.4  | 1.132212 | 0.138181 | 0.4613 | 4.63348 | Fosetyl                                                         | -7.1332672 | - | - | - | 7.28604  | 111.055392 |
| POS10546 | 3049027.724 | 3869863.596 | 0.343933 | 0.588594 | 0.7905 | 0.41619 | meso-Tartaric acid                                              | 1.9328006  | - | - | - | 7.23927  | 151.094367 |
| POS10548 | 2530535.4   | 1754083.883 | -0.52872 | 0.105392 | 0.4127 | 0.6489  | Calcium glycerophosphate                                        | 2.8112167  | - | - | - | 7.048895 | 211.143667 |
| POS10549 | 2418664.156 | 2512881.969 | 0.055132 | 0.90175  | 0.9544 | 0.05187 | 2-C-Methyl-D-erythritol 4-<br>phosphate                         | -2.3224271 | - | - | - | 7.00728  | 217.133075 |
| POS10553 | 3410972.313 | 2367095.427 | -0.52707 | 0.096177 | 0.4009 | 0.77274 | D-Ribitol 5-phosphate                                           | -21.781136 | - | - | - | 6.94283  | 233.127921 |

|          |             |             |          |          |        |         |                                        |            |   |   |   |          |            |
|----------|-------------|-------------|----------|----------|--------|---------|----------------------------------------|------------|---|---|---|----------|------------|
| POS10554 | 1019852.278 | 873287.1692 | -0.22383 | 0.326691 | 0.6319 | 0.23505 | DCI                                    | 12.013088  | - | - | - | 6.802495 | 249.159158 |
| POS10560 | 3118381.251 | 2596802.659 | -0.26406 | 0.442655 | 0.6984 | 0.32167 | D-Ribose 5-phosphate                   | -20.784505 | - | - | - | 6.66071  | 231.112294 |
| POS10564 | 6351615.273 | 4384985.095 | -0.53455 | 0.395111 | 0.664  | 0.71756 | Methyl (2-propenylthio) selenide       | 4.6589672  | - | - | - | 6.60834  | 168.138055 |
| POS10565 | 573242.1277 | 474741.1514 | -0.272   | 0.025496 | 0.2569 | 0.25367 | unsym-Bis(4'-chlorophenyl)ethylene     | 3.2436639  | - | - | - | 6.60377  | 250.143285 |
| POS10568 | 1983182.09  | 1965422.079 | -0.01298 | 0.974209 | 0.9877 | 0.01907 | 3-Sulfopyruvate                        | 4.4226984  | - | - | - | 6.45244  | 169.13332  |
| POS10577 | 2891834.04  | 3197920.741 | 0.145149 | 0.660189 | 0.8327 | 0.20168 | L-Amino-3,4-dihydroxypentanedioic acid | 14.600865  | - | - | - | 6.286    | 180.137992 |
| POS10584 | 4585739.899 | 2992636.458 | -0.61574 | 0.294972 | 0.6086 | 0.86185 | Methyl 2-propenyl selenide             | -12.145996 | - | - | - | 6.252305 | 136.075636 |
| POS10586 | 3421285.672 | 2615531.319 | -0.38743 | 0.323469 | 0.6304 | 0.47983 | Oxalosuccite                           | 14.090439  | - | - | - | 6.12628  | 191.117555 |
| POS10611 | 730329.9042 | 605411.2134 | -0.27063 | 0.039937 | 0.2968 | 0.28586 | 1,1-Dichloro-2,2-diphenylethane        | 1.2444556  | - | - | - | 5.252115 | 252.158689 |
| POS10625 | 32567769.87 | 26546445.91 | -0.29493 | 0.272792 | 0.5901 | 1.62906 | Calcium hydroxide                      | -4.2441918 | - | - | - | 4.31168  | 75.0996621 |
| POS10627 | 887152.6414 | 752903.1007 | -0.23672 | 0.300311 | 0.6132 | 0.23859 | 2-Aminophenoxazin-3-one                | 16.613616  | - | - | - | 4.263305 | 213.214902 |
| POS10629 | 547915.4971 | 430537.2165 | -0.34782 | 0.20058  | 0.5255 | 0.20103 | Glyphosate-monoammonium                | -18.792051 | - | - | - | 4.25238  | 187.107379 |
| POS10645 | 4924067.794 | 5197243.703 | 0.077896 | 0.874667 | 0.9446 | 0.06328 | N-Formylmaleamic acid                  | -20.96718  | - | - | - | 3.58254  | 144.101776 |
| POS10647 | 1068333.9   | 862898.0822 | -0.3081  | 0.460242 | 0.7119 | 0.24933 | L-3,4-Dihydroxybutan-2-one 4-phosphate | 0.6190405  | - | - | - | 3.581505 | 185.091791 |
| POS10650 | 4183688.069 | 4851233.451 | 0.213576 | 0.803859 | 0.9105 | 0.07473 | 6-Thiourate                            | 3.4349839  | - | - | - | 3.57309  | 185.183809 |
| POS10652 | 5024427.509 | 4345253.362 | -0.20952 | 0.231489 | 0.553  | 0.45994 | Cyanidin                               | 3.1435284  | - | - | - | 3.57039  | 288.25238  |
| POS10664 | 1383145.001 | 842264.7991 | -0.71561 | 0.07796  | 0.3724 | 0.53705 | Sepiapterin                            | 19.330065  | - | - | - | 2.90197  | 238.227162 |
| POS10666 | 1077227.193 | 1338051.887 | 0.312812 | 0.454679 | 0.7083 | 0.26175 | 1,3,7-Trimethyluric acid               | 9.7542221  | - | - | - | 2.89699  | 211.199327 |
| POS10667 | 790033.7351 | 684581.7452 | -0.20669 | 0.655983 | 0.8308 | 0.13815 | Quite                                  | -22.191808 | - | - | - | 2.89695  | 193.169612 |
| POS10670 | 410929.7796 | 338887.9963 | -0.27808 | 0.081883 | 0.3781 | 0.19928 | 5-FU                                   | -23.631207 | - | - | - | 2.576725 | 131.081403 |
| POS10673 | 1228637.593 | 678044.4906 | -0.85761 | 0.007568 | 0.1804 | 0.66591 | 5-O-Methyl-myo-inositol                | -23.282228 | - | - | - | 2.56663  | 195.185256 |
| POS10685 | 224885.199  | 247320.1589 | 0.137191 | 0.583105 | 0.7875 | 0.06883 | Dimefox                                | -8.5710671 | - | - | - | 2.22312  | 155.128956 |
| POS10687 | 1395639.091 | 1860788.581 | 0.414988 | 0.053378 | 0.3235 | 0.58122 | Trifluoromethyl-bismethyl ketone       | 16.530091  | - | - | - | 2.21922  | 141.113293 |



|          |             |             |          |          |        |         |                                |            |   |   |   |          |            |
|----------|-------------|-------------|----------|----------|--------|---------|--------------------------------|------------|---|---|---|----------|------------|
| POS10689 | 285640.589  | 279292.3194 | -0.03243 | 0.905292 | 0.9562 | 0.01812 | Dopaquinone                    | 5.8898431  | - | - | - | 2.218445 | 196.180526 |
| POS10690 | 1659625.622 | 1870987.941 | 0.172942 | 0.600795 | 0.798  | 0.2403  | 5-Amino-4-imidazolecarboxamide | -8.1380252 | - | - | - | 2.20621  | 127.12285  |
| POS10692 | 3236444.42  | 7973347.917 | 1.300776 | 0.133627 | 0.454  | 1.63625 | Pyrazinoic acid                | 19.592095  | - | - | - | 1.88285  | 125.107208 |

---























































































































































































































































\_\_\_\_\_

\_\_\_\_\_

\_\_\_\_\_
