# Supplementary material for: Rice SST Variation Shapes the Rhizosphere Bacterial Community, Conferring Tolerance to Salt Stress through Regulating Soil Metabolites
Source: PubMed Central journal article supplement (PMC7687028; doi:10.1128/msystems.00721-20), 2020-11-24
Supplement: mSystems.00721-20-st004.pdf [file mSystems.00721-20-st004.pdf]

**TableS4 Differentially expressed metabolites between Na-HHZ and Na-HHZcas**

| index    | Na-HHZ      | Na-HHZcas   | log2_FC      | Pvalue      | fdr         | vip         | MS2 name                | MS1 name                                                      | SuperClass                      |
|----------|-------------|-------------|--------------|-------------|-------------|-------------|-------------------------|---------------------------------------------------------------|---------------------------------|
| NEG00124 | 2400674.483 | 1           | -21.19500837 | 0.014054446 | 0.305283932 | 2.016659573 |                         | Glyoxylate                                                    |                                 |
| POS08579 | 13386465.09 | 201652.4264 | -6.052760469 | 0.000669391 | 0.072093715 | 3.329773113 |                         | 3,4-Dihydroxymandelate                                        |                                 |
| NEG06859 | 45093071.34 | 791868.872  | -5.831500417 | 0.021103008 | 0.349501435 | 8.613515666 |                         | Urate-3-ribonucleoside                                        |                                 |
| NEG06714 | 38347747.97 | 1090104.252 | -5.136603837 | 0.019905457 | 0.342903714 | 7.936815596 |                         | 1D-1-Guanidino-3-amino-1,3-dideoxy-scylo-inositol 4-phosphate |                                 |
| NEG05758 | 21813999.43 | 697326.6584 | -4.967275855 | 0.014696934 | 0.308688618 | 6.033726332 |                         | 5'-Phosphoribosyl-N-formylglycimide                           |                                 |
| NEG05744 | 1314105.215 | 42729.18584 | -4.942715152 | 0.012846807 | 0.293169162 | 1.491014448 |                         | Furcozole-cis                                                 |                                 |
| NEG05174 | 1399701.756 | 108351.8176 | -3.691324195 | 0.014383459 | 0.308198598 | 1.539135855 |                         | 3',5'-Cyclic IMP                                              |                                 |
| NEG06536 | 1643172.513 | 140253.1534 | -3.55037884  | 0.028574699 | 0.377967259 | 1.541746365 |                         | Furcozole-cis                                                 |                                 |
| NEG06009 | 1447744.023 | 124045.0011 | -3.544871039 | 0.018205443 | 0.333199597 | 1.470455528 |                         | 3',5'-Cyclic IMP                                              |                                 |
| NEG05452 | 1396435.27  | 153703.0363 | -3.183531131 | 0.014112766 | 0.305283932 | 1.486150821 |                         | 3',5'-Cyclic IMP                                              |                                 |
| POS08397 | 4401472.729 | 540698.7754 | -3.025089335 | 0.004966098 | 0.14961244  | 1.700783548 |                         | 3,6,8-Trimethylallantoin                                      |                                 |
| NEG05045 | 876532.5527 | 119288.7911 | -2.877349183 | 0.011783478 | 0.283126866 | 1.143664426 |                         | 3',5'-Cyclic IMP                                              |                                 |
| NEG07167 | 1320158.455 | 273073.4362 | -2.273350218 | 0.023728695 | 0.359299145 | 1.297608348 |                         | 3',5'-Cyclic IMP                                              |                                 |
| NEG05241 | 1185721.178 | 301131.7908 | -1.977297873 | 0.035150284 | 0.415784531 | 1.184658651 |                         | 2,2-Bis(4-hydroxyphenyl)hexafluoropropane                     |                                 |
| NEG05250 | 898606.0444 | 251436.4643 | -1.837494876 | 0.028115418 | 0.376102621 | 1.080561959 |                         | Dichlofenthion                                                |                                 |
| NEG09044 | 2051885.559 | 582227.1606 | -1.817296222 | 0.043313521 | 0.446660825 | 1.374469508 |                         | 3,4-Bis(7-chloroindol-3-yl)pyrrole-2,5-dicarboxylate          |                                 |
| POS00077 | 7205990.251 | 2263785.316 | -1.670459552 | 0.027011978 | 0.259329536 | 1.995203327 | 2-Ethyl-5-methyloxazole |                                                               | Organoheterocyclic compounds    |
| POS00052 | 2627324.274 | 834028.4366 | -1.655425795 | 0.005665415 | 0.157143689 | 1.216113067 | Oleamide                |                                                               | Lipids and lipid-like molecules |
| POS03550 | 163177720.6 | 55161160.62 | -1.564719376 | 0.019167247 | 0.234011078 | 8.208893111 |                         | Bromobenzene                                                  |                                 |

|          |             |             |              |             |             |             |                                                                            |
|----------|-------------|-------------|--------------|-------------|-------------|-------------|----------------------------------------------------------------------------|
| POS07287 | 2073666.679 | 717702.116  | -1.530726935 | 0.005757959 | 0.158714878 | 1.118963203 | Sedoheptulose 7-phosphate                                                  |
| NEG05379 | 1762097.21  | 621008.9816 | -1.504607477 | 0.023265849 | 0.359299145 | 1.431834374 | sn-Glycero-3-phospho-1-inositol                                            |
| NEG01016 | 2245419.984 | 904517.2426 | -1.311765403 | 0.011684671 | 0.281903717 | 1.440791682 | Iodide                                                                     |
| POS07695 | 39534922.7  | 16198577.03 | -1.28726052  | 0.000403393 | 0.072093715 | 4.827011841 | Dihydrobiopterin                                                           |
| NEG00793 | 40205697.83 | 16563554.6  | -1.279387656 | 0.00118597  | 0.099333335 | 6.200354156 | Dihydrogen phosphate                                                       |
| NEG02663 | 4657733.142 | 1973494.939 | -1.238875165 | 0.021006207 | 0.348864382 | 1.897356946 | 6-Oxo-2-hydroxy-7-(4'-chlorophenyl)-3,8,8-trichloroocta-2E,4E,7E-trienoate |
| POS01566 | 2718972.526 | 1166547.417 | -1.220816624 | 0.008577854 | 0.1899382   | 1.12407678  | Calcium formate                                                            |
| POS08872 | 48364024.33 | 20797460.76 | -1.2175269   | 0.039866595 | 0.296823582 | 4.067903918 | 1-Methyladenosine                                                          |
| POS07407 | 3500788.567 | 1513192.868 | -1.21008405  | 0.006994102 | 0.176375633 | 1.234158248 | Deoxyviolaceinic acid                                                      |
| POS03157 | 4380982.167 | 1900339.087 | -1.204997473 | 0.048668171 | 0.31603284  | 1.331090573 | Urate radical                                                              |
| POS00897 | 2606100.955 | 1139811.522 | -1.19309769  | 0.025601099 | 0.256908871 | 1.070533686 | 5-O-Methyl-myo-inositol                                                    |
| NEG03459 | 2031096.533 | 910042.7936 | -1.158252516 | 0.041895201 | 0.440482445 | 1.207775345 | L-Selenocysteine                                                           |
| NEG03838 | 1543279.916 | 695378.4165 | -1.150129564 | 0.01986807  | 0.342903714 | 1.181158113 | Dehydrogenated ticlopidine                                                 |
| NEG00550 | 3210551.791 | 1455239.305 | -1.141564857 | 0.004116126 | 0.182519682 | 1.792294863 | (1S,3R)-3-(2,2-Dichloroethenyl)-2,2-dimethylcyclopropanecarboxylate        |
| POS04835 | 7960298.105 | 3628347.674 | -1.133509755 | 0.000354599 | 0.072093715 | 2.048224052 | Iodate                                                                     |
| POS07880 | 49191124.62 | 22443126.22 | -1.132124388 | 0.000524698 | 0.072093715 | 5.14773457  | Deoxyvasicinone                                                            |
| POS06832 | 8737672.346 | 3991349.597 | -1.130372359 | 0.03452599  | 0.28295438  | 1.732441068 | Deoxyviolaceinic acid                                                      |
| POS07621 | 4025651.244 | 1881720.658 | -1.097169716 | 0.00072375  | 0.072093715 | 1.45096254  | Tetrahydrobiopterin                                                        |
| POS07651 | 59076126.79 | 27742215.09 | -1.090492257 | 0.000413466 | 0.072093715 | 5.603196987 | Dinitrosopentamethylenetetramine                                           |
| POS10526 | 4607259.066 | 2185962.83  | -1.075639853 | 0.01179832  | 0.203460029 | 1.343615638 | 3-(Imidazol-4-yl)-2-oxopropyl phosphate                                    |
| POS06546 | 4391394.393 | 2091108.988 | -1.070410853 | 0.006611907 | 0.169578765 | 1.326031741 | 2,4-Dinitroaniline                                                         |

|          |             |             |              |             |             |             |                     |                                                                            |                               |
|----------|-------------|-------------|--------------|-------------|-------------|-------------|---------------------|----------------------------------------------------------------------------|-------------------------------|
| POS10484 | 20607203.98 | 9890783.421 | -1.058992069 | 0.011729955 | 0.203257003 | 2.979209352 |                     | cis-4-Carboxymethylenebut-2-en-4-olide                                     |                               |
| POS07693 | 6893126.528 | 3328897.677 | -1.050113971 | 0.000537766 | 0.072093715 | 1.872584529 |                     | 2-Amino-5-(5-nitro-2-furyl)-1,3,4-thiadiazole                              |                               |
| POS07600 | 4452068.275 | 2156668.594 | -1.045671216 | 0.000772286 | 0.072093715 | 1.490381798 |                     | (alpha-keto-dimethyl-delta-N,N-Dimethylguanidynol) valeric acid            |                               |
| NEG02516 | 5330941.452 | 2582734.647 | -1.045490911 | 0.020897838 | 0.348707276 | 1.885026551 |                     | 6-Oxo-2-hydroxy-7-(4'-chlorophenyl)-3,8,8-trichloroocta-2E,4E,7E-trienoate |                               |
| POS01503 | 2039702.243 | 988900.9411 | -1.044460644 | 0.000491649 | 0.072093715 | 1.002688778 |                     | Calcium formate                                                            |                               |
| POS07694 | 10986698.57 | 5386473.522 | -1.028344964 | 0.000520172 | 0.072093715 | 2.356967592 |                     | 2-Aminophenoxazin-3-one                                                    |                               |
| POS07645 | 2169201.407 | 1067441.947 | -1.023006401 | 0.000949679 | 0.073627187 | 1.044336506 |                     | Niridazole                                                                 |                               |
| POS02079 | 6105992.842 | 3026476.041 | -1.012586968 | 0.00437771  | 0.140178456 | 1.651763758 |                     | Calcium formate                                                            |                               |
| NEG06253 | 3685355.249 | 1829700.18  | -1.010196431 | 0.018506669 | 0.334446937 | 1.852532501 |                     | Fosetyl                                                                    |                               |
| POS07996 | 4649288.006 | 2344240.448 | -0.987889244 | 0.023815184 | 0.24970921  | 1.258437357 |                     | 3-Nitroacrylate                                                            |                               |
| POS00909 | 8236402.461 | 4178650.806 | -0.978977124 | 0.045535206 | 0.312252296 | 1.641496734 |                     | Calcium peroxide                                                           |                               |
| NEG06349 | 2692893.484 | 1384122.146 | -0.960185902 | 0.013633444 | 0.301208218 | 1.542391919 |                     | 2,2-Bis(4-hydroxyphenyl)hexafluoropropane                                  |                               |
| POS00869 | 4552425.59  | 2343208.961 | -0.958149821 | 0.036570901 | 0.286720761 | 1.231508071 |                     | 3-Nitroacrylate                                                            |                               |
| NEG02823 | 2099045.144 | 1089199.494 | -0.946464977 | 0.021575794 | 0.350245329 | 1.249234217 |                     | 6-Oxo-2-hydroxy-7-(4'-chlorophenyl)-3,8,8-trichloroocta-2E,4E,7E-trienoate |                               |
| POS00093 | 14152109.2  | 7458545.147 | -0.924050932 | 0.005853045 | 0.160921135 | 2.416829754 | piperazine          |                                                                            | Organoheterocyclic compounds  |
| POS04407 | 3799881.9   | 2018150.234 | -0.912921006 | 0.000148472 | 0.072093715 | 1.299215458 |                     | Isopentenyl phosphate                                                      |                               |
| POS00095 | 288193621.2 | 153600702.6 | -0.907853588 | 0.03983753  | 0.296823582 | 9.076384809 | Tranexamic Acid     |                                                                            | Organic acids and derivatives |
| POS05619 | 4388865.239 | 2367578.812 | -0.890435522 | 0.044237765 | 0.308424313 | 1.236467008 |                     | Pterin                                                                     |                               |
| POS08374 | 7849444.459 | 4234825.755 | -0.890287941 | 0.036552944 | 0.286720761 | 1.514142587 |                     | Caffeoyl aspartic acid                                                     |                               |
| POS00013 | 102559831   | 55778693.51 | -0.878679741 | 0.021447563 | 0.243763753 | 5.978383523 | 4-Hydroxybenzylamin |                                                                            | Benzenoids                    |

|          |             |             |              |             |             |             |                                                                     |                               |
|----------|-------------|-------------|--------------|-------------|-------------|-------------|---------------------------------------------------------------------|-------------------------------|
| POS03102 | 3810370.393 | 2083245.134 | -0.871098633 | 0.029575156 | 0.267376414 | 1.101914763 | Calcium formate                                                     |                               |
| POS00959 | 5205296.624 | 2848271.763 | -0.869893573 | 0.045881587 | 0.313354961 | 1.192403199 | L-Hexahydro-3-imino-1,2,4-oxadiazepine-3-carboxylic acid            |                               |
| POS09187 | 17928339.45 | 9894325.314 | -0.857568631 | 0.046322038 | 0.313354961 | 2.021136182 | Atheroline                                                          |                               |
| POS07641 | 20205217.48 | 11160763.15 | -0.856292202 | 0.000293785 | 0.072093715 | 3.00792197  | 3-Fluoro-1-(4-hydroxyphenyl)-1-propanone                            |                               |
| POS07812 | 3175824.672 | 1798992.812 | -0.819941846 | 0.00992098  | 0.194020584 | 1.071433652 | 1,3,7-Trimethyluric acid                                            |                               |
| POS05331 | 7250184.013 | 4170809.92  | -0.797690047 | 0.034345131 | 0.282554754 | 1.386915106 | 2,3,6-Trihydroxypyridine                                            |                               |
| POS06796 | 4055262.154 | 2336170.931 | -0.795649345 | 0.030725041 | 0.269790077 | 1.073356022 | cis-4-Carboxymethylenebut-2-en-4-olide                              |                               |
| POS07679 | 3168361.513 | 1865733.17  | -0.763994285 | 0.000767463 | 0.072093715 | 1.124056944 | 5-O-Methyl-myo-inositol                                             |                               |
| POS00057 | 8409429.499 | 4955991.37  | -0.762834255 | 0.034256748 | 0.282044584 | 1.413434707 | 5-aminopentanoic acid                                               | Organic acids and derivatives |
| POS07674 | 6062619.584 | 3620271.85  | -0.743843265 | 0.000872095 | 0.073441401 | 1.532542106 | Sepiapterin                                                         |                               |
| POS00707 | 4440965.275 | 2657453.505 | -0.74082884  | 0.03885227  | 0.295117207 | 1.085832827 | 3-Nitroacrylate                                                     |                               |
| POS06392 | 41898081.34 | 25178547.01 | -0.734689149 | 0.009051021 | 0.191741123 | 3.563688023 | Calcium hydroxide                                                   |                               |
| POS07836 | 3722652.915 | 2275198.583 | -0.71033864  | 0.008896579 | 0.191741123 | 1.024470679 | p-Benzoquinone                                                      |                               |
| POS03222 | 13097967.79 | 8232708.833 | -0.66990388  | 0.014406622 | 0.218215654 | 1.8668604   | Trifluoromethyl-bismethyl ketone                                    |                               |
| NEG00031 | 3253867.43  | 2061257.197 | -0.658630942 | 0.019710986 | 0.342903714 | 1.473053624 | (3R,4R)-3,4-dihydroxyoxolan-2-one                                   | Organoheterocyclic compounds  |
| NEG09490 | 5578482.881 | 3643373.461 | -0.614597937 | 0.007169098 | 0.237597298 | 1.748089951 | (1S,3R)-3-(2,2-Dichloroethenyl)-2,2-dimethylcyclopropanecarboxylate |                               |
| POS07088 | 11047854.46 | 7297549.609 | -0.598282201 | 0.036822551 | 0.288299551 | 1.62191683  | 3-Deoxy-lyxo-heptulosaric acid                                      |                               |
| POS02076 | 14643988.51 | 9778792.614 | -0.582580295 | 0.022756729 | 0.247269242 | 1.941319102 | Cyazine                                                             |                               |
| POS08129 | 5446483.671 | 3659839.766 | -0.573544619 | 0.027942624 | 0.262251643 | 1.149414258 | Tulobuterol hydrochloride                                           |                               |
| POS04949 | 5495930.804 | 3712547.503 | -0.565954355 | 0.020634683 | 0.239332829 | 1.081778564 | Pyrazinoic acid                                                     |                               |

|          |             |             |              |             |             |             |                                      |                                                                            |                                         |
|----------|-------------|-------------|--------------|-------------|-------------|-------------|--------------------------------------|----------------------------------------------------------------------------|-----------------------------------------|
| NEG02269 | 16026636.84 | 11020990.4  | -0.540217834 | 0.030830837 | 0.395331452 | 3.00835747  |                                      | 6-Oxo-2-hydroxy-7-(4'-chlorophenyl)-3,8,8-trichloroocta-2E,4E,7E-trienoate |                                         |
| POS03315 | 8159010.352 | 5643986.411 | -0.531679656 | 0.046494988 | 0.313604117 | 1.329232492 |                                      | Nitrosylsulfuric acid                                                      |                                         |
| POS08496 | 5305854.343 | 3712608.124 | -0.515152028 | 0.025323618 | 0.256230931 | 1.074469924 |                                      | D-Erythroascorbic acid 1'-a-D-xylopyranoside                               |                                         |
| POS00073 | 5971477.086 | 4216424.797 | -0.502067613 | 0.000635091 | 0.072093715 | 1.274855982 | Ketoconazole                         |                                                                            | Organoheterocyclic compounds            |
| POS06799 | 36562087.02 | 26256096.07 | -0.477696001 | 0.002322685 | 0.106520599 | 3.021382474 |                                      | Calcium hydroxide                                                          |                                         |
| POS07771 | 24276037.6  | 17636418.45 | -0.460975348 | 0.00535424  | 0.154294804 | 2.307344891 |                                      | Calcium hydroxide                                                          |                                         |
| NEG04183 | 8851981.532 | 6431807.786 | -0.460776149 | 0.024246309 | 0.359490941 | 1.99640669  |                                      | N-(3,5-Dichlorophenyl)succinimide                                          |                                         |
| POS01670 | 5800336.829 | 4252696.793 | -0.447758683 | 0.002768694 | 0.114328902 | 1.163474616 |                                      | Paramethadione                                                             |                                         |
| POS00004 | 32970728.87 | 24533805.07 | -0.426414774 | 0.032432729 | 0.277321862 | 2.474100926 | (2R,3R,4S,5R)-2-(6-aminopurin-9-yl)5 |                                                                            | NUCLEOSIDES, nucleotides, and analogues |
| POS10267 | 27100572.77 | 20327373.96 | -0.414899494 | 0.036037099 | 0.28549391  | 2.222399457 |                                      | Calcium hydroxide                                                          |                                         |
| NEG00016 | 30393216.95 | 22888215.35 | -0.409144407 | 0.037998378 | 0.427671521 | 3.01950651  | heptadecanoic acid                   |                                                                            | Lipids and lipid-like molecules         |
| POS03956 | 6476396.699 | 4910717.986 | -0.399257384 | 0.008333515 | 0.188101157 | 1.072298786 |                                      | Cyazine                                                                    |                                         |
| NEG00067 | 5352784.434 | 4079433.36  | -0.39192078  | 0.047831261 | 0.463201126 | 1.218132516 | 16-Hydroxy hexadecanoic acid         |                                                                            | Lipids and lipid-like molecules         |
| POS04413 | 10226941.74 | 7823855.041 | -0.386423241 | 0.013317643 | 0.213541521 | 1.377947462 |                                      | Trimethylselenium                                                          |                                         |
| NEG06275 | 62565109.73 | 48830516.05 | -0.357575318 | 0.024893436 | 0.359621919 | 4.295807347 |                                      | Nifurthiazole                                                              |                                         |
| NEG06031 | 9458616.874 | 7619404.963 | -0.3119509   | 0.001153854 | 0.099333335 | 1.827240256 |                                      | Angelicin                                                                  |                                         |
| NEG06109 | 5311670.658 | 4314993.658 | -0.299807259 | 0.01411994  | 0.305283932 | 1.233635314 |                                      | 3-hydroxy-2-methyl-2-[(sulfoxy)methyl]propanoic acid                       |                                         |
| POS08953 | 15803116.43 | 12903069.19 | -0.292494817 | 0.02272383  | 0.247269242 | 1.380424117 |                                      | Pyrazimide                                                                 |                                         |
| POS04801 | 70641034.81 | 57771659.51 | -0.29014454  | 0.022149497 | 0.245398822 | 2.867629245 |                                      | Cyazine                                                                    |                                         |
| POS01158 | 8446921.389 | 6935637.158 | -0.2843972   | 0.015505979 | 0.222611825 | 1.018232905 |                                      | Cyazine                                                                    |                                         |

|          |             |             |              |             |             |             |                |                                                             |                              |
|----------|-------------|-------------|--------------|-------------|-------------|-------------|----------------|-------------------------------------------------------------|------------------------------|
| NEG03785 | 9761883.089 | 8113609.789 | -0.266815554 | 0.003041579 | 0.15064018  | 1.812468438 |                | Ticlopidine                                                 |                              |
| NEG02965 | 27072440.93 | 23394670.24 | -0.210645078 | 0.040957389 | 0.43999784  | 2.577398767 |                | Radon-222                                                   |                              |
| NEG06831 | 7941628.166 | 6971706.913 | -0.187922894 | 0.041423625 | 0.440339605 | 1.082815362 |                | Angelicin                                                   |                              |
| NEG00018 | 7748543.946 | 6873229.283 | -0.172937147 | 0.047974057 | 0.463201126 | 1.253973555 | phthalic acid  |                                                             | Benzenoids                   |
| NEG06729 | 2662778.072 | 3233136.181 | 0.280002083  | 0.009142895 | 0.25888362  | 1.035657361 |                | Bowdichione                                                 |                              |
| NEG06865 | 6159406.997 | 8717847.42  | 0.501180493  | 0.004312227 | 0.186047324 | 2.156903273 |                | 2,3,4-trihydroxy-5-(3,4,5-trihydroxybenzoyloxy)benzoic acid |                              |
| NEG06591 | 5792459.938 | 8385816.807 | 0.533775153  | 0.012539338 | 0.292275182 | 2.180862299 |                | Arbutin 6-phosphate                                         |                              |
| NEG06372 | 110621844.8 | 191365108.1 | 0.790691498  | 0.007651413 | 0.242747668 | 12.11408505 |                | Coformycin                                                  |                              |
| NEG06374 | 21041892.86 | 36858955.2  | 0.808750687  | 0.009665771 | 0.261464066 | 5.32282442  |                | 3,5,7-trihydroxy-2-(3-methoxyphenyl)-5H-chromen-5-yl        |                              |
| NEG06375 | 1850143.155 | 3326628.343 | 0.846423791  | 0.00971823  | 0.261464066 | 1.625766283 |                | Salicin                                                     |                              |
| NEG09348 | 871273.1375 | 1791335.521 | 1.039838614  | 0.013573115 | 0.300933556 | 1.27795349  |                | Arbutin 6-phosphate                                         |                              |
| NEG04613 | 1973880.481 | 4131060.98  | 1.065477719  | 0.038821193 | 0.432359756 | 1.757012032 |                | sn-Glycerol 3-phosphate                                     |                              |
| NEG06239 | 678117.8831 | 1458935.249 | 1.105307858  | 0.004745103 | 0.192716609 | 1.233328723 |                | 5'-Phosphoribostamycin                                      |                              |
| NEG08509 | 1409898.05  | 3431765.186 | 1.283359996  | 0.003303615 | 0.157423006 | 1.937830031 |                | Procymidone                                                 |                              |
| NEG09462 | 1896675.723 | 5260165.476 | 1.471635145  | 0.00864269  | 0.255127434 | 2.375560304 |                | 2-Phosphoglycolate                                          |                              |
| NEG08516 | 2651835.704 | 7621567.264 | 1.523096302  | 0.000683972 | 0.094678188 | 3.167868022 |                | 5-O-(1-Carboxyvinyl)-3-phosphoshikimate                     |                              |
| NEG08510 | 497880.5767 | 1454441.65  | 1.54659378   | 0.000643234 | 0.094678188 | 1.38435328  |                | Chlorobenzilate                                             |                              |
| NEG08470 | 1088488.619 | 3431107.04  | 1.656347812  | 0.000759708 | 0.094678188 | 2.172919594 |                | Diclofec                                                    |                              |
| NEG08560 | 1895793.333 | 6165263.165 | 1.701360778  | 0.001081911 | 0.096846181 | 2.911356338 |                | Azafenidin                                                  |                              |
| POS00033 | 1334822.543 | 4463774.318 | 1.741616132  | 0.040329121 | 0.297462031 | 1.365413309 | Gentiaticetine |                                                             | Organoheterocyclic compounds |
| NEG04724 | 1568132.372 | 5269196.865 | 1.748535734  | 0.049374635 | 0.471063574 | 1.885753473 |                | Dihydrogen phosphate                                        |                              |

|          |             |             |             |             |             |             |                                                        |
|----------|-------------|-------------|-------------|-------------|-------------|-------------|--------------------------------------------------------|
| NEG08559 | 325408.723  | 1211059.246 | 1.895944614 | 0.000572499 | 0.094678188 | 1.339056525 | 1-(5-Phospho-D-ribosyl)-5-amino-4-imidazolecarboxylate |
| NEG08662 | 101038275.6 | 391403817.7 | 1.953755906 | 0.001588109 | 0.112740328 | 23.84965055 | Etobenzanid                                            |
| NEG08626 | 141986983.8 | 561944944.5 | 1.984670111 | 0.000814945 | 0.094678188 | 29.08321505 | 2,4-Dioxotetrahydropyrimidine D-ribonucleotide         |
| NEG08660 | 2105879.633 | 8334610.528 | 1.984691807 | 0.001831536 | 0.116949658 | 3.483824416 | Propicozole                                            |
| NEG08618 | 2799449.052 | 11094864.78 | 1.986677255 | 0.000874735 | 0.094678188 | 4.089329683 | Fluorodifen                                            |
| NEG08665 | 818604.6189 | 3254264.674 | 1.99109288  | 0.001566504 | 0.112740328 | 2.186335036 | Boscalid                                               |
| NEG08628 | 5746092.945 | 23158626.25 | 2.010896442 | 0.000887737 | 0.094678188 | 5.914777729 | Etacozole                                              |
| NEG08584 | 2431169.497 | 10568999.76 | 2.120116464 | 0.000605775 | 0.094678188 | 4.07203107  | Eudistomin G                                           |
| NEG08613 | 175858.3844 | 838499.6539 | 2.253396068 | 0.000754075 | 0.094678188 | 1.150620632 | 3',5'-Cyclic AMP                                       |
| NEG07178 | 2600285.883 | 15305188.88 | 2.557278698 | 0.000952295 | 0.094678188 | 5.055815512 | Bis(4-nitrophenyl)phosphate                            |
| NEG06812 | 1246070.162 | 16439048.05 | 3.721669549 | 0.000136532 | 0.094678188 | 5.810733424 | 1-Methylseleno-N-acetyl-D-galactosamine                |
| NEG08014 | 616726.3264 | 37510166.4  | 5.92650742  | 0.013389441 | 0.298908181 | 8.351596574 | 5-Fluorodeoxyuridine monophosphate                     |
| NEG08430 | 137305.6285 | 35672615.21 | 8.021282409 | 0.000275084 | 0.094678188 | 8.792625094 | Diclofop                                               |

---
